# Supplementary material for: Translatome Regulation in Neuronal Injury and Axon Regrowth
Source: eNeuro. 2018 May 10;5(2):ENEURO.0276-17.2018. doi: 10.1523/ENEURO.0276-17.2018 (PMC5944006; doi:10.1523/ENEURO.0276-17.2018)
Supplement: Extended Data Figure 3-1 — DEGs from RNA-seq of Input and RiboTag pull-downs of lumbar DRG after SN injury. Isl1-Ribotag, neuron-specific Cre, Dhh-Ribotag, glial Cre. Each spreadsheet lists the DEG for a different fraction-input fraction, Isl1 Ribotag pull-down, and Dhh Ribotag pull-down. Data include transcripts IDs, log fold change (logFC), p values, FDR values, FPKM values, counts, and normalized counts. Download Figure 3-1, XLSX file. [file sup_enu-eN-NWR-0276-17-s03.xlsx]

## Sheet: Input DEG injury
name	refSeq	entrez	chromosome	description	Rank	avg_fpkm	logFC_Input_4hr_vs_Input_naive	logFC_Input_12hr_vs_Input_naive	logFC_Input_24hr_vs_Input_naive	PValue_Input_4hr_vs_Input_naive	PValue_Input_12hr_vs_Input_naive	PValue_Input_24hr_vs_Input_naive	FDR_Input_4hr_vs_Input_naive	FDR_Input_12hr_vs_Input_naive	FDR_Input_24hr_vs_Input_naive	FPKM_Islt.4hr.DRG.input.2	FPKM_Islt.4hr.DRG.input.3	FPKM_Islt.12hr.DRG.input.2	FPKM_Islt.12hr.DRG.input.3	FPKM_Islt.24hr.DRG.input.2	FPKM_Islt.24hr.DRG.input.3	FPKM_Islt.Naive.DRG.input.1	FPKM_Islt.Naive.DRG.input.2	FPKM_Islt.Naive.DRG.input.3	Islt.4hr.DRG.input.2_vs_Input_naive	Islt.4hr.DRG.input.3_vs_Input_naive	Islt.12hr.DRG.input.2_vs_Input_naive	Islt.12hr.DRG.input.3_vs_Input_naive	Islt.24hr.DRG.input.2_vs_Input_naive	Islt.24hr.DRG.input.3_vs_Input_naive	Islt.4hr.DRG.input.2_normlizedCount	Islt.4hr.DRG.input.3_normlizedCount	Islt.12hr.DRG.input.2_normlizedCount	Islt.12hr.DRG.input.3_normlizedCount	Islt.24hr.DRG.input.2_normlizedCount	Islt.24hr.DRG.input.3_normlizedCount	Islt.Naive.DRG.input.1_normlizedCount	Islt.Naive.DRG.input.2_normlizedCount	Islt.Naive.DRG.input.3_normlizedCount	Islt.4hr.DRG.input.2	Islt.4hr.DRG.input.3	Islt.12hr.DRG.input.2	Islt.12hr.DRG.input.3	Islt.24hr.DRG.input.2	Islt.24hr.DRG.input.3	Islt.Naive.DRG.input.1	Islt.Naive.DRG.input.2	Islt.Naive.DRG.input.3
March4	NM_001045533	381270	chr1	membrane-associated ring finger (C3HC4) 4	6716	6.19424	0.0625978	0.101146	0.357341	0.604783	0.401819	0.00278853	0.93297	0.755725	0.0412025	6.23558	5.48136	5.85164	6.17787	7.61891	6.86542	5.58168	5.74144	6.11817	0.164925	-0.047937	0.0521103	0.148412	0.459826	0.245728	1114.17	961.199	1030.29	1101.48	1367.1	1178.42	952.346	980.803	1047.97	1119	956	1078	1119	1454	1192	927	930	994
March6	NM_172606	223455	chr15	membrane-associated ring finger (C3HC4) 6	541	50.5545	0.0810294	0.250578	0.108481	0.355168	0.0040947	0.215374	0.842292	0.0654473	0.565906	48.426	49.7651	53.8679	56.4369	52.5555	48.2539	44.5274	50.6033	49.0632	0.0748563	0.0871293	0.20726	0.292584	0.198987	0.0117769	12887.2	12997.3	14126	14986.7	14045.2	12335.8	11315.1	12874.8	12516.6	12943	12927	14780	15225	14938	12478	11014	12208	11872
March7	NM_020575	57438	chr2	membrane-associated ring finger (C3HC4) 7	4445	18.812	0.470391	0.448315	0.313559	0.000515365	0.00093524	0.0210173	0.0281651	0.0232694	0.164014	19.1014	22.5764	19.9696	20.999	21.2942	16.2573	13.5373	16.7604	16.3974	0.359166	0.573134	0.402038	0.49264	0.521961	0.0687645	2216.4	2570.9	2283.28	2431.33	2481.28	1812.11	1499.92	1859.3	1823.93	2226	2557	2389	2470	2639	1833	1460	1763	1730
March8	NM_027920	71779	chr6	membrane-associated ring finger (C3HC4) 8	4644	10.3783	-0.316008	-0.0105261	-0.00988923	0.00180163	0.916113	0.92116	0.0647913	0.976964	0.972405	8.25209	9.19702	11.2559	10.2823	10.5064	11.2549	10.5115	11.7666	11.4521	-0.381974	-0.252724	0.0444168	-0.067936	-0.0276534	0.0075851	1592.1	1741.42	2139.92	1979.52	2035.6	2085.95	1936.54	2170.41	2118.08	1599	1732	2239	2011	2165	2110	1885	2058	2009
Sept2	NM_010891	18000	chr1	septin 2	3129	23.8451	-0.396889	0.0277062	0.0313734	0.000646938	0.809104	0.784396	0.0334563	0.954557	0.924622	17.1839	20.5719	26.2832	24.3141	22.6752	28.651	23.3877	27.694	26.0833	-0.517691	-0.285244	0.0739586	-0.020248	-0.111709	0.16166	2362.76	2776.01	3561.12	3335.95	3130.96	3784.38	3070.72	3640.55	3438.06	2373	2761	3726	3389	3330	3828	2989	3452	3261
0610010F05Rik	NM_027860	71675	chr11	RIKEN cDNA 0610010F05 gene	1380	39.6736	0.26772	0.206315	0.0536812	0.00251245	0.0200192	0.546605	0.0784771	0.181946	0.822595	41.7776	44.3893	39.2196	43.2335	36.6616	38.2642	34.5767	39.2665	37.3187	0.237144	0.297539	0.124773	0.283446	0.0547917	0.0524879	7381.03	7696.62	6827.87	7621.79	6504.52	6494.14	5833.23	6632.52	6320.51	7413	7655	7144	7743	6918	6569	5678	6289	5995
0610030E20Rik	NM_026696	68364	chr6	RIKEN cDNA 0610030E20 gene	9441	2.28672	-1.13423	0.0375325	-0.0150008	4.62695e-10	0.825918	0.930096	3.21702e-07	0.957479	0.976114	1.06237	1.32105	3.11444	2.24974	2.38146	2.84659	2.55699	2.76115	2.80293	-1.28135	-0.995268	0.244635	-0.205603	-0.114534	0.0784662	210.089	256.387	606.902	443.937	472.929	540.766	482.853	522.041	531.368	211	255	635	451	503	547	470	495	504
1110032F04Rik	NM_001167996	68725	chr3	RIKEN cDNA 1110032F04 gene	3412	26.9654	0.010368	-0.00225538	-0.351657	0.909068	0.980174	0.000130938	0.984257	0.996174	0.00368246	27.4317	29.2588	27.4006	28.7201	22.2206	22.2445	28.8781	29.5687	28.9703	-0.0229754	0.0429514	-0.0458375	0.0401073	-0.320734	-0.383184	3017.93	3159.08	2970.46	3152.86	2454.94	2350.9	3033.73	3110.08	3055.35	3031	3142	3108	3203	2611	2378	2953	2949	2898
1110038B12Rik	NR_027943	68763	chr17	RIKEN cDNA 1110038B12 gene	9872	21.3471	-0.0761368	0.270952	0.458655	0.662589	0.113957	0.00700716	0.947762	0.458873	0.0786499	17.8577	17.4446	23.5564	21.3257	28.5866	22.8519	21.0186	18.1354	18.6681	-0.045782	-0.106439	0.331564	0.206455	0.637475	0.251233	334.551	320.735	434.864	398.658	537.814	411.257	376.006	324.831	335.272	336	319	455	405	572	416	366	308	318
1190002N15Rik	NM_001033145	68861	chr9	RIKEN cDNA 1190002N15 gene	3631	16.2439	-0.0603104	-0.503596	-0.546589	0.579179	5.12716e-06	7.79743e-07	0.926875	0.000451876	4.80713e-05	17.6259	19.0292	13.7059	13.22	11.4309	15.0309	18.7582	21.1502	19.4492	-0.102624	-0.0192168	-0.486613	-0.520552	-0.721051	-0.390233	2971.13	3148.02	2276.59	2223.64	1934.99	2433.94	3019.35	3408.54	3142.86	2984	3131	2382	2259	2058	2462	2939	3232	2981
1700066M21Rik	NM_028546	73467	chr1	RIKEN cDNA 1700066M21 gene	3639	21.6223	0.132135	0.042809	-0.308095	0.196041	0.675987	0.00296449	0.71917	0.899902	0.0430401	22.5327	25.1085	21.1181	23.5849	16.9929	18.4294	20.9015	24.3101	22.2918	0.0660939	0.195129	-0.0486375	0.128803	-0.334756	-0.281732	2891.47	3162.1	2670.36	3019.97	2189.8	2271.81	2561.16	2982.47	2742.23	2904	3145	2794	3068	2329	2298	2493	2828	2601
1810026B05Rik	NA	NA	NA	NA	9428	2.13403	0.261639	0.501314	0.268467	0.163082	0.0070019	0.151735	0.679568	0.0943147	0.482094	1.81465	2.43195	2.75317	2.25182	2.46998	1.80994	1.69118	1.84958	1.95428	0.0503768	0.444855	0.629353	0.357961	0.500306	-0.0111698	398.274	523.833	595.431	493.155	544.398	381.599	354.436	388.105	411.177	400	521	623	501	579	386	345	368	390
1810026J23Rik	NM_178619	69773	chr9	RIKEN cDNA 1810026J23 gene	3411	22.1599	0.0402818	0.260984	0.148804	0.680548	0.00721257	0.126709	0.95125	0.0955188	0.440704	20.8515	20.9018	23.5095	25.0921	23.6285	21.719	20.0255	21.5516	21.5033	0.0519701	0.0283751	0.203782	0.315855	0.238365	0.0528304	2820.78	2775.01	3133.9	3387.13	3209.95	2822.46	2586.84	2787.37	2788.62	2833	2760	3279	3441	3414	2855	2518	2643	2645
1810058I24Rik	NR_027875	67705	chr6	RIKEN cDNA 1810058I24 gene	3227	71.645	-0.144019	-0.0512369	-0.264893	0.110628	0.56881	0.00346276	0.590159	0.850489	0.0479916	67.5031	70.2412	75.4028	71.3502	63.3064	64.4314	80.1944	80.7309	75.5035	-0.15918	-0.128905	-0.0207891	-0.0823526	-0.245672	-0.284273	2993.04	3056.53	3294.46	3156.8	2818.81	2744.37	3395.35	3422.25	3209.28	3006	3040	3447	3207	2998	2776	3305	3245	3044
2010315B03Rik	NA	NA	NA	NA	8453	5.71783	-0.0725268	-0.436127	-0.397929	0.616468	0.00303292	0.00672364	0.935277	0.052718	0.0762195	5.96428	6.56728	5.15088	4.57733	4.28583	5.83332	6.60812	6.75561	7.09918	-0.129398	-0.0176865	-0.361782	-0.513695	-0.599289	-0.219234	667.11	720.899	567.713	510.874	481.388	626.776	705.784	722.421	761.204	670	717	594	519	512	634	687	685	722
2310022B05Rik	NM_175149	69551	chr8	RIKEN cDNA 2310022B05 gene	4154	16.4816	0.0834303	-0.777625	-0.42809	0.48903	4.12003e-10	0.000480952	0.893449	1.56249e-07	0.0103957	19.7407	20.8344	11.876	10.4431	11.9153	16.8961	20.9265	19.2205	19.3344	0.0578672	0.108563	-0.696132	-0.863414	-0.66409	-0.224457	2785.93	2885.6	1651.53	1470.61	1688.65	2290.6	2820.04	2593.32	2615.71	2798	2870	1728	1494	1796	2317	2745	2459	2481
2310047M10Rik	NM_028005	71923	chr11	RIKEN cDNA 2310047M10 gene	5324	21.9538	0.0255123	-0.00557272	0.421683	0.837442	0.964269	0.000595463	0.980046	0.992501	0.0123749	21.4415	18.851	21.4037	18.0361	23.766	29.8833	22.5107	19.7381	19.2928	0.127983	-0.0847196	0.10422	-0.124485	0.282462	0.548743	1648.86	1422.69	1621.91	1383.99	1835.32	2207.55	1652.99	1451.17	1422.25	1656	1415	1697	1406	1952	2233	1609	1376	1349
2410006H16Rik	NR_030738	69221	chr11	RIKEN cDNA 2410006H16 gene	9144	27.1252	0.0182315	0.661975	0.851441	0.915884	8.29383e-05	3.58375e-07	0.985159	0.00390215	2.39843e-05	20.194	19.7887	33.9195	28.5314	40.5957	31.0204	22.0937	20.8585	18.3922	0.0461248	-0.0100587	0.771649	0.54058	1.05778	0.606297	397.279	382.067	657.554	560.091	802.021	586.24	415.045	392.323	346.872	399	380	688	569	853	593	404	372	329
2510039O18Rik	NM_029841	77034	chr4	RIKEN cDNA 2510039O18 gene	5002	15.8851	0.0220104	0.234665	0.304935	0.853001	0.0465586	0.00954359	0.982172	0.291572	0.0996147	14.968	13.7395	16.6694	16.5815	19.5056	15.6383	15.2318	14.7464	13.9662	0.09531	-0.0552249	0.229333	0.239818	0.483206	0.100568	1744.44	1571.5	1914.36	1928.33	2282.89	1750.82	1695.11	1643.1	1560.36	1752	1563	2003	1959	2428	1771	1650	1558	1480
2610002M06Rik	NM_025921	67028	chrX	RIKEN cDNA 2610002M06 gene	3497	11.5674	0.0467994	0.0303019	-0.263875	0.630913	0.755737	0.00733406	0.940056	0.933154	0.0812699	12.1473	12.289	11.5644	12.5652	9.24392	10.656	11.5717	12.5018	12.6761	0.0518959	0.0415578	-0.0402472	0.0975651	-0.335938	-0.19493	3027.88	3006.26	2840.48	3125.3	2313.9	2551.59	2754.3	2979.31	3029	3041	2990	2972	3175	2461	2581	2681	2825	2873
2610008E11Rik	NM_001004362	72128	chr10	RIKEN cDNA 2610008E11 gene	8304	3.73519	-0.486762	-0.00548581	0.00921951	0.00145192	0.9707	0.950744	0.0555683	0.994459	0.982629	2.48822	3.23004	4.04687	3.91916	3.60042	4.5448	3.77954	4.27248	4.38156	-0.670909	-0.322237	0.00834247	-0.0197571	-0.132794	0.138867	449.054	572.094	719.676	705.775	652.512	787.918	651.337	737.184	758.041	451	569	753	717	694	797	634	699	719
2700089E24Rik	NM_001163445	381820	chr6	RIKEN cDNA 2700089E24 gene	1209	299.371	-0.371817	0.0577405	-0.275782	0.000241	0.563555	0.00628362	0.0166636	0.848434	0.0723455	229.699	276.543	369.282	311.656	259.244	286.538	318.388	343.619	354.759	-0.497107	-0.256464	0.166552	-0.060075	-0.31649	-0.236117	5812.82	6868.14	9208.64	7869.85	6588.2	6965.71	7693.74	8313.58	8606.22	5838	6831	9635	7995	7007	7046	7489	7883	8163
2810403A07Rik	NM_028814	74200	chr3	RIKEN cDNA 2810403A07 gene	6802	8.35433	-0.579106	0.105395	0.172471	1.63334e-06	0.367013	0.138805	0.000417167	0.727227	0.461935	5.55484	5.94766	9.54137	8.92573	10.22	9.27947	8.25511	9.11044	9.32376	-0.614762	-0.543362	0.143628	0.0655865	0.269968	0.0668212	710.92	747.04	1203.29	1139.87	1313.5	1140.85	1008.85	1114.74	1143.91	714	743	1259	1158	1397	1154	982	1057	1085
2810468N07Rik	NA	NA	NA	NA	11856	2.2756	0.185685	-1.16728	-0.536418	0.530688	0.000242186	0.0795589	0.913153	0.00888843	0.349371	2.76731	3.43462	1.61741	0.805374	1.39868	2.41332	3.00886	2.75925	2.69367	0.03643	0.319412	-0.752857	-1.72576	-0.933475	-0.21722	159.309	194.049	91.7598	46.2593	80.8442	133.463	165.402	151.871	148.662	160	193	96	47	86	135	161	144	141
2810474O19Rik	NM_026054	67246	chr6	RIKEN cDNA 2810474O19 gene	7899	3.0191	-0.247455	0.753069	0.546293	0.185478	3.24481e-05	0.00268103	0.706407	0.00185757	0.0398966	1.94944	2.14403	4.39234	3.79056	4.36269	2.75264	2.20595	2.55512	2.78484	-0.303225	-0.19325	0.845909	0.651632	0.863443	0.13583	505.809	545.953	1123	981.391	1136.75	686.089	546.549	633.831	692.672	508	543	1175	997	1209	694	532	601	657
2900008C10Rik	NA	NA	NA	NA	8717	10.1737	-0.0746637	-0.235166	-0.40578	0.612417	0.112771	0.00664884	0.933508	0.457184	0.0755219	11.5115	9.86749	10.3613	8.77047	8.93722	8.19213	12.3459	11.4039	11.256	0.0445761	-0.204421	-0.128257	-0.350219	-0.313922	-0.50315	668.106	562.04	592.563	507.92	520.887	456.734	684.208	632.778	626.258	671	559	620	516	554	462	666	600	594
2900026A02Rik	NM_172884	243219	chr5	RIKEN cDNA 2900026A02 gene	4386	8.80006	0.0550995	-0.0952289	0.260498	0.572338	0.331484	0.00714524	0.924086	0.700339	0.0798417	9.08018	8.28599	8.00814	7.63405	9.46288	10.7689	8.62818	8.53215	8.82001	0.132369	-0.0266803	-0.0700182	-0.120894	0.197977	0.32042	2262.2	2025.96	1965.97	1897.82	2367.5	2577.29	2052.62	2032.26	2106.49	2272	2015	2057	1928	2518	2607	1998	1927	1998
2900052N01Rik	NR_015605	73040	chr9	RIKEN cDNA 2900052N01 gene	4880	17.2528	0.231742	0.647818	-0.362397	0.0409964	7.58328e-09	0.00175623	0.379719	2.06315e-06	0.029352	16.1473	19.5119	22.6665	24.815	10.6771	13.1818	16.0238	14.9993	16.1109	0.103528	0.349383	0.57134	0.720055	-0.486769	-0.24694	1781.28	2112.42	2463.92	2731.56	1182.8	1396.9	1687.92	1581.94	1703.75	1789	2101	2578	2775	1258	1413	1643	1500	1616
3830406C13Rik	NM_178141	218734	chr14	RIKEN cDNA 3830406C13 gene	3161	30.3223	0.00179038	-0.0474808	-0.33139	0.986276	0.64863	0.00163464	0.998957	0.889796	0.0277202	29.6366	34.3668	30.1251	31.6202	23.5207	27.7742	30.57	34.9652	33.705	-0.0945011	0.0920015	-0.0921446	-0.00417277	-0.421756	-0.246032	3159.31	3595.44	3164.48	3363.51	2517.93	2844.21	3111.81	3563.57	3444.39	3173	3576	3311	3417	2678	2877	3029	3379	3267
4930412C18Rik	NR_030693	320152	chr4	RIKEN cDNA 4930412C18 gene	10024	2.11871	-0.33379	-0.417305	-0.723332	0.0576794	0.017987	5.53233e-05	0.450917	0.170498	0.00183167	2.09276	2.15934	1.73509	2.27141	1.46486	1.8167	2.67417	2.73533	2.91543	-0.342186	-0.324128	-0.632937	-0.227424	-0.849082	-0.603408	354.464	358.941	289.584	383.895	249.153	295.593	432.513	442.946	473.381	356	357	303	390	265	299	421	420	449
4930430F08Rik	NM_175128	68281	chr10	RIKEN cDNA 4930430F08 gene	8113	6.87529	-0.119984	-0.280713	-0.433402	0.421493	0.061557	0.00415211	0.865447	0.337889	0.0546985	6.70346	7.79054	6.06018	6.88032	4.97023	6.82887	8.16044	7.60825	8.6828	-0.217657	-0.0281741	-0.384189	-0.183249	-0.642486	-0.248818	692.002	789.268	616.452	708.729	515.236	677.194	804.408	750.898	859.253	695	785	645	720	548	685	783	712	815
4930506M07Rik	NM_175172	71653	chr19	RIKEN cDNA 4930506M07 gene	5876	8.19131	0.132233	0.519945	0.186765	0.282793	1.89981e-05	0.128167	0.791934	0.00120691	0.443096	7.39806	7.97676	10.2474	9.84453	8.90815	7.1442	6.98071	7.03068	7.77373	0.0907718	0.172289	0.539278	0.499559	0.364641	-0.0174652	1288.42	1363.37	1758.58	1710.79	1557.97	1195.22	1160.9	1170.64	1297.84	1294	1356	1840	1738	1657	1209	1130	1110	1231
4931406C07Rik	NM_133732	70984	chr9	RIKEN cDNA 4931406C07 gene	7084	8.6801	-0.0439012	-0.49719	-0.414298	0.755297	0.000525978	0.00373079	0.962765	0.0153976	0.0506408	9.03539	10.4102	7.87596	6.31069	6.54387	8.66589	9.48735	11.1115	10.5243	-0.135188	0.0419064	-0.354316	-0.655481	-0.594041	-0.253254	1022.57	1156.25	878.333	712.664	743.713	942.14	1025.29	1202.27	1141.81	1027	1150	919	724	791	953	998	1140	1083
4931406P16Rik	NM_172741	233103	chr7	RIKEN cDNA 4931406P16 gene	6591	4.6386	-0.213599	0.347276	0.106712	0.0944461	0.00545092	0.396813	0.554737	0.0798809	0.729129	3.69582	3.88126	5.11459	6.04565	5.0203	4.50502	4.10632	4.73984	4.80108	-0.235449	-0.191945	0.211617	0.470831	0.21209	-0.0079903	916.032	944.106	1249.16	1495.22	1249.57	1072.63	971.866	1123.17	1140.75	920	939	1307	1519	1329	1085	946	1065	1082
4933426M11Rik	NM_178682	217684	chr12	RIKEN cDNA 4933426M11 gene	983	43.0577	0.0852876	0.298906	0.55568	0.319908	0.000457012	5.8389e-11	0.82046	0.0141222	8.80408e-09	40.0682	35.8374	42.4844	45.4833	53.4151	52.6758	36.9696	37.5278	36.7199	0.176224	-0.0118233	0.239464	0.355971	0.597053	0.512925	8552.95	7507.6	8936.25	9687.94	11450.1	10801.5	7535.53	7658.66	7513.97	8590	7467	9350	9842	12178	10926	7335	7262	7127
4933431E20Rik	NR_015459	329735	chr3	RIKEN cDNA 4933431E20 gene	4071	10.2912	-0.0190715	-0.162038	-0.384251	0.840927	0.0896017	6.61154e-05	0.980719	0.408075	0.00212545	10.5289	11.6104	9.63009	10.3887	8.586	8.74165	11.4374	11.4066	11.992	-0.0771585	0.0367851	-0.227061	-0.0996008	-0.365247	-0.403335	2429.48	2629.22	2189.62	2391.96	1989.53	1937.66	2520.06	2516.33	2652.61	2440	2615	2291	2430	2116	1960	2453	2386	2516
5930403L14Rik	NA	NA	NA	NA	5467	6.42007	-0.0573557	-0.97174	-0.374224	0.774425	2.61839e-06	0.0640112	0.965981	0.0002686	0.313175	7.00327	8.07273	4.86829	3.12719	4.2666	8.0158	8.19786	7.80883	8.34835	-0.148984	0.0288685	-0.69443	-1.31421	-0.857329	-0.0121887	1696.65	1919.38	1162.19	755.974	1038	1865.5	1896.47	1808.68	1938.85	1704	1909	1216	768	1104	1887	1846	1715	1839
6430571L13Rik	NM_175486	235599	chr9	RIKEN cDNA 6430571L13 gene	8600	5.66537	-0.067183	-0.16349	-0.56978	0.625774	0.236827	5.42489e-05	0.93735	0.623058	0.00181531	6.01583	6.00169	5.78888	5.44384	4.50487	4.03498	6.7769	6.75594	6.02881	-0.0519169	-0.0823408	-0.128511	-0.198933	-0.462392	-0.684859	655.162	641.469	621.234	591.59	492.68	422.133	704.756	703.436	629.422	658	638	650	601	524	427	686	667	597
8430408G22Rik	NM_145980	213393	chr6	RIKEN cDNA 8430408G22 gene	10526	5.6047	2.22052	1.35121	0.545438	1.87256e-19	4.95525e-08	0.0314358	4.68701e-16	1.02756e-05	0.2124	8.32775	13.264	6.29604	5.48872	4.24102	2.51431	2.16806	2.53767	2.47123	1.85539	2.49872	1.43173	1.25242	0.890952	0.0771765	466.976	729.947	347.891	307.114	238.827	135.436	116.094	136.048	132.844	469	726	364	312	254	137	113	129	126
9130023H24Rik	NM_177001	100043133	chr7	RIKEN cDNA 9130023H24 gene	11655	1.01938	-0.391095	-0.83314	-0.491552	0.141793	0.00224657	0.0658665	0.654572	0.0426643	0.318626	1.02944	0.93855	0.679111	0.768165	0.686192	1.17849	1.62628	1.24877	1.13708	-0.311356	-0.470715	-0.927916	-0.733728	-0.886174	-0.175039	157.318	140.762	102.259	117.137	105.29	173.007	237.313	182.457	166.589	158	140	107	119	112	175	231	173	158
9330159F19Rik	NM_001162537	212448	chr10	RIKEN cDNA 9330159F19 gene	2476	17.4915	0.0787266	0.429326	0.251001	0.548051	0.000959218	0.054391	0.918772	0.0236311	0.288208	15.7213	16.2314	21.6327	19.0817	21.2673	14.8905	15.7144	15.393	15.8902	0.0691885	0.0881655	0.508349	0.345477	0.511081	-0.0670529	3786.6	3836.75	5134.28	4586.07	5144.02	3445.28	3614.18	3544.59	3668.95	3803	3816	5372	4659	5471	3485	3518	3361	3480
9530077C05Rik	NM_026739	68283	chr9	RIKEN cDNA 9530077C05 gene	6895	11.6668	0.169759	0.704858	0.443978	0.276401	4.50478e-06	0.00407543	0.787018	0.000410994	0.0540297	10.2652	10.1725	14.5198	15.0677	14.9011	9.90552	9.02309	9.4791	9.72551	0.189446	0.149334	0.668045	0.739551	0.732718	0.0801611	944.907	918.97	1317.02	1383.99	1377.45	875.901	793.108	834.21	858.2	949	914	1378	1406	1465	886	772	791	814
9930104L06Rik	NM_177573	194268	chr4	RIKEN cDNA 9930104L06 gene	9503	3.51277	-0.55454	-0.108881	-0.115011	0.000414611	0.476696	0.452292	0.024227	0.802078	0.763044	2.65676	2.75809	3.79315	3.57504	3.33347	4.09027	3.95045	3.94498	4.45875	-0.56691	-0.540065	-0.0756633	-0.142835	-0.23439	-0.00372612	333.555	339.838	469.27	447.876	420.275	493.313	473.606	473.531	536.638	335	338	491	455	447	499	461	449	509
A2m	NM_175628	232345	chr6	alpha-2-macroglobulin	7836	4.00592	-0.0163425	0.136837	0.524427	0.898068	0.279416	2.56166e-05	0.983169	0.661391	0.000996486	3.52151	3.42807	3.71745	4.0036	5.32172	4.86334	3.59461	3.59703	3.72971	0.0161328	-0.0496476	0.0729327	0.197879	0.617208	0.42343	701.959	670.627	730.187	796.335	1065.28	931.264	684.21	685.509	712.708	705	667	764	809	1133	942	666	650	676
A430033K04Rik	NM_183025	243308	chr5	RIKEN cDNA A430033K04 gene	11554	1.22144	-0.535961	-0.717675	-0.417398	0.0224518	0.00246553	0.0727982	0.282113	0.0451113	0.335198	0.898523	1.27598	0.933136	0.978492	1.01948	1.36618	1.59674	1.70296	1.59123	-0.790371	-0.314821	-0.757384	-0.671426	-0.603639	-0.247538	120.477	167.908	123.287	130.917	137.263	175.972	204.443	218.309	204.539	121	167	129	133	146	178	199	207	194
A4galt	NM_001170954	239559	chr15	alpha 1,4-galactosyltransferase	5210	18.6059	-0.17184	-0.304614	-0.240678	0.1195	0.00600919	0.0295094	0.609069	0.0850735	0.204039	17.291	19.559	17.7603	15.8082	16.9282	18.5163	23.3307	19.6533	21.4681	-0.248927	-0.0982859	-0.231536	-0.381301	-0.273429	-0.208122	1573.19	1746.44	1592.28	1435.17	1546.68	1618.34	2026.94	1709.55	1872.43	1580	1737	1666	1458	1645	1637	1973	1621	1776
A930005H10Rik	NR_027895	68161	chr3	RIKEN cDNA A930005H10 gene	10137	11.6516	-0.406672	-0.212586	-0.474142	0.0258334	0.238579	0.0094931	0.302154	0.624648	0.0993362	10.0135	10.3712	12.201	11.0996	10.0997	9.49585	16.6049	13.3272	12.0461	-0.417128	-0.393652	-0.154113	-0.272151	-0.398753	-0.5512	301.693	306.659	362.227	333.692	305.573	274.831	477.711	383.889	347.928	303	305	379	339	325	278	465	364	330
A930011O12Rik	NA	NA	NA	NA	8643	3.28586	-1.41279	-0.521536	-0.57314	3.77789e-07	0.0507614	0.032149	0.00013906	0.304617	0.214928	1.57125	2.0922	4.83371	1.96305	3.2103	3.39729	4.41924	4.79986	5.91485	-1.61544	-1.23065	-0.0189831	-1.29843	-0.581294	-0.563667	270.826	353.914	821	337.625	555.672	562.515	727.36	790.973	977.329	272	352	859	343	591	569	708	750	927
AA474331	NA	NA	NA	NA	12352	1.7519	-0.192148	-0.420441	-0.916826	0.539668	0.185477	0.00548151	0.916503	0.563547	0.065836	1.70284	2.12096	1.68787	1.56869	1.06749	1.26598	2.58242	2.01892	2.17786	-0.338759	-0.0535995	-0.372188	-0.458091	-0.992066	-0.814432	56.7535	69.3752	55.4306	52.1686	35.7209	40.5323	82.1864	64.3409	69.5896	57	69	58	53	38	41	80	61	66
AA987161	NM_001163246	100416706	chr13	expressed sequence AA987161	8659	2.99348	-0.215433	-0.0310154	0.980906	0.121138	0.821325	1.06117e-13	0.611308	0.956952	2.60523e-11	1.9592	2.29392	2.44908	2.37614	4.82811	4.99764	2.44548	2.59825	2.62245	-0.318516	-0.118504	-0.0184511	-0.0438975	0.986627	0.972407	404.248	464.512	497.942	489.219	1000.4	990.581	481.825	512.55	518.717	406	462	521	497	1064	1002	469	486	492
Aaed1	NA	NA	NA	NA	9044	13.1959	0.0738504	-0.030038	0.645927	0.611839	0.837064	5.30854e-06	0.933346	0.960293	0.000264687	11.5699	12.1269	10.9899	11.0348	16.4097	19.1782	12.4239	11.8341	10.7116	0.0533856	0.0940528	-0.0418539	-0.0178998	0.562724	0.723406	479.921	493.67	449.198	456.735	683.541	764.191	492.096	469.311	425.943	482	491	470	464	727	773	479	445	404
Aars	NM_146217	234734	chr8	alanyl-tRNA synthetase	1302	46.4857	0.121669	0.0770265	0.336302	0.225187	0.443001	0.000752933	0.742296	0.783886	0.0150286	49.4586	41.2929	42.4521	45.5101	55.815	50.3469	43.968	43.0419	42.691	0.258181	-0.0291841	0.0166007	0.135051	0.438671	0.225919	7841.04	6424.74	6631.94	7199.51	8886.14	7667.62	6656.13	6523.89	6488.14	7875	6390	6939	7314	9451	7756	6479	6186	6154
Abca1	NM_013454	11303	chr4	ATP-binding cassette, sub-family A (ABC1), member 1	2341	10.2061	-0.198079	0.425176	0.471079	0.0933591	0.000250775	4.89588e-05	0.55169	0.00894172	0.00166954	7.90237	7.44771	12.1637	11.4701	13.7091	10.8472	8.28568	9.82306	9.2561	-0.142912	-0.255446	0.45794	0.391368	0.657772	0.256005	3460.01	3200.31	5248.02	5011.31	6027.83	4562.41	3464.19	4111.97	3885.08	3475	3183	5491	5091	6411	4615	3372	3899	3685
Abca8a	NM_153145	217258	chr11	ATP-binding cassette, sub-family A (ABC1), member 8a	1071	34.1166	-0.0769747	-0.398994	-0.544747	0.582305	0.00473108	0.000123962	0.927609	0.073008	0.00354199	34.9812	42.294	31.7205	29.9939	22.7914	33.7512	37.0532	40.3474	49.0969	-0.205629	0.0411362	-0.368004	-0.430622	-0.817551	-0.315205	8383.69	9947.79	7491.16	7172.93	5485.3	7770.43	8479.65	9244.82	11279.9	8420	9894	7838	7287	5834	7860	8254	8766	10699
Abca8b	NM_013851	27404	chr11	ATP-binding cassette, sub-family A (ABC1), member 8b	4447	7.94931	-0.124888	-0.301656	-0.429355	0.357676	0.0271445	0.00174717	0.843424	0.21624	0.0292715	7.912	8.86362	7.61893	7.20269	5.4583	8.29868	8.67976	9.56047	10.1617	-0.194847	-0.058134	-0.270494	-0.333396	-0.724061	-0.183959	2085.96	2293.4	1979.35	1894.87	1445.12	2101.77	2185.15	2409.81	2568.27	2095	2281	2071	1925	1537	2126	2127	2285	2436
Abca9	NM_147220	217262	chr11	ATP-binding cassette, sub-family A (ABC1), member 9	8730	2.12335	-0.459419	-0.847474	-0.58118	0.0832958	0.00165554	0.0291498	0.528356	0.0346474	0.202447	1.7123	2.45506	1.51931	1.65588	1.11659	2.77781	2.56614	3.18368	3.13714	-0.725587	-0.233746	-0.918896	-0.776918	-1.33479	-0.086639	458.015	644.485	400.453	441.971	299.912	713.775	655.447	814.169	804.43	460	641	419	449	319	722	638	772	763
Abcb1a	NM_011076	18671	chr5	ATP-binding cassette, sub-family B (MDR/TAP), member 1A	8652	2.80344	-0.154339	-0.55544	-0.47562	0.325843	0.000513011	0.00281884	0.825109	0.0151843	0.0413448	2.83152	3.2173	2.45684	2.11792	2.05423	2.84423	3.16086	3.74463	3.547	-0.234835	-0.0778839	-0.460434	-0.656068	-0.690873	-0.286233	601.394	670.627	514.192	448.86	438.137	580.311	641.063	760.383	722.196	604	667	538	456	466	587	624	721	685
Abcb4	NM_008830	18670	chr5	ATP-binding cassette, sub-family B (MDR/TAP), member 4	9006	3.0959	0.0769747	-0.02096	-0.46175	0.579425	0.88043	0.00120866	0.926875	0.969644	0.0221275	3.41819	3.41691	3.09547	3.28445	2.1859	2.56836	3.34083	3.45708	3.26965	0.0905433	0.0629726	-0.0734808	0.0299518	-0.547062	-0.378859	594.425	583.154	530.436	569.936	381.727	429.054	554.765	574.772	545.077	597	580	555	579	406	434	540	545	517
Abcd1	NM_007435	11666	chrX	ATP-binding cassette, sub-family D (ALD), member 1	10374	2.11793	-0.820728	-0.780363	-0.382578	0.000182006	0.000354794	0.0739971	0.0131665	0.0115032	0.337983	1.3995	1.82115	1.82439	1.4817	1.6708	2.75118	2.77979	3.21495	2.83402	-1.00465	-0.653323	-0.644946	-0.925811	-0.744202	-0.0907851	203.119	259.403	260.919	214.585	243.505	383.58	385.255	446.106	394.313	204	258	273	218	259	388	375	423	374
Abcd2	NM_011994	26874	chr15	ATP-binding cassette, sub-family D (ALD), member 2	5164	7.36354	0.0843319	-0.026365	-0.319275	0.460583	0.818117	0.00588392	0.881645	0.956522	0.0690133	8.00613	7.99503	7.3025	7.50225	6.36015	5.82425	7.08089	8.83712	7.53139	0.0986483	0.0695851	-0.0552111	0.00180844	-0.227122	-0.418004	1892.8	1855.03	1701.23	1769.85	1510.01	1322.75	1598.54	1997.45	1706.91	1901	1845	1780	1798	1606	1338	1556	1894	1619
Abce1	NM_015751	24015	chr8	ATP-binding cassette, sub-family E (OABP), member 1	1260	46.3899	0.0600275	0.194746	0.227502	0.483006	0.0223468	0.00756407	0.890321	0.194856	0.083258	43.0658	45.0481	46.4038	50.2028	50.3181	49.4324	41.3636	45.2846	44.6353	0.040953	0.0787924	0.127411	0.259037	0.27154	0.1819	7007.65	7193.9	7440.5	8151.37	8222.33	7726.93	6427.03	7044.87	6962.57	7038	7155	7785	8281	8745	7816	6256	6680	6604
Abhd17b	NA	NA	NA	NA	2819	35.1598	0.0193906	0.252632	0.356237	0.850179	0.0132027	0.000458831	0.982172	0.140453	0.0100389	29.9968	33.4349	37.9259	36.5372	40.573	40.163	28.7149	33.9325	34.5285	-0.0468401	0.0825871	0.270217	0.234525	0.394832	0.31617	3168.28	3465.74	3947.24	3850.76	4303.44	4075.03	2896.07	3426.47	3496.05	3182	3447	4130	3912	4577	4122	2819	3249	3316
Abhd4	NM_134076	105501	chr14	abhydrolase domain containing 4	1969	44.9873	-0.171232	-0.562806	-0.352974	0.168235	7.76321e-06	0.00472895	0.68415	0.000626562	0.0591828	43.4722	49.9532	36.4195	34.6957	33.5156	49.862	55.7557	56.2243	51.3588	-0.26048	-0.0871084	-0.537031	-0.588856	-0.629578	-0.120608	4936.62	5567.11	4075.31	3931.48	3822.03	5439.3	6045.89	6104.15	5590.94	4958	5537	4264	3994	4065	5502	5885	5788	5303
Abi3bp	NM_178790	320712	chr16	ABI gene family, member 3 (NESH) binding protein	9638	2.21372	0.0492797	-0.177127	-0.717875	0.802485	0.372471	0.000426238	0.970403	0.733051	0.00962883	2.04964	3.20709	2.10004	2.37788	1.40806	1.70685	2.28355	2.57665	3.01468	-0.292393	0.325121	-0.278629	-0.0817053	-0.826334	-0.61344	384.334	590.191	388.028	444.924	265.137	307.456	408.886	461.93	541.906	386	587	406	452	282	311	398	438	514
Abl2	NM_009595	11352	chr1	v-abl Abelson murine leukemia viral oncogene homolog 2 (arg, Abelson-related gene)	3518	6.43391	0.202065	0.370091	0.575455	0.0646658	0.000672485	1.08255e-07	0.475216	0.0183358	7.92284e-06	6.34582	5.55019	6.45735	6.90199	8.34259	7.18014	5.22619	5.467	5.38327	0.307876	0.0876104	0.31178	0.425931	0.708526	0.428093	2901.43	2490.47	2909.3	3148.92	3830.51	3153.65	2281.72	2389.78	2359.52	2914	2477	3044	3199	4074	3190	2221	2266	2238
Acap3	NM_207223	140500	chr4	ArfGAP with coiled-coil, ankyrin repeat and PH domains 3	3317	17.0414	0.260227	0.216692	0.328452	0.0234097	0.0592873	0.00414294	0.288111	0.331207	0.0546985	18.4783	16.4239	15.8495	17.991	19.645	17.2197	16.5169	14.2073	14.5771	0.355349	0.158299	0.112802	0.313692	0.449736	0.195675	3400.27	2966.04	2873.93	3303.47	3630.24	3043.91	2902.23	2499.46	2571.43	3415	2950	3007	3356	3861	3079	2825	2370	2439
Acer2	NM_139306	230379	chr4	alkaline ceramidase 2	10833	1.47557	-0.610988	0.716792	0.661431	0.0143211	0.00229811	0.00495672	0.223188	0.0433822	0.06148	0.831643	0.784882	2.00016	2.05702	2.36224	1.55908	1.07214	1.1374	1.62813	-0.554392	-0.66416	0.68469	0.743101	0.951374	0.289886	144.374	133.724	342.154	356.332	411.827	260	177.735	188.786	270.947	145	133	358	362	438	263	173	179	257
Acly	NM_134037	104112	chr11	ATP citrate lyase	179	150.021	0.172543	0.163574	0.263204	0.0620391	0.0769274	0.00434576	0.464922	0.378885	0.0563597	154.09	148.438	134.571	165.665	154.634	170.643	135.269	136.858	144.953	0.212455	0.131474	-0.00416567	0.313841	0.223622	0.301718	29110.9	27521.8	25052.1	31230.4	29337.1	30969	24402.4	24719.3	26252	29237	27373	26212	31727	31202	31326	23753	23439	24900
Acot1	NM_012006	26897	chr12	acyl-CoA thioesterase 1	10290	5.17047	-0.16259	1.00571	0.956246	0.474695	3.89618e-06	1.15281e-05	0.887349	0.000363886	0.000506227	3.38447	2.80438	7.04598	6.8695	8.28021	5.21623	3.99685	3.76616	3.01052	-0.0210609	-0.317914	1.01229	0.993863	1.27199	0.54298	225.025	182.99	461.623	455.751	552.863	333.157	253.753	239.402	191.893	226	182	483	463	588	337	247	227	182
Acot11	NM_025590	329910	chr4	acyl-CoA thioesterase 11	9110	2.17129	-0.140157	-0.650389	0.00285926	0.43887	0.000446273	0.987318	0.87376	0.0138245	0.996175	2.05821	2.24905	1.38742	1.63133	1.90831	2.91018	2.72213	2.50371	2.1461	-0.190991	-0.0903419	-0.779774	-0.528681	-0.293833	0.250018	497.843	533.887	330.683	393.738	463.521	676.206	628.731	578.991	497.637	500	531	346	400	493	684	612	549	472
Acpp	NM_207668	56318	chr9	acid phosphatase, prostate	160	156.21	0.121397	0.293558	0.0302523	0.174108	0.000972701	0.735351	0.690114	0.0237761	0.906691	151.912	160.708	159.359	192.262	145.136	150.866	145.951	143.487	156.908	0.0940741	0.148202	0.141892	0.43079	0.0343239	0.0261608	29095	30207.4	30075.5	36743.7	27914.6	27757	26692.3	26273.8	28808.6	29221	30044	31468	37328	29689	28077	25982	24913	27325
Acsbg1	NM_053178	94180	chr9	acyl-CoA synthetase bubblegum family member 1	3409	24.6768	-0.254933	-0.907602	-0.659309	0.0643211	1.2976e-10	2.39042e-06	0.473517	5.59983e-08	0.000134346	27.7713	25.936	15.9956	18.1346	16.1445	24.9931	35.2316	33.2076	31.1671	-0.193389	-0.319066	-1.0102	-0.811116	-0.969555	-0.403332	3288.75	3014.3	1866.57	2142.92	1919.94	2843.23	3984.02	3759.73	3538.22	3303	2998	1953	2177	2042	2876	3878	3565	3356
Acsf2	NM_153807	264895	chr11	acyl-CoA synthetase family member 2	10634	2.14507	-0.0518864	-0.647762	-0.240289	0.789616	0.00123947	0.220195	0.966838	0.0282295	0.571731	2.36436	2.33106	1.6959	1.4085	1.73002	2.44375	2.38226	2.80471	2.37644	-0.0283847	-0.0757689	-0.527091	-0.77564	-0.471365	-0.0386471	309.658	299.621	218.866	184.07	227.524	307.456	297.932	351.189	298.373	311	298	229	187	242	311	290	333	283
Acsl4	NM_207625	50790	chrX	acyl-CoA synthetase long-chain family member 4	1733	26.8101	0.109273	0.192971	0.33224	0.343177	0.0934069	0.00376363	0.835329	0.418549	0.050976	24.7822	26.9962	26.4332	28.3538	26.0664	35.0536	23.0978	23.6978	27.7403	0.0602559	0.156608	0.132058	0.251344	0.139203	0.502491	5274.15	5638.49	5543.34	6021.25	5570.87	7166.39	4693.91	4821.73	5659.46	5297	5608	5800	6117	5925	7249	4569	4572	5368
Acss1	NM_080575	68738	chr2	acyl-CoA synthetase short-chain family member 1	10437	1.96991	-0.908068	-0.249029	-0.301702	2.96794e-06	0.182082	0.106862	0.000662559	0.55898	0.402582	1.19451	1.38269	2.23865	1.82664	1.75201	2.21427	2.80588	2.34466	2.35915	-0.999196	-0.816145	-0.117806	-0.392247	-0.443089	-0.170168	183.206	208.126	338.335	279.552	269.837	326.239	410.935	343.814	346.87	184	207	354	284	287	330	400	326	329
Acta1	NM_009606	11459	chr8	actin, alpha 1, skeletal muscle	10926	4.35451	-4.39628	-3.37282	-1.53832	1.84769e-05	0.000487543	0.0794661	0.00240038	0.0147382	0.349371	0.315083	0.518715	0.613856	1.07698	0.414796	5.81309	5.209	20.8745	1.2703	-4.7219	-4.05625	-3.81478	-3.00132	-4.33762	-0.640849	19.9127	32.1735	38.2174	67.922	26.2954	352.939	314.376	1261.27	76.992	20	32	40	69	28	357	306	1196	73
Acvr1	NM_007394	11477	chr2	activin A receptor, type 1	6604	9.76257	-0.0235073	0.133479	0.510543	0.836291	0.23693	4.51963e-06	0.980046	0.623199	0.000231816	8.35443	8.57879	9.98035	8.88499	11.3018	13.4737	8.7457	8.78078	9.20937	-0.0291052	-0.0179625	0.205994	0.0565245	0.412525	0.601961	989.713	997.394	1165.06	1050.3	1344.52	1533.33	989.33	994.513	1045.86	994	992	1219	1067	1430	1551	963	943	992
Acvr2a	NM_007396	11480	chr2	activin receptor IIA	4985	7.58243	-0.0539408	0.425157	0.057083	0.598653	2.42994e-05	0.57548	0.932554	0.0014901	0.838042	6.36175	7.01905	9.09361	9.52958	6.90517	7.67905	6.73651	7.33468	7.4987	-0.112461	0.00224179	0.381466	0.467107	0.0117914	0.100967	1542.32	1670.03	2172.41	2305.34	1681.13	1788.38	1559.5	1700.05	1742.75	1549	1661	2273	2342	1788	1809	1518	1612	1653
Adam15	NM_009614	11490	chr3	a disintegrin and metallopeptidase domain 15 (metargidin)	2374	36.4328	0.0558158	0.0691298	0.258614	0.559541	0.469505	0.00653052	0.920578	0.79835	0.0745707	36.0569	33.6281	33.2523	37.0164	40.2435	40.6703	37.1421	33.4525	33.5971	0.118247	-0.00941076	-0.0197703	0.153018	0.282771	0.233973	4373.06	4002.65	3974	4479.76	4901.43	4738.38	4301.47	3878.9	3906.17	4392	3981	4158	4551	5213	4793	4187	3678	3705
Adam8	NM_007403	11501	chr7	a disintegrin and metallopeptidase domain 8	10698	2.19209	0.23583	-0.0459586	1.4192	0.314503	0.846378	3.88922e-10	0.81458	0.960899	5.12353e-08	1.93223	1.55592	1.29449	1.57385	2.95881	5.09146	1.69998	1.42993	1.47627	0.394063	0.0560045	-0.202176	0.0962955	1.01284	1.73047	251.909	199.077	166.293	204.744	387.36	637.651	211.632	178.239	184.508	253	198	174	208	412	645	206	169	175
Adamts1	NM_009621	11504	chr16	a disintegrin-like and metallopeptidase (reprolysin type) with thrombospondin type 1 motif, 1	7212	4.82813	0.836134	0.896096	1.28142	3.33879e-05	8.50108e-06	1.64042e-10	0.00389098	0.000669126	2.35976e-08	5.17744	4.55072	4.28506	5.84405	8.31779	4.97117	2.42561	3.05318	2.99128	0.937562	0.724554	0.643697	1.10903	1.62711	0.82107	1079.32	931.036	880.236	1215.67	1741.32	995.522	482.854	608.518	597.788	1084	926	921	1235	1852	1007	470	577	567
Adamts15	NM_001024139	235130	chr9	a disintegrin-like and metallopeptidase (reprolysin type) with thrombospondin type 1 motif, 15	6992	4.09156	0.144448	0.650735	0.240336	0.311672	3.65875e-06	0.090896	0.811899	0.000346888	0.371025	3.80993	3.62855	5.43663	5.12388	4.60409	3.38461	3.30871	3.43604	3.71268	0.192062	0.0947175	0.683345	0.616039	0.471035	-0.0364079	963.825	900.872	1355.25	1293.43	1169.65	822.517	799.273	831.047	900.37	968	896	1418	1314	1244	832	778	788	854
Adamts5	NM_011782	23794	chr16	a disintegrin-like and metallopeptidase (reprolysin type) with thrombospondin type 1 motif, 5 (aggrecanase-2)	4311	6.15889	-0.106045	-0.735195	-0.655673	0.502456	5.39092e-06	4.70271e-05	0.900536	0.000465292	0.00162262	6.2418	8.36267	4.62189	4.79776	3.93908	6.15977	7.41643	7.73168	9.23496	-0.316856	0.0779073	-0.771321	-0.699367	-0.974505	-0.393851	2158.65	2838.35	1575.07	1655.67	1368.02	2046.41	2449.18	2556.41	3061.67	2168	2823	1648	1682	1455	2070	2384	2424	2904
Adamts8	NM_013906	30806	chr9	a disintegrin-like and metallopeptidase (reprolysin type) with thrombospondin type 1 motif, 8	9227	3.36402	0.148313	0.570835	1.01583	0.416305	0.0014687	1.02765e-08	0.862878	0.0319788	1.02888e-06	3.01927	2.1614	3.42923	3.51958	4.85067	4.69426	2.82512	2.41265	2.03645	0.379852	-0.128154	0.541966	0.597509	1.06874	0.957582	467.973	328.779	523.746	544.342	755.003	698.942	418.125	357.522	302.594	470	327	548	553	803	707	407	339	287
Adck4	NM_133770	76889	chr7	aarF domain containing kinase 4	8691	6.5907	0.0764838	0.190541	0.562459	0.610173	0.201224	0.000130622	0.933184	0.580124	0.00368184	6.10465	5.57965	6.83916	5.80538	7.42345	9.1286	6.28545	5.55927	5.37787	0.152608	-0.00391075	0.295051	0.0771083	0.440396	0.674379	570.529	511.768	629.838	541.388	696.703	819.553	560.927	496.733	481.82	573	509	659	550	741	829	546	471	457
Adcy2	NM_153534	210044	chr13	adenylate cyclase 2	5178	9.47744	0.031429	-0.180565	-0.384345	0.775935	0.104469	0.000608803	0.965981	0.439771	0.0125937	10.2835	10.7919	8.26866	9.89743	8.08087	7.83993	10.3753	10.2818	11.371	0.00997605	0.0524901	-0.325667	-0.0483155	-0.331492	-0.439113	1847.99	1903.29	1464.2	1774.78	1458.3	1353.4	1780.38	1766.5	1958.88	1856	1893	1532	1803	1551	1369	1733	1675	1858
Adcyap1	NM_009625	11516	chr17	adenylate cyclase activating polypeptide 1	2119	55.8359	0.132181	0.212008	1.44324	0.277373	0.0807681	1.89715e-33	0.787565	0.388681	1.97857e-30	38.1207	43.7905	42.4032	44.022	86.532	119.021	36.2617	36.5368	43.2274	0.0430816	0.216001	0.175414	0.247564	1.23158	1.62742	3403.26	3836.75	3730.28	3921.63	7757.85	10207.3	3091.26	3118.52	3699.52	3418	3816	3903	3984	8251	10325	3009	2957	3509
Adipor2	NM_197985	68465	chr6	adiponectin receptor 2	2681	23.0943	-0.0480075	0.177244	0.250356	0.589037	0.0444526	0.0044418	0.930699	0.283405	0.057073	20.8827	20.4448	23.8464	24.4225	25.7929	25.4541	21.343	22.568	22.4744	-0.0195054	-0.0771418	0.150678	0.203227	0.29116	0.208074	3531.7	3393.35	3974	4121.46	4380.54	4135.33	3446.72	3648.99	3643.65	3547	3375	4158	4187	4659	4183	3355	3460	3456
Adnp2	NM_175028	240442	chr18	ADNP homeobox 2	7233	5.48818	-0.0706401	0.162348	0.626387	0.580891	0.199536	4.94914e-07	0.926875	0.578421	3.17633e-05	4.84131	4.06418	5.36182	5.1056	7.50708	7.0538	4.73155	5.24013	4.57215	0.062131	-0.217023	0.188081	0.135616	0.700468	0.546708	865.252	712.856	944.277	910.519	1347.35	1211.04	807.491	895.375	783.349	869	709	988	925	1433	1225	786	849	743
Adora2b	NM_007413	11541	chr11	adenosine A2b receptor	11403	2.37299	-0.219691	0.605615	0.79516	0.399955	0.0157966	0.00142847	0.859448	0.15875	0.0251086	1.72079	1.52321	3.106	2.64505	3.01017	3.62254	1.98242	1.37374	2.51565	-0.121185	-0.322617	0.704928	0.492225	0.687059	0.889439	135.413	117.637	240.848	207.695	237.87	273.843	148.966	103.369	189.765	136	117	252	211	253	277	145	98	180
Adra2c	NM_007418	11553	chr5	adrenergic receptor, alpha 2c	7962	5.56305	-0.0818876	-0.481299	-0.412065	0.556743	0.000686703	0.00353392	0.920306	0.0185775	0.0487619	6.18682	5.76523	4.64794	4.40924	4.51418	5.09002	7.48128	6.40967	5.76996	-0.0187202	-0.147459	-0.451962	-0.509812	-0.466765	-0.357744	844.342	772.176	625.057	600.45	618.666	667.307	974.943	836.32	754.885	848	768	654	610	658	675	949	793	716
Afap1l2	NM_146102	226250	chr19	actin filament associated protein 1-like 2	7316	5.48758	-0.597818	-0.31758	-0.252001	4.18709e-05	0.0273566	0.0791527	0.00444022	0.217111	0.349371	4.06446	4.61739	5.45124	5.07783	4.47201	6.70179	6.76154	6.75437	6.88554	-0.677678	-0.520959	-0.275905	-0.360061	-0.533961	-0.0149223	679.058	757.094	897.446	846.536	750.292	1075.6	1078.71	1078.88	1102.8	682	753	939	860	798	1088	1050	1023	1046
Aff1	NM_133919	17355	chr5	AF4/FMR2 family, member 1	4214	6.6349	0.0277131	0.313439	0.570019	0.808027	0.00554746	3.86699e-07	0.971706	0.0808224	2.5606e-05	5.64866	5.60725	6.73403	6.97395	8.99153	7.50436	5.36144	6.25801	5.53638	0.0463481	0.00867453	0.278571	0.347168	0.722819	0.398065	2006.31	1954.57	2356.87	2471.69	3207.13	2560.48	1818.39	2125.06	1885.09	2015	1944	2466	2511	3411	2590	1770	2015	1788
Aff2	NM_008032	14266	chrX	AF4/FMR2 family, member 2	10134	1.89083	0.746968	0.282944	0.224548	3.92656e-05	0.125477	0.225027	0.00434875	0.475286	0.576296	2.40288	2.5259	1.48446	2.08178	1.69219	1.7686	1.52861	1.6422	1.39025	0.722535	0.767394	0.00844506	0.512966	0.224013	0.223724	460.007	474.567	280.025	397.677	325.315	325.25	279.438	300.568	255.148	462	472	293	404	346	329	272	285	242
Aff4	NM_033565	93736	chr11	AF4/FMR2 family, member 4	856	23.3889	0.254182	0.415193	0.359171	0.0128577	4.56471e-05	0.000426213	0.21261	0.0024838	0.00962883	22.8935	23.225	24.7783	26.7226	27.2493	22.6611	18.3706	21.2105	20.4878	0.257299	0.250964	0.350203	0.477291	0.51464	0.184638	9930.98	9887.47	10591.6	11567.1	11870.4	9443.15	7609.5	8796.6	8519.77	9974	9834	11082	11751	12625	9552	7407	8341	8081
Ago1	NA	NA	NA	NA	6531	3.78642	-0.585539	-0.477272	-0.306892	1.05889e-05	0.000304228	0.0193085	0.0016161	0.0102903	0.155454	3.00897	3.21835	3.68719	3.02039	3.2363	4.40727	4.72169	4.99119	4.80113	-0.62047	-0.550572	-0.348719	-0.618122	-0.509446	-0.128261	907.071	952.149	1095.29	908.549	979.711	1276.29	1359.17	1438.51	1387.46	911	947	1146	923	1042	1291	1323	1364	1316
Ago3	NA	NA	NA	NA	8146	2.24464	0.483865	-0.090153	0.262702	0.0017771	0.568103	0.0917183	0.0644358	0.850045	0.37303	2.89089	2.55632	1.54795	2.10723	2.11495	2.6121	1.98121	2.14645	1.92737	0.581748	0.377456	-0.339298	0.123043	0.137472	0.377728	941.92	817.421	496.981	685.106	692.002	817.576	616.406	668.632	602.009	946	813	520	696	736	827	600	634	571
Agpat4	NM_026644	68262	chr17	1-acylglycerol-3-phosphate O-acyltransferase 4 (lysophosphatidic acid acyltransferase, delta)	4835	23.5938	0.0633566	0.0628734	0.411943	0.568048	0.570739	0.000173483	0.922065	0.851643	0.00461945	23.2097	21.0782	21.3596	22.886	25.8223	31.1985	23.1122	20.0836	22.6815	0.143942	-0.0220229	0.00293985	0.120577	0.303824	0.512566	1891.81	1686.12	1715.56	1861.4	2113.63	2442.84	1798.87	1565.07	1772.27	1900	1677	1795	1891	2248	2471	1751	1484	1681
Agpat6	NM_018743	102247	chr8	1-acylglycerol-3-phosphate O-acyltransferase 6 (lysophosphatidic acid acyltransferase, zeta)	1873	32.0263	-0.00445811	0.0815281	0.274114	0.957808	0.331833	0.00103806	0.993791	0.700339	0.0195358	30.3658	28.8946	31.6198	31.2394	35.0958	37.4632	30.6954	30.8364	30.842	0.0440364	-0.0546712	0.0811832	0.0818355	0.25893	0.289072	5110.86	4772.81	5244.19	5246.56	5931.92	6057.18	4933.28	4962	4976.28	5133	4747	5487	5330	6309	6127	4802	4705	4720
Ahr	NM_013464	11622	chr12	aryl-hydrocarbon receptor	6955	4.54384	0.0361004	0.577714	0.617046	0.753442	2.6827e-07	3.74216e-08	0.962338	3.90395e-05	3.2523e-06	3.67773	3.60058	5.52687	5.06161	5.17146	5.82473	3.81788	3.66984	3.54157	0.0646189	0.00702423	0.630495	0.521834	0.561962	0.669476	862.265	828.481	1276.88	1184.17	1217.59	1311.88	854.747	822.609	795.999	866	824	1336	1203	1295	1327	832	780	755
AI597479	NM_133818	98404	chr1	expressed sequence AI597479	6146	8.62347	-0.21355	-0.241002	-0.429943	0.12351	0.0822953	0.00209354	0.61571	0.392047	0.0332496	7.99777	9.24993	8.1458	8.74622	6.25127	8.76859	9.21798	10.6102	11.2195	-0.307671	-0.12505	-0.302453	-0.181825	-0.656721	-0.232933	1179.89	1339.24	1184.17	1287.52	926.117	1242.68	1298.56	1496.51	1586.72	1185	1332	1239	1308	985	1257	1264	1419	1505
Aif1	NM_019467	11629	chr17	allograft inflammatory factor 1	11753	3.76261	-0.081785	-0.770697	-0.887285	0.736891	0.00233235	0.000503148	0.958878	0.0435762	0.0107895	3.8131	5.35008	2.44164	3.22302	2.73307	2.53556	5.07099	4.93343	5.03647	-0.328743	0.130024	-0.98734	-0.572523	-0.799218	-0.969687	142.382	196.06	89.8319	120.091	102.483	90.9501	180.814	176.127	180.289	143	195	94	122	109	92	176	167	171
Aif1l	NM_145144	108897	chr2	allograft inflammatory factor 1-like	7272	7.46596	0.0152903	-0.760877	-0.184937	0.940587	0.00031012	0.370142	0.99025	0.0104332	0.707118	8.58848	8.43854	5.59542	4.34452	4.94815	10.1182	9.53625	8.15818	8.48283	0.0412932	-0.0111434	-0.597348	-0.943726	-0.747213	0.219666	1082.31	1043.64	694.83	546.309	626.176	1224.88	1147.54	982.914	1024.78	1087	1038	727	555	666	1239	1117	932	972
Ak4	NA	NA	NA	NA	10485	1.39341	-0.209202	0.755056	0.340897	0.294174	7.60102e-05	0.078397	0.799957	0.00361699	0.347453	0.849506	1.14518	1.73912	2.14237	1.52929	1.40861	1.075	1.25822	1.24441	-0.423388	-0.0214635	0.585128	0.903363	0.427407	0.245365	186.193	246.332	375.602	468.549	336.601	296.58	224.992	263.658	261.468	187	245	393	476	358	300	219	250	248
Akap1	NM_009648	11640	chr11	A kinase (PRKA) anchor protein 1	7680	5.31337	0.153524	0.0494555	0.324616	0.19146	0.674954	0.00532269	0.715997	0.899614	0.0645775	5.32978	5.28394	4.99027	4.87665	5.80186	6.26053	4.85111	5.1128	4.862	0.1729	0.133408	0.0568493	0.0417631	0.301266	0.346967	846.334	823.454	780.844	772.71	925.183	954.991	735.577	776.204	740.121	850	819	817	785	984	966	716	736	702
Akap11	NM_001164503	219181	chr14	A kinase (PRKA) anchor protein 11	507	35.4036	0.440236	0.26907	0.0860124	2.59152e-06	0.00417883	0.361786	0.000605317	0.0666217	0.701719	40.2064	42.5447	35.6803	37.7132	34.4824	30.6948	28.638	33.2691	32.8136	0.412697	0.467169	0.219183	0.317235	0.197228	-0.0346475	16156	16777.7	14127.9	15121.5	13914.5	11848.4	10988.4	12781	12640	16226	16687	14782	15362	14799	11985	10696	12119	11989
Akap13	NM_029332	75547	chr7	A kinase (PRKA) anchor protein 13	3673	5.23488	0.0678658	0.347599	0.396398	0.510326	0.000670023	0.000102555	0.90157	0.0183086	0.00306318	4.69317	4.64326	5.31824	6.00245	6.23227	5.57559	4.63295	4.78109	4.4257	0.0889199	0.0464353	0.248017	0.440673	0.504053	0.279462	2512.12	2439.19	2805.12	3206.02	3350.05	2866.95	2368.02	2446.72	2270.96	2523	2426	2935	3257	3563	2900	2305	2320	2154
Akap2	NM_009649	11641	chr4	A kinase (PRKA) anchor protein 2	2103	17.4327	0.267265	0.330386	0.414711	0.00358945	0.0003099	5.71666e-06	0.0977599	0.0104332	0.000280376	17.5822	17.2714	17.7833	18.5943	20.2475	18.6476	14.7225	14.6131	15.6581	0.293351	0.240553	0.288524	0.370961	0.503018	0.32027	4990.38	4811.02	4973.71	5266.25	5771.14	5084.39	3990.18	3965.38	4260.41	5012	4785	5204	5350	6138	5143	3884	3760	4041
Akap8l	NM_017476	54194	chr17	A kinase (PRKA) anchor protein 8-like	7327	10.7262	0.48362	0.382086	0.244879	0.000660498	0.00726624	0.0866721	0.0337556	0.0960264	0.362776	12.6344	11.7948	11.3311	11.4241	12.0393	8.76393	9.07689	8.74519	9.32845	0.544822	0.418664	0.366693	0.396576	0.481369	-0.0401868	1117.16	1023.54	987.285	1007.97	1069.05	744.417	766.397	739.296	790.725	1122	1018	1033	1024	1137	753	746	701	750
Akap9	NM_194462	100986	chr5	A kinase (PRKA) anchor protein (yotiao) 9	4371	4.23365	0.304321	0.00560361	-0.101454	0.00185129	0.954705	0.305636	0.0654489	0.989616	0.65207	4.9555	5.05124	4.19638	3.93191	3.91309	3.69749	4.02791	4.09567	4.46449	0.303893	0.304421	0.0428874	-0.0328726	-0.0306036	-0.176318	2559.91	2560.85	2136.1	2026.77	2029.96	1834.85	1986.88	2022.77	2210.86	2571	2547	2235	2059	2159	1856	1934	1918	2097
Akr1c14	NM_134072	105387	chr13	aldo-keto reductase family 1, member C14	11978	1.07392	-0.131954	-1.33286	-1.00987	0.699264	0.000249488	0.00464177	0.951497	0.00894172	0.0585013	1.30735	1.42371	0.827319	0.359266	0.466612	1.04549	1.64979	1.51181	1.4862	-0.179535	-0.0842671	-0.854397	-2.01884	-1.64171	-0.556744	136.409	145.789	85.0717	37.3997	48.8719	104.794	164.375	150.817	148.662	137	145	89	38	52	106	160	143	141
Aldh1a1	NM_013467	11668	chr19	aldehyde dehydrogenase family 1, subfamily A1	8817	6.7706	-0.240861	0.921086	0.484703	0.303998	4.97414e-05	0.0341581	0.808263	0.00260779	0.223231	3.35281	5.56456	10.9949	8.90738	9.27473	5.47106	4.91314	5.68623	5.73261	-0.633548	0.0683623	1.0552	0.769887	0.837318	0.0131549	290.74	473.56	939.501	770.741	807.668	455.743	406.83	471.419	476.544	292	471	983	783	859	461	396	447	452
Alg10b	NM_001033441	380959	chr15	asparagine-linked glycosylation 10 homolog B (yeast, alpha-1,2-glucosyltransferase)	5369	10.5078	0.360843	0.490422	0.206065	0.00715108	0.000243484	0.125896	0.152708	0.0089026	0.439128	10.5548	11.5622	10.9768	13.1737	11.0023	8.97451	7.90757	9.91091	8.92698	0.307411	0.411789	0.342717	0.623895	0.373361	0.0156663	1678.73	1804.76	1720.34	2090.75	1757.3	1371.19	1200.96	1507.05	1361.1	1686	1795	1800	2124	1869	1387	1169	1429	1291
Alkbh5	NM_172943	268420	chr11	alkB, alkylation repair homolog 5 (E. coli)	2964	13.7792	-0.0167329	0.352986	0.38044	0.869555	0.000461357	0.000158419	0.982172	0.0142214	0.00427288	11.8964	11.6986	15.5833	14.8825	16.9582	14.3171	12.3272	12.5705	12.1906	0.00865742	-0.042593	0.376803	0.328543	0.526063	0.217866	3058.75	2951.96	3948.2	3818.28	4378.66	3536.24	3026.54	3090.04	3004.75	3072	2936	4131	3879	4657	3577	2946	2930	2850
Alpl	NM_007431	11647	chr4	alkaline phosphatase, liver/bone/kidney	10051	3.38837	0.0892444	-1.00064	0.00783985	0.738311	0.000342109	0.976636	0.959199	0.0111795	0.992739	3.93795	4.01381	1.57583	2.15224	2.19919	5.45558	4.07529	3.69708	3.83916	0.0888553	0.0893051	-1.24858	-0.783033	-0.743013	0.500358	424.162	424.295	167.247	231.322	237.857	564.496	419.155	380.725	396.42	426	422	175	235	253	571	408	361	376
Amigo3	NM_177275	320844	chr9	adhesion molecule with Ig like domain 3	2890	32.8179	0.0403149	-0.138795	-0.361466	0.668322	0.142314	0.000150193	0.94852	0.503692	0.00412206	36.9475	34.6743	29.878	33.3241	27.0904	27.6051	36.9191	36.105	35.2165	0.0984129	-0.0202441	-0.22912	-0.0535725	-0.343076	-0.379936	4009.63	3692.97	3195.06	3608.61	2952.33	2877.83	3825.81	3746.02	3663.68	4027	3673	3343	3666	3140	2911	3724	3552	3475
Amotl2	NM_019764	56332	chr9	angiomotin-like 2	7944	4.24676	0.556673	-0.0403759	-0.211675	4.00238e-05	0.770549	0.129213	0.00437646	0.940783	0.444987	6.12386	5.49904	3.96968	3.71201	3.11481	3.78619	3.76569	4.00284	4.51353	0.64412	0.46196	-0.00178987	-0.0803755	-0.323859	-0.106624	1095.26	965.22	699.606	662.463	559.43	650.502	643.118	684.455	773.853	1100	960	732	673	595	658	626	649	734
Angpt2	NM_007426	11601	chr8	angiopoietin 2	6062	9.11618	0.0450275	1.62191	0.620264	0.842218	2.74087e-13	0.00545261	0.980921	2.01777e-10	0.0655518	5.55771	5.76567	15.1946	18.5317	11.5184	5.35144	5.64412	5.36581	6.03746	0.0319694	0.057859	1.46066	1.7651	1.08855	-0.0804095	844.342	859.649	2274.68	2809.32	1757.31	780.994	818.791	779.372	879.285	848	855	2380	2854	1869	790	797	739	834
Angptl2	NM_011923	26360	chr2	angiopoietin-like 2	8500	4.39567	-0.0754671	-0.353875	0.574238	0.597269	0.014439	3.63093e-05	0.932444	0.149342	0.00130578	4.10544	3.71533	3.36565	3.08079	5.52316	6.89011	4.00417	4.48076	4.32516	0.00734087	-0.16348	-0.299979	-0.409214	0.440744	0.695476	603.386	535.899	487.43	451.813	815.172	972.787	561.958	629.612	609.387	606	533	510	459	867	984	547	597	578
Angptl4	NM_020581	57875	chr17	angiopoietin-like 4	7347	11.6797	-1.10371	1.5417	0.987142	0.000240338	4.74253e-08	0.000477382	0.0166636	1.00598e-05	0.0103364	2.97932	3.91072	15.8726	27.0881	20.5101	8.79457	7.7898	6.49277	8.69429	-1.29469	-0.930644	1.09274	1.88151	1.4896	0.205138	241.951	311.685	1270.18	2195.09	1672.69	686.087	604.077	504.12	676.857	243	310	1329	2230	1779	694	588	478	642
Angptl7	NM_001039554	654812	chr4	angiopoietin-like 7	11195	2.49655	-0.585773	0.244956	-1.33338	0.0466886	0.389475	1.36599e-05	0.406051	0.745873	0.000576936	2.21777	1.6183	3.65941	3.17256	1.42576	0.86544	3.74128	3.27184	1.94973	-0.363542	-0.84233	0.334885	0.147663	-0.990722	-1.76695	195.155	139.757	317.307	278.568	125.999	73.1536	314.362	275.257	164.488	196	139	332	283	134	74	306	261	156
Ankrd11	NR_037865	77087	chr8	ankyrin repeat domain 11	1572	16.715	0.231716	0.198546	0.257186	0.0161858	0.0394588	0.00755128	0.238032	0.265641	0.0831904	17.8589	16.4829	15.9607	17.573	18.6423	16.5711	15.7482	14.883	14.8238	0.301287	0.158558	0.117967	0.274896	0.3693	0.135395	6718.9	6085.91	5917.04	6597.09	7043.28	5988.96	5657.55	5353.26	5346.34	6748	6053	6191	6702	7491	6058	5507	5076	5071
Ankrd13a	NM_026718	68420	chr5	ankyrin repeat domain 13a	4845	13.96	-0.154684	-0.0785007	0.488739	0.14317	0.455717	2.24269e-06	0.655606	0.790211	0.000127578	11.9314	11.1618	12.3774	11.956	17.1227	19.3175	14.4195	13.3934	12.1408	-0.0942606	-0.217454	-0.0625666	-0.0943987	0.432698	0.542625	1655.83	1520.22	1692.63	1655.67	2386.3	2575.31	1910.85	1777.04	1615.19	1663	1512	1771	1682	2538	2605	1860	1685	1532
Ankrd27	NM_178263	245886	chr7	ankyrin repeat domain 27 (VPS9 domain)	2514	49.0738	-0.0595694	-0.161622	-0.254163	0.515322	0.0784061	0.00579716	0.904369	0.382502	0.0684447	52.6873	48.5985	48.8965	45.441	42.708	46.6681	55.0222	52.5687	56.4593	0.0104356	-0.133152	-0.118487	-0.206083	-0.286357	-0.222474	4337.21	3926.23	3966.36	3732.64	3530.57	3690.46	4325.1	4137.29	4455.46	4356	3905	4150	3792	3755	3733	4210	3923	4226
Ankrd28	NM_001024604	105522	chr14	ankyrin repeat domain 28	5997	6.2048	-0.145456	0.699646	0.223363	0.389339	2.31404e-05	0.180985	0.855757	0.00144801	0.525285	4.45309	5.05019	7.75856	9.2791	7.5608	4.74098	5.29867	5.49701	5.52491	-0.224557	-0.0702528	0.554584	0.830755	0.544662	-0.192163	993.695	1105.98	1706.01	2066.14	1694.31	1016.28	1129.05	1172.74	1181.87	998	1100	1785	2099	1802	1028	1099	1112	1121
Ankrd29	NA	NA	NA	NA	3815	18.8573	0.0216757	-0.064711	-0.284164	0.832502	0.528728	0.00605677	0.97877	0.830215	0.0705121	20.2578	19.4944	19.4822	17.9404	16.6233	15.7905	18.9778	22.2922	19.5818	0.0622429	-0.0202178	-0.0152801	-0.116063	-0.216839	-0.354949	2814.81	2658.38	2667.49	2487.44	2319.55	2107.7	2518.01	2961.38	2608.33	2827	2644	2791	2527	2467	2132	2451	2808	2474
Ankrd55	NM_029898	77318	chr13	ankyrin repeat domain 55	8479	9.61575	-0.0842607	-0.324442	-0.451169	0.549785	0.0226234	0.00163224	0.918772	0.195668	0.0277171	10.6013	9.98225	9.11458	8.30451	6.95135	9.206	11.5361	11.23	11.1466	-0.0284309	-0.142147	-0.267292	-0.383252	-0.630199	-0.28957	703.951	650.518	596.385	550.248	463.524	587.231	731.467	712.929	709.546	707	647	624	559	493	594	712	676	673
Anln	NM_028390	68743	chr9	anillin, actin binding protein	9471	1.90013	-0.152331	-0.584193	-0.607799	0.370819	0.000768064	0.000471709	0.84903	0.020194	0.0102847	1.73881	2.51095	1.56803	1.57347	1.46913	1.65485	2.316	2.36983	2.63847	-0.424735	0.0772656	-0.594677	-0.571614	-0.661183	-0.553751	402.257	570.083	357.446	363.223	341.297	367.76	511.618	524.153	585.135	404	567	374	369	363	372	498	497	555
Ano3	NM_001128103	228432	chr2	anoctamin 3	432	60.3988	0.130529	0.132511	-0.320639	0.200488	0.193679	0.00188618	0.724488	0.572348	0.0308189	64.0601	68.3233	59.6375	72.6852	49.3226	48.2708	55.9902	64.9009	66.9132	0.097198	0.163066	-0.0272305	0.276312	-0.273874	-0.368994	16473.6	17243.2	15112.3	18651.4	12737.3	11924.5	13748.9	15956.4	16495.5	16545	17150	15812	18948	13547	12062	13383	15130	15646
Ano6	NM_175344	105722	chr15	anoctamin 6	2461	17.5985	0.0670394	0.252262	0.403868	0.452703	0.00447929	4.91826e-06	0.879078	0.0700553	0.000247197	15.7804	16.2879	18.6194	17.8076	20.7278	20.0933	16.3639	15.1075	16.0797	0.0577293	0.0763081	0.27512	0.228934	0.457148	0.34829	3803.52	3852.84	4422.25	4282.89	5017.08	4652.37	3766.22	3481.31	3715.34	3820	3832	4627	4351	5336	4706	3666	3301	3524
Antxr1	NM_054041	69538	chr6	anthrax toxin receptor 1	6879	4.58852	-0.020157	-0.695233	-0.354149	0.872584	7.87924e-08	0.00540899	0.982172	1.38885e-05	0.0652153	5.09277	5.56388	3.55773	3.10906	3.75943	4.78734	5.22034	5.6176	5.94348	-0.0713178	0.0291591	-0.609473	-0.785597	-0.502748	-0.218357	1144.04	1226.63	787.536	696.915	848.08	1033.09	1119.8	1206.49	1279.92	1149	1220	824	708	902	1045	1090	1144	1214
Anxa4	NM_013471	11746	chr6	annexin A4	5952	16.0452	-0.445165	-0.291097	-0.421789	0.00013862	0.0120352	0.000296492	0.0109799	0.13294	0.00723592	13.6054	14.2746	15.5227	15.4645	13.4618	15.1458	18.7162	22.1709	18.0773	-0.46616	-0.424003	-0.297333	-0.284641	-0.47539	-0.369448	1162.96	1197.48	1307.46	1319.02	1155.54	1243.66	1527.66	1811.84	1481.29	1168	1191	1368	1340	1229	1258	1487	1718	1405
Ap3d1	NM_007460	11776	chr10	adaptor-related protein complex 3, delta 1 subunit	1151	40.112	0.241063	0.0992349	0.248001	0.00727909	0.270785	0.0057406	0.153622	0.6564	0.0679051	44.7548	39.9791	36.1918	40.5531	42.0983	43.8461	37.8963	35.5763	37.9706	0.332836	0.142984	0.00526862	0.18751	0.250646	0.245304	9033.87	7919.83	7198.7	8168.1	8533.54	8502	7304.38	6865.59	7347.39	9073	7877	7532	8298	9076	8600	7110	6510	6969
Apc2	NM_011789	23805	chr10	adenomatosis polyposis coli 2	1994	13.2159	0.343845	0.0150544	0.14306	0.00269402	0.896268	0.213818	0.0822334	0.972564	0.564689	16.8934	13.5432	11.7573	12.4751	13.5401	13.1845	13.3723	10.9617	12.9624	0.506408	0.160495	-0.0376287	0.0659644	0.193319	0.0909196	6541.66	5146.83	4486.28	4820.34	5265.3	4904.47	4944.58	4058.19	4811.81	6570	5119	4694	4897	5600	4961	4813	3848	4564
Apcdd1	NM_133237	494504	chr18	adenomatosis polyposis coli down-regulated 1	10305	2.73305	-0.0720748	-0.510861	0.0193935	0.690458	0.00576939	0.914144	0.951489	0.0830885	0.969371	2.64245	2.91615	2.38729	1.70954	2.95509	3.0155	3.09844	3.13991	2.83587	-0.130339	-0.015575	-0.297493	-0.759239	0.0365515	0.00183136	315.632	341.849	280.992	203.756	354.463	346.011	353.406	358.574	324.73	317	340	294	207	377	350	344	340	308
Apobec3	NM_030255	80287	chr15	apolipoprotein B mRNA editing enzyme, catalytic polypeptide 3	11949	1.19482	-1.03422	-0.25019	0.104859	0.00367563	0.462504	0.754601	0.0993532	0.794354	0.91264	0.607256	0.673634	1.29399	0.911854	1.30264	1.5495	1.12777	2.09187	0.859396	-1.08649	-0.965706	-0.0279558	-0.510574	0.00859479	0.193743	63.7235	69.3755	133.807	95.4783	137.266	156.199	113.013	209.85	86.4708	64	69	140	97	146	158	110	199	82
Apoc1	NM_007469	11812	chr7	apolipoprotein C-I	12404	1.86573	-0.761932	-0.937676	-1.2137	0.0378925	0.0114638	0.00136943	0.36775	0.128741	0.0243443	1.34769	2.16668	1.72306	1.37694	0.990061	1.61059	2.95795	2.75285	3.53543	-1.10559	-0.463807	-0.781378	-1.07862	-1.52968	-0.912023	31.8609	50.2714	40.1412	32.4809	23.4916	36.5793	66.7802	62.2317	80.1249	32	50	42	33	25	37	65	59	76
Apod	NM_007470	11815	chr16	apolipoprotein D	138	418.112	-0.430614	0.146313	0.307015	3.34129e-05	0.152287	0.00258459	0.00389098	0.51931	0.0388343	256.2	342.399	423.044	467.558	492.607	513.015	410.672	439.402	401.699	-0.63948	-0.248165	0.0628023	0.225253	0.309737	0.30427	20357.8	26701.4	33124.4	37072.4	39308.3	39159.6	31160.2	33380.9	30598.8	20446	26557	34658	37662	41807	39611	30331	31652	29023
Apol8	NA	NA	NA	NA	11832	1.69018	-0.0524005	-0.646992	-0.655901	0.818299	0.00623934	0.00556881	0.974973	0.0871487	0.0664685	2.11993	1.85471	1.34785	1.28282	1.30111	1.33828	2.1672	2.10953	2.13126	0.0528802	-0.16559	-0.616611	-0.669299	-0.640022	-0.663125	166.28	142.773	104.173	100.402	102.481	100.837	162.322	158.198	160.258	167	142	109	102	109	102	158	150	152
Apoo	NM_026673	68316	chrX	apolipoprotein O	8174	17.8742	-0.108193	-0.0283976	-0.393841	0.425287	0.833456	0.00415019	0.868407	0.95993	0.0546985	16.55	19.4241	20.1397	17.8259	14.7772	14.9609	18.4296	20.8865	20.8799	-0.213556	-0.00990269	0.0480594	-0.10968	-0.370683	-0.416797	651.179	750.056	780.845	699.868	583.88	565.481	692.43	785.696	787.562	654	746	817	711	621	572	674	745	747
Aqp4	NM_009700	11829	chr18	aquaporin 4	7070	4.5256	-0.104782	-0.417015	-0.475584	0.425532	0.00173543	0.00036668	0.868492	0.0354336	0.00857758	4.59109	5.24823	4.25759	3.65707	3.93724	3.72502	4.80703	5.98155	5.63908	-0.190067	-0.0243064	-0.319959	-0.520956	-0.405408	-0.549194	995.687	1117.04	909.872	791.412	857.489	776.053	995.496	1240.24	1172.38	1000	1111	952	804	912	785	969	1176	1112
Ar	NM_013476	11835	chrX	androgen receptor	9993	2.99571	0.573561	0.117609	-0.0596976	0.00191432	0.531242	0.752465	0.0666708	0.831597	0.911891	4.34896	3.37808	2.44029	3.19107	2.61902	2.4043	2.77412	2.80984	2.49207	0.754427	0.36369	-0.0983701	0.30563	0.0305438	-0.1563	556.589	424.295	307.743	407.52	336.601	295.591	339.023	343.809	305.753	559	422	322	414	358	299	330	326	290
Arap1	NM_198096	69710	chr7	ArfGAP with RhoGAP domain, ankyrin repeat and PH domain 1	5687	6.01102	-0.13987	-0.645642	0.305999	0.379827	6.92899e-05	0.0515898	0.850546	0.00337418	0.280472	5.92391	5.4372	4.34546	3.65531	5.87866	9.82463	6.86745	6.15554	6.43291	-0.0664129	-0.217069	-0.534308	-0.765476	-0.0714043	0.605128	1475.61	1329.19	1066.62	908.549	1470.51	2350.9	1633.47	1465.93	1536.11	1482	1322	1116	923	1564	2378	1590	1390	1457
Arfgef2	NM_001085495	99371	chr2	ADP-ribosylation factor guanine nucleotide-exchange factor 2 (brefeldin A-inhibited)	782	28.5883	0.330365	0.201478	0.169747	0.000282431	0.0271978	0.0629474	0.0188012	0.216389	0.31003	32.4296	30.2902	26.636	30.665	29.1447	27.4183	25.2166	26.9062	25.4014	0.391724	0.266194	0.0865876	0.307898	0.243737	0.09163	12145.4	11133.2	9829.88	11459.8	10961.2	9864.3	9017.98	9633.97	9119.66	12198	11073	10285	11642	11658	9978	8778	9135	8650
Arhgap15	NM_153820	76117	chr2	Rho GTPase activating protein 15	9185	4.39985	-0.16211	-0.211091	-0.574697	0.312667	0.189068	0.000447	0.81314	0.567608	0.00986631	3.82115	5.25431	4.46841	4.28299	3.10468	3.77656	5.20391	5.28682	5.26125	-0.39359	0.0379656	-0.189509	-0.232443	-0.686351	-0.468294	432.127	583.153	497.942	483.312	352.579	410.271	561.957	571.609	570.379	434	580	521	491	375	415	547	542	541
Arhgap20	NM_175535	244867	chr9	Rho GTPase activating protein 20	6569	4.30577	0.239561	0.372881	0.0110647	0.0532652	0.00249425	0.929389	0.435127	0.0454374	0.975862	4.54246	4.45506	4.41061	5.44482	3.94391	3.79692	3.64853	4.20389	3.98882	0.266515	0.211452	0.202833	0.524621	0.0689182	-0.0497927	1233.66	1187.42	1180.34	1475.54	1075.62	990.58	946.182	1091.53	1038.49	1239	1181	1235	1499	1144	1002	921	1035	985
Arhgap22	NM_153800	239027	chr14	Rho GTPase activating protein 22	7039	9.2662	0.0819008	-0.0264502	0.426215	0.499004	0.827753	0.000359933	0.899939	0.958038	0.00846721	9.30402	8.32567	8.84451	7.50957	11.0121	11.5843	9.10231	8.44713	8.34247	0.172403	-0.0147682	0.0781947	-0.139499	0.42142	0.430468	1031.53	905.9	966.261	830.786	1226.06	1233.78	963.644	895.379	886.669	1036	901	1011	844	1304	1248	938	849	841
Arhgap23	NM_021493	58996	chr11	Rho GTPase activating protein 23	4788	8.44505	0.124492	0.0927522	0.411794	0.257574	0.39912	0.000156513	0.770629	0.754415	0.00423059	8.58357	7.58526	8.09451	7.71946	10.6035	9.27446	8.0351	7.66453	7.35785	0.22346	0.0181123	0.11765	0.0673508	0.534297	0.27717	1996.35	1731.36	1855.11	1791.51	2476.57	2072.11	1784.49	1704.27	1640.49	2005	1722	1941	1820	2634	2096	1737	1616	1556
Arhgap24	NM_146161	231532	chr5	Rho GTPase activating protein 24	5662	11.0385	-0.0286783	-0.137112	-0.379422	0.810744	0.253811	0.00176135	0.972513	0.639528	0.029352	11.318	12.27	10.6574	11.1913	10.3017	8.29348	12.2535	12.0223	13.0901	-0.0740434	0.015327	-0.181977	-0.0933911	-0.203619	-0.58017	1522.41	1619.76	1412.59	1502.11	1391.55	1071.65	1573.88	1546.08	1687.93	1529	1611	1478	1526	1480	1084	1532	1466	1601
Arhgap25	NM_175476	232201	chr6	Rho GTPase activating protein 25	10541	2.1051	0.44355	0.214945	0.73724	0.031721	0.301848	0.000303963	0.335287	0.675553	0.00737227	2.20426	2.16104	2.22824	1.49711	2.90705	2.47888	1.49048	1.87377	1.62315	0.469289	0.413821	0.4637	-0.0898001	0.873518	0.580391	316.628	304.648	315.4	214.584	419.343	342.055	204.445	257.327	223.516	318	303	330	218	446	346	199	244	212
Arhgap29	NM_172525	214137	chr3	Rho GTPase activating protein 29	7903	3.55663	-0.551097	0.339936	-0.0217129	0.000850291	0.0329815	0.892918	0.0390332	0.241411	0.963086	2.09483	2.80629	4.05443	5.00921	3.55605	3.56756	3.16993	4.19472	3.7771	-0.760802	-0.366803	0.16912	0.492002	0.00740933	-0.0518752	455.028	598.235	867.813	1085.73	775.688	744.418	657.502	871.116	786.509	457	595	908	1103	825	753	640	826	746
Arhgap33	NA	NA	NA	NA	8834	3.09501	-0.0546808	0.0987207	0.435747	0.743064	0.55099	0.0077242	0.959838	0.84296	0.0847225	3.02998	2.29748	3.32693	2.60447	3.67317	3.8901	3.15421	2.78372	2.67043	0.142531	-0.282934	0.255995	-0.078491	0.425869	0.444604	571.525	425.301	618.37	490.202	695.767	704.874	568.118	502.006	482.875	574	423	647	498	740	713	553	476	458
Arhgef12	NM_027144	69632	chr9	Rho guanine nucleotide exchange factor (GEF) 12	849	22.7244	0.154683	0.146619	0.299347	0.071049	0.0870656	0.000455325	0.496078	0.403585	0.00998995	23.3252	21.6755	21.4185	23.2946	25.7321	24.4213	20.4804	21.4474	20.8988	0.219569	0.0866765	0.0753205	0.21456	0.367313	0.227871	10434.8	9516.46	9441.84	10398.6	11560.2	10495	8748.82	9173.1	8962.57	10480	9465	9879	10564	12295	10616	8516	8698	8501
Arhgef19	NM_172520	213649	chr4	Rho guanine nucleotide exchange factor (GEF) 19	10580	1.98779	0.183367	0.211493	0.775545	0.410221	0.341026	0.000372157	0.85956	0.706101	0.00867328	1.62094	2.04944	1.98711	1.74884	2.62864	2.95319	1.20971	1.70449	2.10146	0.0188877	0.32903	0.290446	0.124901	0.720072	0.823765	234.981	291.577	283.856	252.975	382.668	411.259	167.464	236.239	292.033	236	290	297	257	407	416	163	224	277
Arhgef26	NA	NA	NA	NA	8731	2.69349	-0.453693	0.733574	0.536927	0.00234904	1.96309e-07	0.000154266	0.0759121	3.0331e-05	0.00418794	1.50167	1.74804	3.86005	3.53068	3.04332	3.47484	2.1893	2.20001	2.5202	-0.551719	-0.360158	0.786493	0.676072	0.471236	0.598339	333.555	381.061	844.88	782.553	678.841	741.453	464.36	467.204	536.637	335	379	884	795	722	750	452	443	509
Arhgef3	NM_027871	71704	chr14	Rho guanine nucleotide exchange factor (GEF) 3	5898	8.72777	-0.00575222	-0.122499	-0.317878	0.957652	0.259919	0.00374201	0.993791	0.644845	0.0507381	9.6516	8.76094	8.87211	8.10528	7.50693	7.45303	10.1418	9.33049	9.26159	0.0751988	-0.0914469	-0.0674254	-0.179642	-0.281009	-0.355369	1555.26	1385.49	1408.77	1303.27	1214.78	1153.7	1560.53	1437.45	1430.69	1562	1378	1474	1324	1292	1167	1519	1363	1357
Arid1a	NM_001080819	93760	chr4	AT rich interactive domain 1A (SWI-like)	3454	8.53504	0.335335	0.0261949	0.233652	0.000373433	0.782934	0.0133675	0.0225774	0.944151	0.123922	9.94638	9.18277	7.93465	7.4989	9.18383	8.79068	7.75292	7.99021	7.82126	0.404584	0.262306	0.0574618	-0.00588462	0.295621	0.168512	3469.97	3144	2727.71	2610.48	3217.47	2946.04	2582.73	2665.03	2615.71	3485	3127	2854	2652	3422	2980	2514	2527	2481
Arid1b	NM_001085355	239985	chr17	AT rich interactive domain 1B (SWI-like)	3954	5.21551	0.295895	0.0829031	0.163917	0.00345987	0.41547	0.10643	0.0949567	0.7643	0.402285	6.09205	5.40338	5.05736	4.85792	5.5387	5.03388	4.80843	4.93239	4.81521	0.392318	0.192247	0.102655	0.062744	0.261065	0.0592415	2944.25	2562.86	2408.48	2342.74	2688.12	2337.06	2219.05	2279.04	2230.89	2957	2549	2520	2380	2859	2364	2160	2161	2116
Arid3b	NM_019689	56380	chr9	AT rich interactive domain 3B (BRIGHT-like)	11508	1.0376	-0.68576	-0.520557	-0.392583	0.00188559	0.0168305	0.0690696	0.0662869	0.16388	0.327799	0.873946	0.791571	0.983222	0.88415	1.06487	0.99235	1.46969	1.24096	1.45478	-0.600352	-0.768981	-0.452619	-0.58683	-0.311084	-0.475852	141.387	125.68	156.741	142.728	173	154.221	227.043	191.95	225.622	142	125	164	145	184	156	221	182	214
Arid4a	NM_001081195	238247	chr12	AT rich interactive domain 4A (RBP1-like)	7683	3.30637	-0.405418	-0.276225	-0.315294	0.00148844	0.0291695	0.0129377	0.0564481	0.224512	0.121924	2.93062	2.91155	3.05137	3.33142	2.81649	3.47128	3.87759	4.06068	4.08419	-0.386949	-0.423393	-0.349983	-0.205365	-0.43812	-0.200875	722.869	704.812	741.656	819.96	697.644	822.519	913.307	957.6	965.739	726	701	776	833	742	832	889	908	916
Arid5a	NR_033310	214855	chr1	AT rich interactive domain 5A (MRF1-like)	7745	3.47759	0.00367772	1.12931	1.7693	0.981437	1.11899e-13	1.00555e-31	0.998327	9.33614e-11	7.86526e-29	2.05372	1.58277	3.98152	3.95772	6.97119	5.48152	1.93193	1.86037	1.85035	0.19058	-0.211369	1.12307	1.13253	1.95782	1.54723	507.801	384.078	970.082	976.47	1730.97	1301.99	456.14	439.782	438.592	510	382	1015	992	1841	1317	444	417	416
Arid5b	NM_023598	71371	chr10	AT rich interactive domain 5B (MRF1-like)	8199	3.80402	0.227101	0.620274	0.750441	0.185074	0.000246611	8.59339e-06	0.706226	0.0089026	0.000394397	3.45254	3.08765	3.63122	4.94828	5.36533	4.08899	3.07422	2.7839	2.82717	0.31769	0.129769	0.369164	0.833192	0.959002	0.50356	662.132	581.143	686.219	946.942	1033.32	753.314	562.982	510.443	519.773	665	578	718	962	1099	762	548	484	493
Arih2	NM_011790	23807	chr9	ariadne homolog 2 (Drosophila)	4165	14.128	0.104342	0.389424	0.173882	0.429907	0.00299224	0.187281	0.871384	0.0521559	0.532446	13.0368	13.7566	16.0307	16.5754	16.3416	11.9009	11.6897	13.692	13.3291	0.0788071	0.129238	0.355704	0.422002	0.410707	-0.11057	2182.55	2260.22	2644.55	2768.97	2747.36	1913.94	1868.73	2191.51	2139.17	2192	2248	2767	2813	2922	1936	1819	2078	2029
Arl14ep	NA	NA	NA	NA	6225	9.04265	-0.172657	-0.305263	-0.200399	0.115548	0.00562667	0.0677629	0.598794	0.0815965	0.323926	8.70924	9.13037	8.12859	8.12565	7.97442	9.71118	10.1446	10.4172	10.6703	-0.193224	-0.152209	-0.313895	-0.296312	-0.314216	-0.0941506	1212.75	1247.75	1115.36	1129.04	1115.11	1299.03	1348.9	1386.83	1424.36	1218	1241	1167	1147	1186	1314	1313	1315	1351
Armcx5	NM_001009575	494468	chrX	armadillo repeat containing, X-linked 5	6372	10.0833	0.0824521	0.467242	0.127091	0.640836	0.00756873	0.471232	0.941295	0.0990823	0.776167	8.61727	10.3712	12.0159	12.7285	11.9798	7.65133	7.84715	9.45532	10.5312	-0.0426719	0.197317	0.415361	0.516531	0.43833	-0.271904	1038.5	1226.63	1426.93	1530.66	1449.84	885.787	903.036	1089.43	1216.66	1043	1220	1493	1555	1542	896	879	1033	1154
Arntl	NM_007489	11865	chr7	aryl hydrocarbon receptor nuclear translocator-like	11447	1.55667	0.426375	1.15709	0.660474	0.175338	0.000177012	0.0342027	0.692227	0.00705019	0.22329	1.3399	1.28785	1.88358	2.47217	1.96915	1.12782	1.4218	0.951109	0.664668	0.465591	0.381874	0.933265	1.34219	1.02439	0.161058	166.279	156.849	230.327	306.132	245.41	134.447	168.477	112.852	79.0899	167	156	241	311	261	136	164	107	75
Arpc1b	NM_023142	11867	chr5	actin related protein 2/3 complex, subunit 1B	947	142.207	0.0421937	0.0616501	0.297737	0.664451	0.525928	0.00207242	0.947762	0.828653	0.0330529	141.857	125.621	137.863	133.181	154.922	167.548	151.233	125.428	127.179	0.139869	-0.0625379	0.0774456	0.0457243	0.273045	0.322044	9389.33	8160.13	8991.69	8796.12	10297.4	10653.2	9558.35	7937.09	8069.59	9430	8116	9408	8936	10952	10776	9304	7526	7654
Arpc2	NM_029711	76709	chr1	actin related protein 2/3 complex, subunit 2	853	148.22	0.0485763	0.134103	0.219975	0.531721	0.0834866	0.00443869	0.913153	0.395533	0.057073	136.134	146.175	151.439	147.757	155.021	165.712	138.462	145.058	140.411	0.0102828	0.085863	0.14275	0.125352	0.203774	0.235959	9277.81	9776.87	10170.1	10048.2	10609.6	10848.9	9010.79	9451.52	9173.43	9318	9724	10641	10208	11284	10974	8771	8962	8701
Arrb1	NM_178220	109689	chr7	arrestin, beta 1	430	52.505	0.139752	0.0178524	0.365421	0.0910137	0.829542	8.96369e-06	0.544702	0.958751	0.000404984	55.0018	48.8264	46.2096	49.154	58.5421	64.082	48.9848	49.2397	48.2741	0.235753	0.0368695	-0.0367451	0.070482	0.331824	0.398235	16636.9	14494.4	13773.3	14836.1	17782.6	18620.4	14148.5	14239.5	13997.9	16709	14416	14411	15072	18913	18835	13772	13502	13277
Art3	NM_181728	109979	chr5	ADP-ribosyltransferase 3	4194	34.357	-0.238392	-0.185382	-0.393326	0.0331058	0.0966841	0.000470145	0.342179	0.425227	0.0102685	31.0793	35.0348	37.2984	31.2206	27.1334	32.8481	42.5182	37.7231	40.8583	-0.312929	-0.167241	-0.0711081	-0.309502	-0.502641	-0.291032	2073.02	2293.4	2451.5	2077.95	1817.46	2104.74	2708.06	2405.6	2612.55	2082	2281	2565	2111	1933	2129	2636	2281	2478
Art4	NM_026639	109978	chr6	ADP-ribosyltransferase 4	12013	1.07699	-0.201788	-1.12958	-0.673836	0.479926	0.000185425	0.0214553	0.889254	0.0072746	0.166262	1.06677	1.38965	0.69595	0.591474	0.66261	1.13294	1.3959	1.68061	1.30803	-0.386902	-0.0353659	-1.01704	-1.23032	-1.06023	-0.358266	108.529	138.75	69.7684	60.0429	67.6812	110.725	135.612	163.465	127.579	109	138	73	61	72	112	132	155	121
Arxes1	NA	NA	NA	NA	8754	8.77211	-0.0355299	0.0808547	0.377657	0.796463	0.554325	0.00513297	0.969435	0.845816	0.0631032	7.50165	8.22004	8.96174	8.06132	10.1923	10.9282	8.37703	7.93461	8.71008	-0.0887102	0.015951	0.146201	0.0117915	0.358795	0.395309	505.809	543.942	595.43	542.373	690.125	707.84	539.355	511.498	562.997	508	541	623	551	734	716	525	485	534
Asap2	NM_001135192	211914	chr12	ArfGAP with SH3 domain, ankyrin repeat and PH domain 2	6762	4.57519	0.153287	0.449648	0.309508	0.24897	0.00063213	0.0191382	0.762977	0.0174638	0.154925	4.18081	4.38219	5.48359	5.02273	5.40948	4.18085	3.77052	4.17137	4.01797	0.132557	0.173308	0.50234	0.393895	0.510021	0.0746769	1011.62	1040.63	1307.46	1212.71	1314.45	971.796	871.186	964.981	932.002	1016	1035	1368	1232	1398	983	848	915	884
Ascc3	NM_198007	77987	chr10	activating signal cointegrator 1 complex subunit 3	7584	2.73889	0.395546	0.200135	0.364373	0.00190521	0.118571	0.00423404	0.0666708	0.463785	0.0555147	2.9395	3.04058	2.51081	2.70516	2.67608	3.23817	2.22875	2.57209	2.26107	0.384142	0.405816	0.135777	0.261308	0.254904	0.465719	937.937	952.149	789.444	861.302	857.483	992.559	679.074	784.639	691.624	942	947	826	875	912	1004	661	744	656
Aspa	NM_023113	11484	chr11	aspartoacylase	6986	15.0904	-0.115654	-1.91094	-0.653596	0.70412	5.79707e-09	0.0349123	0.951814	1.61223e-06	0.225621	19.2029	19.4616	6.58033	4.55702	6.20936	20.9774	20.9298	22.8048	21.3448	-0.111708	-0.119476	-1.67578	-2.18631	-1.73215	-0.0421943	1259.54	1252.78	425.311	298.254	408.975	1321.77	1310.89	1430.07	1342.12	1265	1246	445	303	435	1337	1276	1356	1273
Asphd1	NM_001039645	233879	chr7	aspartate beta-hydroxylase domain containing 1	10628	13.1066	0.0219356	0.0431657	0.705978	0.907922	0.819436	0.000120547	0.984257	0.956557	0.00347615	11.8912	10.474	11.6711	11.0225	15.5865	20.81	12.0701	11.3276	10.8459	0.122731	-0.0865634	0.0747277	0.0106119	0.517865	0.869953	262.861	227.23	254.226	243.132	345.995	441.906	254.781	239.404	229.843	264	226	266	247	368	447	248	227	218
Aspn	NM_025711	66695	chr13	asporin	11965	1.16468	-0.309186	-0.233497	-1.12866	0.379389	0.504904	0.00211989	0.850546	0.817237	0.0336253	0.813788	1.52148	1.05374	1.3962	0.429276	0.912917	1.24392	1.94608	1.2935	-0.805248	0.0624771	-0.457552	-0.0368305	-1.70711	-0.698567	81.6451	149.809	104.168	139.778	43.2314	87.9879	119.177	186.659	124.417	82	149	109	142	46	89	116	177	118
Asrgl1	NM_025610	66514	chr19	asparaginase like 1	5581	15.8224	-0.0978593	-0.508875	-0.285625	0.426506	4.69253e-05	0.0210972	0.868659	0.00253163	0.164505	16.5293	16.9969	13.7428	11.4563	12.6583	17.1268	19.3128	18.7557	17.6683	-0.104369	-0.0912139	-0.391757	-0.635967	-0.482975	-0.111086	1604.05	1618.75	1314.15	1109.36	1233.57	1596.6	1789.62	1740.13	1643.65	1611	1610	1375	1127	1312	1615	1742	1650	1559
Atad2b	NM_001099628	320817	chr12	ATPase family, AAA domain containing 2B	9087	1.5067	-0.514149	0.0308023	0.158142	0.00179771	0.847501	0.320935	0.0647913	0.961176	0.665521	1.19222	0.992627	1.71119	1.47791	1.61123	1.91089	1.42515	1.7324	1.6954	-0.375458	-0.666084	0.123633	-0.0693382	0.0641861	0.24596	412.214	336.822	583.006	509.889	559.43	634.684	470.526	572.661	561.942	414	335	610	518	595	642	458	543	533
Atat1	NA	NA	NA	NA	10119	5.77536	-0.0432247	-0.467521	-0.156572	0.798631	0.0069166	0.35735	0.970129	0.0938843	0.69737	5.79252	6.37628	4.75996	4.29617	5.09696	6.27133	6.92338	6.68628	5.86201	-0.099608	0.0115383	-0.403141	-0.532453	-0.277589	-0.0431303	356.456	385.083	288.634	263.803	314.969	370.726	406.827	393.377	345.818	358	383	302	268	335	375	396	373	328
Atf3	NM_007498	11910	chr1	activating transcription factor 3	2764	49.5309	0.77266	2.32534	5.00489	6.0036e-05	5.05101e-34	2.53712e-130	0.00577695	6.32134e-30	3.1752e-126	9.37527	7.44744	31.5846	17.8634	136.468	183.831	5.28204	4.39535	5.63423	0.939589	0.580912	2.66938	1.86568	4.80753	5.17329	790.576	616.334	2624.49	1503.09	11556.4	14891.4	425.32	354.363	455.456	794	613	2746	1527	12291	15063	414	336	432
Atf4	NM_009716	11911	chr15	activating transcription factor 4	1283	101.66	-0.135668	0.404263	0.500713	0.260952	0.000691612	2.56111e-05	0.771513	0.0186542	0.000996486	78.9155	78.4628	128.889	99.8973	137.615	108.428	93.48	87.593	87.5542	-0.118063	-0.153436	0.568357	0.218909	0.69017	0.282291	5822.78	5681.73	9371.12	7355.03	10196.8	7685.41	6586.27	6179.03	6192.94	5848	5651	9805	7472	10845	7774	6411	5859	5874
Atf5	NR_033136	107503	chr7	activating transcription factor 5	3891	34.7084	-0.0652868	0.0323229	0.482119	0.557687	0.770766	1.08564e-05	0.920409	0.940903	0.00047841	30.1594	29.7181	35.1001	28.9482	43.3234	44.9663	36.0591	29.3926	31.8876	-0.0412234	-0.0895497	0.156332	-0.103444	0.487196	0.476867	2234.32	2160.68	2562.36	2139.97	3223.11	3200.11	2550.88	2081.83	2264.63	2244	2149	2681	2174	3428	3237	2483	1974	2148
Atg4c	NM_175029	242557	chr4	autophagy-related 4C (yeast)	5638	11.0262	-0.0535564	-0.152307	-0.327457	0.64375	0.189762	0.00512007	0.941295	0.56815	0.0630686	10.8951	12.2224	11.3569	10.2051	8.66406	10.6539	11.3044	12.9081	13.0398	-0.124608	0.0140819	-0.0859761	-0.222044	-0.448851	-0.214792	1477.6	1626.8	1517.73	1381.04	1179.98	1388	1463.96	1673.69	1695.31	1484	1618	1588	1403	1255	1404	1425	1587	1608
Athl1	NM_145387	212974	chr7	ATH1, acid trehalase-like 1 (yeast)	11432	1.44299	-0.331488	-1.03508	-0.326519	0.152128	1.81456e-05	0.157515	0.666218	0.00117058	0.492575	1.49795	1.35568	0.786886	0.963489	1.2537	1.64552	2.04229	1.9984	1.54195	-0.247429	-0.417525	-1.19051	-0.882982	-0.496801	-0.170215	190.176	168.914	98.4348	122.059	159.829	200.687	247.589	242.564	187.676	191	168	103	124	170	203	241	230	178
Atp13a3	NM_001128096	224088	chr16	ATPase type 13A3	2709	12.5631	0.182549	0.434667	0.330816	0.0977361	7.25987e-05	0.0025857	0.561945	0.00348112	0.0388343	11.2653	12.5667	13.2966	15.0353	14.3213	12.2507	10.1582	11.6106	10.8389	0.115698	0.246298	0.33358	0.528951	0.467966	0.178707	3513.78	3846.8	4086.78	4679.58	4485.85	3670.69	3025.51	3462.32	3240.91	3529	3826	4276	4754	4771	3713	2945	3283	3074
Atp1a2	NM_178405	98660	chr1	ATPase, Na+/K+ transporting, alpha 2 polypeptide	800	38.7073	-0.0994063	-0.650889	-0.0781301	0.499058	1.35258e-05	0.594989	0.899939	0.000915002	0.847554	41.2533	40.2374	28.4292	27.1363	30.4556	53.4666	44.7658	43.9144	46.9654	-0.0682239	-0.131267	-0.626527	-0.675553	-0.499899	0.247932	10962.5	10493.7	7444.33	7195.57	8127.35	13648.7	11359.3	11156.8	11964.2	11010	10437	7789	7310	8644	13806	11057	10579	11348
Atp1b2	NM_013415	11932	chr11	ATPase, Na+/K+ transporting, beta 2 polypeptide	2241	36.2596	-0.153766	-0.466023	0.345194	0.236226	0.000378916	0.00708965	0.752343	0.0120973	0.0795044	31.6822	34.6431	27.8205	25.5377	37.4288	57.5053	39.3457	36.1132	39.123	-0.205516	-0.103723	-0.414212	-0.519583	0.0409829	0.596405	4000.67	4293.22	3461.72	3217.83	4746.28	6975.59	4744.25	4359.81	4735.9	4018	4270	3622	3269	5048	7056	4618	4134	4492
Atp2a2	NR_027838	11938	chr5	ATPase, Ca++ transporting, cardiac muscle, slow twitch 2	279	116.217	0.248983	0.103766	0.118052	0.00237829	0.206794	0.15079	0.0763187	0.588723	0.480876	130.475	121.102	109.953	117.358	119.207	112.406	106.978	112.255	109.775	0.314705	0.180084	0.0466046	0.158749	0.190487	0.0417185	24025.9	21885.4	19951.3	21564.1	22043.7	19883.8	18810.6	19762.6	19378	24130	21767	20875	21907	23445	20113	18310	18739	18380
Atp2b3	NM_177236	320707	chrX	ATPase, Ca++ transporting, plasma membrane 3	2125	16.9357	0.324708	0.148748	0.0537023	0.00232622	0.164677	0.616764	0.0754214	0.535827	0.855639	19.7152	18.5138	15.2946	18.5051	16.949	14.9631	15.4411	16.1038	15.8913	0.382311	0.264544	-0.00513121	0.287827	0.170322	-0.073445	5677.41	5232.3	4340.05	5317.44	4901.43	4139.29	4245.99	4433.63	4386.93	5702	5204	4541	5402	5213	4187	4133	4204	4161
Atp6v0a1	NM_016920	11975	chr11	ATPase, H+ transporting, lysosomal V0 subunit A1	379	100.614	0.339607	0.264769	0.33393	0.000610701	0.00762832	0.000752854	0.0320223	0.0994498	0.0150286	111.131	102.131	94.4569	107.836	115.552	98.3602	90.7983	84.6504	86.4906	0.412123	0.263217	0.156379	0.365592	0.47449	0.178078	18913.1	17058.2	15840.6	18312.8	19748.6	16080.6	14755.7	13773.4	14110.7	18995	16966	16574	18604	21004	16266	14363	13060	13384
Atp6v0a2	NM_011596	21871	chr5	ATPase, H+ transporting, lysosomal V0 subunit A2	3174	14.2967	-0.0567657	-0.262204	0.336965	0.630374	0.0271949	0.00388455	0.939966	0.216389	0.0520201	14.2174	12.4997	11.6128	11.5515	14.9125	20.6368	14.9379	14.0053	14.2574	0.0457134	-0.16706	-0.267356	-0.256874	0.120629	0.525201	3242.95	2798.13	2610.15	2629.19	3415.85	4521.88	3253.58	3054.19	3117.56	3257	2783	2731	2671	3633	4574	3167	2896	2957
Atp8a1	NM_009727	11980	chr5	ATPase, aminophospholipid transporter (APLT), class I, type 8A, member 1	488	41.3481	0.273162	0.0145421	-0.115795	0.0013828	0.86558	0.17919	0.0540805	0.966117	0.522912	47.4673	48.6926	38.3254	41.9476	35.2585	38.8675	37.9729	42.2527	43.3749	0.268275	0.277966	-0.0615633	0.0868303	-0.154577	-0.0780166	16470.7	16581.7	13104.3	14524	12286	12955.7	12581.8	14017	14428	16542	16492	13711	14755	13067	13105	12247	13291	13685
Atp8a2	NM_015803	50769	chr14	ATPase, aminophospholipid transporter-like, class I, type 8A, member 2	1680	37.9513	0.506382	0.0730201	0.139632	0.00324582	0.673782	0.420107	0.091498	0.899599	0.743785	51.1719	41.16	25.1951	43.0766	38.1222	34.0691	35.6373	35.1782	30.2823	0.666818	0.32568	-0.376433	0.415294	0.248238	0.0220825	8047.14	6352.35	3904.22	6759.51	6020.31	5146.67	5351.41	5288.93	4565.11	8082	6318	4085	6867	6403	5206	5209	5015	4330
Atxn1l	NM_001080930	52335	chr8	ataxin 1-like	4500	6.60819	0.0736094	0.399998	0.264096	0.553031	0.00113669	0.0322275	0.919242	0.0267401	0.2153	5.98333	6.19468	7.46528	7.7862	7.91184	6.05608	5.70142	5.7667	6.5062	0.0619961	0.0849857	0.359871	0.438682	0.470957	0.0215025	1921.68	1952.56	2362.61	2495.32	2551.79	1868.46	1748.53	1770.72	2003.16	1930	1942	2472	2535	2714	1890	1702	1679	1900
Atxn2	NM_009125	20239	chr5	ataxin 2	2863	19.1612	0.285346	0.113246	0.100349	0.00316933	0.243587	0.301599	0.0909874	0.629605	0.647977	21.0415	21.2636	18.4132	19.0944	19.9675	17.4987	18.2542	17.7566	17.9167	0.291235	0.279308	0.077562	0.148076	0.221753	-0.0326088	4015.61	3982.54	3462.68	3636.17	3826.75	3208.02	3326.52	3239.8	3277.81	4033	3961	3623	3694	4070	3245	3238	3072	3109
Atxn2l	NM_183020	233871	chr7	ataxin 2-like	3739	17.1724	0.231058	0.183858	0.391304	0.0505026	0.119983	0.000878274	0.423052	0.465885	0.0170942	17.9915	16.5878	16.1016	17.3401	21.6211	17.2595	16.2738	14.2036	15.3117	0.301314	0.157091	0.120032	0.245013	0.57243	0.183483	2854.63	2582.97	2517.44	2745.34	3445.01	2630.67	2465.61	2154.6	2328.94	2867	2569	2634	2789	3664	2661	2400	2043	2209
AW112010	NA	NA	NA	NA	12022	3.45716	-1.64091	-1.5247	-1.46187	0.000985987	0.00203884	0.00299538	0.0433963	0.0397134	0.043388	1.20423	2.54007	2.4341	1.61066	2.32137	1.92923	4.94458	10.6731	2.49401	-2.23281	-1.20148	-1.25636	-1.82531	-1.29699	-1.62326	39.8261	82.4448	79.3302	53.1511	77.0992	61.2915	156.161	337.448	79.0972	40	82	83	54	82	62	152	320	75
Axin2	NM_015732	12006	chr11	axin2	10648	1.48997	-0.72476	-0.752881	-0.623715	0.00145094	0.000942011	0.00580496	0.0555683	0.0233292	0.0684722	1.31509	1.17271	1.4145	1.02605	0.989298	1.72172	2.13742	2.14294	2.11231	-0.630037	-0.821566	-0.546469	-0.989525	-1.03282	-0.300524	238.965	209.132	253.275	186.038	180.509	300.537	370.871	372.286	367.954	240	208	265	189	192	304	361	353	349
Azin1	NM_018745	54375	chr15	antizyme inhibitor 1	516	65.1377	-0.0224502	0.224875	0.389554	0.817319	0.0199364	5.23371e-05	0.974973	0.181338	0.00176075	55.3506	58.9426	67.0088	68.4836	67.8396	85.8714	54.4581	63.1466	62.6807	-0.0546299	0.00899804	0.199872	0.249393	0.244955	0.520961	11876.6	12412.1	14168	14662.8	14617.8	17700	11157.9	12953.9	12893	11928	12345	14824	14896	15547	17904	10861	12283	12229
Azin2	NA	NA	NA	NA	2380	52.9716	0.0894293	0.0162946	0.297166	0.363042	0.868593	0.00236452	0.844486	0.966218	0.0364883	54.2422	48.8485	49.3855	48.5731	57.2902	62.959	55.206	47.2683	48.1418	0.175768	-0.00236844	0.0192464	0.0134348	0.260704	0.332784	4525.4	3999.63	4060.02	4043.69	4799.88	5045.84	4398.04	3770.28	3850.29	4545	3978	4248	4108	5105	5104	4281	3575	3652
B2m	NM_009735	12010	chr2	beta-2 microglobulin	693	316.74	-0.45869	-0.475317	-0.584405	0.00655198	0.00486247	0.000560991	0.145129	0.074212	0.0117997	221.816	340.879	293.928	260.903	251.796	267.602	425.176	471.816	302.318	-0.785254	-0.192497	-0.400427	-0.554243	-0.596306	-0.572503	8121.82	12249.2	10605	9532.41	9258.46	9412.5	14865.6	16516.4	10611.5	8157	12183	11096	9684	9847	9521	14470	15661	10065
B3galnt2	NM_178640	97884	chr13	UDP-GalNAc:betaGlcNAc beta 1,3-galactosaminyltransferase, polypeptide 2	9759	2.52065	-0.744518	-0.545128	-0.1845	5.25054e-06	0.000720414	0.243093	0.000938721	0.0192238	0.594039	1.84449	1.9435	2.24131	2.10373	2.52119	3.12497	3.21899	3.16703	3.47259	-0.767118	-0.718926	-0.508056	-0.58111	-0.311533	-0.0663597	289.745	299.621	346.934	329.754	397.709	471.564	482.852	475.64	522.933	291	298	363	335	423	477	470	451	496
B3galt2	NM_020025	26878	chr1	UDP-Gal:betaGlcNAc beta 1,3-galactosyltransferase, polypeptide 2	9733	2.10008	-0.092724	-0.336518	-0.79896	0.569914	0.0413476	2.39385e-06	0.923107	0.272207	0.000134346	2.07938	2.56953	2.04046	1.87836	1.34188	1.53289	2.6874	2.67071	2.3362	-0.23788	0.0397723	-0.286257	-0.38729	-0.861811	-0.73427	406.24	492.664	392.81	366.175	263.258	287.683	501.342	498.839	437.541	408	490	411	372	280	291	488	473	415
B3gnt5	NM_054052	108105	chr16	UDP-GlcNAc:betaGal beta-1,3-N-acetylglucosaminyltransferase 5	9797	2.01493	-0.318904	-0.794329	-0.248557	0.136165	0.000280978	0.243618	0.642711	0.00974633	0.594787	1.65704	2.34367	1.54918	1.32149	1.56781	2.68832	2.40024	2.5917	2.74827	-0.573349	-0.101513	-0.691296	-0.90176	-0.646955	0.0652073	321.606	446.414	296.281	255.928	305.56	501.224	444.841	480.912	511.335	323	444	310	260	325	507	433	456	485
B3gntl1	NM_178664	210004	chr11	UDP-GlcNAc:betaGal beta-1,3-N-acetylglucosaminyltransferase-like 1	11869	1.04712	0.0293594	-0.690526	-0.479134	0.901439	0.00530713	0.0495713	0.983562	0.078584	0.274476	1.22756	1.30517	0.789223	0.745938	0.769546	1.03194	1.22915	1.27839	1.34687	-0.0017409	0.0592313	-0.654766	-0.717329	-0.663901	-0.307831	149.353	155.843	94.6161	90.5582	94.0126	120.61	142.803	148.707	157.093	150	155	99	92	100	122	139	141	149
B4galt4	NM_019804	56375	chr16	UDP-Gal:betaGlcNAc beta 1,4-galactosyltransferase, polypeptide 4	8466	6.46831	-0.240441	-0.410615	-0.208804	0.0961643	0.00478343	0.147359	0.558268	0.0733627	0.475601	6.11025	6.44261	5.98157	5.16463	5.64138	7.33674	7.94241	7.12686	7.96307	-0.264905	-0.215649	-0.316756	-0.510147	-0.373845	-0.0592624	603.386	624.377	582.05	508.905	559.428	695.978	748.931	672.856	753.825	606	621	609	517	595	704	729	638	715
B4galt5	NM_019835	56336	chr2	UDP-Gal:betaGlcNAc beta 1,4-galactosyltransferase, polypeptide 5	1986	28.9066	0.00305293	0.220676	0.42248	0.975622	0.0262475	1.915e-05	0.997053	0.213036	0.000780658	26.2456	24.4807	28.1938	30.7425	36.3331	32.0028	25.7146	27.5397	25.4158	0.0653607	-0.0621191	0.147414	0.290361	0.540566	0.293488	4708.6	4310.31	4984.23	5503.48	6545.9	5515.42	4405.23	4723.65	4371.12	4729	4287	5215	5591	6962	5579	4288	4479	4146
B630005N14Rik	NM_175312	101148	chr6	RIKEN cDNA B630005N14 gene	7869	4.36224	-0.676813	0.127834	0.000103521	4.24728e-06	0.366916	0.99942	0.000793353	0.727227	0.999912	2.50166	3.36245	5.03847	5.1803	4.66769	4.77532	4.34082	5.03119	5.1717	-0.889008	-0.490242	0.0982453	0.15635	0.0153749	-0.0157229	442.084	583.153	877.373	913.472	828.34	810.655	732.497	850.028	876.122	444	580	918	928	881	820	713	806	831
Bach1	NM_007520	12013	chr16	BTB and CNC homology 1	5536	6.38058	-0.051922	0.789256	0.807158	0.728359	6.79604e-08	3.36874e-08	0.955007	1.25077e-05	2.99005e-06	4.33341	4.72513	8.33387	7.87631	9.71896	6.77602	4.30797	4.97296	5.30122	-0.10164	-0.00395339	0.819985	0.756669	1.069	0.484901	1083.31	1159.27	2052.95	1964.75	2439.91	1627.24	1028.37	1188.56	1270.43	1088	1153	2148	1996	2595	1646	1001	1127	1205
Bach2	NM_001109661	12014	chr4	BTB and CNC homology 2	7289	2.60526	0.414636	-0.163681	-0.267622	0.00045473	0.175974	0.0276713	0.025986	0.550715	0.195653	3.65926	3.10932	2.32017	2.2128	2.04337	2.2176	2.56472	2.71484	2.61568	0.53915	0.277335	-0.138753	-0.188932	-0.29453	-0.24057	1326.26	1105.98	828.631	800.272	743.718	772.099	887.623	940.726	908.808	1332	1100	867	813	791	781	864	892	862
Bai3	NM_175642	210933	chr1	brain-specific angiogenesis inhibitor 3	6293	5.20853	0.0338215	-0.234533	-0.526477	0.776614	0.0513662	1.58304e-05	0.965981	0.306264	0.00065602	6.18156	5.73432	4.75798	5.12804	3.70695	4.46322	5.43755	6.25858	6.39384	0.0997297	-0.0355987	-0.298811	-0.17274	-0.631286	-0.427667	1456.69	1326.17	1104.84	1205.82	877.228	1010.35	1223.56	1410.03	1444.39	1463	1319	1156	1225	933	1022	1191	1337	1370
Bambi	NM_026505	68010	chr18	BMP and activin membrane-bound inhibitor, homolog (Xenopus laevis)	9130	2.30939	-0.178328	-0.309765	-0.817682	0.243497	0.0438338	2.28261e-07	0.76035	0.281378	1.57828e-05	2.34245	2.70552	2.35848	2.2428	1.61066	1.65554	2.63114	2.92851	3.30835	-0.27124	-0.0907624	-0.282611	-0.336939	-0.804265	-0.828556	503.817	571.088	499.854	481.344	347.881	342.056	540.385	602.194	682.129	506	568	523	489	370	346	526	571	647
BC002163	NR_002445	170658	chr4	NADH dehydrogenase Fe-S protein 5 pseudogene	10673	6.58007	-1.43405	-0.307396	-1.42636	0.00368813	0.514224	0.00384196	0.0993923	0.821772	0.0516457	5.52473	1.56142	8.15345	7.39993	5.37345	1.76454	15.2188	7.64432	7.07142	-0.785466	-2.61951	-0.247144	-0.36855	-0.819169	-2.47621	231.997	64.3504	337.377	310.067	226.617	71.1746	610.229	306.909	284.676	233	64	353	315	241	72	594	291	270
BC026585	NM_001033284	226527	chr1	cDNA sequence BC026585	11999	1.98762	0.0021078	-0.571805	-0.927817	0.99309	0.0232901	0.00033674	0.998957	0.198959	0.0080444	2.3893	2.57016	1.62217	1.70366	1.27656	1.34702	2.42525	2.56683	2.6991	-0.0373907	0.040232	-0.611977	-0.524055	-0.926365	-0.912981	131.43	138.751	87.9241	93.5119	70.512	71.1786	127.393	134.996	142.332	132	138	92	95	75	72	124	128	135
BC028528	NM_153513	229600	chr3	cDNA sequence BC028528	12344	3.0816	-0.550964	-1.03562	-0.324551	0.115863	0.00423929	0.34623	0.600178	0.0674139	0.687725	2.66203	2.95385	1.7796	2.22368	2.2087	4.4778	3.77881	4.56836	4.43937	-0.605428	-0.484692	-1.19357	-0.862546	-0.863711	0.0762761	50.7795	55.2993	33.4436	42.3269	42.292	82.0561	68.8364	83.3168	81.1837	51	55	35	43	45	83	67	79	77
Bcam	NM_020486	57278	chr7	basal cell adhesion molecule	164	291.455	0.00214128	0.110164	0.323641	0.981031	0.220045	0.000296302	0.998315	0.603985	0.00723592	278.316	254.2	269.573	303.85	341.885	329.169	295.115	259.53	271.826	0.0789019	-0.078926	0.0116301	0.202421	0.381762	0.263056	28588.2	25625.6	27285.7	31143.7	35266.2	32480.6	28946.3	25487	26766.5	28712	25487	28549	31639	37508	32855	28176	24167	25388
Bcan	NM_007529	12032	chr3	brevican	3101	23.665	0.124401	-0.313228	-0.276168	0.228901	0.00280633	0.00832879	0.744667	0.0503169	0.0903248	28.531	26.4464	18.8531	21.7008	19.8646	22.2036	27.5491	24.1715	26.6628	0.191026	0.0545215	-0.427746	-0.206753	-0.32507	-0.228542	3977.77	3618.57	2590.07	3018.99	2781.2	2973.72	3667.6	3221.88	3563.52	3995	3599	2710	3067	2958	3008	3570	3055	3380
Bcar1	NM_009954	12927	chr8	breast cancer anti-estrogen resistance 1	5090	13.4587	0.38447	0.3429	0.606689	0.0045149	0.0113658	6.60355e-06	0.114381	0.12861	0.000317859	15.095	12.0449	13.3896	12.9859	17.4773	14.4116	12.1894	10.0762	10.0704	0.549845	0.197316	0.355761	0.32973	0.767245	0.425123	2049.12	1604.68	1791.07	1759.03	2382.55	1879.34	1580.05	1307.74	1310.5	2058	1596	1874	1787	2534	1901	1538	1240	1243
Bcas1	NM_029815	76960	chr2	breast carcinoma amplified sequence 1	8082	5.71272	-0.192329	-0.513874	-0.698353	0.310267	0.0073869	0.000304993	0.811225	0.0973127	0.00738296	6.18074	6.11554	6.02077	3.82134	3.41136	5.36714	7.1055	7.67934	7.04523	-0.17115	-0.213471	-0.230125	-0.866826	-1.02106	-0.432354	778.627	756.089	747.4	480.357	431.553	649.514	854.748	924.905	850.823	782	752	782	488	459	657	832	877	807
Bckdhb	NM_199195	12040	chr9	branched chain ketoacid dehydrogenase E1, beta polypeptide	7530	14.5257	-0.0463544	-0.200434	-0.421527	0.703863	0.102255	0.000674805	0.951814	0.436642	0.0137768	14.9371	15.9358	13.7214	13.9886	11.2837	12.7477	15.5449	18.0461	15.9274	-0.0798853	-0.0136611	-0.223428	-0.17753	-0.477956	-0.366143	891.14	933.046	806.648	832.756	676.02	730.578	885.569	1029.31	910.918	895	928	844	846	719	739	862	976	864
Bcl11b	NM_021399	58208	chr12	B-cell leukemia/lymphoma 11B	8756	1.8152	0.319823	-0.248559	-0.519614	0.0498752	0.135629	0.00207366	0.420896	0.494003	0.0330529	2.4673	2.17422	1.7812	1.34971	1.18709	1.43622	2.10009	2.02578	1.65523	0.420302	0.211067	-0.0702872	-0.451632	-0.627258	-0.416904	811.485	701.796	577.273	442.953	392.068	453.769	659.552	636.994	521.887	815	698	604	450	417	459	642	604	495
Bcl2	NM_177410	12043	chr1	B-cell leukemia/lymphoma 2	3307	9.90405	-0.0521078	-0.0443352	-0.284233	0.580953	0.638318	0.00280928	0.926875	0.88396	0.0413448	9.83196	10.4728	10.5173	9.87568	8.49644	8.94079	10.3089	10.7886	11.5966	-0.0844799	-0.0204875	-0.00852594	-0.0811932	-0.28895	-0.279437	3023.9	3161.09	3187.42	3030.8	2624.18	2641.55	3027.57	3172.31	3419.08	3037	3144	3335	3079	2791	2672	2947	3008	3243
Bcl2l1	NM_009743	12048	chr2	BCL2-like 1	3145	53.6248	0.0530722	0.388212	0.298645	0.64556	0.000687284	0.00915158	0.942069	0.0185775	0.096416	49.9303	46.5731	59.6728	61.9826	64.5936	50.4926	48.3875	47.3657	48.8057	0.115361	-0.0120908	0.35122	0.424109	0.492814	0.0735833	3089.62	2828.3	3638.53	3827.14	4013.85	3001.4	2859.08	2802.13	2895.1	3103	2813	3807	3888	4269	3036	2783	2657	2746
Bcl3	NM_033601	12051	chr7	B-cell leukemia/lymphoma 3	9977	5.10418	-0.0753066	0.537015	1.4558	0.723621	0.00960174	7.82556e-13	0.954819	0.116636	1.65995e-10	3.53475	2.60346	5.23921	4.15709	9.63675	8.25311	3.91559	3.49346	2.65438	0.139458	-0.326803	0.684331	0.369532	1.58918	1.30195	276.801	200.083	404.282	324.832	757.827	620.842	292.79	261.549	199.275	278	199	423	330	806	628	285	248	189
Bcorl1	NM_178782	320376	chrX	BCL6 co-repressor-like 1	9028	2.00999	-0.273765	-0.566229	0.0214447	0.0880101	0.000500563	0.892152	0.540672	0.0149512	0.963086	1.93512	1.82647	1.50283	1.56622	2.1492	2.51587	2.62605	1.95818	2.48247	-0.219138	-0.329349	-0.604249	-0.526707	-0.0619928	0.100982	505.809	468.534	387.074	408.503	564.132	631.718	655.442	489.356	622.037	508	466	405	415	600	639	638	464	590
Bdkrb2	NM_009747	12062	chr12	bradykinin receptor, beta 2	12057	1.51092	-0.706497	-0.358372	1.66988	0.0189958	0.219524	2.77847e-10	0.258125	0.603679	3.86362e-08	0.722178	0.585879	0.730543	0.935646	3.00366	3.89004	1.06546	1.15397	1.10449	-0.54472	-0.866537	-0.549465	-0.180424	1.49665	1.80447	51.7757	41.2238	51.6024	66.9358	216.243	267.912	72.9442	79.0996	75.914	52	41	54	68	230	271	71	75	72
Bdnf	NM_007540	12064	chr2	brain derived neurotrophic factor	3887	14.3814	0.156253	0.602868	1.37988	0.22609	2.31228e-06	1.10062e-27	0.742655	0.000243178	6.88711e-25	11.1561	9.23552	15.0041	12.7992	26.2747	21.6881	8.68492	10.2085	9.56094	0.29805	-0.00143904	0.704165	0.493064	1.53956	1.19884	2048.13	1664	2714.33	2344.71	4844.08	3824.91	1522.52	1791.8	1682.66	2057	1655	2840	2382	5152	3869	1482	1699	1596
Bend3	NM_199028	331623	chr10	BEN domain containing 3	9906	1.53775	0.40311	0.743209	0.225214	0.0185901	1.07779e-05	0.191211	0.254825	0.000794527	0.537632	1.56986	1.55971	1.88242	2.07505	1.53422	1.24783	1.1253	1.30761	1.24405	0.419923	0.383576	0.660083	0.81846	0.392948	0.0318486	405.244	395.137	478.825	534.499	397.719	309.431	277.385	322.716	307.858	407	393	501	543	423	313	270	306	292
Bhlhe40	NM_011498	20893	chr6	basic helix-loop-helix family, member e40	5028	14.0154	0.494339	0.512559	0.760676	0.0431049	0.0358891	0.00178173	0.389219	0.251437	0.0295342	13.0113	15.3233	15.9381	12.7275	24.0682	9.95446	10.1232	10.9772	10.1248	0.385899	0.594671	0.657241	0.350991	1.27897	-0.058102	1728.51	1997.8	2086.4	1687.17	3210.91	1270.35	1284.18	1394.21	1289.41	1736	1987	2183	1714	3415	1285	1250	1322	1223
Bhlhe41	NM_024469	79362	chr6	basic helix-loop-helix family, member e41	3514	11.6275	0.231373	0.360773	1.017	0.035079	0.000968923	4.85318e-21	0.352748	0.0237301	2.0944e-18	9.62465	10.1233	12.2455	9.34664	17.2297	17.0879	8.55782	8.80455	8.76528	0.208204	0.253979	0.534298	0.162822	1.05412	0.978184	2462.33	2541.75	3087.07	2386.05	4426.61	4199.59	2090.64	2153.54	2149.71	2473	2528	3230	2424	4708	4248	2035	2042	2039
Bicd2	NM_029791	76895	chr13	bicaudal D homolog 2 (Drosophila)	2993	12.841	0.296827	-0.0203992	0.142217	0.00160908	0.829884	0.132166	0.0602924	0.958751	0.449349	15.1885	13.7192	12.0975	11.0994	12.3204	13.918	12.1689	12.2163	12.1919	0.381018	0.207204	0.0316156	-0.0744571	0.0852439	0.197086	4117.17	3649.74	3231.39	3002.25	3353.8	3624.22	3149.82	3165.98	3168.16	4135	3630	3381	3050	3567	3666	3066	3002	3005
Birc6	NM_007566	12211	chr17	baculoviral IAP repeat-containing 6	2861	5.39529	0.309853	0.117899	0.0120551	0.000949455	0.210751	0.898495	0.0419874	0.593181	0.964491	6.31388	5.99408	5.41535	5.35238	5.08978	5.00721	4.80938	5.18026	5.43932	0.359835	0.257793	0.117194	0.118439	0.0550711	-0.0325262	4248.6	3958.41	3590.75	3593.85	3439.37	3236.69	3090.24	3332.61	3508.7	4267	3937	3757	3651	3658	3274	3008	3160	3328
Blcap	NM_016916	53619	chr2	bladder cancer associated protein homolog (human)	3473	33.1525	-0.0642838	0.082367	0.28147	0.521817	0.409257	0.00456219	0.907682	0.760143	0.0579065	29.7818	29.4891	35.5125	30.073	35.1458	40.9498	32.6529	31.6151	32.016	-0.0437494	-0.0850632	0.188837	-0.0328311	0.201164	0.357593	2643.55	2568.89	3106.18	2663.64	3132.85	3491.75	2767.65	2682.96	2724.31	2655	2555	3250	2706	3332	3532	2694	2544	2584
Bmp1	NR_033241	12153	chr14	bone morphogenetic protein 1	9722	2.21817	-0.154682	-0.0976479	0.624664	0.331778	0.538084	4.70063e-05	0.82928	0.835811	0.00162262	1.89107	1.69783	1.8013	1.93065	2.99984	3.22152	2.0094	2.19373	2.00778	-0.0663283	-0.248373	-0.157479	-0.0396274	0.603935	0.642705	359.443	316.713	337.374	366.176	572.596	588.219	364.708	398.649	365.847	361	315	353	372	609	595	355	378	347
Bmp5	NM_007555	12160	chr9	bone morphogenetic protein 5	11267	1.84124	-0.187457	-0.499039	-0.872344	0.408849	0.0303197	0.000213118	0.859448	0.230249	0.00547675	1.75358	2.3456	1.50142	1.79222	1.19766	1.37366	1.98456	2.7812	2.47723	-0.395524	-0.0047565	-0.639387	-0.367339	-0.936134	-0.80326	189.18	248.343	159.603	192.932	129.745	142.358	204.446	286.855	256.197	190	247	167	196	138	144	199	272	243
Bmp7	NM_007557	12162	chr2	bone morphogenetic protein 7	10728	1.75609	-0.228727	-1.16627	-0.13488	0.423754	9.47302e-05	0.635736	0.867592	0.00431951	0.863963	1.60844	1.94932	0.984674	0.86921	1.12389	2.74008	2.315	2.4581	1.69937	-0.358015	-0.108686	-1.08345	-1.24416	-0.866845	0.350389	251.908	299.62	151.962	135.838	176.742	412.251	346.214	368.062	255.153	253	298	159	138	188	417	337	349	242
Bmpr1a	NM_009758	12166	chr14	bone morphogenetic protein receptor, type 1A	1908	22.7917	0.0087484	0.244937	0.19899	0.923341	0.0066765	0.0277109	0.987281	0.0913269	0.195823	20.1478	21.681	24.1711	25.0307	24.8618	23.209	20.6756	22.557	21.3375	-0.0311642	0.0475518	0.210221	0.278743	0.278172	0.114923	4712.59	4976.91	5571.06	5842.09	5839.78	5214.89	4617.89	5044.26	4784.4	4733	4950	5829	5935	6211	5275	4495	4783	4538
Bmpr1b	NM_007560	12167	chr3	bone morphogenetic protein receptor, type 1B	10281	1.4522	-0.0677631	0.0787086	-0.688243	0.694374	0.645228	0.000115101	0.951489	0.887425	0.00334996	1.4453	1.62145	1.63596	1.7531	0.973783	1.03777	1.66872	1.48149	1.8401	-0.138418	1.24638e-05	0.0186397	0.136228	-0.699918	-0.672228	319.615	351.903	356.489	386.847	216.248	220.458	352.379	313.232	390.09	321	350	373	393	230	223	343	297	370
Bnip3	NM_009760	12176	chr7	BCL2/adenovirus E1B interacting protein 3	890	129.588	-0.00109722	0.239279	0.00709066	0.989737	0.00476532	0.933719	0.998957	0.0732957	0.977592	114.866	130.752	142.982	146.699	126.628	122.211	121.345	131.217	129.077	-0.0832095	0.0765796	0.211415	0.266557	0.0635071	-0.0517349	8607.71	9616	10558.2	10969.6	9529.25	8797.59	8683.07	9400.9	9272.54	8645	9564	11047	11144	10135	8899	8452	8914	8795
Bok	NM_016778	51800	chr1	BCL2-related ovarian killer protein	9888	6.62894	-0.144931	0.719678	0.625124	0.536949	0.00159895	0.00621847	0.915786	0.0339166	0.0719262	4.96943	4.25818	9.68163	7.13495	9.97401	5.80992	5.95061	5.2528	4.66117	-0.0252808	-0.274303	0.913392	0.491989	0.983525	0.141675	303.685	255.382	583.008	435.078	612.1	341.065	347.24	306.9	273.072	305	254	610	442	651	345	338	291	259
Brap	NM_028227	72399	chr5	BRCA1 associated protein	783	67.1169	0.0408839	0.219652	0.28203	0.682711	0.0274068	0.0045701	0.95125	0.217133	0.0579482	64.1643	59.3135	68.6889	70.9871	80.5788	66.3253	62.3627	64.5148	59.6735	0.109402	-0.0310728	0.186471	0.252063	0.444085	0.0992443	10232.7	9283.2	10794.2	11296.4	12904.7	10160.9	9496.72	9836.46	9122.83	10277	9233	11294	11476	13725	10278	9244	9327	8653
Brd2	NR_037970	14312	chr17	bromodomain containing 2	1253	38.035	-0.127745	0.0594719	0.25974	0.151151	0.501528	0.00317794	0.66521	0.815251	0.04561	33.2035	32.9039	39.7205	35.5059	45.5104	41.6078	38.594	37.2338	36.3935	-0.107785	-0.147935	0.129502	-0.0141878	0.353099	0.159749	6614.35	6432.79	7797	7057.76	9104.27	7962.22	7341.36	7091.28	6949.92	6643	6398	8158	7170	9683	8054	7146	6724	6592
Brd4	NM_198094	57261	chr17	bromodomain containing 4	2536	16.3047	0.217605	0.174905	0.353203	0.0346579	0.0897821	0.00057875	0.350358	0.40837	0.0120517	17.189	15.4462	14.9138	16.7462	18.6385	17.5068	15.5385	14.4585	13.6309	0.305366	0.124093	0.0793535	0.264612	0.428214	0.273848	4363.1	3847.81	3730.28	4241.55	4750.99	4268.79	3766.22	3508.73	3316.82	4382	3827	3903	4309	5053	4318	3666	3327	3146
Brinp3	NA	NA	NA	NA	11529	1.30101	0.352822	-0.231465	-0.614393	0.0943642	0.286989	0.00585105	0.554737	0.66623	0.0687567	1.73605	1.69387	1.18087	1.10464	0.893633	0.873969	1.36647	1.55856	1.24807	0.381975	0.319693	-0.192185	-0.269807	-0.564238	-0.659515	230.999	221.197	154.828	146.666	119.406	111.711	173.623	198.268	159.207	232	220	162	149	127	113	169	188	151
Bsn	NM_007567	12217	chr9	bassoon	1519	9.58018	0.359294	0.136158	0.218341	0.00194513	0.24251	0.0604051	0.067244	0.628625	0.303789	11.6857	9.67381	9.04586	9.25102	10.7586	8.74763	9.32535	8.15348	8.41366	0.501303	0.201676	0.110713	0.161178	0.388138	0.025643	7947.57	6456.92	6062.31	6278.16	7347.92	5715.12	6056.16	5301.59	5485.51	7982	6422	6343	6378	7815	5781	5895	5027	5203
Bst2	NM_198095	69550	chr8	bone marrow stromal cell antigen 2	9451	14.3686	-0.504481	-0.814322	-0.291359	0.0558704	0.0023091	0.265283	0.444486	0.0434103	0.613796	8.80277	15.7956	11.3047	8.47987	11.8578	16.9374	21.5576	20.2134	12.3137	-0.967151	-0.152895	-0.628528	-1.02398	-0.532606	-0.0832006	287.752	506.74	364.141	276.598	389.244	531.87	672.905	631.718	385.889	289	504	381	281	414	538	655	599	366
Btbd3	NM_145534	228662	chr2	BTB (POZ) domain containing 3	979	46.2233	0.0663485	0.296545	0.104434	0.513743	0.00334155	0.30345	0.903273	0.0568973	0.650398	44.883	43.1583	49.0186	54.1466	49.7689	41.2114	41.8985	45.7008	43.0579	0.10752	0.0239222	0.213441	0.375082	0.262661	-0.0735319	8883.52	8383.34	9560.35	10693.9	9892.19	7835.68	7918.73	8647.9	8169.74	8922	8338	10003	10864	10521	7926	7708	8200	7749
Btg1	NM_007569	12226	chr10	B-cell translocation gene 1, anti-proliferative	4368	10.4231	-0.195807	0.388475	0.532329	0.193169	0.0086775	0.000309858	0.716299	0.108817	0.00747182	7.06759	8.52796	11.8678	11.4749	15.1931	10.7335	8.12507	10.3953	9.20627	-0.322771	-0.0790149	0.40338	0.372942	0.786927	0.221804	1510.46	1788.67	2499.28	2447.08	3260.73	2203.6	1658.13	2124.01	1886.14	1517	1779	2615	2486	3468	2229	1614	2014	1789
Btg2	NM_007570	12227	chr1	B-cell translocation gene 2, anti-proliferative	8714	4.62306	0.765137	0.231334	0.584927	7.47301e-05	0.237548	0.00254502	0.00668033	0.62406	0.038421	5.59269	6.08151	3.98828	4.06385	6.19835	4.13786	2.78849	4.13346	3.74492	0.716101	0.809786	0.207912	0.253033	0.870336	0.224286	735.812	785.247	517.056	533.515	818.948	522.969	350.329	519.926	472.327	739	781	541	542	871	529	341	493	448
Bves	NM_024285	23828	chr10	blood vessel epicardial substance	7394	13.1992	0.148179	-0.0984398	-0.33489	0.207093	0.406461	0.00523292	0.729102	0.758215	0.063942	14.2866	16.0593	12.4318	13.1043	10.8675	11.0147	13.2722	14.5571	14.6899	0.0754712	0.217	-0.146147	-0.0521272	-0.312647	-0.357192	979.756	1080.85	840.099	896.739	748.421	725.635	869.132	954.436	965.738	984	1075	879	911	796	734	846	905	916
C130074G19Rik	NM_178692	226777	chr1	RIKEN cDNA C130074G19 gene	6876	8.60576	0.136154	-0.250811	-0.425609	0.27991	0.0497639	0.000955045	0.789007	0.300432	0.0183883	9.33112	11.0652	8.68333	6.89509	7.02872	6.8889	9.6761	9.27767	9.8551	0.0226421	0.241287	-0.102273	-0.416504	-0.379663	-0.472565	1136.08	1322.15	1041.77	837.676	859.369	805.711	1124.94	1079.94	1150.24	1141	1315	1090	851	914	815	1095	1024	1091
C1qc	NM_007574	12262	chr4	complement component 1, q subcomponent, C chain	9921	8.87234	-0.475821	-0.761859	-0.164496	0.0711857	0.00431079	0.527593	0.496594	0.0682042	0.812856	6.57455	8.31354	5.84373	6.33825	6.74429	11.989	12.0792	13.0961	6.96855	-0.638237	-0.327686	-0.828805	-0.693965	-0.595598	0.168487	295.718	366.985	259.003	284.475	304.619	518.03	518.805	563.163	300.492	297	365	271	289	324	524	505	534	285
C1s1	NA	NA	NA	NA	9689	3.40533	-0.548862	-0.295323	-0.616908	0.00958205	0.158208	0.00366556	0.184203	0.528273	0.0500813	2.30914	3.3494	3.31938	3.40782	2.52571	2.91705	3.92458	5.48954	3.42733	-0.823912	-0.315931	-0.323064	-0.267139	-0.688973	-0.545584	286.757	408.207	406.189	422.283	314.97	347.988	465.388	651.748	408.025	288	406	425	429	335	352	453	618	387
C2cd2l	NM_027909	71764	chr9	C2 calcium-dependent domain containing 2-like	2790	20.4176	0.0584032	0.122652	0.305342	0.519953	0.175532	0.000698804	0.906772	0.549883	0.0141743	20.0157	18.4898	19.6392	20.5931	22.937	23.1639	19.6673	18.8349	18.9688	0.127376	-0.0140683	0.0787657	0.165286	0.329951	0.280134	3701.96	3356.15	3579.28	3800.56	4260.19	4115.56	3473.43	3330.5	3363.21	3718	3338	3745	3861	4531	4163	3381	3158	3190
C2cd3	NM_001017985	277939	chr7	C2 calcium-dependent domain containing 3	8917	1.6541	-0.115327	-0.474989	-0.154673	0.47356	0.00366919	0.336716	0.887135	0.0604209	0.680555	1.67254	1.73935	1.30049	1.35524	1.34526	2.01887	1.86209	1.93899	1.93978	-0.129963	-0.10058	-0.513402	-0.43596	-0.437466	0.0832488	557.584	569.078	427.215	450.83	450.358	646.548	592.777	618.012	619.93	560	566	447	458	479	654	577	586	588
C430002N11Rik	NA	NA	NA	NA	11953	1.97783	0.265133	0.298336	0.973479	0.318705	0.259947	0.000148276	0.819686	0.644845	0.00408483	1.89781	1.57529	1.86423	1.69064	2.54939	3.1978	1.7577	1.28979	1.44447	0.402226	0.109188	0.355609	0.233832	0.830915	1.0924	118.487	96.5228	114.688	105.323	159.83	191.789	104.787	76.9977	86.4583	119	96	120	107	170	194	102	73	82
C530044C16Rik	NA	NA	NA	NA	12363	0.999693	-0.442032	-0.129524	-0.995339	0.210442	0.707501	0.00662929	0.730548	0.914588	0.0754232	0.885068	1.06568	1.39413	1.02613	0.602059	0.739616	1.22087	1.064	1.83041	-0.558749	-0.322546	0.0647938	-0.352664	-1.09498	-0.868304	46.7967	55.2992	72.6381	54.136	31.9592	37.5667	61.6449	53.7992	92.7681	47	55	76	55	34	38	60	51	88
Cacna1a	NM_007578	12286	chr8	calcium channel, voltage-dependent, P/Q type, alpha 1A subunit	2611	12.17	0.369775	0.134257	0.0967682	0.00235413	0.27195	0.428869	0.0759121	0.6575	0.747273	15.1142	12.6507	11.0167	12.5553	12.739	10.398	11.8836	11.0027	10.5263	0.504592	0.22089	0.0272642	0.233928	0.264076	-0.0928125	5023.24	4126.31	3607.95	4163.78	4251.73	3319.73	3771.36	3496.07	3353.72	5045	4104	3775	4230	4522	3358	3671	3315	3181
Cacna1b	NM_007579	12287	chr2	calcium channel, voltage-dependent, N type, alpha 1B subunit	1496	16.0086	0.458826	0.225163	0.325222	4.55801e-06	0.0251486	0.00118882	0.000826718	0.208296	0.0218796	19.1431	17.3019	13.9033	17.0598	16.4963	17.0329	13.9596	13.1721	14.0831	0.542644	0.369691	0.060091	0.373327	0.334068	0.316224	7885.84	6994.83	5643.69	7012.48	6824.2	6740.3	5491.12	5187.69	5561.41	7920	6957	5905	7124	7258	6818	5345	4919	5275
Cacnb4	NM_146123	12298	chr2	calcium channel, voltage-dependent, beta 4 subunit	785	31.5037	0.232376	0.35196	0.0792303	0.0155272	0.000238195	0.4109	0.231612	0.00881954	0.737801	31.531	33.6301	33.6878	36.9978	30.3719	28.6629	25.796	31.3525	28.9961	0.199008	0.264903	0.273227	0.426543	0.151061	0.00348967	10667.8	11166.4	11231	12490.4	10319	9315.62	8333.77	10141.2	9404.32	10714	11106	11751	12689	10975	9423	8112	9616	8920
Cacng4	NM_019431	54377	chr11	calcium channel, voltage-dependent, gamma subunit 4	12140	2.10518	-0.0835903	-1.64286	-0.625897	0.784038	1.18787e-06	0.0461847	0.966838	0.000138104	0.262609	2.84535	2.58609	1.01629	0.822214	1.2709	2.52427	3.22822	2.54811	3.16904	-0.00350453	-0.166955	-1.48816	-1.76848	-1.14601	-0.232091	119.482	106.577	42.0525	34.4496	53.575	101.828	129.445	102.309	127.572	120	106	44	35	57	103	126	97	121
Cadm2	NM_178721	239857	chr16	cell adhesion molecule 2	4038	5.94022	0.0964995	0.0807862	-0.346695	0.359413	0.442906	0.00118194	0.843424	0.783886	0.0217849	5.90372	6.96056	6.03371	6.66602	4.70039	4.83619	5.7887	6.63248	6.25692	-0.0126075	0.197811	-0.00242166	0.159414	-0.335223	-0.358149	2409.56	2788.08	2426.64	2714.83	1926.53	1896.14	2256.04	2588.04	2448.08	2420	2773	2539	2758	2049	1918	2196	2454	2322
Calhm2	NM_133746	72691	chr19	calcium homeostasis modulator 2	12138	1.05139	-0.928712	-0.880737	-0.421104	0.00191782	0.00307259	0.14445	0.0666708	0.0531125	0.472511	0.694605	0.808427	0.942841	0.609205	1.04934	1.10632	1.64873	1.55169	1.24518	-1.01685	-0.827904	-0.603097	-1.20599	-0.423613	-0.411421	60.7363	69.3754	81.2421	53.151	92.1374	92.9279	137.663	129.721	104.386	61	69	85	54	98	94	134	123	99
Caln1	NM_181045	140904	chr5	calneuron 1	9623	4.56153	0.514348	0.066172	0.0956203	0.00292253	0.706479	0.585686	0.0860085	0.913954	0.843149	5.87154	5.38539	3.586	4.65579	4.50592	3.97494	3.94441	4.56826	3.7368	0.58698	0.435497	-0.143971	0.249827	0.211895	-0.032416	568.537	511.768	342.15	449.847	438.147	369.736	364.708	422.903	346.871	571	509	358	457	466	374	355	401	329
Calu	NM_184053	12321	chr6	calumenin	1243	55.2969	0.0575024	0.290551	0.278041	0.59024	0.00621678	0.00885111	0.931005	0.0871487	0.0939539	48.3113	54.2141	53.987	66.2624	61.1174	59.2391	46.0651	53.1786	53.7217	-0.0138105	0.125399	0.125191	0.43885	0.331448	0.222399	6657.16	7331.65	7330.59	9111.11	8457.39	7841.61	6061.3	7005.85	7096.47	6686	7292	7670	9256	8995	7932	5900	6643	6731
Camk1	NM_133926	52163	chr6	calcium/calmodulin-dependent protein kinase I	5060	29.738	-0.0223776	-0.119086	0.682559	0.866961	0.373976	1.93751e-07	0.982172	0.734188	1.36907e-05	25.4959	25.7144	24.313	23.5351	33.4145	51.1737	27.0569	27.2007	26.5442	-0.0150085	-0.0297667	-0.104719	-0.133494	0.381053	0.931738	1560.24	1544.35	1466.12	1437.14	2053.45	3008.32	1581.08	1591.43	1557.2	1567	1536	1534	1460	2184	3043	1539	1509	1477
Camk1g	NM_144817	215303	chr1	calcium/calmodulin-dependent protein kinase I gamma	6736	10.321	-0.0472293	-0.334903	-0.776788	0.70018	0.00692895	8.82606e-10	0.951497	0.0939221	1.05198e-07	11.6327	11.8713	8.69094	10.5355	7.41462	6.86202	13.4431	12.1183	12.166	-0.0482268	-0.0460141	-0.489639	-0.194131	-0.691221	-0.866749	1217.73	1219.6	896.486	1100.5	779.45	690.044	1343.76	1212.82	1220.88	1223	1213	938	1118	829	698	1308	1150	1158
Camk2a	NM_177407	12322	chr18	calcium/calmodulin-dependent protein kinase II alpha	964	43.323	0.102868	0.242859	0.101071	0.25053	0.00648133	0.258791	0.762977	0.0897277	0.608408	42.874	42.5398	43.3465	50.6443	43.8042	42.1873	41.2042	39.9833	42.3803	0.121908	0.0835447	0.116491	0.359068	0.158953	0.0406744	9067.72	8829.75	9033.74	10688	9303.6	8571.2	8321.44	8084.73	8592.51	9107	8782	9452	10858	9895	8670	8100	7666	8150
Camk2d	NM_023813	108058	chr3	calcium/calmodulin-dependent protein kinase II, delta	489	79.3038	0.117898	0.243439	0.0672879	0.169596	0.00444911	0.433572	0.686601	0.0698627	0.749675	74.6884	84.3283	85.3689	87.8309	79.511	75.1282	71.96	75.6151	79.9422	0.041964	0.190007	0.21355	0.27268	0.138308	-0.00750973	13565.2	15031.3	15278.6	15917.9	14502.1	13107.9	12480.1	13130	13918.8	13624	14950	15986	16171	15424	13259	12148	12450	13202
Camk4	NM_009793	12326	chr18	calcium/calmodulin-dependent protein kinase IV	5197	3.26738	0.167868	0.417315	-0.00170774	0.168617	0.000563389	0.98888	0.684913	0.0161018	0.99657	3.01984	3.5978	3.60154	4.24789	2.98378	2.94328	2.93592	2.80897	3.39829	0.0506597	0.276092	0.283429	0.53956	0.0394109	-0.0442752	1589.12	1858.05	1867.53	2230.53	1576.77	1487.85	1475.26	1413.2	1714.28	1596	1848	1954	2266	1677	1505	1436	1340	1626
Camkk2	NM_145358	207565	chr5	calcium/calmodulin-dependent protein kinase kinase 2, beta	6173	6.28337	0.119354	0.130804	0.467491	0.336593	0.291692	0.000139568	0.832651	0.670049	0.00389887	6.48559	5.39158	6.05275	5.91965	6.83906	8.45937	5.84764	5.27128	5.88277	0.258474	-0.0348935	0.137686	0.123739	0.341048	0.583623	1353.14	1103.97	1244.38	1232.4	1432.91	1695.46	1165	1051.47	1176.6	1359	1098	1302	1252	1524	1715	1134	997	1116
Camsap1	NM_001115076	227634	chr2	calmodulin regulated spectrin-associated protein 1	2562	11.8698	0.250288	0.119238	0.310312	0.0103107	0.223137	0.00143912	0.191479	0.608093	0.0252249	13.2778	11.5033	10.6984	11.9188	12.7229	13.3608	10.6788	10.7979	10.913	0.362454	0.128463	0.0296794	0.203597	0.306961	0.313504	4556.26	3873.95	3617.51	4081.1	4384.3	4404.23	3499.12	3542.48	3589.88	4576	3853	3785	4146	4663	4455	3406	3359	3405
Camsap2	NA	NA	NA	NA	940	28.1371	0.157154	0.28836	0.229897	0.0596027	0.000524705	0.00575784	0.45428	0.0153976	0.0680448	27.4179	27.8887	29.1923	31.3069	29.7503	28.8811	24.2924	26.3676	26.3874	0.158372	0.155858	0.227604	0.346602	0.282229	0.175431	9153.35	9137.41	9603.36	10429.1	9973.98	9262.23	7744.08	8415.88	8444.91	9193	9088	10048	10595	10608	9369	7538	7980	8010
Camta1	NM_001195565	100072	chr4	calmodulin binding transcription activator 1	363	48.9255	0.18242	0.245866	0.089559	0.0234107	0.00221635	0.266728	0.288111	0.0424123	0.615519	48.2491	52.3216	51.5927	53.3517	48.684	46.321	43.8922	46.9917	46.7473	0.136795	0.226615	0.212227	0.278707	0.155822	0.0200195	17394.7	18512.1	18328.4	19192.8	17625.6	16042.1	15110.1	16196.9	16156	17470	18412	19177	19498	18746	16227	14708	15358	15324
Cand1	NM_027994	71902	chr10	cullin associated and neddylation disassociated 1	749	31.2411	0.267713	0.137153	0.0500246	0.00336016	0.134047	0.585506	0.0932425	0.491313	0.843149	33.834	35.0348	29.3894	33.4279	31.0294	28.6276	27.7046	30.8807	30.2702	0.256008	0.279247	0.0316258	0.235479	0.137265	-0.0429749	11852.7	12045.1	10145.3	11685.2	10916.1	9633.95	9267.62	10342.7	10165.5	11904	11980	10615	11871	11610	9745	9021	9807	9642
Car10	NM_028296	72605	chr11	carbonic anhydrase 10	2361	30.459	-0.00114507	0.0546464	-0.268149	0.990535	0.570518	0.00585939	0.998957	0.851626	0.0687901	30.8784	31.9299	32.1708	33.0386	27.7272	24.831	32.4507	30.6451	34.5395	-0.0117976	0.00942739	0.0261169	0.0826256	-0.160976	-0.384104	4395.96	4461.12	4513.04	4693.36	3964.02	3395.86	4411.39	4171.03	4713.76	4415	4437	4722	4768	4216	3435	4294	3955	4471
Car13	NM_024495	71934	chr3	carbonic anhydrase 13	9423	4.62476	-0.522797	-0.778832	-0.526078	0.0109396	0.000178413	0.010394	0.196487	0.00706595	0.105174	4.12038	4.3231	3.4008	3.65994	2.99656	5.55944	5.91068	7.02719	5.90758	-0.543128	-0.501018	-0.840464	-0.716741	-0.995287	-0.169722	404.249	416.251	328.772	358.301	295.216	523.962	553.739	659.138	555.621	406	414	344	364	314	530	539	625	527
Car4	NM_007607	12351	chr11	carbonic anhydrase 4	12266	1.28456	-0.0382848	-1.071	-1.1677	0.910896	0.00321872	0.0014252	0.984806	0.0552569	0.0250863	1.52555	1.82821	1.08395	0.551227	0.658192	0.890414	2.32716	1.41174	1.60576	-0.15771	0.0738018	-0.664581	-1.60007	-1.3429	-0.979282	84.6328	99.5384	59.2638	30.5099	36.6583	47.4531	123.276	74.8911	85.4066	85	99	62	31	39	48	120	71	81
Car5b	NM_181315	56078	chrX	carbonic anhydrase 5b, mitochondrial	8986	3.60712	-0.0422548	-1.1085	-0.652568	0.82994	7.77309e-08	0.00120591	0.978333	1.38885e-05	0.0221275	3.99801	4.97676	1.99669	2.27875	2.11828	3.84559	4.54658	5.09632	4.69997	-0.193599	0.0948022	-1.21401	-1.00589	-1.10183	-0.307417	588.45	718.888	289.586	334.677	313.081	543.734	639.008	717.144	663.157	591	715	303	340	333	550	622	680	629
Car8	NM_007592	12319	chr4	carbonic anhydrase 8	7426	3.69143	0.380068	0.137654	-0.170019	0.00263717	0.279895	0.187761	0.0812912	0.661509	0.533261	3.98787	4.9633	3.89657	3.65605	2.94473	3.21988	3.52917	3.33387	3.81031	0.228406	0.516741	0.173818	0.100099	-0.202493	-0.137727	973.781	1189.43	937.587	890.832	722.092	755.293	822.9	778.318	891.936	978	1183	981	905	768	764	801	738	846
Card14	NM_130886	170720	chr11	caspase recruitment domain family, member 14	11321	1.22836	0.183139	0.513461	1.18225	0.406471	0.0176231	2.01854e-08	0.859448	0.16849	1.8575e-06	1.01981	0.849153	1.20588	1.1447	1.78489	1.99235	0.974549	0.855532	0.729256	0.319763	0.0303473	0.539117	0.482414	1.12975	1.22408	172.254	140.762	200.704	192.93	302.748	323.273	157.182	138.16	118.092	173	140	210	196	322	327	153	131	112
Carhsp1	NM_025821	52502	chr16	calcium regulated heat stable protein 1	1456	54.9111	0.0380972	0.118784	0.321661	0.665652	0.176785	0.000236993	0.94852	0.551538	0.00604068	53.24	49.6145	52.8353	55.8548	59.3043	67.1658	50.8288	50.4456	54.4013	0.101034	-0.0277701	0.0688013	0.167083	0.262719	0.378265	6472.96	5920.01	6329.92	6776.24	7240.72	7844.58	5901.03	5863.7	6340.54	6501	5888	6623	6884	7701	7935	5744	5560	6014
Cars	NM_013742	27267	chr7	cysteinyl-tRNA synthetase	7017	8.14686	0.282789	0.172735	0.407334	0.0173187	0.147329	0.000564686	0.246396	0.510671	0.0118376	8.45222	8.38985	7.98883	7.60424	9.8002	8.68737	7.48779	6.76434	7.25552	0.301331	0.263603	0.19885	0.145844	0.520702	0.282988	1072.35	1044.65	998.755	962.689	1248.63	1058.79	907.141	820.502	882.45	1077	1039	1045	978	1328	1071	883	778	837
Cask	NM_009806	12361	chrX	calcium/calmodulin-dependent serine protein kinase (MAGUK family)	2697	10.9785	0.317329	0.186583	0.120856	0.00181177	0.067429	0.236981	0.064799	0.354479	0.587872	12.5458	11.8902	10.9053	11.3959	11.2748	10.2098	9.27811	10.3283	10.8673	0.368484	0.264006	0.145134	0.226725	0.220504	0.0133849	4429.81	4120.28	3794.32	4015.15	3997.87	3463.08	3128.25	3486.58	3678.44	4449	4098	3970	4079	4252	3503	3045	3306	3489
Caskin2	NM_080643	140721	chr11	CASK-interacting protein 2	7873	3.87938	0.101426	-0.549238	-0.0478922	0.529275	0.000898624	0.767436	0.912631	0.022674	0.917693	4.39758	4.38751	3.21523	2.37915	3.3128	4.70868	4.70368	3.93042	4.08784	0.116517	0.0861664	-0.355867	-0.771482	-0.285563	0.157135	886.161	867.693	638.442	478.389	670.374	911.494	905.085	757.226	789.674	890	863	668	486	713	922	881	718	749
Casp1	NM_009807	12362	chr9	caspase 1	10211	5.18362	-0.30351	-0.575942	-0.246378	0.128411	0.00438577	0.215275	0.626046	0.0690414	0.565906	4.37955	5.48998	4.53659	3.62094	4.13274	6.26394	6.3652	6.68003	5.85946	-0.459333	-0.161342	-0.429836	-0.735798	-0.536724	-0.00237202	282.774	347.881	288.636	233.287	267.953	388.522	392.445	412.359	362.685	284	346	302	237	285	393	382	391	344
Casp2	NM_007610	12366	chr6	caspase 2	10581	1.92719	-0.675735	-0.0991122	-0.313956	0.000157259	0.565061	0.0716677	0.0117149	0.848864	0.333128	1.30707	1.51819	2.19864	2.00921	1.7676	1.89413	2.4461	2.27661	2.28467	-0.77033	-0.582304	-0.0442432	-0.155743	-0.330784	-0.295174	193.163	220.191	320.174	296.286	262.319	268.9	345.187	321.665	323.674	194	219	335	301	279	272	336	305	307
Cat	NM_009804	12359	chr2	catalase	1288	67.2942	0.0360685	-0.140922	-0.241753	0.663665	0.0908884	0.00383674	0.947762	0.412126	0.051631	71.706	72.6885	65.2528	62.3614	58.4315	61.7395	77.372	68.8018	72.6064	0.0398069	0.0323609	-0.117455	-0.164718	-0.249421	-0.234003	7806.19	7766	6999.9	6774.27	6387.93	6456.58	8043.03	7160.89	7577.23	7840	7724	7324	6882	6794	6531	7829	6790	7187
Cav1	NM_007616	12389	chr6	caveolin 1, caveolae protein	3470	26.7422	-0.138167	-0.17401	-0.440836	0.377001	0.266275	0.00523696	0.850546	0.651299	0.063942	22.242	32.3226	26.1651	26.9137	17.9183	26.8171	28.0553	33.5032	31.5664	-0.416724	0.0952785	-0.203677	-0.144883	-0.722358	-0.204883	2397.61	3419.49	2779.31	2894.96	1939.69	2776.99	2887.85	3452.83	3262	2408	3401	2908	2941	2063	2809	2811	3274	3094
Cbl	NM_007619	12402	chr9	Casitas B-lineage lymphoma	5563	7.34568	0.572179	0.227983	0.0650747	0.000153155	0.134392	0.670564	0.0116874	0.49147	0.881078	9.59348	8.63828	5.62052	8.71794	6.54351	6.39534	6.67595	6.58044	5.80528	0.658276	0.479978	-0.133809	0.517169	0.112683	0.0156821	2080.99	1838.95	1201.37	1886.99	1425.39	1332.64	1382.8	1364.68	1207.18	2090	1829	1257	1917	1516	1348	1346	1294	1145
Cblb	NM_001033238	208650	chr16	Casitas B-lineage lymphoma b	4538	7.86072	0.0966422	0.274618	0.350185	0.326275	0.00497447	0.000329924	0.825109	0.0752788	0.00790996	7.08962	7.53392	7.90915	8.6109	9.04381	8.51781	6.91086	7.26973	7.06043	0.0659662	0.126549	0.20248	0.343177	0.423104	0.272692	1912.71	1994.79	2102.64	2318.13	2450.24	2207.55	1780.38	1875.12	1826.05	1921	1984	2200	2355	2606	2233	1733	1778	1732
Cbx2	NM_007623	12416	chr11	chromobox homolog 2 (Drosophila Pc class)	11470	1.07543	-1.16068	-0.11404	-0.0851297	1.43399e-06	0.611449	0.704001	0.000381839	0.870666	0.894657	0.592655	0.577703	1.34302	1.07545	1.36097	1.12194	1.28077	1.25097	1.53664	-1.12211	-1.18536	0.0285195	-0.272341	0.0747717	-0.266145	94.59	90.4899	211.22	171.274	218.134	172.015	195.198	190.894	235.107	95	90	221	174	232	174	190	181	223
Cbx8	NM_013926	30951	chr11	chromobox homolog 8 (Drosophila Pc class)	11381	3.10073	-0.606589	-0.688522	-0.607534	0.00520104	0.00156933	0.0050387	0.125668	0.0335157	0.0622501	2.76365	2.68848	2.70844	2.43937	2.28375	3.23731	4.37978	4.30504	4.21815	-0.571092	-0.637532	-0.621143	-0.753103	-0.838514	-0.401785	164.288	156.849	158.652	144.697	136.322	184.869	248.618	244.677	240.385	165	156	166	147	145	187	242	232	228
Cc2d2a	NM_172274	231214	chr5	coiled-coil and C2 domain containing 2A	10184	1.41801	-0.262534	-0.651708	-0.773938	0.141396	0.000344295	2.44052e-05	0.653523	0.011221	0.000963641	1.52006	1.54641	1.33891	1.00117	0.950226	1.22591	1.89232	1.86905	1.95331	-0.260829	-0.263109	-0.46451	-0.864284	-0.930188	-0.627877	353.469	352.909	306.797	232.303	221.885	273.843	420.184	415.526	435.428	355	351	321	236	236	277	409	394	413
Ccar1	NM_026201	67500	chr10	cell division cycle and apoptosis regulator 1	4734	10.3632	-0.06065	0.386628	0.304881	0.578537	0.000322987	0.00465981	0.926875	0.010808	0.0586106	8.83152	8.72778	12.4096	11.5167	12.2192	10.5552	9.79047	8.85487	9.80671	-0.0387164	-0.0828153	0.430534	0.340964	0.435545	0.160442	1687.69	1636.85	2336.8	2196.07	2344.94	1937.66	1786.54	1617.8	1796.52	1695	1628	2445	2231	2494	1960	1739	1534	1704
Ccdc117	NM_134033	104479	chr11	coiled-coil domain containing 117	6939	7.04588	-0.561011	0.00797096	0.0682413	6.24882e-06	0.947382	0.571094	0.001029	0.98784	0.835411	5.03546	5.23052	7.49804	7.71438	7.88309	8.133	6.9606	7.91197	8.65361	-0.57454	-0.546824	-0.0220125	0.0370915	0.0774547	0.0584733	730.834	745.029	1072.35	1117.23	1148.96	1133.93	964.675	1097.87	1204.01	734	741	1122	1135	1222	1147	939	1041	1142
Ccdc152	NM_001166063	100039139	chr15	coiled-coil domain containing 152	12455	1.06256	0.0265217	1.23689	0.559612	0.951472	0.00213467	0.180169	0.992073	0.0410376	0.52401	0.760187	0.691924	1.33862	2.02772	1.2647	0.846153	0.631852	0.939368	0.6459	0.100698	-0.0556732	0.872552	1.47916	0.819614	0.193707	25.8877	23.1257	44.9097	68.9055	43.2556	27.6782	20.5519	30.5776	21.0953	26	23	47	70	46	28	20	29	20
Ccdc50	NM_026202	67501	chr16	coiled-coil domain containing 50	2632	13.4069	0.028773	0.673708	0.135155	0.846694	4.53193e-06	0.362378	0.982172	0.000410994	0.70197	10.2926	12.9679	16.6907	19.5906	14.617	10.5134	10.4221	12.1609	12.7986	-0.132444	0.173721	0.54359	0.792775	0.379543	-0.159758	3055.76	3778.43	4882.92	5803.71	4357.98	2998.44	2954.63	3451.78	3642.59	3069	3758	5109	5896	4635	3033	2876	3273	3455
Ccdc65	NM_153518	105833	chr15	coiled-coil domain containing 65	12042	1.28669	-0.481597	-0.769954	-0.313536	0.0601138	0.00316904	0.214508	0.457062	0.0545538	0.565717	1.16846	1.18947	1.01713	0.911338	1.26238	1.41326	1.67893	1.65256	1.78491	-0.477218	-0.478563	-0.696057	-0.834574	-0.360878	-0.262876	93.5942	93.5061	80.2808	72.8397	101.538	108.746	128.42	126.561	137.061	94	93	84	74	108	110	125	120	130
Ccdc71l	NA	NA	NA	NA	8022	4.1644	-0.449733	-0.0386149	0.156165	0.00102036	0.773214	0.239947	0.0441462	0.941833	0.590664	2.93684	3.42046	4.44714	3.99453	4.98463	4.75923	4.15631	4.61608	4.7077	-0.548642	-0.356141	0.0278277	-0.108726	0.219513	0.0888823	520.744	595.219	777.022	706.759	887.576	810.654	703.731	782.533	800.213	523	592	813	718	944	820	685	742	759
Ccdc9	NM_172297	243846	chr7	coiled-coil domain containing 9	8007	8.16139	0.121645	-0.0457848	0.341539	0.357893	0.73093	0.00911922	0.843424	0.924388	0.0962768	8.57177	7.57703	7.1422	7.23234	8.78394	10.2294	8.18805	7.56638	7.31941	0.220289	0.0155265	-0.0637809	-0.0276178	0.261581	0.417169	798.541	692.747	655.64	672.307	821.756	915.447	728.384	673.908	653.67	802	689	686	683	874	926	709	639	620
Ccdc90b	NM_025515	66365	chr7	coiled-coil domain containing 90B	8961	8.4974	-0.15379	-0.46093	-0.387129	0.362377	0.00704312	0.0231175	0.844219	0.0944745	0.175237	8.16773	9.59306	7.13483	7.19473	5.97689	9.32977	10.5298	10.0523	10.0912	-0.259414	-0.0547993	-0.475261	-0.445142	-0.702924	-0.125695	520.744	600.246	448.242	457.72	382.661	571.414	641.061	612.74	616.768	523	597	469	465	407	578	624	581	585
Ccl11	NM_011330	20292	chr11	chemokine (C-C motif) ligand 11	9880	8.68685	-0.399313	0.000241804	0.884747	0.207064	0.999381	0.00382779	0.729102	0.999502	0.0515726	4.45763	6.91341	6.58752	8.3588	20.0791	7.50655	7.40114	8.19068	7.66177	-0.731243	-0.127611	-0.191249	0.169393	1.44073	-0.0400184	204.115	310.68	297.23	381.927	923.327	330.189	323.615	358.574	336.325	205	309	311	388	982	334	315	340	319
Ccl12	NM_011331	20293	chr11	chemokine (C-C motif) ligand 12	12456	1.63279	1.08879	-1.56019	1.82882	0.101288	0.0416681	0.0054397	0.571256	0.273597	0.0654595	0.783534	3.04563	0.381627	0.215634	0.777715	5.75889	0.893669	1.20564	0.673133	-0.165363	1.70895	-1.14335	-1.84215	-0.171966	2.58766	17.9204	68.3676	8.60569	4.91792	17.834	126.548	19.5225	26.3578	14.7746	18	68	9	5	19	128	19	25	14
Ccl2	NM_011333	20296	chr11	chemokine (C-C motif) ligand 2	11935	3.82137	0.646313	1.64167	1.34046	0.0728003	2.95411e-06	0.000145173	0.500822	0.000291108	0.00401068	2.63425	3.09765	8.43136	3.01138	4.70915	4.63757	2.18953	1.86009	1.6307	0.533514	0.738125	2.17994	0.721416	1.37066	1.28509	90.6069	104.566	285.782	103.35	162.656	153.232	71.9128	61.1735	53.7792	91	104	299	105	173	155	70	58	51
Ccl5	NM_013653	20304	chr11	chemokine (C-C motif) ligand 5	12296	3.28525	-2.5697	-1.86085	-1.70669	5.95974e-05	0.00232272	0.004816	0.00577695	0.0435162	0.0599723	0.92273	1.08505	1.54088	1.74132	1.61139	2.08909	5.36503	11.9265	1.31041	-2.62669	-2.42875	-1.93441	-1.7448	-1.8452	-1.54172	20.9088	24.1307	34.401	39.3733	36.6592	45.4758	116.094	258.343	28.4941	21	24	36	40	39	46	113	245	27
Ccl8	NM_021443	20307	chr11	chemokine (C-C motif) ligand 8	12390	2.52224	-1.64631	-1.88668	-1.0042	0.0038915	0.00110989	0.0668867	0.103843	0.0264074	0.32141	1.18714	1.4094	1.33433	0.859497	2.10381	1.98209	3.15753	8.14415	1.3617	-1.72691	-1.51398	-1.58455	-2.17571	-0.919067	-1.06569	25.8873	30.1633	28.6756	18.699	46.0686	41.52	65.757	169.755	28.4926	26	30	30	19	49	42	64	161	27
Ccl9	NM_011338	20308	chr11	chemokine (C-C motif) ligand 9	11798	1.17846	-0.0277684	0.963501	1.42257	0.938485	0.00549456	3.59303e-05	0.99025	0.0803323	0.00129587	0.50418	0.838002	1.26938	1.39095	2.09332	1.58738	0.678883	1.06558	0.376975	-0.417828	0.279605	0.879872	1.0291	1.62529	1.1641	64.7185	105.57	160.56	178.166	269.849	195.741	83.2176	130.755	46.4106	65	105	168	181	287	198	81	124	44
Ccnd1	NM_007631	12443	chr7	cyclin D1	5314	10.3185	-0.249687	-1.17634	-0.177968	0.338361	1.31916e-05	0.494031	0.833719	0.000906972	0.79368	10.2646	10.7196	6.55017	4.488	6.2652	16.1934	13.522	14.5451	10.6928	-0.267409	-0.231934	-0.936189	-1.46293	-0.973052	0.332082	1662.8	1704.22	1045.59	725.46	1019.19	2519.96	2091.66	2252.67	1660.53	1670	1695	1094	737	1084	2549	2036	2136	1575
Ccnd2	NM_009829	12444	chr6	cyclin D2	10295	1.30535	-0.882503	-1.15947	-0.123929	0.00273622	0.000102507	0.664087	0.0833183	0.0045981	0.87839	0.832849	1.05661	0.811293	0.74503	0.882	2.37351	1.71247	2.02903	1.6657	-1.04599	-0.731121	-1.10477	-1.20903	-0.957751	0.402521	205.111	255.381	196.882	183.087	218.111	561.531	402.72	477.743	393.26	206	254	206	186	232	568	392	453	373
Ccng2	NM_007635	12452	chr5	cyclin G2	5483	14.9724	-0.257589	0.492776	0.170106	0.0833914	0.000705746	0.245937	0.528695	0.0189537	0.59662	11.2637	11.5606	19.2833	19.0748	18.4737	12.3381	13.1917	14.5931	14.601	-0.262703	-0.252252	0.491249	0.493686	0.456708	-0.189272	1198.81	1207.53	2022.36	2025.78	1974.49	1261.46	1340.68	1484.91	1489.72	1204	1201	2116	2058	2100	1276	1305	1408	1413
Ccnl1	NM_019937	56706	chr3	cyclin L1	9155	5.73853	0.246282	0.572912	0.461231	0.251555	0.00706833	0.0305535	0.764251	0.0946097	0.208607	4.42708	6.23392	7.80911	5.53921	7.56896	4.82307	4.80711	4.69979	4.4334	-0.00567076	0.460057	0.790403	0.313829	0.772684	0.0598141	405.244	560.028	704.389	505.951	695.779	424.108	420.183	411.307	389.042	407	557	737	514	740	429	409	390	369
Ccr2	NM_009915	12772	chr9	chemokine (C-C motif) receptor 2	11187	1.46709	-1.37733	-0.959741	-0.572888	0.0016857	0.0254193	0.175068	0.062628	0.209087	0.518941	0.507074	1.05686	1.09556	0.985439	0.855827	1.91498	2.05115	3.26981	0.97657	-1.97101	-0.947966	-0.890601	-1.02446	-1.21754	-0.125206	77.6622	158.858	165.342	150.603	131.612	281.755	299.986	478.777	143.408	78	158	173	153	140	285	292	454	136
Ccrn4l	NM_009834	12457	chr3	CCR4 carbon catabolite repression 4-like (S. cerevisiae)	7021	7.8705	0.00177961	0.0423463	0.344762	0.988695	0.735314	0.00537816	0.998957	0.926006	0.0649906	7.13869	7.29042	7.37605	7.44923	8.12107	10.3879	7.07285	8.12777	7.18811	5.86383e-05	0.00331965	0.0259856	0.0583151	0.191945	0.482847	934.95	937.068	951.922	973.517	1068.09	1306.94	884.542	1017.71	902.483	939	932	996	989	1136	1322	861	965	856
Ccser1	NA	NA	NA	NA	10373	1.32681	0.389596	0.48387	0.279077	0.02883	0.00633465	0.118612	0.319299	0.0881847	0.425093	1.42024	1.42704	1.48085	1.55564	1.29633	1.36461	0.990074	1.07973	1.30651	0.398125	0.377998	0.437058	0.526029	0.272872	0.282888	339.529	334.811	348.844	371.098	311.212	313.387	226.019	246.788	299.418	341	333	365	377	331	317	220	234	284
Cd14	NM_009841	12475	chr18	CD14 antigen	11670	2.57983	0.451242	1.37471	1.96948	0.237483	0.00022967	1.1719e-07	0.753576	0.00855454	8.52693e-06	1.48065	1.6678	2.61137	3.35081	6.84426	2.14251	1.24623	1.29503	1.03292	0.373301	0.516515	1.16416	1.54005	2.57624	0.844142	94.5897	104.566	164.381	213.603	439.11	131.479	76.0245	79.0977	63.2677	95	104	172	217	467	133	74	75	60
Cd163	NM_053094	93671	chr6	CD163 antigen	11009	1.29126	-0.559404	0.945357	0.503451	0.0719266	0.00135618	0.0908925	0.500435	0.03004	0.371025	0.555769	0.801651	1.67475	2.16648	1.92925	0.90191	1.19544	1.10485	0.803205	-0.826025	-0.328549	0.735185	1.12367	0.966008	-0.190314	106.538	150.815	316.345	414.41	371.405	166.082	218.822	202.489	147.615	107	150	331	421	395	168	213	192	140
Cd38	NM_007646	12494	chr5	CD38 antigen	11042	1.9082	-0.562948	0.116133	0.84901	0.022333	0.624839	0.000246331	0.281801	0.877069	0.00624056	0.958205	1.21837	1.57085	1.90639	2.46135	3.39789	1.77613	1.97642	1.23909	-0.727031	-0.409874	-0.0396212	0.256493	0.632881	1.03299	122.469	152.826	197.833	243.133	315.907	417.191	216.769	241.505	151.833	123	152	207	247	336	422	211	229	144
Cd44	NM_009851	12505	chr2	CD44 antigen	463	67.5002	0.203589	0.470383	0.494964	0.0254904	2.12317e-07	4.71701e-08	0.300701	3.24042e-05	3.98872e-06	59.4381	65.9868	71.6767	78.9679	80.4305	74.1397	52.6403	56.7216	59.7561	0.140388	0.264091	0.389259	0.547128	0.582797	0.401281	13402.9	14603	15926.6	17768.4	18213.2	16059.9	11334.6	12228.3	12917.2	13461	14524	16664	18051	19371	16245	11033	11595	12252
Cd47	NM_010581	16423	chr16	CD47 antigen (Rh-related antigen, integrin-associated signal transducer)	2216	57.8591	0.212134	0.338725	0.182027	0.0863928	0.00603008	0.14136	0.535781	0.0852505	0.466268	57.3911	58.7626	52.3789	74.1667	58.827	55.803	51.1989	54.3447	50.2232	0.208584	0.215576	0.0555465	0.575348	0.250306	0.110173	4687.69	4710.47	4215.8	6044.87	4825.27	4378.53	3993.27	4243.8	3932.53	4708	4685	4411	6141	5132	4429	3887	4024	3730
Cd52	NM_013706	23833	chr4	CD52 antigen	11817	6.90866	-1.12839	-1.48742	-0.650722	0.032397	0.00558551	0.207333	0.339287	0.0811878	0.556949	3.06144	5.87044	4.87997	2.06803	4.53625	8.05444	9.17215	17.6265	3.48401	-1.64152	-0.739489	-0.997789	-2.20032	-1.07547	-0.31698	65.714	123.668	103.231	44.29	97.7679	166.087	188.007	361.705	71.7186	66	123	108	45	104	168	183	343	68
Cd55	NM_010016	13136	chr1	CD55 antigen	249	207.521	-0.0192198	0.042913	-0.281939	0.810635	0.592054	0.000483464	0.972513	0.863584	0.010432	204.925	220.908	229.242	214.852	179.01	178.784	213.015	219.428	237.717	-0.0604282	0.0208355	0.0801078	0.00470222	-0.249399	-0.315244	22090.3	23370.4	24350.6	23110.5	19378.2	18513.6	21926.5	22614.2	24565.1	22186	23244	25478	23478	20610	18727	21343	21443	23300
Cd63	NM_007653	12512	chr10	CD63 antigen	3005	87.3246	-0.114931	0.351002	0.6686	0.260532	0.000490261	2.3072e-11	0.771513	0.0147491	3.95542e-09	62.326	70.9987	98.3108	85.6274	113.013	118.396	80.353	69.5718	74.2435	-0.197466	-0.0366452	0.438616	0.257505	0.666939	0.670043	2500.17	2795.12	3886.07	3427.49	4552.6	4562.41	3077.91	2668.2	2855.04	2511	2780	4066	3482	4842	4615	2996	2530	2708
Cd74	NM_010545	16149	chr18	CD74 antigen (invariant polypeptide of major histocompatibility complex, class II antigen-associated)	2434	72.5402	-0.553573	-0.883172	-1.0492	0.0271741	0.000496585	3.95699e-05	0.310862	0.0148678	0.00140687	53.853	79.7058	50.082	55.8704	42.1894	53.4117	103.16	142.05	58.9008	-0.84766	-0.309217	-0.973586	-0.79773	-1.19361	-0.917456	3251.91	4723.54	2980.02	3366.46	2558.36	3098.29	5948.29	8200.72	3409.61	3266	4698	3118	3420	2721	3134	5790	7776	3234
Cd83	NM_009856	12522	chr13	CD83 antigen	11386	2.0087	-0.339347	-0.412712	-1.05761	0.122323	0.0608444	4.04142e-06	0.613316	0.335448	0.000209869	1.84171	2.30985	2.05943	1.87864	1.35266	1.18268	2.40216	3.04246	2.70834	-0.494795	-0.196709	-0.355623	-0.469416	-0.930932	-1.18646	168.27	207.12	185.413	171.274	124.11	103.802	209.582	265.764	237.221	169	206	194	174	132	105	204	252	225
Cd93	NM_010740	17064	chr2	CD93 antigen	9573	1.5683	-0.258869	0.112059	0.500167	0.115248	0.486489	0.00159549	0.598627	0.806597	0.027278	1.07907	1.32005	1.56816	1.52876	2.21447	1.86732	1.4888	1.47975	1.48696	-0.395594	-0.132661	0.121026	0.102483	0.645232	0.335759	305.675	366.985	437.73	432.127	629.956	508.141	402.719	400.761	403.8	307	365	458	439	670	514	392	380	383
Cdc14b	NM_172587	218294	chr13	CDC14 cell division cycle 14 homolog B (S. cerevisiae)	6633	4.78202	0.111807	0.201606	0.420013	0.410772	0.136501	0.00178781	0.859667	0.494445	0.0295959	4.49123	4.52674	5.02088	4.56948	6.42311	4.79721	4.17252	4.25501	4.53706	0.119489	0.103788	0.258962	0.141273	0.641325	0.156588	1072.35	1060.74	1181.3	1088.69	1540.1	1100.31	951.318	971.312	1038.48	1077	1055	1236	1106	1638	1113	926	921	985
Cdc42ep4	NM_020006	56699	chr11	CDC42 effector protein (Rho GTPase binding) 4	4947	14.7896	-0.279242	-0.0908793	0.449998	0.0108379	0.402995	2.51283e-05	0.195723	0.75602	0.000988931	11.8324	11.5386	14.4984	12.1233	18.6011	20.5194	15.5684	13.6356	14.8641	-0.247737	-0.311046	0.0240185	-0.215828	0.410633	0.488173	1486.56	1422.69	1794.9	1519.83	2346.81	2476.45	1867.7	1637.83	1790.2	1493	1415	1878	1544	2496	2505	1818	1553	1698
Cdca4	NM_028023	71963	chr12	cell division cycle associated 4	11122	2.15145	-0.598581	0.282797	0.221389	0.00338474	0.143572	0.25345	0.0935099	0.505429	0.604407	1.25388	1.54818	2.62138	2.53234	2.5486	2.43247	2.09483	2.17989	2.31186	-0.7397	-0.464533	0.297279	0.26567	0.284021	0.153235	129.439	156.848	266.651	260.85	264.202	241.218	206.498	215.148	228.785	130	156	279	265	281	244	201	204	217
Cdh10	NM_009865	320873	chr15	cadherin 10	8718	3.9965	0.111872	-0.251294	-0.541056	0.459559	0.101595	0.000512324	0.880826	0.43558	0.0109229	4.4334	5.16798	3.71792	3.73386	2.65468	3.51992	4.24254	4.50172	5.04832	0.0114839	0.20531	-0.263205	-0.238954	-0.720868	-0.378638	644.209	736.986	532.348	541.389	387.365	491.337	588.669	625.396	703.216	647	733	557	550	412	497	573	593	667
Cdh11	NM_009866	12552	chr8	cadherin 11	1530	34.7963	0.03952	-0.222039	-0.322826	0.668136	0.0168175	0.000531328	0.94852	0.16388	0.0113088	36.7079	40.5655	30.9653	33.3909	28.8193	31.8373	35.7353	40.3489	40.6621	-0.0202312	0.0968363	-0.286854	-0.159955	-0.363146	-0.283507	6604.39	7162.73	5489.82	5994.67	5207	5502.57	6139.38	6940.47	7013.18	6633	7124	5744	6090	5538	5566	5976	6581	6652
Cdh20	NM_011800	23836	chr1	cadherin 20	10356	2.01572	0.0878409	-0.629435	-0.164995	0.627773	0.00081267	0.367516	0.93792	0.0211887	0.705837	2.30059	2.34779	1.5266	1.29802	1.66228	2.28714	2.40458	2.29875	2.09107	0.0866175	0.0888316	-0.524218	-0.739147	-0.374714	0.0203947	365.417	365.98	238.936	205.726	265.134	348.978	364.706	349.084	318.405	367	364	250	209	282	353	355	331	302
Cdk12	NM_026952	69131	chr11	cyclin-dependent kinase 12	5880	4.2656	0.0236786	-0.353206	0.0783808	0.842654	0.00351188	0.509962	0.981242	0.0587582	0.804206	4.52095	4.47016	3.60673	3.31261	4.11674	5.32997	4.36235	4.40532	4.97349	0.0451101	0.00176094	-0.301793	-0.406303	-0.0838517	0.224549	1479.59	1435.76	1163.14	1081.79	1352.98	1675.68	1363.28	1378.4	1560.36	1486	1428	1217	1099	1439	1695	1327	1307	1480
Cdk5r1	NM_009871	12569	chr11	cyclin-dependent kinase 5, regulatory subunit 1 (p35)	3990	14.0448	0.0707637	-0.0170558	-0.304088	0.447687	0.855133	0.00128484	0.876641	0.962756	0.0231697	15.0579	15.0696	14.3053	14.0183	11.3201	12.1277	15.7339	14.7252	14.1076	0.0837107	0.0577553	-0.0114522	-0.0225716	-0.321667	-0.286299	2656.49	2609.11	2486.86	2467.75	2005.51	2055.31	2650.53	2483.64	2385.88	2668	2595	2602	2507	2133	2079	2580	2355	2263
Cdkn1a	NM_007669	12575	chr17	cyclin-dependent kinase inhibitor 1A (P21)	3122	41.4935	0.24141	1.23157	1.07916	0.113399	2.73474e-16	7.6411e-13	0.594043	4.27816e-13	1.64876e-10	28.9359	30.0457	57.4657	59.557	64.7313	41.0185	26.1875	24.0063	27.3022	0.227653	0.25486	1.19597	1.26564	1.39501	0.67296	2390.64	2436.17	4678.39	4909.92	5370.61	3255.47	2065.98	1896.22	2162.36	2401	2423	4895	4988	5712	3293	2011	1798	2051
Cdkn2aip	NM_172407	70925	chr8	CDKN2A interacting protein	9062	3.46928	-0.492222	0.0851088	-0.0278976	0.0022278	0.586158	0.859004	0.073655	0.860299	0.951178	2.37726	2.91324	4.15661	3.72475	3.79268	3.5545	3.51394	3.72122	4.3149	-0.630219	-0.364654	0.152953	0.0130466	0.0482474	-0.109057	354.464	426.305	610.722	554.185	567.898	509.13	500.318	530.481	616.762	356	424	639	563	604	515	487	503	585
Cdo1	NM_033037	12583	chr18	cysteine dioxygenase 1, cytosolic	8108	11.0764	-0.119044	0.279201	-0.376376	0.367654	0.0314011	0.00486326	0.847028	0.234605	0.0604906	9.531	11.2345	13.2357	14.0811	8.21665	9.31515	11.8969	11.0998	12.0098	-0.227532	-0.0176824	0.224346	0.33167	-0.435187	-0.318379	622.304	719.893	851.568	917.41	538.746	584.265	741.74	692.893	751.716	625	716	891	932	573	591	722	657	713
Cdr2	NM_007672	12585	chr7	cerebellar degeneration-related 2	2399	40.6499	0.0522202	0.150658	0.336804	0.543217	0.0783796	7.64526e-05	0.91744	0.382502	0.00237421	37.4845	38.1027	41.2058	39.647	46.3568	46.4823	37.1471	38.7732	37.3297	0.0539317	0.0504518	0.169228	0.131718	0.366431	0.306313	4037.51	4027.78	4373.51	4261.23	5014.26	4809.56	3820.67	3992.8	3854.51	4055	4006	4576	4329	5333	4865	3719	3786	3656
Cds2	NM_138651	110911	chr2	CDP-diacylglycerol synthase (phosphatidate cytidylyltransferase) 2	48	1129.29	0.118807	0.249441	0.279592	0.186491	0.00541933	0.00181515	0.708112	0.0796043	0.0299573	1127.38	1043.35	1107.61	1266.53	1288.8	1156.22	1003.98	1040.5	1062.39	0.186545	0.0477201	0.139794	0.351339	0.385684	0.165043	59849.8	54359	57941.3	67092.1	68708.4	58964.3	50894.3	52810.2	54066.4	60109	54065	60624	68159	73076	59644	49540	50075	51282
Cdyl	NM_009881	12593	chr13	chromodomain protein, Y chromosome-like	8375	4.59759	0.0109958	0.223174	0.63611	0.934224	0.090154	9.11148e-07	0.989764	0.40939	5.5087e-05	3.71467	4.09412	4.35807	4.67423	6.13191	6.00432	3.83071	3.9727	4.23034	-0.046717	0.0663288	0.162146	0.28113	0.681417	0.587163	545.636	590.192	630.789	685.104	904.5	847.233	537.301	557.9	595.679	548	587	660	696	962	857	523	529	565
Cebpb	NM_009883	12608	chr2	CCAAT/enhancer binding protein (C/EBP), beta	10209	5.43004	-0.167768	0.489213	1.14396	0.455337	0.0251207	1.01852e-07	0.87956	0.208219	7.54251e-06	3.12014	3.76391	5.58468	5.25363	10.5652	6.56103	4.33468	4.25705	3.41242	-0.29324	-0.0507981	0.522309	0.45247	1.46747	0.717526	202.124	239.294	356.491	339.598	687.317	408.291	268.136	263.657	211.924	203	238	373	345	731	413	261	250	201
Cebpd	NM_007679	12609	chr16	CCAAT/enhancer binding protein (C/EBP), delta	7825	8.80338	0.267216	1.65642	2.22593	0.18359	2.30814e-17	5.56362e-30	0.704794	4.12663e-14	3.86826e-27	4.08824	4.29147	11.6255	10.3101	20.1147	12.5592	4.38402	3.05382	3.37537	0.245353	0.288162	1.72951	1.57455	2.54722	1.80418	394.292	406.197	1104.84	992.219	1948.17	1163.58	403.742	281.595	312.079	396	404	1156	1008	2072	1177	393	267	296
Cebpg	NM_009884	12611	chr7	CCAAT/enhancer binding protein (C/EBP), gamma	4490	10.5145	-0.353456	0.0780636	0.236243	0.000753231	0.448903	0.0212558	0.0370714	0.787306	0.16533	7.72602	8.60813	11.9441	10.0635	12.2624	12.5193	10.5144	10.4781	11.4113	-0.419132	-0.290317	0.187814	-0.0411321	0.25304	0.21894	1550.28	1695.17	2361.66	2014.95	2470.93	2413.18	2014.61	2010.11	2195.05	1557	1686	2471	2047	2628	2441	1961	1906	2082
Celf2	NA	NA	NA	NA	3592	7.50386	0.137832	0.429874	0.0276742	0.214916	9.67008e-05	0.803879	0.733682	0.00438482	0.931114	6.88741	7.82075	8.69676	9.28081	7.24888	6.4656	6.21026	7.42038	7.12479	0.0575093	0.21372	0.372687	0.484545	0.137357	-0.0915578	2604.72	2902.7	3240.94	3502.3	2753	2348.92	2242.68	2682.96	2583.03	2616	2887	3391	3558	2928	2376	2183	2544	2450
Celsr2	NM_017392	53883	chr3	cadherin, EGF LAG seven-pass G-type receptor 2 (flamingo homolog, Drosophila)	4876	4.2501	0.341006	-0.233304	-0.0157483	0.00326334	0.0481336	0.893022	0.091498	0.294429	0.963086	5.62329	4.6497	3.64752	3.25373	4.12034	3.9731	4.55532	4.17779	3.87928	0.483652	0.18243	-0.161755	-0.308364	0.0412834	-0.0751766	2530.04	2053.1	1617.13	1460.77	1861.66	1717.2	1957.08	1797.08	1673.18	2541	2042	1692	1484	1980	1737	1905	1704	1587
Cep164	NM_001081373	214552	chr9	centrosomal protein 164	7974	3.20386	-0.0244666	-0.479205	-0.255607	0.870872	0.00177987	0.0922017	0.982172	0.0361023	0.373884	3.64348	3.35955	2.91555	2.1945	2.59455	3.44505	3.77612	3.70211	3.5924	0.0457266	-0.0982249	-0.296598	-0.687699	-0.437377	-0.092843	853.304	772.176	672.848	512.841	610.2	775.066	844.474	828.937	806.542	857	768	704	521	649	784	822	786	765
Cep170b	NA	NA	NA	NA	1515	23.1071	0.216861	0.156445	0.3882	0.0373325	0.133557	0.000182705	0.365013	0.490742	0.00480368	25.2751	20.8613	21.3589	22.8757	27.0711	25.3284	22.1544	19.9316	19.6468	0.360808	0.0568918	0.0967396	0.213822	0.465917	0.30591	7161.98	5801.37	5963.87	6468.14	7703.32	6894.53	5994.52	5399.67	5336.85	7193	5770	6240	6571	8193	6974	5835	5120	5062
Cep250	NM_177217	16328	chr2	centrosomal protein 250	5297	4.92369	0.479784	0.0244102	-0.00765394	1.1131e-05	0.825503	0.944941	0.00167837	0.957331	0.980797	6.55177	5.86852	4.5986	4.45686	4.70589	4.22026	4.66166	4.32596	4.85576	0.569469	0.383593	0.0378358	0.010804	0.0983837	-0.122633	2230.34	1960.6	1542.58	1513.92	1608.74	1380.09	1515.33	1407.93	1584.61	2240	1950	1614	1538	1711	1396	1475	1335	1503
Cep290	NM_146009	216274	chr10	centrosomal protein 290	8429	1.93563	0.462978	0.103526	-0.0992173	0.000398856	0.434845	0.458509	0.0236175	0.777108	0.766912	2.25858	2.58179	1.79985	1.96627	1.5867	1.71994	1.74769	1.8242	1.8799	0.377138	0.542812	0.0288624	0.174351	-0.125406	-0.0731827	771.657	865.682	605.94	670.339	544.389	564.492	570.176	595.866	615.712	775	861	634	681	579	571	555	565	584
Cep57	NR_037622	74360	chr9	centrosomal protein 57	8836	4.87314	0.131496	0.38687	0.0944064	0.37015	0.00762859	0.519952	0.84879	0.0994498	0.809364	4.25813	5.19903	5.94074	5.32935	4.82218	4.453	4.32083	4.66187	4.4169	-0.00481634	0.255657	0.453599	0.315241	0.180383	0.00177611	506.804	607.284	696.739	632.933	576.36	509.13	491.071	530.477	503.958	509	604	729	643	613	515	478	503	478
Cep95	NA	NA	NA	NA	11806	1.26437	-0.775826	-0.211457	0.0877192	0.00292766	0.39943	0.7224	0.0860085	0.754819	0.902016	0.844187	0.785441	1.15477	1.25456	1.41029	1.58727	1.80494	1.27354	1.2598	-0.706187	-0.835862	-0.279443	-0.142731	0.0340203	0.139952	93.5944	85.4628	126.153	138.792	157.012	169.051	191.082	135.001	133.905	94	85	132	141	167	171	186	128	127
Cers6	NA	NA	NA	NA	8678	3.65467	-0.0228545	-0.051208	0.482769	0.888515	0.753483	0.00253421	0.983169	0.932632	0.0383502	3.24747	3.2681	2.87426	3.50563	3.84643	5.5226	3.34221	3.63067	3.31159	-0.0139485	-0.0318567	-0.210938	0.0931078	0.235892	0.693112	544.641	537.909	475	586.67	647.808	889.745	535.246	582.153	532.425	547	535	497	596	689	900	521	552	505
Chac1	NM_026929	69065	chr2	ChaC, cation transport regulator-like 1 (E. coli)	10121	5.52328	0.184967	1.16744	1.82642	0.499088	1.18708e-05	5.8986e-12	0.899939	0.000848933	1.1185e-09	3.84902	2.47713	7.05003	5.47716	13.108	6.69701	2.76196	2.76599	3.13525	0.476328	-0.183315	1.32575	0.98049	2.24636	1.21515	257.883	162.882	465.45	366.174	881.95	431.028	176.705	177.183	201.371	259	162	487	372	938	436	172	168	191
Chadl	NM_001164320	214685	chr15	chondroadherin-like	9146	4.74809	-0.0654435	-0.653106	-0.30709	0.696253	0.000149695	0.069574	0.951489	0.00614242	0.328201	5.16857	5.15778	3.24941	3.61357	4.23111	4.58438	6.83248	5.14743	4.8081	-0.0501193	-0.080159	-0.739385	-0.568463	-0.332229	-0.280663	561.567	549.975	347.887	391.769	461.648	478.484	708.861	534.701	500.801	564	547	364	398	491	484	690	507	475
Chd2	NM_001081345	244059	chr7	chromodomain helicase DNA binding protein 2	5262	4.43404	0.219032	0.745337	0.339689	0.200734	1.07926e-05	0.0464799	0.724488	0.000794527	0.263516	3.93795	4.12596	5.60496	5.99369	5.56052	3.22478	3.48522	3.53922	3.73601	0.198651	0.238831	0.686407	0.801215	0.702235	-0.14729	1524.4	1567.48	2138.01	2315.18	2161.6	1199.17	1288.29	1309.84	1386.4	1531	1559	2237	2352	2299	1213	1254	1242	1315
Chd5	NM_029216	269610	chr4	chromodomain helicase DNA binding protein 5	3258	7.92594	0.328351	0.141066	0.0226932	0.0013502	0.170494	0.826079	0.0531378	0.543375	0.938495	9.24316	8.88058	7.26569	8.63242	7.52153	7.26162	7.39519	7.20734	7.82626	0.370012	0.285224	0.00160694	0.268307	0.0788187	-0.0359056	3697.98	3486.86	2864.37	3446.2	3021.9	2790.83	2825.18	2756.79	3001.58	3714	3468	2997	3501	3214	2823	2750	2614	2847
Chd8	NM_201637	67772	chr14	chromodomain helicase DNA binding protein 8	4595	5.88657	0.336361	0.0937435	-0.0539072	0.000762138	0.351595	0.59414	0.0370714	0.715017	0.847079	7.25596	6.54543	6.09411	5.56872	5.19964	5.42964	5.4916	5.50747	5.9913	0.421321	0.245638	0.148457	0.0365591	-0.0531353	-0.0547164	2536.02	2245.14	2098.82	1942.11	1824.99	1822.99	1832.77	1840.32	2007.38	2547	2233	2196	1973	1941	1844	1784	1745	1904
Chdh	NM_175343	218865	chr14	choline dehydrogenase	10971	0.964333	-0.337152	-1.03229	-0.830604	0.15725	2.94005e-05	0.000670747	0.673506	0.00171138	0.0137388	1.11045	1.00665	0.784141	0.523504	0.558974	0.96854	1.26233	1.50007	1.39527	-0.254743	-0.422734	-0.775568	-1.33674	-1.23388	-0.508909	267.84	238.289	186.374	125.993	135.378	224.415	290.741	345.917	322.619	269	237	195	128	144	227	283	328	306
Chka	NM_013490	12660	chr19	choline kinase alpha	3037	30.7967	0.0321844	0.430957	0.477816	0.782013	0.000181158	3.24755e-05	0.966838	0.00715201	0.00120603	26.9645	25.5146	34.9442	34.2032	40.4887	31.395	27.4277	25.4356	26.8898	0.08458	-0.0221974	0.437241	0.424438	0.676963	0.246054	3022.91	2807.18	3860.27	3826.15	4558.25	3381.03	2936.13	2726.2	2889.83	3036	2792	4039	3887	4848	3420	2858	2585	2741
Chl1	NM_007697	12661	chr6	cell adhesion molecule with homology to L1CAM	1955	15.7061	0.0657171	0.162553	0.330236	0.547824	0.136026	0.00236362	0.918772	0.494098	0.0364883	13.6512	16.0902	16.0161	15.7377	15.9135	20.1827	13.5438	14.5135	16.0527	-0.0431504	0.166886	0.166072	0.158896	0.184106	0.462905	4515.44	5223.25	5220.3	5194.39	5285.98	6413.08	4277.84	4589.72	5090.14	4535	5195	5462	5277	5622	6487	4164	4352	4828
Chmp5	NM_029814	76959	chr4	chromatin modifying protein 5	1782	94.5511	-0.202642	-0.131141	-0.269897	0.0429755	0.189141	0.00712879	0.388389	0.567608	0.0797922	82.2909	97.8118	101.58	87.4262	79.9873	93.5261	104.757	109.029	107.951	-0.317952	-0.0957967	-0.0354169	-0.233748	-0.352826	-0.191288	4818.13	5620.39	5860.65	5107.77	4703.03	5260.36	5856.86	6103.1	6059.04	4839	5590	6132	5189	5002	5321	5701	5787	5747
Chrdl1	NM_031258	83453	chrX	chordin-like 1	10380	1.8359	-0.185271	-0.362615	-0.795894	0.374785	0.0845533	0.000215076	0.850546	0.398488	0.00550444	1.58036	2.24103	1.68501	1.6853	1.1186	1.40772	2.39069	2.57852	1.77099	-0.441766	0.0335841	-0.370763	-0.352445	-0.932172	-0.665721	273.813	381.06	287.676	291.365	194.619	234.299	395.526	427.12	294.162	275	379	301	296	207	237	385	405	279
Chrnb3	NM_173212	108043	chr8	cholinergic receptor, nicotinic, beta polypeptide 3	8437	3.32718	0.149472	0.457365	0.215437	0.374189	0.00597204	0.198698	0.850546	0.0849318	0.547734	2.95907	3.47886	4.54164	3.4203	3.48053	3.30542	2.82929	2.60234	3.57733	0.0425034	0.248568	0.638506	0.248034	0.282362	0.144074	579.489	668.616	876.423	668.368	684.486	621.831	529.083	487.245	671.583	582	665	917	679	728	629	515	462	637
Chst10	NM_145142	98388	chr1	carbohydrate sulfotransferase 10	9566	3.27732	-0.494033	-0.539727	-0.168895	0.00493851	0.00215616	0.328235	0.122145	0.0413237	0.671067	2.67804	2.87096	2.7909	2.57914	2.79962	4.24474	4.22741	4.02774	3.88347	-0.529957	-0.456879	-0.491747	-0.587198	-0.460064	0.0752082	356.456	375.028	366.049	342.551	374.199	542.745	537.299	512.551	495.525	358	373	383	348	398	549	523	486	470
Ciart	NA	NA	NA	NA	11754	2.42793	0.54298	-0.935831	-0.625859	0.0308363	0.000581332	0.0187534	0.330506	0.016423	0.1526	3.27817	4.38833	1.48262	1.25936	1.58847	1.84971	2.22289	3.35386	2.58638	0.330878	0.722828	-0.825993	-1.04068	-0.700665	-0.546464	195.154	256.386	86.9719	74.8081	94.9559	105.78	126.369	190.881	147.608	196	255	91	76	101	107	123	181	140
Cic	NM_027882	71722	chr7	capicua homolog (Drosophila)	1340	27.6384	0.145863	-0.0217058	0.285291	0.155118	0.833127	0.00526871	0.670109	0.959838	0.0642044	30.7611	24.9987	24.4124	25.2308	30.5048	31.5133	28.4516	25.2343	24.6939	0.299793	-0.0264943	-0.0548784	0.0108029	0.293807	0.276701	8006.32	6385.53	6261.11	6552.79	7973.17	7879.18	7071.17	6279.22	6161.31	8041	6351	6551	6657	8480	7970	6883	5954	5844
Cirbp	NM_007705	12696	chr10	cold inducible RNA binding protein	4162	44.4693	0.276884	0.475787	0.232445	0.0397085	0.000383122	0.0844194	0.375016	0.012108	0.357412	41.3881	48.3576	49.7628	53.06	50.692	36.6723	35.6284	40.1933	39.1701	0.174689	0.372053	0.419208	0.529842	0.473193	-0.057674	2218.39	2543.76	2628.31	2837.87	2728.56	1888.23	1823.53	2059.68	2012.65	2228	2530	2750	2883	2902	1910	1775	1953	1909
Cish	NM_009895	12700	chr9	cytokine inducible SH2-containing protein	8665	6.87356	0.138805	0.659545	1.35929	0.379058	1.92239e-05	3.26169e-19	0.850546	0.00120898	1.20059e-16	4.76139	4.79913	7.21491	6.49301	12.5283	9.87603	4.81818	4.49753	4.17399	0.146452	0.130801	0.723734	0.58997	1.54623	1.13942	439.098	434.349	655.642	597.496	1160.25	874.913	424.292	396.542	369.011	441	432	686	607	1234	885	413	376	350
Ckap5	NM_029437	75786	chr2	cytoskeleton associated protein 5	636	43.6945	0.342192	0.0594894	-0.11137	0.000150689	0.512545	0.222269	0.0116412	0.821185	0.574151	52.058	52.2591	41.0737	44.5782	39.9456	36.7987	39.109	43.7335	44.9911	0.352864	0.33135	-0.0102409	0.125989	-0.0231095	-0.205502	14471.3	14257.1	11251.1	12365.4	11151.2	9826.73	10381.3	11623	11989.5	14534	14180	11772	12562	11860	9940	10105	11021	11372
Ckm	NM_007710	12715	chr7	creatine kinase, muscle	12035	1.99305	-4.19329	-3.3711	-1.04277	6.61237e-05	0.000733518	0.23706	0.00607648	0.0195319	0.587951	0.131912	0.271455	0.337306	0.375736	0.294597	3.40853	2.17366	8.95118	0.418899	-4.63743	-3.70685	-3.40483	-3.23849	-3.56638	-0.166952	7.96422	16.0861	20.065	22.6393	17.8334	197.728	125.346	516.704	24.2767	8	16	21	23	19	200	122	490	23
Cldn12	NM_022890	64945	chr5	claudin 12	6395	7.84239	-0.150016	0.463426	0.341612	0.246554	0.000251735	0.00715916	0.762219	0.00894172	0.0799258	6.14875	6.26722	9.04374	9.92862	9.61032	7.95231	6.42915	7.35899	7.61315	-0.150247	-0.149791	0.384679	0.537369	0.49958	0.16259	954.864	955.166	1383.92	1538.53	1498.73	1186.32	953.374	1092.59	1133.37	959	950	1448	1563	1594	1200	928	1036	1075
Cldn19	NM_153105	242653	chr4	claudin 19	5803	7.58607	-0.502759	-0.834879	-0.510418	0.0235357	0.000203934	0.0214995	0.288469	0.00781328	0.166398	6.96762	7.53187	7.87647	3.65075	6.13754	8.45404	9.87962	10.1906	11.8332	-0.545716	-0.460518	-0.390168	-1.48027	-0.722506	-0.324851	1259.54	1336.23	1403.05	658.522	1114.16	1468.08	1705.39	1761.22	2050.61	1265	1329	1468	669	1185	1485	1660	1670	1945
Clec2d	NM_053109	93694	chr6	C-type lectin domain family 2, member d	10817	5.0871	-0.953845	-0.111305	0.196778	0.000775998	0.682715	0.465035	0.0370919	0.903462	0.772368	1.88346	3.77701	5.39182	4.72221	6.07229	6.57511	4.63099	7.64393	4.71273	-1.51428	-0.544707	-0.0275932	-0.200125	0.170494	0.221106	97.576	192.038	275.254	244.116	315.912	327.227	229.103	378.598	234.065	98	191	288	248	336	331	223	359	222
Clgn	NM_009904	12745	chr8	calmegin	1929	54.323	0.23943	0.256902	0.146578	0.0123385	0.00721227	0.126288	0.20839	0.0955188	0.440249	54.622	59.2581	52.8691	62.1939	54.2619	53.3545	49.0162	49.0084	51.7804	0.193459	0.283893	0.125182	0.377604	0.189996	0.101654	5310	5653.57	5064.51	6033.06	5297.27	4982.57	4550.08	4554.91	4825.52	5333	5623	5299	6129	5634	5040	4429	4319	4577
Clic1	NM_033444	114584	chr17	chloride intracellular channel 1	2063	100.446	-0.0992392	-0.0450284	0.279815	0.294711	0.633768	0.00281828	0.800221	0.882171	0.0413448	91.1937	89.6888	92.5201	95.1165	112.254	125.279	106.499	91.0173	103.53	-0.0738839	-0.124958	-0.0742811	-0.0162475	0.231899	0.326232	4510.46	4353.54	4509.22	4694.35	5575.57	5952.39	5029.85	4303.92	4908.8	4530	4330	4718	4769	5930	6021	4896	4081	4656
Clic4	NM_013885	29876	chr4	chloride intracellular channel 4 (mitochondrial)	1889	31.3822	-0.147677	0.451655	0.644389	0.206266	8.71459e-05	1.95279e-08	0.729102	0.00405439	1.81031e-06	21.6325	24.6506	35.6244	34.3952	45.105	35.4432	28.7779	25.429	25.4036	-0.230509	-0.0692046	0.467777	0.435243	0.835457	0.423709	3751.75	4195.69	6088.12	5952.34	7855.64	5904.93	4765.82	4216.38	4223.52	3768	4173	6370	6047	8355	5973	4639	3998	4006
Clip1	NM_019765	56430	chr5	CAP-GLY domain containing linker protein 1	3863	10.3408	0.34432	0.158821	0.275289	0.00369296	0.182455	0.0204248	0.0993923	0.559411	0.161578	11.2233	11.4948	10.5383	9.42417	12.3231	9.4459	9.14146	9.13527	9.52011	0.34048	0.347886	0.228444	0.0854072	0.481389	0.0339167	2814.81	2829.3	2604.41	2358.49	3103.71	2275.77	2189.26	2190.45	2288.88	2827	2814	2725	2396	3301	2302	2131	2077	2171
Clk1	NR_027854	12747	chr1	CDC-like kinase 1	7167	12.4947	-1.2122	-0.229739	-0.277724	6.80827e-11	0.196139	0.118757	6.0861e-08	0.575717	0.425492	6.35959	7.70315	16.9643	10.8069	12.8308	14.2834	13.9754	17.0344	19.562	-1.3407	-1.09175	0.0516828	-0.580119	-0.323572	-0.232954	471.955	561.034	1240.57	800.27	956.21	1018.26	990.36	1208.6	1391.67	474	558	1298	813	1017	1030	964	1146	1320
Clk3	NM_007713	102414	chr9	CDC-like kinase 3	5419	15.4752	0.0206302	0.318396	0.306804	0.863016	0.0071283	0.00953208	0.982172	0.095006	0.0996147	14.0235	13.4858	17.9345	15.8679	18.3594	15.4033	15.264	13.4634	13.4127	0.0618002	-0.0216264	0.395269	0.236844	0.456324	0.139195	1492.53	1408.62	1880.91	1685.2	1962.27	1574.85	1551.28	1369.96	1368.48	1499	1401	1968	1712	2087	1593	1510	1299	1298
Cln5	NM_001033242	211286	chr14	ceroid-lipofuscinosis, neuronal 5	4872	18.2436	0.0212582	0.13391	0.298222	0.825768	0.163323	0.00179222	0.976817	0.533677	0.0296296	16.81	16.9823	18.2604	18.2415	19.241	22.1148	17.1438	17.1551	17.4302	0.0273978	0.0150372	0.125512	0.142123	0.228229	0.364968	1755.4	1740.41	1879	1900.77	2017.73	2218.43	1709.49	1712.71	1744.86	1763	1731	1966	1931	2146	2244	1664	1624	1655
Clpx	NM_011802	270166	chr9	caseinolytic peptidase X (E.coli)	5302	13.9092	0.230893	0.326223	0.285487	0.0226097	0.00121644	0.00468927	0.282961	0.0279848	0.0589219	13.2411	14.713	15.136	14.6872	14.6574	14.6015	11.5949	12.6427	12.7498	0.166887	0.291804	0.33852	0.313229	0.319478	0.249982	1607.04	1752.48	1810.19	1778.71	1786.44	1702.38	1343.76	1466.98	1483.4	1614	1743	1894	1807	1900	1722	1308	1391	1407
Clrn1	NM_153386	229320	chr3	clarin 1	7007	8.43658	0.236715	-0.276633	-0.396606	0.0617481	0.0322509	0.00226244	0.463574	0.238265	0.035393	10.8511	9.80831	6.83675	7.62689	5.99127	7.48262	9.45076	9.44494	8.35829	0.32031	0.147608	-0.366718	-0.191011	-0.529655	-0.273306	1319.29	1170.33	819.071	925.285	731.492	873.926	1097.2	1097.86	974.177	1325	1164	857	940	778	884	1068	1041	924
Cltc	NM_001003908	67300	chr11	clathrin, heavy polypeptide (Hc)	72	185.218	0.286653	0.164189	0.0958639	0.00140455	0.0680018	0.287326	0.0545897	0.356297	0.633488	208.753	199.216	178.813	195.586	190.284	169.781	160.732	178.582	180.375	0.333136	0.238599	0.0885677	0.236036	0.205576	-0.0229259	54733.9	51262.2	46199	51171.2	50102.2	42763.1	40241.9	44765.5	45336.8	54971	50985	48338	51985	53287	43256	39171	42447	43002
Cluh	NA	NA	NA	NA	2041	21.9737	0.294523	0.0427025	0.0850944	0.00244492	0.662388	0.383667	0.0779585	0.895825	0.716977	26.72	22.5083	20.4211	20.9153	21.826	21.1272	21.5219	20.7499	20.1388	0.425193	0.150702	0.0161838	0.0687838	0.139453	0.0285015	6156.33	5089.52	4636.34	4808.53	5049.99	4676.1	4735	4570.73	4448.08	6183	5062	4851	4885	5371	4730	4609	4334	4219
Cmpk2	NM_020557	22169	chr12	cytidine monophosphate (UMP-CMP) kinase 2, mitochondrial	5058	13.0929	0.0197952	-0.00836955	-0.325508	0.848616	0.935689	0.00194342	0.982172	0.98281	0.0315869	12.6354	14.9882	13.9262	13.1201	11.1728	10.723	13.985	14.1929	14.1181	-0.093923	0.125243	0.0251108	-0.042758	-0.265211	-0.388443	1719.55	2001.83	1867.53	1781.67	1526.93	1401.84	1817.36	1846.65	1841.86	1727	1991	1954	1810	1624	1418	1769	1751	1747
Cmtm5	NM_029390	67272	chr14	CKLF-like MARVEL transmembrane domain containing 5	7133	25.6611	-0.109633	-0.991363	-0.188936	0.557631	3.09014e-07	0.313317	0.920409	4.44519e-05	0.659129	28.942	27.4324	15.169	15.402	18.5625	35.6582	34.672	29.4502	30.4045	-0.0583176	-0.16258	-1.01037	-0.970325	-0.692323	0.184602	1099.24	1022.53	567.711	583.716	707.977	1301.01	1257.46	1069.39	1107.02	1104	1017	594	593	753	1316	1224	1014	1050
Cnn2	NM_007725	12798	chr10	calponin 2	10309	4.26335	-0.368598	-0.998122	-0.29535	0.111762	2.96845e-05	0.200717	0.59167	0.00171991	0.549819	3.75772	4.48611	2.93347	2.38683	3.05334	5.75142	5.61656	6.12133	4.78694	-0.486012	-0.258216	-0.862981	-1.141	-0.778368	0.0684999	285.762	334.811	219.822	181.117	233.16	420.159	407.855	445.05	348.982	287	333	230	184	248	425	397	422	331
Cnn3	NM_028044	71994	chr3	calponin 3, acidic	656	140.65	-0.000931895	0.413637	0.28111	0.990983	4.08576e-07	0.000596434	0.998957	5.60575e-05	0.0123749	115.506	130.809	165.541	162.296	150.325	151.543	127.716	121.462	133.502	-0.0791314	0.0732623	0.418816	0.408374	0.30703	0.254644	9873.23	10973.3	13943.4	13842.9	12903.7	12443.6	10424.4	9926.1	10939.4	9916	10914	14589	14063	13724	12587	10147	9412	10376
Cnot6	NM_212484	104625	chr11	CCR4-NOT transcription complex, subunit 6	4438	8.60112	-0.626578	0.0172422	-0.0432576	1.01194e-06	0.890357	0.729923	0.000294523	0.970953	0.904543	5.31752	7.01001	9.8676	9.35377	9.00043	9.61498	8.53718	10.1075	10.8829	-0.823881	-0.452549	0.046331	-0.0126773	-0.0590192	-0.0277698	1299.37	1681.09	2375.99	2280.73	2208.6	2256.98	1992.01	2361.3	2549.29	1305	1672	2486	2317	2349	2283	1939	2239	2418
Cnot6l	NM_178854	231464	chr5	CCR4-NOT transcription complex, subunit 6-like	6153	3.50382	-0.548119	0.0552628	-0.199281	7.25568e-05	0.681904	0.142915	0.00653272	0.903233	0.469068	2.27489	3.0471	4.01801	4.0488	3.3048	3.52551	3.45604	4.35542	4.26113	-0.758235	-0.364087	0.0404811	0.0695952	-0.213938	-0.184717	831.398	1092.91	1447	1476.52	1212.89	1237.73	1206.1	1521.82	1492.88	835	1087	1514	1500	1290	1252	1174	1443	1416
Cnot8	NM_026949	69125	chr11	CCR4-NOT transcription complex, subunit 8	4715	22.3461	-0.12869	-0.186848	-0.300933	0.186797	0.055634	0.00215334	0.708199	0.320375	0.0339155	21.9561	23.2636	22.2813	21.1054	19.7188	20.7617	25.4586	24.223	27.1011	-0.157079	-0.100734	-0.157097	-0.217168	-0.305965	-0.295644	1906.74	1982.72	1906.72	1828.91	1719.68	1732.03	2111.18	2011.17	2256.2	1915	1972	1995	1858	1829	1752	2055	1907	2140
Cnp	NM_009923	12799	chr11	2',3'-cyclic nucleotide 3' phosphodiesterase	2011	50.4509	-0.0526633	-0.319611	-0.0146515	0.645979	0.00567878	0.898176	0.942275	0.0821618	0.964491	50.6141	51.9443	46.8491	38.3449	46.7007	59.7664	59.6178	49.7698	55.8509	-0.0578104	-0.0474644	-0.190529	-0.461334	-0.167804	0.124003	5039.17	5075.45	4596.2	3809.42	4669.18	5716.11	5667.83	4737.37	5330.52	5061	5048	4809	3870	4966	5782	5517	4492	5056
Cnpy4	NM_178612	66455	chr5	canopy 4 homolog (zebrafish)	8710	7.80381	-0.347394	-0.568317	-0.108989	0.0367904	0.000715474	0.507585	0.361406	0.0191348	0.802783	6.61573	7.52149	6.53383	5.58106	6.78765	10.1011	9.71065	9.57901	8.6387	-0.427827	-0.270082	-0.466951	-0.675768	-0.384852	0.123857	502.821	561.034	489.342	423.267	518.055	737.5	704.756	696.054	629.422	505	558	512	430	551	746	686	660	597
Cnst	NM_146105	226744	chr1	consortin, connexin sorting protein	571	68.1663	0.0747162	0.175821	0.380728	0.323108	0.0197269	3.95404e-07	0.82356	0.180338	2.6029e-05	63.9689	62.6553	69.4992	66.2251	76.1061	81.9021	62.442	62.532	61.84	0.10293	0.0459208	0.201319	0.14982	0.359633	0.401489	12407.3	11926.5	13283	12817.2	14823.7	15260.1	11564.7	11595.6	11498.2	12461	11862	13898	13021	15766	15436	11257	10995	10906
Cntfr	NM_016673	12804	chr4	ciliary neurotrophic factor receptor	3821	30.4783	0.017884	-0.38328	-0.243765	0.859995	0.000193414	0.017134	0.982172	0.00753682	0.144544	34.846	32.2974	25.97	24.8514	26.1015	30.5003	37.0718	32.1881	33.8072	0.0846045	-0.0520028	-0.360599	-0.40598	-0.326021	-0.165425	2971.13	2702.62	2181.97	2114.37	2234.92	2498.2	3018.32	2623.9	2763.31	2984	2688	2283	2148	2377	2527	2938	2488	2621
Cntln	NM_177385	338349	chr4	centlein, centrosomal protein	7501	8.40638	0.0100961	-0.217839	-0.388085	0.94003	0.107512	0.00443521	0.99025	0.447163	0.057073	8.44328	10.0415	7.63527	8.11771	6.2414	7.93256	8.6977	10.1416	9.65499	-0.105669	0.11712	-0.27183	-0.165444	-0.53497	-0.253457	875.208	1021.52	779.886	839.646	649.691	789.895	860.914	1005.06	959.413	879	1016	816	853	691	799	838	953	910
Cntn4	NM_173004	269784	chr6	contactin 4	6708	8.78712	0.140712	-0.0410298	-0.495449	0.261551	0.744842	0.00011658	0.771811	0.929181	0.00338514	9.95815	10.4607	8.72412	9.25433	7.26047	5.95011	8.78482	9.90427	10.0783	0.118383	0.162297	-0.0935347	0.00961225	-0.330921	-0.681664	1236.64	1274.89	1067.57	1146.76	905.444	709.816	1041.73	1175.91	1199.79	1242	1268	1117	1165	963	718	1014	1115	1138
Cntn5	NM_001170787	244682	chr9	contactin 5	11673	0.964728	-0.189706	-0.195167	-0.734965	0.452813	0.439359	0.00475609	0.879143	0.781259	0.0594117	0.938193	1.09848	0.838277	1.18593	0.766614	0.635319	1.25146	1.00356	1.35075	-0.291607	-0.0924159	-0.474049	0.041294	-0.574734	-0.906661	144.374	165.897	127.105	182.105	118.47	93.9155	183.895	147.658	199.261	145	165	133	185	126	95	179	140	189
Coil	NM_016706	12812	chr11	coilin	8165	6.61241	0.279171	0.295033	0.870906	0.0748613	0.0593576	1.5296e-08	0.504518	0.331317	1.4613e-06	6.1753	5.87507	6.8001	5.3822	7.7677	10.6193	5.57985	4.69979	5.15032	0.327435	0.228604	0.445089	0.126317	0.664039	1.05076	687.024	641.469	745.484	597.496	867.823	1134.92	592.775	499.899	549.293	690	638	780	607	923	1148	577	474	521
Col14a1	NM_181277	12818	chr15	collagen, type XIV, alpha 1	9095	1.85399	0.269475	-0.524848	-0.440287	0.0852752	0.00121171	0.00637246	0.533402	0.0279273	0.0732336	2.38095	2.56896	1.30771	1.54154	1.52435	1.52591	2.15043	1.83203	2.39409	0.227309	0.309755	-0.656584	-0.401765	-0.408748	-0.47114	655.162	693.752	354.576	423.269	421.22	403.349	565.038	481.972	631.522	658	690	371	430	448	408	550	457	599
Col16a1	NM_028266	107581	chr4	collagen, type XVI, alpha 1	7874	3.57295	0.0881914	0.0170247	0.651587	0.610779	0.921865	0.000131801	0.933184	0.977972	0.00369841	3.49575	2.97894	3.79382	2.37554	4.28596	5.39654	3.10414	3.1529	3.21276	0.211022	-0.0464947	0.30773	-0.34857	0.510758	0.778902	776.636	649.513	830.55	526.621	956.207	1151.72	658.527	669.689	684.242	780	646	869	535	1017	1165	641	635	649
Col18a1	NM_009929	12822	chr10	collagen, type XVIII, alpha 1	8693	2.57922	-0.0716698	0.184089	0.599804	0.632089	0.212809	3.74961e-05	0.940056	0.595502	0.00134075	2.03553	2.12427	2.60476	2.3576	3.31747	3.36364	2.58918	2.24133	1.95987	-0.0885812	-0.0541672	0.245321	0.119819	0.621027	0.576998	488.882	500.708	616.456	565.013	800.133	776.053	593.801	514.66	451.249	491	498	645	574	851	785	578	488	428
Col23a1	NM_153393	237759	chr11	collagen, type XXIII, alpha 1	6953	4.18599	-0.0630281	-0.20928	-0.432677	0.602879	0.0857136	0.000437227	0.932554	0.402064	0.00977124	4.43986	4.57675	3.98392	4.15394	3.27257	3.77587	4.88642	4.39863	5.34535	-0.07136	-0.0546419	-0.248743	-0.170412	-0.504911	-0.36271	1073.35	1085.87	949.054	1002.06	794.489	876.892	1128.02	1016.66	1238.8	1078	1080	993	1018	845	887	1098	964	1175
Col28a1	NM_001037865	213945	chr6	collagen, type XXVIII, alpha 1	3351	16.2369	-0.116797	-0.558158	-0.807537	0.226853	1.32978e-08	4.25723e-16	0.743525	3.26318e-06	1.36613e-13	19.0351	18.6606	14.2655	13.4761	11.6753	11.881	21.4263	19.4752	22.6033	-0.0891738	-0.144903	-0.52639	-0.590368	-0.788039	-0.826852	3436.12	3305.88	2537.51	2427.4	2116.46	2060.25	3693.28	3361.09	3911.44	3451	3288	2655	2466	2251	2084	3595	3187	3710
Col4a1	NM_009931	12826	chr8	collagen, type IV, alpha 1	3376	11.0529	0.159769	1.20086	0.874485	0.387867	4.70956e-11	1.72493e-06	0.854764	2.18297e-08	9.99422e-05	7.67149	8.11839	14.482	17.9511	16.4507	9.51855	7.89674	6.33423	7.72168	0.132178	0.186762	1.02732	1.35518	1.23847	0.385357	2165.62	2249.16	4028.48	5056.59	4663.56	2581.24	2128.65	1709.55	2089.62	2175	2237	4215	5137	4960	2611	2072	1621	1982
Col4a2	NM_009932	12827	chr8	collagen, type IV, alpha 2	5628	5.74291	0.319119	1.03498	0.836083	0.0387395	1.06178e-11	4.29744e-08	0.373063	5.77747e-09	3.68373e-06	4.58577	4.79687	7.21524	8.17296	8.08486	5.38899	4.15473	3.54386	3.98241	0.299899	0.337719	0.932142	1.12998	1.12354	0.474668	1257.55	1290.98	1949.72	2236.43	2226.48	1419.63	1087.95	929.13	1046.92	1263	1284	2040	2272	2368	1436	1059	881	993
Col5a3	NM_016919	53867	chr9	collagen, type V, alpha 3	6624	4.46428	0.527381	0.618581	0.714413	0.00101041	0.000110542	7.66161e-06	0.0439071	0.00487126	0.00035912	4.62344	4.56389	5.50088	4.28439	6.13203	4.37453	3.35123	2.88389	3.66711	0.549602	0.503859	0.778894	0.436707	0.962785	0.411931	1200.8	1163.29	1407.82	1110.34	1599.34	1091.42	831.119	716.098	913.02	1206	1157	1473	1128	1701	1104	809	679	866
Commd3	NM_147778	12238	chr2	COMM domain containing 3	4612	54.1286	-0.158403	-0.0613808	-0.286392	0.0962192	0.517204	0.00274799	0.558268	0.822676	0.0406996	50.9276	53.0274	58.4582	52.6341	46.569	49.4078	61.1528	60.8518	58.2123	-0.173994	-0.142798	0.00364676	-0.129581	-0.296926	-0.275598	1914.71	1956.58	2165.73	1974.6	1758.23	1784.43	2195.42	2187.29	2098.05	1923	1946	2266	2006	1870	1805	2137	2074	1990
Copb1	NM_033370	70349	chr7	coatomer protein complex, subunit beta 1	2991	24.6297	0.302817	0.316679	0.197102	0.00512835	0.00340028	0.0691034	0.125173	0.0573652	0.327835	24.8662	27.4973	24.4763	28.297	26.2483	22.7186	21.2258	21.7083	22.9805	0.242522	0.360515	0.198502	0.425821	0.326614	0.0543181	3517.76	3817.64	3412.02	3994.48	3728.96	3087.41	2867.3	2936.07	3116.5	3533	3797	3570	4058	3966	3123	2791	2784	2956
Copz2	NM_019877	56358	chr11	coatomer protein complex, subunit zeta 2	10447	7.60366	-0.191469	-0.529684	-0.407339	0.305697	0.00532747	0.030927	0.808977	0.078584	0.210161	7.28337	8.47602	6.87468	5.57371	5.80966	7.91732	9.82383	9.07074	9.04357	-0.289513	-0.0984272	-0.393681	-0.677066	-0.608412	-0.227262	288.749	329.784	268.565	220.491	231.286	301.525	371.898	343.812	343.706	290	328	281	224	246	305	362	326	326
Cotl1	NM_028071	72042	chr8	coactosin-like 1 (Dictyostelium)	5128	25.2855	-0.0930283	-0.467881	-0.037408	0.480979	0.000470181	0.776362	0.889381	0.0144298	0.921282	26.1648	24.4608	22.0208	17.0232	23.9209	29.2798	31.0098	28.4037	24.5135	-0.0321861	-0.156345	-0.30201	-0.655001	-0.155395	0.0720916	1830.07	1679.08	1517.73	1188.1	1680.19	1967.32	2071.11	1899.38	1643.66	1838	1670	1588	1207	1787	1990	2016	1801	1559
Cox7b	NM_025379	66142	chrX	cytochrome c oxidase subunit VIIb	768	250.507	0.391435	0.505777	-0.22118	0.00556483	0.000332116	0.122377	0.131403	0.0109743	0.431181	267.559	306.452	271.533	348.379	159.08	220.628	188.439	241.987	248.909	0.304565	0.473275	0.304604	0.682223	-0.43938	-0.0315932	11429.5	12847.5	11429.8	14849.8	6824.2	9053.64	7686.55	9882.86	10192.9	11479	12778	11959	15086	7258	9158	7482	9371	9668
Cpd	NM_007754	12874	chr11	carboxypeptidase D	1259	19.3968	0.15432	0.134011	0.307346	0.0752495	0.122474	0.000375064	0.505501	0.469026	0.00872477	19.8265	18.6372	18.9284	18.9737	22.1795	20.9323	16.9881	18.7088	18.0135	0.211248	0.0949434	0.123155	0.144714	0.379104	0.231598	7743.46	7143.63	7284.72	7394.41	8699.03	7853.47	6335.6	6985.81	6744.33	7777	7105	7622	7512	9252	7944	6167	6624	6397
Cpeb4	NM_026252	67579	chr11	cytoplasmic polyadenylation element binding protein 4	1457	20.5758	0.358373	0.441858	0.28535	0.0100174	0.00147182	0.0405644	0.188806	0.0319788	0.246558	21.0479	22.373	22.7578	23.1916	24.7307	16.7018	15.5733	18.2305	18.7965	0.327479	0.388476	0.418921	0.464275	0.566156	-0.0640744	6863.27	7159.72	7312.43	7546	8098.23	5231.69	4849.04	5683.36	5875.59	6893	7121	7651	7666	8613	5292	4720	5389	5573
Cpq	NA	NA	NA	NA	8161	8.21972	-0.241336	-0.206454	-0.437541	0.0804525	0.133715	0.00166913	0.520068	0.49087	0.0282285	7.13982	8.77744	7.51955	8.7503	6.97538	7.02017	9.93156	9.64355	9.62747	-0.382484	-0.11205	-0.329051	-0.0925772	-0.409981	-0.464676	613.343	740.002	636.522	750.072	601.744	579.321	814.681	792.026	792.836	616	736	666	762	640	586	793	751	752
Crabp1	NM_013496	12903	chr9	cellular retinoic acid binding protein I	11933	4.23201	0.284994	-0.928937	-0.0657716	0.334856	0.00320207	0.826283	0.831352	0.0550466	0.938495	5.29037	5.58297	1.75085	2.92309	3.28458	5.36287	5.71642	3.94495	4.19534	0.258315	0.308589	-1.33961	-0.593145	-0.417912	0.220264	155.327	160.87	50.6428	85.64	96.8292	151.258	160.262	110.746	118.089	156	160	53	87	103	153	156	105	112
Crabp2	NM_007759	12904	chr3	cellular retinoic acid binding protein II	12157	2.30248	-0.148122	-0.912438	0.172449	0.635137	0.00531676	0.5735	0.940123	0.078584	0.836911	1.68508	2.96083	1.48995	1.23285	3.16907	2.65269	2.18494	3.04442	2.74895	-0.586958	0.189915	-0.782498	-1.03284	0.320028	0.00227527	64.7185	111.603	56.3884	47.2462	122.23	97.8699	80.1383	111.788	101.216	65	111	59	48	130	99	78	106	96
Cramp1l	NM_020608	57354	chr17	Crm, cramped-like (Drosophila)	6094	4.16031	0.0139353	0.201685	0.334678	0.898211	0.0618553	0.00184534	0.983169	0.338253	0.0303076	3.86951	3.68451	4.33764	4.26103	4.80871	4.70505	3.61784	3.99816	4.01018	0.0617957	-0.0358817	0.205211	0.197629	0.381142	0.285736	1241.62	1160.28	1371.5	1364.3	1549.5	1450.28	1108.5	1226.53	1233.53	1247	1154	1435	1386	1648	1467	1079	1163	1170
Crebrf	NA	NA	NA	NA	2396	13.7404	-0.0525238	0.701497	0.195064	0.789316	0.00029536	0.318127	0.966838	0.0101272	0.66345	10.1336	12.2337	17.8701	19.7725	17.4064	9.16339	10.5843	12.7597	12.6592	-0.179986	0.0645854	0.617006	0.781038	0.606387	-0.383055	3223.04	3818.65	5600.69	6275.21	5559.61	2799.72	3214.55	3879.95	3859.78	3237	3798	5860	6375	5913	2832	3129	3679	3661
Crem	NM_013498	12916	chr18	cAMP responsive element modulator	9735	4.82058	-0.269563	0.0364468	0.690778	0.128374	0.834362	4.83764e-05	0.626046	0.959975	0.00165871	3.54176	3.54955	4.63746	4.12419	5.75256	8.22466	4.22459	4.50985	4.54715	-0.257113	-0.28094	0.109467	-0.0412399	0.44686	0.897843	306.671	301.632	395.678	356.331	500.192	684.115	349.298	373.34	377.441	308	300	414	362	532	692	340	354	358
Crispld1	NM_031402	83691	chr1	cysteine-rich secretory protein LCCL domain containing 1	11140	1.25067	-0.208669	-1.14025	-0.569174	0.483187	0.000245602	0.0594518	0.890321	0.0089026	0.301191	1.18232	1.67796	0.680819	0.813617	0.629823	1.63739	1.69289	1.69056	1.7434	-0.465455	0.010551	-1.27764	-1.00452	-1.36211	-0.0553695	202.124	281.522	114.683	138.793	108.104	268.903	276.357	276.316	285.718	203	280	120	141	115	272	269	262	271
Crispld2	NM_030209	78892	chr8	cysteine-rich secretory protein LCCL domain containing 2	8434	3.60979	-0.311915	-0.223307	-0.636119	0.171046	0.32532	0.00582677	0.686647	0.695367	0.0685901	3.02471	3.96835	4.02532	3.39777	1.77633	3.89914	4.25851	4.52822	4.68232	-0.504989	-0.140927	-0.11455	-0.340606	-1.26503	-0.197092	535.679	689.73	702.475	600.449	315.898	663.356	720.168	766.714	794.942	538	686	735	610	336	671	701	727	754
Crlf1	NM_018827	12931	chr8	cytokine receptor-like factor 1	12219	1.21621	-0.33219	0.00456744	1.18686	0.365959	0.989856	0.000537561	0.845866	0.997668	0.011422	0.80797	0.641736	1.15987	0.674098	1.79943	2.4174	1.27127	0.957945	0.610622	-0.161128	-0.513449	0.331991	-0.420693	0.986123	1.34562	56.7542	44.2402	80.2882	47.2444	126.921	163.12	85.264	64.3361	41.1354	57	44	84	48	135	165	83	61	39
Crmp1	NM_007765	12933	chr5	collapsin response mediator protein 1	1854	41.0905	0.220386	0.0974418	0.431633	0.0146702	0.281997	1.54684e-06	0.225605	0.662832	9.00407e-05	42.1448	40.7566	36.2784	39.7732	45.7602	51.1606	37.7716	35.0788	37.7144	0.257554	0.182168	0.0201267	0.170899	0.382353	0.479249	5580.83	5296.64	4733.82	5255.42	6085.18	6507.98	4776.1	4441.02	4787.56	5605	5268	4953	5339	6472	6583	4649	4211	4541
Cry1	NM_007771	12952	chr10	cryptochrome 1 (photolyase-like)	8397	5.22944	-0.174124	0.710127	0.442336	0.259003	1.88132e-06	0.00322301	0.771399	0.000199531	0.046151	3.46575	4.11522	6.35269	7.61079	6.31422	5.37319	4.11265	4.49098	4.67406	-0.288217	-0.0679486	0.563305	0.841798	0.581842	0.285384	446.067	519.811	805.69	977.456	816.121	664.34	505.454	552.626	576.702	448	517	843	993	868	672	492	524	547
Cry2	NM_009963	12953	chr2	cryptochrome 2 (photolyase-like)	1821	32.5517	0.141995	0.405806	0.459875	0.323699	0.00456678	0.0012948	0.82386	0.0709889	0.0232821	30.942	28.2309	33.7597	37.2305	44.8172	29.2446	28.0401	28.1488	27.1627	0.219434	0.0600947	0.32392	0.483194	0.759916	0.0801169	5283.12	4730.58	5680.01	6343.13	7684.53	4796.71	4571.66	4594.99	4445.97	5306	4705	5943	6444	8173	4852	4450	4357	4217
Csf1	NM_007778	12977	chr3	colony stimulating factor 1 (macrophage)	7027	5.86681	-0.0445558	0.113781	0.940981	0.735504	0.384649	1.74794e-13	0.958538	0.741841	4.12746e-11	4.15125	4.85769	5.49696	4.54459	8.06454	9.95567	5.00475	4.85903	4.5606	-0.147534	0.0518638	0.235872	-0.0202079	0.815639	1.05539	739.795	849.595	965.306	808.146	1443.25	1704.35	851.665	827.882	779.131	743	845	1010	821	1535	1724	829	785	739
Csf2rb	NM_007780	12983	chr15	colony stimulating factor 2 receptor, beta, low-affinity (granulocyte-macrophage)	11139	1.14056	-0.619762	0.700491	1.01648	0.0786488	0.037049	0.00234588	0.516416	0.255888	0.036335	0.455376	0.634806	1.37847	1.33893	2.38506	0.997005	0.714264	1.22056	0.665243	-0.857203	-0.409166	0.709215	0.685446	1.52529	0.207265	92.598	126.685	276.208	271.678	487.056	194.751	138.697	237.276	129.692	93	126	289	276	518	197	135	225	123
Csgalnact2	NM_030165	78752	chr6	chondroitin sulfate N-acetylgalactosaminyltransferase 2	8000	4.85891	-0.0371596	0.477681	0.186931	0.820323	0.00295007	0.24877	0.974973	0.0517814	0.59934	3.67728	4.66889	5.96603	5.93526	5.50142	4.2882	3.84946	4.98478	4.45597	-0.204327	0.112544	0.471634	0.482285	0.382087	-0.0408124	574.511	715.871	918.471	925.284	863.135	643.579	574.287	744.562	667.374	577	712	961	940	918	651	559	706	633
Csnk1d	NM_139059	104318	chr11	casein kinase 1, delta	664	75.7922	0.093661	0.168477	0.291161	0.284891	0.053929	0.000837817	0.792928	0.315186	0.0164863	75.2748	69.7798	74.5721	78.0963	88.5983	78.9801	70.5371	70.4987	70.2316	0.160246	0.0238227	0.125488	0.210217	0.40142	0.17162	11840.7	10772.3	11558.8	12258.1	13995.4	11934.4	10594.9	10602.1	10590.4	11892	10714	12094	12453	14885	12072	10313	10053	10045
Cspg5	NM_013884	29873	chr9	chondroitin sulfate proteoglycan 5	10056	2.22429	-0.0611003	-0.693245	-0.348465	0.726263	0.000120259	0.0486721	0.954901	0.00520774	0.271436	2.4893	2.42486	1.58527	1.58247	1.73999	2.33616	2.88515	2.75115	2.33014	-0.0288472	-0.0935977	-0.699035	-0.683513	-0.537993	-0.178013	411.218	393.126	258.048	260.85	288.641	370.727	455.111	434.507	369.013	413	391	270	265	307	375	443	412	350
Csrnp1	NM_153287	215418	chr9	cysteine-serine-rich nuclear protein 1	9150	4.44312	2.10739	0.874553	2.00091	4.26478e-17	0.000546878	1.36965e-15	6.67171e-14	0.0158064	4.08122e-13	7.24984	6.46272	3.13788	2.69553	8.76831	3.97194	1.64874	1.60996	1.6854	2.19548	2.00283	0.968257	0.767711	2.47565	1.27087	894.127	782.231	381.343	331.723	1085.98	470.572	194.169	189.838	199.266	898	778	399	337	1155	476	189	180	189
Ctdp1	NM_026295	67655	chr18	CTD (carboxy-terminal domain, RNA polymerase II, polypeptide A) phosphatase, subunit 1	8525	4.11309	0.173561	0.38034	0.482222	0.301745	0.0225274	0.00370395	0.806934	0.195135	0.0504406	3.86227	3.76551	4.3359	4.46009	5.66802	3.81527	3.44127	3.55641	3.51078	0.204671	0.141099	0.350089	0.408869	0.763395	0.12918	607.369	581.143	671.887	699.869	895.107	576.354	516.754	534.697	529.261	610	578	703	711	952	583	503	507	502
Ctdsp2	NM_146012	52468	chr10	CTD (carboxy-terminal domain, RNA polymerase II, polypeptide A) small phosphatase 2	3231	15.4643	-0.158616	0.302987	0.118831	0.164208	0.00706598	0.292978	0.679568	0.0946097	0.638896	12.8826	13.2901	17.8271	18.1745	17.832	14.0652	14.4219	15.221	15.7364	-0.167542	-0.149703	0.279729	0.32568	0.307432	-0.0988102	2651.51	2684.52	3615.6	3732.64	3685.71	2780.94	2834.43	2995.13	3104.9	2663	2670	3783	3792	3920	2813	2759	2840	2945
Ctdspl	NM_133710	69274	chr9	CTD (carboxy-terminal domain, RNA polymerase II, polypeptide A) small phosphatase-like	7721	4.08104	-0.870453	0.129025	-0.0779217	7.52419e-11	0.309445	0.542678	6.27768e-08	0.682301	0.820813	2.29436	2.67203	5.08888	4.82602	4.48089	4.17993	4.40795	4.69826	4.99053	-0.968677	-0.776308	0.157621	0.0992882	0.00153562	-0.162603	453.037	517.8	990.153	950.877	888.517	792.859	831.12	886.941	944.651	455	515	1036	966	945	802	809	841	896
Ctdspl2	NM_212450	329506	chr2	CTD (carboxy-terminal domain, RNA polymerase II, polypeptide A) small phosphatase like 2	8486	2.24276	-0.160537	0.541217	0.0267667	0.364168	0.00171706	0.878701	0.844968	0.0353882	0.959051	1.57924	2.10242	2.84058	3.13268	2.41966	1.78619	1.86359	2.2177	2.30286	-0.365653	0.0193444	0.458683	0.617833	0.254898	-0.246203	454.033	593.208	804.735	898.707	698.596	493.311	511.619	609.574	634.687	456	590	842	913	743	499	498	578	602
Ctgf	NM_010217	14219	chr10	connective tissue growth factor	9145	5.16403	-0.498347	0.883728	0.185972	0.0171649	9.43462e-06	0.359654	0.245508	0.000728853	0.70012	2.45752	3.64799	6.44371	9.41191	4.85013	5.02989	4.20881	5.26231	3.90541	-0.792809	-0.251777	0.573131	1.13715	0.191253	0.179762	251.908	366.984	650.855	962.692	499.258	495.29	411.966	515.707	383.773	253	365	681	978	531	501	401	489	364
Ctla2a	NM_007796	13024	chr13	cytotoxic T lymphocyte-associated protein 2 alpha	9397	8.63773	-0.406457	1.39244	1.53795	0.136375	8.82731e-08	3.37167e-09	0.64332	1.51334e-05	3.63762e-07	3.32064	3.77634	11.2874	13.3674	18.9158	8.38167	4.45675	5.59574	4.55584	-0.485977	-0.328312	1.25263	1.51439	2.02391	0.787376	189.18	211.142	633.655	759.915	1082.22	458.708	242.456	304.784	248.821	190	210	663	772	1151	464	236	289	236
Ctnnal1	NM_018761	54366	chr4	catenin (cadherin associated protein), alpha-like 1	5546	9.53651	-0.178158	-0.703879	-0.460326	0.285561	3.47963e-05	0.00626873	0.793471	0.00197048	0.0722404	9.36567	11.642	8.25409	6.31974	6.71819	10.779	11.6105	11.6029	13.672	-0.328493	-0.0418607	-0.531845	-0.89865	-0.801359	-0.183765	1473.62	1797.72	1279.75	992.218	1061.51	1629.22	1744.42	1745.41	2062.2	1480	1788	1339	1008	1129	1648	1698	1655	1956
Ctns	NM_031251	83429	chr11	cystinosis, nephropathic	6721	8.49745	-0.239662	-0.373094	-0.116008	0.0585981	0.00339232	0.356982	0.450956	0.0573652	0.696794	8.15454	7.84008	8.29837	6.28201	8.21465	9.38977	9.95871	9.84145	9.54655	-0.198223	-0.281952	-0.194228	-0.577302	-0.18157	-0.052816	1047.46	988.345	1050.37	805.192	1059.63	1158.64	1221.51	1208.6	1175.55	1052	983	1099	818	1127	1172	1189	1146	1115
Ctsk	NM_007802	13038	chr3	cathepsin K	10682	4.01286	-0.0169225	-0.206626	-0.525264	0.924952	0.25415	0.00443829	0.987583	0.639564	0.057073	4.09745	4.79225	3.66118	4.11794	3.24315	3.04679	4.52299	4.62111	4.81891	-0.119392	0.0788411	-0.302367	-0.115323	-0.449318	-0.602708	276.8	317.718	243.71	277.585	220.012	197.719	291.767	298.463	312.075	278	316	255	282	234	200	284	283	296
Ctsl	NM_009984	13039	chr13	cathepsin L	108	450.363	-0.086572	0.195692	0.361306	0.399499	0.0552558	0.000385296	0.859448	0.318823	0.00890761	383.775	390.271	487.643	452.948	592.574	469.314	426.781	399.601	450.378	-0.0851399	-0.0880012	0.239189	0.150828	0.54766	0.147198	32280.2	32216.2	40417.7	38016.4	50053.3	37920.9	34278.2	32134.3	36315.2	32420	32042	42289	38621	53235	38358	33366	30470	34445
Ctso	NM_177662	229445	chr3	cathepsin O	8193	4.62791	-0.367259	-0.675335	-0.702074	0.0255986	5.10094e-05	2.59888e-05	0.30138	0.00265993	0.00100697	4.13528	5.35338	4.06116	3.58823	3.11337	4.49762	5.7241	6.55017	6.71713	-0.549594	-0.20471	-0.596839	-0.757057	-0.952293	-0.486462	609.36	774.187	589.695	527.608	460.702	636.662	805.438	922.797	948.868	612	770	617	536	490	644	784	875	900
Cttn	NM_007803	13043	chr7	cortactin	1613	44.2994	0.0529389	0.099395	0.280761	0.539782	0.248862	0.00106559	0.916503	0.634449	0.0199341	42.8777	41.6599	41.6269	45.5864	48.9305	50.9618	41.5045	41.2474	43.8665	0.0868227	0.0181875	0.0228924	0.172073	0.283378	0.278032	5897.45	5623.41	5641.78	6256.5	6758.39	6733.38	5451.06	5423.92	5783.87	5923	5593	5903	6356	7188	6811	5306	5143	5486
Cttnbp2	NM_080285	30785	chr6	cortactin binding protein 2	8865	2.22971	-0.0132041	-0.115975	0.417054	0.931853	0.454148	0.00593271	0.989608	0.789396	0.0693395	2.16364	2.0036	2.14596	1.73438	2.80767	2.85839	2.19336	1.93071	2.41159	0.0539699	-0.0837085	0.0209654	-0.267533	0.435343	0.397205	547.628	497.692	535.219	438.032	713.632	694.988	530.109	467.207	585.134	550	495	560	445	759	703	516	443	555
Cttnbp2nl	NM_030249	80281	chr3	CTTNBP2 N-terminal like	4137	11.3991	-0.34117	0.241057	-0.0262843	0.00198607	0.0257547	0.809394	0.0680977	0.210942	0.932827	8.43426	9.72199	13.2039	13.9318	12.1373	10.5848	11.1753	12.0039	12.5282	-0.432692	-0.254876	0.192415	0.287917	0.0982441	-0.163122	1738.47	1966.64	2681.83	2865.43	2512.3	2095.84	2199.53	2365.52	2475.49	1746	1956	2806	2911	2672	2120	2141	2243	2348
Cxadr	NM_009988	13052	chr16	coxsackie virus and adenovirus receptor	11746	2.55679	0.258926	0.371893	0.834385	0.36071	0.186368	0.002566	0.8439	0.564607	0.0386444	1.8349	2.71938	2.45974	2.45169	2.64353	4.22802	1.65526	2.46179	1.78503	-0.0361227	0.50026	0.36222	0.375542	0.492531	1.10299	108.529	157.853	143.358	144.698	157.004	240.232	93.4934	139.204	101.221	109	157	150	147	167	243	91	132	96
Cxcl10	NM_021274	15945	chr5	chemokine (C-X-C motif) ligand 10	8040	17.0785	1.95196	1.49602	0.866653	0.000832276	0.0101128	0.136552	0.038721	0.11985	0.458162	18.8352	35.7264	17.9345	21.666	23.316	2.06077	6.2798	10.8095	4.75599	1.43278	2.32851	1.34095	1.63146	1.74648	-1.80363	884.169	1645.9	829.583	1014.86	1099.17	92.9229	281.496	485.108	214.04	888	1637	868	1031	1169	94	274	460	203
Cxcl12	NM_021704	20315	chr6	chemokine (C-X-C motif) ligand 12	6276	9.37323	-0.289004	-0.654622	0.138083	0.0621335	3.11724e-05	0.365759	0.465072	0.0017978	0.704871	8.29448	8.43604	7.08415	5.89373	9.35534	13.4219	9.99536	12.5049	9.25918	-0.287515	-0.290177	-0.53606	-0.783075	-0.107959	0.348447	1123.13	1121.06	945.235	796.334	1272.12	1745.88	1292.4	1618.84	1201.91	1128	1115	989	809	1353	1766	1258	1535	1140
Cxcl16	NM_023158	66102	chr11	chemokine (C-X-C motif) ligand 16	11293	2.00149	-0.8605	-0.912914	-0.317585	0.011252	0.00726162	0.33741	0.199177	0.0960264	0.681195	1.01982	1.79462	1.4205	1.28422	1.57737	2.57112	2.57464	3.76962	1.57913	-1.30022	-0.51758	-0.847015	-0.9735	-0.669832	-0.0319595	106.537	183.994	146.227	133.869	165.466	258.027	256.837	376.485	158.164	107	183	153	136	176	261	250	357	150
Cxcl9	NM_008599	17329	chr5	chemokine (C-X-C motif) ligand 9	11289	1.81599	-2.5283	-4.00359	-3.5003	0.00635979	7.09127e-05	0.000346966	0.142827	0.00343981	0.00822401	0.136538	1.25612	0.31295	0.183018	0.566431	0.132821	3.21102	8.72898	0.470184	-4.77627	-1.675	-3.64607	-4.37723	-2.77939	-4.86868	16.9245	152.823	38.2348	22.6358	70.5433	15.8123	380.122	1034.53	55.9058	17	152	40	23	75	16	370	981	53
Cxcr4	NM_009911	12767	chr1	chemokine (C-X-C motif) receptor 4	8869	7.07374	-0.756334	-0.925717	-0.792574	0.00098825	6.2561e-05	0.000564247	0.0433963	0.0031318	0.0118376	5.13199	6.9744	6.80337	3.95036	4.47503	7.48454	10.8265	10.9437	9.95907	-0.977272	-0.562704	-0.592601	-1.35684	-1.16836	-0.491856	397.278	529.865	518.977	305.143	347.871	556.586	800.298	809.952	739.068	399	527	543	310	370	563	779	768	701
Cyb561	NM_007805	13056	chr11	cytochrome b-561	3558	27.2017	-0.00253662	0.186577	0.287051	0.978989	0.0511398	0.00261471	0.998181	0.305238	0.039049	24.8031	24.4531	27.6337	28.4698	30.8079	29.8859	27.3305	24.2294	25.1047	0.0211024	-0.0264593	0.155733	0.216832	0.339852	0.232023	2618.66	2533.7	2874.89	2999.3	3266.36	3031.06	2755.32	2445.67	2540.86	2630	2520	3008	3047	3474	3066	2682	2319	2410
Cybb	NM_007807	13058	chrX	cytochrome b-245, beta polypeptide	10576	1.48488	-0.824658	-1.30974	-1.18575	0.03816	0.00127528	0.00334511	0.369164	0.0287889	0.0469371	0.86942	1.61224	1.06224	0.705645	0.812925	1.13723	1.79926	3.88004	1.13394	-1.31572	-0.455524	-1.04932	-1.61806	-1.40613	-0.987924	176.235	320.734	212.179	142.727	165.469	221.448	348.274	751.917	220.371	177	319	222	145	176	224	339	713	209
Cybrd1	NM_028593	73649	chr2	cytochrome b reductase 1	9216	2.20466	-0.138755	-0.758276	0.168584	0.531056	0.000850409	0.441706	0.913153	0.0217711	0.756218	2.15937	2.2587	1.5056	1.36707	1.80725	3.75066	2.39135	2.39727	2.76617	-0.157554	-0.119822	-0.697694	-0.818443	-0.407783	0.579838	479.921	492.665	329.731	303.177	403.341	800.772	507.509	509.389	589.352	482	490	345	308	429	810	494	483	559
Cyfip1	NM_011370	20430	chr7	cytoplasmic FMR1 interacting protein 1	3410	10.6058	0.0313179	-0.37314	-0.235472	0.741718	0.000107954	0.0140196	0.959838	0.00479094	0.127052	11.6659	11.8967	8.89751	8.88639	8.98911	10.8009	11.5737	12.136	12.1075	0.0306949	0.03187	-0.381219	-0.364912	-0.339152	-0.138349	3247.93	3250.58	2440.98	2468.74	2513.23	2888.7	3076.88	3230.31	3231.42	3262	3233	2554	2508	2673	2922	2995	3063	3065
Cyp2j6	NM_010008	13110	chr4	cytochrome P450, family 2, subfamily j, polypeptide 6	2975	22.3241	0.016093	-0.0709139	-0.292195	0.872738	0.481278	0.00397601	0.982172	0.804293	0.0529924	22.6115	25.1353	23.4487	21.4506	18.1255	20.8016	22.6162	24.4036	26.2947	-0.0480833	0.0774628	-0.0168677	-0.127212	-0.360943	-0.226339	3468.97	3784.47	3544.87	3283.78	2792.48	3065.66	3313.17	3579.39	3867.16	3484	3764	3709	3336	2970	3101	3225	3394	3668
Cyp2j9	NM_028979	74519	chr4	cytochrome P450, family 2, subfamily j, polypeptide 9	6498	14.0286	-0.094448	-0.587131	-0.119316	0.567778	0.000486742	0.470599	0.922065	0.0147382	0.776082	14.4264	15.066	10.6041	10.3332	10.541	18.8804	16.2885	16.089	16.5313	-0.11223	-0.0767552	-0.577099	-0.596286	-0.558437	0.217758	1196.82	1226.63	866.861	855.395	878.16	1504.66	1290.34	1276.1	1314.71	1202	1220	907	869	934	1522	1256	1210	1247
Cyp4b1	NM_007823	13120	chr4	cytochrome P450, family 4, subfamily b, polypeptide 1	12174	1.13443	0.240355	0.258052	1.2661	0.479192	0.445985	9.9862e-05	0.888994	0.785067	0.0030115	0.648455	1.16762	1.17831	0.654808	1.86447	1.85602	0.835422	0.870377	0.674932	-0.22316	0.586359	0.605258	-0.2125	1.28862	1.21855	51.7745	91.494	92.7137	52.1659	149.493	142.358	63.6963	66.4418	51.671	52	91	97	53	159	144	62	63	49
Cyp4f14	NM_022434	64385	chr17	cytochrome P450, family 4, subfamily f, polypeptide 14	11423	1.94025	-0.115799	-0.862923	-0.350344	0.597272	0.000165409	0.113938	0.932444	0.00669934	0.417634	2.0817	2.19627	1.20434	1.34006	1.53022	2.1516	2.48912	2.52869	2.18263	-0.140447	-0.0904736	-0.945758	-0.774961	-0.575907	-0.150688	196.15	203.099	111.817	125.996	144.784	194.755	223.961	227.801	197.162	197	202	117	128	154	197	218	216	187
Cyr61	NM_010516	16007	chr3	cysteine rich protein 61	4007	31.4348	6.22875	1.43189	2.34012	2.85575e-28	0.00356428	2.28216e-06	1.78698e-24	0.0593263	0.000129237	126.128	98.8563	2.45436	5.61941	13.1768	1.90259	1.46691	1.87366	1.32161	6.39591	6.01739	0.69792	1.90733	3.14435	0.296095	10915.7	8396.41	209.293	485.286	1145.24	158.171	121.229	155.025	109.657	10963	8351	219	493	1218	160	118	147	104
Cyth2	NM_011181	19158	chr7	cytohesin 2	4236	21.6111	0.0809461	0.163956	0.353439	0.399109	0.0864901	0.000200922	0.859448	0.402688	0.00519532	20.6511	19.8217	21.5844	21.2568	24.165	25.1664	21.2255	19.0179	19.2162	0.123418	0.0372428	0.165937	0.161991	0.356099	0.35065	2224.36	2095.33	2290.93	2284.67	2613.84	2603.98	2183.09	1958.44	1984.19	2234	2084	2397	2321	2780	2634	2125	1857	1882
Cyth4	NM_028195	72318	chr15	cytohesin 4	11469	1.53587	-0.874178	-0.800799	0.126018	0.00142858	0.00329189	0.628314	0.0550111	0.0562667	0.860713	0.944645	1.02358	1.08306	0.985596	1.57218	2.41931	1.89691	2.36168	1.34813	-0.913881	-0.825932	-0.73932	-0.856287	-0.178091	0.37737	112.512	119.647	127.112	117.135	188.033	276.81	215.743	268.922	153.943	113	119	133	119	200	280	210	255	146
D10Bwg1379e	NM_001033258	215821	chr10	DNA segment, Chr 10, Brigham & Women's Genetics 1379 expressed	3630	8.1757	0.650155	0.388766	0.342169	1.23582e-05	0.00926166	0.022119	0.00179841	0.113528	0.169723	11.0128	8.61684	6.84939	9.51536	8.71875	7.25574	6.48376	6.95301	6.01939	0.827842	0.446927	0.121711	0.613939	0.497034	0.168125	3861.27	2965.04	2366.43	3329.06	3069.86	2443.83	2170.77	2330.71	2023.2	3878	2949	2476	3382	3265	2472	2113	2210	1919
D130009I18Rik	NR_015593	320249	chr14	RIKEN cDNA D130009I18 gene	6804	9.28114	0.0158986	-0.138581	-0.699609	0.899038	0.271244	6.2522e-08	0.983169	0.656853	4.92115e-06	9.4117	11.8229	9.32191	9.71565	6.73864	6.27362	10.217	10.7477	11.6262	-0.142858	0.158864	-0.177889	-0.100154	-0.618251	-0.785207	1068.37	1317.12	1042.72	1100.5	768.167	684.113	1107.47	1166.42	1265.16	1073	1310	1091	1118	817	692	1078	1106	1200
D430041D05Rik	NM_001033347	241589	chr2	RIKEN cDNA D430041D05 gene	7827	1.82068	0.172471	-0.418352	-0.439149	0.198328	0.00233401	0.00141003	0.721324	0.0435762	0.0248543	2.44568	2.03495	1.5134	1.46159	1.33953	1.62723	1.9826	2.16045	2.03941	0.310798	0.018789	-0.402002	-0.43409	-0.550529	-0.334199	1056.42	862.666	644.172	629.98	581.055	675.217	817.764	892.212	844.496	1061	858	674	640	618	683	796	846	801
D630045J12Rik	NM_194061	330286	chr6	RIKEN cDNA D630045J12 gene	7046	2.15869	0.322633	-0.345973	-0.210424	0.00658433	0.00456804	0.0824936	0.145285	0.0709889	0.353602	2.8245	2.63921	1.79214	1.64361	1.69798	2.12136	2.30276	2.24793	2.23885	0.383456	0.258589	-0.293438	-0.399996	-0.343939	-0.0870764	1322.27	1212.56	826.721	767.788	798.248	954.003	1029.39	1006.11	1004.75	1328	1206	865	780	849	965	1002	954	953
D8Ertd82e	NM_172911	244418	chr8	DNA segment, Chr 8, ERATO Doi 82, expressed	10896	1.27407	0.150171	-0.135441	0.771804	0.474509	0.524354	0.000161206	0.887135	0.827841	0.00431006	1.16171	1.1702	1.04606	0.865639	1.51467	2.11892	1.25	1.06532	0.948905	0.158118	0.14162	-0.0136341	-0.267339	0.545462	0.964645	236.973	234.267	210.264	176.196	310.265	415.214	243.478	207.766	185.566	238	233	220	179	330	420	237	197	176
D930028M14Rik	NA	NA	NA	NA	5685	34.58	-0.150437	-0.325649	-0.559067	0.223877	0.00887309	8.63481e-06	0.741838	0.110283	0.000394397	36.6445	35.6761	34.5439	29.4809	30.0745	24.7386	44.8583	40.6232	39.2463	-0.117839	-0.183517	-0.224167	-0.434546	-0.39662	-0.742126	1573.19	1503.13	1461.34	1262.91	1296.58	1020.24	1838.94	1667.36	1615.19	1580	1495	1529	1283	1379	1032	1790	1581	1532
Daam2	NM_001008231	76441	chr17	dishevelled associated activator of morphogenesis 2	4366	8.3296	0.174827	-0.546663	-0.380927	0.1957	7.74584e-05	0.00557877	0.718869	0.00367194	0.0664936	10.7493	10.2461	6.52702	6.19867	5.70542	8.77249	9.48379	8.95408	10.462	0.222052	0.12584	-0.518572	-0.574886	-0.685257	-0.128933	2772.99	2594.03	1659.18	1595.62	1478.03	2173.94	2336.17	2208.38	2587.24	2785	2580	1736	1621	1572	2199	2274	2094	2454
Dab2	NM_023118	13132	chr15	disabled homolog 2 (Drosophila)	8427	4.17027	-0.1959	-0.17672	0.5791	0.278048	0.327008	0.000996921	0.787912	0.696835	0.0189612	2.62322	4.05498	3.0592	3.68489	5.18239	6.34548	4.29829	4.11371	3.44843	-0.526414	0.0737081	-0.326289	-0.0402154	0.46025	0.688096	424.162	643.479	487.425	594.545	841.499	985.638	663.661	635.94	534.538	426	640	510	604	895	997	646	603	507
Dbi	NM_007830	13167	chr1	diazepam binding inhibitor	1246	302.155	-0.127294	-0.377816	-0.149749	0.305155	0.00251776	0.227912	0.80877	0.0457991	0.578318	279.029	324.971	279.899	227.3	253.41	347.968	377.218	327.448	319.618	-0.226869	-0.034078	-0.243601	-0.525748	-0.359712	0.0336895	6989.72	7989.2	6909.11	5681.64	6374.76	8373.48	9023.11	7842.17	7675.28	7020	7946	7229	5772	6780	8470	8783	7436	7280
Dbp	NM_016974	13170	chr7	D site albumin promoter binding protein	10033	4.75692	-1.09539	-2.36844	-1.1284	2.04616e-05	1.31561e-17	1.16401e-05	0.00261303	2.74413e-14	0.000509356	2.83654	5.40796	1.92335	1.47402	2.99416	5.15937	8.90945	9.35056	9.03074	-1.61237	-0.711783	-2.19059	-2.55334	-1.52876	-0.810267	203.119	380.054	135.717	105.322	215.297	354.91	609.214	640.159	619.931	204	378	142	107	229	359	593	607	588
Dcaf10	NM_153167	242418	chr4	DDB1 and CUL4 associated factor 10	5052	5.87805	0.0449056	0.450539	0.325263	0.742879	0.000870662	0.0165422	0.959838	0.0221021	0.141674	5.35343	5.04232	6.4217	7.3357	7.27269	5.41952	4.75697	5.42205	5.48084	0.100369	-0.013014	0.341492	0.551493	0.548245	0.0601454	1647.86	1523.24	1947.81	2253.17	2248.1	1602.53	1398.21	1595.65	1617.29	1655	1515	2038	2289	2391	1621	1361	1513	1534
Dcaf4	NM_030246	73828	chr12	DDB1 and CUL4 associated factor 4	7217	10.8703	0.127142	-0.104699	-0.350815	0.261694	0.3597	0.00242361	0.771811	0.722111	0.0371255	12.343	12.1818	9.94146	10.9205	8.80747	8.95218	11.7409	12.0752	11.0749	0.14984	0.103849	-0.183215	-0.0297498	-0.330457	-0.370916	1098.24	1063.75	871.638	969.58	786.97	765.179	997.548	1027.2	944.656	1103	1058	912	985	837	774	971	974	896
Dclre1b	NM_133865	140917	chr3	DNA cross-link repair 1B, PSO2 homolog (S. cerevisiae)	10562	1.60954	0.259798	0.529204	0.185818	0.139232	0.00224193	0.291059	0.649456	0.042641	0.63693	1.5453	1.67958	1.88163	2	1.50938	1.58032	1.28759	1.39251	1.50253	0.211594	0.30441	0.473596	0.579447	0.183817	0.186063	282.775	301.631	339.286	365.192	277.363	277.797	224.991	243.622	263.575	284	300	355	371	295	281	219	231	250
Dcp1a	NM_133761	75901	chr14	DCP1 decapping enzyme homolog A (S. cerevisiae)	9083	2.15117	-0.714091	-0.0223	-0.131123	1.62661e-06	0.876184	0.361964	0.000417167	0.968483	0.701778	1.52472	1.44913	2.33513	2.46554	2.12131	2.3789	2.34332	2.59133	2.64781	-0.663695	-0.763844	-0.0713048	0.0250552	-0.182336	-0.0811996	365.417	340.844	551.462	589.622	510.539	547.686	536.274	593.755	608.331	367	339	577	599	543	554	522	563	577
Dctn4	NM_026302	67665	chr18	dynactin 4	622	78.8376	0.0689132	0.242154	0.152332	0.420356	0.00446254	0.0742268	0.864814	0.0699858	0.338292	73.3127	77.98	85.6799	84.7149	83.1395	78.3522	68.9939	78.5278	76.4884	0.0375783	0.0995353	0.241227	0.243004	0.225116	0.0755385	11619.7	12129.6	13381.4	13397.9	13232.8	11929.5	10441.9	11899.3	11621.5	11670	12064	14001	13611	14074	12067	10164	11283	11023
Ddit3	NM_007837	13198	chr10	DNA-damage inducible transcript 3	6672	30.9873	-0.0323969	0.380358	0.770317	0.832884	0.0120001	2.84681e-07	0.979013	0.132752	1.94687e-05	24.7248	23.0972	36.6884	26.9907	44.6856	39.3432	29.7841	22.5843	23.641	0.0290187	-0.0961596	0.576658	0.152277	0.888242	0.64068	919.019	842.557	1343.78	1001.08	1667.97	1404.81	1057.13	802.576	842.39	923	838	1406	1017	1774	1421	1029	761	799
Ddn	NM_001013741	13199	chr15	dendrin	10338	1.97867	-0.136963	-1.18982	-0.595876	0.632784	7.35794e-05	0.0410399	0.940107	0.00351468	0.247525	2.12108	2.55473	1.36733	0.883845	0.962064	2.50181	2.76376	2.67473	2.54269	-0.261943	-0.0213027	-0.914149	-1.52207	-1.39159	-0.0822054	338.533	400.164	215.047	140.758	154.175	383.582	421.21	408.143	389.042	340	398	225	143	164	388	410	387	369
Ddr2	NM_022563	18214	chr1	discoidin domain receptor family, member 2	8167	2.00942	-0.229602	-0.4718	-0.0544927	0.153077	0.0036471	0.732491	0.666935	0.0602157	0.905779	1.64646	2.16322	1.68061	1.53363	1.87639	2.46972	2.08925	2.61606	2.22585	-0.424028	-0.0578509	-0.415656	-0.529374	-0.229686	0.102247	582.476	751.061	585.872	541.389	666.614	839.325	705.786	884.826	754.882	585	747	613	550	709	849	687	839	716
Ddx21	NM_019553	56200	chr10	DEAD (Asp-Glu-Ala-Asp) box polypeptide 21	5686	7.58633	0.239367	0.417957	0.574022	0.0569963	0.000827936	4.01062e-06	0.448466	0.0213642	0.00020962	6.52782	7.63783	7.10161	8.8945	9.31618	8.66892	5.88945	6.65431	6.08559	0.136065	0.335408	0.236301	0.578979	0.654954	0.487133	1321.28	1517.2	1416.41	1796.43	1893.63	1685.57	1138.29	1287.69	1180.82	1327	1509	1482	1825	2014	1705	1108	1221	1120
Ddx24	NM_020494	27225	chr12	DEAD (Asp-Glu-Ala-Asp) box polypeptide 24	1157	61.6428	0.184344	0.200591	0.263367	0.055047	0.0367238	0.00602232	0.440482	0.254087	0.0701763	63.6877	59.7901	59.0632	65.696	70.4788	60.8697	56.6054	56.9516	55.3204	0.242192	0.124021	0.112224	0.283866	0.39443	0.118968	8343.86	7687.57	7624.96	8588.42	9272.57	7660.7	7081.44	7133.46	6947.81	8380	7646	7978	8725	9862	7749	6893	6764	6590
Ddx3y	NM_012008	26900	chrY	DEAD (Asp-Glu-Ala-Asp) box polypeptide 3, Y-linked	3182	16.4636	0.0923455	0.351742	-0.0134009	0.420185	0.00198913	0.907119	0.864814	0.0391601	0.96678	16.3172	15.7389	18.8241	19.5141	15.6557	14.3601	13.578	17.7209	15.424	0.131249	0.0521343	0.316147	0.38618	0.0776382	-0.110952	3231	3058.54	3672.94	3855.68	3113.11	2731.51	2567.32	3354.75	2927.78	3245	3042	3843	3917	3311	2763	2499	3181	2777
Ddx54	NM_028041	71990	chr5	DEAD (Asp-Glu-Ala-Asp) box polypeptide 54	3530	17.3875	0.139501	0.157046	0.29961	0.224325	0.17095	0.00873939	0.741838	0.543973	0.0930347	18.0257	15.8355	15.31	18.935	19.2329	18.9377	16.9954	15.8276	14.9672	0.242457	0.0285673	-0.0142586	0.310322	0.342024	0.255712	3023.9	2607.1	2530.82	3169.6	3240.04	3051.82	2722.45	2538.48	2406.96	3037	2593	2648	3220	3446	3087	2650	2407	2283
Ddx58	NM_172689	230073	chr4	DEAD (Asp-Glu-Ala-Asp) box polypeptide 58	6191	6.2623	0.0806904	0.169414	0.505983	0.515627	0.170545	3.52569e-05	0.904437	0.543375	0.00127896	5.24885	6.0709	5.68775	6.32731	8.20688	7.08386	5.59505	5.87782	5.14594	-0.0135514	0.169124	0.080988	0.252708	0.636889	0.360736	1107.2	1256.8	1182.26	1331.82	1738.49	1435.45	1126.99	1185.4	1040.6	1112	1250	1237	1353	1849	1452	1097	1124	987
Dedd2	NM_207677	67379	chr7	death effector domain-containing DNA binding protein 2	8421	8.6457	0.0312165	0.185507	0.644643	0.836515	0.216584	1.28538e-05	0.980046	0.600433	0.00055091	8.13043	6.57953	8.26813	8.10576	12.2901	10.3823	7.97149	7.4379	6.97858	0.187564	-0.144269	0.190551	0.180077	0.788964	0.481912	634.253	503.725	635.57	630.965	962.798	778.03	593.802	554.736	521.884	637	501	665	641	1024	787	578	526	495
Dennd2a	NM_172477	209773	chr6	DENN/MADD domain containing 2A	7768	4.33856	-0.243129	0.412168	0.486266	0.076841	0.00202239	0.000260975	0.511252	0.0395473	0.0065322	3.2249	3.13414	4.69934	5.30599	4.69466	5.97039	4.02464	3.65439	4.01534	-0.209108	-0.277257	0.31214	0.505221	0.337977	0.620479	610.356	582.149	876.416	1002.06	892.271	1085.49	727.357	661.255	728.522	613	579	917	1018	949	1098	708	627	691
Dennd4c	NM_184088	329877	chr4	DENN/MADD domain containing 4C	9404	1.40592	-0.170667	0.626756	0.17291	0.380397	0.000909201	0.366771	0.850546	0.0228947	0.7052	0.934234	1.26627	1.66843	2.14487	1.56552	1.23796	1.10977	1.32031	1.41227	-0.390168	0.0203361	0.423223	0.803148	0.358824	-0.0430103	310.654	413.235	546.68	711.683	522.771	395.44	352.382	419.743	450.185	312	411	572	723	556	400	343	398	427
Dgkg	NM_138650	110197	chr16	diacylglycerol kinase, gamma	3719	11.4325	0.167561	-0.0913597	-0.477257	0.0785564	0.341331	9.77806e-07	0.516081	0.706101	5.8114e-05	12.9819	13.9985	10.561	11.9506	8.56467	8.83573	12.4016	12.1661	12.7382	0.12611	0.20777	-0.192766	0.00361515	-0.467608	-0.486674	3049.79	3227.45	2444.8	2801.45	2020.55	1994.01	2782.03	2732.53	2868.74	3063	3210	2558	2846	2149	2017	2708	2591	2721
Dgkh	NR_045588	380921	chr14	diacylglycerol kinase, eta	903	60.0038	0.356619	0.113276	-0.0550158	0.000352381	0.258774	0.584969	0.0219406	0.643592	0.842913	71.8655	68.5282	52.0382	66.3949	50.7498	55.8206	58.6765	55.9568	55.7551	0.403634	0.307962	-0.0832734	0.286307	-0.0921306	-0.0187728	11595.8	10851.7	8273.91	10690	8223.27	8652.27	9040.58	8632.08	8624.15	11646	10793	8657	10860	8746	8752	8800	8185	8180
Dgki	NM_001081206	320127	chr6	diacylglycerol kinase, iota	2798	19.5336	0.636196	0.173213	0.0138476	0.000119613	0.298891	0.934065	0.00972051	0.673515	0.977592	27.6857	22.9103	13.796	22.8545	15.9228	17.2815	17.7046	18.1133	14.8082	0.778343	0.478183	-0.24751	0.498628	-0.0134328	0.0406555	5432.47	4411.86	2667.48	4474.84	3137.55	3257.45	3317.28	3397.99	2785.46	5456	4388	2791	4546	3337	3295	3229	3222	2642
Dhh	NM_007857	13363	chr15	desert hedgehog	5360	16.248	0.0518395	-0.53318	0.0834111	0.782583	0.00533731	0.656685	0.966838	0.078584	0.874489	17.871	17.2216	12.7035	10.6839	12.2629	24.1867	19.012	16.0422	17.5511	0.0914935	0.011056	-0.421792	-0.653262	-0.445408	0.469953	1805.18	1707.23	1264.46	1076.87	1243.91	2346.95	1833.8	1549.25	1699.53	1813	1698	1323	1094	1323	2374	1785	1469	1612
Dhrs2	NM_027790	71412	chr14	dehydrogenase/reductase member 2	12084	1.78242	-0.262736	-2.42643	-0.396575	0.459592	3.0969e-09	0.266815	0.880826	9.22802e-07	0.615519	2.03444	2.16872	0.624887	0.308697	1.15472	2.74684	3.10928	2.11177	2.61156	-0.293321	-0.228749	-1.98769	-2.94645	-1.09507	0.0789403	110.521	115.626	33.4587	16.7291	62.9744	143.35	161.29	109.693	136.009	111	115	35	17	67	145	157	104	129
Dhrs7	NM_025522	66375	chr12	dehydrogenase/reductase (SDR family) member 7	5219	30.4602	-0.0148213	-0.148765	-0.367722	0.881126	0.135097	0.000253353	0.983169	0.493069	0.00638492	30.7394	34.2428	30.6759	28.4695	25.5235	25.7613	33.6789	34.5906	33.6767	-0.0805114	0.0480483	-0.104714	-0.194228	-0.342531	-0.393142	1710.59	1870.11	1682.12	1580.86	1426.33	1377.13	1789.63	1840.32	1796.53	1718	1860	1760	1606	1517	1393	1742	1745	1704
Dis3	NM_028315	72662	chr14	DIS3 mitotic control homolog (S. cerevisiae)	9336	3.04268	0.12139	0.561589	0.245611	0.468148	0.000631394	0.13939	0.885918	0.0174638	0.46271	2.68298	2.88313	3.56003	3.98101	3.38351	2.71476	2.3233	2.81267	2.81117	0.0821247	0.158675	0.468141	0.647215	0.422183	0.0412567	426.154	449.431	557.196	630.965	539.694	414.223	352.382	427.124	428.046	428	447	583	641	574	419	343	405	406
Dlgap4	NM_146128	228836	chr2	discs, large homolog-associated protein 4 (Drosophila)	2839	17.9565	0.159719	0.0560806	0.304021	0.0906972	0.55355	0.00121801	0.544585	0.845341	0.0222469	18.751	17.2529	16.5958	16.8933	19.7634	20.3931	17.921	16.0817	16.0919	0.231422	0.084252	0.0340981	0.0778398	0.313345	0.294572	3888.16	3510.99	3390.99	3495.41	4115.39	4062.18	3548.43	3188.13	3198.74	3905	3492	3548	3551	4377	4109	3454	3023	3034
Dmxl1	NM_001081371	240283	chr18	Dmx-like 1	3329	5.9351	0.424002	0.204464	0.0526668	1.20625e-05	0.0358061	0.590399	0.00177602	0.251325	0.845004	7.02575	6.94783	5.71597	6.27165	5.46383	5.42897	5.01079	5.616	5.55485	0.445228	0.402072	0.126442	0.278359	0.0886787	0.0154435	3661.14	3553.22	2935.1	3261.14	2859.24	2717.67	2493.35	2797.91	2774.91	3677	3534	3071	3313	3041	2749	2427	2653	2632
Dmxl2	NM_172771	235380	chr9	Dmx-like 2	778	23.5368	0.557024	0.159796	0.0401909	4.72413e-08	0.119867	0.696472	1.90718e-05	0.46575	0.892879	31.0982	28.6842	22.0428	23.3185	22.9505	19.1123	19.401	21.6868	22.0613	0.626991	0.483347	0.109282	0.208557	0.194806	-0.133212	14086	12751	9838.48	10539.4	10439.4	8316.14	8391.3	9391.41	9579.33	14147	12682	10294	10707	11103	8412	8168	8905	9086
Dnajb1	NM_018808	81489	chr8	DnaJ (Hsp40) homolog, subfamily B, member 1	3213	32.7095	-0.396544	-0.194943	0.288913	0.000610866	0.0896037	0.01075	0.0320223	0.408075	0.107451	27.516	23.9325	31.8634	27.3124	37.6193	46.0684	34.6872	32.6764	37.9172	-0.286828	-0.515109	-0.0964936	-0.300651	0.170307	0.398528	2658.48	2269.27	3033.55	2633.12	3649.97	4275.71	3200.16	3018.33	3511.86	2670	2257	3174	2675	3882	4325	3115	2862	3331
Dnajb14	NM_001033155	70604	chr3	DnaJ (Hsp40) homolog, subfamily B, member 14	6017	17.7831	0.494047	0.254303	0.0661836	0.00186331	0.111194	0.680054	0.0656883	0.454306	0.884247	21.7058	20.2845	14.1697	21.3301	16.12	15.3473	16.494	16.8136	13.0319	0.554772	0.430063	-0.0812776	0.526486	0.131902	-0.00287692	1714.57	1572.5	1102.92	1681.26	1278.71	1164.57	1244.11	1269.76	986.832	1722	1564	1154	1708	1360	1178	1211	1204	936
Dnajb5	NM_019874	56323	chr4	DnaJ (Hsp40) homolog, subfamily B, member 5	8583	6.39209	-0.0752962	-0.216472	0.529532	0.587013	0.120494	8.68734e-05	0.929548	0.466304	0.00267788	5.76982	5.46884	5.51221	4.67525	8.2666	8.99235	6.51836	5.93325	5.94896	-0.0239586	-0.128136	-0.110928	-0.32996	0.500108	0.557423	568.537	528.861	535.218	459.687	817.996	851.188	613.322	558.955	561.946	571	526	560	467	870	861	597	530	533
Dnajb9	NM_013760	27362	chr12	DnaJ (Hsp40) homolog, subfamily B, member 9	2897	45.3394	0.0702918	0.379742	0.281367	0.5436	0.000940372	0.0144584	0.91744	0.0233292	0.129234	38.5821	44.2806	49.8188	52.6895	52.5378	43.9249	36.9174	43.9638	41.6488	-0.0181217	0.15349	0.329308	0.428226	0.433258	0.110997	3070.7	3458.7	3907.1	4184.46	4199.08	3358.29	2805.67	3345.26	3177.65	3084	3440	4088	4251	4466	3397	2731	3172	3014
Dnajc13	NM_001163026	235567	chr9	DnaJ (Hsp40) homolog, subfamily C, member 13	1578	19.0144	0.371471	0.254347	0.127665	3.82829e-05	0.00491342	0.159315	0.00427778	0.0745708	0.494991	21.2373	21.4742	18.4287	20.8996	18.3995	17.962	16.1969	17.5169	17.5749	0.376915	0.365841	0.151074	0.350681	0.176096	0.0773626	6975.78	6922.43	5964.83	6850.07	6069.2	5667.67	5080.19	5500.91	5534	7006	6885	6241	6959	6455	5733	4945	5216	5249
Dnajc28	NM_138664	246738	chr16	DnaJ (Hsp40) homolog, subfamily C, member 28	10438	2.01982	-0.53105	-0.0820771	-0.391223	0.00278071	0.634646	0.0259322	0.0838569	0.882367	0.189017	1.65006	1.56197	2.21172	2.171	1.59505	1.98517	2.4462	2.53735	2.23085	-0.477553	-0.583342	-0.0775503	-0.0862053	-0.520266	-0.269538	248.922	231.251	328.774	326.802	241.631	287.684	352.379	365.956	322.622	250	230	344	332	257	291	343	347	306
Dnmt3a	NM_153743	13435	chr12	DNA methyltransferase 3A	7457	2.12129	-0.435332	-0.28627	-0.112942	0.000400073	0.018835	0.350136	0.0236175	0.176169	0.691892	1.80472	1.74841	2.13856	1.79989	2.10721	2.38057	2.44987	2.54107	2.47522	-0.399049	-0.471754	-0.175689	-0.406022	-0.169702	-0.0578673	749.752	712.855	875.465	746.132	879.11	950.048	971.865	1009.28	985.771	753	709	916	758	935	961	946	957	935
Dock10	NM_175291	210293	chr1	dedicator of cytokinesis 10	6979	3.21348	-0.0873149	-0.488562	-0.563995	0.512927	0.000315506	3.41326e-05	0.902293	0.0105859	0.00124305	3.40656	3.81388	2.65596	2.80251	2.18557	3.06557	3.78094	3.99688	4.13301	-0.156746	-0.0210002	-0.536657	-0.441159	-0.790246	-0.36664	1062.4	1167.31	816.205	872.13	684.478	918.414	1125.97	1191.73	1235.64	1067	1161	854	886	728	929	1096	1130	1172
Dock3	NM_153413	208869	chr9	dedicator of cyto-kinesis 3	2298	11.7482	0.306979	0.232942	0.101866	0.00359325	0.02736	0.336199	0.0977599	0.217111	0.680333	13.3046	12.4365	11.6512	12.781	12.2444	10.2337	10.3675	10.9664	11.0018	0.367745	0.243348	0.155111	0.306723	0.254054	-0.0687024	5145.71	4720.53	4440.41	4932.56	4755.7	3802.17	3828.89	4055.02	4079.07	5168	4695	4646	5011	5058	3846	3727	3845	3869
Dock7	NM_026082	67299	chr4	dedicator of cytokinesis 7	3672	9.24214	0.311415	0.129018	-0.00368849	0.000842542	0.168735	0.96875	0.0389093	0.540774	0.989943	10.0424	10.8778	8.80554	9.60186	8.39742	8.55618	8.58007	9.07587	8.52587	0.26655	0.354723	0.0557698	0.19874	0.0146325	-0.02236	3020.91	3211.37	2610.15	2882.17	2536.74	2472.5	2464.59	2610.19	2458.62	3034	3194	2731	2928	2698	2501	2399	2475	2332
Dock9	NM_134074	105445	chr14	dedicator of cytokinesis 9	3419	8.56601	0.322283	0.231123	0.0960057	0.000346081	0.0104453	0.289472	0.0217648	0.122171	0.636101	9.44515	9.45261	8.93528	8.78974	8.22774	8.05801	7.62061	7.99895	7.86214	0.335059	0.309127	0.2338	0.228227	0.142124	0.0480565	3313.65	3254.6	3088.98	3077.07	2898.73	2715.7	2552.94	2682.96	2644.18	3328	3237	3232	3126	3083	2747	2485	2544	2508
Dok1	NM_010070	13448	chr6	docking protein 1	10193	4.55778	0.243046	0.231095	0.494808	0.16585	0.18724	0.00427209	0.681197	0.565823	0.0558675	4.382	4.44225	4.10489	4.636	5.21449	5.38421	4.26001	4.03843	3.28389	0.246258	0.238905	0.131113	0.324211	0.502564	0.4848	337.538	335.816	311.568	356.333	403.355	398.407	313.338	297.406	242.499	339	334	326	362	429	403	305	282	230
Dopey1	NM_177208	320615	chr9	dopey family member 1	5265	4.37083	0.457409	0.229236	0.0600277	5.62959e-05	0.0448132	0.601312	0.00550424	0.284544	0.850195	5.38546	5.0229	3.9657	4.90999	4.07102	3.89588	3.86839	3.84729	4.06456	0.519504	0.391939	0.0570321	0.383109	0.122122	-0.00526269	2096.92	1919.38	1521.55	1907.66	1591.81	1457.2	1438.28	1432.18	1517.13	2106	1909	1592	1938	1693	1474	1400	1358	1439
Dot1l	NM_199322	208266	chr10	DOT1-like, histone H3 methyltransferase (S. cerevisiae)	9711	1.74366	0.00660195	0.118563	0.519169	0.968549	0.475818	0.00149902	0.995901	0.801512	0.0260197	1.53251	1.52625	1.896	1.40872	2.23867	2.15996	1.6028	1.58434	1.54339	0.0229442	-0.00995327	0.308083	-0.101348	0.574531	0.459091	372.387	363.969	453.982	341.565	546.272	504.187	371.898	368.067	359.52	374	362	475	347	581	510	362	349	341
Dpep1	NM_007876	13479	chr8	dipeptidase 1 (renal)	11535	1.88792	-0.574275	1.5893	1.63881	0.065678	2.22044e-08	7.74123e-09	0.479494	5.34399e-06	7.87654e-07	0.665437	0.620496	2.25862	3.50242	3.7935	2.19231	1.02237	1.04824	0.907282	-0.506083	-0.631957	1.21998	1.86863	1.99268	1.1407	63.7238	58.316	213.121	334.679	364.819	201.672	93.4896	95.9729	83.2975	64	58	223	340	388	204	91	91	79
Dpysl2	NM_009955	12934	chr14	dihydropyrimidinase-like 2	621	65.3092	-0.384675	-0.165737	-0.0798592	0.000146607	0.0995649	0.426344	0.0114143	0.430714	0.746496	52.5284	56.7777	72.2968	54.8639	66.4479	69.7343	72.9079	76.9166	71.8075	-0.427845	-0.342703	0.011725	-0.368202	-0.0826665	-0.0770514	9934.97	10539	13474.2	10354.3	12620.7	12670	13167.4	13908.3	13019.5	9978	10482	14098	10519	13423	12816	12817	13188	12349
Drp2	NM_010078	13497	chrX	dystrophin related protein 2	2252	15.0475	-0.234816	-0.41229	-0.115405	0.0740383	0.00181321	0.378174	0.503034	0.0366005	0.712778	13.7492	15.0854	14.6367	10.8479	13.3184	18.3688	16.5353	17.8384	18.3164	-0.289121	-0.182416	-0.220127	-0.63407	-0.328959	0.0707651	4097.25	4411.86	4298.01	3225.7	3985.63	5258.39	4705.21	5082.22	5232.47	4115	4388	4497	3277	4239	5319	4580	4819	4963
Dst	NM_134448	13518	chr1	dystonin	107	36.8808	0.496135	0.0424387	0.196166	1.87592e-06	0.685998	0.060793	0.000460335	0.904569	0.305062	49.1815	40.9354	33.688	32.1181	40.5439	33.1709	32.3594	33.0493	33.9378	0.634671	0.342834	0.0675744	0.0168479	0.36213	0.00854296	50940.4	41611	34383.1	33195.1	42171.3	33004.6	32004.7	32727	33697.4	51161	41386	35975	33723	44852	33385	31153	31032	31962
Dtnbp1	NM_025772	94245	chr13	dystrobrevin binding protein 1	4856	34.3744	-0.0222601	0.18192	0.346828	0.823836	0.0665184	0.000435527	0.976355	0.351469	0.00975065	29.6369	31.1905	37.3017	32.7153	37.867	41.4195	33.313	31.5513	31.0831	-0.0456796	0.000927472	0.264772	0.0936982	0.313755	0.379069	1656.82	1711.25	2054.86	1824.98	2125.86	2224.36	1778.32	1686.34	1665.79	1664	1702	2150	1854	2261	2250	1731	1599	1580
Dtx2	NM_023742	74198	chr5	deltex 2 homolog (Drosophila)	8863	5.44503	0.14673	0.192508	0.480015	0.377318	0.245401	0.00343171	0.850546	0.631067	0.0477199	5.17561	4.94425	5.31222	5.12771	6.92147	5.91401	5.68245	4.48251	4.03956	0.192459	0.0995779	0.20878	0.175959	0.617229	0.326684	556.589	521.822	562.933	550.248	747.484	610.956	583.526	460.876	416.457	559	519	589	559	795	618	568	437	395
Dtx3l	NM_001013371	209200	chr16	deltex 3-like (Drosophila)	7482	4.08475	-0.0571828	0.0911955	0.452465	0.663606	0.484638	0.000441812	0.947762	0.805763	0.00981404	3.20639	3.8181	3.93057	3.84151	5.31026	4.75232	3.71278	4.10608	3.52672	-0.17372	0.0508142	0.0984869	0.0835564	0.559383	0.335409	708.929	828.48	856.348	847.521	1179.05	1009.36	783.862	867.954	747.503	712	824	896	861	1254	1021	763	823	709
Dtx4	NM_172442	207521	chr19	deltex 4 homolog (Drosophila)	6653	4.52286	-0.611006	-0.253101	0.0614429	3.99245e-07	0.0323829	0.5987	0.000142759	0.238978	0.84942	3.21066	3.40339	4.17928	4.28667	4.64651	6.01421	5.32618	5.11601	5.24807	-0.639184	-0.582233	-0.280438	-0.225766	-0.100406	0.207563	790.575	822.448	1014.05	1053.25	1148.95	1422.6	1252.33	1204.38	1238.8	794	818	1061	1070	1222	1439	1219	1142	1175
Dusp1	NM_013642	19252	chr17	dual specificity phosphatase 1	6040	16.7702	0.949468	0.269973	0.698102	3.26477e-08	0.120689	5.10264e-05	1.40892e-05	0.466325	0.00172514	22.1425	22.7459	13.9388	14.0576	23.8603	13.9328	11.9434	11.5401	12.6203	0.942956	0.954658	0.254489	0.284835	1.05678	0.217183	1835.05	1850	1138.29	1162.51	1985.78	1109.21	945.154	914.363	1002.64	1843	1840	1191	1181	2112	1122	920	867	951
Dusp11	NM_028099	72102	chr6	dual specificity phosphatase 11 (RNA/RNP complex 1-interacting)	4379	8.15018	0.505357	0.507818	0.384553	1.40784e-05	1.26416e-05	0.000977487	0.00196851	0.000884609	0.0186767	8.39499	9.4736	9.1986	8.67657	9.11144	7.41002	6.04215	6.89409	6.60908	0.429583	0.57683	0.540193	0.474048	0.553765	0.191696	2305.02	2552.81	2488.77	2377.19	2512.3	1954.47	1584.16	1809.73	1739.59	2315	2539	2604	2415	2672	1977	1542	1716	1650
Dusp15	NM_145744	252864	chr2	dual specificity phosphatase-like 15	6104	9.71666	-0.0259894	-0.195864	-0.450204	0.817293	0.0835052	8.37841e-05	0.974973	0.395533	0.00258975	10.9744	10.2611	10.0277	8.84346	8.09121	7.86589	10.6789	10.9905	11.932	0.034576	-0.0893694	-0.1167	-0.279762	-0.398722	-0.503393	1461.67	1341.25	1316.06	1175.31	1082.2	1006.4	1358.14	1399.49	1523.46	1468	1334	1377	1194	1151	1018	1322	1327	1445
Dusp16	NM_130447	70686	chr6	dual specificity phosphatase 16	8099	4.14254	-0.0765602	0.0205541	0.355379	0.546896	0.870719	0.00429603	0.918412	0.966875	0.0559945	3.51723	3.82742	3.8812	3.96417	4.84728	5.14764	4.18965	3.76572	4.07146	-0.124469	-0.0297624	-0.00383079	0.0447396	0.343696	0.366384	622.304	664.594	676.666	699.869	861.247	874.914	707.837	636.998	690.568	625	661	708	711	916	885	689	604	655
Dusp18	NM_173745	75219	chr11	dual specificity phosphatase 18	9319	2.39287	-0.28228	-0.535961	-0.0174475	0.112188	0.00286132	0.920803	0.591932	0.0508657	0.972405	2.16596	2.29598	1.99214	1.74667	2.10303	3.332	2.67784	2.82931	2.92098	-0.310557	-0.253656	-0.452132	-0.623257	-0.34697	0.251796	428.145	445.409	388.032	344.519	417.449	632.708	505.454	534.697	553.508	430	443	406	350	444	640	492	507	525
Dusp6	NM_026268	67603	chr10	dual specificity phosphatase 6	5833	12.3576	0.858783	0.143101	0.440708	1.7197e-14	0.210547	9.7434e-05	1.95655e-11	0.59316	0.00295968	16.1747	17.4579	10.2792	10.1737	13.6172	11.7085	9.29296	10.1565	9.35215	0.816113	0.899137	0.141319	0.144546	0.574029	0.292311	1930.64	2045.06	1209.02	1211.73	1632.24	1342.52	1059.19	1159.03	1070.12	1939	2034	1265	1231	1736	1358	1031	1099	1015
Dync1h1	NM_030238	13424	chr12	dynein cytoplasmic 1 heavy chain 1	169	48.3277	0.687475	0.155024	0.312514	3.59471e-09	0.18689	0.00761109	1.79951e-06	0.565751	0.0836285	70.2825	54.1745	43.2934	42.7817	53.7629	42.8928	40.3483	39.0856	40.7728	0.874762	0.472141	0.154537	0.155499	0.494299	0.104407	43183.9	32667.7	26212.4	26229.9	33173.3	25317.2	23673	22960.2	24015.8	43371	32491	27426	26647	35282	25609	23043	21771	22779
Dyrk1a	NM_007890	13548	chr16	dual-specificity tyrosine-(Y)-phosphorylation regulated kinase 1a	2887	14.1611	0.17889	0.382179	0.246586	0.108689	0.00057081	0.02669	0.5873	0.0161988	0.191717	13.7354	13.7455	15.4694	16.137	16.0454	12.9257	11.8782	13.352	12.4851	0.191749	0.165743	0.342001	0.421051	0.422033	0.0461875	3525.73	3462.73	3912.83	4133.27	4136.08	3187.26	2911.48	3276.71	3072.22	3541	3444	4094	4199	4399	3224	2834	3107	2914
Dysf	NM_021469	26903	chr6	dysferlin	2259	15.6555	0.190895	0.129459	0.322468	0.0707885	0.221039	0.00219241	0.495061	0.605249	0.0344266	17.0192	14.7969	14.3905	16.0815	18.2634	16.8755	13.8448	13.9723	15.5118	0.300729	0.0718316	0.0375168	0.21588	0.408581	0.230563	4971.47	4241.94	4142.21	4687.46	5357.44	4735.41	3861.77	3902.1	4343.7	4993	4219	4334	4762	5698	4790	3759	3700	4120
Dzip3	NM_027341	224170	chr16	DAZ interacting protein 3, zinc finger	4421	8.75917	0.418602	-0.0686696	-0.18106	1.85731e-05	0.489128	0.0693666	0.00240038	0.807921	0.327894	10.8109	11.577	7.65609	8.29146	7.056	7.85599	8.39634	8.42965	9.18589	0.382136	0.45381	-0.136665	-0.0035931	-0.227062	-0.136195	2662.47	2798.13	1857.97	2037.6	1745.06	1858.58	1974.55	1984.8	2168.69	2674	2783	1944	2070	1856	1880	1922	1882	2057
E230016M11Rik	NA	NA	NA	NA	12228	1.07249	0.192725	0.591275	0.870902	0.530778	0.048338	0.00317213	0.913153	0.295206	0.0455789	0.820986	0.967355	1.18671	1.16761	1.68097	1.19071	0.744021	0.821529	0.862947	0.082842	0.289355	0.586232	0.581036	1.11098	0.554756	61.732	71.3862	87.9252	87.6054	126.935	86.006	53.4256	59.0629	62.2053	62	71	92	89	135	87	52	56	59
E2f2	NM_177733	242705	chr4	E2F transcription factor 2	11100	1.08905	-0.202549	-0.567098	-0.256051	0.316183	0.00593686	0.205483	0.816052	0.0848172	0.554749	1.01443	1.21605	0.777108	0.951374	1.14376	1.01796	1.28236	1.30935	1.39246	-0.32322	-0.0898165	-0.726723	-0.418433	-0.14485	-0.375909	205.111	241.305	154.824	191.947	232.236	197.719	247.592	253.114	269.902	206	240	162	195	247	200	241	240	256
Ebf3	NM_010096	13593	chr7	early B-cell factor 3	1566	28.8979	0.106612	0.129134	-0.318735	0.319164	0.227223	0.00325466	0.820193	0.612733	0.0463815	29.2868	32.9059	29.85	33.2082	25.4384	21.1388	28.0517	31.3037	30.3326	0.0343632	0.175361	0.0406145	0.212513	-0.162764	-0.493844	6277.81	6922.43	6305.07	7103.04	5475.91	4352.82	5741.8	6415.26	6233	6305	6885	6597	7216	5824	4403	5589	6083	5912
Ece1	NM_199307	230857	chr4	endothelin converting enzyme 1	2439	20.8408	0.177527	0.131431	0.273672	0.0676599	0.176498	0.00472473	0.486133	0.551253	0.0591828	21.1857	20.8514	18.8441	21.82	23.3884	21.8921	19.7981	18.9465	19.0075	0.202289	0.152274	0.0121226	0.241728	0.351041	0.191662	4354.14	4205.74	3816.3	4474.84	4827.15	4322.18	3885.39	3722.82	3744.86	4373	4183	3993	4546	5134	4372	3782	3530	3552
Ecscr	NM_001033141	68545	chr18	endothelial cell-specific chemotaxis regulator	11280	4.24936	-0.0705449	-0.693874	-0.101094	0.727757	0.000968055	0.617758	0.955007	0.0237301	0.856174	4.53617	4.55934	3.08905	2.80887	3.91005	5.10091	5.1511	4.83938	4.84808	-0.0604199	-0.0800522	-0.632715	-0.750913	-0.267665	0.050417	215.068	212.148	144.316	132.885	186.156	232.322	233.207	219.367	220.353	216	211	151	135	198	235	227	208	209
Ednra	NM_010332	13617	chr8	endothelin receptor type A	10493	1.89737	-0.170279	-0.485041	-0.759284	0.348269	0.00852309	5.11408e-05	0.838996	0.10744	0.00172514	1.94059	2.201	1.82797	1.49749	1.25869	1.52252	2.26988	2.6608	2.3062	-0.249022	-0.0949137	-0.356131	-0.624669	-0.865022	-0.655447	301.693	335.816	280.034	232.303	196.5	227.379	336.971	395.483	343.707	303	334	293	236	209	230	328	375	326
Ednrb	NM_007904	13618	chr14	endothelin receptor type B	1608	34.4702	-0.116711	-0.332388	-0.744087	0.267975	0.00172149	4.76908e-12	0.780561	0.0353882	9.18232e-10	33.8007	42.9964	32.1938	33.7937	23.6873	26.4516	40.073	42.7651	46.3692	-0.285573	0.0344626	-0.377056	-0.28898	-0.792329	-0.697133	5776.98	7212	5421.96	5763.35	4065.56	4342.94	6540.04	6987.93	7597.26	5802	7173	5673	5855	4324	4393	6366	6626	7206
Eea1	NM_001001932	216238	chr10	early endosome antigen 1	1346	21.2277	0.293215	0.0804332	0.0191863	0.000505477	0.342501	0.821159	0.0277458	0.706391	0.936895	24.4485	23.5809	21.33	20.0893	19.6243	20.4562	19.0819	21.2108	20.6112	0.332196	0.253003	0.114135	0.0458046	0.0212129	0.0170853	8175.59	7738.85	7028.58	6703.4	6590.08	6571.25	6093.15	6781.22	6607.28	8211	7697	7354	6810	7009	6647	5931	6430	6267
Efemp1	NM_146015	216616	chr11	epidermal growth factor-containing fibulin-like extracellular matrix protein 1	7771	9.19702	-0.22679	-0.619586	-0.528268	0.215849	0.000867906	0.00436433	0.733795	0.0220769	0.0565313	8.38848	10.8361	7.37879	7.23225	5.68968	10.127	11.8501	12.0738	10.987	-0.407546	-0.0656823	-0.613503	-0.624303	-0.960648	-0.194032	728.842	923.997	631.747	627.027	496.426	845.258	983.165	1002.95	915.136	732	919	661	637	528	855	957	951	868
Efemp2	NM_021474	58859	chr19	epidermal growth factor-containing fibulin-like extracellular matrix protein 2	9581	6.61438	-0.246495	-0.773028	-0.026815	0.190722	6.31314e-05	0.885648	0.715859	0.00314777	0.962059	5.89295	6.8194	4.3674	4.44195	5.79514	9.206	8.70067	7.69152	7.02254	-0.34031	-0.157171	-0.792416	-0.750012	-0.35838	0.244102	391.304	444.403	285.765	294.318	386.421	587.232	551.681	488.295	447.03	393	442	299	299	411	594	537	463	424
Efna5	NM_207654	13640	chr17	ephrin A5	4651	9.04633	0.0430851	-0.111199	-0.310131	0.661603	0.260984	0.0018705	0.947493	0.646136	0.0306806	9.48506	10.1442	8.84453	8.77228	7.8556	7.62862	9.20698	10.4334	9.94921	0.00767109	0.07749	-0.114371	-0.10809	-0.258046	-0.364311	2095.92	2199.9	1925.83	1934.24	1743.19	1619.33	1942.7	2204.16	2107.54	2105	2188	2015	1965	1854	1638	1891	2090	1999
Efs	NM_010112	13644	chr14	embryonal Fyn-associated substrate	11373	1.22955	-0.342047	-1.08268	-0.149643	0.158096	1.86671e-05	0.532383	0.674589	0.00119804	0.815716	1.27407	1.13614	0.846493	0.595539	1.11204	1.68153	1.77909	1.41152	1.55884	-0.247988	-0.439319	-0.855178	-1.3399	-0.437217	0.0928273	194.159	169.92	127.117	90.5566	170.169	246.163	258.889	205.66	227.733	195	169	133	92	181	249	252	195	216
Egfl8	NM_152922	81701	chr17	EGF-like domain 8	7298	18.4223	-0.196279	-0.652897	-0.497519	0.14872	2.49282e-06	0.00029943	0.665016	0.000257831	0.00727643	18.9445	20.9903	16.0711	13.0002	14.7913	17.9507	24.6647	20.9658	25.4141	-0.257679	-0.136938	-0.515916	-0.80333	-0.608223	-0.393216	932.958	1014.49	779.891	638.838	731.492	849.211	1159.87	987.135	1199.79	937	1009	816	649	778	859	1129	936	1138
Egr1	NM_007913	13653	chr18	early growth response 1	2978	28.5224	3.87079	-0.033695	1.0172	2.12914e-30	0.917636	0.00149557	2.66462e-26	0.977123	0.0260197	94.7023	85.5788	7.42064	4.62771	18.2831	6.6176	4.23464	6.71464	8.19618	3.95323	3.78002	0.259615	-0.402653	1.58692	0.0578707	12415.2	11010.5	958.621	605.369	2407.01	833.389	530.115	841.59	1030.04	12469	10951	1003	615	2560	843	516	798	977
Egr2	NM_010118	13654	chr10	early growth response 2	8988	4.40416	0.614544	-0.00551542	-0.2823	0.000118444	0.973027	0.0874891	0.00968844	0.994995	0.363884	5.79166	6.31544	4.36163	3.50832	3.5222	3.01747	4.19189	4.52463	3.56367	0.564031	0.66173	0.134377	-0.160998	-0.146136	-0.4326	732.825	784.241	543.821	442.953	447.55	366.77	506.48	547.349	432.271	736	780	569	450	476	371	493	519	410
Egr3	NM_018781	13655	chr14	early growth response 3	9504	2.83269	2.17189	-0.0767219	0.326587	2.74851e-13	0.801433	0.278202	2.86647e-10	0.95215	0.626572	7.68892	5.66069	1.93118	0.883564	1.25224	2.52863	1.34779	1.36855	1.89026	2.38298	1.91454	0.371944	-0.73282	-0.223539	0.723071	1270.5	917.965	314.451	145.678	207.773	401.375	212.664	216.207	299.415	1276	913	329	148	221	406	207	205	284
Ehd1	NM_010119	13660	chr19	EH-domain containing 1	4370	16.2597	0.0555969	-0.0843344	0.359209	0.61371	0.44576	0.000991696	0.933909	0.785067	0.0189193	16.2194	15.1796	14.0354	14.442	17.0305	22.1828	16.1708	14.8172	15.9634	0.11558	-0.00702445	-0.114193	-0.0548992	0.192024	0.509196	2202.46	2022.94	1878.04	1956.88	2322.36	2893.65	2096.8	1923.64	2078.02	2212	2012	1965	1988	2470	2927	2041	1824	1971
Ehd2	NM_153068	259300	chr7	EH-domain containing 2	6015	10.4987	-0.210173	0.39899	0.125175	0.0502647	0.000137608	0.236146	0.421624	0.00575307	0.586849	8.33173	8.50992	12.2262	13.4327	10.6255	10.8038	10.3218	9.73769	10.2057	-0.21171	-0.208262	0.319931	0.473732	0.144919	0.104932	1087.29	1089.89	1572.2	1749.18	1392.48	1354.39	1286.23	1214.93	1276.76	1092	1084	1645	1777	1481	1370	1252	1152	1211
Ehd4	NM_133838	98878	chr2	EH-domain containing 4	3015	23.9374	0.12327	0.0301658	0.29487	0.206681	0.757862	0.00239274	0.729102	0.933895	0.0368329	24.0552	23.461	23.3521	21.1709	24.8353	29.2418	23.9529	21.43	22.4006	0.154498	0.091353	0.0904894	-0.0328267	0.206602	0.378171	3476.94	3328	3326.01	3053.44	3604.84	4060.2	3305.98	2961.38	3103.85	3492	3310	3480	3102	3834	4107	3218	2808	2944
Eif1a	NM_010120	13664	chr18	eukaryotic translation initiation factor 1A	2065	40.5412	0.0164644	0.244301	0.393712	0.86437	0.0107349	3.69389e-05	0.982172	0.124166	0.00132461	35.0424	37.6654	43.1746	41.8721	44.9007	50.4253	33.8363	37.413	40.3803	-0.0226171	0.0544226	0.257173	0.231103	0.341023	0.444388	4305.35	4541.56	5226.99	5133.36	5539.84	5951.4	3969.64	4394.61	4755.93	4324	4517	5469	5215	5892	6020	3864	4167	4511
Eif2ak3	NM_010121	13666	chr6	eukaryotic translation initiation factor 2 alpha kinase 3	3682	14.4886	0.159036	0.257518	0.37913	0.0901506	0.00588175	4.70645e-05	0.544585	0.0843186	0.00162262	13.5757	14.2513	14.4325	15.3215	16.5085	16.1609	12.2858	13.3729	13.0519	0.137283	0.180262	0.204323	0.308644	0.425447	0.330752	2604.72	2683.51	2728.66	2933.35	3180.8	2978.66	2250.9	2453.05	2400.64	2616	2669	2855	2980	3383	3013	2191	2326	2277
Eif2s2	NM_026030	67204	chr2	eukaryotic translation initiation factor 2, subunit 2 (beta)	2730	35.8784	0.103226	0.304784	0.153579	0.308168	0.00247586	0.128736	0.809582	0.0452341	0.44408	31.3073	37.9733	41.4314	38.1096	37.3927	34.8248	32.3939	33.5942	34.1192	-0.0279295	0.223411	0.354967	0.252539	0.234341	0.0677112	3357.46	3996.61	4378.28	4078.14	4027.01	3587.64	3317.28	3444.4	3507.65	3372	3975	4581	4143	4283	3629	3229	3266	3327
Eif3a	NM_010123	13669	chr19	eukaryotic translation initiation factor 3, subunit A	1234	34.7175	0.359254	0.262426	0.24311	1.39656e-05	0.00153786	0.00335546	0.00196851	0.0330125	0.0469726	37.0579	38.9971	35.2732	35.7592	35.9827	34.7334	29.8478	30.0887	32.1495	0.335761	0.382263	0.243336	0.281189	0.29937	0.184376	8185.54	8453.72	7677.53	7881.66	7981.63	7370.05	6295.53	6354.1	6807.59	8221	8408	8033	8007	8489	7455	6128	6025	6457
Eif3b	NM_133916	27979	chr5	eukaryotic translation initiation factor 3, subunit B	1563	49.7954	0.155808	0.166496	0.314785	0.0772841	0.0588931	0.000337643	0.511751	0.329663	0.0080444	50.7622	47.2122	46.7817	51.8355	55.3894	54.9466	46.5968	44.8389	45.2433	0.220108	0.0884558	0.0810899	0.247178	0.352023	0.276426	6425.17	5864.72	5834.84	6546.89	7040.46	6680.99	5631.87	5426.03	5489.72	6453	5833	6105	6651	7488	6758	5482	5145	5207
Eif4ebp1	NM_007918	13685	chr8	eukaryotic translation initiation factor 4E binding protein 1	11223	5.07181	-0.221303	0.349378	0.73827	0.315336	0.101348	0.000432893	0.815058	0.435111	0.00974398	3.44865	3.79312	5.5372	5.20757	8.00655	6.14561	4.00907	4.42671	4.67616	-0.276121	-0.16657	0.382106	0.311998	0.939446	0.495314	144.374	155.843	228.421	217.539	336.605	247.149	160.269	177.181	187.666	145	155	239	221	358	250	156	168	178
Eif4g1	NM_145941	208643	chr16	eukaryotic translation initiation factor 4, gamma 1	578	56.6553	0.28138	0.100361	0.21203	0.00223207	0.277334	0.0213936	0.073655	0.660845	0.165886	65.1631	57.8742	56.2473	52.2659	61.437	56.7737	54.6802	48.8012	53.8835	0.377061	0.178862	0.14358	0.055788	0.298201	0.120301	15063.8	13130	12812.8	12056.3	14262.4	12607.7	12070.2	10785.6	11941	15129	13059	13406	12248	15169	12753	11749	10227	11326
Eif4g3	NM_172703	230861	chr4	eukaryotic translation initiation factor 4 gamma, 3	1126	31.0281	0.306155	0.0633019	0.0567889	0.00132147	0.509023	0.553619	0.0523362	0.818537	0.826007	37.0445	33.9161	31.4801	28.4742	31.5176	28.6407	28.7262	28.4257	32.0432	0.381216	0.226864	0.125198	-0.00145627	0.154223	-0.0478734	9704.96	8720.16	8126.73	7443.62	8291.91	7207.91	7186.23	7119.75	8047.44	9747	8673	8503	7562	8819	7291	6995	6751	7633
Eif5	NM_178041	217869	chr12	eukaryotic translation initiation factor 5	349	106.755	-0.00907711	0.233706	0.176856	0.910907	0.00375871	0.0285082	0.984806	0.0616517	0.199989	95.0748	101.257	112.964	119.03	111.192	114.022	95.2114	105.292	106.335	-0.0413433	0.0224598	0.186141	0.27972	0.190647	0.162874	16091.3	16819	18839.7	20102.3	18898.7	18538.3	15387.5	17037.4	17252.5	16161	16728	19712	20422	20100	18752	14978	16155	16364
Eif5b	NM_198303	226982	chr1	eukaryotic translation initiation factor 5B	4439	6.51925	0.422268	0.095335	0.0604548	2.18546e-05	0.342448	0.547618	0.00273511	0.706391	0.822939	8.16033	7.43572	6.47123	5.9591	5.75155	6.51056	5.75223	6.11328	6.22387	0.500352	0.339182	0.144684	0.043903	0.00197171	0.11672	2715.24	2428.13	2121.76	1978.53	1921.83	2081.01	1827.64	1944.73	1985.24	2727	2415	2220	2010	2044	2105	1779	1844	1883
Eif6	NM_010579	16418	chr2	eukaryotic translation initiation factor 6	4333	35.2721	-0.0176763	0.116918	0.35771	0.853777	0.220159	0.000156204	0.982172	0.603985	0.00423059	32.4462	30.719	35.2246	34.0786	41.4287	41.2139	34.9748	32.0906	32.3047	0.0343681	-0.0715726	0.131629	0.102043	0.392877	0.321376	2070.03	1923.4	2214.47	2169.5	2654.27	2525.88	2130.7	1957.38	1975.76	2079	1913	2317	2204	2823	2555	2074	1856	1874
Elavl4	NM_010488	15572	chr4	ELAV (embryonic lethal, abnormal vision, Drosophila)-like 4 (Hu antigen D)	386	94.6795	-0.00914814	-0.229813	-0.3355	0.930449	0.0292666	0.00151183	0.989595	0.224844	0.0261694	94.6954	110.364	89.7907	85.9198	69.742	95.6427	102.993	108.289	109.085	-0.109309	0.0845084	-0.20726	-0.252716	-0.544464	-0.152893	16544.3	18923.3	15458.3	14978.8	12236.2	16052	17182.2	18087.8	18269.9	16616	18821	16174	15217	13014	16237	16725	17151	17329
Elf1	NM_007920	13709	chr14	E74-like factor 1	5790	8.11782	-0.0957158	0.446162	0.434881	0.409055	8.62057e-05	0.000129908	0.859448	0.00402561	0.00366998	6.02594	6.98874	9.29099	9.62437	9.88637	9.03756	6.61249	7.47612	7.50245	-0.192031	-0.00542377	0.410931	0.479869	0.527784	0.334363	1088.29	1238.7	1653.44	1734.42	1793.02	1567.93	1140.35	1290.86	1298.9	1093	1232	1730	1762	1907	1586	1110	1224	1232
Elf2	NM_023502	69257	chr3	E74-like factor 2	6842	4.27264	-0.154598	0.33492	0.197388	0.199392	0.00452803	0.0958601	0.723108	0.0705708	0.381686	3.29415	3.77598	4.78059	5.12861	4.797	4.28354	4.03801	4.08324	4.09721	-0.241749	-0.0720742	0.273777	0.393182	0.306008	0.0788542	829.407	933.046	1186.08	1288.51	1212.9	1036.06	970.837	982.912	988.934	833	928	1241	1309	1290	1048	945	932	938
Ell	NM_007924	13716	chr8	elongation factor RNA polymerase II	9291	3.72956	-0.527703	0.261319	0.390679	0.000553557	0.0738842	0.00720041	0.0297329	0.372705	0.0802433	2.39748	2.45904	4.04463	4.33846	4.82888	4.41659	3.84905	3.50237	3.52529	-0.531103	-0.521629	0.20033	0.319416	0.482842	0.29038	315.632	317.719	524.701	569.936	638.416	558.56	483.877	440.838	444.919	317	316	549	579	679	565	471	418	422
Ell2	NM_138953	192657	chr13	elongation factor RNA polymerase II 2	3965	16.3303	0.153579	0.108921	0.646402	0.228696	0.39366	2.97906e-07	0.744667	0.749302	2.00446e-05	14.604	15.5133	15.478	13.696	17.3642	25.5495	13.6038	14.8335	13.6167	0.123172	0.183206	0.185767	0.0274915	0.378895	0.871895	2274.15	2370.82	2375.04	2128.15	2715.38	3821.95	2022.83	2208.38	2032.69	2284	2358	2485	2162	2888	3866	1969	2094	1928
Elmsan1	NA	NA	NA	NA	7435	3.13718	0.0906221	0.535987	0.811649	0.640121	0.00511519	2.02776e-05	0.941295	0.0770356	0.000815993	2.62952	2.42871	3.5104	3.37459	5.37444	2.98186	2.31866	2.47922	2.58466	0.159443	0.0179509	0.554595	0.515831	1.19589	0.282746	768.67	696.769	1011.18	984.345	1577.72	837.345	647.227	692.891	724.304	772	693	1058	1000	1678	847	630	657	687
Elovl2	NM_019423	54326	chr13	elongation of very long chain fatty acids (FEN1/Elo2, SUR4/Elo3, yeast)-like 2	8444	3.92713	-0.0125502	-0.547033	-0.36825	0.949828	0.00717247	0.0682189	0.992073	0.0951893	0.325242	4.12276	4.82388	3.03277	3.13273	2.45872	4.6383	4.04084	5.16707	4.80233	-0.11567	0.0835604	-0.579074	-0.514291	-0.853926	-0.00378787	675.075	775.192	489.339	511.859	404.282	729.592	631.818	808.895	753.825	678	771	512	520	430	738	615	767	715
Eltd1	NM_133222	170757	chr3	EGF, latrophilin seven transmembrane domain containing 1	9475	2.60731	-0.359118	0.5338	0.122955	0.022287	0.00038038	0.420996	0.281739	0.0121002	0.744534	1.74449	2.00544	3.55921	3.39477	2.60755	2.67231	2.65248	2.22227	2.5922	-0.447399	-0.273901	0.55775	0.50771	0.136986	0.108421	305.675	344.865	614.544	593.559	458.829	449.814	443.811	372.29	435.427	307	343	643	603	488	455	432	353	413
Emid1	NM_080595	140703	chr11	EMI domain containing 1	11067	2.76304	0.211556	-0.740788	-0.50113	0.346057	0.00163123	0.0307054	0.837092	0.0343684	0.209416	3.47964	3.85666	2.12889	1.65719	1.65323	2.88981	3.19259	3.24632	3.39843	0.149119	0.270049	-0.577606	-0.918637	-0.913075	-0.1755	283.77	308.669	171.079	134.853	135.377	226.392	248.619	253.114	265.686	285	307	179	137	144	229	242	240	252
Eml6	NM_146016	237711	chr11	echinoderm microtubule associated protein like 6	9226	1.40818	0.102894	-0.526409	-0.397623	0.528514	0.00171984	0.0171188	0.911962	0.0353882	0.144544	1.73834	1.69355	1.05764	1.15866	1.01281	1.44453	1.55072	1.60915	1.80527	0.134564	0.0699334	-0.601944	-0.452596	-0.637045	-0.189882	599.403	573.1	359.356	398.66	350.695	478.485	510.591	530.48	596.732	602	570	376	405	373	484	497	503	566
Emp1	NM_010128	13730	chr6	epithelial membrane protein 1	8170	6.39177	-0.0816791	0.607386	1.20504	0.734426	0.010144	2.76315e-07	0.957774	0.119993	1.90004e-05	2.76964	5.51423	6.01403	7.28055	11.8125	8.42841	3.92849	5.38636	4.26208	-0.642701	0.321498	0.452308	0.74577	1.4525	0.901968	321.606	628.397	688.132	843.585	1377.44	940.16	435.597	597.967	474.44	323	625	720	857	1465	951	424	567	450
Emp2	NM_007929	13731	chr16	epithelial membrane protein 2	3941	16.6793	-0.0804996	-0.423882	-0.268561	0.431651	4.32003e-05	0.00912379	0.871384	0.0024029	0.0962768	17.6753	18.026	14.3041	13.8091	14.2863	17.3855	19.8536	18.0942	20.692	-0.0810981	-0.0798292	-0.407489	-0.440167	-0.381988	-0.162862	2594.76	2597.04	2069.19	2022.83	2106.11	2451.74	2783.06	2539.54	2911.97	2606	2583	2165	2055	2240	2480	2709	2408	2762
Emr1	NM_010130	13733	chr17	EGF-like module containing, mucin-like, hormone receptor-like sequence 1	11184	1.56144	-0.332607	-1.0534	-0.836253	0.334371	0.00305906	0.0174789	0.831182	0.0530251	0.146423	1.15042	2.13804	0.910522	1.07566	0.669348	1.68696	2.14428	2.71632	1.55661	-0.826433	0.0365598	-1.18258	-0.925827	-1.59562	-0.334694	159.309	290.571	124.241	148.636	93.0609	224.416	283.548	359.619	206.657	160	289	130	151	99	227	276	341	196
Eng	NM_007932	13805	chr2	endoglin	9500	2.98877	-0.560027	-0.566027	0.224075	0.00136874	0.00119833	0.183557	0.0536984	0.02767	0.528609	2.39067	2.06329	2.44333	1.9932	4.08453	3.64566	3.62777	3.66168	2.92201	-0.444355	-0.683184	-0.434182	-0.709009	0.33283	0.105204	364.421	308.67	367.007	303.176	625.253	533.845	528.053	533.64	427	366	307	384	308	665	540	514	506	405
Enox2	NM_145951	209224	chrX	ecto-NOX disulfide-thiol exchanger 2	8455	3.81894	-0.123372	-0.411073	-0.523726	0.481666	0.0203934	0.00328543	0.889872	0.184277	0.0465653	4.23575	3.92244	4.04589	2.64032	2.71066	3.54495	5.11083	4.34073	4.36021	-0.055922	-0.193663	-0.143178	-0.739725	-0.692727	-0.370232	716.895	651.524	674.762	445.905	460.704	576.356	825.98	702.385	707.439	720	648	706	453	490	583	804	666	671
Enpp2	NM_015744	18606	chr15	ectonucleotide pyrophosphatase/phosphodiesterase 2	7199	6.37655	-0.0403095	-0.111547	-0.441552	0.740445	0.360246	0.000361514	0.959619	0.722512	0.00848846	6.40703	7.05402	6.42761	6.36735	5.4415	4.81489	6.78041	7.71956	6.99676	-0.0972102	0.0143907	-0.113802	-0.109275	-0.326524	-0.566741	966.812	1044.65	955.745	958.752	824.583	697.953	977.002	1113.68	1012.13	971	1039	1000	974	877	706	951	1056	960
Entpd2	NM_009849	12496	chr2	ectonucleoside triphosphate diphosphohydrolase 2	7650	10.1886	0.0159017	-0.525544	-0.153464	0.914528	0.000521442	0.302995	0.985159	0.0153911	0.649914	10.7204	11.613	7.19271	8.12698	8.58561	11.5037	13.2107	10.5557	10.5374	-0.0287062	0.0595007	-0.624866	-0.43086	-0.342614	0.0150348	886.161	942.095	585.868	670.339	712.685	913.471	1042.75	834.213	835.01	890	937	613	681	758	924	1015	791	792
Epas1	NM_010137	13819	chr17	endothelial PAS domain protein 1	1454	28.5789	0.0488011	-0.52943	-0.350342	0.57572	2.52722e-09	7.19466e-05	0.926362	8.10978e-07	0.00227952	32.3691	34.5882	23.9298	20.8787	24.5674	26.6657	32.5923	33.0403	34.8964	0.0140924	0.0826688	-0.442871	-0.6215	-0.377636	-0.323437	7392.98	7752.93	5385.65	4758.33	5634.81	5850.56	7108.16	7214.67	7640.48	7425	7711	5635	4834	5993	5918	6919	6841	7247
Epb4.1	NM_183428	269587	chr4	erythrocyte protein band 4.1	4622	9.63982	0.356173	0.149154	0.15718	0.00118753	0.177005	0.154658	0.0486504	0.551597	0.487173	11.1764	10.3259	8.52976	10.0801	9.45859	9.43707	8.76792	9.34282	7.99872	0.424872	0.283674	0.0139556	0.272874	0.190297	0.123018	2409.56	2184.82	1812.09	2168.51	2047.82	1954.47	1805.04	1925.74	1653.14	2420	2173	1896	2203	2178	1977	1757	1826	1568
Epb4.1l4b	NM_019427	54357	chr4	erythrocyte protein band 4.1-like 4b	6402	9.73014	0.048127	0.640459	0.59195	0.712912	5.93558e-07	4.01989e-06	0.954508	7.50342e-05	0.00020962	7.63833	8.08589	10.9119	12.7582	11.9981	11.0901	6.78297	8.5756	8.26318	0.0201289	0.075146	0.513036	0.756517	0.677137	0.499707	966.812	1004.43	1360.98	1611.37	1525.05	1348.46	819.821	1037.75	1002.64	971	999	1424	1637	1622	1364	798	984	951
Epc2	NM_172663	227867	chr2	enhancer of polycomb homolog 2 (Drosophila)	6358	6.67982	0.279591	0.445417	0.359757	0.0535234	0.00199017	0.0127046	0.435931	0.0391601	0.120727	6.10334	7.22737	7.36914	7.55857	8.17077	5.97627	5.12548	5.90762	6.01411	0.166929	0.383545	0.417389	0.472087	0.593561	0.0787047	1135.08	1319.13	1350.47	1402.69	1526	1067.69	910.226	1050.41	1072.22	1140	1312	1413	1425	1623	1080	886	996	1017
Epha6	NM_007938	13840	chr16	Eph receptor A6	9054	3.02955	0.614355	0.0773691	-0.0882415	0.000660817	0.673156	0.632615	0.0337556	0.899496	0.862908	4.35292	3.66398	2.255	3.26466	2.54653	2.42127	3.09376	2.63826	2.41014	0.744626	0.469364	-0.223732	0.327082	-0.0214604	-0.157945	782.61	646.497	399.493	585.687	459.771	418.178	531.133	453.493	415.402	786	643	418	595	489	423	517	430	394
Ephb4	NM_010144	13846	chr5	Eph receptor B4	10654	1.47311	-0.817605	-0.206722	0.289275	0.000180367	0.326282	0.16048	0.0131238	0.696353	0.496998	0.742917	1.10229	1.52604	1.28541	2.15145	1.84176	1.50079	1.63419	1.90877	-1.10878	-0.569881	-0.0967672	-0.325337	0.424493	0.137028	137.404	200.082	278.122	237.225	399.598	327.226	265.058	288.972	338.428	138	199	291	241	425	331	258	274	321
Ephx2	NM_007940	13850	chr14	epoxide hydrolase 2, cytoplasmic	11000	2.69136	-0.0832029	-0.586999	-0.381628	0.675291	0.00402036	0.0582603	0.95125	0.0647553	0.297489	2.93224	3.00527	2.24268	1.94051	2.02488	2.86496	3.09412	3.42621	3.25147	-0.0872505	-0.0788667	-0.493427	-0.683044	-0.612941	-0.178313	254.896	256.387	192.104	168.321	176.752	239.243	256.838	284.75	270.959	256	255	201	171	188	242	250	270	257
Eps8	NM_007945	13860	chr6	epidermal growth factor receptor pathway substrate 8	10362	1.69438	-0.256874	0.529624	0.303745	0.196751	0.00576326	0.11629	0.720194	0.0830885	0.421891	1.12712	1.34677	1.74558	2.51126	1.74854	1.93267	1.54341	1.59973	1.44577	-0.374842	-0.146029	0.232667	0.774163	0.262342	0.342548	216.063	253.37	329.724	480.362	336.597	355.897	282.52	293.187	265.689	217	252	345	488	358	360	275	278	252
Erbb2	NM_001003817	13866	chr11	v-erb-b2 erythroblastic leukemia viral oncogene homolog 2, neuro/glioblastoma derived oncogene homolog (avian)	9779	1.89189	-0.533407	0.213574	0.523588	0.00718699	0.264557	0.00570317	0.152708	0.649258	0.0675901	1.08303	1.36893	2.1191	1.98877	2.96305	2.15678	1.6091	1.84634	2.05222	-0.695131	-0.385437	0.249013	0.175726	0.759008	0.237746	230.999	286.55	445.376	423.267	634.66	441.904	327.726	376.504	419.609	232	285	466	430	675	447	319	357	398
Erbb2ip	NM_021563	59079	chr13	Erbb2 interacting protein	5250	6.47071	0.0419631	0.593786	0.270513	0.758399	9.94061e-06	0.0457306	0.962844	0.000758578	0.260856	4.92922	6.27291	8.31209	8.07715	7.36872	5.81478	5.02509	5.96575	5.89381	-0.127228	0.193249	0.604953	0.581718	0.458542	0.0530571	1303.35	1627.8	2165.72	2131.11	1956.63	1476.97	1268.77	1508.11	1493.94	1309	1619	2266	2165	2081	1494	1235	1430	1417
Erbb3	NM_010153	13867	chr10	v-erb-b2 erythroblastic leukemia viral oncogene homolog 3 (avian)	6577	6.58746	-0.533363	-0.596649	0.0725235	1.86046e-05	1.75838e-06	0.549921	0.00240038	0.000189708	0.823828	4.9972	5.62547	5.41628	4.7382	7.2041	9.13625	8.04616	7.53603	8.28916	-0.606474	-0.46286	-0.511631	-0.686276	-0.0732261	0.205335	857.286	947.122	915.606	811.099	1241.1	1505.64	1318.08	1236.02	1363.21	861	942	958	824	1320	1523	1283	1172	1293
Ercc5	NM_011729	22592	chr1	excision repair cross-complementing rodent repair deficiency, complementation group 5	7063	5.95252	0.178026	0.484767	0.268491	0.179464	0.000218958	0.0419973	0.696862	0.0082538	0.249571	5.45187	5.87298	6.43299	7.5516	6.65852	5.46655	5.06104	5.12464	5.35994	0.137183	0.217363	0.35447	0.603676	0.431432	0.0831719	932.958	986.334	1084.77	1289.49	1144.26	898.64	827.01	838.429	879.286	937	981	1135	1310	1217	909	805	795	834
Erf	NM_010155	13875	chr7	Ets2 repressor factor	7126	6.75607	0.219211	0.287571	0.73213	0.105324	0.0330203	3.80987e-08	0.581715	0.241411	3.28831e-06	6.61392	5.74984	6.76066	6.20297	9.6828	8.08206	5.89429	5.06203	5.5545	0.328902	0.10009	0.339317	0.23334	0.884436	0.559952	988.717	843.563	995.888	925.284	1453.6	1160.62	841.391	723.478	795.998	993	839	1042	940	1546	1174	819	686	755
Ero1l	NM_015774	50527	chr14	ERO1-like (S. cerevisiae)	3845	13.8369	0.218524	0.349442	0.13985	0.0463051	0.00137878	0.202978	0.403557	0.0303259	0.552474	14.2642	14.003	14.106	16.8059	13.9693	13.002	11.5383	13.0063	13.2007	0.244979	0.191257	0.207664	0.47835	0.220927	0.0534349	2689.35	2591.01	2620.66	3161.72	2644.87	2354.85	2077.28	2344.43	2385.87	2701	2577	2742	3212	2813	2382	2022	2223	2263
Errfi1	NM_133753	74155	chr4	ERBB receptor feedback inhibitor 1	4312	17.5331	0.384021	0.413008	0.470619	0.0347675	0.0230769	0.00953988	0.3509	0.197949	0.0996147	15.9102	20.634	18.33	18.8727	24.5786	14.2711	13.0649	14.6031	15.7805	0.199454	0.547298	0.382394	0.442578	0.832741	-0.0152449	2049.12	2608.1	2326.29	2425.43	3178.93	1765.64	1606.76	1798.13	1948.34	2058	2594	2434	2464	3381	1786	1564	1705	1848
Esam	NM_027102	69524	chr9	endothelial cell-specific adhesion molecule	8765	7.48797	-0.125159	0.160613	0.46327	0.381065	0.253669	0.000856166	0.850546	0.639528	0.0167809	6.43074	5.90458	8.07862	6.95723	9.6445	9.05302	6.98942	6.84562	7.07532	-0.0520011	-0.201919	0.255347	0.0582005	0.537845	0.382724	508.796	458.48	629.837	549.263	766.287	688.067	528.054	517.825	536.641	511	456	659	558	815	696	514	491	509
Esyt2	NM_028731	52635	chr12	extended synaptotagmin-like protein 2	2467	17.7094	0.142139	0.0891273	0.267476	0.147103	0.363814	0.00617216	0.661752	0.724791	0.0715228	17.6052	18.0928	16.9035	17.4673	18.5266	20.786	15.0055	17.2885	17.953	0.135865	0.148195	0.0559695	0.121411	0.215522	0.31748	4162.97	4198.71	3938.64	4121.46	4399.34	4721.57	3388.17	3908.43	4069.58	4181	4176	4121	4187	4679	4776	3298	3706	3860
Ets2	NM_011809	23872	chr16	E26 avian leukemia oncogene 2, 3' domain	6227	8.58694	0.0301216	0.185932	0.776849	0.792788	0.102352	3.60072e-12	0.967398	0.436642	7.0411e-10	7.59796	6.63629	8.49425	7.36512	11.8707	12.2408	7.05422	7.43626	7.18207	0.136766	-0.085338	0.276295	0.0887917	0.786107	0.766387	1153.01	988.345	1270.19	1115.26	1809	1784.43	1022.2	1078.88	1044.81	1158	983	1329	1133	1924	1805	995	1023	991
Etv5	NM_023794	104156	chr16	ets variant gene 5	2246	28.5705	0.168969	0.0729094	0.454024	0.0819358	0.453919	2.50404e-06	0.523444	0.789396	0.00013928	29.9066	25.7718	25.065	27.0049	34.2012	34.2612	26.7346	25.6189	24.6453	0.284725	0.0430292	0.00877019	0.134403	0.484351	0.422863	4877.87	4125.31	4028.48	4395.11	5601.9	5368.12	4163.8	3994.91	3853.46	4899	4103	4215	4465	5958	5430	4053	3788	3655
Etv6	NM_007961	14011	chr6	ets variant gene 6 (TEL oncogene)	5613	6.68696	0.127822	0.315202	0.674442	0.346228	0.0194259	4.55097e-07	0.837092	0.179038	2.95106e-05	6.21481	5.40478	6.83074	6.39973	9.6527	7.42213	5.64851	5.92233	4.96321	0.237392	0.00900891	0.352417	0.276555	0.878345	0.435439	1466.65	1251.77	1588.45	1507.03	2287.59	1682.6	1272.87	1336.21	1122.83	1473	1245	1662	1531	2433	1702	1239	1267	1065
Evc	NM_021292	59056	chr5	Ellis van Creveld gene homolog (human)	10841	1.3608	-0.502955	-1.3491	-0.185708	0.0482078	4.16568e-07	0.459066	0.411261	5.60575e-05	0.767229	1.31485	1.2137	0.84334	0.562889	1.07358	2.13079	1.87094	1.87632	1.82288	-0.432171	-0.574118	-1.09063	-1.65137	-0.717388	0.204248	241.952	219.186	152.923	103.353	198.371	376.66	328.75	330.101	321.566	243	218	160	105	211	381	320	313	305
Exoc5	NM_207214	105504	chr14	exocyst complex component 5	2296	22.9201	0.151089	0.260826	0.127215	0.0857203	0.00291328	0.147982	0.534472	0.0514967	0.476816	21.9798	23.8367	24.3379	25.0311	22.8015	22.6195	20.6059	22.1482	21.324	0.105385	0.195297	0.231155	0.289781	0.164407	0.0888309	4370.07	4651.15	4768.23	4966.03	4552.6	4320.2	3912.11	4210.05	4064.32	4389	4626	4989	5045	4842	4370	3808	3992	3855
Exosc7	NM_001081188	66446	chr9	exosome component 7	9438	10.2833	-0.245108	-0.449261	-0.183115	0.107456	0.00347436	0.22683	0.585902	0.0582864	0.57743	9.74225	10.0472	9.18326	7.98024	9.37253	11.5112	12.7392	11.6905	12.0035	-0.253268	-0.235919	-0.359494	-0.543464	-0.302916	-0.0709024	431.132	436.36	400.457	352.394	416.514	489.359	538.327	494.624	509.23	433	434	419	358	443	495	524	469	483
Ext2	NM_010163	14043	chr2	exostoses (multiple) 2	4749	16.1897	0.192995	0.125733	0.541112	0.0542919	0.210636	4.80139e-08	0.438555	0.59316	3.99409e-06	16.3104	15.0011	14.1783	15.6844	19.4027	20.8395	14.1817	13.9193	14.47	0.264833	0.117109	0.0416136	0.20529	0.521257	0.560281	1998.34	1803.75	1711.74	1917.51	2387.24	2452.73	1659.15	1630.45	1699.53	2007	1794	1791	1948	2539	2481	1615	1546	1612
Extl2	NM_021388	58193	chr3	exostoses (multiple)-like 2	2357	34.0534	-0.0334119	0.0250721	-0.285939	0.736563	0.800295	0.004279	0.958878	0.951609	0.0558994	33.681	35.237	37.0274	34.6739	30.4257	27.8384	33.7149	39.8288	36.0132	-0.0526041	-0.0145333	0.0627986	-0.0138075	-0.19313	-0.385326	4329.25	4445.04	4689.86	4447.27	3927.35	3437.38	4138.12	4894.5	4437.54	4348	4421	4907	4518	4177	3477	4028	4641	4209
F13a1	NM_028784	74145	chr13	coagulation factor XIII, A1 subunit	10138	2.13778	-0.320102	-0.280904	0.570234	0.112036	0.16174	0.00329339	0.591783	0.531581	0.0466253	1.56192	1.73791	1.61585	1.76938	2.41371	3.78562	1.89049	2.32733	2.17994	-0.38396	-0.257475	-0.35635	-0.207789	0.248019	0.832115	256.887	280.517	261.87	290.381	398.645	598.107	296.905	365.954	343.704	258	279	274	295	424	605	289	347	326
F3	NM_010171	14066	chr3	coagulation factor III	6783	13.896	0.0574017	1.11419	0.465017	0.700772	1.81673e-14	0.00158908	0.951497	2.20077e-11	0.0272056	9.91233	10.7109	20.8865	21.9577	16.1975	11.2607	9.75645	10.4856	10.5366	0.014365	0.0989692	1.06747	1.15769	0.728221	0.140262	793.562	841.551	1647.71	1754.1	1302.23	866.015	745.851	802.571	808.648	797	837	1724	1782	1385	876	726	761	767
Fabp4	NM_024406	11770	chr3	fatty acid binding protein 4, adipocyte	11632	6.36197	-0.123852	2.61244	0.435381	0.803282	6.42687e-08	0.371522	0.970419	1.21867e-05	0.707251	1.41957	3.40814	25.1746	6.99609	2.4986	4.70268	3.10711	3.58899	1.44738	-0.854046	0.361441	3.2387	1.41479	-0.0484163	0.791057	38.8302	91.4935	678.599	190.956	68.6196	123.577	81.159	93.852	37.9761	39	91	710	194	73	125	79	89	36
Fabp7	NM_021272	12140	chr10	fatty acid binding protein 7, brain	1098	264.309	0.556992	-1.33408	-0.0835431	0.054912	1.3837e-05	0.776059	0.440246	0.000931022	0.921282	396.673	382.848	117.846	92.3121	130.544	379.327	369.362	245.564	208.674	0.595549	0.517298	-1.17646	-1.51055	-1.00156	0.473101	12899.1	12218.1	3776.17	2995.36	4262.99	11849.4	11469.2	7634.41	6505.02	12955	12152	3951	3043	4534	11986	11164	7239	6170
Fads1	NM_146094	76267	chr19	fatty acid desaturase 1	1353	47.0443	-0.145671	-0.376498	0.0185134	0.209489	0.0012767	0.872696	0.730548	0.0287889	0.956626	43.9244	47.7289	39.9811	38.0297	42.2997	61.6623	52.6527	50.0756	54.7251	-0.192767	-0.100021	-0.349677	-0.403742	-0.241058	0.238591	6481.92	6912.38	5813.82	5599.94	6268.52	8741.24	7419.44	7064.91	7741.7	6510	6875	6083	5689	6667	8842	7222	6699	7343
Fads3	NM_021890	60527	chr19	fatty acid desaturase 3	3275	22.534	0.0506307	0.105404	0.426195	0.619487	0.300176	2.3832e-05	0.935886	0.674026	0.000946849	20.3913	21.4585	20.3016	23.1018	27.819	26.8965	20.6067	19.697	22.4524	0.0271711	0.073669	-0.000415063	0.204051	0.481229	0.368579	2844.68	2937.89	2790.78	3215.86	3897.26	3604.45	2745.05	2627.07	3002.64	2857	2922	2920	3267	4145	3646	2672	2491	2848
Fads6	NM_178035	328035	chr11	fatty acid desaturase domain family, member 6	9720	7.94185	0.155639	-0.533206	-0.0178201	0.406314	0.00577635	0.924684	0.859448	0.0830931	0.974191	10.489	7.67286	5.39309	5.87694	7.31325	8.99217	9.82797	7.96953	7.57126	0.374355	-0.10274	-0.604069	-0.462454	-0.138777	0.0948268	554.598	398.154	280.985	310.068	388.307	456.735	496.203	402.872	383.773	557	396	294	315	413	462	483	382	364
Fam107a	NM_183187	268709	chr14	family with sequence similarity 107, member A	5392	12.7899	-0.818639	1.9241	1.4886	0.0169641	5.17771e-09	5.73522e-06	0.243749	1.47271e-06	0.000280376	3.25044	3.84841	25.2365	22.2263	27.5573	7.40182	5.96593	6.83218	6.63958	-0.92958	-0.713486	2.00313	1.83805	2.15733	0.197921	436.11	506.74	3336.52	2975.68	3713	953.998	764.344	876.393	853.983	438	504	3491	3023	3949	965	744	831	810
Fam111a	NM_026640	107373	chr19	family with sequence similarity 111, member A	10144	2.57537	-0.405506	-0.739376	0.426594	0.0633383	0.00086439	0.0434171	0.469596	0.0220738	0.253217	1.94007	2.16128	1.49199	1.75592	2.65417	4.75674	2.84499	2.99778	2.59406	-0.469902	-0.34166	-0.868312	-0.616316	-0.0132104	0.762893	264.852	289.566	200.701	239.196	363.853	623.811	370.871	391.266	339.491	266	288	210	243	387	631	361	371	322
Fam114a1	NM_026667	68303	chr5	family with sequence similarity 114, member A1	5559	12.0842	-0.21002	-0.40224	-0.252859	0.0911639	0.00131416	0.0421503	0.544702	0.0294216	0.250005	11.4167	12.6343	10.0423	10.974	9.91715	13.7054	14.0117	13.9719	15.2146	-0.270657	-0.15162	-0.476803	-0.330786	-0.467592	-0.0651376	1436.78	1560.44	1245.34	1378.08	1253.32	1656.9	1683.81	1681.07	1835.53	1443	1552	1303	1400	1333	1676	1639	1594	1741
Fam117b	NM_001037725	72750	chr1	family with sequence similarity 117, member B	2209	19.9066	0.186379	0.331462	0.0686424	0.0817081	0.00188731	0.522544	0.52279	0.0376109	0.81128	19.1833	21.2651	22.1818	22.481	20.3896	17.1082	16.9697	19.6739	18.5532	0.124265	0.245802	0.312525	0.349968	0.218313	-0.0987877	4530.38	4928.65	5162	5297.75	4835.62	3881.26	3826.84	4442.07	4200.32	4550	4902	5401	5382	5143	3926	3725	4212	3984
Fam126a	NM_053090	84652	chr5	family with sequence similarity 126, member A	7242	3.92935	-0.648343	-0.0482967	-0.04267	9.85937e-06	0.735104	0.764941	0.00152333	0.926006	0.916724	2.61952	2.92911	4.62047	3.78239	3.60547	4.93667	4.10285	4.83836	4.56373	-0.716207	-0.582328	0.0803316	-0.190025	-0.249889	0.13906	631.265	692.746	1097.2	909.534	872.525	1142.83	944.128	1114.74	1054.3	634	689	1148	924	928	1156	919	1057	1000
Fam126b	NM_172513	213056	chr1	family with sequence similarity 126, member B	1762	15.0709	-0.0417866	0.0418017	-0.342752	0.655687	0.654702	0.000290839	0.946231	0.893457	0.00716506	14.9705	15.6603	15.8194	16.5972	11.935	13.1601	14.8163	17.6081	16.5506	-0.0608957	-0.0229929	-0.00256197	0.0847856	-0.381674	-0.304745	5554.94	5702.84	5784.19	6145.27	4447.29	4690.93	5249.7	6246.52	5887.19	5579	5672	6052	6243	4730	4745	5110	5923	5584
Fam129a	NM_022018	63913	chr1	family with sequence similarity 129, member A	7688	4.83715	0.00127621	-0.495629	-0.276372	0.993053	0.000921164	0.0619793	0.998957	0.0230107	0.307806	4.74457	6.19215	3.66972	4.06099	3.96018	5.1549	5.38267	5.532	6.03884	-0.188051	0.168639	-0.579335	-0.415299	-0.44235	-0.126406	797.545	1021.52	607.851	681.167	668.495	832.405	863.995	889.051	973.117	801	1016	636	692	711	842	841	843	923
Fam129b	NM_146119	227737	chr2	family with sequence similarity 129, member B	2402	27.905	-0.0271839	0.224545	0.61079	0.771222	0.0154818	3.07369e-11	0.965626	0.15638	5.06149e-09	23.5467	22.7846	26.5745	28.5366	36.1207	36.6073	26.1393	22.9301	24.292	0.00963773	-0.0648833	0.162885	0.283746	0.632882	0.588167	3710.93	3524.06	4126.92	4487.63	5716.61	5542.12	3933.68	3454.95	3670.01	3727	3505	4318	4559	6080	5606	3829	3276	3481
Fam13a	NM_153574	58909	chr6	family with sequence similarity 13, member A	6184	6.96366	-0.0512914	-0.301479	-0.61411	0.642772	0.0069344	6.0259e-08	0.941295	0.0939221	4.83424e-06	7.78817	7.67791	6.3901	6.60148	4.95216	5.62299	7.69892	8.97754	8.22427	-0.0277595	-0.0753733	-0.334199	-0.269183	-0.674344	-0.555209	1426.82	1380.47	1153.58	1206.81	911.078	989.593	1346.84	1572.44	1444.39	1433	1373	1207	1226	969	1001	1311	1491	1370
Fam13c	NM_024244	71721	chr10	family with sequence similarity 13, member C	7954	5.18865	-0.253013	-0.152736	-0.353434	0.0444996	0.222218	0.00515365	0.395907	0.606688	0.0631714	4.64845	5.15191	5.12607	5.36389	4.68887	4.5194	6.06611	5.94454	6.1248	-0.314506	-0.193398	-0.194811	-0.111371	-0.295967	-0.412921	671.093	729.948	729.232	772.711	679.785	626.774	836.256	820.501	847.658	674	726	763	785	723	634	814	778	804
Fam150b	NM_001159743	100294583	chr12	family with sequence similarity 150, member B	9268	8.02294	0.306774	1.26625	1.76308	0.2984	1.26524e-05	1.18234e-09	0.803005	0.000884609	1.3829e-07	6.30132	3.50464	10.9945	8.1297	15.0972	12.0497	5.68792	2.4185	4.24108	0.676615	-0.193891	1.45696	1.04025	1.94118	1.55231	405.245	221.198	696.742	521.7	975.022	744.417	349.289	148.722	261.469	407	220	729	530	1037	753	340	141	248
Fam160a2	NM_199009	74349	chr7	family with sequence similarity 160, member A2	4555	4.81316	0.201922	0.244301	0.311065	0.0410406	0.0132385	0.00156952	0.379719	0.140562	0.0269816	4.99662	4.55618	4.73271	5.09848	5.18409	5.21122	4.22669	4.49927	4.18307	0.279614	0.119486	0.180141	0.305605	0.338806	0.282334	2196.49	1965.63	2050.08	2236.43	2288.52	2200.63	1774.22	1890.94	1762.79	2206	1955	2145	2272	2434	2226	1727	1793	1672
Fam160b1	NM_145505	226252	chr19	family with sequence similarity 160, member B1	3645	11.6604	0.208665	0.334888	0.264049	0.0807758	0.00491577	0.0268296	0.520551	0.0745708	0.191779	12.2047	10.9544	12.0099	13.2496	13.421	10.7984	9.68581	10.9594	10.5054	0.297097	0.114162	0.252671	0.412458	0.440194	0.0626124	2932.3	2582.97	2843.35	3176.48	3238.16	2492.27	2222.14	2517.38	2419.61	2945	2569	2975	3227	3444	2521	2163	2387	2295
Fam167a	NM_177628	219148	chr14	family with sequence similarity 167, member A	8539	3.53648	-0.0524779	-0.0750146	0.558686	0.715044	0.601659	6.64043e-05	0.954819	0.867549	0.00212545	2.85382	3.3105	2.71019	3.34595	4.63662	4.85724	3.22056	3.35699	3.34693	-0.148779	0.0379586	-0.244337	0.0772259	0.556394	0.559431	515.765	587.175	482.646	603.404	841.503	843.279	555.793	580.046	579.867	518	584	505	613	895	853	541	550	550
Fam169a	NM_001146045	320557	chr13	family with sequence similarity 169, member A	3493	15.1351	0.247279	0.275395	0.0676607	0.0120265	0.0051006	0.494042	0.206793	0.0769084	0.79368	15.2862	16.9338	15.9865	16.8167	14.2431	14.434	12.9149	14.4653	14.7697	0.18561	0.306162	0.228988	0.320117	0.0897552	0.0449508	2949.22	3206.34	3039.28	3237.51	2759.58	2675.16	2379.32	2668.2	2731.68	2962	3189	3180	3289	2935	2706	2316	2530	2591
Fam178b	NM_201365	381337	chr1	family with sequence similarity 178, member B	9100	13.1798	-0.0116713	-1.14636	-0.594768	0.961892	7.45876e-06	0.0170833	0.994518	0.000606145	0.144457	17.0671	16.1548	9.56837	5.56826	7.49103	15.0555	19.138	15.395	17.5132	0.0404876	-0.0656738	-0.813822	-1.57405	-1.13873	-0.197993	659.145	612.312	364.146	214.583	290.513	558.564	705.782	568.45	648.396	662	609	381	218	309	565	687	539	615
Fam179a	NM_177087	320159	chr17	family with sequence similarity 179, member A	11426	1.27565	0.102872	0.0802038	0.928008	0.680879	0.748359	0.000124515	0.95125	0.93098	0.00354968	1.12563	1.00057	1.10299	0.989835	1.80378	2.0033	1.36742	0.811696	0.897548	0.197497	0.00175575	0.147234	0.0100822	0.880604	0.96765	168.271	146.795	162.475	147.65	270.78	287.683	195.189	116.021	128.634	169	146	170	150	288	291	190	110	122
Fam181b	NM_021427	58238	chr7	family with sequence similarity 181, member B	9729	5.12968	-1.00214	-0.672779	-0.15831	3.62882e-06	0.00153686	0.445766	0.00076974	0.0330125	0.758912	3.00199	3.66227	4.31857	4.0409	4.38319	7.75043	7.7056	6.17453	6.84159	-1.13468	-0.875936	-0.633073	-0.710591	-0.584536	0.172103	235.977	282.528	334.509	316.958	345.989	585.255	578.391	464.042	515.556	237	281	350	322	368	592	563	440	489
Fam196b	NM_001025382	574403	chr11	family with sequence similarity 196, member B	8352	2.91085	0.200339	-0.49834	-0.463955	0.202335	0.00204413	0.00402923	0.726375	0.0397241	0.0534738	3.7576	3.59811	2.39933	2.1304	1.84635	2.86008	3.40307	3.29186	3.25321	0.244196	0.154652	-0.423235	-0.576324	-0.773186	-0.206893	861.269	809.377	541.908	487.249	424.971	629.742	744.822	721.366	714.818	865	805	567	495	452	637	725	684	678
Fam198b	NM_133187	68659	chr3	family with sequence similarity 198, member B	5122	6.14919	-0.0448463	-0.740668	-0.603435	0.809338	9.947e-05	0.00143314	0.97234	0.0044941	0.0251553	6.31267	8.09644	4.37618	4.49971	3.38018	6.54648	7.80636	8.17551	7.08548	-0.22022	0.111573	-0.769657	-0.711423	-1.11462	-0.225694	1785.27	2247.15	1219.53	1269.81	959.959	1778.5	2108.1	2210.49	1920.93	1793	2235	1276	1290	1021	1799	2052	2096	1822
Fam19a5	NR_045510	106014	chr15	family with sequence similarity 19, member A5	5320	14.5404	0.052522	-0.344447	-0.160417	0.634458	0.00212275	0.149297	0.940107	0.0409972	0.478233	16.7134	15.431	12.8515	11.5536	13.0761	14.9459	17.2035	14.5479	16.4194	0.121877	-0.0202991	-0.278181	-0.413556	-0.225912	-0.0972043	1890.81	1713.27	1432.67	1304.26	1485.56	1624.28	1858.46	1573.5	1780.71	1899	1704	1499	1325	1580	1643	1809	1492	1689
Fam204a	NA	NA	NA	NA	7169	11.3098	0.0751719	-0.139963	-0.441715	0.572385	0.296814	0.00115573	0.924086	0.672073	0.0215237	11.6602	13.5429	10.2081	11.4614	8.90527	8.84033	11.5834	14.2772	11.2837	-0.0223633	0.166325	-0.23526	-0.0502555	-0.404718	-0.479205	1012.61	1154.24	873.549	993.205	776.628	737.498	960.565	1185.39	939.386	1017	1148	914	1009	826	746	935	1124	891
Fam210b	NA	NA	NA	NA	6159	8.75339	-0.125007	0.22816	1.18812	0.292405	0.0508723	1.97196e-25	0.797854	0.304625	9.87161e-23	5.87666	5.91346	7.38267	7.66257	12.9995	16.6299	6.95135	6.61099	6.41247	-0.115835	-0.133888	0.19177	0.263515	1.03475	1.32592	904.084	892.829	1119.18	1176.29	2008.33	2457.67	1021.18	972.366	945.709	908	888	1171	1195	2136	2486	994	922	897
Fam214b	NA	NA	NA	NA	4129	18.3909	0.0114492	0.0753036	0.593521	0.905631	0.434117	3.84564e-10	0.984056	0.776916	5.12325e-08	17.0391	15.0296	16.9165	16.5953	23.5263	24.948	16.654	16.4186	16.3862	0.11167	-0.0963488	0.0800294	0.0704991	0.58299	0.603608	2232.33	1932.45	2183.88	2169.5	3095.24	3139.81	2083.44	2056.52	2057.99	2242	1922	2285	2204	3292	3176	2028	1950	1952
Fam220a	NA	NA	NA	NA	4547	22.5156	0.0568035	0.113358	0.30111	0.548029	0.229199	0.00130497	0.918772	0.615541	0.0233978	21.0284	21.4182	23.214	20.8969	24.2755	26.4742	21.4373	21.38	20.5773	0.0570812	0.0565012	0.178447	0.0449227	0.270216	0.331255	1972.46	1971.66	2145.65	1955.89	2286.64	2385.5	1920.1	1917.31	1850.29	1981	1961	2245	1987	2432	2413	1869	1818	1755
Fam222a	NA	NA	NA	NA	10325	2.91514	0.323826	0.341778	0.827082	0.190492	0.16643	0.000692855	0.715859	0.53835	0.0140993	3.19698	2.22863	3.38431	2.12018	4.66006	3.07151	2.49019	2.16927	2.08621	0.570063	0.0242412	0.630836	-0.0235976	1.11855	0.454665	367.409	251.36	383.26	243.13	537.819	339.088	273.272	238.351	229.844	369	250	401	247	572	343	266	226	218
Fam43a	NM_177632	224093	chr16	family with sequence similarity 43, member A	10329	2.51782	-0.259169	0.748106	0.240046	0.165224	2.64003e-05	0.186022	0.680882	0.00158846	0.531402	1.79068	1.74879	3.54779	3.56324	2.81114	2.2194	2.41041	2.05109	2.12038	-0.227935	-0.288894	0.734256	0.758599	0.426569	0.0227931	234.982	225.218	458.756	466.579	370.453	279.773	302.038	257.335	266.743	236	224	480	474	394	283	294	244	253
Fam46a	NM_001160379	212943	chr9	family with sequence similarity 46, member A	10729	1.14013	-1.34608	-0.121796	-0.0892519	1.19859e-10	0.528071	0.643156	9.37519e-08	0.829825	0.867454	0.479481	0.612283	1.18436	1.36151	1.45326	1.16816	1.42014	1.44184	1.44698	-1.51038	-1.18732	-0.234643	-0.0161421	0.0868266	-0.291001	111.516	139.756	271.426	315.975	339.425	260.99	315.395	320.609	322.619	112	139	284	321	361	264	307	304	306
Fam53c	NM_175104	66306	chr18	family with sequence similarity 53, member C	2034	26.8726	0.0644639	0.0715175	0.692318	0.497261	0.45113	1.41489e-13	0.898705	0.788137	3.40525e-11	23.8637	23.0948	24.0942	23.0643	32.765	40.6	23.7236	23.7751	22.2815	0.101131	0.026817	0.0937727	0.0488732	0.56446	0.809723	4557.26	4328.41	4534.07	4395.1	6283.56	7448.15	4326.12	4340.82	4079.08	4577	4305	4744	4465	6683	7534	4211	4116	3869
Fam81a	NM_029784	76886	chr9	family with sequence similarity 81, member A	4796	15.5176	0.0158331	-0.0884114	-0.405343	0.865707	0.346543	2.07247e-05	0.982172	0.709785	0.000831312	16.9223	16.6374	15.9798	15.2182	12.5794	12.6976	17.0171	17.0891	17.467	0.0413424	-0.0102098	-0.0625153	-0.114819	-0.380208	-0.43071	2081.98	2008.86	1937.3	1868.29	1554.2	1500.7	1999.2	2010.11	2060.1	2091	1998	2027	1898	1653	1518	1946	1906	1954
Farp1	NM_134082	223254	chr14	FERM, RhoGEF (Arhgef) and pleckstrin domain protein 1 (chondrocyte-derived)	7617	4.17247	0.222997	0.433324	0.400386	0.11444	0.00198514	0.00430128	0.596376	0.0391601	0.0559945	4.03997	3.9344	4.15534	5.05914	5.00047	4.07136	3.64382	3.47525	3.49667	0.254989	0.189791	0.274348	0.576083	0.568457	0.208262	837.373	800.328	848.698	1046.36	1040.84	810.654	721.193	688.673	694.786	841	796	888	1063	1107	820	702	653	659
Fas	NM_007987	14102	chr19	Fas (TNF receptor superfamily member 6)	12147	1.49899	-0.330039	0.900583	1.08539	0.359058	0.00772476	0.00123835	0.843424	0.100448	0.0225261	0.706551	0.920852	1.68242	2.13115	2.81998	1.52547	0.831314	1.3742	0.971197	-0.510111	-0.161881	0.702065	1.05838	1.46906	0.525892	44.8052	57.3099	105.125	134.856	179.595	92.9253	50.3462	83.3069	59.0485	45	57	110	137	191	94	49	79	56
Fasn	NM_007988	14104	chr11	fatty acid synthase	716	26.8905	0.271916	-0.0830444	0.447733	0.0142069	0.457649	5.10444e-05	0.223072	0.790555	0.00172514	32.1219	24.6711	21.3398	23.0694	30.0198	34.8627	26.218	22.8212	24.1299	0.461425	0.053646	-0.149755	-0.0192175	0.369872	0.521602	13623	10268.5	8918.09	9762.75	12785.3	14203.3	10617.5	9253.25	9810.23	13682	10213	9331	9918	13598	14367	10335	8774	9305
Fat1	NM_001081286	14107	chr8	FAT tumor suppressor homolog 1 (Drosophila)	6562	1.81818	-0.0568679	-0.47504	-0.160677	0.636804	0.000106189	0.183563	0.940831	0.00472937	0.528609	1.90617	1.99742	1.57404	1.34489	1.64844	2.02294	1.9804	2.07116	2.25524	-0.0772086	-0.0368641	-0.374369	-0.583009	-0.280531	-0.0494058	1189.85	1223.62	968.173	837.676	1033.31	1213.02	1180.42	1236.02	1349.5	1195	1217	1013	851	1099	1227	1149	1172	1280
Fbf1	NM_172571	217335	chr11	Fas (TNFRSF6) binding factor 1	8025	3.20765	-0.184703	-0.514371	-0.116395	0.225178	0.000866021	0.442952	0.742296	0.0220738	0.757376	3.26551	3.10082	2.58033	2.48239	2.77258	3.99005	4.06339	3.4061	3.77482	-0.134523	-0.23612	-0.494968	-0.532602	-0.364214	0.0963447	748.756	697.774	583.004	567.966	638.406	878.87	889.676	746.68	829.735	752	694	610	577	679	889	866	708	787
Fbln2	NM_007992	14115	chr6	fibulin 2	2877	19.3904	0.054627	-0.288002	0.0849932	0.604026	0.00682561	0.419118	0.932567	0.0928	0.743458	20.7544	20.0315	15.4892	16.6439	18.7318	23.3868	21.3909	18.6951	20.9333	0.0932065	0.0149994	-0.350042	-0.228235	-0.0486077	0.207506	3840.37	3637.67	2824.23	3073.13	3480.73	4157.08	3779.58	3307.3	3713.23	3857	3618	2955	3122	3702	4205	3679	3136	3522
Fbln5	NM_011812	23876	chr12	fibulin 5	2256	18.267	-0.00888784	0.0923539	0.321302	0.939838	0.431522	0.00593389	0.99025	0.774637	0.0693395	16.8308	16.5721	16.8503	18.9384	17.5094	25.0116	17.3563	17.0673	17.7946	0.0156019	-0.0338101	-0.00395489	0.182661	0.0786875	0.529043	4232.67	4090.12	4175.66	4752.42	4421.9	6042.35	4167.91	4103.54	4289.93	4251	4068	4369	4828	4703	6112	4057	3891	4069
Fbn1	NM_007993	14118	chr2	fibrillin 1	9552	1.0739	-0.0794507	0.492422	0.237867	0.643856	0.00329553	0.159608	0.941295	0.0562667	0.49543	0.787157	0.977245	1.42567	1.19316	1.14796	1.06449	0.898933	1.09662	0.898094	-0.228407	0.0558104	0.605375	0.367071	0.320645	0.148081	332.559	405.191	593.519	502.999	487.038	432.019	362.654	442.94	363.74	334	403	621	511	518	437	353	420	345
Fbrs	NM_010183	14123	chr7	fibrosin	7850	7.11319	0.209069	0.151393	0.389593	0.141112	0.287142	0.00572263	0.653286	0.66623	0.0677565	7.15805	6.97555	6.84414	6.72544	8.79246	7.32561	7.17321	5.91109	5.91283	0.240774	0.176519	0.15495	0.14784	0.543219	0.216236	809.493	774.187	762.684	758.93	998.527	795.825	774.613	639.108	641.019	813	770	798	771	1062	805	754	606	608
Fbxl3	NM_015822	50789	chr14	F-box and leucine-rich repeat protein 3	2390	23.9793	0.0599171	0.386938	0.055102	0.622119	0.00133744	0.650304	0.93656	0.0296774	0.871738	20.8422	24.536	29.3748	27.4638	25.6598	19.7775	20.8711	23.3088	23.3961	-0.0479974	0.160264	0.425737	0.34682	0.258016	-0.181555	3792.57	4381.7	5267.13	4986.7	4688.94	3457.15	3626.51	4055.02	4081.18	3809	4358	5511	5066	4987	3497	3530	3845	3871
Fbxo30	NM_027968	71865	chr10	F-box protein 30	5529	7.32398	-0.569815	0.0807298	0.195566	1.95805e-08	0.411609	0.0457258	8.75178e-06	0.762137	0.260856	5.06298	5.05989	8.01897	7.85859	8.50347	8.85732	7.48171	7.74893	8.11408	-0.555603	-0.583534	0.0861139	0.0750929	0.197994	0.19279	1075.34	1054.7	1678.29	1665.51	1813.7	1807.17	1517.38	1573.5	1652.08	1080	1049	1756	1692	1929	1828	1477	1492	1567
Fbxo32	NM_026346	67731	chr15	F-box protein 32	7575	2.94014	-0.0128425	0.631386	0.158236	0.93929	0.000134612	0.344701	0.99025	0.0056723	0.687274	2.46573	2.49897	3.6471	4.10262	3.4099	2.19736	2.47892	2.72054	2.58234	-0.0090191	-0.0167627	0.533862	0.721615	0.464235	-0.232881	729.838	725.926	1063.74	1211.73	1013.58	624.795	700.648	769.876	732.74	733	722	1113	1231	1078	632	682	730	695
Fbxo34	NR_027414	78938	chr14	F-box protein 34	6023	11.0753	0.275932	0.176657	0.494756	0.0140068	0.116674	8.9262e-06	0.222739	0.462606	0.000404751	11.4481	10.7684	10.3337	10.3924	13.2309	12.8397	10.4781	9.11072	8.92592	0.332357	0.217061	0.163503	0.189767	0.547102	0.439841	1438.77	1328.18	1279.74	1303.27	1669.85	1550.13	1257.46	1094.7	1075.39	1445	1321	1339	1324	1776	1568	1224	1038	1020
Fbxo46	NM_175530	243867	chr7	F-box protein 46	11347	1.4827	-0.956511	-0.336121	-0.320172	8.08435e-06	0.101224	0.118046	0.0012647	0.435111	0.424335	0.929495	1.02932	1.59603	1.41256	1.39994	1.67717	1.9321	1.88499	2.08816	-1.01233	-0.893195	-0.258591	-0.415818	-0.419599	-0.22393	117.491	127.691	198.794	178.165	177.696	203.652	233.209	227.805	253.033	118	127	208	181	189	206	227	216	240
Fbxw11	NM_134015	103583	chr11	F-box and WD-40 domain protein 11	760	60.3727	0.0840779	0.0824811	0.238771	0.289101	0.298262	0.00250578	0.794615	0.673515	0.038058	60.5362	57.038	58.4274	58.9389	63.8247	68.2975	55.9878	59.9314	56.4537	0.139419	0.0264769	0.0670429	0.0977318	0.22181	0.255494	10940.6	10116.7	10405.2	10629	11583.7	11857.3	9662.12	10355.3	9780.71	10988	10062	10887	10798	12320	11994	9405	9819	9277
Fcer1g	NM_010185	14127	chr1	Fc receptor, IgE, high affinity I, gamma polypeptide	11162	7.99081	-0.685805	-1.12481	-0.0552198	0.025309	0.00033299	0.853125	0.299378	0.0109743	0.949054	4.39689	7.7347	4.59396	4.32107	8.6692	10.2619	9.88512	14.0636	6.30577	-1.12674	-0.343836	-1.08507	-1.15473	-0.147028	0.0316214	123.464	213.152	127.112	121.073	244.452	276.809	265.056	377.541	169.76	124	212	133	123	260	280	258	358	161
Fcgr2b	NM_010187	14130	chr1	Fc receptor, IgG, low affinity IIb	11038	3.90968	-0.235124	0.373938	0.838199	0.304495	0.0918329	0.000121963	0.808664	0.414672	0.00349282	2.22525	3.21229	4.06031	4.21188	6.29304	5.20068	2.79921	3.2748	3.85195	-0.505295	-0.00588966	0.33631	0.407034	0.993618	0.655527	133.421	189.022	239.888	251.992	378.914	299.545	160.27	187.728	221.4	134	188	251	256	403	303	156	178	210
Fcgr3	NM_010188	14131	chr1	Fc receptor, IgG, low affinity III	10758	4.80789	-0.591119	-0.017517	0.623492	0.0174933	0.942202	0.00834243	0.24748	0.985183	0.090389	2.19006	3.69062	4.40114	4.3225	6.63219	7.11163	4.1925	5.92249	3.61904	-0.993765	-0.272424	-0.0137092	-0.02156	0.603207	0.639795	126.451	209.13	250.403	249.038	384.549	394.452	231.155	326.924	200.329	127	208	262	253	409	399	225	310	190
Fcgrt	NM_010189	14132	chr7	Fc receptor, IgG, alpha chain transporter	7523	11.5626	-0.342986	-0.455021	-0.429553	0.0186328	0.00187996	0.00330069	0.255091	0.0375842	0.0466331	10.1087	11.9067	9.67706	10.6536	8.67239	12.3074	13.7369	15.4379	14.1757	-0.450859	-0.24202	-0.534939	-0.378327	-0.66559	-0.22515	749.752	866.687	707.249	788.461	645.928	876.893	972.893	1094.7	1007.91	753	862	740	801	687	887	947	1038	956
Fcrls	NM_030707	80891	chr3	Fc receptor-like S, scavenger receptor	11578	1.93097	-0.249981	-1.4045	0.139574	0.481963	0.000193916	0.690391	0.889872	0.00753682	0.890481	1.76952	2.03774	0.76483	0.940428	1.16806	3.92435	2.55781	2.28498	2.18753	-0.339034	-0.163592	-1.55778	-1.24569	-0.927718	0.747069	150.348	169.919	64.0278	79.732	99.6388	320.312	207.523	185.619	178.183	151	169	67	81	106	324	202	176	169
Fgf18	NM_008005	14172	chr11	fibroblast growth factor 18	9050	7.79051	-0.0849964	-0.479746	-0.280484	0.579535	0.00213446	0.0696539	0.926875	0.0410376	0.328331	8.6409	7.98206	6.99765	5.64409	6.61653	8.06381	9.6867	8.69238	9.02405	-0.0159328	-0.157176	-0.340849	-0.632179	-0.394245	-0.173316	584.468	529.866	466.405	380.939	449.422	523.96	625.65	562.12	585.139	587	527	488	387	478	530	609	533	555
Fgf5	NM_010203	14176	chr5	fibroblast growth factor 5	11778	1.30916	0.176744	-0.216876	-0.726111	0.466638	0.380912	0.00451375	0.88587	0.739661	0.0575836	1.44427	1.8216	1.25258	1.2278	0.735998	1.03049	1.30887	1.65168	1.52323	0.0144818	0.320493	-0.210633	-0.221235	-0.943368	-0.526207	154.331	191.033	131.89	130.917	78.968	105.781	133.559	168.74	156.04	155	190	138	133	84	107	130	160	148
Fgf7	NM_008008	14178	chr2	fibroblast growth factor 7	11159	1.87852	-0.166058	-0.634029	-0.289819	0.461484	0.00604213	0.200752	0.882695	0.0852505	0.549819	1.58922	2.35396	1.66718	1.17656	1.7161	1.9314	2.34937	2.24436	2.26657	-0.458698	0.0785213	-0.411079	-0.892787	-0.342468	-0.236458	181.214	263.424	187.329	133.868	196.502	211.561	255.809	244.678	247.764	182	262	196	136	209	214	249	232	235
Fign	NM_021716	60344	chr2	fidgetin	8761	1.38132	-0.115475	-0.478532	-0.423998	0.464864	0.00286736	0.00806786	0.88477	0.0509008	0.088029	1.50143	1.48828	1.36242	0.961684	1.11509	1.3245	1.58876	1.70842	1.73499	-0.0956948	-0.135399	-0.256804	-0.740217	-0.518034	-0.334111	625.291	608.29	559.115	399.641	466.347	529.892	631.817	680.235	692.676	628	605	585	406	496	536	615	645	657
Fjx1	NM_010218	14221	chr2	four jointed box 1 (Drosophila)	10771	2.6484	0.243458	0.550435	0.272135	0.195524	0.00294039	0.146528	0.718869	0.0517566	0.474832	2.37453	2.6905	3.30572	2.95259	2.38652	2.83184	2.45149	2.19401	1.9963	0.164602	0.317172	0.619109	0.474692	0.177857	0.360012	245.934	273.479	337.377	305.145	248.213	281.752	242.452	217.257	198.216	247	272	353	310	264	285	236	206	188
Fkbp5	NM_010220	14229	chr17	FK506 binding protein 5	3344	18.905	0.0422937	0.891984	0.50104	0.777648	1.43346e-09	0.000720837	0.965981	5.27639e-07	0.0145505	14.9278	14.1543	23.2371	29.1033	23.9112	16.2301	15.2213	14.4551	14.2128	0.0932486	-0.0105472	0.710239	1.05303	0.77879	0.155937	2474.28	2302.45	3795.27	4813.45	3980.01	2584.21	2409.11	2290.64	2258.31	2485	2290	3971	4890	4233	2614	2345	2172	2142
Flna	NM_010227	192176	chrX	filamin, alpha	6502	3.2389	-0.428096	-0.61681	0.200749	0.01482	0.000489851	0.243278	0.227016	0.0147491	0.594148	2.41153	2.99475	2.91127	1.82851	3.51025	4.94467	3.56368	3.74652	3.97857	-0.577338	-0.292229	-0.327125	-0.979203	-0.0301704	0.399818	861.269	1049.68	1024.57	651.633	1258.96	1696.45	1215.34	1279.26	1362.15	865	1044	1072	662	1339	1716	1183	1213	1292
Flrt1	NM_201411	396184	chr19	fibronectin leucine rich transmembrane protein 1	10046	1.46261	0.0902823	-0.17514	-0.489563	0.601947	0.317062	0.00594761	0.932554	0.688332	0.0694351	1.82691	1.52346	1.26008	1.52608	1.12281	1.13954	1.7719	1.53012	1.59148	0.227154	-0.0612763	-0.32851	-0.034904	-0.467123	-0.509653	457.02	374.023	310.611	380.942	282.065	273.842	423.264	365.961	381.661	459	372	325	387	300	277	412	347	362
Flrt3	NM_178382	71436	chr2	fibronectin leucine rich transmembrane protein 3	5308	9.25269	0.385425	0.553874	2.52525	0.0194019	0.000735552	6.96445e-54	0.260797	0.0195444	2.179e-50	4.65404	5.33366	5.34512	5.85924	17.5634	27.0122	3.43961	4.81425	3.61833	0.297716	0.467104	0.476033	0.626508	2.21863	2.77551	901.096	1013.48	1019.78	1132	3414.91	5024.09	635.927	891.15	671.595	905	1008	1067	1150	3632	5082	619	845	637
Flt1	NM_010228	14254	chr5	FMS-like tyrosine kinase 1	9649	1.56196	-0.0559245	-0.764814	-0.328417	0.725779	3.82151e-06	0.0418311	0.954819	0.000359596	0.249214	1.86507	1.69729	1.12192	1.05641	1.30311	1.68193	1.8025	1.96747	1.9862	0.0230657	-0.139656	-0.72945	-0.797891	-0.486937	-0.183545	499.835	446.415	296.279	282.506	350.697	433.009	461.279	504.113	510.282	502	444	310	287	373	438	449	478	484
Fmn1	NM_010230	14260	chr2	formin 1	1317	14.7966	0.155165	0.0823539	0.393189	0.0729255	0.341982	4.859e-06	0.500822	0.706255	0.000246196	15.2853	13.8899	13.7792	13.9462	17.6101	17.0919	13.1294	13.6411	13.9514	0.235336	0.0701696	0.0644796	0.0999702	0.445646	0.338544	7516.44	6703.25	6676.86	6843.17	8696.21	8073.93	6165.06	6413.16	6576.7	7549	6667	6986	6952	9249	8167	6001	6081	6238
Fmo1	NM_010231	14261	chr1	flavin containing monooxygenase 1	6533	11.4294	-0.334302	-1.45234	-0.511015	0.218056	3.17016e-07	0.0612083	0.735376	4.50847e-05	0.305675	12.1876	12.5091	5.91163	5.456	5.65	16.6299	14.6214	18.4698	15.2789	-0.339361	-0.328876	-1.40308	-1.50049	-1.44106	0.0507795	1209.76	1218.59	578.226	540.404	563.175	1585.73	1385.88	1752.78	1453.88	1215	1212	605	549	599	1604	1349	1662	1379
Fmo2	NM_018881	55990	chr1	flavin containing monooxygenase 2	10503	1.99067	-1.17862	-0.13662	-0.594385	6.57622e-06	0.582213	0.0188845	0.00104179	0.858189	0.153268	0.958174	1.39608	2.20058	2.63311	1.78885	1.76383	1.79862	3.38607	3.08237	-1.4536	-0.940812	-0.281195	-0.00497808	-0.551762	-0.635759	136.408	195.055	308.7	374.051	255.739	241.218	244.516	460.864	420.664	137	194	323	380	272	244	238	437	399
Fndc3b	NM_173182	72007	chr3	fibronectin type III domain containing 3B	7138	3.4092	0.0078934	0.40657	0.339449	0.946488	0.000434139	0.0033773	0.991239	0.0134882	0.0471729	3.05436	2.85637	3.76541	4.02134	3.8965	3.59889	3.07664	3.0041	3.05508	0.0683379	-0.0552823	0.348758	0.461647	0.425374	0.246884	896.118	822.448	1088.59	1177.28	1148.02	1014.31	861.939	842.648	859.256	900	818	1139	1196	1221	1026	839	799	815
Fndc4	NM_022424	64339	chr5	fibronectin type III domain containing 4	5396	17.1079	0.00579883	-0.0971788	0.333109	0.96158	0.420901	0.00514225	0.994518	0.768429	0.0631436	16.5996	15.4616	16.4703	13.3808	18.1704	22.5112	17.3255	16.9441	15.3607	0.0690853	-0.0603621	0.0365986	-0.244795	0.205521	0.450427	1608.03	1469.95	1572.21	1293.43	1767.63	2094.85	1602.65	1569.28	1426.47	1615	1462	1645	1314	1880	2119	1560	1488	1353
Fndc5	NM_027402	384061	chr4	fibronectin type III domain containing 5	4967	15.6082	-0.239472	-0.601288	-0.556065	0.0665042	5.48044e-06	2.53414e-05	0.481934	0.000466263	0.000994193	17.9005	14.7754	14.0894	11.3527	11.4246	15.1457	20.1071	20.0706	19.8102	-0.0955314	-0.39924	-0.461949	-0.755207	-0.736924	-0.394403	2064.06	1672.04	1600.88	1306.22	1322.9	1677.66	2213.92	2212.6	2189.78	2073	1663	1675	1327	1407	1697	2155	2098	2077
Fnip1	NM_173753	216742	chr11	folliculin interacting protein 1	6711	4.19111	-0.0212498	0.633328	0.341058	0.900328	0.000144375	0.0419881	0.983412	0.00596321	0.249571	3.20577	3.61955	5.10575	5.61982	5.37578	3.42092	3.25522	3.92609	3.57378	-0.0971356	0.0507644	0.552476	0.708887	0.654076	-0.0614148	859.277	952.149	1348.56	1503.1	1447.02	880.844	833.176	1006.11	918.296	863	947	1411	1527	1539	891	811	954	871
Fnip2	NM_001162999	329679	chr3	folliculin interacting protein 2	9094	1.76335	-0.222304	0.822749	0.477583	0.259967	1.56725e-05	0.0128923	0.771513	0.00103232	0.121679	1.24963	1.14705	2.30964	2.63251	2.37797	1.52952	1.27565	1.58481	1.48562	-0.148867	-0.299101	0.714344	0.920967	0.783641	0.0841819	378.361	340.844	689.089	795.351	723.045	444.869	368.819	458.761	431.211	380	339	721	808	769	450	359	435	409
Fnta	NM_008033	14272	chr8	farnesyltransferase, CAAX box, alpha	1833	66.8377	-0.0966709	-0.253888	-0.19488	0.306526	0.00751849	0.0398042	0.809311	0.0988381	0.243832	65.2078	70.4632	61.3451	60.1678	56.8497	71.2435	73.5686	75.8562	75.8756	-0.139647	-0.0549145	-0.24895	-0.258787	-0.331419	-0.0698927	5234.33	5551.02	4852.34	4819.36	4582.68	5493.68	5639.06	5821.51	5838.69	5257	5521	5077	4896	4874	5557	5489	5520	5538
Fos	NM_010234	14281	chr12	FBJ osteosarcoma oncogene	7952	9.13601	3.0659	1.51485	2.04188	2.43789e-18	1.03758e-05	3.06353e-09	4.3586e-15	0.000772937	3.36316e-07	20.0561	17.621	6.75111	6.10464	14.4274	4.03074	1.99857	2.09852	2.89221	3.16307	2.94938	1.57262	1.44574	2.69427	0.793541	1792.24	1545.36	594.474	544.342	1294.72	346.006	170.543	179.294	247.754	1800	1537	622	553	1377	350	166	170	235
Fosl2	NM_008037	14284	chr5	fos-like antigen 2	5777	6.05874	0.10749	1.52147	1.82882	0.679474	2.75455e-09	9.79554e-13	0.95125	8.4081e-07	2.04319e-10	3.49799	2.70245	7.97787	8.54774	14.1712	6.29722	2.3392	2.93626	3.67472	0.292896	-0.105915	1.46023	1.57783	2.31611	1.08244	875.209	663.59	1966.93	2134.06	3560.68	1513.55	558.879	702.383	881.386	879	660	2058	2168	3787	1531	544	666	836
Foxd3	NM_010425	15221	chr4	forkhead box D3	8970	5.54963	0.328202	0.877234	0.221162	0.0901902	4.29908e-06	0.254694	0.544585	0.000398541	0.605296	5.29958	5.19995	7.23121	8.11445	6.08359	3.68895	4.74895	4.03037	4.21378	0.354617	0.300264	0.781049	0.965194	0.559407	-0.224681	536.675	516.795	721.585	819.96	618.681	358.86	459.221	390.217	409.073	539	514	755	833	658	363	447	370	388
Foxk1	NM_199068	17425	chr5	forkhead box K1	4942	5.9333	0.195426	0.272291	0.324261	0.0895221	0.0176542	0.0046493	0.544585	0.168529	0.0585373	6.33276	5.31657	5.88499	6.39833	6.80645	6.03046	5.30559	5.39125	5.12244	0.328166	0.0489	0.201203	0.339908	0.438261	0.199716	2012.28	1657.97	1842.68	2028.74	2171.94	1840.78	1609.84	1637.83	1560.36	2021	1649	1928	2061	2310	1862	1567	1553	1480
Foxo4	NM_018789	54601	chrX	forkhead box O4	8553	4.5882	-0.490079	-0.221058	-0.0482998	0.00118317	0.137698	0.743748	0.0486504	0.495767	0.908985	3.60825	3.72021	4.974	3.85266	5.30107	4.72088	5.51737	5.01117	5.46073	-0.497801	-0.480827	-0.0567017	-0.406547	0.0623077	-0.168602	486.891	492.665	661.379	518.748	718.336	611.945	710.92	646.49	706.382	489	490	692	527	764	619	692	613	670
Frat2	NM_177603	212398	chr19	frequently rearranged in advanced T-cell lymphomas 2	10169	3.8336	0.252933	0.629447	0.907412	0.185235	0.000800267	1.07112e-06	0.706226	0.0209326	6.26405e-05	3.22341	3.28326	4.13045	4.30812	5.95028	4.33786	2.57135	2.8641	3.04669	0.252147	0.251614	0.587603	0.666289	1.14037	0.621487	296.714	296.604	374.649	395.706	550.039	383.576	226.019	252.059	268.847	298	295	392	402	585	388	220	239	255
Frmd6	NM_028127	319710	chr12	FERM domain containing 6	6054	6.7599	-0.364156	0.340401	0.248753	0.00301518	0.00435492	0.0377172	0.0879602	0.0687287	0.236251	4.28402	5.58716	8.22928	7.82432	7.29913	7.91948	6.7813	6.15448	6.77729	-0.552517	-0.196815	0.367255	0.312607	0.221616	0.275237	852.307	1090.9	1613.3	1553.3	1458.29	1513.55	1288.28	1170.64	1292.57	856	1085	1688	1578	1551	1531	1254	1110	1226
Fryl	NM_028194	72313	chr5	furry homolog-like (Drosophila)	1688	11.7806	0.070281	-0.0174077	-0.224831	0.410924	0.838961	0.00911617	0.859698	0.960686	0.0962768	12.9414	12.3341	12.0655	11.7051	10.3329	10.4472	11.979	12.4399	12.9891	0.117636	0.0212323	-0.00467995	-0.0303051	-0.200971	-0.249122	6334.56	5925.04	5819.55	5717.08	5079.13	4912.38	5599	5821.51	6094.89	6362	5893	6089	5808	5402	4969	5450	5520	5781
Frzb	NM_011356	20378	chr2	frizzled-related protein	5304	12.9105	-0.137909	-0.33056	-0.543219	0.227413	0.00405935	2.87644e-06	0.743525	0.0652586	0.000157199	12.8325	15.0453	12.3681	11.9855	10.3613	10.8602	14.4013	15.4296	17.784	-0.242593	-0.04028	-0.316961	-0.344161	-0.544912	-0.541094	1599.07	1839.95	1518.68	1490.3	1296.58	1300.01	1713.6	1838.21	2124.41	1606	1830	1589	1514	1379	1315	1668	1743	2015
Fst	NM_008046	14313	chr13	follistatin	11287	2.14624	-0.213117	0.628693	2.1456	0.352716	0.00362259	1.58324e-25	0.841255	0.0599691	8.25595e-23	0.958435	0.91425	1.58522	1.77054	4.31848	5.40713	1.16507	1.05077	1.15789	-0.164952	-0.259091	0.533919	0.710524	2.00119	2.26098	95.5857	89.4845	155.781	176.197	432.498	518.029	110.954	100.196	110.704	96	89	163	179	460	524	108	95	105
Fstl3	NM_031380	83554	chr10	follistatin-like 3	11956	1.48438	-0.683061	1.10789	0.97029	0.0733126	0.00173558	0.00621072	0.500822	0.0354336	0.071903	0.692908	0.577736	2.50206	1.90562	2.89834	1.09896	0.955251	1.24413	0.976489	-0.539566	-0.823429	1.27383	0.901126	1.51228	0.0593512	57.7498	47.2564	205.487	158.477	242.598	87.9812	76.0274	99.1316	78.0257	58	47	215	161	258	89	74	94	74
Fxyd1	NM_194321	56188	chr7	FXYD domain-containing ion transport regulator 1	6509	45.2113	-0.245774	-0.695299	0.0764998	0.193462	0.000297193	0.682573	0.716485	0.0101451	0.886153	44.5077	40.5263	35.8923	26.3964	39.0281	68.9238	59.3246	47.0909	50.3095	-0.166762	-0.328888	-0.498047	-0.922729	-0.350074	0.405828	1151.01	1028.56	914.653	681.165	1013.55	1712.26	1464.98	1164.31	1247.24	1156	1023	957	692	1078	1732	1426	1104	1183
Fyb	NM_011815	23880	chr15	FYN binding protein	10320	1.59899	-0.806013	0.895	0.860671	0.0013929	0.000140882	0.00025356	0.0543058	0.00583821	0.00638492	0.550963	0.802307	2.51068	1.88277	2.44995	1.86282	1.18058	1.55186	0.938642	-1.08038	-0.568912	1.07696	0.680706	1.06896	0.610686	117.49	167.908	527.575	400.626	524.652	381.599	240.4	316.379	191.896	118	167	552	407	558	386	234	300	182
Fyco1	NM_148925	17281	chr9	FYVE and coiled-coil domain containing 1	9672	1.22223	-0.251723	-0.566984	-0.313659	0.159949	0.00181087	0.0804244	0.676959	0.0366005	0.350579	1.06254	1.38925	1.12082	0.846238	1.03502	1.33789	1.5065	1.47958	1.54324	-0.441676	-0.0828516	-0.386017	-0.772154	-0.473399	-0.167875	360.438	462.501	374.655	286.442	352.577	435.975	487.988	479.858	501.848	362	460	392	291	375	441	475	455	476
Fzd2	NM_020510	57265	chr11	frizzled homolog 2 (Drosophila)	10923	1.58435	-0.666246	-0.572567	-0.272692	0.00288202	0.00991307	0.212175	0.0856734	0.118493	0.56271	0.990384	1.49546	1.4158	1.22971	1.3667	1.93428	2.12639	2.11607	1.87532	-0.97315	-0.408736	-0.481534	-0.665817	-0.505109	-0.0697214	153.335	227.228	215.998	189.977	212.481	287.684	314.367	313.226	278.342	154	226	226	193	226	291	306	297	264
G0s2	NM_008059	14373	chr1	G0/G1 switch gene 2	10726	7.39346	-0.319542	-0.986352	-0.786049	0.144139	1.33346e-05	0.000445956	0.65764	0.000906972	0.00986066	7.19608	8.74268	5.60786	4.41479	4.37233	7.32329	11.0653	10.4254	9.38531	-0.450483	-0.19759	-0.829791	-1.15497	-1.1598	-0.483013	258.878	308.669	198.796	158.477	157.944	253.084	380.116	358.575	323.677	260	307	208	161	168	256	370	340	307
Gab2	NM_010248	14389	chr7	growth factor receptor bound protein 2-associated protein 2	3852	10.256	0.183334	0.445719	0.346038	0.203338	0.0018587	0.015898	0.727494	0.0372782	0.137217	9.8912	9.43808	10.7663	12.3929	12.9345	8.7944	8.44279	9.38784	8.62192	0.229802	0.135109	0.330837	0.551871	0.622759	0.00238894	2536.01	2374.84	2720.06	3170.58	3330.31	2166.03	2067.01	2301.19	2119.14	2547	2362	2846	3221	3542	2191	2012	2182	2010
Gabpb2	NM_172512	213054	chr3	GA repeat binding protein, beta 2	9529	1.18943	-0.515954	-0.32276	-0.211161	0.000789712	0.03345	0.161548	0.0374365	0.242864	0.498957	0.94273	1.01145	1.14333	1.08834	1.09358	1.34637	1.39593	1.49374	1.4507	-0.552535	-0.478308	-0.296115	-0.348979	-0.332927	-0.0974358	349.486	367.99	417.659	402.596	407.112	479.473	494.153	529.423	515.555	351	366	437	409	433	485	481	502	489
Gabrb2	NM_008070	14401	chr11	gamma-aminobutyric acid (GABA) A receptor, subunit beta 2	5782	4.50442	0.0900747	-0.048261	-0.301956	0.38514	0.64321	0.00414743	0.853473	0.886382	0.0546985	4.90921	4.94949	4.53236	4.41689	3.86386	3.70735	4.57682	5.0794	4.73317	0.0975689	0.0822876	-0.0388017	-0.0579029	-0.241561	-0.365138	1582.15	1565.47	1439.35	1420.41	1250.51	1147.77	1408.48	1565.06	1462.31	1589	1557	1506	1443	1330	1161	1371	1484	1387
Gadd45a	NM_007836	13197	chr6	growth arrest and DNA-damage-inducible 45 alpha	3871	52.6867	0.020553	0.571464	2.66187	0.900739	0.000432469	6.98205e-60	0.983412	0.0134882	2.91268e-56	22.0547	20.7509	38.0286	24.7212	113.409	156.986	20.4117	25.1308	20.0444	0.0767633	-0.0381225	0.841018	0.238177	2.44421	2.84922	1152.01	1063.75	1957.38	1288.51	5948.84	7877.2	1018.1	1255	1003.7	1157	1058	2048	1309	6327	7968	991	1190	952
Gadd45b	NM_008655	17873	chr10	growth arrest and DNA-damage-inducible 45 beta	10402	6.02308	0.0383229	0.979106	0.842261	0.896743	0.000677818	0.00352484	0.983169	0.0184411	0.0486903	3.88865	4.49416	7.64782	8.41742	10.4326	4.17162	4.62	4.51231	3.54204	-0.0549959	0.125903	0.896226	1.05233	1.37059	-0.0118351	210.089	238.289	407.144	453.783	566.037	216.5	238.343	233.073	183.459	211	237	426	461	602	219	232	221	174
Gadd45g	NM_011817	23882	chr13	growth arrest and DNA-damage-inducible 45 gamma	7319	21.4867	-0.549616	1.42114	1.94695	0.00087926	2.96256e-20	9.72501e-37	0.0397254	9.26911e-17	1.21708e-33	7.32362	6.84637	32.8083	22.7735	40.3448	40.3486	12.1619	9.28643	10.7858	-0.48759	-0.611499	1.65132	1.14313	1.97675	1.91289	337.538	309.675	1490.02	1047.34	1867.3	1786.41	535.243	409.203	476.546	339	308	1559	1064	1986	1807	521	388	452
Gak	NM_153569	231580	chr5	cyclin G associated kinase	1714	29.3152	0.201486	0.207638	0.3064	0.040847	0.0349951	0.00181683	0.379719	0.247857	0.0299573	30.7149	28.0552	27.5861	31.3841	33.5341	30.1507	26.5648	26.5318	26.3416	0.278149	0.120425	0.101952	0.306126	0.4109	0.193467	6101.57	5469.58	5399.98	6221.07	6689.75	5753.68	5039.1	5038.98	5016.34	6128	5440	5650	6320	7115	5820	4905	4778	4758
Gal	NM_010253	14419	chr19	galanin	8668	20.2986	-0.209569	-0.124053	0.958413	0.236284	0.481116	1.85592e-08	0.752343	0.804293	1.74638e-06	13.1513	16.8288	15.7698	15.9728	31.607	36.3628	18.7549	13.9414	21.089	-0.382276	-0.0543761	-0.142121	-0.105617	0.886687	1.02475	392.3	492.664	463.534	475.438	946.807	1041.99	534.217	397.606	603.054	394	490	485	483	1007	1054	520	377	572
Gal3st1	NM_016922	53897	chr11	galactose-3-O-sulfotransferase 1	9680	5.58272	-0.107853	-0.618431	-0.250548	0.606064	0.00380578	0.233201	0.933148	0.0623141	0.583956	6.4226	5.48413	5.02327	3.34	4.18497	6.76222	7.1558	6.28875	6.5054	0.0139623	-0.240429	-0.360893	-0.929702	-0.596381	0.0303225	479.921	402.176	369.878	249.036	314.023	485.406	510.588	449.276	466.004	482	400	387	253	334	491	497	426	442
Galnt11	NM_144908	231050	chr5	UDP-N-acetyl-alpha-D-galactosamine:polypeptide N-acetylgalactosaminyltransferase 11	5837	13.2302	0.139956	-0.347974	-0.396738	0.344775	0.0207644	0.00850467	0.836214	0.186285	0.0915185	16.4269	14.8424	11.8962	10.3981	8.80698	13.04	13.4934	16.9375	13.6819	0.223853	0.0505453	-0.262611	-0.438532	-0.668732	-0.166965	1781.28	1579.54	1271.14	1125.11	959.024	1358.34	1397.18	1755.94	1422.25	1789	1571	1330	1143	1020	1374	1360	1665	1349
Galnt15	NA	NA	NA	NA	12063	1.10138	-0.00947862	2.03881	1.74626	0.983492	2.77111e-06	6.01681e-05	0.998957	0.000279681	0.00196607	0.378732	0.543511	1.7864	2.02425	2.38048	0.721092	0.678464	0.298128	0.462366	-0.270126	0.21314	1.91698	2.11443	2.35652	0.583924	37.8352	53.2879	175.852	201.79	238.841	69.1973	64.7157	28.4935	44.2865	38	53	184	205	254	70	63	27	42
Galnt16	NA	NA	NA	NA	6287	7.78206	-0.186059	0.836038	0.902861	0.383925	6.18216e-05	1.49436e-05	0.852276	0.00310722	0.000623398	4.77947	4.96671	10.1522	9.62379	13.9082	6.83474	5.86539	6.12591	5.23317	-0.200096	-0.171769	0.864608	0.805641	1.34583	0.257498	799.536	815.41	1673.51	1606.45	2336.49	1098.34	936.934	979.745	839.228	803	811	1751	1632	2485	1111	912	929	796
Galnt3	NM_015736	14425	chr2	UDP-N-acetyl-alpha-D-galactosamine:polypeptide N-acetylgalactosaminyltransferase 3	11164	1.35981	-0.789064	-0.349295	0.272644	0.000681103	0.121847	0.213627	0.034371	0.467908	0.564396	0.72833	1.02309	1.2092	1.16082	1.51863	2.17981	1.40973	1.64888	1.63695	-1.03326	-0.573498	-0.327981	-0.368543	0.0263241	0.482171	114.503	157.853	187.324	182.103	239.747	329.206	211.636	247.838	246.708	115	157	196	185	255	333	206	235	234
Galnt9	NM_198306	231605	chr5	UDP-N-acetyl-alpha-D-galactosamine:polypeptide N-acetylgalactosaminyltransferase 9	5327	13.542	-0.086218	-0.111929	0.356651	0.443854	0.320279	0.00129078	0.875915	0.691561	0.0232433	13.3567	10.9031	12.4686	11.3701	16.5819	16.7081	13.8307	13.1166	13.1041	0.0648021	-0.254886	-0.0556228	-0.170481	0.382753	0.329687	1647.86	1320.14	1515.82	1399.74	2054.4	1980.17	1629.36	1547.13	1549.82	1655	1313	1586	1422	2185	2003	1586	1467	1470
Galr1	NM_008082	14427	chr18	galanin receptor 1	11315	1.61256	-0.0290456	-0.163726	-0.693479	0.900153	0.481679	0.00381258	0.983412	0.804293	0.0514719	1.44656	2.10718	1.51203	1.71498	0.955231	1.31034	2.10749	1.74666	1.76836	-0.30783	0.205346	-0.265471	-0.0666291	-0.896477	-0.507243	177.231	253.37	182.542	209.665	117.518	154.223	246.561	204.604	207.703	178	252	191	213	125	156	240	194	197
Gan	NM_001081151	209239	chr8	giant axonal neuropathy	8338	6.21881	0.582644	0.610596	1.08135	0.00305792	0.00188523	2.81919e-08	0.0889811	0.0376109	2.53829e-06	6.66877	5.29561	4.61931	7.56586	9.43111	7.59289	4.24934	4.32763	3.84822	0.750102	0.390942	0.199984	0.928853	1.25563	0.879214	754.731	588.182	515.137	854.414	1071.87	825.483	459.222	468.255	417.509	758	585	539	868	1140	835	447	444	396
Gars	NM_180678	353172	chr6	glycyl-tRNA synthetase	519	136.719	0.111704	0.199016	0.288434	0.167791	0.0137807	0.000348166	0.68359	0.143602	0.00823687	132.133	131.515	136.739	143.067	155.524	144.753	126.772	123.252	129.062	0.128515	0.0946766	0.15672	0.240102	0.369732	0.202164	13476.6	13164.2	13742.7	14560.4	15929.4	14182.5	12346.6	12018.5	12618.9	13535	13093	14379	14792	16942	14346	12018	11396	11969
Gas2	NM_008087	14453	chr7	growth arrest specific 2	7420	9.79218	-0.00392052	-0.104759	-0.421408	0.973424	0.374945	0.000441194	0.996716	0.734866	0.00981404	10.2957	10.8407	10.4866	9.20528	7.79236	8.17011	10.358	11.1887	11.3722	-0.0278394	0.0194419	-0.0225775	-0.192282	-0.423198	-0.418929	938.933	970.247	942.367	837.677	713.631	715.749	902.007	975.529	994.204	943	965	986	851	759	724	878	925	943
Gas7	NM_008088	14457	chr11	growth arrest specific 7	4321	7.56457	-0.255189	-0.693021	0.390846	0.248136	0.0020002	0.072352	0.762977	0.0391744	0.334471	6.6542	6.55488	5.48222	4.26797	6.33018	14.7044	8.78787	7.73482	7.97269	-0.230904	-0.279653	-0.531467	-0.87432	-0.296823	0.854672	1962.5	1897.26	1593.23	1256.02	1874.8	4165.98	2474.86	2180.96	2254.09	1971	1887	1667	1276	1994	4214	2409	2068	2138
Gatad2b	NM_139304	229542	chr3	GATA zinc finger domain containing 2B	8591	7.81542	0.389056	0.249393	0.43596	0.0109374	0.104306	0.00424067	0.196487	0.439725	0.0555147	8.64235	7.99806	6.42728	8.65939	8.79432	8.54033	6.64001	6.82159	6.28735	0.456095	0.317451	0.00837444	0.455827	0.487274	0.381123	702.955	638.453	515.14	702.824	718.334	667.307	515.726	530.478	490.254	706	635	539	714	764	675	502	503	465
Gatm	NM_025961	67092	chr2	glycine amidinotransferase (L-arginine:glycine amidinotransferase)	1107	80.7519	-0.019595	-0.281206	-0.524071	0.880435	0.0320895	7.39463e-05	0.983169	0.237774	0.0023287	77.4694	103.381	83.9982	66.6214	54.7144	74.1059	94.4258	91.2989	98.6901	-0.227239	0.161909	-0.131748	-0.447962	-0.722791	-0.349209	7792.25	10205.2	8325.53	6686.66	5526.68	7160.46	9069.34	8779.73	9516.08	7826	10150	8711	6793	5878	7243	8828	8325	9026
Gbp3	NM_018734	55932	chr3	guanylate binding protein 3	8501	5.81505	-0.384161	-1.01409	-0.378432	0.221284	0.00162854	0.228	0.738114	0.0343684	0.578318	3.38618	7.6778	4.08226	3.0395	6.13548	4.99852	6.16181	11.0389	5.15623	-1.07164	0.0802465	-0.823741	-1.23014	-0.209727	-0.56885	381.347	848.588	453.026	341.565	693.892	540.765	662.639	1188.54	556.685	383	844	474	347	738	547	645	1127	528
Gch1	NM_008102	14528	chr14	GTP cyclohydrolase 1	11031	2.00088	-0.134556	0.0377059	0.726604	0.506105	0.850435	0.000175977	0.901222	0.961395	0.00467591	1.44347	1.72842	1.69391	1.87336	2.62737	3.19328	1.62357	1.82363	1.95803	-0.254554	-0.0229728	-0.0461418	0.116503	0.611752	0.828532	170.262	200.082	196.879	220.493	311.208	361.829	182.871	205.655	221.403	171	199	206	224	331	366	178	195	210
Gcn1l1	NM_172719	231659	chr5	GCN1 general control of amino-acid synthesis 1-like 1 (yeast)	4824	5.35293	0.307696	0.213233	0.373868	0.0119295	0.0821055	0.00219749	0.206212	0.391958	0.0344631	6.08005	5.05923	4.82964	5.59911	5.71727	6.06129	5.23629	4.24059	4.51738	0.446282	0.154184	0.0930592	0.324342	0.363641	0.383903	2217.4	1810.79	1735.63	2037.6	2093.89	2123.52	1823.53	1478.59	1579.34	2227	1801	1816	2070	2227	2148	1775	1402	1498
Gcnt2	NM_133219	14538	chr13	glucosaminyl (N-acetyl) transferase 2, I-branching enzyme	266	119.43	0.037838	0.131442	0.29165	0.617195	0.0817853	0.000106626	0.935586	0.391262	0.00316214	109.606	114.777	116.686	122.43	133.487	136.313	110.41	111.734	117.345	0.0179826	0.0574129	0.0870577	0.174497	0.308433	0.274626	20314	20876.9	21310.3	22641.9	24844.7	24269.3	19540	19798.4	20848.7	20402	20764	22297	23002	26424	24549	19020	18773	19775
Gcnt4	NM_001166065	218476	chr13	glucosaminyl (N-acetyl) transferase 4, core 2 (beta-1,6-N-acetylglucosaminyltransferase)	11095	1.08447	0.457521	0.893346	0.910079	0.065752	0.000261913	0.000198306	0.479494	0.00925936	0.00514451	0.998303	0.92823	1.63267	0.975453	1.5416	1.10756	0.786757	0.705199	0.687912	0.519586	0.388152	1.20555	0.483211	1.15021	0.611045	217.06	198.072	349.809	211.63	336.607	231.331	163.347	146.598	143.391	218	197	366	215	358	234	159	139	136
Gda	NM_010266	14544	chr19	guanine deaminase	2496	17.8859	0.134512	0.263263	-0.00401806	0.160681	0.00585008	0.966695	0.677856	0.0839607	0.9891	16.7721	19.6814	20.6763	19.1218	15.9779	17.4243	16.4939	16.9399	18.1166	0.0290656	0.232707	0.309688	0.215062	-0.0348224	0.0261582	3877.21	4465.15	4709.93	4410.85	3709.21	3869.4	3640.89	3743.91	4014.76	3894	4441	4928	4481	3945	3914	3544	3550	3808
Gem	NM_010276	14579	chr4	GTP binding protein (gene overexpressed in skeletal muscle)	11121	2.46515	0.607915	2.18663	1.80517	0.195604	2.71205e-06	0.000102172	0.718869	0.000275946	0.00305906	1.44726	1.39339	4.79333	3.69732	5.58944	0.876145	0.893607	1.03075	0.970566	0.642957	0.561764	2.34229	1.98674	2.59086	-0.131798	139.396	131.713	454.937	355.346	540.666	81.0597	82.191	94.9178	89.6195	140	131	476	361	575	82	80	90	85
Get4	NA	NA	NA	NA	5091	20.0088	0.0345692	0.180491	0.306605	0.751333	0.096051	0.00452669	0.961999	0.423565	0.0576031	18.712	18.0792	21.7244	18.9669	23.3253	21.4359	19.9556	17.8708	17.9886	0.0724399	-0.00423065	0.266448	0.088836	0.396276	0.210473	1681.72	1594.62	1923.92	1700.95	2105.18	1850.67	1712.57	1535.53	1549.82	1689	1586	2013	1728	2239	1872	1667	1456	1470
Gfap	NM_010277	14580	chr11	glial fibrillary acidic protein	11629	1.51825	-0.74036	0.818445	2.13165	0.0875526	0.0441814	1.26453e-07	0.538921	0.282341	9.14777e-06	0.52383	0.362266	1.53918	1.0805	2.83432	3.75444	0.890778	1.16068	0.256101	-0.482449	-1.03052	1.03595	0.546862	1.94022	2.28091	60.7372	41.2241	175.86	125.009	330.011	418.18	98.6235	128.646	28.4924	61	41	184	127	351	423	96	122	27
Gfpt2	NM_013529	14584	chr11	glutamine fructose-6-phosphate transaminase 2	11847	1.08731	-0.367655	0.226798	1.13362	0.207483	0.420242	3.10955e-05	0.729102	0.768201	0.00116865	0.53915	0.747699	1.09606	0.843818	1.99118	1.67176	0.700771	1.10805	0.768136	-0.600712	-0.161505	0.391247	0.0349375	1.27506	0.96014	68.7016	93.5055	137.628	107.291	254.803	204.639	85.2751	134.984	93.8412	69	93	144	109	271	207	83	128	89
Gfra1	NM_010279	14585	chr19	glial cell line derived neurotrophic factor family receptor alpha 1	932	47.6759	0.0286741	0.114392	0.631991	0.763857	0.229618	2.03394e-11	0.963539	0.616139	3.53539e-09	42.3216	40.4985	41.3821	46.4153	56.2136	71.0276	41.2001	42.348	42.6134	0.073243	-0.017348	0.0196349	0.203323	0.488805	0.762216	8423.51	7910.78	8116.22	9218.4	11235.8	13580.5	7830.37	8058.37	8130.73	8460	7868	8492	9365	11950	13737	7622	7641	7712
Ggta1	NM_010283	14594	chr2	glycoprotein galactosyltransferase alpha 1, 3	6300	8.19275	-0.232352	0.0188035	0.475446	0.0365055	0.863924	1.04978e-05	0.359171	0.9651	0.000464242	6.03793	7.00923	7.87812	7.62582	10.2602	11.2373	7.85994	7.63355	8.3006	-0.329144	-0.14121	0.0330757	0.00426011	0.441217	0.508385	923.997	1052.69	1187.99	1164.48	1576.76	1651.96	1148.57	1116.85	1217.71	928	1047	1243	1183	1677	1671	1118	1059	1155
Gimap6	NM_153175	231931	chr6	GTPase, IMAP family member 6	10469	4.31136	-0.564542	-0.401914	-0.184361	0.00219441	0.0274127	0.305816	0.0730401	0.217133	0.652342	3.30004	3.66356	4.22978	3.5563	4.60027	4.53285	4.72313	5.88494	5.38769	-0.625905	-0.502737	-0.290357	-0.521579	-0.142413	-0.227456	227.016	247.338	286.724	244.116	317.795	299.546	310.261	387.046	355.302	228	246	300	248	338	303	302	367	337
Git1	NM_001004144	216963	chr11	G protein-coupled receptor kinase-interactor 1	2332	28.8597	0.117745	0.00183762	0.294315	0.257666	0.985947	0.00446994	0.770719	0.996572	0.0571996	31.1241	25.9536	25.5986	27.0615	32.8014	32.2948	29.4656	26.5783	25.7573	0.255059	-0.0340509	-0.0480697	0.0502013	0.336849	0.250379	4848	3967.46	3929.08	4206.11	5130.84	4832.3	4382.63	3958	3846.08	4869	3946	4111	4273	5457	4888	4266	3753	3648
Gjb1	NM_008124	14618	chrX	gap junction protein, beta 1	11484	2.74039	-0.527438	-0.778272	-0.0969624	0.064973	0.00713663	0.728916	0.476076	0.0950159	0.904519	2.33943	2.29476	2.59792	1.29795	2.41983	3.91714	3.8423	3.21382	3.32479	-0.497721	-0.552229	-0.368502	-1.34312	-0.443382	0.184349	149.353	143.778	163.441	82.6801	155.124	240.232	234.233	196.167	203.485	150	143	171	84	165	243	228	186	193
Gjc3	NM_080450	118446	chr5	gap junction protein, gamma 3	6138	8.57573	0.0340047	-0.560786	-0.604168	0.846622	0.00176578	0.000771114	0.982172	0.0359913	0.0153426	10.0165	10.6408	8.23769	5.43866	5.08703	8.37006	10.6079	10.2072	10.5212	0.00361901	0.0637414	-0.29944	-0.879736	-0.966883	-0.313154	1502.49	1566.47	1217.63	814.051	766.274	1206.1	1519.44	1463.82	1512.92	1509	1558	1274	827	815	1220	1479	1388	1435
Gldn	NM_177350	235379	chr9	gliomedin	7417	4.40964	-0.222244	-0.468724	-0.292984	0.174767	0.00457188	0.0741519	0.691061	0.0709889	0.338292	4.15548	4.80239	4.12126	3.4209	4.81363	3.75554	4.40879	5.79917	6.01462	-0.315743	-0.13429	-0.348861	-0.599116	-0.0977933	-0.519421	824.428	935.057	805.696	677.228	959.039	715.747	835.232	1099.97	1143.91	828	930	843	688	1020	724	813	1043	1085
Glg1	NM_009149	20340	chr8	golgi apparatus protein 1	1532	39.2536	0.45128	0.230417	0.258442	0.00300462	0.131299	0.0903484	0.0878572	0.485869	0.369392	48.8342	40.2966	29.4818	46.889	40.7671	37.8742	35.6275	34.258	31.4917	0.595346	0.291076	-0.153831	0.533598	0.340975	0.170783	8065.07	6531.32	4797.85	7727.12	6761.21	6008.74	5618.51	5409.16	4985.77	8100	6496	5020	7850	7191	6078	5469	5129	4729
Glipr2	NM_027450	384009	chr4	GLI pathogenesis-related 2	7161	11.3688	-0.0381573	0.0408134	0.326523	0.739973	0.721271	0.00386891	0.959619	0.920746	0.0518965	10.4352	10.309	11.167	10.7279	13.7246	13.1984	10.8386	10.5495	11.705	-0.0160573	-0.0606411	0.0604091	0.020697	0.384932	0.264607	899.105	871.715	948.1	922.331	1187.51	1092.41	891.732	869.014	966.791	903	867	992	937	1263	1105	868	824	917
Glis2	NM_031184	83396	chr16	GLIS family zinc finger 2	8962	3.50487	-0.412579	-0.492325	0.0270486	0.0121652	0.00284858	0.866698	0.20714	0.0507112	0.953931	3.42983	2.54064	2.94541	2.70825	3.65561	4.54454	3.922	4.29266	4.15162	-0.200806	-0.659805	-0.441219	-0.543969	-0.102951	0.146657	529.706	385.084	448.244	417.361	566.951	674.228	578.395	633.83	614.659	532	383	469	424	603	682	563	601	583
Glrx2	NM_023505	69367	chr1	glutaredoxin 2 (thioltransferase)	4000	16.4121	-0.115876	-0.0307884	-0.303418	0.246409	0.757243	0.00256247	0.762219	0.933323	0.0386377	15.9384	16.1597	16.038	17.9666	13.9861	14.4445	17.3729	19.3903	17.274	-0.112288	-0.119465	-0.124527	0.0573486	-0.294636	-0.312134	2384.67	2372.83	2364.52	2682.34	2101.41	2076.07	2482.05	2773.66	2477.6	2395	2360	2474	2725	2235	2100	2416	2630	2350
Gltp	NM_019821	56356	chr5	glycolipid transfer protein	7174	14.0588	-0.63058	-0.697557	-0.143706	0.000131507	2.44083e-05	0.373914	0.0104828	0.0014901	0.709295	10.8042	11.5042	12.2175	9.06846	12.5428	19.1306	19.2642	17.9385	16.4451	-0.661978	-0.598576	-0.506043	-0.917386	-0.440925	0.103565	742.782	776.198	827.68	622.104	865.941	1263.44	1264.65	1179.07	1083.82	746	772	866	632	921	1278	1231	1118	1028
Gltscr2	NM_133831	68077	chr7	glioma tumor suppressor candidate region gene 2	3608	43.0894	0.122576	0.331716	0.263266	0.319537	0.00674335	0.0318014	0.82037	0.0920083	0.214228	41.0144	40.1346	48.7842	44.97	51.08	38.8603	41.2895	38.5823	35.9508	0.151441	0.0931016	0.380418	0.281114	0.474047	0.0157102	2725.2	2617.15	3194.11	2981.58	3408.34	2480.41	2619.71	2450.94	2289.94	2737	2603	3342	3029	3625	2509	2550	2324	2172
Gm10046	NA	NA	NA	NA	12191	3.04113	-0.170073	-1.44637	-0.562126	0.565505	7.81012e-06	0.0631363	0.922065	0.000626562	0.31035	3.21183	4.02645	1.3306	1.64591	2.08289	3.51046	4.30819	4.2127	4.11853	-0.324053	-0.028091	-1.59321	-1.27601	-0.934362	-0.254488	86.6241	106.576	35.3553	44.2956	56.3987	90.9527	110.954	108.631	106.489	87	106	37	45	60	92	108	103	101
Gm10638	NR_027829	666945	chr8	predicted gene 10638	11908	2.2379	0.124463	0.699496	0.573598	0.61871	0.00380905	0.0183011	0.935681	0.0623141	0.150702	1.83298	1.88599	2.77008	2.76645	2.75455	2.35488	1.92506	1.61318	1.75972	0.116684	0.130623	0.686751	0.702897	0.705862	0.417638	106.538	107.582	158.65	160.447	160.779	131.483	106.844	89.6511	98.0543	107	107	166	163	171	133	104	85	93
Gm13446	NA	NA	NA	NA	11082	2.58717	0.0356204	-0.23497	-0.524703	0.851499	0.222992	0.00751287	0.982172	0.608038	0.082906	2.97805	2.91098	2.68898	2.19017	2.02488	2.00074	2.89609	3.00745	3.02374	0.0649192	0.00521738	-0.102933	-0.379523	-0.482988	-0.56383	258.878	248.344	230.335	189.976	176.76	167.073	240.4	249.95	251.981	260	247	241	193	188	169	234	237	239
Gm13889	NM_001145034	620695	chr2	predicted gene 13889	2554	76.505	0.135085	0.535462	0.813986	0.390514	0.00060022	1.64847e-07	0.856133	0.0168425	1.17219e-05	66.9775	56.3815	90.7712	72.1411	110.82	87.9809	70.2038	56.7633	47.73	0.266254	-0.00919762	0.683485	0.370259	0.998654	0.601738	3690.02	3048.49	4927.84	3965.93	6131.26	4656.33	3693.28	2989.86	2520.83	3706	3032	5156	4029	6521	4710	3595	2835	2391
Gm14446	NM_001110517	667373	chr19	predicted gene 14446	11189	2.34623	0.163583	0.992878	1.03084	0.523906	6.51633e-05	3.30758e-05	0.908866	0.0032	0.00121748	1.29563	2.10262	3.09881	2.92211	3.7045	2.50408	1.73005	1.41206	1.55908	-0.208688	0.458423	1.0214	0.955051	1.30542	0.678582	122.468	195.054	288.633	275.615	351.652	227.376	156.156	127.618	141.28	123	194	302	280	374	230	152	121	134
Gm15760	NR_030670	100042948	chr16	mitochondrial ribosomal protein S18B pseudogene	10947	1.70265	0.167239	0.466132	0.649605	0.385792	0.0139169	0.000546959	0.853473	0.14466	0.0115628	1.63899	1.3519	1.80109	1.8788	2.03794	2.18403	1.2953	1.43313	1.41387	0.309932	0.00644885	0.424283	0.50307	0.629106	0.664862	240.956	195.056	260.915	275.616	300.869	308.444	181.843	201.436	199.266	242	194	273	280	320	312	177	191	189
Gm16551	NA	NA	NA	NA	7108	8.60579	-0.0307644	-0.255663	-0.523673	0.819612	0.0601337	0.000142012	0.974973	0.333292	0.00394075	9.64477	9.04577	9.0677	6.92539	6.83236	6.55667	10.3749	10.3987	8.90146	0.0277803	-0.0916892	-0.0823548	-0.452676	-0.462981	-0.586266	1114.17	1025.55	1032.21	798.302	792.613	727.612	1144.46	1148.49	985.775	1119	1020	1080	811	843	736	1114	1089	935
Gm2115	NA	NA	NA	NA	4879	23.6864	0.169571	-0.446318	-0.141487	0.167432	0.000374064	0.253822	0.683292	0.0120036	0.604718	28.4416	27.3185	19.4463	16.9244	18.9249	26.5877	26.9836	24.8637	25.1904	0.211477	0.126311	-0.357952	-0.5401	-0.36985	0.0563592	2261.21	2131.53	1523.46	1342.65	1510.94	2030.59	2048.51	1889.89	1919.88	2271	2120	1594	1364	1607	2054	1994	1792	1821
Gm2a	NM_010299	14667	chr11	GM2 ganglioside activator protein	4326	12.2946	-0.12326	-0.234071	-0.32234	0.258372	0.0324405	0.0033251	0.771138	0.238978	0.0468095	12.1593	12.4828	10.611	12.1772	10.475	11.1851	14.0034	15.2627	12.4315	-0.12862	-0.117821	-0.346246	-0.129619	-0.337556	-0.30697	2208.43	2225.03	1899.07	2206.9	1910.55	1951.5	2428.63	2650.26	2164.48	2218	2213	1987	2242	2032	1974	2364	2513	2053
Gm5595	NM_001008427	434179	chr7	predicted gene 5595	11338	1.41892	-0.13271	-0.615636	-0.506767	0.523846	0.00400342	0.0170129	0.908866	0.0645742	0.144057	1.47633	1.6717	1.27913	0.970209	1.22779	1.21919	1.72348	1.78353	1.85193	-0.209957	-0.0584566	-0.436786	-0.814944	-0.468427	-0.542119	198.141	220.191	169.168	129.931	165.477	157.187	220.881	228.858	238.274	199	219	177	132	176	159	215	217	226
Gm6981	NR_023357	629557	chr9	glyceraldehyde-3-phosphate dehydrogenase pseudogene	12026	1.81058	0.261056	0.801438	0.499601	0.358103	0.00371831	0.0742002	0.843424	0.0610692	0.338292	1.59153	1.57207	2.20149	2.39674	2.185	1.56273	1.58213	1.39294	1.12508	0.280941	0.236571	0.723892	0.863676	0.740331	0.19747	99.5684	96.5225	135.711	149.62	137.278	93.9149	94.5142	83.319	67.4866	100	96	142	152	146	95	92	79	64
Gm7271	NA	NA	NA	NA	4560	59.6061	0.135984	-0.0101158	-0.397031	0.156532	0.91643	5.03821e-05	0.672731	0.976964	0.0017134	65.6549	68.4061	62.0083	59.0207	48.3373	44.9839	65.6347	62.8028	61.0691	0.119822	0.151952	0.0161972	-0.0369001	-0.315642	-0.483294	2289.08	2340.66	2130.36	2053.34	1692.42	1506.63	2185.15	2093.43	2041.12	2299	2328	2229	2086	1800	1524	2127	1985	1936
Gm765	NM_001128092	330390	chr6	predicted gene 765	2046	142.489	0.13625	-0.0435184	-0.250214	0.13378	0.633643	0.00648523	0.636599	0.882171	0.0741212	156.996	157.817	137.304	140.347	125.158	117.511	157.888	146.894	140.245	0.146001	0.126449	-0.0685451	-0.0188107	-0.174837	-0.329774	5534.03	5459.52	4769.18	4936.5	4430.37	3979.13	5314.42	4950.4	4739.07	5558	5430	4990	5015	4712	4025	5173	4694	4495
Gmeb1	NM_020273	56809	chr4	glucocorticoid modulatory element binding protein 1	8054	2.64625	0.0912148	0.244871	0.369375	0.49571	0.0653214	0.00520165	0.897412	0.347798	0.0636973	2.56328	2.38937	2.61781	2.8873	3.08377	2.97182	2.24105	2.41559	2.56892	0.15361	0.0253562	0.162729	0.322005	0.426043	0.308811	719.882	658.562	724.452	809.132	869.712	801.757	600.997	648.597	691.62	723	655	758	822	925	811	585	615	656
Gmeb2	NM_198169	229004	chr2	glucocorticoid modulatory element binding protein 2	8457	3.8437	0.181356	0.357919	0.407659	0.195617	0.00999798	0.0032785	0.718869	0.119045	0.0465653	3.53723	3.74031	3.74311	4.46909	4.4367	4.13832	3.18093	3.50395	3.28347	0.154068	0.207444	0.214344	0.487828	0.486528	0.322282	611.351	634.431	637.478	770.743	770.048	687.079	524.973	578.989	544.022	614	631	667	783	819	695	511	549	516
Gna13	NM_010303	14674	chr11	guanine nucleotide binding protein, alpha 13	1568	23.7861	-0.0450108	0.360061	0.453328	0.687278	0.00114448	4.09133e-05	0.95125	0.0268666	0.00144641	20.045	19.5362	25.7501	26.6149	31.8705	24.3489	20.6544	21.4691	21.3258	-0.0132949	-0.0774522	0.326753	0.392515	0.661664	0.209327	5301.04	5070.42	6710.31	7023.31	8463.97	6185.7	5215.8	5428.14	5406.43	5324	5043	7021	7135	9002	6257	5077	5147	5128
Gng11	NM_025331	66066	chr6	guanine nucleotide binding protein (G protein), gamma 11	10645	7.76348	-0.290687	-0.609476	-0.259402	0.185179	0.00620354	0.235735	0.706226	0.087135	0.586369	5.96538	9.12085	6.78854	5.27497	6.44824	9.1333	9.247	10.1295	9.23706	-0.610591	-0.0273616	-0.446055	-0.790272	-0.492817	-0.0561683	213.076	319.729	238.938	188.007	231.285	313.388	315.396	345.918	316.295	214	318	250	191	246	317	307	328	300
Gng12	NM_025278	14701	chr6	guanine nucleotide binding protein (G protein), gamma 12	4631	11.1659	-0.0421841	0.340655	0.160941	0.732308	0.00518475	0.188729	0.956435	0.0776162	0.534377	8.63455	11.1926	13.0537	12.7452	12.2511	10.7003	9.6078	11.1422	10.9275	-0.226141	0.120942	0.348591	0.332215	0.28438	0.0252271	1571.19	1998.81	2340.63	2314.2	2238.69	1870.44	1669.43	1938.4	1906.17	1578	1988	2449	2351	2381	1892	1625	1838	1808
Gng7	NM_010319	14708	chr10	guanine nucleotide binding protein (G protein), gamma 7	8079	4.95462	-0.0745904	-0.774313	-0.424373	0.606698	2.29359e-07	0.00388644	0.933148	3.45835e-05	0.0520201	5.72228	5.5163	3.68957	3.22611	3.73456	5.19625	6.21991	6.33202	5.83901	-0.0351417	-0.115009	-0.688522	-0.863714	-0.643834	-0.231956	836.377	791.28	531.395	470.515	548.144	729.59	868.103	884.831	818.14	840	787	556	478	583	738	845	839	776
Golim4	NM_175193	73124	chr3	golgi integral membrane protein 4	3102	17.1378	-0.0602191	-0.308181	-0.392359	0.556537	0.00283389	0.000151305	0.920112	0.0505216	0.0041435	18.0147	19.0571	15.6252	15.5555	13.0646	16.7085	19.2115	19.8655	20.954	-0.087506	-0.0334483	-0.313966	-0.302299	-0.544782	-0.253992	3434.12	3565.28	2935.1	2958.94	2501.01	3059.73	3497.06	3620.52	3829.21	3449	3546	3071	3006	2660	3095	3404	3433	3632
Golm1	NM_027307	105348	chr13	golgi membrane protein 1	7858	5.06376	-0.120644	-0.484958	-0.198547	0.465415	0.00381926	0.230644	0.88477	0.0623995	0.581764	4.44073	6.17548	3.96798	4.25666	4.1511	6.02037	5.69141	5.80636	6.40481	-0.361864	0.0862406	-0.545208	-0.425954	-0.452975	0.0187475	674.079	919.975	593.515	644.746	632.764	877.881	824.956	842.648	931.999	677	915	621	655	673	888	803	799	884
Got1	NM_010324	14718	chr19	glutamate oxaloacetate transaminase 1, soluble	694	131.637	0.0134224	0.144605	0.267854	0.864844	0.0657139	0.000628984	0.982172	0.348724	0.0129683	125.666	117.49	129.949	136.156	144.406	148.268	125.233	125.927	123.232	0.0741407	-0.0499829	0.10126	0.18669	0.280741	0.254794	11031.2	10121.7	11240.6	11926.3	12729.8	12502.9	10497.3	10568.4	10370.1	11079	10067	11761	12116	13539	12647	10218	10021	9836
Gpatch11	NA	NA	NA	NA	4392	12.1713	0.407921	0.0781357	-0.207302	0.000142446	0.470265	0.0579028	0.011212	0.798523	0.296764	14.7356	15.5157	11.075	12.9564	9.21501	10.7307	12.2669	10.8753	12.2701	0.383953	0.431272	-0.0490951	0.195268	-0.286901	-0.13133	2645.54	2733.78	1959.28	2321.09	1661.38	1850.67	2102.96	1866.69	2111.76	2657	2719	2050	2358	1767	1872	2047	1770	2003
Gpm6a	NM_153581	234267	chr8	glycoprotein m6a	3416	23.0478	-0.100877	-0.0851001	-0.541998	0.350607	0.430594	7.93128e-07	0.840422	0.774307	4.86568e-05	22.1913	25.9008	23.0728	25.4541	17.2648	18.4565	23.9104	28.1322	28.0218	-0.202141	-0.00628241	-0.16718	-0.00741453	-0.558078	-0.525826	2808.83	3217.4	2877.76	3214.87	2194.5	2244.13	2889.91	3404.32	3400.11	2821	3200	3011	3266	2334	2270	2813	3228	3225
Gpm6b	NM_023122	14758	chrX	glycoprotein m6b	400	127.596	-0.15132	-0.150591	-0.506429	0.117026	0.118756	2.11224e-07	0.603055	0.464156	1.46859e-05	117.185	144.188	130.888	130.126	94.2167	112.048	140.775	151.346	158.382	-0.293754	-0.0216827	-0.155447	-0.145752	-0.602379	-0.416365	14662.5	17705.7	16137.8	16246.6	11838.5	13467.8	16819.6	18104.7	18997.4	14726	17610	16885	16505	12591	13623	16372	17167	18019
Gpnmb	NM_053110	93695	chr6	glycoprotein (transmembrane) nmb	10679	1.75736	-0.183616	0.330594	0.991773	0.425368	0.141195	6.69708e-06	0.86843	0.500866	0.000319901	1.10578	1.2705	2.02865	1.36334	2.15469	3.28269	1.55328	1.29993	1.33675	-0.27132	-0.0989629	0.579344	0.0261377	0.693214	1.23535	179.223	202.093	324.002	220.49	350.693	511.109	240.397	201.44	207.703	180	201	339	224	373	517	234	191	197
Gpr116	NM_001081178	224792	chr17	G protein-coupled receptor 116	6550	3.27693	0.134918	0.167087	0.426154	0.379792	0.275936	0.00512708	0.850546	0.659917	0.0630928	2.6544	3.51312	3.62423	2.67316	3.83785	3.7607	2.83567	3.31628	2.56355	-0.0659137	0.311033	0.36177	-0.0588721	0.471616	0.378359	966.811	1255.79	1300.78	971.547	1403.76	1315.83	986.248	1154.81	895.107	971	1249	1361	987	1493	1331	960	1095	849
Gpr137b	NM_031999	83924	chr13	G protein-coupled receptor 137B	5583	11.8494	-0.275725	-0.350524	-0.177599	0.0131019	0.00165155	0.108243	0.214061	0.0346216	0.405951	10.8559	11.5162	10.2166	10.9958	10.9073	13.2914	13.3032	13.7092	15.0513	-0.30494	-0.246875	-0.413659	-0.289589	-0.292055	-0.0710306	1381.02	1437.78	1280.7	1395.8	1393.42	1624.28	1616.01	1667.36	1835.53	1387	1430	1340	1418	1482	1643	1573	1581	1741
Gpr137b-ps	NR_003568	664862	chr13	G protein-coupled receptor 137B, pseudogene	7708	6.39968	-0.44291	-0.190576	-0.210977	0.000746456	0.141406	0.103746	0.037071	0.501471	0.397181	5.20426	5.64049	6.33695	6.56301	6.72143	6.10059	7.07208	7.55865	8.26332	-0.487643	-0.398725	-0.22515	-0.156543	-0.112994	-0.316584	653.17	694.757	783.71	821.928	847.148	735.52	847.558	906.979	994.202	656	691	820	835	901	744	825	860	943
Gpr146	NM_030258	80290	chr5	G protein-coupled receptor 146	7421	5.39006	0.0123443	0.78997	0.822275	0.950623	5.31993e-05	2.56387e-05	0.992073	0.00272865	0.000996486	3.76525	4.03951	6.65347	6.71017	8.90004	4.79934	4.31655	3.93614	3.76586	-0.025208	0.0490419	0.773982	0.804318	1.22067	0.266527	653.17	687.719	1137.34	1161.53	1550.45	799.778	715.028	652.816	626.259	656	684	1190	1180	1649	809	696	619	594
Gpr149	NM_177346	229357	chr3	G protein-coupled receptor 149	6870	7.47116	0.0351671	-0.0562055	-0.353911	0.758093	0.623514	0.00229547	0.962844	0.876576	0.0356424	8.07105	7.87992	7.63732	7.32421	6.38594	5.88427	8.38095	8.20561	7.60163	0.0656453	0.0040472	-0.0351852	-0.07742	-0.265809	-0.447662	1149.02	1100.95	1071.39	1040.45	912.963	804.723	1139.32	1116.85	1037.43	1154	1095	1121	1057	971	814	1109	1059	984
Gpr151	NM_181543	240239	chr18	G protein-coupled receptor 151	11799	2.13392	-0.03281	0.544335	2.83132	0.916401	0.0696744	1.47245e-23	0.985159	0.360078	6.8251e-21	0.842977	0.735051	1.28045	1.07582	4.43363	7.25085	0.771919	0.680649	1.05737	0.0732522	-0.147387	0.647059	0.416774	2.45448	3.09851	58.7454	50.2726	87.9279	74.808	310.262	485.406	51.3709	45.3608	70.6311	59	50	92	76	330	491	50	43	67
Gpr153	NM_178406	100129	chr4	G protein-coupled receptor 153	3812	16.6579	0.116085	0.0638878	0.517793	0.348937	0.606603	2.44086e-05	0.839138	0.868728	0.000963641	17.3522	13.6528	14.9956	14.9149	18.3732	23.0874	16.1865	14.7004	13.6124	0.290469	-0.0823821	0.058744	0.0690771	0.378996	0.644396	2796.89	2159.68	2381.72	2398.85	2973.95	3574.79	2491.3	2265.33	2103.33	2809	2148	2492	2437	3163	3616	2425	2148	1995
Gpr19	NR_072990	14760	chr6	G protein-coupled receptor 19	9763	5.88832	0.101829	0.2658	0.66772	0.518778	0.0889006	1.36916e-05	0.906395	0.4065	0.000576936	5.06418	5.26872	6.05989	5.50646	7.9588	7.45039	4.96901	4.82907	5.1574	0.0864995	0.116464	0.323616	0.203864	0.743323	0.58436	357.451	364.974	421.483	387.831	564.137	505.175	334.915	325.884	348.975	359	363	441	394	600	511	326	309	331
Gpr22	NM_175191	73010	chr12	G protein-coupled receptor 22	8832	2.91306	0.11416	0.382634	-0.462424	0.470967	0.0145766	0.00441439	0.885918	0.150269	0.0569625	2.8332	3.2972	3.61211	3.75943	2.32455	1.80326	2.67113	3.00358	3.11819	0.0150068	0.206418	0.34365	0.419342	-0.263827	-0.69312	554.597	633.426	696.737	734.321	456.955	339.089	499.291	562.117	585.136	557	630	729	746	486	343	486	533	555
Gpr3	NM_008154	14748	chr4	G-protein coupled receptor 3	10969	2.75321	0.501285	0.317021	1.02376	0.0139533	0.122671	2.88164e-07	0.222621	0.469344	1.95999e-05	3.07027	2.3189	2.52416	2.22207	3.85968	3.96109	2.19992	1.86961	1.85198	0.698395	0.268182	0.395789	0.230771	1.03351	1.00698	280.784	208.127	227.466	202.773	354.463	347.988	192.112	163.473	162.369	282	207	238	206	377	352	187	155	154
Gpr37	NM_010338	14763	chr6	G protein-coupled receptor 37	8572	4.51342	0.128686	-0.248863	-0.395898	0.333417	0.065823	0.0036838	0.830556	0.348782	0.0502209	5.19781	5.40808	4.2974	3.85867	3.42274	4.0255	5.05004	4.84716	5.17036	0.113407	0.1435	-0.181803	-0.3188	-0.48225	-0.31258	710.92	725.926	579.182	526.623	470.108	528.903	659.553	633.834	677.916	714	722	606	535	500	535	642	601	643
Gpr37l1	NM_134438	171469	chr1	G protein-coupled receptor 37-like 1	3331	31.543	-0.216752	-0.943818	0.00474952	0.190688	2.86218e-08	0.976979	0.715859	6.63337e-06	0.992888	32.3726	30.4959	20.8012	17.1754	26.5653	47.8561	38.9409	38.1365	36.4666	-0.161206	-0.274403	-0.820271	-1.07834	-0.440265	0.344639	3112.52	2877.56	1970.75	1647.79	2564.94	4420.05	3575.14	3505.57	3361.1	3126	2862	2062	1674	2728	4471	3480	3324	3188
Gpr56	NM_018882	14766	chr8	G protein-coupled receptor 56	957	60.1227	0.103086	0.0834676	0.279593	0.259728	0.36162	0.00214055	0.771513	0.723712	0.0338245	61.0318	56.8504	53.4818	62.6856	65.1559	69.3292	58.534	53.9133	58.1197	0.166353	0.0368974	-0.0453674	0.201809	0.266757	0.292292	9389.33	8583.42	8107.61	9622.97	10066.1	10245.9	8598.82	7929.7	8571.43	9430	8537	8483	9776	10706	10364	8370	7519	8130
Gprc5b	NM_022420	64297	chr7	G protein-coupled receptor, family C, group 5, member B	2836	33.4205	-0.0850327	-0.370359	-0.449421	0.370763	0.000112782	2.98731e-06	0.84903	0.00495252	0.000161845	36.8494	34.8183	31.0533	27.7337	27.3861	28.8008	41.8079	38.9147	37.4179	-0.0315939	-0.140443	-0.299645	-0.444589	-0.453592	-0.444957	4022.58	3730.17	3340.34	3020.96	3002.16	3020.19	4357.97	4061.35	3915.66	4040	3710	3495	3069	3193	3055	4242	3851	3714
Gpx8	NM_027127	69590	chr13	glutathione peroxidase 8 (putative)	9135	11.8002	-0.299997	-0.564939	-0.314924	0.0912061	0.00166387	0.0760878	0.544702	0.0347635	0.342374	10.1044	12.6414	9.99943	8.896	9.02639	13.7666	15.2109	14.7562	13.4945	-0.454679	-0.159192	-0.490888	-0.641091	-0.611024	-0.0671995	438.102	537.909	427.218	384.877	393.004	573.391	629.76	611.684	560.893	440	535	447	391	418	580	613	580	532
Grhl3	NM_001013756	230824	chr4	grainyhead-like 3 (Drosophila)	9952	3.16272	-0.0268064	-0.41351	-0.791289	0.877684	0.0196536	1.24117e-05	0.983169	0.17993	0.000537483	3.13163	4.25885	2.93608	2.70338	2.25792	2.11736	3.69227	4.20427	3.78364	-0.249381	0.16612	-0.363322	-0.464025	-0.713752	-0.869891	371.39	495.68	343.111	319.911	268.904	241.218	418.13	476.69	430.158	373	493	359	325	286	244	407	452	408
Gria2	NM_013540	14800	chr3	glutamate receptor, ionotropic, AMPA2 (alpha 2)	6346	4.16225	-0.00923932	-0.165243	-0.47239	0.933319	0.136716	2.73912e-05	0.989608	0.494793	0.00104832	4.65888	4.42165	4.08978	4.05484	3.39311	3.24664	4.40389	5.0292	4.76927	0.0409257	-0.0614706	-0.1681	-0.162365	-0.409982	-0.537536	1360.11	1266.85	1176.52	1181.21	994.763	910.503	1227.67	1403.7	1334.74	1366	1260	1231	1200	1058	921	1195	1331	1266
Grik1	NM_146072	14805	chr16	glutamate receptor, ionotropic, kainate 1	536	87.6953	0.104056	0.0382638	-0.240798	0.244252	0.668969	0.00758063	0.76035	0.898023	0.0833669	92.3024	98.9431	87.2099	95.2328	76.8659	74.8906	85.7156	90.4022	100.208	0.0669995	0.140147	-0.0360971	0.108976	-0.190924	-0.292503	14074	14806.1	13103.3	14489.6	11769.8	10969.6	12480.1	13178.6	14647.3	14135	14726	13710	14720	12518	11096	12148	12496	13893
Grwd1	NM_153419	101612	chr7	glutamate-rich WD repeat containing 1	8512	8.02652	0.14552	0.190467	0.473014	0.325962	0.197202	0.00120936	0.825109	0.576228	0.0221275	8.09624	6.99251	7.54016	8.02131	8.3168	10.8532	7.5288	6.86312	6.81546	0.259486	0.0213605	0.135784	0.242983	0.304255	0.623842	657.153	557.013	603.073	649.668	677.897	846.246	583.529	532.59	530.317	660	554	631	660	721	856	568	505	503
Gsap	NA	NA	NA	NA	10709	1.66247	-0.601321	-0.715535	-0.483454	0.014136	0.00365532	0.0469934	0.223072	0.0602719	0.26522	1.27718	1.609	1.62646	1.03698	1.14825	2.0284	2.28884	2.28464	2.22274	-0.759782	-0.455	-0.433636	-1.06185	-0.906592	-0.152767	204.115	252.365	256.145	165.366	184.269	311.412	349.297	349.084	340.543	205	251	268	168	196	315	340	331	323
Gse1	NM_198671	382034	chr8	genetic suppressor element 1	6126	4.57151	0.16619	-0.244816	-0.317845	0.164917	0.0438243	0.00907437	0.680716	0.281378	0.0961607	5.88433	4.88304	4.11418	3.98432	3.66044	4.12059	5.33864	4.58652	4.99583	0.306525	0.010542	-0.230596	-0.258722	-0.371748	-0.265033	1682.71	1370.41	1159.32	1136.92	1051.17	1131.95	1457.79	1253.95	1369.53	1690	1363	1213	1155	1118	1145	1419	1189	1299
Gstk1	NM_029555	76263	chr6	glutathione S-transferase kappa 1	10588	7.11167	-0.153892	-1.12913	-0.395019	0.436994	6.70978e-08	0.0483548	0.87322	1.25077e-05	0.270644	8.00309	8.0797	4.64336	3.52953	5.54392	8.2459	9.75905	9.08878	8.95071	-0.146796	-0.160086	-0.950019	-1.32527	-0.66847	-0.161574	317.624	314.702	181.593	139.774	220.942	314.377	369.843	344.867	340.544	319	313	190	142	235	318	360	327	323
Gstm7	NM_026672	68312	chr3	glutathione S-transferase, mu 7	11219	3.7961	0.0318342	-0.697898	-0.474445	0.880377	0.00151767	0.0287663	0.983169	0.0326912	0.201093	4.14789	4.78296	2.66466	2.71015	2.84124	3.51105	5.274	4.43689	3.8509	-0.0594999	0.118226	-0.715592	-0.673312	-0.596535	-0.356494	230.999	261.414	146.225	150.604	158.89	187.835	280.462	236.241	205.598	232	260	153	153	169	190	273	224	195
Gstt1	NM_008185	14871	chr10	glutathione S-transferase, theta 1	9583	9.45978	-0.416966	-0.9846	-0.499065	0.0205363	1.08867e-07	0.00569586	0.269122	1.84118e-05	0.0675675	8.54978	10.5796	6.68471	6.19695	7.34146	10.9531	12.9093	12.4633	14.265	-0.56272	-0.283135	-0.937848	-1.02871	-0.775906	-0.263999	378.36	459.485	291.501	273.647	326.248	465.633	545.519	527.318	605.167	380	457	305	278	347	471	531	500	574
Gstt3	NM_133994	103140	chr10	glutathione S-transferase, theta 3	11848	1.63276	-0.15684	-0.997492	-0.440753	0.567433	0.00052728	0.11284	0.922065	0.0153976	0.415512	1.71906	1.96104	1.27413	0.777526	1.15966	1.90554	2.15363	2.11152	2.10519	-0.239079	-0.0772631	-0.688506	-1.37432	-0.796189	-0.149068	137.404	153.832	100.358	62.0098	93.0682	146.315	164.376	161.362	161.312	138	153	105	63	99	148	160	153	153
Gtf2h3	NM_181410	209357	chr5	general transcription factor IIH, polypeptide 3	9460	3.9499	-0.175172	-0.558359	-0.254178	0.336911	0.00262032	0.164509	0.832651	0.0473892	0.503465	3.78355	4.35258	3.1652	3.06304	2.94836	4.86109	4.83587	4.58952	4.83697	-0.264776	-0.0901058	-0.542748	-0.571874	-0.617656	0.0381852	430.136	485.626	354.58	347.473	336.588	530.882	524.972	498.842	527.152	432	483	371	353	358	537	511	473	500
Gtf2ird1	NM_020331	57080	chr5	general transcription factor II I repeat domain-containing 1	7480	6.62418	0.355678	0.30331	0.417963	0.00414921	0.0145947	0.000722687	0.108408	0.150331	0.0145643	7.09406	6.70843	6.11037	7.18683	7.29275	7.24212	5.85898	5.49992	5.40316	0.408149	0.30055	0.171821	0.423765	0.454029	0.38003	971.79	901.878	824.805	982.377	1003.22	953.014	766.396	720.312	709.547	976	897	863	998	1067	964	746	683	673
Gtpbp6	NM_145147	107999	chr5	GTP binding protein 6 (putative)	9470	6.7704	0.105027	0.205918	0.531202	0.528919	0.214344	0.00117716	0.912456	0.597575	0.0217849	6.70341	5.5446	6.7973	6.34079	8.72156	7.86923	6.71249	5.47387	5.5213	0.247243	-0.0529223	0.246074	0.164078	0.632281	0.420264	461.999	375.029	461.624	436.064	603.628	520.993	441.755	360.688	364.794	464	373	483	443	642	527	430	342	346
Gulp1	NM_028450	70676	chr1	GULP, engulfment adaptor PTB domain containing 1	8194	5.46362	-0.0497756	-0.203877	-0.605631	0.775766	0.245711	0.000700581	0.965981	0.631067	0.0141873	5.40961	6.67123	5.43762	5.39838	3.10371	5.22662	6.26883	6.19295	6.94511	-0.193742	0.0812447	-0.207508	-0.199844	-0.987706	-0.301172	687.023	831.497	680.49	684.119	395.822	637.651	760.233	751.951	845.547	690	827	712	695	421	645	740	713	802
Gyg	NM_013755	27357	chr3	glycogenin	949	125.405	0.0521665	-0.143603	-0.225184	0.511122	0.0719817	0.00488729	0.901892	0.367406	0.060679	135.179	135.894	122.343	114.156	114.224	111.245	132.529	137.67	135.97	0.0618484	0.0423887	-0.103298	-0.185096	-0.175041	-0.277193	9928	9794.97	8854.06	8365.96	8424.48	7848.53	9294.33	9666.66	9573.01	9971	9742	9264	8499	8960	7939	9047	9166	9080
Gypc	NM_001048207	71683	chr18	glycophorin C	9668	4.3953	-0.392996	-1.09208	-0.539819	0.07277	1.41632e-06	0.0142547	0.500822	0.000161139	0.128159	4.00984	5.039	3.01026	2.55314	2.80531	5.49282	5.97343	6.27859	6.18891	-0.55102	-0.249231	-0.98455	-1.20321	-1.05879	-0.155881	373.382	460.49	276.21	237.225	262.307	491.338	531.137	558.953	552.455	375	458	289	241	279	497	517	530	524
H13	NM_010376	14950	chr2	histocompatibility 13	1816	118.061	-0.0267918	0.132334	0.296256	0.756632	0.123922	0.000541863	0.962844	0.471823	0.011484	104.845	107.965	115.195	122.139	136.743	131.556	115.128	110.919	110.728	-0.0344056	-0.0191788	0.0801736	0.182715	0.354822	0.235026	4903.76	4955.8	5309.18	5700.35	6422.72	5910.87	5141.83	4959.89	4964.68	4925	4929	5555	5791	6831	5979	5005	4703	4709
H2-Aa	NM_010378	14960	chr17	histocompatibility 2, class II antigen A, alpha	4679	44.7741	-0.615335	-1.11079	-1.27191	0.0150095	1.66121e-05	9.7821e-07	0.228243	0.00108848	5.8114e-05	33.3063	51.0003	29.8292	29.7977	22.1039	31.9433	68.133	92.0789	40.1156	-0.938424	-0.351109	-1.1186	-1.10202	-1.52338	-1.05657	1519.42	2283.35	1340.91	1356.43	1012.62	1399.86	2967.98	4015.99	1754.37	1526	2271	1403	1378	1077	1416	2889	3808	1664
H2-Ab1	NM_207105	14961	chr17	histocompatibility 2, class II antigen A, beta 1	5696	30.093	-0.613201	-1.21931	-1.17821	0.0179712	4.40826e-06	8.80448e-06	0.250177	0.000405657	0.000400684	22.7256	33.9073	17.8319	19.2601	15.5767	23.1249	47.8013	60.5161	26.0738	-0.913798	-0.363995	-1.28453	-1.15539	-1.45211	-0.946589	1156.99	1694.16	894.576	978.439	796.364	1130.96	2323.84	2945.55	1272.56	1162	1685	936	994	847	1144	2262	2793	1207
H2afj	NM_177688	232440	chr6	H2A histone family, member J	9678	5.63302	-0.121016	-0.0293274	0.554788	0.555267	0.885767	0.00557135	0.91974	0.969896	0.0664685	4.41863	4.70412	5.34923	4.36508	6.98902	7.72167	6.72014	4.79625	3.89322	-0.152181	-0.089111	0.101648	-0.172832	0.513828	0.593495	344.507	359.947	410.972	339.597	547.209	578.333	500.309	357.524	291	346	358	430	345	582	585	487	339	276
H2-Eb1	NM_010382	14969	chr17	histocompatibility 2, class II antigen E beta	4904	26.8113	-0.63232	-1.11217	-1.23695	0.00963765	7.91678e-06	7.75568e-07	0.184427	0.000630406	4.80507e-05	20.6059	29.3	17.8392	17.8529	13.4741	19.7084	41.1471	54.5629	24.3199	-0.892201	-0.411711	-1.12127	-1.10206	-1.49849	-1.01431	1467.64	2048.08	1252.03	1268.82	963.726	1348.46	2798.47	3715.42	1660.54	1474	2037	1310	1289	1025	1364	2724	3523	1575
H2-K1	NM_001001892	14972	chr17	histocompatibility 2, K1, K region	2569	58.5284	-0.425127	-0.492668	-0.0973754	0.00627386	0.00157412	0.527091	0.142636	0.0335607	0.812473	44.1832	53.5995	50.6064	42.5805	57.4619	66.3832	75.7092	77.7035	50.4311	-0.556259	-0.304689	-0.381718	-0.612657	-0.171181	-0.0270295	3103.56	3694.98	3502.82	2984.54	4053.33	4479.37	5078.13	5218.26	3395.9	3117	3675	3665	3032	4311	4531	4943	4948	3221
H2-Q4	NA	NA	NA	NA	7755	10.9163	-0.660144	-0.428482	-0.183785	0.0025777	0.0481991	0.392647	0.0797852	0.294537	0.725632	7.27414	8.70295	10.7492	7.99325	12.5667	9.7645	14.0607	16.2186	8.92584	-0.779578	-0.54831	-0.238229	-0.646918	0.0141712	-0.413339	556.588	653.534	810.477	610.292	965.621	717.725	1027.34	1186.44	654.735	559	650	848	620	1027	726	1000	1125	621
H2-T23	NM_010398	15040	chr17	histocompatibility 2, T region locus 23	9443	8.47912	-0.757716	-0.994545	-0.417672	0.0098828	0.000801176	0.149238	0.187309	0.0209326	0.478233	5.17306	7.76529	6.71314	4.24758	6.86346	9.68643	13.017	14.367	6.55537	-1.06158	-0.504224	-0.707899	-1.348	-0.648855	-0.216774	290.74	428.316	371.79	238.208	387.364	522.972	698.589	771.976	353.21	292	426	389	242	412	529	680	732	335
H3f3b	NM_008211	15081	chr11	H3 histone, family 3B	1415	80.5613	0.387453	0.10219	0.275531	8.46563e-05	0.302879	0.00527806	0.00735746	0.676127	0.0642287	80.9065	101.628	79.0292	70.5077	86.0307	84.071	69.7252	72.592	74.2366	0.228597	0.530451	0.173505	0.0270407	0.323259	0.226001	6881.19	8482.87	6623.34	5983.84	7347.91	6868.82	5662.69	5902.72	6052.72	6911	8437	6930	6079	7815	6948	5512	5597	5741
H6pd	NM_173371	100198	chr4	hexose-6-phosphate dehydrogenase (glucose 1-dehydrogenase)	9675	2.15898	-0.22045	0.330611	0.737976	0.212614	0.054734	1.36226e-05	0.732107	0.316834	0.000576936	1.56824	1.45679	1.95386	2.47427	3.06029	2.8658	2.00263	1.88992	1.5856	-0.154782	-0.287769	0.140302	0.498312	0.813593	0.655105	317.624	289.567	389.938	500.048	622.431	557.572	387.307	365.957	307.864	319	288	408	508	662	564	377	347	292
Hapln1	NM_013500	12950	chr13	hyaluronan and proteoglycan link protein 1	4217	10.6339	0.0465434	0.197136	-0.285861	0.656431	0.0581926	0.00690677	0.946412	0.327852	0.0779425	10.1313	11.7683	12.216	12.0541	8.97121	8.54414	10.0494	11.3367	11.5321	-0.0510803	0.137853	0.197547	0.196418	-0.220358	-0.354681	2185.53	2491.47	2596.77	2594.74	1943.46	1770.59	2070.09	2338.1	2384.82	2195	2478	2717	2636	2067	1791	2015	2217	2262
Hbegf	NM_010415	15200	chr18	heparin-binding EGF-like growth factor	9738	4.1711	0.305784	0.573145	0.593043	0.0805391	0.000918848	0.000597241	0.520068	0.0229988	0.0123749	3.58574	4.2353	4.78485	4.61346	5.44106	4.14277	3.33314	3.23246	3.25533	0.194922	0.407493	0.588937	0.554508	0.801265	0.344898	363.425	421.278	477.871	466.579	553.799	403.348	322.586	313.228	316.294	365	419	500	474	589	408	314	297	300
Hcn1	NM_010408	15165	chr13	hyperpolarization-activated, cyclic nucleotide-gated K+ 1	1199	23.2181	0.263886	0.143767	0.134766	0.00326899	0.109992	0.134153	0.091498	0.452015	0.453088	25.6382	24.3891	22.1132	23.8757	23.6148	22.4998	20.5294	23.0846	21.1325	0.312541	0.213414	0.0779513	0.206686	0.200031	0.066235	8655.51	8080.7	7356.4	8043.09	8006.08	7296.89	6618.12	7450.9	6839.22	8693	8037	7697	8171	8515	7381	6442	7065	6487
Hcrtr1	NM_198959	230777	chr4	hypocretin (orexin) receptor 1	11052	2.57537	0.37866	0.193742	0.624935	0.054119	0.328197	0.00127768	0.438098	0.697721	0.0230739	2.53909	2.71133	2.24474	2.36762	3.2403	3.03234	2.3401	2.12748	1.80294	0.343388	0.410723	0.145262	0.239848	0.699943	0.540776	236.973	248.343	206.437	220.493	303.692	271.865	208.549	189.836	161.317	238	247	216	224	323	275	203	180	153
Hcrtr2	NM_198962	387285	chr9	hypocretin (orexin) receptor 2	7583	5.30954	0.0682044	-0.163106	-0.470759	0.573985	0.182786	0.000152653	0.924941	0.559991	0.0041622	5.66399	6.40095	5.10893	5.15273	4.23141	4.13351	5.57912	6.20566	6.08338	-0.00847344	0.140757	-0.178308	-0.147908	-0.422549	-0.520194	901.096	999.405	800.914	817.991	676.024	631.717	847.558	943.889	927.784	905	994	838	831	719	639	825	895	880
Hdac7	NM_019572	56233	chr15	histone deacetylase 7	10118	1.9526	0.2952	0.400898	0.510979	0.126071	0.0367274	0.00749882	0.620929	0.254087	0.0828312	1.76374	2.06373	2.18952	1.92322	2.60911	1.85075	1.49906	1.72167	1.62148	0.191368	0.39034	0.481307	0.312782	0.760942	0.202851	326.585	375.028	399.501	355.347	485.164	329.203	265.057	304.787	287.827	328	373	418	361	516	333	258	289	273
Hdgfrp3	NM_013886	29877	chr7	hepatoma-derived growth factor, related protein 3	3121	13.2752	0.146097	0.284407	-0.020557	0.167822	0.00701971	0.846792	0.68359	0.0943627	0.945708	12.0477	15.0349	14.4355	15.3082	12.0467	12.2632	11.7934	13.2724	12.9164	-0.00755194	0.284846	0.23201	0.334789	-0.0015921	-0.0399105	3016.93	3694.98	3562.07	3825.17	3029.42	2949.99	2820.05	3177.58	3100.69	3030	3675	3727	3886	3222	2984	2745	3013	2941
Heatr5a	NM_177171	320487	chr12	HEAT repeat containing 5A	3320	9.28481	0.0153185	-0.449852	-0.341579	0.907409	0.000762541	0.010296	0.984257	0.0201333	0.10476	10.9309	9.81181	7.85714	7.16621	6.62631	9.78784	10.5411	11.5572	9.80581	0.103824	-0.0790226	-0.393579	-0.508208	-0.611983	-0.11341	3620.32	3189.25	2564.27	2368.34	2203.89	3114.1	3333.72	3659.54	3113.34	3636	3172	2683	2406	2344	3150	3245	3470	2953
Heca	NM_001033432	380629	chr10	headcase homolog (Drosophila)	5461	10.3606	-0.046554	0.391522	0.466466	0.704183	0.00118979	0.000108792	0.951814	0.0275235	0.00321875	8.32237	8.76604	11.6274	11.4981	13.755	10.7589	8.69696	9.45981	9.25577	-0.0706788	-0.0228622	0.390253	0.392233	0.659852	0.241615	1302.36	1346.28	1792.98	1795.45	2161.6	1617.35	1299.59	1415.3	1388.51	1308	1339	1876	1824	2299	1636	1265	1342	1317
Hectd1	NM_144788	207304	chr12	HECT domain containing 1	1912	14.0022	0.432633	0.208975	0.243453	4.18759e-06	0.0269611	0.00989457	0.000793353	0.215465	0.102002	15.8999	15.9885	12.8509	14.423	14.5704	13.6112	11.7668	12.9072	12.0312	0.442032	0.422976	0.113717	0.298306	0.322156	0.159913	6098.58	6018.55	4857.11	5520.21	5612.24	5015.19	4309.69	4733.14	4423.83	6125	5986	5082	5608	5969	5073	4195	4488	4196
Hecw1	NM_001081348	94253	chr13	HECT, C2 and WW domain containing E3 ubiquitin protein ligase 1	1236	18.7506	0.21456	-0.026975	-0.265895	0.0089192	0.743838	0.00138752	0.176373	0.929181	0.024492	21.2971	22.1441	18.1031	18.5978	15.1468	16.2715	18.2872	20.1572	19.7072	0.199848	0.229028	-0.0557689	0.00123623	-0.285653	-0.246351	8597.76	8773.44	7201.57	7491.86	6140.65	6310.26	7049.6	7779.94	7626.78	8635	8726	7535	7611	6531	6383	6862	7377	7234
Hepacam	NM_175189	72927	chr9	hepatocyte cell adhesion molecule	7723	6.06833	-0.291167	-0.719243	-0.415546	0.0553005	3.38297e-06	0.00646409	0.441663	0.000328201	0.0739471	5.6063	6.76356	5.3508	3.8327	5.15101	6.30998	8.09067	7.44158	7.96176	-0.417602	-0.174249	-0.505997	-0.968503	-0.533569	-0.30511	738.799	874.73	694.832	503.982	681.66	798.792	1018.09	937.565	1005.8	742	870	727	512	725	808	991	889	954
Herc2	NM_010418	15204	chr7	hect (homologous to the E6-AP (UBE3A) carboxyl terminus) domain and RCC1 (CHC1)-like domain (RLD) 2	1139	12.3995	0.437422	0.0951772	0.0451515	4.68263e-05	0.379088	0.676848	0.00475964	0.737835	0.882858	16.443	13.5896	11.5343	12.1515	12.471	10.5821	11.0365	11.3882	12.0595	0.580472	0.278458	0.0477615	0.141063	0.187701	-0.113243	10768.4	8734.23	7443.37	7940.72	8201.65	6657.26	6901.66	7130.3	7570.9	10815	8687	7788	8067	8723	6734	6718	6761	7181
Hes5	NM_010419	15208	chr4	hairy and enhancer of split 5 (Drosophila)	12375	1.00674	-1.6802	0.415868	-0.309319	6.2579e-05	0.249236	0.409753	0.00593315	0.634859	0.736267	0.256596	0.452602	1.83895	1.19847	0.672153	1.19345	1.40611	1.03558	1.09321	-2.05845	-1.30808	0.676419	0.0841737	-0.724723	0.0243404	13.9385	24.1299	98.4455	64.9632	36.653	62.2834	72.9393	53.7953	56.9395	14	24	103	66	39	63	71	51	54
Hey2	NM_013904	15214	chr10	hairy/enhancer-of-split related with YRPW motif 2	5137	15.8684	-0.606753	-0.345313	-0.0987407	0.000893531	0.05621	0.582141	0.0399376	0.321639	0.841738	10.3667	14.0988	14.9545	14.306	12.4516	22.8201	18.4302	19.5193	19.8476	-0.829466	-0.413249	-0.322446	-0.368265	-0.559243	0.250262	1120.15	1495.08	1592.28	1542.47	1351.1	2368.7	1901.61	2016.44	2055.88	1125	1487	1666	1567	1437	2396	1851	1912	1950
Hibch	NM_146108	227095	chr1	3-hydroxyisobutyryl-Coenzyme A hydrolase	5706	20.369	0.0411704	-0.225613	-0.327037	0.691426	0.031293	0.00188632	0.951489	0.234281	0.0308189	21.7025	23.2742	18.2998	19.0327	16.0943	19.1055	22.3554	23.088	22.4441	0.00380033	0.0775448	-0.263281	-0.188564	-0.421126	-0.237855	1578.16	1660.98	1311.28	1381.04	1175.28	1334.62	1552.31	1605.14	1564.58	1585	1652	1372	1403	1250	1350	1511	1522	1484
Hif1a	NM_010431	15251	chr12	hypoxia inducible factor 1, alpha subunit	2055	24.8529	0.272954	0.394293	0.428902	0.0256845	0.0012316	0.000435412	0.302107	0.0282295	0.00975065	23.1163	26.059	25.7976	27.6022	30.9626	24.1002	18.7083	22.4772	22.0039	0.198143	0.343909	0.335212	0.450858	0.625767	0.200329	4696.66	5196.1	5164.86	5596.01	6317.42	4703.78	3629.59	4366.13	4285.72	4717	5168	5404	5685	6719	4758	3533	4140	4065
Hip1	NM_146001	215114	chr5	huntingtin interacting protein 1	3220	9.43146	-0.0795378	-0.197361	-0.332799	0.38272	0.0309167	0.00029364	0.851927	0.232725	0.00721985	10.0469	9.43887	9.00844	8.93852	8.24626	8.24418	11.0165	10.512	10.4707	-0.0221457	-0.139255	-0.200722	-0.193848	-0.300915	-0.365285	3367.41	3104.79	2975.24	2989.46	2775.56	2654.4	3525.83	3368.47	3364.26	3382	3088	3113	3037	2952	2685	3432	3194	3191
Hipk1	NM_010432	15257	chr3	homeodomain interacting protein kinase 1	1773	16.6521	0.0619229	0.466133	0.539954	0.572651	1.8134e-05	6.61588e-07	0.924086	0.00117058	4.13989e-05	13.9922	14.2418	18.3597	18.9632	21.9697	17.5839	13.0956	15.0102	13.9119	0.0626663	0.0610992	0.433294	0.498056	0.719535	0.334303	4806.18	4800.96	6214.28	6499.64	7578.27	5802.12	4295.3	4929.3	4580.92	4827	4775	6502	6603	8060	5869	4181	4674	4345
Hipk3	NM_010434	15259	chr2	homeodomain interacting protein kinase 3	1601	19.0807	-0.216379	0.176962	0.308279	0.0153668	0.0448477	0.000454895	0.230871	0.284619	0.00998995	14.682	16.218	20.2933	20.2357	22.6012	22.1948	17.3375	19.0832	19.3251	-0.275761	-0.159319	0.169879	0.183894	0.352559	0.262362	4696.66	5091.53	6396.83	6459.28	7260.47	6820.38	5295.93	5836.28	5926.2	4717	5064	6693	6562	7722	6899	5155	5534	5621
Hist2h2be	NM_178214	319190	chr3	histone cluster 2, H2be	11385	1.67902	-0.338995	-0.73193	-0.0217394	0.159845	0.0029665	0.926921	0.676744	0.0519241	0.975023	1.42594	1.65975	1.20672	1.13902	1.4498	2.45022	2.21486	1.88584	1.95894	-0.435814	-0.244953	-0.696098	-0.760765	-0.406105	0.283701	159.309	181.984	132.846	126.979	162.645	262.97	236.288	201.44	209.811	160	181	139	129	173	266	230	191	199
Hlf	NM_172563	217082	chr11	hepatic leukemia factor	9338	1.8725	-0.879215	-0.836408	-0.896083	0.000495074	0.000891924	0.000385771	0.0272945	0.022596	0.00890761	1.27265	1.78409	1.67702	1.46489	1.01469	2.05183	2.26075	3.45411	3.00704	-1.12537	-0.666369	-0.749608	-0.926125	-1.44502	-0.495886	307.666	423.289	399.501	353.378	246.322	476.509	521.895	798.345	696.893	309	421	418	359	262	482	508	757	661
Hmbox1	NM_177338	219150	chr14	homeobox containing 1	2852	29.9403	0.574834	0.335477	0.447765	0.00356768	0.0902354	0.0234639	0.0976027	0.409462	0.176817	38.4487	30.2071	19.6728	38.3846	33.5197	29.8665	24.712	24.7112	22.2719	0.75005	0.375013	-0.237624	0.744535	0.558248	0.327798	4809.17	3708.05	2424.72	4790.82	4210.36	3588.63	2951.54	2955.05	2670.54	4830	3688	2537	4867	4478	3630	2873	2802	2533
Hmgcr	NM_008255	15357	chr13	3-hydroxy-3-methylglutaryl-Coenzyme A reductase	1096	44.3577	0.234527	-0.0748861	0.342271	0.0484443	0.531611	0.00389388	0.412998	0.831597	0.052064	47.754	46.908	37.8065	38.5144	41.3785	61.9542	40.1155	40.4304	44.4571	0.260679	0.207819	-0.0974933	-0.0526178	0.0600402	0.578279	9027.9	8703.06	7042.91	7265.46	7855.63	11251.3	7241.71	7307.48	8056.93	9067	8656	7369	7381	8355	11381	7049	6929	7642
Hmox1	NM_010442	15368	chr8	heme oxygenase (decycling) 1	6157	19.4841	-0.0899637	0.057378	0.575918	0.415144	0.600544	8.68655e-08	0.862867	0.867117	6.55668e-06	16.4478	16.1924	17.147	18.9651	25.4061	26.8544	17.2285	17.6317	19.116	-0.0653913	-0.115003	-0.0266032	0.136775	0.567504	0.583449	1106.21	1068.78	1136.38	1272.76	1715.92	1735	1106.45	1133.72	1232.47	1111	1063	1189	1293	1825	1755	1077	1075	1169
Hnrnpa0	NM_029872	77134	chr13	heterogeneous nuclear ribonucleoprotein A0	1871	47.6522	0.104255	0.286857	0.157848	0.250427	0.00148071	0.0812535	0.762977	0.0320557	0.351743	43.8584	47.5832	52.8142	50.8413	49.3931	46.1956	45.2628	45.2692	41.5826	0.0582974	0.148802	0.305096	0.268294	0.235802	0.0752484	5012.29	5336.86	5947.62	5797.8	5668.66	5071.54	4939.44	4946.18	4555.62	5034	5308	6223	5890	6029	5130	4808	4690	4321
Hnrnpf	NM_133834	98758	chr6	heterogeneous nuclear ribonucleoprotein F	5280	17.4522	-0.00439454	0.0840719	0.283792	0.966127	0.414516	0.00553524	0.995873	0.764223	0.0662905	15.4861	16.7265	16.4658	17.7338	18.1447	21.5892	16.6445	16.8268	16.7083	-0.0470098	0.0370199	0.0202097	0.14528	0.187493	0.374131	1501.5	1591.61	1573.16	1715.71	1766.69	2010.82	1541.01	1559.79	1552.98	1508	1583	1646	1743	1879	2034	1500	1479	1473
Hnrnpll	NA	NA	NA	NA	4271	17.5728	0.167438	0.455291	0.112066	0.139943	5.19319e-05	0.323674	0.651396	0.00268565	0.668336	16.9902	17.3006	19.792	22.017	18.3646	14.825	15.6307	15.6618	16.1388	0.167832	0.166874	0.366731	0.538487	0.286091	-0.086661	2211.42	2209.95	2538.46	2859.53	2400.41	1853.63	1942.7	1948.95	2013.71	2221	2198	2656	2905	2553	1875	1891	1848	1910
Hoxa10	NM_008263	15395	chr6	homeobox A10	4489	23.0463	-0.142672	-0.101611	-0.294809	0.148194	0.301961	0.00295524	0.663558	0.675553	0.0429557	21.5072	23.218	22.9804	22.9769	19.8686	20.7229	25.5609	27.5354	23.589	-0.184855	-0.101551	-0.110538	-0.0926503	-0.29305	-0.296339	1983.41	2101.36	2088.31	2114.37	1840.03	1835.84	2250.9	2427.74	2085.4	1992	2090	2185	2148	1957	1857	2191	2302	1978
Hoxb3	NM_010458	15410	chr11	homeobox B3	10623	1.91674	-0.189992	-0.376214	-0.535483	0.27624	0.0326195	0.00259384	0.787018	0.239618	0.0388343	1.98906	1.99702	1.85042	1.65017	1.46912	1.70017	2.2608	2.41713	2.38708	-0.178991	-0.200228	-0.304008	-0.450551	-0.608353	-0.462262	287.753	283.534	263.785	238.21	213.425	236.276	312.314	334.319	331.053	289	282	276	242	227	239	304	317	314
Hoxd1	NM_010467	15429	chr2	homeobox D1	6827	13.5046	0.0214558	0.0583202	-0.363328	0.857682	0.625088	0.00279971	0.982172	0.877069	0.0413189	14.0092	14.1436	15.8193	13.0477	10.3572	11.4101	15.3811	13.8684	13.8407	0.0281562	0.0148711	0.18211	-0.0774324	-0.401065	-0.32549	1113.18	1102.96	1238.65	1034.55	826.458	870.96	1167.06	1053.57	1054.3	1118	1097	1296	1051	879	881	1136	999	1000
Hp	NM_017370	15439	chr8	haptoglobin	11948	2.278	-0.531648	1.54351	0.601182	0.286711	0.00110621	0.20903	0.793789	0.0264074	0.559287	0.693885	1.26727	6.57338	1.70147	2.36525	1.95433	1.612	2.05637	0.728114	-0.995936	-0.169737	2.19491	0.273856	0.754183	0.417588	39.8263	71.3853	371.804	97.4431	136.334	107.756	88.3514	112.831	40.0858	40	71	389	99	145	109	86	107	38
Hpdl	NM_146256	242642	chr4	4-hydroxyphenylpyruvate dioxygenase-like	12270	1.01999	-1.02672	-1.1814	-0.337506	0.00743482	0.00225843	0.358469	0.155078	0.0428246	0.698745	0.684519	0.749275	0.723551	0.562748	0.62998	1.73113	1.4006	1.67808	1.46392	-1.06532	-0.964063	-1.00773	-1.34453	-1.17729	0.197463	46.7968	50.2722	48.7434	38.3868	43.2275	113.693	91.437	109.681	95.9469	47	50	51	39	46	115	89	104	91
Hpgd	NM_008278	15446	chr8	hydroxyprostaglandin dehydrogenase 15 (NAD)	11097	3.04133	-0.479834	-0.511654	-0.932212	0.0264021	0.0179298	2.61437e-05	0.305381	0.170122	0.00100984	2.49742	3.22604	2.81621	2.77015	1.74854	2.48308	4.45847	4.33069	3.5981	-0.65819	-0.317594	-0.506907	-0.512538	-1.16322	-0.724069	183.206	232.256	203.571	202.774	128.8	174.983	312.312	303.734	253.041	184	231	213	206	137	177	304	288	240
Hr	NM_021877	15460	chr14	hairless	7884	3.31998	-0.41859	-0.0900958	0.319443	0.00107283	0.473282	0.00965923	0.0456654	0.80053	0.100247	2.58535	2.41949	3.35515	2.92794	4.11445	4.3115	3.49653	3.34946	3.55079	-0.358131	-0.480651	-0.00386229	-0.181994	0.317395	0.320856	605.378	556.007	774.155	684.119	967.494	969.82	781.807	749.842	797.051	608	553	810	695	1029	981	761	711	756
Hs1bp3	NM_021429	58240	chr12	HCLS1 binding protein 3	7834	6.16639	-0.53666	-0.33112	-0.105213	7.72167e-05	0.0136028	0.428197	0.00685367	0.142459	0.747273	4.8194	5.01561	5.65511	5.67349	6.0746	7.32918	8.12237	6.64135	7.39686	-0.551181	-0.520735	-0.342035	-0.319264	-0.211677	-0.00507745	608.364	621.361	703.427	714.634	770.042	888.755	979.054	801.521	895.102	611	618	736	726	819	899	953	760	849
Hs2st1	NM_011828	23908	chr3	heparan sulfate 2-O-sulfotransferase 1	2452	20.8556	0.157487	0.38895	0.556323	0.0901353	2.52198e-05	1.46457e-09	0.544585	0.00153217	1.66628e-07	18.7198	19.0318	20.6352	23.6253	25.0043	25.1881	17.1356	17.5048	17.9398	0.159046	0.15581	0.278326	0.49162	0.582639	0.529185	3843.35	3834.74	4174.71	4840.03	5155.29	4967.74	3359.4	3435.96	3530.84	3860	3814	4368	4917	5483	5025	3270	3258	3349
Hs3st1	NM_010474	15476	chr5	heparan sulfate (glucosamine) 3-O-sulfotransferase 1	8933	7.65829	-0.119819	-0.309411	-0.49029	0.424748	0.0408385	0.00132222	0.868281	0.270563	0.0235721	8.10039	7.92152	7.04097	6.99652	5.76814	6.75517	10.3537	8.32992	8.36614	-0.0901443	-0.149332	-0.313188	-0.304217	-0.572991	-0.40948	582.477	559.024	498.897	502.015	416.515	466.621	710.917	572.667	576.707	585	556	522	510	443	472	692	543	547
Hs6st1	NM_015818	50785	chr1	heparan sulfate 6-O-sulfotransferase 1	1814	34.874	0.121338	0.294131	0.239139	0.234886	0.00382429	0.0188362	0.750952	0.0624003	0.152975	35.6409	31.1849	36.0996	39.1896	39.042	34.0105	31.6644	32.1599	31.6824	0.226979	0.00725613	0.224198	0.360781	0.364531	0.1015	5656.5	4857.27	5645.61	6206.3	6222.46	5185.23	4798.7	4879.74	4820.25	5681	4831	5907	6305	6618	5245	4671	4627	4572
Hsbp1l1	NM_001136181	66255	chr18	heat shock factor binding protein 1-like 1	5084	32.9079	-0.115635	-0.104555	-0.421295	0.265483	0.313397	6.09948e-05	0.777465	0.686052	0.00198789	31.2457	35.4258	36.0964	31.0119	26.5973	27.7914	37.3837	37.7108	37.0631	-0.194591	-0.0406172	-0.00773143	-0.208534	-0.420745	-0.421416	1670.76	1859.05	1901.94	1654.68	1428.21	1427.54	1908.8	1927.85	1899.85	1678	1849	1990	1681	1519	1444	1858	1828	1802
Hsd17b11	NM_053262	114664	chr5	hydroxysteroid (17-beta) dehydrogenase 11	2552	54.2957	-0.181093	-0.226027	-0.38586	0.057564	0.0179028	5.84402e-05	0.450822	0.170122	0.00191461	51.2643	58.1306	52.7467	53.13	46.8367	48.8695	60.6604	62.7279	69.1687	-0.260242	-0.106017	-0.240351	-0.211795	-0.384443	-0.387175	3716.9	4136.37	3768.52	3843.87	3410.22	3403.76	4199.76	4348.21	4807.59	3733	4114	3943	3905	3627	3443	4088	4123	4560
Hsd17b7	NM_010476	15490	chr1	hydroxysteroid (17-beta) dehydrogenase 7	2366	22.6682	0.18233	0.0398324	0.54995	0.20291	0.781582	0.000109554	0.727284	0.944092	0.00323365	20.3019	23.97	20.487	19.5581	22.1028	35.7618	18.5141	20.6497	21.3992	0.0721229	0.28461	0.0639897	0.0151757	0.200784	0.830831	3962.83	4591.83	3940.55	3809.42	4332.58	6705.71	3450.83	3853.59	4004.22	3980	4567	4123	3870	4608	6783	3359	3654	3798
Hspa13	NR_027492	110920	chr16	heat shock protein 70 family, member 13	4542	12.1748	0.211558	0.347327	0.147853	0.0805232	0.00396201	0.222505	0.520068	0.0642287	0.574151	11.4564	13.217	12.3117	14.7396	11.793	12.0013	9.62541	12.2536	11.2025	0.119066	0.298138	0.201664	0.479333	0.166886	0.128147	1987.39	2250.17	2104.55	2551.43	2054.4	1999.95	1594.43	2032.26	1862.94	1996	2238	2202	2592	2185	2023	1552	1927	1767
Hspa1a	NM_010479	193740	chr17	heat shock protein 1A	11008	1.78652	-1.16439	-0.949311	0.0290542	9.36303e-05	0.00124935	0.91788	0.00808127	0.0283768	0.970696	1.1174	1.14972	1.64896	0.98313	2.2818	2.96486	1.89217	2.25415	3.74873	-1.16646	-1.1525	-0.629591	-1.35282	-0.135909	0.176882	133.422	134.729	194.022	117.133	273.598	340.08	215.749	257.338	429.084	134	134	203	119	291	344	210	244	407
Hspa1b	NM_010478	15511	chr17	heat shock protein 1B	9413	3.64963	-0.816214	-0.652331	0.271519	0.000660056	0.00603991	0.237206	0.0337556	0.0852505	0.587998	2.49925	2.52028	3.17869	2.44322	4.04441	6.77977	4.18985	3.54156	5.99804	-0.807018	-0.821954	-0.482279	-0.842737	-0.108395	0.571816	299.701	296.604	375.61	292.348	487.025	780.999	479.771	406.043	689.5	301	295	393	297	518	790	467	385	654
Hspa4	NM_008300	15525	chr11	heat shock protein 4	669	59.6237	0.250794	0.0627076	0.0877331	0.00123147	0.421099	0.260014	0.0498128	0.768454	0.609006	66.0936	64.9528	59.2202	55.7324	59.7054	58.2979	56.6104	56.3772	58.13	0.27663	0.224435	0.0969938	0.0275428	0.136073	0.0376333	13087.3	12622.3	11555	11011.9	11872.3	11089.2	10703.8	10672.8	11034.3	13144	12554	12090	11187	12627	11217	10419	10120	10466
Hspa5	NM_022310	14828	chr2	heat shock protein 5	550	120.423	0.0330295	0.172135	0.492858	0.755516	0.103487	2.73631e-06	0.962765	0.438007	0.000150859	106.367	108.104	114.231	121.668	123.872	174.707	109.093	105.342	111.193	0.0348818	0.0311699	0.116547	0.225654	0.260748	0.692778	11874.6	11844	12566.2	13553.5	13887.2	18736	11629.5	11243.3	11899.8	11926	11780	13148	13769	14770	18952	11320	10661	11287
Hspb1	NM_013560	15507	chr5	heat shock protein 1	1290	193.272	-0.152698	-0.130618	0.368863	0.169898	0.23997	0.000784753	0.686601	0.625628	0.0155892	171.462	160.524	184.391	152.698	223.455	258.058	218.913	176.677	178.002	-0.0928586	-0.215024	-0.00921946	-0.26315	0.295263	0.438932	6607.38	6070.83	7001.82	5871.62	8647.31	9552.89	8055.36	6509.13	6575.65	6636	6038	7326	5965	9197	9663	7841	6172	6237
Hspg2	NM_008305	15530	chr4	perlecan (heparan sulfate proteoglycan 2)	5311	2.69856	-0.141515	-0.725557	-0.235859	0.327051	8.86531e-07	0.103307	0.825109	0.000107718	0.396526	2.96236	2.79404	2.23801	1.60281	2.29039	3.169	3.4979	3.03396	3.33572	-0.0867984	-0.198206	-0.512278	-0.975378	-0.451653	-0.0474878	1792.24	1658.97	1334.23	967.609	1391.53	1841.77	2020.78	1754.9	1934.64	1800	1650	1396	983	1480	1863	1967	1664	1835
Htr1d	NM_008309	15552	chr4	5-hydroxytryptamine (serotonin) receptor 1D	4412	17.4621	0.058531	-0.146506	-0.265759	0.527777	0.116562	0.00460834	0.91143	0.462517	0.0583148	19.1021	18.8288	16.1684	16.7068	15.0491	15.5128	19.487	18.842	18.2625	0.0822581	0.0344098	-0.17941	-0.114066	-0.255556	-0.275793	2369.74	2292.4	1976.48	2068.11	1874.82	1848.69	2308.43	2234.75	2171.86	2380	2280	2068	2101	1994	1870	2247	2119	2060
Htr3b	NM_020274	57014	chr9	5-hydroxytryptamine (serotonin) receptor 3B	7176	9.36854	0.0115724	-0.0181492	-0.480765	0.93125	0.892405	0.000443063	0.989608	0.971507	0.00981404	9.51276	10.7438	8.76693	11.0354	7.74398	6.7415	10.1115	10.2924	10.796	-0.0645242	0.0838229	-0.203408	0.146374	-0.354904	-0.618579	978.76	1084.87	888.839	1132.98	800.137	666.318	993.439	1012.44	1064.84	983	1079	930	1151	851	674	967	960	1010
Htra1	NM_019564	56213	chr7	HtrA serine peptidase 1	1418	79.2155	0.0382573	0.402547	0.306515	0.743801	0.000525891	0.00840578	0.959997	0.0153976	0.0907811	74.9962	64.8618	90.7783	89.2215	95.9151	73.5525	73.4441	70.9543	67.3545	0.151653	-0.0848343	0.405918	0.399079	0.512627	0.0656739	6525.73	5538.95	7783.62	7746.8	8381.23	6148.13	6102.39	5902.72	5618.35	6554	5509	8144	7870	8914	6219	5940	5597	5329
I730030J21Rik	NA	NA	NA	NA	12410	1.6281	-0.0611072	-1.46589	-0.257893	0.879974	0.00100923	0.527818	0.983169	0.0245253	0.812962	1.57213	2.35288	0.835333	0.637193	0.940755	2.54818	2.27786	1.86048	2.2101	-0.357537	0.186801	-1.26201	-1.6171	-1.07223	0.269787	43.8093	64.3476	22.9383	17.7155	26.3038	68.2168	60.6138	49.5768	59.0433	44	64	24	18	28	69	59	47	56
I830012O16Rik	NM_001005858	667370	chr19	RIKEN cDNA I830012O16 gene	10934	2.86109	-0.269081	-0.883975	-0.428334	0.31298	0.00127658	0.11034	0.81314	0.0287889	0.410493	2.05154	3.85205	2.30329	1.53877	2.2561	3.07881	3.51925	4.28888	3.21342	-0.77296	0.105163	-0.62795	-1.1883	-0.630594	-0.247724	176.235	324.755	194.976	131.899	194.617	254.072	288.685	352.241	264.638	177	323	204	134	207	257	281	334	251
Iars	NM_172015	105148	chr13	isoleucine-tRNA synthetase	1920	28.4804	0.214531	0.171544	0.414384	0.0206291	0.064392	6.99926e-06	0.269774	0.345865	0.000332939	29.1118	27.5619	25.5147	29.4366	31.3076	34.4231	25.5034	24.9845	25.4138	0.266506	0.160519	0.0550435	0.279396	0.377473	0.450299	5461.34	5074.44	4716.62	5510.37	5898.07	6203.49	4568.58	4481.09	4570.38	5485	5047	4935	5598	6273	6275	4447	4249	4335
Ica1l	NM_027407	70375	chr1	islet cell autoantigen 1-like	7430	5.75914	0.0723553	0.044481	-0.365225	0.538257	0.705171	0.00231371	0.915795	0.913626	0.0358811	5.84896	6.59693	5.82211	6.3648	4.61636	4.64469	6.21638	5.96293	6.19926	-0.00269691	0.143688	-0.0305398	0.116003	-0.337631	-0.392753	911.053	1008.45	893.62	989.267	722.094	694.988	924.606	887.997	925.676	915	1003	935	1005	768	703	900	842	878
Id3	NM_008321	15903	chr4	inhibitor of DNA binding 3	4699	48.3659	-0.546803	0.233961	0.125872	1.54533e-05	0.0571332	0.307514	0.00210216	0.324126	0.654039	30.1136	36.854	60.1231	54.7458	57.9228	49.4201	52.7497	44.9981	54.0848	-0.684531	-0.420397	0.291167	0.174162	0.2647	-0.0282274	1224.69	1470.95	2409.44	2221.67	2365.62	1930.74	2048.51	1749.63	2108.59	1230	1463	2521	2257	2516	1953	1994	1659	2000
Id4	NM_031166	15904	chr13	inhibitor of DNA binding 4	4986	25.0573	0.0673456	-0.265608	-0.426639	0.614504	0.0493354	0.0016988	0.934141	0.298999	0.0286253	26.2695	32.2356	24.4121	21.9602	18.1862	23.7958	27.6257	25.9734	33.0526	-0.0729296	0.195128	-0.19988	-0.334387	-0.597062	-0.273444	1860.94	2241.12	1704.1	1552.31	1293.75	1619.33	1868.73	1759.12	2244.59	1869	2229	1783	1577	1376	1638	1819	1668	2129
Ier2	NM_010499	15936	chr8	immediate early response 2	10321	5.34954	2.29887	0.376284	1.16723	4.32866e-20	0.145234	3.68541e-06	1.35433e-16	0.507763	0.000193794	11.9419	10.0475	3.52419	2.27818	6.41471	3.64424	2.5509	2.39467	1.99804	2.42341	2.14753	0.646059	0.0380654	1.53453	0.657572	775.64	640.464	225.56	147.648	418.413	227.376	158.21	148.705	124.417	779	637	236	150	445	230	154	141	118
Ier3	NM_133662	15937	chr17	immediate early response 3	6880	23.4776	0.530205	0.644818	0.738631	0.000338148	1.21626e-05	5.10519e-07	0.0213733	0.000861293	3.24322e-05	22.3472	25.086	29.7341	21.589	30.0715	25.0446	18.2258	15.7227	17.0469	0.458325	0.597903	0.84879	0.405462	0.892349	0.564678	1039.5	1145.19	1362.9	1002.06	1404.71	1119.1	809.543	699.222	760.152	1044	1139	1426	1018	1494	1132	788	663	721
Ifi30	NM_023065	65972	chr8	interferon gamma inducible protein 30	10599	6.95709	-0.663278	-0.386424	-0.276819	0.00274566	0.0762584	0.201622	0.0833501	0.377372	0.550818	4.80433	5.55508	6.85779	5.67884	7.00014	6.63726	8.58352	10.5398	6.35747	-0.754684	-0.573131	-0.264567	-0.51763	-0.207823	-0.348143	201.128	228.234	282.901	237.225	294.29	266.922	343.133	421.843	255.154	202	227	296	241	313	270	334	400	242
Ifit1	NM_008331	15957	chr19	interferon-induced protein with tetratricopeptide repeats 1	6685	10.334	-0.0592132	0.0905985	1.17905	0.781276	0.669432	1.54457e-08	0.966746	0.898303	1.46441e-06	5.09446	9.57358	9.72704	6.50191	17.7314	17.049	8.37177	8.62281	6.6822	-0.566344	0.31556	0.34433	-0.218064	1.23725	1.11666	573.515	1057.72	1079.04	730.381	2004.57	1843.75	899.949	928.067	721.149	576	1052	1129	742	2132	1865	876	880	684
Ifit2	NM_008332	15958	chr19	interferon-induced protein with tetratricopeptide repeats 2	5185	10.364	0.0129239	0.133323	0.324196	0.91701	0.280184	0.0082706	0.985159	0.661604	0.0898197	8.07074	10.9608	10.7683	9.87506	11.1949	12.6164	9.11652	10.3094	9.83477	-0.209013	0.205223	0.185524	0.0787705	0.268831	0.377217	1360.11	1812.8	1788.2	1660.59	1894.56	2042.46	1467.04	1661.03	1588.83	1366	1803	1871	1687	2015	2066	1428	1575	1507
Ifitm1	NM_026820	68713	chr7	interferon induced transmembrane protein 1	12143	3.31186	-0.543983	0.201782	0.968615	0.0772292	0.489272	0.000578126	0.511751	0.807921	0.0120517	1.51864	2.16629	3.22765	2.94079	5.45248	5.137	2.61059	3.44141	2.2874	-0.794097	-0.317937	0.255443	0.14059	1.03266	0.88365	43.8093	61.3314	91.7495	84.652	157.956	142.358	71.9173	94.9104	63.2694	44	61	96	86	168	144	70	90	60
Ifitm2	NM_030694	80876	chr7	interferon induced transmembrane protein 2	6965	39.2797	-0.185799	0.0335947	0.477056	0.142909	0.788918	0.000112531	0.655369	0.946591	0.0032982	28.4671	34.6126	36.2851	37.015	52.1375	48.3846	39.2839	38.0518	34.033	-0.318377	-0.0637611	0.0100816	0.0568894	0.559864	0.38819	761.7	908.915	956.701	988.283	1400.94	1243.66	1003.71	973.419	872.965	765	904	1001	1004	1490	1258	977	923	828
Ifitm3	NM_025378	66141	chr7	interferon induced transmembrane protein 3	6024	50.5549	-0.411962	-0.378262	0.596308	0.014418	0.0244042	0.000265696	0.223832	0.204156	0.00662388	32.6575	40.0113	38.336	35.9225	58.3706	89.6139	54.04	55.4872	40.5661	-0.550494	-0.284846	-0.340655	-0.416275	0.292698	0.846879	903.088	1085.87	1044.63	991.235	1620.95	2380.56	1426.97	1466.98	1075.39	907	1080	1093	1007	1724	2408	1389	1391	1020
Ifrd1	NM_013562	15982	chr12	interferon-related developmental regulator 1	6250	16.7534	0.172743	0.583563	1.14543	0.160461	1.48692e-06	1.12131e-21	0.677856	0.000166553	5.01186e-19	12.3597	13.5633	17.7344	16.6878	25.6125	25.6691	10.2593	12.1415	13.3114	0.117949	0.224823	0.617177	0.547592	1.17445	1.11363	957.851	1031.58	1354.29	1290.48	1993.29	1910.97	759.208	899.596	988.929	962	1026	1417	1311	2120	1933	739	853	938
Ift122	NM_031177	81896	chr6	intraflagellar transport 122 homolog (Chlamydomonas)	3884	14.58	-0.0585603	-0.385526	-0.409562	0.569093	0.000210826	8.38075e-05	0.922446	0.00801972	0.00258975	14.6635	16.8644	12.6074	12.4873	11.3664	13.5964	17.9706	17.0842	15.9241	-0.14842	0.0261876	-0.387501	-0.3832	-0.509637	-0.315301	2544.98	2872.53	2156.17	2162.61	1981.06	2266.87	2978.25	2834.83	2649.45	2556	2857	2256	2197	2107	2293	2899	2688	2513
Ift43	NA	NA	NA	NA	11154	6.44172	-0.367118	-0.564765	-0.351624	0.0657844	0.00508762	0.077108	0.479494	0.0768053	0.344645	5.68264	6.52761	5.50627	5.12364	5.48494	6.99221	8.12206	8.09441	8.23622	-0.454245	-0.282185	-0.520616	-0.605909	-0.499079	-0.214176	188.184	212.147	179.678	169.306	182.395	222.436	256.837	256.278	261.47	189	211	188	172	194	225	250	243	248
Igfbp3	NM_008343	16009	chr11	insulin-like growth factor binding protein 3	7066	10.1679	0.0942211	0.879447	1.64423	0.480702	1.18733e-11	9.47743e-38	0.889254	6.19142e-09	1.48263e-34	5.84731	6.33102	11.0662	9.90143	16.046	19.9974	6.60727	5.54659	5.56164	0.0499681	0.137418	0.947955	0.805754	1.51091	1.76434	609.36	647.502	1136.38	1029.62	1679.25	2001.92	657.496	552.629	555.621	612	644	1189	1046	1786	2025	640	524	527
Igfbp4	NM_010517	16010	chr11	insulin-like growth factor binding protein 4	2123	54.8948	-0.0725856	-0.472702	-0.121561	0.550889	0.000125187	0.318422	0.918772	0.00534716	0.663511	53.2478	60.4817	36.9523	49.0291	50.2299	60.802	64.3817	64.034	57.2933	-0.153014	0.00365387	-0.701162	-0.275181	-0.231092	-0.0195909	4694.66	5233.3	3210.35	4313.41	4447.29	5149.64	5420.24	5397.55	4842.39	4715	5205	3359	4382	4730	5209	5276	5118	4593
Igfbp5	NM_010518	16011	chr1	insulin-like growth factor binding protein 5	2884	14.4913	-0.242352	-0.917045	-0.259525	0.261407	3.30238e-05	0.229303	0.771811	0.0018786	0.580096	13.316	15.9198	7.85425	10.4128	10.0329	19.2832	16.658	22.4532	14.5806	-0.362159	-0.131644	-1.1447	-0.719945	-0.764367	0.113958	3326.59	3903.11	1933.47	2595.72	2516.98	4627.66	3973.75	5362.74	3491.84	3341	3882	2023	2637	2677	4681	3868	5085	3312
Iglon5	NM_001164518	210094	chr7	IgLON family member 5	6029	12.3364	-0.113134	-0.419176	-0.3376	0.375551	0.00117191	0.00870789	0.850546	0.0272611	0.0929706	14.0155	11.7275	10.7841	10.0406	10.4613	11.8087	16.4504	13.4027	13.4429	0.0220281	-0.261973	-0.377025	-0.461885	-0.393541	-0.282869	1535.35	1260.82	1164.1	1097.54	1150.84	1242.68	1720.79	1403.71	1411.71	1542	1254	1218	1115	1224	1257	1675	1331	1339
Igsf11	NM_170599	207683	chr16	immunoglobulin superfamily, member 11	6629	7.78434	-0.378245	0.135482	-0.0268968	0.00248873	0.267899	0.826926	0.0782502	0.653176	0.938495	6.11334	6.17055	8.91269	8.6109	7.07962	8.76408	9.19916	7.42434	8.18008	-0.370987	-0.38461	0.151189	0.119636	-0.153433	0.0902645	890.144	881.769	1278.79	1251.1	1035.19	1225.87	1279.04	1033.54	1141.81	894	877	1338	1271	1101	1240	1245	980	1083
Igsf3	NM_207205	78908	chr3	immunoglobulin superfamily, member 3	3021	11.0766	0.455329	0.208523	0.0698742	1.67216e-06	0.0292208	0.466774	0.000418541	0.224769	0.773733	13.6076	12.6584	10.4896	11.6274	10.2785	9.99817	9.74729	10.2055	9.81985	0.519369	0.388004	0.122792	0.289424	0.120766	0.0168828	4256.56	3886.02	3233.29	3629.28	3228.75	3004.37	2911.48	3052.08	2944.65	4275	3865	3383	3687	3434	3039	2834	2894	2793
Igtp	NM_018738	16145	chr11	interferon gamma induced GTPase	6744	12.7618	-0.147904	-0.685976	0.0432172	0.474105	0.00112798	0.833332	0.887135	0.026585	0.941018	8.28092	16.9697	8.93167	8.3871	14.4566	14.5193	14.2193	16.3296	12.7774	-0.737352	0.269654	-0.649563	-0.722104	0.071726	0.0139899	714.902	1437.77	759.818	722.509	1253.33	1204.12	1172.2	1347.8	1057.47	718	1430	795	734	1333	1218	1141	1278	1003
Ikbip	NM_027078	67454	chr10	IKBKB interacting protein	8473	4.55299	-0.121529	-0.444821	-0.373809	0.452679	0.00667542	0.0221795	0.879078	0.0913269	0.170084	4.16974	5.59739	4.00589	3.78274	3.46879	4.82159	5.22674	5.35105	5.90578	-0.33353	0.0635895	-0.41246	-0.476911	-0.592517	-0.182173	578.493	762.121	547.641	523.671	483.268	642.593	692.429	709.766	785.452	581	758	573	532	514	650	674	673	745
Il13ra1	NM_133990	16164	chrX	interleukin 13 receptor, alpha 1	8080	4.72076	0.00874998	0.176501	0.453592	0.94703	0.17633	0.000441954	0.991391	0.551253	0.00981404	3.99523	4.36487	4.49009	4.88666	5.51322	5.96831	4.00227	4.54546	4.35701	-0.0424622	0.0579647	0.104543	0.24458	0.427588	0.477937	628.278	673.643	695.78	766.805	870.649	901.607	600.997	683.397	656.83	631	670	728	779	926	912	585	648	623
Il16	NM_010551	16170	chr7	interleukin 16	9612	1.98797	-0.881299	0.0205334	-0.0716185	6.40753e-06	0.912375	0.702102	0.00104143	0.976346	0.893816	0.96807	1.49651	2.56482	2.02942	2.27357	2.06883	2.24872	2.25381	2.53633	-1.20925	-0.610278	0.170898	-0.148118	0.024593	-0.175143	206.106	312.691	538.087	431.141	486.098	423.121	457.169	458.767	517.66	207	311	563	438	517	428	445	435	491
Il1r1	NM_008362	16177	chr1	interleukin 1 receptor, type I	8385	3.43118	0.161968	0.898081	1.2651	0.369152	3.50949e-07	5.22807e-13	0.848316	4.93497e-05	1.18962e-10	2.24998	2.52276	3.88952	4.04859	6.20831	4.07605	2.02155	2.4327	2.16982	0.0910375	0.228761	0.858171	0.934026	1.55939	0.888997	455.028	500.708	775.108	817.006	1260.86	791.869	390.393	470.361	420.669	457	498	811	830	1341	801	380	446	399
Il1r2	NM_010555	16178	chr1	interleukin 1 receptor, type II	12324	1.17308	0.0824551	1.27974	1.35691	0.850281	0.00204041	0.00104451	0.982172	0.0397134	0.0196264	0.729122	0.6609	1.48814	1.70274	2.51393	0.84332	0.600259	0.846241	0.594429	0.160016	-0.00458025	1.15093	1.36116	1.92785	0.308476	41.8187	37.2019	84.0997	97.4498	144.816	46.4596	32.8795	46.3978	32.6927	42	37	88	99	154	47	32	44	31
Il1rap	NM_134103	16180	chr16	interleukin 1 receptor accessory protein	10267	1.81564	-0.313978	0.758867	0.350091	0.0828899	9.76018e-06	0.0446046	0.527135	0.000749379	0.256303	1.15039	1.29481	2.30437	2.83063	1.91973	1.98728	1.48814	1.54973	1.6823	-0.386173	-0.243274	0.591478	0.9057	0.355935	0.341858	212.081	234.267	418.611	520.719	355.403	351.942	261.975	273.152	297.313	213	233	438	529	378	356	255	259	282
Il31ra	NM_139299	218624	chr13	interleukin 31 receptor A	6134	8.48393	0.231207	0.640535	0.229116	0.130964	2.36226e-05	0.134249	0.631213	0.00147083	0.453108	8.12291	8.10261	8.43936	13.0642	8.2603	8.07352	6.83196	6.97665	7.66537	0.246232	0.215569	0.280102	0.928241	0.276485	0.179538	1271.49	1244.73	1301.72	2040.55	1298.46	1214.01	1021.18	1044.08	1150.24	1277	1238	1362	2073	1381	1228	994	990	1091
Il4ra	NM_001008700	16190	chr7	interleukin 4 receptor, alpha	4789	9.106	0.193997	0.257251	0.859947	0.11944	0.0384636	2.3485e-12	0.609069	0.260765	4.74057e-10	9.03687	6.96074	8.02218	8.69458	13.6402	11.9488	7.35936	7.1853	7.20931	0.381495	-0.0219301	0.188537	0.322705	0.981295	0.72636	1964.49	1485.03	1718.43	1886.01	2977.72	2495.24	1527.65	1493.35	1502.38	1973	1477	1798	1916	3167	2524	1487	1416	1425
Il6	NM_031168	16193	chr5	interleukin 6	12387	1.26593	0.0598288	2.4841	4.47535	0.916654	5.00849e-08	2.50322e-25	0.985159	1.02756e-05	1.20492e-22	0.19318	0.154597	1.23363	0.659241	4.31932	3.26123	0.115965	0.19024	0.213379	0.197089	-0.112219	2.72365	1.85852	4.5405	4.07379	8.96115	7.03894	56.3957	30.5101	201.212	145.323	5.14428	8.43828	9.48503	9	7	59	31	214	147	5	8	9
Il6st	NM_010560	16195	chr13	interleukin 6 signal transducer	394	72.3669	0.155886	0.162402	0.32044	0.0880594	0.0754904	0.000433715	0.540672	0.375339	0.00974496	72.8844	68.9204	64.3405	77.9294	79.433	80.9183	66.4121	68.0973	63.294	0.208744	0.100993	0.00764485	0.302186	0.338947	0.301647	16957.5	15737.1	14751	18092.3	18559.2	18085.5	14754.6	15147.5	14117	17031	15652	15434	18380	19739	18294	14362	14363	13390
Ing5	NM_025454	66262	chr1	inhibitor of growth family, member 5	9432	2.32563	-0.629099	0.0497194	-0.169861	4.73812e-05	0.738193	0.258438	0.00475964	0.926403	0.608174	1.67611	1.70343	2.65444	2.75069	2.3013	2.38603	2.66664	2.4664	2.98716	-0.625902	-0.62964	0.014554	0.0839315	-0.16372	-0.17555	324.594	323.751	506.542	531.546	447.546	443.882	493.125	456.659	554.56	326	322	530	540	476	449	480	433	526
Inpp5f	NM_178641	101490	chr7	inositol polyphosphate-5-phosphatase F	1883	26.6558	0.144604	0.276694	0.0844577	0.162801	0.00736573	0.415528	0.679378	0.097136	0.741351	25.3599	27.9775	29.4937	28.8803	28.1236	23.3319	23.8599	26.2197	24.8471	0.0861197	0.200738	0.282711	0.270511	0.241405	-0.092039	5129.78	5554.03	5878.81	5829.3	5712.85	4533.74	4608.64	5070.62	4818.14	5152	5524	6151	5922	6076	4586	4486	4808	4570
Insc	NM_173767	233752	chr7	inscuteable homolog (Drosophila)	9758	4.04771	-0.457984	-0.704481	-0.202623	0.0394539	0.00172205	0.356675	0.37411	0.0353882	0.69662	3.8099	3.42363	3.74067	2.3604	3.299	5.46518	5.58311	4.69979	5.16316	-0.369428	-0.550222	-0.416969	-1.06094	-0.570568	0.0920951	377.365	332.8	365.1	233.286	328.126	520.007	528.052	445.059	490.252	379	331	382	237	349	526	514	422	465
Insig1	NM_153526	231070	chr5	insulin induced gene 1	1534	56.2261	0.132343	-0.0901197	0.27413	0.210418	0.396455	0.00923242	0.730548	0.752148	0.0968514	58.0214	57.2155	49.9107	48.781	54.2777	74.3952	51.4881	55.7194	56.1365	0.155732	0.108483	-0.0826936	-0.0976038	0.0656005	0.456368	6556.6	6345.31	5557.68	5500.53	6159.45	8075.91	5555.85	6019.78	6081.18	6585	6311	5815	5588	6551	8169	5408	5708	5768
Insr	NM_010568	16337	chr8	insulin receptor	5325	4.18767	0.100161	0.373781	0.0970031	0.413828	0.00209391	0.428358	0.861596	0.0405655	0.747273	3.75106	4.29325	4.7837	4.92465	4.38326	3.68884	3.46565	4.21097	3.97521	0.0137948	0.181381	0.343194	0.403177	0.24444	-0.06823	1497.51	1682.1	1881.87	1961.8	1757.29	1414.69	1321.16	1607.24	1521.35	1504	1673	1969	1993	1869	1431	1286	1524	1443
Ints10	NM_027590	70885	chr8	integrator complex subunit 10	6142	7.17559	0.400698	-0.040084	-0.223644	0.000156787	0.709709	0.0393718	0.0117149	0.915797	0.242709	8.90963	9.22344	6.4057	6.93641	5.61953	6.25568	6.79321	7.26111	7.28152	0.388911	0.411759	-0.107969	0.0248757	-0.26942	-0.178809	1626.95	1652.94	1152.63	1263.9	1030.49	1097.35	1184.52	1267.66	1274.65	1634	1644	1206	1284	1096	1110	1153	1202	1209
Ints6	NM_008715	18130	chr14	integrator complex subunit 6	9362	2.16893	-0.606657	-0.249319	0.0114422	0.000483035	0.143513	0.94585	0.0269874	0.505364	0.981128	1.42382	1.82524	1.9463	2.20614	2.14657	2.895	2.44139	2.46696	2.76896	-0.779915	-0.449635	-0.351412	-0.152933	-0.183204	0.183631	303.684	382.066	409.055	469.533	459.763	593.163	497.235	503.061	566.158	305	380	428	477	489	600	484	477	537
Ipmk	NM_027184	69718	chr10	inositol polyphosphate multikinase	4281	9.76982	-0.0161176	0.28903	0.204374	0.880874	0.00662352	0.0554289	0.983169	0.0910916	0.289551	8.98474	8.67736	11.1018	10.7067	11.0529	9.6693	8.4843	9.48156	9.78618	0.0219061	-0.0553551	0.305794	0.271642	0.326732	0.0698684	2077	1968.65	2528.91	2469.72	2565.89	2147.25	1872.84	2095.54	2168.69	2086	1958	2646	2509	2729	2172	1823	1987	2057
Ipo7	NM_181517	233726	chr7	importin 7	2307	34.0346	0.221886	0.164178	0.252054	0.0127975	0.0657964	0.00463267	0.212572	0.348782	0.0585013	34.2156	36.2065	32.6228	34.9446	35.074	37.4767	29.6351	32.1016	32.0468	0.194298	0.248803	0.104312	0.221595	0.236117	0.267672	4551.29	4726.56	4276.02	4638.24	4685.17	4788.8	3764.17	4082.44	4086.45	4571	4701	4474	4712	4983	4844	3664	3871	3876
Iqgap2	NM_027711	544963	chr13	IQ motif containing GTPase activating protein 2	8441	2.7819	-0.365418	1.91686	0.912211	0.217349	2.11013e-11	0.00144908	0.735376	1.05633e-08	0.0253639	1.0067	1.31453	5.25765	6.00831	4.12107	1.48762	1.41104	1.6483	1.58085	-0.553713	-0.197145	1.80517	2.01568	1.4814	-0.050009	247.925	317.718	1275.92	1476.52	1019.23	351.939	331.834	388.103	373.224	249	316	1335	1500	1084	356	323	368	354
Irak3	NM_028679	73914	chr10	interleukin-1 receptor-associated kinase 3	10737	2.19843	0.04025	0.629658	0.724988	0.849613	0.00231013	0.000429335	0.982172	0.0434103	0.00968131	1.69744	1.72228	2.27357	2.86516	3.22187	2.29864	1.72375	1.78478	1.65791	0.0430919	0.0370064	0.441807	0.792527	0.970552	0.421008	215.068	214.159	283.85	362.24	409.945	279.773	208.552	216.201	201.377	216	213	297	368	436	283	203	205	191
Irf7	NM_016850	54123	chr7	interferon regulatory factor 7	11124	3.06855	-0.49439	-1.28345	-0.291218	0.105112	5.2644e-05	0.335256	0.581646	0.00271127	0.67947	2.28563	3.16737	1.86612	1.28277	2.65861	3.68695	5.23918	4.36181	2.3203	-0.729777	-0.28836	-1.0415	-1.55974	-0.506886	-0.100836	172.253	234.267	138.586	96.4625	201.198	266.924	377.028	314.278	167.653	173	233	145	98	214	270	367	298	159
Irgm2	NM_019440	54396	chr11	immunity-related GTPase family M member 2	7817	5.41257	-0.694036	-0.691055	-0.142304	0.00731499	0.00753936	0.574758	0.15386	0.0989047	0.83738	2.59612	5.4654	4.22351	3.82196	5.88764	5.9911	6.40675	8.90806	4.88439	-1.30826	-0.263271	-0.628792	-0.754592	-0.122918	-0.161768	389.312	804.349	624.102	571.903	886.635	863.051	917.416	1277.14	702.176	391	800	653	581	943	873	893	1211	666
Irs2	NM_001081212	384783	chr8	insulin receptor substrate 2	6291	7.65154	0.321486	0.258889	0.869773	0.0850335	0.165991	2.50218e-06	0.533402	0.537742	0.00013928	8.39181	5.7025	5.84629	7.65154	11.1011	9.68943	7.05678	5.77282	4.72775	0.583927	-3.52072e-05	0.0416837	0.447684	0.993411	0.733308	1436.78	958.183	986.325	1307.21	1908.67	1593.63	1153.7	944.946	775.974	1443	953	1032	1328	2030	1612	1123	896	736
Isg20l2	NM_177663	229504	chr3	interferon stimulated exonuclease gene 20-like 2	8925	4.39674	-0.507978	-0.0717495	0.0123712	0.000939038	0.632349	0.934003	0.0418223	0.88146	0.977592	3.28243	3.48525	4.72944	4.41864	4.33031	5.48493	4.6448	4.79807	5.50526	-0.537118	-0.47784	-0.0324999	-0.112305	-0.132226	0.144303	405.244	422.284	575.358	544.342	536.863	650.502	547.575	566.338	651.555	407	420	602	553	571	658	533	537	618
Isyna1	NM_023627	71780	chr8	myo-inositol 1-phosphate synthase A1	7726	10.6237	0.114091	0.0272146	0.398982	0.402613	0.842146	0.00306489	0.859448	0.960698	0.0442923	10.6123	9.91357	9.70702	9.60859	12.3545	12.8843	11.3161	8.59284	9.56262	0.175397	0.0502106	0.0257084	0.0291224	0.40052	0.39707	832.394	763.127	750.259	752.039	973.135	970.809	847.553	644.383	719.035	836	759	785	764	1035	982	825	611	682
Itfg3	NM_207217	106581	chr17	integrin alpha FG-GAP repeat containing 3	5015	14.6403	-0.164512	-0.47913	-0.291845	0.113244	5.23857e-06	0.00514634	0.594043	0.000455282	0.0631436	14.7179	15.3449	12.3841	11.7639	12.5677	15.2458	18.3776	16.7209	17.2379	-0.181017	-0.147931	-0.451167	-0.507138	-0.402669	-0.18812	1798.21	1839.95	1490.97	1434.19	1541.97	1789.37	2144.06	1953.16	2018.98	1806	1830	1560	1457	1640	1810	2087	1852	1915
Itga3	NM_013565	16400	chr11	integrin alpha 3	3137	16.237	0.27766	0.181154	0.712475	0.0176909	0.122513	8.15498e-10	0.248353	0.469026	1.00058e-07	17.0674	14.1824	13.8953	15.3233	22.2381	20.3537	14.6652	12.1707	13.2495	0.417185	0.123059	0.0994085	0.258603	0.804959	0.613231	3534.69	2882.59	2835.7	3166.64	4625	4049.32	2900.18	2409.82	2630.47	3550	2867	2967	3217	4919	4096	2823	2285	2495
Itga4	NM_010576	16401	chr2	integrin alpha 4	8641	1.46847	-0.0485904	-0.228242	-0.489924	0.779841	0.191978	0.00562917	0.966561	0.570282	0.0669032	1.62317	1.49188	1.35924	1.3895	0.99077	1.33184	1.49491	2.06643	1.44689	0.0236714	-0.124862	-0.253132	-0.203335	-0.681142	-0.319103	681.05	614.323	561.976	581.748	417.452	536.812	598.943	828.927	581.981	684	611	588	591	444	543	583	786	552
Itga7	NM_008398	16404	chr10	integrin alpha 7	1582	37.3069	0.446312	0.2015	1.16096	5.54984e-06	0.0413247	8.82116e-33	0.000951456	0.2722	7.88549e-30	38.5789	31.2805	29.2694	29.6885	54.8166	61.0503	27.0672	26.704	25.9637	0.601614	0.272041	0.182039	0.220659	1.11443	1.20578	6618.33	5266.48	4947.91	5082.18	9443.69	10061	4433.99	4379.85	4269.9	6647	5238	5177	5163	10044	10177	4316	4153	4050
Itgav	NM_008402	16410	chr2	integrin alpha V	3895	8.6393	0.109328	0.814826	0.444193	0.310247	1.36978e-14	3.10566e-05	0.811225	1.90476e-11	0.00116865	6.57791	7.6495	11.7329	11.4318	8.89096	9.19836	7.54718	6.08574	6.84193	0.0109851	0.201553	0.824297	0.80492	0.451583	0.436599	1980.42	2260.22	3480.84	3434.38	2688.12	2660.33	2169.74	1751.74	1974.7	1989	2248	3642	3489	2859	2691	2112	1661	1873
Itgb1	NM_010578	16412	chr8	integrin beta 1 (fibronectin receptor beta)	362	98.541	0.116921	0.185824	0.258421	0.161017	0.0256521	0.00188323	0.677856	0.210377	0.0308189	91.4862	101.299	97.0195	104.865	106.764	107.593	86.7774	92.5233	96.7441	0.0557078	0.175615	0.119196	0.249493	0.284576	0.231714	16374.1	17793.2	17110.8	18728.2	19189.2	18498.8	14830.7	15832	16598.8	16445	17697	17903	19026	20409	18712	14436	15012	15744
Itgb3	NM_016780	16416	chr11	integrin beta 3	8953	2.16749	-0.297618	-0.917441	-0.0837713	0.241141	0.000426428	0.739558	0.759138	0.0133419	0.907639	2.29726	1.98152	1.56528	1.22	1.48442	3.57203	2.49099	2.72846	2.95664	-0.182277	-0.422194	-0.755752	-1.09618	-0.804921	0.395771	566.546	479.594	380.389	300.223	367.609	846.248	586.614	643.324	698.999	569	477	398	305	391	856	571	610	663
Itgb4	NM_133663	192897	chr11	integrin beta 4	8189	2.77108	0.0293397	-0.894882	0.138845	0.879993	9.21975e-06	0.473211	0.983169	0.000716678	0.777809	3.05528	3.00784	1.74715	1.44619	2.31079	4.33354	3.34747	2.92036	2.96307	0.0539402	0.00435083	-0.772169	-1.02617	-0.342353	0.499751	783.605	757.095	441.555	370.112	595.15	1067.69	819.816	716.095	728.525	787	753	462	376	633	1080	798	679	691
Itgb5	NM_010580	16419	chr16	integrin beta 5	6622	8.21371	-0.117549	-0.404969	-0.177135	0.305256	0.000483992	0.122867	0.808839	0.0147019	0.432337	8.04746	8.51639	7.09159	6.4665	7.63474	8.40665	9.78055	9.76582	8.366	-0.144932	-0.0903503	-0.348393	-0.463277	-0.21475	-0.139888	1117.16	1160.27	970.083	895.753	1064.34	1121.08	1296.5	1296.13	1113.35	1122	1154	1015	910	1132	1134	1262	1229	1056
Itih5	NM_172471	209378	chr2	inter-alpha (globulin) inhibitor H5	3718	7.78406	-0.0873003	-0.470381	-0.683723	0.480219	0.000173018	6.2052e-08	0.889254	0.00694015	4.92115e-06	8.08141	9.68083	6.83446	6.76159	5.13902	6.73454	8.51916	10.5215	10.2494	-0.208713	0.0246542	-0.471617	-0.468965	-0.855455	-0.529557	2734.16	3214.38	2278.5	2282.7	1746	2188.77	2752.24	3403.26	3324.2	2746	3197	2384	2319	1857	2214	2679	3227	3153
Itk	NM_010583	16428	chr11	IL2-inducible T-cell kinase	10055	2.13461	-0.486675	-0.01818	1.52063	0.0465735	0.939349	4.3653e-11	0.405614	0.984091	6.82896e-09	1.14094	0.966112	1.72295	1.19528	3.71651	4.8637	1.43927	2.0321	1.12154	-0.358285	-0.623912	0.212892	-0.29459	1.34671	1.67038	208.099	172.936	309.665	217.537	680.718	852.177	250.674	354.343	196.114	209	172	324	221	724	862	244	336	186
Itm2a	NM_008409	16431	chrX	integral membrane protein 2A	6060	18.5107	-0.194787	-0.402153	-0.811778	0.186924	0.00682535	8.06535e-08	0.708466	0.0928	6.15474e-06	16.6697	23.8302	17.4638	17.5211	11.4673	15.2051	22.075	23.8531	25.9609	-0.459272	0.0288564	-0.413406	-0.390579	-0.99236	-0.649719	1160.97	1628.81	1198.51	1217.64	802.008	1017.27	1468.07	1588.26	1733.26	1166	1620	1254	1237	853	1029	1429	1506	1644
Itpkc	NM_181593	233011	chr7	inositol 1,4,5-trisphosphate 3-kinase C	8964	4.15206	-0.0354219	0.25051	1.21198	0.841232	0.151103	1.04419e-12	0.980719	0.51753	2.14229e-10	3.23369	2.56629	4.05403	3.02418	6.29967	7.63628	3.47844	2.92386	2.84302	0.133392	-0.226261	0.437723	0.0338631	1.09997	1.31332	444.077	345.871	548.601	414.407	868.766	1007.39	456.138	383.889	374.283	446	344	574	421	924	1019	444	364	355
Itpr1	NM_010585	16438	chr6	inositol 1,4,5-trisphosphate receptor 1	8144	1.75316	-0.159703	-0.17398	1.11493	0.40353	0.362684	1.68677e-09	0.859448	0.723806	1.90179e-07	1.17876	1.31737	1.27711	1.19125	2.15466	3.97487	1.44215	1.48911	1.39855	-0.227495	-0.0944374	-0.133297	-0.215424	0.647429	1.46619	496.847	544.947	530.438	501.031	912.008	1609.45	580.449	600.083	565.108	499	542	555	509	970	1628	565	569	536
Itpr3	NM_080553	16440	chr17	inositol 1,4,5-triphosphate receptor 3	4931	4.86921	0.3863	-0.158958	0.139453	0.000348716	0.148286	0.199754	0.0218209	0.511978	0.548589	6.21838	5.51702	4.10318	3.93666	4.59539	5.40249	4.89355	4.28705	4.77588	0.482516	0.282877	-0.138187	-0.179813	0.0524495	0.221772	2385.67	2077.23	1551.18	1507.03	1770.45	1991.05	1792.71	1572.45	1756.46	2396	2066	1623	1531	1883	2014	1745	1491	1666
Itpripl1	NM_001163528	73338	chr2	inositol 1,4,5-triphosphate receptor interacting protein-like 1	8987	3.46967	-0.114266	-0.0629867	0.378581	0.415048	0.651817	0.00562713	0.862867	0.891724	0.0669032	2.97262	3.11066	3.04971	3.24588	4.07393	4.56943	3.26668	3.46847	3.49301	-0.133447	-0.095117	-0.117787	-0.00993636	0.326466	0.427892	467.973	480.599	473.091	509.89	644.052	691.034	491.071	522.042	527.151	470	478	495	518	685	699	478	495	500
Itpripl2	NM_001033380	319622	chr7	inositol 1,4,5-triphosphate receptor interacting protein-like 2	7913	2.62167	-0.419766	-0.0572388	-0.0145173	0.00322213	0.682614	0.917249	0.091498	0.903462	0.970696	1.85595	2.33283	2.87411	2.50221	2.48356	3.11982	2.90895	2.89594	2.89102	-0.578222	-0.275877	0.0305979	-0.150969	-0.152577	0.112131	543.644	670.627	829.589	731.367	730.551	877.881	813.654	811.009	811.812	546	667	868	743	777	888	792	769	770
Itsn2	NM_011365	20403	chr12	intersectin 2	2748	38.2313	0.304981	0.0875544	0.128918	0.00181737	0.373265	0.189285	0.064799	0.733673	0.535103	43.8739	41.1282	33.6278	39.4053	35.9065	40.0828	36.5611	35.2644	35.1039	0.363802	0.243517	-0.0410317	0.205756	0.0808343	0.175521	4399.94	4047.89	3323.13	3943.29	3616.13	3861.49	3501.17	3381.12	3374.81	4419	4026	3477	4006	3846	3906	3408	3206	3201
Jag1	NM_013822	16449	chr2	jagged 1	7439	3.88844	0.590847	0.315502	-0.0823004	5.32782e-06	0.0159037	0.535915	0.000939122	0.1591	0.817925	4.63835	5.27074	4.54726	3.63173	2.84382	3.43314	3.38256	3.35992	3.47184	0.509576	0.666756	0.459781	0.153876	-0.189313	0.0180836	1087.29	1212.56	1050.37	849.488	669.437	773.088	757.151	753.005	780.183	1092	1206	1099	863	712	782	737	714	740
Jak2	NM_008413	16452	chr19	Janus kinase 2	6086	6.27301	0.0897837	0.249539	0.404978	0.432337	0.0279881	0.000336862	0.872112	0.220157	0.0080444	5.52027	5.99338	6.77569	6.0728	7.23513	7.2036	5.23169	6.15156	5.41939	0.0431717	0.134651	0.317362	0.177574	0.439239	0.368959	1190.84	1268.86	1440.31	1307.21	1567.36	1492.79	1077.68	1268.71	1120.72	1196	1262	1507	1328	1667	1510	1049	1203	1063
Jam2	NM_023844	67374	chr16	junction adhesion molecule 2	3222	15.0447	-0.148384	-0.230714	-0.628622	0.237037	0.0666173	8.36725e-07	0.753115	0.35163	5.1081e-05	14.4438	17.5179	13.7397	16.3784	10.5304	12.6009	15.9733	19.1733	19.8328	-0.279453	-0.0282277	-0.372754	-0.101276	-0.729095	-0.534233	2969.14	3534.11	2783.13	3359.57	2173.81	2488.32	3135.44	3768.16	3908.28	2982	3515	2912	3413	2312	2517	3052	3573	3707
Jmjd1c	NM_207221	108829	chr10	jumonji domain containing 1C	5361	4.67885	-0.371365	0.480934	0.706581	0.00596202	0.000246811	6.24857e-08	0.138947	0.0089026	4.92115e-06	2.73625	3.24501	5.26307	5.51562	7.22949	5.452	3.81381	4.17553	4.02159	-0.484606	-0.26587	0.437172	0.522863	0.922253	0.451325	978.76	1139.16	1855.1	1968.69	2596.92	1873.4	1302.67	1427.96	1379.02	983	1133	1941	2000	2762	1895	1268	1354	1308
Jmjd8	NM_028101	72106	chr17	jumonji domain containing 8	7419	10.102	-0.109604	-0.426075	-0.13423	0.361511	0.000470424	0.263646	0.844087	0.0144298	0.612271	10.6622	9.84599	8.08301	8.37567	9.49114	10.8819	12.2319	11.244	10.9147	-0.0402825	-0.182099	-0.460547	-0.391206	-0.201883	-0.0687756	951.877	862.666	711.073	746.133	850.903	933.242	1042.75	959.711	934.113	956	858	744	758	905	944	1015	910	886
Jmy	NM_021310	57748	chr13	junction-mediating and regulatory protein	3212	8.61295	0.151231	0.394738	0.0582592	0.242035	0.00212802	0.652886	0.760119	0.0410356	0.872952	8.51428	8.50353	9.18958	10.9287	9.02079	7.02312	7.12394	8.59959	8.08365	0.165507	0.136616	0.254362	0.522466	0.254931	-0.170096	3190.18	3126.91	3392.9	4086.02	3394.24	2527.86	2548.83	3080.55	2903.53	3204	3110	3550	4151	3610	2557	2481	2921	2754
Jun	NM_010591	16476	chr4	Jun oncogene	1738	44.0097	0.61242	0.533855	1.56519	3.34478e-06	5.16851e-05	7.49213e-33	0.000721723	0.00268398	7.21262e-30	42.4762	34.1684	41.9545	30.7028	79.9111	69.6145	27.766	25.4838	24.7202	0.772749	0.431744	0.733697	0.301448	1.69045	1.42744	5776.98	4560.66	5622.67	4166.73	10914.2	9095.16	3605.96	3313.63	3222.99	5802	4536	5883	4233	11608	9200	3510	3142	3057
Junb	NM_008416	16477	chr8	Jun-B oncogene	7555	11.7626	1.08931	1.15198	1.73046	3.23883e-05	1.09106e-05	3.84251e-11	0.00386038	0.000798515	6.08721e-09	12.1351	10.6334	13.0192	10.7665	24.9684	10.5374	6.60415	5.43668	4.59403	1.19244	0.975023	1.27258	1.01688	2.23866	0.931106	952.872	819.432	1007.36	843.582	1968.86	794.834	495.175	408.144	345.821	957	815	1054	857	2094	804	482	387	328
Jund	NM_010592	16478	chr8	Jun proto-oncogene related gene d	2348	37.1692	0.250921	0.217614	0.4023	0.061128	0.104563	0.00259299	0.460576	0.440015	0.0388343	37.8677	35.5514	36.4375	35.2683	41.7679	40.4548	39.577	30.4294	25.8968	0.308787	0.190671	0.232029	0.203101	0.456262	0.346174	4650.85	4285.17	4409.82	4322.26	5151.53	4772.98	4641.51	3573.06	3049.04	4671	4262	4614	4391	5479	4828	4518	3388	2892
Kbtbd8	NM_001102670	243574	chr6	kelch repeat and BTB (POZ) domain containing 8	10085	1.80598	-0.857288	-0.239649	-0.254968	3.89839e-06	0.18077	0.154711	0.000774417	0.557105	0.487217	1.15602	1.30627	1.84499	1.92761	1.61115	2.17097	2.04096	2.38992	2.49676	-0.93123	-0.78264	-0.280372	-0.199263	-0.448106	-0.0828675	223.033	247.338	350.755	371.098	312.146	402.362	376.011	440.835	461.783	224	246	367	377	332	407	366	418	438
Kcna1	NM_010595	16485	chr6	potassium voltage-gated channel, shaker-related subfamily, member 1	115	97.2108	0.199729	0.25227	0.0841562	0.0296288	0.00595666	0.360587	0.323001	0.0849062	0.700846	105.251	94.6702	103.66	103.589	98.0489	87.9015	86.5686	97.9979	86.0167	0.286879	0.106952	0.243669	0.260802	0.190702	-0.0309361	40289.5	35565.3	39100.7	39567.8	37691.1	32323.4	31643	35864.5	31564.6	40464	35373	40911	40197	40087	32696	30801	34007	29939
Kcna4	NM_021275	16492	chr2	potassium voltage-gated channel, shaker-related subfamily, member 4	6551	5.53438	0.0127564	-0.149869	-0.46631	0.912071	0.19708	7.62853e-05	0.984876	0.576172	0.00237421	5.92931	6.28418	5.0392	5.85534	4.07634	4.77429	6.31313	6.00329	6.48541	-0.0158825	0.0408555	-0.27156	-0.037087	-0.549877	-0.386065	1225.69	1274.89	1026.47	1207.79	846.201	948.071	1246.16	1186.46	1285.19	1231	1268	1074	1227	900	959	1213	1125	1219
Kcnb2	NM_001098528	98741	chr1	potassium voltage gated channel, Shab-related subfamily, member 2	4941	8.46863	0.811317	0.3396	0.00309264	7.95908e-05	0.101043	0.988179	0.00696558	0.434691	0.996175	11.989	11.1691	5.83077	10.8287	7.66589	5.62798	6.85238	7.78532	5.87368	0.874108	0.744884	-0.186508	0.724204	0.235307	-0.274215	2716.23	2483.43	1301.72	2448.07	1744.13	1224.88	1482.45	1686.34	1275.71	2728	2470	1362	2487	1855	1239	1443	1599	1210
Kcnh5	NM_172805	238271	chr12	potassium voltage-gated channel, subfamily H (eag-related), member 5	9700	2.52203	0.640308	0.306886	0.0189656	0.00235955	0.148622	0.929584	0.0759121	0.512963	0.975924	3.37827	2.92621	2.02039	2.97701	2.08538	2.04871	2.33423	2.40602	1.54844	0.751315	0.517422	-0.00989175	0.566124	0.0629179	-0.0264469	585.464	497.692	345.015	514.814	362.926	341.067	386.279	398.645	257.263	588	495	361	523	386	345	376	378	244
Kcnh7	NM_133207	170738	chr2	potassium voltage-gated channel, subfamily H (eag-related), member 7	4677	12.7791	0.657307	0.283361	0.0691799	0.000667091	0.144986	0.723295	0.0339376	0.507762	0.902149	17.674	14.7593	10.227	14.7716	13.1477	8.52102	10.7999	12.3323	8.84831	0.793378	0.506405	-0.0167244	0.531561	0.372813	-0.316521	2864.59	2347.7	1633.37	2389.01	2139.98	1326.7	1671.48	1910.97	1374.81	2877	2335	1709	2427	2276	1342	1627	1812	1304
Kcnip1	NM_027398	70357	chr11	Kv channel-interacting protein 1	4349	23.0222	-0.0733641	0.0104676	-0.271045	0.469922	0.917581	0.00800483	0.885918	0.977123	0.0874939	22.9266	22.5952	24.2668	23.9397	21.2947	18.6693	24.6943	25.7913	23.9347	-0.0495238	-0.0975826	0.0111838	0.00972049	-0.149919	-0.403646	2196.49	2124.49	2290.93	2288.6	2048.77	1718.19	2259.12	2362.35	2198.21	2206	2113	2397	2325	2179	1738	2199	2240	2085
Kcnip2	NM_145704	80906	chr19	Kv channel-interacting protein 2	1546	64.5781	-0.0783117	-0.242143	-0.296475	0.417318	0.0125595	0.00228175	0.863833	0.136443	0.0356243	70.4837	64.2638	58.5952	61.6117	60.1366	56.6448	77.742	67.1471	76.2246	-0.000351453	-0.16069	-0.288042	-0.197518	-0.223282	-0.373583	6758.72	6047.7	5536.65	5895.25	5790.89	5217.85	7118.43	6155.83	7006.85	6788	6015	5793	5989	6159	5278	6929	5837	6646
Kcnj16	NM_010604	16517	chr11	potassium inwardly-rectifying channel, subfamily J, member 16	10604	1.74537	-0.332463	-1.73345	-0.622611	0.215282	1.91827e-09	0.0218139	0.733795	6.4884e-07	0.168317	1.68232	2.26907	1.00045	0.493157	1.17905	2.09699	2.49862	2.74334	2.47762	-0.54726	-0.144005	-1.31439	-2.30777	-1.05185	-0.288219	265.848	351.903	155.795	77.7583	187.09	318.332	377.036	414.468	375.335	267	350	163	79	199	322	367	393	356
Kcnj2	NM_008425	16518	chr11	potassium inwardly-rectifying channel, subfamily J, member 2	10963	1.04742	-1.26859	0.0188569	-0.0436102	5.57249e-07	0.936271	0.853621	0.000183525	0.98281	0.949269	0.48394	0.506751	1.12639	1.28988	1.26854	1.06235	0.985668	1.65588	1.06908	-1.2821	-1.24307	-0.0917439	0.121168	0.106352	-0.212396	112.512	115.626	258.046	299.241	296.173	237.263	218.83	368.052	238.281	113	115	270	304	315	240	213	349	226
Kcnj3	NM_008426	16519	chr2	potassium inwardly-rectifying channel, subfamily J, member 3	8268	9.56628	0.140544	-0.0921439	-0.430637	0.273388	0.476817	0.00108366	0.785315	0.802173	0.0202419	11.2282	10.8524	9.11016	9.66492	7.76189	7.21019	10.5108	10.1917	10.4221	0.177916	0.101818	-0.144455	-0.0412021	-0.347868	-0.517943	804.515	763.127	643.214	691.01	558.496	496.278	719.139	698.165	715.871	808	759	673	702	594	502	700	662	679
Kcnk2	NR_027627	16526	chr1	potassium channel, subfamily K, member 2	8588	3.9891	-0.125561	-0.28049	-0.561269	0.546846	0.180546	0.00806391	0.918412	0.556671	0.088029	3.44449	5.23734	3.1866	4.58095	2.74403	3.73919	4.18981	4.79037	5.70326	-0.44231	0.134236	-0.575568	-0.0347496	-0.763555	-0.381932	514.769	768.154	469.263	683.137	411.811	536.812	597.916	684.455	817.077	517	764	491	694	438	543	582	649	775
Kcnk5	NM_021542	16529	chr14	potassium channel, subfamily K, member 5	11307	1.36556	-0.598227	-0.719751	-0.285454	0.00959558	0.00194418	0.20773	0.184203	0.0386827	0.557289	1.19989	1.07759	1.00668	1.08571	1.12177	1.74915	1.70121	1.98246	1.67775	-0.508115	-0.689151	-0.780943	-0.6546	-0.598732	-0.0246812	172.254	151.822	142.401	155.526	161.706	241.22	233.209	272.092	230.898	173	151	149	158	172	244	227	258	219
Kcnn2	NM_080465	140492	chr18	potassium intermediate/small conductance calcium-activated channel, subfamily N, member 2	8801	6.35978	-0.202846	-0.184057	-0.665922	0.223983	0.269024	9.2285e-05	0.741838	0.654399	0.00281694	6.32903	6.92277	6.35407	7.05003	5.41524	4.24317	7.60269	6.96124	9.1195	-0.254543	-0.152433	-0.270061	-0.102273	-0.472989	-0.8879	552.606	593.208	546.683	614.231	474.819	355.895	633.871	581.106	763.308	555	590	572	624	505	360	617	551	724
Kcnn4	NM_008433	16534	chr7	potassium intermediate/small conductance calcium-activated channel, subfamily N, member 4	8733	7.029	-0.480517	-0.915388	0.279779	0.037806	0.000103269	0.214706	0.36775	0.00461574	0.565717	5.60587	5.85411	4.62245	3.84871	6.23799	13.5031	9.14411	7.41565	8.278	-0.497486	-0.462126	-0.796286	-1.04175	-0.337639	0.711102	466.977	478.588	379.432	319.91	521.809	1080.55	727.356	590.597	661.048	469	476	397	325	555	1093	708	560	627
Kcnq3	NM_152923	110862	chr15	potassium voltage-gated channel, subfamily Q, member 3	9004	4.52183	0.573407	0.206261	0.298765	0.00341923	0.297269	0.129841	0.0942548	0.672253	0.44605	6.04781	4.78801	3.29311	5.10029	4.917	4.10581	4.22225	3.70039	3.40276	0.742884	0.379377	-0.15367	0.494307	0.450769	0.12722	742.783	577.122	398.536	625.061	606.45	484.414	495.177	434.51	400.641	746	574	417	635	645	490	482	412	380
Kctd11	NM_153143	216858	chr11	potassium channel tetramerisation domain containing 11	9893	3.4167	-0.296447	-0.421372	1.02746	0.13208	0.0331939	4.33151e-08	0.632581	0.241943	3.68768e-06	2.40862	2.38127	2.47153	1.91925	4.81191	7.34447	3.20462	2.7919	3.14331	-0.274012	-0.317402	-0.258098	-0.603478	0.727862	1.27311	279.788	271.469	282.902	222.46	561.305	819.554	355.46	310.067	350.029	281	270	296	226	597	829	346	294	332
Kctd21	NM_001039039	622320	chr7	potassium channel tetramerisation domain containing 21	9985	2.91516	-0.716555	-0.543584	-0.177831	0.000402131	0.00667539	0.366671	0.0236275	0.0913269	0.7052	2.29944	2.07526	2.61452	2.31704	2.40577	4.04762	3.88381	3.67778	3.61476	-0.630207	-0.80464	-0.466709	-0.622358	-0.55922	0.125622	291.736	258.398	326.864	293.333	306.5	493.315	470.522	446.11	439.647	293	257	342	298	326	499	458	423	417
Kctd6	NM_027782	71393	chr14	potassium channel tetramerisation domain containing 6	3897	36.3279	0.083428	0.347592	0.0262101	0.48532	0.00340017	0.826674	0.892226	0.0573652	0.938495	35.0969	35.107	43.346	40.9018	38.2215	29.6174	31.8654	36.4675	34.6069	0.0966082	0.0699529	0.379826	0.314232	0.225679	-0.206105	2468.31	2423.1	3003.92	2870.35	2699.41	2000.93	2139.95	2452	2333.16	2479	2410	3143	2916	2871	2024	2083	2325	2213
Kdm3a	NM_173001	104263	chr6	lysine (K)-specific demethylase 3A	7552	4.19678	-0.18914	0.474773	0.315916	0.232309	0.00214212	0.0419542	0.74893	0.0411176	0.249571	3.22813	3.28691	5.10059	5.21144	5.47026	3.81318	3.48291	3.98084	4.07503	-0.188507	-0.189552	0.449452	0.498547	0.577602	-0.00642042	669.101	668.616	1041.76	1077.86	1138.63	759.246	689.348	788.86	809.701	672	665	1090	1095	1211	768	671	748	768
Kdm4a	NM_172382	230674	chr4	lysine (K)-specific demethylase 4A	5110	9.07516	0.18564	0.253517	0.378447	0.0683472	0.0125149	0.000181249	0.488021	0.136367	0.00478715	8.89604	8.79971	9.21233	9.3195	10.5374	9.84258	8.3836	7.61017	8.17918	0.206803	0.164041	0.235957	0.270743	0.457029	0.294678	1752.41	1701.2	1788.2	1831.87	2084.49	1862.53	1576.97	1433.24	1544.55	1760	1692	1871	1861	2217	1884	1535	1359	1465
Kdm5a	NM_145997	214899	chr6	lysine (K)-specific demethylase 5A	5319	3.57099	-0.0345735	0.419276	0.224873	0.789608	0.0010311	0.0798887	0.966838	0.0248635	0.34959	2.93536	3.26758	4.0736	4.40866	4.14433	3.31974	2.90744	3.51124	3.44668	-0.0998076	0.0277087	0.351442	0.483531	0.403565	0.0196887	1374.05	1501.12	1879	2059.25	1948.16	1492.79	1299.59	1571.39	1546.65	1380	1493	1966	2092	2072	1510	1265	1490	1467
Kdm5c	NM_013668	20591	chrX	lysine (K)-specific demethylase 5C	4486	4.55013	0.000856373	0.023615	0.338786	0.993063	0.810208	0.000497959	0.998957	0.954864	0.0107263	4.2385	4.18239	4.37022	4.17829	4.89387	5.863	4.39674	4.27802	4.40091	0.0238077	-0.0224761	0.0467153	6.43011e-05	0.237205	0.433765	1992.37	1929.43	2024.27	1959.83	2310.14	2647.48	1973.52	1922.58	1983.13	2001	1919	2118	1991	2457	2678	1921	1823	1881
Kdm6b	NM_001017426	216850	chr11	KDM1 lysine (K)-specific demethylase 6B	7500	3.15792	-0.215766	0.299344	0.759862	0.29238	0.137503	0.000141268	0.797854	0.495349	0.00392881	2.42309	2.08849	3.3832	3.0652	5.78874	3.10335	2.78519	2.62612	2.73462	-0.100006	-0.34109	0.359732	0.235575	1.16126	0.198625	687.024	581.143	945.234	867.207	1648.24	845.253	754.068	711.875	743.283	690	578	989	881	1753	855	734	675	705
Kif13b	NM_001081177	16554	chr14	kinesin family member 13B	6997	4.3346	0.389339	0.307795	0.242554	0.000769913	0.0079613	0.0369316	0.0370714	0.10219	0.232846	4.82628	4.71737	4.34441	4.6661	4.53048	4.15337	3.74811	3.69071	3.88204	0.41862	0.358667	0.24579	0.366857	0.333527	0.144301	1154	1106.99	1023.6	1113.29	1087.85	954.002	855.775	843.703	889.829	1159	1101	1071	1131	1157	965	833	800	844
Kif19a	NM_001102615	286942	chr11	kinesin family member 19A	10699	1.80746	-0.310699	-1.30416	-0.63113	0.274519	1.21813e-05	0.0284407	0.785975	0.000861293	0.199627	1.90298	2.10488	1.27775	0.733947	1.00336	2.26191	2.89341	2.28144	2.54486	-0.369963	-0.251971	-0.963169	-1.73943	-1.28292	-0.179255	278.792	302.637	184.465	107.289	147.596	318.333	404.771	319.56	357.411	280	301	193	109	157	322	394	303	339
Kif22	NM_145588	110033	chr7	kinesin family member 22	11464	2.11952	-0.0230127	0.509588	1.25244	0.921337	0.0239168	1.11987e-08	0.986624	0.201721	1.10356e-06	1.37911	1.46553	2.42256	1.69114	3.48655	3.45841	1.60011	1.45274	1.43591	-0.0530209	0.00710496	0.733578	0.235939	1.28395	1.20849	121.473	126.685	210.267	148.633	308.392	292.626	134.582	122.342	121.25	122	126	220	151	328	296	131	116	115
Kif26b	NM_001161665	269152	chr1	kinesin family member 26B	7028	3.26377	0.561066	-0.209699	-0.171585	0.00018476	0.172344	0.263321	0.0132889	0.546638	0.61207	4.85477	4.0746	2.17276	3.0557	2.64545	2.78079	3.4756	3.05048	2.88475	0.693748	0.414127	-0.486187	0.0232934	-0.175293	-0.167343	1534.35	1263.84	676.661	963.676	839.622	844.267	1048.91	921.745	874.019	1541	1257	708	979	893	854	1021	874	829
Kif5a	NM_008447	16572	chr10	kinesin family member 5A	57	204.71	0.291607	0.140658	0.161394	0.00118953	0.119016	0.0735299	0.0486504	0.464447	0.336586	234.539	214.44	190.392	213.637	216.821	196.587	190.865	180.401	198.829	0.367649	0.211321	0.0455685	0.229871	0.260412	0.0550493	63166.4	56679.5	50527.6	57413	58641.4	50860.7	49085.2	46450.8	51333.7	63440	56373	52867	58326	62369	51447	47779	44045	48690
Kif5b	NM_008448	16573	chr18	kinesin family member 5B	146	121.381	0.286426	0.167795	0.0689481	0.000279823	0.0337095	0.383937	0.0187272	0.243453	0.717052	132.113	135.545	120.455	125.785	116.856	115.222	105.873	119.2	115.826	0.281445	0.291356	0.126934	0.207512	0.11048	0.0261418	33996.7	34231.1	30543.8	32298.4	30197.4	28482.7	26015.3	29325.9	28572.5	34144	34046	31958	32812	32117	28811	25323	27807	27101
Kin	NM_025280	16588	chr2	antigenic determinant of rec-A protein	10429	5.15335	-0.748994	0.142294	0.00772108	4.14188e-05	0.411	0.964641	0.0044304	0.761573	0.988403	3.14701	3.44695	6.74094	5.48145	5.56846	5.66597	5.75883	5.41719	6.03637	-0.799082	-0.69536	0.274575	-0.00492184	0.0268875	-0.0119629	185.197	199.077	390.901	321.879	329.077	320.307	323.614	304.793	340.54	186	198	409	327	350	324	315	289	323
Kirrel	NM_130867	170643	chr3	kin of IRRE like (Drosophila)	6541	3.74757	-0.0393534	0.338141	0.162624	0.749343	0.00533296	0.182795	0.961412	0.078584	0.52809	3.03215	3.65356	4.06403	4.60289	3.58587	4.17642	3.43895	3.42665	3.79834	-0.165185	0.076462	0.235779	0.433381	0.0826271	0.238419	942.915	1115.03	1245.34	1428.29	1119.81	1247.62	1021.18	1018.77	1132.32	947	1109	1303	1451	1191	1262	994	966	1074
Klf12	NM_010636	16597	chr14	Kruppel-like factor 12	10117	1.4513	-0.0318999	-0.544492	-0.182554	0.857605	0.00283072	0.307287	0.982172	0.0505216	0.653808	1.70086	1.42768	1.00679	1.18523	1.25501	1.59816	1.71912	1.71754	1.53711	0.100858	-0.178071	-0.674448	-0.421842	-0.33046	-0.0465712	416.197	342.855	242.754	289.398	308.387	375.67	401.691	401.814	360.577	418	341	254	294	328	380	391	381	342
Klf13	NM_021366	50794	chr7	Kruppel-like factor 13	1862	19.9042	0.162291	0.322477	0.424936	0.132817	0.00271244	7.50029e-05	0.634186	0.0488434	0.0023408	19.3229	18.2866	21.1503	20.8499	25.2602	20.1338	16.7875	17.4427	17.9948	0.214544	0.107963	0.323662	0.321144	0.607119	0.215909	5274.15	4898.49	5688.62	5678.69	6923.87	5279.15	4375.44	4551.75	4708.49	5297	4872	5952	5769	7364	5340	4259	4316	4466
Klf15	NM_023184	66277	chr6	Kruppel-like factor 15	9814	4.15405	-0.152206	0.496581	0.235824	0.404597	0.00513832	0.187974	0.859448	0.077291	0.533326	3.13262	3.45346	4.70611	5.60265	4.93501	3.72138	3.7036	3.97761	3.68484	-0.209562	-0.0963192	0.354833	0.624005	0.450488	-0.0196294	306.671	331.795	453.974	547.296	485.162	349.964	346.216	372.284	345.815	308	330	475	556	516	354	337	353	328
Klf2	NM_008452	16598	chr8	Kruppel-like factor 2 (lung)	10911	3.19886	-1.2742	-0.208922	-0.0698946	5.00935e-08	0.340119	0.748014	1.95912e-05	0.706101	0.910809	1.22056	1.96972	3.61696	3.04224	4.04726	3.33313	4.27585	4.08514	3.60459	-1.63376	-0.975953	-0.0977001	-0.328328	0.0911435	-0.251738	94.5892	149.81	276.21	235.256	314.978	248.138	316.421	302.68	267.8	95	149	289	239	335	251	308	287	254
Klf6	NM_011803	23849	chr13	Kruppel-like factor 6	2280	25.7653	0.545768	0.264538	0.734486	3.05322e-09	0.00429009	1.15132e-15	1.66135e-06	0.0679626	3.60218e-13	27.1772	29.0051	22.4154	23.7518	31.0913	33.5168	18.3297	20.8348	20.6073	0.511801	0.578618	0.212733	0.314373	0.711956	0.756292	4890.81	5122.7	3974.96	4265.17	5618.82	5794.21	3149.82	3584.66	3555.09	4912	5095	4159	4333	5976	5861	3066	3399	3372
Klf9	NM_010638	16601	chr19	Kruppel-like factor 9	2255	33.7027	0.4129	0.826935	0.60496	0.0294607	1.16419e-05	0.00137545	0.32229	0.000841849	0.0244167	30.6397	32.8428	38.6857	45.7502	47.275	25.3422	22.1358	26.95	24.9658	0.37578	0.448864	0.690884	0.950935	1.00742	0.04406	4266.52	4488.27	5308.22	6356.91	6610.78	3389.92	2943.33	3587.82	3332.63	4285	4464	5554	6458	7031	3429	2865	3402	3161
Klhl13	NM_026167	67455	chrX	kelch-like 13 (Drosophila)	6544	8.21033	-0.0515699	-0.532309	-0.404217	0.703823	0.000117698	0.00327127	0.951814	0.00511454	0.0465227	8.84186	9.58498	6.47375	6.71223	5.89154	8.72337	10.1045	9.35042	10.2023	-0.0968326	-0.00755568	-0.567364	-0.497128	-0.675897	-0.17418	1226.69	1305.06	885.019	929.222	820.81	1162.6	1338.62	1240.24	1356.88	1232	1298	926	944	873	1176	1303	1176	1287
Klhl21	NM_001033352	242785	chr4	kelch-like 21 (Drosophila)	5221	10.4121	-0.0897912	0.370976	0.227966	0.453939	0.00167454	0.0544089	0.87956	0.03487	0.288208	9.65024	7.87077	11.7987	12.3147	11.7725	10.2343	10.0196	9.63607	9.34254	0.061781	-0.259133	0.330391	0.410216	0.354487	0.0885942	1604.05	1283.94	1932.52	2042.52	1965.08	1634.16	1590.32	1531.31	1488.67	1611	1277	2022	2075	2090	1653	1548	1452	1412
Klhl24	NM_029436	75785	chr16	kelch-like 24 (Drosophila)	3735	9.53078	-0.234296	0.697413	0.305003	0.169214	2.9193e-05	0.069372	0.686033	0.00170724	0.327894	6.25629	7.47899	11.5153	14.6209	12.2486	7.76181	7.66172	8.70266	8.71515	-0.353975	-0.123636	0.504611	0.867101	0.620948	-0.100968	1784.27	2093.32	3236.16	4160.83	3508.01	2126.49	2086.53	2372.9	2382.71	1792	2082	3386	4227	3731	2151	2031	2250	2260
Klhl29	NM_001164493	208439	chr12	kelch-like 29 (Drosophila)	4325	7.5313	0.0338232	0.489476	0.375801	0.804971	0.000299134	0.00560818	0.970622	0.0101516	0.0667805	6.56882	6.35002	8.83384	8.86981	9.75411	6.69016	6.64348	6.54015	6.42548	0.0712617	-0.00464997	0.477257	0.50123	0.647481	0.0397336	1975.44	1874.14	2617.79	2661.67	2945.75	1932.72	1907.77	1880.39	1852.4	1984	1864	2739	2704	3133	1955	1857	1783	1757
Klhl9	NM_172871	242521	chr4	kelch-like 9 (Drosophila)	1872	29.6861	0.0445551	-0.178545	-0.256369	0.62513	0.0517298	0.00533151	0.937068	0.307552	0.0645923	31.2715	33.0072	26.1666	28.8223	24.5931	28.0898	31.7333	33.8051	31.2655	0.0188969	0.0697405	-0.259401	-0.101855	-0.321549	-0.193812	5627.62	5829.52	4640.16	5175.69	4444.47	4856.03	5453.11	5816.24	5393.78	5652	5798	4855	5258	4727	4912	5308	5515	5116
[truncated: 1,160 more rows]

## Sheet: Isl1-Ribotag DEG IP injury
	refSeq	entrez	chromosome	description	Rank	avg_fpkm	logFC_IP_4hr_vs_IP_naive	logFC_IP_12hr_vs_IP_naive	logFC_IP_24hr_vs_IP_naive	PValue_IP_4hr_vs_IP_naive	PValue_IP_12hr_vs_IP_naive	PValue_IP_24hr_vs_IP_naive	FDR_IP_4hr_vs_IP_naive	FDR_IP_12hr_vs_IP_naive	FDR_IP_24hr_vs_IP_naive	FPKM_Islt.4hr.DRG.IP.1	FPKM_Islt.4hr.DRG.IP.2	FPKM_Islt.4hr.DRG.IP.3	FPKM_Islt.12hr.DRG.IP.1	FPKM_Islt.12hr.DRG.IP.2	FPKM_Islt.12hr.DRG.IP.3	FPKM_Islt.24hr.DRG.IP.1	FPKM_Islt.24hr.DRG.IP.2	FPKM_Islt.24hr.DRG.IP.3	FPKM_Islt.Naive.DRG.IP.1	FPKM_Islt.Naive.DRG.IP.2	FPKM_Islt.Naive.DRG.IP.3	Islt.4hr.DRG.IP.1_vs_IP_naive	Islt.4hr.DRG.IP.2_vs_IP_naive	Islt.4hr.DRG.IP.3_vs_IP_naive	Islt.12hr.DRG.IP.1_vs_IP_naive	Islt.12hr.DRG.IP.2_vs_IP_naive	Islt.12hr.DRG.IP.3_vs_IP_naive	Islt.24hr.DRG.IP.1_vs_IP_naive	Islt.24hr.DRG.IP.2_vs_IP_naive	Islt.24hr.DRG.IP.3_vs_IP_naive	Islt.4hr.DRG.IP.1_normlizedCount	Islt.4hr.DRG.IP.2_normlizedCount	Islt.4hr.DRG.IP.3_normlizedCount	Islt.12hr.DRG.IP.1_normlizedCount	Islt.12hr.DRG.IP.2_normlizedCount	Islt.12hr.DRG.IP.3_normlizedCount	Islt.24hr.DRG.IP.1_normlizedCount	Islt.24hr.DRG.IP.2_normlizedCount	Islt.24hr.DRG.IP.3_normlizedCount	Islt.Naive.DRG.IP.1_normlizedCount	Islt.Naive.DRG.IP.2_normlizedCount	Islt.Naive.DRG.IP.3_normlizedCount	Islt.4hr.DRG.IP.1
[truncated: 2,818 more rows]
[truncated: 11 more columns]

[truncated: 1 more sheets: Dhh-Ribotag DEG IP injury]
