# Supplementary material for: Translatome Regulation in Neuronal Injury and Axon Regrowth
Source: eNeuro. 2018 May 10;5(2):ENEURO.0276-17.2018. doi: 10.1523/ENEURO.0276-17.2018 (PMC5944006; doi:10.1523/ENEURO.0276-17.2018)
Supplement: Extended Data Figure 3-2 — Transcripts that are translationally upregulated 12 and 24 h after injury and contain the CERT motif in their 5'UTR. The table lists transcript IDs, log fold change (LogFC), and FDR values for each time point after injury. Download Figure 3-2, XLSX file. [file sup_enu-eN-NWR-0276-17-s01.xlsx]

## Sheet: גיליון1
sequence name	4hr logFC	12hr logFC	24hr logFC	4hr FDR	12hr FDR	24hr FDR
Ptp4a2	0.0306264	0.176347	0.197844	0.984243	0.116479	0.0311154
Kcmf1	-0.155862	0.204916	0.112218	0.297699	0.0551924	0.322123
Mex3c	-0.385601	-0.022418	0.228179	0.000113945	0.932722	0.0286527
Ino80	-0.259499	-0.0018586	0.372752	0.459429	0.99819	0.0411062
Hsf2	0.13043	0.0569773	0.209654	0.675188	0.805106	0.0825374
Wasl	0.00977412	0.0118963	0.172712	0.997833	0.962037	0.0731829
B230219D22Rik	-0.102945	0.0993424	0.331438	0.728481	0.526814	0.000112384
Usp6nl	0.137464	0.1111	0.36146	0.651664	0.570462	0.000653029
Rac1	-0.0340477	0.119006	0.155916	0.971942	0.304537	0.0755559
Khdrbs3	-0.0729651	-0.11889	0.293188	0.96368	0.665533	0.06419
Lmo4	-0.0156681	0.311673	0.142366	0.996103	0.0301419	0.389657
Gpr85	-0.101613	-0.242822	0.563873	0.955732	0.388254	0.0010379
Txnrd3	0.0993373	0.189839	0.229419	0.866953	0.246585	0.0750057
Gsk3b	0.0441978	0.0377198	0.214306	0.96368	0.851348	0.0218354
Smg1	-0.0511386	-0.0472783	0.258489	0.968483	0.851653	0.0310139
Dnajb6	0.0184504	0.106636	0.241875	0.995318	0.503569	0.0122007
Etf1	-0.00631082	0.0396578	0.209459	0.997833	0.829257	0.0176411
Hnrnpu	0.225776	-0.0716201	0.270818	0.119334	0.731356	0.0105427
Apbb2	0.046451	-0.0126694	0.237758	0.964351	0.964337	0.0176472
Mtmr12	0.0616723	0.37492	0.143447	0.984243	0.0912649	0.58685
Btaf1	-0.040848	-0.325932	0.306734	0.991956	0.0397501	0.025392
Paf1	0.223087	0.0462575	0.267121	0.331025	0.880917	0.0622076
Ppp1cc	-0.151963	0.187828	0.263983	0.392562	0.125143	0.00469159
Fam102a	-0.0245182	0.4226	0.163174	0.995318	0.0594627	0.540292
Ammecr1l	-0.104073	-0.233632	0.225663	0.768297	0.0518862	0.0303061
Secisbp2l	0.220665	0.386075	0.0328438	0.659201	0.0884745	0.925202
Prss12	-0.117605	-0.0244347	0.423067	0.850959	0.945755	0.00064759
Areg	-0.504333	-0.798581	3.23775	0.828601	0.32999	2.4727e-14
Qser1	-0.393083	-0.153059	0.332684	0.00353585	0.436872	0.00599443
Ube2d1	0.0178642	0.367349	0.346354	0.995318	0.000381388	0.000258283
Sypl	-0.0304394	0.283448	0.0851171	0.995318	0.053613	0.650289
Usp47	0.230071	0.11334	0.292477	0.0859284	0.504143	0.00310667
Senp6	0.0617416	0.102126	0.233036	0.945637	0.554996	0.0264244
Bend5	0.175871	0.0548383	0.402092	0.874021	0.920349	0.0876185
Eogt	-0.0149085	-0.0307934	0.520092	0.997833	0.944192	0.000594273
Ppm1d	0.395581	0.581462	0.307446	0.367088	0.0407607	0.323287
Kif3b	0.0448142	-0.0280751	0.221275	0.96368	0.892526	0.0118184
Ythdf1	0.0776628	0.127541	0.166612	0.850964	0.322657	0.0870111
Bmper	0.141258	0.248419	0.29865	0.85025	0.271197	0.0922543
Sepn1	-0.235635	-0.313669	0.562469	0.574986	0.192432	0.000727044
Slain2	-0.12083	-0.00757565	0.275326	0.736557	0.983314	0.0144676
Slc22a23	-0.0800483	-0.119927	0.266262	0.922809	0.539605	0.0258374
Zfx	0.102607	0.344255	0.372413	0.910871	0.0360177	0.00803904
Bri3	-0.168643	0.356655	0.107123	0.643545	0.0208623	0.596215
Tlk2	0.135209	0.00618606	0.217641	0.595431	0.987158	0.0539911
Tbl1xr1	-0.0332565	0.151501	0.199725	0.982104	0.242963	0.0444185
Lsm14b	-0.00656707	0.109864	0.196068	0.997833	0.498918	0.0652717
Sh2b3	-0.136033	0.0228335	0.42523	0.948142	0.972676	0.083146
Ezr	0.145972	0.240592	0.84134	0.771881	0.213781	8.57852e-13
Yes1	-0.169328	-0.390566	0.454897	0.827048	0.0839323	0.0119231
March5	-0.0145496	0.196461	0.209289	0.995318	0.0792532	0.0258374
Rnf114	0.0683107	0.165244	0.310871	0.928076	0.252475	0.00168094
Tjp2	-0.248571	-0.0293281	0.825714	0.777205	0.96522	0.000145661
Gabpa	-0.0476278	0.147948	0.363165	0.980635	0.464669	0.00263919
Rab10	0.0432366	-0.00296952	0.180113	0.96368	0.991549	0.0433115
Ssfa2	-0.148197	0.44402	0.0823064	0.79156	0.00468831	0.729709
Zak	0.0444776	-0.021914	0.273862	0.983749	0.949628	0.0400684
Lhfp	-0.0715913	0.438755	-0.0218718	0.980935	0.0574218	0.954215
Sars	-0.0241559	0.065892	0.178142	0.992243	0.65644	0.0310586
2010300C02Rik	-0.0270519	0.518842	0.00545151	0.99573	0.0319054	0.992157
Nck2	0.221389	-0.00610483	0.603777	0.894367	0.996632	0.0487982
Calr	0.0862865	0.0322363	0.26658	0.876433	0.901866	0.0142012
Osbpl8	0.0646184	-0.00164119	0.253737	0.954685	0.997573	0.0319767
Dennd5b	0.0650792	-0.112704	0.304626	0.96368	0.62885	0.0186976
Phtf1	0.239661	0.0598447	0.327196	0.232945	0.826969	0.0113138
Top1	0.0376141	-0.436501	0.351253	0.995318	0.012219	0.0308648
Lrrfip2	-0.0911165	-0.000744026	0.24729	0.891449	0.998458	0.0492941
Phip	-0.0664188	-0.032351	0.370156	0.958611	0.916525	0.00137324
1810013L24Rik	-0.235812	-0.198013	0.213484	0.0519067	0.106091	0.0350977
Arhgap42	-0.0248547	0.0399627	0.573349	0.995318	0.931238	0.000421072
Pabpc1	-0.143095	0.191506	0.302259	0.690101	0.272262	0.0161752
Gprin1	0.205594	0.156389	0.275747	0.357923	0.429408	0.0368529
Maf1	0.126289	0.382531	-0.0030748	0.899544	0.0574218	0.993383
Kdm4c	0.0329374	-0.031683	0.33414	0.995318	0.936057	0.0328008
Esco1	-0.306663	0.0618754	0.238122	0.0524195	0.814747	0.0813818
Tle1	0.092194	0.346028	0.165503	0.867761	0.00298278	0.206215
Crkl	-0.0447264	-0.0385213	0.193982	0.964971	0.855685	0.0613613
Ptk2	0.261219	-0.128762	0.307604	0.071501	0.491846	0.00573733
Tfdp1	0.0973344	0.316599	0.0598408	0.908036	0.0417546	0.789451
Ptma	0.00201652	0.248993	0.190777	0.997833	0.0214821	0.0651348
Fam102b	-0.0145912	0.110217	0.217102	0.995318	0.398536	0.0101794
Brd1	0.283327	0.361479	0.381556	0.132028	0.0173797	0.00374025
Gpsm2	0.0844815	0.372384	0.137319	0.964351	0.0917378	0.602664
H2afy	0.0678973	0.223162	0.145409	0.932481	0.0854225	0.25913
Eif4e2	-0.000270232	-0.00786151	0.231235	0.999666	0.978193	0.0154317
Tor1aip2	-0.00599459	0.0453704	0.216233	0.997833	0.821897	0.0265666
Canx	0.064498	0.0642181	0.175884	0.883084	0.677402	0.0415421
Spata5	0.190559	-0.150557	0.333743	0.738524	0.65106	0.0862797
Hmgn1	-0.0858574	0.195973	0.382294	0.969965	0.558468	0.0724687
N4bp1	-0.154074	-0.178424	0.249858	0.511153	0.239822	0.0266326
Kat7	0.10568	0.0913977	0.254683	0.682608	0.554343	0.00390676
Tab2	-0.328571	0.27134	0.140811	0.0195542	0.0608047	0.369335
Dazap1	0.192936	0.34315	0.182405	0.297699	0.00365525	0.157042
Stag1	-0.0422038	0.197812	0.345949	0.995182	0.414217	0.032828
Nufip2	-0.0357233	-0.0317805	0.304927	0.98174	0.891409	0.0010317
Tmem57	0.0466884	0.24899	0.276273	0.964351	0.0274837	0.004013
Ogt	0.108441	-0.0095343	0.186992	0.748588	0.975049	0.0987701
Zfp251	-0.00626195	0.058842	0.323655	0.997833	0.836341	0.0154683
Enc1	0.225528	0.293232	0.408827	0.515564	0.168263	0.0112479
Vcl	0.150856	0.0733656	0.325078	0.558917	0.740237	0.00272468
Efna1	-0.137151	0.0914944	0.273758	0.749714	0.715231	0.0449514
Erc2	-0.0285969	0.00864365	0.197735	0.995155	0.978164	0.0813818
Csnk1g3	-0.058471	0.118881	0.274249	0.946366	0.434983	0.00330437
Zbtb46	0.244098	0.350289	0.405213	0.6089	0.169864	0.0490176
Vps54	-0.310279	-0.110687	0.296376	0.145215	0.702935	0.0675495
Fyn	0.0363479	0.252503	0.166588	0.992402	0.0891869	0.256263
Agfg1	-0.0477997	-0.0760226	0.215615	0.96368	0.684481	0.037542
Nhlrc2	-0.156582	-0.127585	0.484405	0.909006	0.770725	0.0274614
Ncmap	0.0534701	1.78444	0.467246	0.997833	0.00279683	0.566836
Smek1	-0.370623	0.0837617	0.275234	0.038796	0.777396	0.0813226
Prdm4	-0.154077	-0.0293381	0.22385	0.405684	0.902053	0.0275734
Sh3rf1	0.0719507	0.13531	0.310926	0.964971	0.630593	0.0607005
Lamb1	0.165145	0.399077	0.411757	0.82345	0.056694	0.0216019
Cyp51	0.121002	-0.0978863	0.665065	0.928076	0.79432	5.6703e-05
Ilf3	0.15885	0.126286	0.219511	0.523059	0.506433	0.0805007
Mthfr	-0.274471	-0.364015	0.255123	0.15322	0.0164768	0.0813818
C2cd2	-0.00459975	-0.142398	0.324332	0.997833	0.408381	0.00223494
Rgs19	0.018394	-0.113386	0.390016	0.997833	0.738464	0.0277522
Slc7a2	-0.0735091	1.06002	-0.00237248	0.995318	0.0447853	0.997576
Fam189a2	-0.00427684	0.387038	-0.0844163	0.997833	0.0780524	0.775595
Patl1	-0.579983	0.0465469	0.288141	3.72979e-05	0.889494	0.0596525
Chsy1	0.277812	0.345682	0.256517	0.122824	0.0195119	0.0737098
Usp38	0.231611	0.147012	0.253622	0.180126	0.428118	0.0416446
Ddx10	0.253725	0.088623	0.356568	0.108017	0.693413	0.00137609
Ppp1r13l	0.0626485	0.201195	0.490903	0.993139	0.607697	0.0302736
Ripk2	0.0293514	0.634722	0.412742	0.997833	0.0328725	0.170021
Pla2g12a	-0.0746037	0.306988	0.111231	0.954296	0.0440004	0.553591
D1Ertd622e	0.16613	0.24403	0.139769	0.414261	0.0580214	0.299683
Fndc3a	-0.0234666	-0.259893	0.29403	0.995318	0.0971434	0.0208476
Plod1	0.115688	0.031573	0.626091	0.96368	0.961938	0.00634583
Birc5	-0.0189835	0.202185	0.499117	0.997833	0.683672	0.0785564
Chd1	-0.509818	-0.0206048	0.40388	0.000322864	0.95853	0.00219882
Adarb1	0.103205	-0.00573998	0.224052	0.797017	0.988596	0.0411062
Bdp1	0.0028141	-0.291155	0.337424	0.997833	0.0343097	0.00276536
Pag1	-0.0258661	0.311496	0.456784	0.995318	0.0393949	0.000111052
Triobp	0.285882	0.496134	0.59786	0.63052	0.0797353	0.00902729
H3f3a	0.0793867	0.275972	-0.051329	0.948142	0.0929613	0.821786
Cacna2d1	0.124564	0.0482332	0.23218	0.785357	0.860594	0.0870494
Zfp664	-0.0721534	0.0991313	0.321897	0.859755	0.460923	1.73286e-05
Ttpal	-0.0731107	-0.122115	0.205471	0.928076	0.504755	0.0913152
Atxn7	-0.119009	0.472272	0.465152	0.955732	0.0686097	0.038708
Deptor	-0.0161834	0.0221764	0.182255	0.995318	0.926071	0.0716151
Mdm2	-0.218979	0.150536	0.467985	0.173426	0.35835	9.91199e-07
Uhrf2	0.0696933	-0.101936	0.416482	0.961614	0.684481	0.000783946
Scyl3	0.0633878	0.168587	0.306996	0.971751	0.486608	0.0520903
Wtip	0.176124	0.657902	0.673622	0.955732	0.0884745	0.0411648
Zfp451	0.201865	0.168583	0.311652	0.289113	0.309913	0.00587921
Gdap2	-0.0830358	0.0815004	0.21215	0.891449	0.690766	0.0681129
Traf6	-0.131248	0.127854	0.259052	0.759425	0.542469	0.0510045
P4ha1	-0.101004	-0.0691284	0.424073	0.941937	0.84633	0.00864876
Pcnt	0.197541	0.180079	0.312388	0.630301	0.491846	0.0718106
Slc7a7	-0.0376964	0.0062583	0.25558	0.992402	0.989235	0.0553783
Eri1	0.060516	0.10556	0.379362	0.971942	0.702935	0.00728813
Dusp7	-0.0148843	0.0583872	0.422686	0.997833	0.87984	0.0107877
Ip6k2	-0.100651	0.0330195	0.192396	0.734052	0.877197	0.0522352
Rnf34	-0.0342206	-0.016779	0.289195	0.992451	0.958951	0.0107877
Usp1	0.181736	0.238227	0.567932	0.754366	0.353797	0.000351006
Nfkbia	-0.35153	0.640921	-0.0889384	0.282539	0.00166811	0.789292
Abhd5	-0.140414	-0.0711809	0.286883	0.56607	0.731418	0.00529087
Cdc42se1	-0.0336536	-0.103272	0.206261	0.98909	0.570462	0.0707458
Pum2	-0.048457	0.0617428	0.247072	0.96368	0.73717	0.00768631
Mcmbp	0.0945567	0.0925112	0.376056	0.932246	0.749398	0.0093712
Pear1	0.0610337	-0.233509	0.394856	0.993734	0.520985	0.0963026
4930402H24Rik	0.121529	-0.109864	0.513662	0.928076	0.770489	0.00411298
Whsc1l1	-0.00641526	0.00471754	0.25303	0.997833	0.989987	0.0296682
Suv420h1	-0.238616	0.0836936	0.227336	0.195272	0.727976	0.0914336
Rbbp6	0.051788	0.258792	0.302335	0.986365	0.22099	0.0724548
Pak2	0.0500564	-0.0817436	0.33628	0.974532	0.737583	0.00557114
Setd2	0.222213	-0.0324281	0.252873	0.339681	0.92453	0.0836001
Rnf217	0.0595955	0.437962	0.203191	0.980635	0.0103593	0.302866
Sqle	0.110245	-0.14016	0.241587	0.832548	0.480915	0.0659544
Rbm39	0.166753	0.072521	0.277967	0.457222	0.743932	0.0142012
Ube2q2	-0.0930334	0.0371015	0.306393	0.859004	0.881222	0.00309228
Dnajc7	0.0365891	0.147575	0.336339	0.980635	0.280652	0.000143376
Rps6ka1	0.0531996	-0.050276	0.354319	0.995155	0.918204	0.0966285
Snrnp70	0.300337	0.195813	0.376012	0.0242304	0.201511	0.00033209
Zfp131	-0.0956433	0.152103	0.263772	0.906031	0.46933	0.0592662
Ahcy	-0.0465681	0.229608	0.303794	0.989678	0.271591	0.0575563
Dag1	0.110628	0.429021	0.0877379	0.939779	0.0372527	0.763286
Fbxo42	0.0962522	0.0201859	0.227024	0.855467	0.945755	0.0551367
Mtf1	-0.080553	0.124567	0.249656	0.925792	0.530403	0.0483741
Uimc1	-0.0114779	0.140902	0.358495	0.997833	0.607697	0.0222303
Zfp90	0.0908947	0.28198	0.325241	0.927377	0.0929613	0.0180859
Bag3	-0.00574978	-0.0612013	0.234491	0.997833	0.794052	0.0537382
Otub2	0.00466863	-0.0783739	0.314305	0.997833	0.80003	0.0445957
Rab31	-0.350846	0.266982	0.794186	0.429821	0.467049	0.000124213
Dennd4a	-0.102343	-0.0825274	0.278701	0.763297	0.651546	0.0032663
Dnajb4	0.00566552	0.0368853	0.402146	0.997833	0.881799	2.88472e-05
Incenp	0.135685	-0.209911	0.323121	0.883084	0.451323	0.0864646
Arglu1	-0.119858	0.236186	0.381423	0.832685	0.177165	0.00258749
Prdm2	-0.107266	0.0635992	0.280129	0.679842	0.722189	0.00125828
Dek	-0.0398519	0.381408	0.30053	0.990257	0.00535264	0.0221669
Tbc1d9	0.123462	0.0414487	0.178482	0.515801	0.825512	0.0610952
Cryab	0.069377	0.475309	0.158407	0.981628	0.0287905	0.56427
Serp1	0.0954827	0.399005	0.102475	0.928076	0.0129276	0.64018
Tmf1	-0.000553776	0.144326	0.188457	0.999435	0.246929	0.0492854
Egflam	0.0452939	-0.00924716	0.369926	0.995318	0.98932	0.0914747
Zpr1	-0.0479503	0.0532167	0.22912	0.969965	0.820117	0.0506431
Mybl1	0.118004	0.216596	0.428108	0.90329	0.360522	0.00573733
E130309D14Rik	0.0654737	0.309731	0.234602	0.963237	0.0321627	0.089194
Foxj2	0.17672	0.0495182	0.2716	0.523059	0.862609	0.0448047
Pdia3	0.0938101	0.101347	0.202746	0.825	0.54958	0.0592662
Rnf185	-0.110656	0.181846	0.273846	0.774562	0.216547	0.0110037
M6pr	0.0120652	0.0908965	0.21403	0.995318	0.54958	0.018878
Cep120	0.108989	-0.0933155	0.25305	0.711387	0.583388	0.00860078
BC022687	0.0311233	0.387857	0.204399	0.995318	0.0663071	0.372155
Gpbp1	-0.0318807	0.115044	0.20781	0.991956	0.506114	0.0664395
Nin	-0.355455	0.140303	0.29303	0.0634176	0.596593	0.0716151
5031439G07Rik	-0.175228	-0.0799742	0.283566	0.411678	0.715019	0.0116778
Arih1	-0.0753093	0.0204318	0.20495	0.865838	0.929884	0.0246786
Chmp1b	-0.250444	-0.290662	0.691919	0.387177	0.160261	4.54109e-07
Dnajc3	0.111088	0.101941	0.289166	0.712682	0.54199	0.00238418
Tmem68	0.0472943	0.115521	0.236901	0.979195	0.592479	0.0750057
Fbxo4	0.136302	0.222713	0.556121	0.941937	0.553412	0.0114363
Lypd6b	-0.0447605	0.32004	-0.10246	0.98909	0.0510582	0.622373
Stk17b	0.24744	0.445985	0.93397	0.750947	0.136412	3.79731e-06
Fem1b	0.0877144	-0.0320943	0.216206	0.815843	0.87965	0.020816
Rnd1	0.0624346	-0.197086	1.47322	0.995318	0.794052	2.59081e-06
Gpc3	0.0610074	0.516067	0.239735	0.995318	0.0982707	0.491974
Ptpro	0.232535	0.245097	0.624529	0.639895	0.404112	0.000372347
Laptm4b	-0.0423924	0.0629274	0.2136	0.968483	0.732996	0.0279432
Arf2	-0.00528888	-0.004251	0.267679	0.997833	0.992685	0.0752298
Bmp2k	-0.129505	0.23258	0.331152	0.913139	0.405402	0.0970043
Rock1	0.207335	0.422312	0.493707	0.822034	0.13229	0.0289471
Fam104a	0.0223569	0.311338	0.166558	0.995318	0.0232545	0.262529
Dclk3	0.139538	0.100018	0.40344	0.549008	0.579006	1.15302e-05
Hbs1l	0.05729	0.0488228	0.18151	0.947147	0.806048	0.0812528
Plk3	0.0424548	-0.128876	0.316284	0.990893	0.602012	0.0255344
Slc46a3	-0.0563327	-0.231113	0.737638	0.995318	0.633	0.00288412
Arf6	0.0746944	0.153994	0.310822	0.928076	0.363147	0.00480342
Mkl1	0.139419	-0.0891258	0.26786	0.728694	0.722189	0.0488724
Stk3	0.100012	0.133077	0.51598	0.955732	0.695512	0.00243365
Gdpd1	0.100879	0.103678	0.18281	0.768751	0.524383	0.0893117
Slc25a28	-0.0634789	0.303857	0.279547	0.965223	0.0663071	0.0583246
Ippk	0.202414	0.183298	0.301883	0.419342	0.34782	0.0263531
Ggnbp2	0.0974658	0.122599	0.275842	0.781175	0.411246	0.00288532
Hip1r	0.232674	0.0323375	0.213582	0.145215	0.905902	0.0864646
Irf1	-0.203388	1.00063	0.571245	0.957899	0.0172731	0.195309
Usp18	0.166786	-0.214639	1.23389	0.98174	0.829548	0.00803335
Srsf2	0.0938947	0.284247	0.20266	0.828601	0.0117575	0.066918
Smco4	-0.316699	-0.385995	0.8397	0.913925	0.640063	0.0754284
Herpud1	0.0698214	0.34553	0.331642	0.941937	0.00393471	0.00215282
Trnp1	-0.106375	0.180864	-0.0198414	0.628189	0.0884745	0.898681
Scyl2	0.0165982	0.0224943	0.2818	0.995318	0.94449	0.0217111
Pdcd6ip	0.135981	0.0210866	0.191311	0.392473	0.923994	0.0327144
Nabp1	-0.1424	-0.787519	1.0082	0.972105	0.058414	0.00189933
Dusp26	0.00745975	0.219024	-0.0136401	0.997833	0.0976011	0.947236
Bnip2	-0.0526541	0.36807	0.3988	0.976844	0.0118912	0.00160396
Fscn1	-0.0785325	0.41273	0.172763	0.976663	0.0884468	0.537626
Scg3	0.0227626	0.0468832	0.224486	0.995318	0.806048	0.0150253
Gabra5	-0.065544	0.251804	0.600734	0.976663	0.271309	4.01912e-05
Lime1	0.1947	0.519324	0.112632	0.866538	0.0606831	0.77073
Nus1	0.00998672	0.155268	0.207344	0.997833	0.21761	0.030169
Tmem41b	-0.0868719	-0.0390823	0.300117	0.875093	0.87164	0.00373353
Ptpmt1	-0.19184	0.339092	0.102675	0.487134	0.0239315	0.600533
Bdh1	0.0565094	-0.0477494	0.224516	0.96368	0.848917	0.0669212
Mbd2	-0.222361	0.167911	0.184236	0.071501	0.19173	0.0776842
Galc	0.0856391	0.165934	0.206689	0.868135	0.241308	0.0615702
Limch1	0.112448	0.302962	0.661485	0.980635	0.553154	0.0354312
Hnrnpul2	0.091786	-0.0292467	0.159868	0.736557	0.88236	0.0875168
Ddx5	0.330789	0.104058	0.202495	0.000835071	0.517095	0.049481
Ythdf3	0.0546143	-0.0235049	0.178707	0.955732	0.924689	0.0959368
Clec2l	-0.0653685	0.227276	0.0394671	0.945693	0.088522	0.830793
Bcl10	0.00766281	0.351354	0.229536	0.997833	0.0375653	0.178783
Arnt	-0.270812	0.209131	0.335469	0.273697	0.344875	0.0309831
Bgn	-0.144522	1.24136	0.0270022	0.995318	0.0784826	0.984782
Ube2e2	-0.132349	0.209141	-0.00458364	0.577903	0.0934705	0.985314
Suv39h1	0.0191772	0.204299	0.212884	0.995318	0.176675	0.0897628
Slbp	0.029612	0.0517023	0.376336	0.995318	0.857669	0.00272468
Srrm1	0.25648	0.286477	0.0811718	0.231529	0.0943983	0.709742
Larp1b	-0.0372438	-0.0499208	0.310455	0.995182	0.87571	0.0319767
Creb1	-0.149939	-0.114146	0.50967	0.718326	0.648228	2.3566e-05
Fgd6	-0.278407	-0.0530412	0.432598	0.416186	0.902708	0.0157683
Aebp2	-0.244769	0.000549541	0.217673	0.141974	0.998865	0.0939777
Herc4	0.0225405	-0.15659	0.492684	0.995318	0.505391	0.000129103
Mga	-0.197348	-0.1091	0.26988	0.416186	0.642388	0.0442348
Cpsf6	0.0743275	0.214461	0.308556	0.941937	0.183829	0.0105545
Chtf8	0.0326158	-0.0689585	0.281348	0.995182	0.780845	0.0221669
Taf15	0.0293725	-0.0119277	0.278407	0.995318	0.975049	0.0368578
Poc1b	-0.109394	0.00710072	0.383163	0.937984	0.990125	0.0311554
Uspl1	0.0568301	0.00493516	0.260777	0.96368	0.989741	0.0267881
Sh3pxd2b	-0.520471	0.155315	0.620093	0.143749	0.756818	0.0140064
Fam107b	0.137275	0.19229	0.251258	0.521029	0.130582	0.011144
Slc22a5	-0.0414893	0.040514	0.455557	0.995318	0.933609	0.013414
Ankrd12	-0.0127945	0.0946037	0.363586	0.997833	0.751852	0.0174439
Cdc73	0.0461283	-0.150204	0.265933	0.98909	0.532436	0.0894729
Adam9	-0.0148237	0.00256983	0.167464	0.995318	0.992867	0.0752641
Ctcf	-0.0165703	-0.0544876	0.275262	0.995318	0.829134	0.0246616
Sema4c	0.443602	0.550723	0.37456	0.238569	0.0551924	0.185467
Sesn2	-0.0828762	0.0686121	0.669078	0.993139	0.92453	0.0189314
Ccdc134	-0.172689	0.0340326	0.589511	0.872943	0.952584	0.00316745
Msmo1	-0.0579451	-0.35984	0.398486	0.99313	0.165792	0.0603778
Fbxo8	-0.00102106	0.40397	0.129024	0.999435	0.00544896	0.501433
Ahctf1	0.126489	0.286572	0.478137	0.874021	0.156787	0.00105333
Zfand2b	0.0339513	0.289285	0.0863063	0.995318	0.0798897	0.682307
Prpf3	0.0455849	-0.1597	0.461431	0.995318	0.639924	0.0122752
Fads2	-0.0254966	-0.0792193	0.351115	0.995318	0.84097	0.0761643
Rsad1	-0.134266	-0.292379	0.464705	0.901499	0.239142	0.0085571
Sin3a	0.318203	0.120862	0.288261	0.149436	0.682751	0.0948629
Igfbp6	-0.127345	1.99865	0.348129	0.995318	0.00942796	0.761473
Mpp5	0.0711755	-0.0649096	0.210355	0.932481	0.773668	0.0813818
Prkx	-0.0148689	0.0227326	0.229206	0.995318	0.92115	0.0107019
Tgs1	0.0914981	-0.0172676	0.602135	0.925069	0.96425	1.85349e-07
Trp53inp2	-0.141321	-0.183464	0.181829	0.425035	0.119553	0.0688494
Plagl1	0.124988	0.113828	0.311104	0.688001	0.529825	0.00288473
Rab12	0.074055	0.753125	0.322586	0.981549	0.000162104	0.169862
Net1	0.181042	0.348821	0.584431	0.723401	0.0842943	8.28569e-05
Cnih4	-0.0472175	0.0887812	0.213337	0.969965	0.659112	0.0669319
Tiprl	0.124735	0.125871	0.271372	0.647554	0.437407	0.00752213
Parp12	0.24526	0.152651	0.542926	0.479343	0.618893	0.000566755
Gas2l3	-0.102641	0.361768	0.859243	0.964351	0.214363	4.71542e-06
Tapbp	0.0160793	0.137883	0.214698	0.995318	0.296357	0.023661
Camk2n2	-0.0299828	0.291611	0.094259	0.995318	0.0258049	0.574192
9430020K01Rik	-0.0953659	-0.0659638	0.452494	0.941937	0.843587	0.0019554
Jakmip2	0.0408989	-0.0788528	0.222076	0.971942	0.66042	0.0246786
Zcchc7	0.190489	0.566494	0.716781	0.76556	0.00324059	8.89083e-06
Pitpnc1	0.122826	0.0366512	0.194562	0.419785	0.827918	0.0160934
Pthlh	0.150269	0.000516701	0.852924	0.96368	0.999663	0.00249991
Slc25a20	0.0269086	0.0551606	0.297995	0.995318	0.852587	0.0354045
Txlng	0.0498619	0.00436598	0.31797	0.98174	0.992466	0.022944
2310022A10Rik	-0.0473902	-0.293993	0.334165	0.995193	0.240933	0.0901637
Avl9	0.15876	0.222114	0.256118	0.563367	0.154969	0.0414933
Slc37a1	-0.0224412	0.169919	0.327	0.995318	0.391916	0.0113864
Sec63	-0.00244548	0.0940246	0.189814	0.997833	0.607697	0.0927603
Exoc6b	-0.0149289	-0.171761	0.242082	0.997161	0.353984	0.0724548
Tmem127	0.0193826	0.112673	0.186338	0.995318	0.437407	0.0594094
Slc7a5	0.154429	0.397091	0.550747	0.827048	0.0419418	0.000375089
Smox	-0.130903	0.318413	0.746976	0.908726	0.181057	1.74224e-06
Kitl	0.138424	-0.00830686	0.228348	0.706265	0.983314	0.0907708
Csgalnact1	0.164883	0.29843	0.110239	0.641063	0.0665975	0.576589
Zfp963	-0.0222844	0.360475	0.661973	0.997833	0.439142	0.0295449
Pdgfrb	0.0271372	0.173178	0.404319	0.995318	0.60592	0.0405818
Mvk	0.0536495	-0.0318986	0.229328	0.964351	0.90805	0.0604057
Manf	-0.0402096	0.0792764	0.350488	0.995318	0.826277	0.0541487
Pde12	0.204402	0.0644574	0.273763	0.346437	0.802739	0.0335792
Apc	0.0875296	-0.046112	0.23485	0.885417	0.851348	0.0477166
Gnl3	-0.0660356	0.0911002	0.390418	0.955732	0.679322	0.000289889
Ankle2	0.165405	-0.114256	0.288124	0.581668	0.619081	0.0272534
Atad2	0.144441	0.0175794	0.239374	0.717611	0.961979	0.0959368
