# Supplementary material for: Translatome Regulation in Neuronal Injury and Axon Regrowth
Source: eNeuro. 2018 May 10;5(2):ENEURO.0276-17.2018. doi: 10.1523/ENEURO.0276-17.2018 (PMC5944006; doi:10.1523/ENEURO.0276-17.2018)
Supplement: Extended Data Figure 5-1 — Proteins with different translation rates in control and conditionally injured neurons. Proteins featuring at least two unique peptides with “heavy” lysine incorporation obtained from neurite enriched proteomes at 24, 30, and 48 h in culture. Download Figure 5-1, XLSX file. [file sup_enu-eN-NWR-0276-17-s04.xlsx]

## Sheet: Legend
	Proteins with different translation rates in control and conditionally injured neurons
	File contains proteins featuring at least 2 unique peptides with incorporation rate of "heavy" lysine analyzed from neurite enriched proteome from control and conditionally injured neurons 24h, 30h, 48h after plating.
UniRef90	Uniref90 Cluster identifier
Mean	In base 2 logarithmic values of H/L ratios
Median	In base 2 logarithmic values of H/L ratios
Std Dev	Calculated from the base 2 logarithmic values of H/L ratios
Std Err	Calculated from the base 2 logarithmic values of H/L ratios
Incorporation (%)	Represents incorporation of "heavy" lysine into newly synthesized proteins based on median of H/L ratio
N (all peptides)	Represents all identified unique peptides that met the acceptance criteria
N (quanti peptides)	Represents the number of peptide pairs used for quantification
Cluster name	Name of the UniRef90 cluster

## Sheet: control 24h
UniRef90	Mean	Median	Std Dev	Std Err	Incorporation (%)	N (all peptides)	N (quanti peptides)	Cluser Name
UniRef90_Q794F9	3.92474	3.96466	1.24713	0.623566	93.9806	7	4	4F2 cell-surface antigen heavy chain
UniRef90_P14901	2.98724	3.88897	1.70029	0.642647	93.6768	11	7	Heme oxygenase 1
UniRef90_P08226	3.3884	3.26541	0.37281	0.131808	90.5801	24	8	Apolipoprotein E
UniRef90_P21263	2.8269	2.69451	0.557957	0.131512	86.6191	40	18	Nestin
UniRef90_P70232	3.09166	2.59074	0.897524	0.518186	85.7633	6	3	Processed neural cell adhesion molecule L1-like protein
UniRef90_Q00238	2.552	2.552	1.11141	0.785887	85.4322	3	2	Intercellular adhesion molecule 1
UniRef90_P42892	-0.358333	2.39593	5.12078	2.95648	84.0336	6	3	Endothelin-converting enzyme 1
UniRef90_Q0VBD0	2.02534	2.35641	1.85243	0.756253	83.6626	8	6	Integrin beta
UniRef90_B5DF73	2.15362	2.15362	1.42102	1.00481	81.6494	4	2	Gbp5 protein (Fragment)
UniRef90_Q9ER67	2.14081	2.14081	0.286982	0.202927	81.516	3	2	Maged2 protein
UniRef90_P60880	2.06919	2.06919	0.713161	0.504281	80.7563	5	2	Synaptosomal-associated protein 25
UniRef90_Q99LJ0	1.86458	1.88897	0.534253	0.238925	78.7402	7	5	CTTNBP2 N-terminal-like protein
UniRef90_Q3TT04	1.76621	1.76621	0.121382	0.08583	77.281	5	2	Putative uncharacterized protein
UniRef90_Q99JC6	1.58814	1.58814	0.150156	0.106176	75.0413	3	2	Tap-binding protein (Tapasin)
UniRef90_Q5PPJ9	1.19664	1.19664	1.26237	0.892631	69.6238	4	2	Endophilin-B2
UniRef90_P70271	1.18633	1.18633	0.0394642	0.0279054	69.4725	7	2	PDZ and LIM domain protein 4
UniRef90_Q60780	1.15073	1.09542	0.165143	0.0953453	68.1199	9	3	Growth arrest-specific protein 7
UniRef90_Q9Y696	1.25926	1.03618	1.10616	0.451589	67.2216	7	6	Chloride intracellular channel protein 4
UniRef90_Q8R1F1	0.991789	0.991789	0.103419	0.0731286	66.5401	5	2	Niban-like protein 1
UniRef90_Q6PAN0	0.855501	0.855501	0.0701276	0.0495877	64.405	2	2	Spock2 protein
UniRef90_P10960	0.788333	0.846843	0.196542	0.113474	64.2674	4	3	Sulfated glycoprotein 1
UniRef90_P14562	-0.216434	0.821126	2.35555	1.35998	63.857	4	3	Lysosome-associated membrane glycoprotein 1
UniRef90_Q66H32	0.755854	0.755854	0.462855	0.327288	62.8063	3	2	RAN GTPase activating protein 1
UniRef90_Q5R1W9	0.542268	0.752128	0.753514	0.307621	62.746	9	6	L-lactate dehydrogenase A chain
UniRef90_Q8NFZ8	1.03558	0.687335	0.637216	0.367897	61.6903	9	3	Cell adhesion molecule 4
UniRef90_P00367	0.658803	0.658803	5.9673	4.21952	61.2219	4	2	Glutamate dehydrogenase 1, mitochondrial
UniRef90_Q63560	0.457179	0.457179	0.859472	0.607739	57.8567	9	2	Microtubule-associated protein 6
UniRef90_Q6NZI2	0.417362	0.413792	0.205672	0.102836	57.1217	7	4	Polymerase I and transcript release factor
UniRef90_Q8R2Y2	-0.318343	0.37707	1.79639	0.678972	56.4972	13	7	Cell surface glycoprotein MUC18
UniRef90_Q641P2	0.357376	0.357376	0.681232	0.481704	56.1614	5	2	Stau1 protein (Fragment)
UniRef90_P14873	0.199746	0.340075	0.890095	0.398062	55.8659	9	5	MAP1 light chain LC1
UniRef90_O08539	0.29646	0.29646	1.78182	1.25993	55.1193	4	2	Myc box-dependent-interacting protein 1
UniRef90_P57723	0.279747	0.279747	0.915163	0.647118	54.8325	3	2	Poly(rC)-binding protein 4
UniRef90_Q6UL10	0.207471	0.22847	0.165488	0.0675603	53.9508	8	6	AHNAK (Fragment)
UniRef90_Q8WUM4	-0.781195	0.21424	2.43922	1.40828	53.7057	4	3	Programmed cell death 6-interacting protein
UniRef90_P62910	0.327898	0.197964	2.83087	1.41544	53.4251	4	4	60S ribosomal protein L32
UniRef90_Q9Y2X7	0.17597	0.17597	3.17197	2.24292	53.0455	8	2	ARF GTPase-activating protein GIT1
UniRef90_Q99P72	0.0324957	0.164884	0.574464	0.173208	52.8541	14	11	Reticulon-4
UniRef90_P35221	0.142636	0.140826	0.393002	0.0786004	52.4384	38	25	Catenin alpha-1
UniRef90_Q09666	0.111754	0.111754	0.178346	0.12611	51.9356	2	2	Neuroblast differentiation-associated protein AHNAK
UniRef90_P19157	0.0966095	0.0966095	0.0828774	0.0586032	51.6735	4	2	Glutathione S-transferase P 1
UniRef90_O00629	0.0320212	0.0320212	0.183327	0.129632	50.5549	4	2	Importin subunit alpha-4
UniRef90_Q9UNZ2	0.341597	0.0319383	1.40763	0.703814	50.5534	11	4	NSFL1 cofactor p47
UniRef90_Q38PF9	0.0245269	0.0245269	0.0549878	0.0388822	50.425	2	2	AHNAK 1 (Fragment)
UniRef90_Q13283	-0.154259	0.0203404	0.640485	0.369784	50.3525	8	3	Ras GTPase-activating protein-binding protein 1
UniRef90_P62988	-0.0375408	0.011588	0.580955	0.259811	50.2008	6	5	Ubiquitin
UniRef90_Q5QD51	-0.152678	-0.0703893	0.343151	0.0886012	48.7805	24	15	A-kinase anchor protein 12
UniRef90_Q9QYR6	-0.270963	-0.0703893	0.464162	0.154721	48.7805	21	9	MAP1 light chain LC2
UniRef90_B7ZLX0	-0.291459	-0.137504	0.587986	0.339474	47.619	5	3	ITGAV protein
UniRef90_Q14444	-0.164131	-0.164131	0.380181	0.268828	47.1589	4	2	Caprin-1
UniRef90_A4D1M6	-0.217921	-0.217921	1.71832	1.21504	46.2309	2	2	HCG19809
UniRef90_O54901	-0.46772	-0.263034	0.397635	0.229575	45.4545	5	3	OX-2 membrane glycoprotein
UniRef90_Q62465	-0.247788	-0.286881	0.278408	0.124508	45.045	11	5	Synaptic vesicle membrane protein VAT-1 homolog
UniRef90_P07825	-0.266628	-0.31034	0.138995	0.0802486	44.6429	5	3	Synaptophysin
UniRef90_O88447	-0.236802	-0.321928	0.635055	0.211685	44.4444	9	9	Kinesin light chain 1
UniRef90_Q8K0T0	-0.368644	-0.368644	1.73369	1.2259	43.6464	4	2	Reticulon-1
UniRef90_Q3TIR3	-0.372683	-0.372683	0.0393925	0.0278547	43.5776	3	2	Synembryn-A
UniRef90_P36543	-0.394502	-0.394502	0.896707	0.634068	43.2061	3	2	V-type proton ATPase subunit E 1
UniRef90_Q16186	-0.40516	-0.40516	0.0693192	0.049016	43.0249	5	2	Proteasomal ubiquitin receptor ADRM1
UniRef90_Q8C788	-0.489464	-0.489464	0.0799094	0.0565045	41.5987	5	2	Putative uncharacterized protein
UniRef90_Q8VI36-2	-0.303688	-0.495695	0.447302	0.25825	41.4938	5	3	Isoform Alpha of Paxillin
UniRef90_Q62417	-0.501225	-0.501225	0.589955	0.417161	41.4008	5	2	Sorbin and SH3 domain-containing protein 1
UniRef90_Q9Y371	-1.23863	-0.526069	2.35526	1.35981	40.9836	7	3	Endophilin-B1
UniRef90_O35685	-0.55491	-0.529262	0.423138	0.211569	40.9301	4	4	Nuclear migration protein nudC
UniRef90_O35520	-0.538786	-0.538786	1.09114	0.771555	40.7706	3	2	5I2 antigen (Fragment)
UniRef90_P52306	-0.770396	-0.565597	0.656586	0.293634	40.3226	7	5	Rap1 GTPase-GDP dissociation stimulator 1
UniRef90_Q92783	-0.578964	-0.606565	0.265464	0.132732	39.6412	5	4	Signal transducing adapter molecule 1
UniRef90_P34897	-0.609391	-0.609391	0.279964	0.197964	39.5943	7	2	Serine hydroxymethyltransferase, mitochondrial
UniRef90_P30999	-0.628747	-0.628747	0.217311	0.153662	39.2739	13	2	Catenin delta-1
UniRef90_P07355	-0.629019	-0.650765	0.226442	0.0494137	38.9105	37	21	Annexin A2
UniRef90_P27214	-0.650794	-0.650794	0.162268	0.114741	38.91	8	2	Annexin A11
UniRef90_Q8NC51	-0.679817	-0.679817	0.260387	0.184122	38.4329	3	2	Plasminogen activator inhibitor 1 RNA-binding protein
UniRef90_P37837	-0.717138	-0.687061	0.188022	0.108555	38.3142	3	3	Transaldolase
UniRef90_P50454	-0.992392	-0.709122	1.10335	0.31851	37.9534	20	12	Serpin H1
UniRef90_P52594	-0.743846	-0.743846	0.0426389	0.0301503	37.3883	3	2	Arf-GAP domain and FG repeats-containing protein 1
UniRef90_P04075	-0.679714	-0.756998	0.428954	0.135647	37.1751	19	10	Fructose-bisphosphate aldolase A
UniRef90_P13471	-1.14961	-0.765535	0.844326	0.487472	37.037	8	3	40S ribosomal protein S14
UniRef90_Q14974	-0.634176	-0.765535	0.419231	0.187486	37.037	5	5	Importin subunit beta-1
UniRef90_Q02750	-0.773602	-0.773602	0.0477345	0.0337534	36.9067	3	2	Dual specificity mitogen-activated protein kinase kinase 1
UniRef90_Q66HL2	-0.6093	-0.792289	0.62305	0.254359	36.6056	8	6	Cortactin
UniRef90_Q562B2	-0.798801	-0.798801	0.222393	0.157255	36.5009	3	2	Pls3 protein (Fragment)
UniRef90_P05556	-0.998815	-0.823749	0.487864	0.147097	36.1011	17	11	Integrin beta-1
UniRef90_Q9ESN0	-0.804715	-0.831854	0.330067	0.0703705	35.9716	41	22	Protein Niban
UniRef90_Q15417	-0.879342	-0.831877	0.395134	0.0987835	35.9712	29	16	Calponin-3
UniRef90_Q9H223	-0.939262	-0.847462	0.46983	0.234915	35.7228	5	4	EH domain-containing protein 4
UniRef90_P08670	-0.834337	-0.85599	0.516125	0.0848505	35.5872	80	37	Vimentin
UniRef90_Q7L099	-0.876836	-0.876836	1.95612	1.38319	35.2567	5	2	Protein RUFY3
UniRef90_Q92597	-1.04134	-0.910733	0.552167	0.208699	34.7222	15	7	Protein NDRG1
UniRef90_P54578	-0.911814	-0.911814	0.194903	0.137817	34.7052	8	2	Ubiquitin carboxyl-terminal hydrolase 14
UniRef90_Q9D0L7	-0.940725	-0.940725	2.34224	1.65621	34.2525	4	2	Armadillo repeat-containing protein 10
UniRef90_P23528	-1.37316	-0.941106	0.802096	0.46309	34.2466	4	3	Cofilin-1
UniRef90_Q15019	-0.962031	-0.962031	0.718215	0.507855	33.9207	6	2	Septin-2
UniRef90_P54920	-0.591714	-0.966371	1.11525	0.557625	33.8533	10	4	Alpha-soluble NSF attachment protein
UniRef90_Q13177	-0.753794	-0.971454	0.650323	0.265493	33.7745	10	6	PAK-2p34
UniRef90_O94826	-0.978604	-0.978604	1.32365	0.93596	33.6637	5	2	Mitochondrial import receptor subunit TOM70
UniRef90_P51665	-1.00007	-1.00007	0.6422	0.454104	33.3322	3	2	26S proteasome non-ATPase regulatory subunit 7
UniRef90_A2ATK9	-0.910761	-1.0072	0.653775	0.377457	33.2226	5	3	Family with sequence similarity 171, member A1
UniRef90_P62191	-0.850315	-1.01436	0.358574	0.160359	33.1126	6	5	26S protease regulatory subunit 4
UniRef90_Q8R1X6	-1.01492	-1.01492	0.425996	0.301225	33.1039	3	2	Spartin
UniRef90_Q9H444	-1.01552	-1.01552	0.839036	0.593288	33.0947	3	2	Charged multivesicular body protein 4b
UniRef90_P13674	-1.07645	-1.03556	0.0971223	0.0485611	32.7879	6	4	Prolyl 4-hydroxylase subunit alpha-1
UniRef90_P14550	-0.803567	-1.04346	0.75554	0.37777	32.6673	6	4	Alcohol dehydrogenase [NADP+]
UniRef90_P38646	-1.04956	-1.04827	0.411937	0.168173	32.5941	13	6	Stress-70 protein, mitochondrial
UniRef90_Q13765	-1.25314	-1.04963	0.651301	0.246169	32.5733	7	7	Nascent polypeptide-associated complex subunit alpha
UniRef90_P68104	-1.99973	-1.07039	2.10807	1.21709	32.2581	4	3	Elongation factor 1-alpha 1
UniRef90_Q15365	-1.12642	-1.09085	0.0994683	0.057428	31.9489	5	3	Poly(rC)-binding protein 1
UniRef90_P13596	-0.890546	-1.09761	0.665539	0.297638	31.8471	8	5	Neural cell adhesion molecule 1
UniRef90_P36578	-1.32205	-1.10434	0.546671	0.244479	31.746	13	5	60S ribosomal protein L4
UniRef90_P49368	-1.12775	-1.11097	0.509145	0.18001	31.6465	13	8	T-complex protein 1 subunit gamma
UniRef90_P53990	-1.18034	-1.11103	0.137892	0.0796117	31.6456	4	3	IST1 homolog
UniRef90_O60884	-1.12487	-1.12487	0.126219	0.0892504	31.4384	4	2	DnaJ homolog subfamily A member 2
UniRef90_Q9UDT6	-1.13413	-1.13413	0.0232388	0.0164323	31.3003	7	2	CAP-Gly domain-containing linker protein 2
UniRef90_P33176	-1.16974	-1.14187	0.404654	0.202327	31.185	11	4	Kinesin-1 heavy chain
UniRef90_Q00169	-1.20374	-1.14405	0.133013	0.0767953	31.1526	3	3	Phosphatidylinositol transfer protein alpha isoform
UniRef90_P62333	-0.952832	-1.14501	0.752032	0.376016	31.1384	7	4	26S protease regulatory subunit S10B
UniRef90_Q99733	-1.13032	-1.15065	1.23973	0.619866	31.0546	5	4	Nucleosome assembly protein 1-like 4
UniRef90_P16330	-0.863771	-1.15668	0.809292	0.255921	30.9651	14	10	2&apos;,3&apos;-cyclic-nucleotide 3&apos;-phosphodiesterase
UniRef90_O43707	-1.20134	-1.16668	0.201455	0.0637057	30.8171	18	10	Alpha-actinin-4
UniRef90_O54922	-1.19746	-1.19746	0.773148	0.546698	30.3641	3	2	Exocyst complex component 7
UniRef90_O00231	-0.886934	-1.22651	0.593496	0.342655	29.9401	4	3	26S proteasome non-ATPase regulatory subunit 11
UniRef90_P25786	-0.482451	-1.22651	1.57705	0.70528	29.9401	7	5	Proteasome subunit alpha type-1
UniRef90_Q9JM96	-1.38235	-1.23879	0.527882	0.304773	29.7619	5	3	Cdc42 effector protein 4
UniRef90_Q15691	-1.23123	-1.24767	0.0744798	0.0372399	29.6334	7	4	Microtubule-associated protein RP/EB family member 1
UniRef90_P26453	0.0664655	-1.26303	3.25409	1.45528	29.4118	8	5	Basigin
UniRef90_P53798	-1.24267	-1.28096	0.190804	0.110161	29.1545	8	3	Squalene synthetase
UniRef90_P40240	-1.2885	-1.2885	0.204292	0.144457	29.0466	2	2	CD9 antigen
UniRef90_P09671	-1.31259	-1.31259	0.0615965	0.0435553	28.7037	4	2	Superoxide dismutase [Mn], mitochondrial
UniRef90_Q5M7W5	-1.34115	-1.31615	0.461785	0.105941	28.6533	26	19	Microtubule-associated protein 4
UniRef90_Q15907	-1.31834	-1.31869	0.0518489	0.0259245	28.6173	9	4	Ras-related protein Rab-11B
UniRef90_Q9JLQ0	-1.03909	-1.32193	0.574045	0.331425	28.5714	4	3	CD2-associated protein
UniRef90_Q9CYZ2	-1.32527	-1.32527	0.511653	0.361793	28.5242	3	2	Tumor protein D54
UniRef90_P27635	-1.27602	-1.34483	0.174842	0.100945	28.2486	5	3	60S ribosomal protein L10
UniRef90_O76031	-1.35219	-1.35219	1.04462	0.738661	28.1452	2	2	ATP-dependent Clp protease ATP-binding subunit clpX-like, mitochondrial
UniRef90_Q14203	-1.33637	-1.35694	0.244355	0.0997575	28.0788	14	6	Dynactin subunit 1
UniRef90_Q16543	-1.35953	-1.35953	0.757703	0.535777	28.0426	3	2	Hsp90 co-chaperone Cdc37
UniRef90_P30153	-1.36485	-1.36485	0.455671	0.322208	27.9681	9	2	Serine/threonine-protein phosphatase 2A 65 kDa regulatory subunit A alpha isoform
UniRef90_Q29099	-1.36819	-1.36819	0.561924	0.397341	27.9215	4	2	Polypyrimidine tract-binding protein 1
UniRef90_P50502	-1.68139	-1.37851	1.09577	0.490045	27.7778	6	5	Hsc70-interacting protein
UniRef90_Q61490	-1.07074	-1.38742	0.864134	0.352781	27.6541	10	6	CD166 antigen
UniRef90_Q62418	-0.671285	-1.40599	1.43034	0.82581	27.3973	6	3	Drebrin-like protein
UniRef90_P51660	-1.44283	-1.44283	0.187364	0.132486	26.8924	3	2	3-alpha,7-alpha,12-alpha-trihydroxy-5-beta-cholest-24-enoyl-CoA hydratase
UniRef90_P10107	-1.45902	-1.45902	1.74304	1.23251	26.6722	2	2	Annexin A1
UniRef90_O70371	-1.47607	-1.47607	0.497443	0.351745	26.4417	3	2	Lipocortin V (Fragment)
UniRef90_P26645	-1.92947	-1.47623	1.50418	0.531807	26.4396	11	8	Myristoylated alanine-rich C-kinase substrate
UniRef90_P11940	-1.47942	-1.47942	0.222729	0.157493	26.3966	7	2	Polyadenylate-binding protein 1
UniRef90_P35637	-1.48557	-1.48557	1.03033	0.728551	26.3138	5	2	RNA-binding protein FUS
UniRef90_P52565	-1.51437	-1.49045	0.303606	0.151803	26.2483	6	4	Rho GDP-dissociation inhibitor 1
UniRef90_P08865	-1.55244	-1.49057	0.428494	0.191628	26.2467	14	5	40S ribosomal protein SA
UniRef90_P08133	-1.53629	-1.4909	1.05834	0.374179	26.2423	13	8	Annexin A6
UniRef90_Q9Y6G9	-1.49302	-1.49302	0.0253689	0.0179385	26.2138	4	2	Cytoplasmic dynein 1 light intermediate chain 1
UniRef90_Q62736	-1.44149	-1.50832	0.587633	0.131399	26.0093	28	20	Non-muscle caldesmon
UniRef90_P61981	-1.49915	-1.51602	0.375375	0.125125	25.9067	13	9	14-3-3 protein gamma, N-terminally processed
UniRef90_P00558	-1.58211	-1.52104	0.508743	0.135967	25.8399	22	14	Phosphoglycerate kinase 1
UniRef90_Q13561	-1.35567	-1.52607	0.659545	0.19886	25.7732	18	11	Dynactin subunit 2
UniRef90_P57776	-1.68654	-1.55582	0.318525	0.183901	25.3807	8	3	Elongation factor 1-delta
UniRef90_P83731	-1.10264	-1.57531	1.19853	0.691972	25.1256	4	3	60S ribosomal protein L24
UniRef90_P07900	-1.61174	-1.58976	0.247647	0.110751	24.9377	13	5	Heat shock protein HSP 90-alpha
UniRef90_O00303	-1.72165	-1.5964	0.553191	0.276596	24.8517	7	4	Eukaryotic translation initiation factor 3 subunit F
UniRef90_P08553	-1.28125	-1.61824	0.956735	0.427865	24.57	7	5	Neurofilament medium polypeptide
UniRef90_P19137	-1.12839	-1.61845	1.56109	0.780547	24.5674	15	4	Laminin subunit alpha-1
UniRef90_O15126	-1.55768	-1.64155	0.280424	0.161903	24.2718	3	3	Secretory carrier-associated membrane protein 1
UniRef90_Q9UNX3	-1.0248	-1.65249	1.52373	0.761866	24.1327	5	4	60S ribosomal protein L26-like 1
UniRef90_Q9QZR6	-1.90317	-1.6618	0.892902	0.257759	24.0147	23	12	Septin-9
UniRef90_P49006	-1.58869	-1.68229	1.11151	0.555754	23.7566	4	4	MARCKS-related protein
UniRef90_P16086	-1.31104	-1.69587	1.08606	0.44338	23.5865	19	6	Spectrin alpha chain, brain
UniRef90_P31948	-1.12316	-1.72683	1.76035	0.488232	23.2019	18	13	Stress-induced-phosphoprotein 1
UniRef90_Q9H115	-1.59408	-1.73118	0.48877	0.218584	23.1481	5	5	Beta-soluble NSF attachment protein
UniRef90_P25787	-1.76078	-1.76078	0.317807	0.224724	22.7852	4	2	Proteasome subunit alpha type-2
UniRef90_P54714	-1.10989	-1.76553	1.41921	0.634691	22.7273	7	5	Triosephosphate isomerase
UniRef90_P62829	-1.76596	-1.76596	0.611697	0.432535	22.7221	2	2	60S ribosomal protein L23
UniRef90_P55302	-1.76638	-1.76638	1.25395	0.886677	22.7169	5	2	Alpha-2-macroglobulin receptor-associated protein
UniRef90_P54577	-2.6884	-1.7866	2.10672	1.21632	22.4719	7	3	Tyrosyl-tRNA synthetase, cytoplasmic
UniRef90_Q9Y639	-1.78724	-1.78724	0.180058	0.12732	22.4641	2	2	Neuroplastin
UniRef90_P04406	-1.81307	-1.81307	0.500125	0.353642	22.1538	3	2	Glyceraldehyde-3-phosphate dehydrogenase
UniRef90_Q9UHB9	-1.81738	-1.81738	0.741899	0.524602	22.1023	6	2	Signal recognition particle 68 kDa protein
UniRef90_Q9QXY6	-1.88444	-1.82308	0.584958	0.292479	22.0344	6	4	EH domain-containing protein 3
UniRef90_P57759	-1.44186	-1.82375	2.33336	1.34717	22.0264	5	3	Endoplasmic reticulum resident protein 29
UniRef90_B0BN56	-1.83042	-1.83042	0.547035	0.386812	21.9471	3	2	28S ribosomal protein S31, mitochondrial
UniRef90_P61978	-1.90174	-1.848	0.455664	0.151888	21.7391	21	9	Heterogeneous nuclear ribonucleoprotein K
UniRef90_P49720	-1.85545	-1.85545	0.516018	0.36488	21.6514	2	2	Proteasome subunit beta type-3
UniRef90_Q9CYG7	-1.30666	-1.85599	1.12335	0.648565	21.645	8	3	Mitochondrial import receptor subunit TOM34
UniRef90_P62917	-1.81225	-1.8679	0.120893	0.0697975	21.5054	6	3	60S ribosomal protein L8
UniRef90_P40630	-1.87182	-1.87182	3.27255	2.31404	21.4595	2	2	Transcription factor A, mitochondrial
UniRef90_P08758	-1.88782	-1.88782	0.178948	0.126535	21.2732	3	2	Annexin A5
UniRef90_P52943	-1.90581	-1.90581	0.168597	0.119216	21.0651	4	2	Cysteine-rich protein 2
UniRef90_Q8NHW5	-2.50776	-1.91837	1.53478	0.542625	20.9207	11	8	60S acidic ribosomal protein P0-like
UniRef90_P09936	-1.7123	-1.91923	1.25983	0.398395	20.9108	13	10	Ubiquitin carboxyl-terminal hydrolase isozyme L1
UniRef90_P46778	-1.69646	-1.93734	0.664369	0.297115	20.7039	7	5	60S ribosomal protein L21
UniRef90_P17980	-1.97845	-1.97845	0.809572	0.572454	20.2401	3	2	26S protease regulatory subunit 6A
UniRef90_P10637	-2.07253	-1.98731	0.777111	0.224333	20.1411	14	12	Microtubule-associated protein tau
UniRef90_P61247	-1.91047	-1.9916	0.307025	0.0970899	20.0933	19	10	40S ribosomal protein S3a
UniRef90_Q9UN36	-2.0641	-2.0036	0.526501	0.303976	19.9601	5	3	Protein NDRG2
UniRef90_P70296	-2.00709	-2.00709	0.687367	0.486042	19.9215	3	2	Hippocampal cholinergic neurostimulating peptide
UniRef90_O60749	-1.76479	-2.0072	1.0964	0.414399	19.9203	14	7	Sorting nexin-2
UniRef90_Q96AG4	-2.02722	-2.02722	0.618651	0.437452	19.6999	3	2	Leucine-rich repeat-containing protein 59
UniRef90_Q4R5J9	-2.02881	-2.02881	0.244407	0.172822	19.6824	2	2	Brain cDNA, clone: QflA-11122, similar to human PEST-containing nuclear protein (PCNP),
UniRef90_P18669	-2.00083	-2.0321	0.208756	0.120526	19.6464	6	3	Phosphoglycerate mutase 1
UniRef90_P10096	-1.95807	-2.03315	0.321553	0.131274	19.6349	10	6	Glyceraldehyde-3-phosphate dehydrogenase
UniRef90_P84098	-2.05932	-2.07724	0.980096	0.565859	19.1571	5	3	60S ribosomal protein L19
UniRef90_P62277	-2.39164	-2.08406	0.606994	0.350448	19.084	7	3	40S ribosomal protein S13
UniRef90_Q61595	-2.09487	-2.09487	0.159835	0.11302	18.9685	2	2	Kinectin
UniRef90_P06745	-1.71609	-2.10885	1.34169	0.42428	18.8201	13	10	Glucose-6-phosphate isomerase
UniRef90_P22392	-2.13659	-2.13422	0.204217	0.117905	18.5529	3	3	Nucleoside diphosphate kinase B
UniRef90_P27361	-2.38177	-2.13422	0.559574	0.250249	18.5529	8	5	Mitogen-activated protein kinase 3
UniRef90_P23396	-2.13686	-2.13686	1.21043	0.855906	18.5252	5	2	40S ribosomal protein S3
UniRef90_Q9P0L0	-1.79737	-2.14268	0.858788	0.271572	18.4645	10	10	Vesicle-associated membrane protein-associated protein A
UniRef90_Q6NWC3	-2.32912	-2.16993	0.573054	0.256278	18.1818	6	5	Ribosomal protein S2
UniRef90_P62913	-2.58217	-2.17313	0.916784	0.529305	18.1488	4	3	60S ribosomal protein L11
UniRef90_P07237	-1.30929	-2.17597	2.01245	0.580944	18.1196	16	12	Protein disulfide-isomerase
UniRef90_Q8BH95	-2.17805	-2.17805	4.28152	3.02749	18.0981	6	2	Enoyl-CoA hydratase, mitochondrial
UniRef90_P06733	-2.18452	-2.18452	0.938293	0.663473	18.0318	5	2	Alpha-enolase
UniRef90_Q9NZR1	-2.22415	-2.22497	0.0781572	0.0390786	17.6212	5	4	Tropomodulin-2
UniRef90_O08795	-2.09573	-2.24373	0.809963	0.330666	17.4332	8	6	Glucosidase 2 subunit beta
UniRef90_Q06830	-2.25687	-2.25096	0.384072	0.221744	17.3611	4	3	Peroxiredoxin-1
UniRef90_P10809	-2.17617	-2.26001	0.962555	0.196481	17.2713	31	24	60 kDa heat shock protein, mitochondrial
UniRef90_Q9UPY8	-2.24313	-2.26003	0.271603	0.15681	17.2712	4	3	Microtubule-associated protein RP/EB family member 3
UniRef90_P09525	-1.69682	-2.26903	1.1858	0.684622	17.1821	10	3	Annexin A4
UniRef90_Q9Y3I0	-2.28941	-2.28941	0.309741	0.21902	16.9821	2	2	UPF0027 protein C22orf28
UniRef90_Q6NUK1	-1.87482	-2.33887	1.00805	0.504025	16.5042	7	4	Calcium-binding mitochondrial carrier protein SCaMC-1
UniRef90_Q60870	-2.34355	-2.34355	1.05924	0.748999	16.4596	2	2	Receptor expression-enhancing protein 5
UniRef90_P24268	-2.26654	-2.37016	0.868874	0.501645	16.2075	4	3	Cathepsin D 30 kDa heavy chain
UniRef90_P06576	-2.38197	-2.38197	2.05906	1.45597	16.0966	12	2	ATP synthase subunit beta, mitochondrial
UniRef90_P08708	-2.39523	-2.39523	0.0833626	0.0589463	15.9729	3	2	40S ribosomal protein S17
UniRef90_Q9NTK5	-2.26262	-2.40265	0.861512	0.430756	15.9039	5	4	Obg-like ATPase 1
UniRef90_Q14CZ8	-1.95921	-2.43829	2.18793	1.2632	15.5763	6	3	Hepatocyte cell adhesion molecule
UniRef90_Q5RBL9	-2.5549	-2.48543	0.427185	0.246635	15.1515	7	3	Reticulon-3
UniRef90_P19783	-2.58716	-2.49057	0.33852	0.195445	15.1057	4	3	Cytochrome c oxidase subunit 4 isoform 1, mitochondrial
UniRef90_P26373	-2.4218	-2.49057	0.16012	0.0924454	15.1057	10	3	60S ribosomal protein L13
UniRef90_Q9DAU1	-2.54399	-2.54399	0.574853	0.406482	14.637	2	2	Protein canopy homolog 3
UniRef90_O54755	-2.08613	-2.55107	1.25072	0.62536	14.5758	6	4	MIPP65
UniRef90_P10252	-2.58023	-2.58023	0.440093	0.311193	14.326	3	2	CD48 antigen
UniRef90_Q9Z2I0	-2.59693	-2.58736	0.480918	0.215073	14.2653	9	5	LETM1 and EF-hand domain-containing protein 1, mitochondrial
UniRef90_P27824	-2.08939	-2.61117	1.31904	0.365836	14.0647	15	13	Calnexin
UniRef90_Q13418	-2.61276	-2.61276	0.524558	0.370919	14.0514	5	2	Integrin-linked protein kinase
UniRef90_Q99J99	-2.61863	-2.61863	2.69398	1.90493	14.0023	2	2	3-mercaptopyruvate sulfurtransferase
UniRef90_P16884	-2.95994	-2.63227	1.61288	0.931197	13.8889	3	3	Neurofilament heavy polypeptide
UniRef90_P48758	-2.87522	-2.64847	0.650524	0.290923	13.7552	7	5	Carbonyl reductase [NADPH] 1
UniRef90_P41219	-2.75312	-2.65668	1.48657	0.525582	13.6877	26	8	Peripherin
UniRef90_Q9Z0F7	-2.65994	-2.65994	0.243157	0.171938	13.6611	3	2	Gamma-synuclein
UniRef90_Q14847	-2.54708	-2.66903	0.215152	0.124218	13.587	7	3	LIM and SH3 domain protein 1
UniRef90_P62424	-2.68108	-2.67356	0.35435	0.204584	13.5501	7	3	60S ribosomal protein L7a
UniRef90_P07196	-2.67944	-2.6835	0.44158	0.156122	13.4696	24	8	Neurofilament light polypeptide
UniRef90_P14415	-2.27163	-2.68482	2.6655	1.19205	13.459	5	5	Sodium/potassium-transporting ATPase subunit beta-2
UniRef90_P07942	-2.76838	-2.70487	0.879658	0.507871	13.2979	9	3	Laminin subunit beta-1
UniRef90_P25189	-2.66931	-2.72464	0.859354	0.303828	13.1407	15	8	Myelin protein P0
UniRef90_P39019	-2.73728	-2.73728	1.05804	0.748144	13.041	5	2	40S ribosomal protein S19
UniRef90_Q64727	-2.19269	-2.74631	1.33905	0.257701	12.9702	60	27	Vinculin
UniRef90_P58802	-2.75191	-2.75191	1.19504	0.845022	12.9264	5	2	TBC1 domain family member 10A
UniRef90_Q04447	-2.75978	-2.76123	0.66145	0.330725	12.8539	10	4	Creatine kinase B-type
UniRef90_P30050	-2.4205	-2.78241	0.865344	0.499607	12.6904	4	3	60S ribosomal protein L12
UniRef90_P51572	-2.86751	-2.83188	0.0670574	0.0387156	12.3153	4	3	B-cell receptor-associated protein 31
UniRef90_Q16762	-2.83281	-2.83281	2.26295	1.60015	12.3083	9	2	Thiosulfate sulfurtransferase
UniRef90_Q9QY76	-2.79335	-2.854	0.916543	0.529167	12.1507	3	3	Vesicle-associated membrane protein-associated protein B
UniRef90_Q4G079	-2.53738	-2.86581	0.727429	0.363714	12.0635	5	4	Small inducible cytokine subfamily E, member 1
UniRef90_P09417	-2.872	-2.872	1.12396	0.794757	12.0181	2	2	Dihydropteridine reductase
UniRef90_O75323	-2.89068	-2.89068	0.804336	0.568752	11.8818	3	2	Protein NipSnap homolog 2
UniRef90_P31937	-2.70572	-2.93444	1.55715	0.778574	11.5679	10	4	3-hydroxyisobutyrate dehydrogenase, mitochondrial
UniRef90_P38117	-2.94281	-2.94281	2.01067	1.42176	11.5087	5	2	Electron transfer flavoprotein subunit beta
UniRef90_Q07020	-2.83274	-2.94474	1.31137	0.655684	11.4951	7	4	60S ribosomal protein L18
UniRef90_P49755	-2.96008	-2.96008	1.15404	0.816029	11.3874	2	2	Transmembrane emp24 domain-containing protein 10
UniRef90_Q71U36	-2.98139	-2.98139	0.366174	0.258924	11.2392	2	2	Tubulin alpha-1A chain
UniRef90_Q96A33	-2.98356	-2.98356	0.105715	0.0747518	11.2241	5	2	Coiled-coil domain-containing protein 47
UniRef90_P21796	-2.99786	-3.00263	0.426306	0.174039	11.0931	7	6	Voltage-dependent anion-selective channel protein 1
UniRef90_P70441	-3.00567	-3.00567	1.0291	0.727685	11.0724	7	2	Na(+)/H(+) exchange regulatory cofactor NHE-RF1
UniRef90_P50213	-2.65203	-3.02154	1.21216	0.49486	10.9645	11	6	Isocitrate dehydrogenase [NAD] subunit alpha, mitochondrial
UniRef90_P21912	-2.90816	-3.02522	0.650843	0.325422	10.9396	7	4	Succinate dehydrogenase [ubiquinone] iron-sulfur subunit, mitochondrial
UniRef90_Q9DC70	-2.93146	-3.04942	1.06165	0.530823	10.7773	4	4	NADH dehydrogenase [ubiquinone] iron-sulfur protein 7, mitochondrial
UniRef90_Q9WV54	-3.06526	-3.06526	0.801871	0.567009	10.6721	3	2	Acid ceramidase subunit beta
UniRef90_P35232	-3.13086	-3.07553	0.109521	0.0632317	10.6045	5	3	Prohibitin
UniRef90_P11047	-0.290454	-3.08066	5.06826	2.92616	10.5708	17	3	Laminin subunit gamma-1
UniRef90_P08003	-3.08255	-3.08255	0.995666	0.704042	10.5584	4	2	Protein disulfide-isomerase A4
UniRef90_O08553	-3.08572	-3.08572	0.280295	0.198198	10.5377	8	2	Dihydropyrimidinase-related protein 2
UniRef90_Q96HE7	-1.76915	-3.08916	2.56561	1.48125	10.5152	9	3	ERO1-like protein alpha
UniRef90_P30101	-2.68116	-3.11353	1.38818	0.262342	10.3573	51	28	Protein disulfide-isomerase A3
UniRef90_O75874	-3.49111	-3.12598	1.17788	0.526762	10.2775	7	5	Isocitrate dehydrogenase [NADP] cytoplasmic
UniRef90_O60763	-3.22892	-3.13914	0.28893	0.129213	10.1937	8	5	General vesicular transport factor p115
UniRef90_P18124	-3.16105	-3.16105	0.327056	0.231263	10.0555	6	2	60S ribosomal protein L7
UniRef90_O95865	-3.17797	-3.18269	0.243962	0.140852	9.92063	4	3	N(G),N(G)-dimethylarginine dimethylaminohydrolase 2
UniRef90_Q13596	-3.18946	-3.18946	1.66185	1.17511	9.87877	7	2	Sorting nexin-1
UniRef90_P14625	-2.78492	-3.19535	1.242	0.469431	9.84252	18	7	Endoplasmin
UniRef90_P46459	-3.22062	-3.22062	0.392633	0.277634	9.68818	2	2	Vesicle-fusing ATPase
UniRef90_P24270	-3.44106	-3.22539	0.721159	0.294412	9.65927	18	6	Catalase
UniRef90_Q9DB73	-3.24749	-3.24749	0.20482	0.14483	9.52644	3	2	NADH-cytochrome b5 reductase 1
UniRef90_P13804	-3.07951	-3.28233	0.530163	0.187441	9.32033	8	8	Electron transfer flavoprotein subunit alpha, mitochondrial
UniRef90_P07954	-3.80981	-3.30012	1.57069	0.702436	9.21659	9	5	Fumarate hydratase, mitochondrial
UniRef90_P62269	-3.17191	-3.31686	1.02248	0.417424	9.11998	13	6	40S ribosomal protein S18
UniRef90_P11021	-2.89606	-3.3173	1.40163	0.404615	9.11748	21	12	78 kDa glucose-regulated protein
UniRef90_P68371	-3.34339	-3.34339	0.0100507	0.00710693	8.96871	3	2	Tubulin beta-2C chain
UniRef90_Q96I99	-3.09966	-3.36457	0.976608	0.563845	8.84956	7	3	Succinyl-CoA ligase [GDP-forming] subunit beta, mitochondrial
UniRef90_P04904	-3.46902	-3.40599	0.280923	0.162191	8.62069	6	3	Glutathione S-transferase alpha-3
UniRef90_P53007	-3.44406	-3.44406	0.249644	0.176525	8.41508	3	2	Tricarboxylate transport protein, mitochondrial
UniRef90_Q91VG6	-2.40692	-3.45943	2.39546	1.38302	8.33333	5	3	Chchd3 protein (Fragment)
UniRef90_O75396	-3.47992	-3.47992	0.373694	0.264241	8.22549	3	2	Vesicle-trafficking protein SEC22b
UniRef90_P56571	-3.5728	-3.49786	0.90148	0.45074	8.13213	5	4	ES1 protein homolog, mitochondrial
UniRef90_Q5XIC0	-3.6179	-3.6179	0.615479	0.43521	7.53175	3	2	Peroxisomal 3,2-trans-enoyl-CoA isomerase
UniRef90_P27797	-3.43226	-3.67055	1.09558	0.346452	7.28151	18	10	Calreticulin
UniRef90_P00505	-3.72753	-3.6893	0.954367	0.551004	7.19424	7	3	Aspartate aminotransferase, mitochondrial
UniRef90_Q15084	-3.46737	-3.70044	0.395267	0.176769	7.14286	9	5	Protein disulfide-isomerase A6
UniRef90_Q8CAY6	-3.75147	-3.70044	0.346855	0.200257	7.14286	6	3	Acetyl-CoA acetyltransferase, cytosolic
UniRef90_Q9Y4L1	-2.30664	-3.73335	2.52646	1.45865	6.99301	8	3	Hypoxia up-regulated protein 1
UniRef90_O75390	-3.77031	-3.81762	0.10007	0.0577757	6.62252	9	3	Citrate synthase, mitochondrial
UniRef90_Q3KR86	-3.73641	-3.8679	0.464515	0.268188	6.41026	5	3	Inner membrane protein, mitochondrial
UniRef90_Q5MJP6	-3.95815	-3.95815	0.544839	0.385259	6.04503	4	2	Poly(RC) binding protein 3
UniRef90_O35409	-4.02894	-4.0436	0.244696	0.122348	5.71726	10	4	Glutamate carboxypeptidase 2
UniRef90_Q8BMK4	-4.08255	-4.08255	0.168404	0.11908	5.57344	7	2	Cytoskeleton-associated protein 4
UniRef90_Q9DB20	-4.09124	-4.08323	0.287183	0.143592	5.57096	7	4	ATP synthase subunit O, mitochondrial
UniRef90_Q5QNW6	-4.85569	-4.09592	2.06379	0.922954	5.52486	7	5	Histone H2B type 2-F
UniRef90_Q9BPW8	-4.17906	-4.17906	0.29185	0.206369	5.23167	2	2	Protein NipSnap homolog 1
UniRef90_P48735	-4.23176	-4.23176	1.2867	0.909834	5.05349	10	2	Isocitrate dehydrogenase [NADP], mitochondrial
UniRef90_P10649	-4.30663	-4.26303	0.117431	0.0677987	4.9505	12	3	Glutathione S-transferase Mu 1
UniRef90_P62906	-3.45395	-4.27798	1.52736	0.881824	4.90196	11	3	60S ribosomal protein L10a
UniRef90_Q9DB77	-4.32001	-4.32001	0.178533	0.126242	4.76793	9	2	Cytochrome b-c1 complex subunit 2, mitochondrial
UniRef90_Q9CQQ7	-4.33685	-4.33685	0.425996	0.301225	4.71522	4	2	ATP synthase subunit b, mitochondrial
UniRef90_Q9JKC6	-4.38044	-4.38044	2.4171	1.70914	4.58132	2	2	Cell cycle exit and neuronal differentiation protein 1
UniRef90_O43175	-4.38323	-4.38323	0.180638	0.127731	4.57286	7	2	D-3-phosphoglycerate dehydrogenase
UniRef90_P13086	-4.57887	-4.54495	0.271582	0.135791	4.10787	8	4	Succinyl-CoA ligase [GDP-forming] subunit alpha, mitochondrial
UniRef90_Q96CX2	-4.68676	-4.68676	2.96221	2.0946	3.73767	6	2	BTB/POZ domain-containing protein KCTD12
UniRef90_Q16836	-3.86936	-4.94826	2.15218	0.878625	3.13749	8	6	Hydroxyacyl-coenzyme A dehydrogenase, mitochondrial
UniRef90_P24473	-4.85799	-4.96809	0.271781	0.156913	3.09598	6	3	Glutathione S-transferase kappa 1
UniRef90_Q8BWT1	-5.2999	-4.98641	1.1016	0.492649	3.0581	11	5	3-ketoacyl-CoA thiolase, mitochondrial
UniRef90_Q00577	-4.23955	-5.51728	2.93418	1.10902	2.13675	12	7	Transcriptional activator protein Pur-alpha
UniRef90_P02768	-5.68095	-5.53605	2.19413	0.829305	2.1097	14	7	Serum albumin
UniRef90_Q02252	-4.92923	-5.72739	2.22217	0.907197	1.85253	12	6	Methylmalonate-semialdehyde dehydrogenase [acylating], mitochondrial

## Sheet: injury 24h
UniRef90	Mean	Median	Std Dev	Std Err	Incorporation (%)	N (all peptides)	N (quanti peptides)	Cluster Name
UniRef90_P70232	4.39291	4.39291	0.835835	0.591024	95.4563	2	2	Processed neural cell adhesion molecule L1-like protein
UniRef90_Q93045	4.09615	4.09615	1.66136	1.17476	94.4759	2	2	Stathmin-2
UniRef90_Q794F9	3.92919	3.92919	0.180035	0.127304	93.8399	3	2	4F2 cell-surface antigen heavy chain
UniRef90_B5DF73	3.58681	3.58681	0.228734	0.161739	92.3168	4	2	Gbp5 protein (Fragment)
UniRef90_Q5FVS1	3.33127	3.35993	0.551379	0.318339	91.1245	7	3	Ferritin (Fragment)
UniRef90_Q63663	3.49505	3.30757	0.587664	0.262811	90.8265	8	5	Interferon-induced guanylate-binding protein 2
UniRef90_P08226	3.01146	3.14561	0.470251	0.15675	89.8473	24	9	Apolipoprotein E
UniRef90_P06837	3.02829	3.02829	0.543677	0.384437	89.0811	3	2	Neuromodulin
UniRef90_P21263	2.6659	2.63498	0.583637	0.168482	86.1336	31	12	Nestin
UniRef90_Q00238	2.35318	2.35318	0.311532	0.220286	83.632	3	2	Intercellular adhesion molecule 1
UniRef90_P18589	1.69604	2.23107	0.968754	0.559311	82.4402	8	3	Interferon-induced GTP-binding protein Mx2
UniRef90_P14873	1.98271	2.07709	0.506049	0.178915	80.8413	14	8	MAP1 light chain LC1
UniRef90_Q12860	1.96157	1.96157	0.964898	0.682286	79.5704	4	2	Contactin-1
UniRef90_P10960	1.56493	1.56493	0.0120728	0.00853676	74.7387	4	2	Sulfated glycoprotein 1
UniRef90_Q63560	1.32567	1.54557	0.765698	0.382849	74.4845	8	4	Microtubule-associated protein 6
UniRef90_P14901	1.5351	1.5351	1.96052	1.38629	74.3463	7	2	Heme oxygenase 1
UniRef90_O43396	1.39513	1.39513	2.64488	1.87021	72.4527	2	2	Thioredoxin-like protein 1
UniRef90_Q62523	1.38153	1.38153	0.241307	0.17063	72.2641	2	2	Zyxin
UniRef90_P12268	1.0114	1.0114	0.894428	0.632456	66.842	2	2	Inosine-5&apos;-monophosphate dehydrogenase 2
UniRef90_Q9Y696	0.960403	1	0.0710996	0.0410494	66.6667	6	3	Chloride intracellular channel protein 4
UniRef90_P08699	0.833936	0.833936	0.00727375	0.00514332	64.0616	4	2	Galectin-3
UniRef90_Q8R2Y2	1.17641	0.810966	0.704462	0.406721	63.6943	7	3	Cell surface glycoprotein MUC18
UniRef90_Q99P72	0.611047	0.810966	0.500304	0.138759	63.6943	19	13	Reticulon-4
UniRef90_O08532-5	0.606479	0.739372	0.245012	0.141458	62.5391	4	3	Isoform 2E of Voltage-dependent calcium channel subunit alpha-2/delta-1
UniRef90_Q9QYR6	0.744075	0.734563	0.654787	0.197426	62.461	21	11	MAP1 light chain LC2
UniRef90_P13596	0.572983	0.696658	1.11329	0.497879	61.8429	6	5	Neural cell adhesion molecule 1
UniRef90_P10605	0.340025	0.630394	1.43042	0.639702	60.7533	10	5	Cathepsin B heavy chain
UniRef90_Q8WUM4	-0.133969	0.548996	1.95451	0.977254	59.4002	8	4	Programmed cell death 6-interacting protein
UniRef90_Q5QD51	0.181614	0.522841	0.876548	0.331304	58.9623	11	7	A-kinase anchor protein 12
UniRef90_P14415	0.518396	0.518396	2.44134	1.72629	58.8877	4	2	Sodium/potassium-transporting ATPase subunit beta-2
UniRef90_P62988	0.477123	0.432455	0.163404	0.0730766	57.4383	6	5	Ubiquitin
UniRef90_P07825	0.425827	0.425827	0.343712	0.243041	57.3259	2	2	Synaptophysin
UniRef90_P01830	0.414563	0.414563	0.941194	0.665525	57.1348	3	2	Thy-1 membrane glycoprotein
UniRef90_Q8VDN4	0.409646	0.409646	0.810549	0.573145	57.0513	3	2	Coiled-coil domain-containing protein 92
UniRef90_Q13492	0.356397	0.338971	0.137089	0.0559665	55.8471	13	6	Phosphatidylinositol-binding clathrin assembly protein
UniRef90_P35579	0.337422	0.337422	1.08948	0.770381	55.8206	3	2	Myosin-9
UniRef90_Q62465	0.322032	0.325539	0.326963	0.12358	55.6174	12	7	Synaptic vesicle membrane protein VAT-1 homolog
UniRef90_Q8R1F1	0.669191	0.311148	0.687627	0.397002	55.371	3	3	Niban-like protein 1
UniRef90_Q91VI7	-0.413838	0.307573	1.41051	0.814356	55.3097	3	3	Ribonuclease inhibitor
UniRef90_Q60780	0.261451	0.261451	0.349243	0.246952	54.5183	5	2	Growth arrest-specific protein 7
UniRef90_P35221	0.0598789	0.217607	0.658634	0.190131	53.7637	20	12	Catenin alpha-1
UniRef90_A7YY80	0.2005	0.202572	0.19079	0.110153	53.5045	5	3	Epb4.1l3 protein
UniRef90_Q14444	0.190366	0.180449	0.430458	0.215229	53.1229	5	4	Caprin-1
UniRef90_Q38PF9	0.12462	0.12462	0.513934	0.363406	52.1582	2	2	AHNAK 1 (Fragment)
UniRef90_Q5R1W9	0.113255	0.093879	0.164209	0.0620652	51.6262	11	7	L-lactate dehydrogenase A chain
UniRef90_P37802	0.0938322	0.0938322	0.114253	0.0807892	51.6254	10	2	Transgelin-2
UniRef90_P62910	0.0907138	0.0907138	3.57279	2.52634	51.5714	2	2	60S ribosomal protein L32
UniRef90_P13639	0.0824503	0.0824503	1.06275	0.751477	51.4284	4	2	Elongation factor 2
UniRef90_P31689	-0.0466381	0.0658621	0.342051	0.171025	51.1411	6	4	DnaJ homolog subfamily A member 1
UniRef90_Q865V6	0.0483266	0.0483266	0.299566	0.211825	50.8374	4	2	Macrophage-capping protein
UniRef90_Q9H444	0.0454019	-0.0143553	0.154589	0.0892523	49.7512	4	3	Charged multivesicular body protein 4b
UniRef90_P62191	-0.10379	-0.10379	0.666833	0.471522	48.2022	4	2	26S protease regulatory subunit 4
UniRef90_Q61490	-0.163751	-0.124328	0.131391	0.0758589	47.8469	4	3	CD166 antigen
UniRef90_P20340	-0.168027	-0.168027	0.29767	0.210484	47.0916	4	2	Ras-related protein Rab-6A
UniRef90_Q8VI36-2	-0.17389	-0.17389	0.225615	0.159534	46.9904	3	2	Isoform Alpha of Paxillin
UniRef90_P10107	-0.18223	-0.18223	0.662608	0.468534	46.8464	3	2	Annexin A1
UniRef90_Q6NZI2	-0.187656	-0.187656	0.331742	0.234577	46.7527	2	2	Polymerase I and transcript release factor
UniRef90_Q8VCH8	-0.195334	-0.195334	0.00890957	0.00630002	46.6203	4	2	UBX domain-containing protein 4
UniRef90_P05556	-0.205929	-0.238787	0.275315	0.0830106	45.8716	13	11	Integrin beta-1
UniRef90_Q12959	-0.41719	-0.238787	0.352968	0.203786	45.8716	6	3	Disks large homolog 1
UniRef90_P50461	-0.239201	-0.239201	0.18126	0.12817	45.8644	2	2	Cysteine and glycine-rich protein 3
UniRef90_Q9Y371	-0.506145	-0.286881	0.422113	0.243707	45.045	5	3	Endophilin-B1
UniRef90_P04075	-0.37165	-0.37165	0.0867049	0.0613096	43.5952	5	2	Fructose-bisphosphate aldolase A
UniRef90_P07355	-0.476013	-0.389567	0.391827	0.0799814	43.29	38	24	Annexin A2
UniRef90_Q92597	-0.410773	-0.410773	0.0613803	0.0434024	42.9295	7	2	Protein NDRG1
UniRef90_P33176	-0.378413	-0.411426	0.236405	0.105723	42.9185	11	5	Kinesin-1 heavy chain
UniRef90_P26038	-0.432381	-0.432381	1.00645	0.711665	42.563	6	2	Moesin
UniRef90_P62879	-0.457142	-0.443607	0.25006	0.144372	42.3729	5	3	Guanine nucleotide-binding protein G(I)/G(S)/G(T) subunit beta-2
UniRef90_P14618	-0.463303	-0.463303	0.0887637	0.0627654	42.0399	6	2	Pyruvate kinase isozymes M1/M2
UniRef90_P36543	-0.480033	-0.480033	0.0365681	0.0258575	41.7576	5	2	V-type proton ATPase subunit E 1
UniRef90_O00299	-0.894783	-0.495695	0.784946	0.453189	41.4938	7	3	Chloride intracellular channel protein 1
UniRef90_P23528	-0.427799	-0.505891	0.199996	0.0755912	41.3223	7	7	Cofilin-1
UniRef90_Q9UL25	-0.534782	-0.534782	0.18985	0.134244	40.8376	3	2	Ras-related protein Rab-21
UniRef90_P83731	-0.535607	-0.535607	0.717059	0.507038	40.8238	2	2	60S ribosomal protein L24
UniRef90_P04899	-0.550993	-0.550993	0.166925	0.118034	40.5664	11	2	Guanine nucleotide-binding protein G(i) subunit alpha-2
UniRef90_P27635	-0.563599	-0.563599	1.43078	1.01171	40.3559	3	2	60S ribosomal protein L10
UniRef90_P16330	-0.58971	-0.565597	0.23362	0.0953749	40.3226	9	6	2&apos;,3&apos;-cyclic-nucleotide 3&apos;-phosphodiesterase
UniRef90_P50454	-0.570712	-0.57502	1.98292	0.809524	40.1655	12	6	Serpin H1
UniRef90_Q8CBW3	-0.57502	-0.57502	0.041085	0.0290515	40.1655	2	2	Abl interactor 1
UniRef90_P21291	-0.57997	-0.57997	2.12711	1.50409	40.0831	3	2	Cysteine and glycine-rich protein 1
UniRef90_Q15417	-0.599064	-0.584963	0.07708	0.0256933	40	19	9	Calponin-3
UniRef90_Q15041	-0.613408	-0.613408	0.0266718	0.0188598	39.5277	2	2	ADP-ribosylation factor-like protein 6-interacting protein 1
UniRef90_P09671	-0.743345	-0.62293	0.374748	0.216361	39.3701	4	3	Superoxide dismutase [Mn], mitochondrial
UniRef90_P68104	-0.672169	-0.62293	0.347713	0.155502	39.3701	5	5	Elongation factor 1-alpha 1
UniRef90_Q62418	-0.625966	-0.625966	0.805228	0.569382	39.3199	5	2	Drebrin-like protein
UniRef90_P08238	-0.75654	-0.632268	0.445159	0.123465	39.2157	20	13	Heat shock protein HSP 90-beta
UniRef90_P37837	-0.521738	-0.632268	0.634141	0.283596	39.2157	8	5	Transaldolase
UniRef90_Q9UNZ2	-0.642434	-0.641546	0.275509	0.159065	39.0625	10	3	NSFL1 cofactor p47
UniRef90_P06748	-0.646538	-0.646538	0.15625	0.110485	38.9802	2	2	Nucleophosmin
UniRef90_P07737	-0.663269	-0.663269	0.0837177	0.0591974	38.7047	4	2	Profilin-1
UniRef90_P26645	-0.723154	-0.678072	0.347359	0.200548	38.4615	5	3	Myristoylated alanine-rich C-kinase substrate
UniRef90_P14550	-0.149823	-0.687061	1.00675	0.581248	38.3142	6	3	Alcohol dehydrogenase [NADP+]
UniRef90_P30153	-0.708828	-0.695004	0.136396	0.0681982	38.1841	8	4	Serine/threonine-protein phosphatase 2A 65 kDa regulatory subunit A alpha isoform
UniRef90_Q7TP42	-0.700433	-0.700433	0.0062778	0.00443908	38.0953	2	2	Ab2-292
UniRef90_P52565	-0.556876	-0.706309	0.513727	0.256864	37.9993	8	4	Rho GDP-dissociation inhibitor 1
UniRef90_Q13177	-0.669703	-0.722466	0.279901	0.125175	37.7358	9	5	PAK-2p34
UniRef90_Q9ESN0	-0.735918	-0.735516	0.213564	0.0570773	37.5236	29	14	Protein Niban
UniRef90_Q92598	-0.759469	-0.759469	0.102401	0.0724083	37.1351	4	2	Heat shock protein 105 kDa
UniRef90_Q01082	-0.565483	-0.76551	0.597843	0.15978	37.0374	46	14	Spectrin beta chain, brain 1
UniRef90_Q02750	-1.02901	-0.765535	1.19477	0.487762	37.037	6	6	Dual specificity mitogen-activated protein kinase kinase 1
UniRef90_O35685	-0.770845	-0.773996	0.0381835	0.0220453	36.9004	3	3	Nuclear migration protein nudC
UniRef90_P62834	-0.759298	-0.775007	0.667224	0.333612	36.8841	7	4	Ras-related protein Rap-1A
UniRef90_P54920	-0.839993	-0.799087	0.150965	0.0871597	36.4964	8	3	Alpha-soluble NSF attachment protein
UniRef90_Q9UDT6	-0.890436	-0.803174	0.342775	0.121189	36.4307	13	8	CAP-Gly domain-containing linker protein 2
UniRef90_Q15691	-0.782193	-0.831877	0.114944	0.066363	35.9712	5	3	Microtubule-associated protein RP/EB family member 1
UniRef90_Q9BW30	-0.899689	-0.887504	0.0735928	0.0367964	35.0881	5	4	Tubulin polymerization-promoting protein family member 3
UniRef90_P06733	-0.870647	-0.887525	0.0655713	0.0293244	35.0877	5	5	Alpha-enolase
UniRef90_P21333	-0.596	-0.890029	0.905502	0.36967	35.0482	13	6	Filamin-A
UniRef90_Q15907	-0.9985	-0.903018	0.35495	0.144908	34.8435	9	6	Ras-related protein Rab-11B
UniRef90_O00231	-0.903141	-0.903141	0.147155	0.104054	34.8416	4	2	26S proteasome non-ATPase regulatory subunit 11
UniRef90_Q15555	-1.14251	-0.910733	0.680894	0.304505	34.7222	5	5	Microtubule-associated protein RP/EB family member 2
UniRef90_Q80X08	-0.915614	-0.915614	0.791211	0.559471	34.6456	2	2	WASH complex subunit FAM21
UniRef90_P40240	-0.916749	-0.916749	0.0972297	0.0687518	34.6278	3	2	CD9 antigen
UniRef90_Q8K0T0	-0.933395	-0.933395	0.0320489	0.022662	34.367	4	2	Reticulon-1
UniRef90_Q9H115	-0.91976	-0.933395	0.0972689	0.0486345	34.367	6	4	Beta-soluble NSF attachment protein
UniRef90_Q60737	-0.942826	-0.942826	0.519743	0.367514	34.2197	2	2	Casein kinase II subunit alpha
UniRef90_Q8IYI6	-0.948272	-0.948272	1.26104	0.891688	34.1348	3	2	Exocyst complex component 8
UniRef90_P11233	0.14831	-0.948601	2.83171	1.63489	34.1297	3	3	Ras-related protein Ral-A
UniRef90_O94973	-0.948988	-0.948988	0.919705	0.65033	34.1237	2	2	AP-2 complex subunit alpha-2
UniRef90_P54578	-0.971324	-0.956057	0.172111	0.0993683	34.0136	10	3	Ubiquitin carboxyl-terminal hydrolase 14
UniRef90_O43707	-0.830005	-0.963455	0.357092	0.0798481	33.8986	33	20	Alpha-actinin-4
UniRef90_P61981	-1.05464	-0.978196	0.195709	0.0564962	33.67	15	12	14-3-3 protein gamma, N-terminally processed
UniRef90_P14602	-1.09953	-0.988365	0.257707	0.128854	33.5128	12	4	Heat shock protein beta-1
UniRef90_Q13765	-1.01169	-1.0043	0.568022	0.284011	33.2672	5	4	Nascent polypeptide-associated complex subunit alpha
UniRef90_Q04917	-1.10803	-1.02148	0.202235	0.11676	33.0033	4	3	14-3-3 protein eta
UniRef90_P09936	-1.10574	-1.0285	0.411582	0.145516	32.8958	12	8	Ubiquitin carboxyl-terminal hydrolase isozyme L1
UniRef90_Q15365	-1.04226	-1.04264	0.108494	0.0626391	32.6797	5	3	Poly(rC)-binding protein 1
UniRef90_P13796	-1.05251	-1.04963	0.205081	0.0775131	32.5733	14	7	Plastin-2
UniRef90_Q9H223	-1.16015	-1.04963	0.507309	0.191745	32.5733	9	7	EH domain-containing protein 4
UniRef90_P13674	-1.05918	-1.05918	0.451603	0.319332	32.4281	2	2	Prolyl 4-hydroxylase subunit alpha-1
UniRef90_P46459	-1.05955	-1.05955	0.0538328	0.0380655	32.4225	3	2	Vesicle-fusing ATPase
UniRef90_P09471	-1.06626	-1.06626	0.449429	0.317794	32.3207	3	2	Guanine nucleotide-binding protein G(o) subunit alpha
UniRef90_Q08209	-0.574112	-1.06718	1.89655	0.948274	32.3068	6	4	Serine/threonine-protein phosphatase 2B catalytic subunit alpha isoform
UniRef90_Q9UQ80	-1.06744	-1.06744	0.310338	0.219442	32.3028	4	2	Proliferation-associated protein 2G4
UniRef90_Q62736	-0.961405	-1.07039	0.316672	0.0817644	32.2581	21	15	Non-muscle caldesmon
UniRef90_P54577	-1.07054	-1.07054	2.09007	1.4779	32.2558	5	2	Tyrosyl-tRNA synthetase, cytoplasmic
UniRef90_Q14203	-1.10203	-1.09761	0.196781	0.0593317	31.8471	24	11	Dynactin subunit 1
UniRef90_P12235	-1.59617	-1.09906	1.44633	0.723163	31.8254	7	4	ADP/ATP translocase 1
UniRef90_P62333	-1.56225	-1.12433	0.98477	0.440403	31.4465	8	5	26S protease regulatory subunit S10B
UniRef90_Q5M7W5	-1.16133	-1.12433	0.331045	0.0998138	31.4465	21	11	Microtubule-associated protein 4
UniRef90_P09525	-1.12728	-1.12728	1.2393	0.87632	31.4024	7	2	Annexin A4
UniRef90_P10096	-1.29634	-1.1375	0.421085	0.116788	31.25	18	13	Glyceraldehyde-3-phosphate dehydrogenase
UniRef90_P24268	-1.76646	-1.14624	1.28302	0.641512	31.12	6	4	Cathepsin D 30 kDa heavy chain
UniRef90_P08670	-1.04746	-1.15055	0.430082	0.0785218	31.0561	80	30	Vimentin
UniRef90_P38646	-1.15112	-1.15998	0.120563	0.0322218	30.9162	22	14	Stress-70 protein, mitochondrial
UniRef90_P00558	-1.04416	-1.17632	0.352042	0.0853828	30.6748	23	17	Phosphoglycerate kinase 1
UniRef90_P50990	-1.13248	-1.2068	0.471933	0.136235	30.2275	18	12	T-complex protein 1 subunit theta
UniRef90_Q8NC51	-1.19183	-1.21412	0.3717	0.166229	30.1205	5	5	Plasminogen activator inhibitor 1 RNA-binding protein
UniRef90_Q9QZR6	-1.50628	-1.23266	1.07729	0.407179	29.8507	11	7	Septin-9
UniRef90_P31150	-1.51946	-1.24199	0.888648	0.362789	29.7155	11	6	Rab GDP dissociation inhibitor alpha
UniRef90_P63000	-1.24906	-1.24489	0.160327	0.0925649	29.6736	3	3	Ras-related C3 botulinum toxin substrate 1
UniRef90_Q9BTV4	-1.25076	-1.25076	0.0342936	0.0242493	29.5887	3	2	Transmembrane protein 43
UniRef90_Q9Y6G9	-1.24246	-1.26303	0.102802	0.0593527	29.4118	4	3	Cytoplasmic dynein 1 light intermediate chain 1
UniRef90_P09417	-1.26628	-1.26628	0.182122	0.12878	29.365	3	2	Dihydropteridine reductase
UniRef90_P60953	-1.25448	-1.26903	0.0472839	0.0272994	29.3255	4	3	Cell division control protein 42 homolog
UniRef90_Q9UPY8	-1.27028	-1.26903	0.0567916	0.0327886	29.3255	3	3	Microtubule-associated protein RP/EB family member 3
UniRef90_O54922	-1.28594	-1.28594	0.237928	0.16824	29.0833	2	2	Exocyst complex component 7
UniRef90_P45974	-1.29278	-1.29278	0	0	28.9855	5	2	Ubiquitin carboxyl-terminal hydrolase 5
UniRef90_O60884	-1.29608	-1.29608	0.633684	0.448082	28.9385	2	2	DnaJ homolog subfamily A member 2
UniRef90_P52943	-1.31386	-1.31386	0.114836	0.081201	28.6857	4	2	Cysteine-rich protein 2
UniRef90_P06745	-0.991696	-1.31462	1.51788	0.758941	28.6749	8	4	Glucose-6-phosphate isomerase
UniRef90_P49368	-1.36794	-1.32458	0.199824	0.0576843	28.534	28	12	T-complex protein 1 subunit gamma
UniRef90_P54714	-1.34274	-1.33626	0.0258849	0.0105675	28.3692	9	6	Triosephosphate isomerase
UniRef90_P10637	-1.28584	-1.33914	0.195891	0.0876049	28.3286	9	5	Microtubule-associated protein tau
UniRef90_P51665	-1.87368	-1.36737	1.17078	0.523588	27.933	6	5	26S proteasome non-ATPase regulatory subunit 7
UniRef90_P25789	-1.3675	-1.3675	0.252391	0.178467	27.9311	2	2	Proteasome subunit alpha type-4
UniRef90_P18669	-1.58908	-1.38446	0.783816	0.319992	27.6951	9	6	Phosphoglycerate mutase 1
UniRef90_Q62417	-1.39223	-1.38957	0.0659124	0.0380546	27.6243	5	3	Sorbin and SH3 domain-containing protein 1
UniRef90_P08553	-1.41518	-1.39356	0.301461	0.106583	27.569	9	8	Neurofilament medium polypeptide
UniRef90_P09382	-1.41442	-1.41442	0.555698	0.392938	27.2813	4	2	Galectin-1
UniRef90_P16638	-1.53584	-1.41948	0.37751	0.188755	27.2117	11	4	ATP-citrate synthase
UniRef90_Q9UNM6	-1.64696	-1.42026	0.620307	0.310154	27.201	6	4	26S proteasome non-ATPase regulatory subunit 13
UniRef90_Q8CI51	-1.19898	-1.42761	1.18597	0.684723	27.1003	3	3	PDZ and LIM domain protein 5
UniRef90_P40227	-0.504457	-1.43296	1.72866	0.998044	27.027	5	3	T-complex protein 1 subunit zeta
UniRef90_P47755	-1.55195	-1.43296	0.225008	0.129908	27.027	7	3	F-actin-capping protein subunit alpha-2
UniRef90_Q29099	-1.4665	-1.43296	0.210279	0.121405	27.027	7	3	Polypyrimidine tract-binding protein 1
UniRef90_P35611	-1.44953	-1.44953	0.205087	0.145019	26.8011	4	2	Alpha-adducin
UniRef90_P46940	-1.46148	-1.46148	1.13357	0.801555	26.6389	5	2	Ras GTPase-activating-like protein IQGAP1
UniRef90_P27361	-1.50824	-1.46989	0.0664395	0.0383588	26.5252	7	3	Mitogen-activated protein kinase 3
UniRef90_Q925I1	-1.47125	-1.47125	1.49881	1.05982	26.5068	4	2	ATPase family AAA domain-containing protein 3
UniRef90_P25786	-1.03518	-1.48543	0.82408	0.475783	26.3158	6	3	Proteasome subunit alpha type-1
UniRef90_Q7L099	-0.591281	-1.48543	1.84945	1.06778	26.3158	6	3	Protein RUFY3
UniRef90_P49006	-0.903921	-1.5008	1.12023	0.646764	26.1097	3	3	MARCKS-related protein
UniRef90_P49720	-1.46738	-1.51095	0.159275	0.0796375	25.9741	4	4	Proteasome subunit beta type-3
UniRef90_Q920E5	-1.49687	-1.51096	0.0478062	0.0276009	25.974	4	3	Geranyltranstransferase
UniRef90_P62847	-1.79643	-1.53605	0.72968	0.421281	25.641	4	3	40S ribosomal protein S24
UniRef90_P61978	-1.65168	-1.53792	0.490007	0.200045	25.6164	12	6	Heterogeneous nuclear ribonucleoprotein K
UniRef90_P08133	-1.4201	-1.54102	0.803564	0.18435	25.5754	28	19	Annexin A6
UniRef90_Q01518	-1.39829	-1.56299	0.6032	0.190749	25.2866	14	10	Adenylyl cyclase-associated protein 1
UniRef90_P55072	-1.47884	-1.56778	0.600091	0.212164	25.2239	17	8	Transitional endoplasmic reticulum ATPase
UniRef90_P11940	-1.59998	-1.59138	0.506623	0.206828	24.9167	15	6	Polyadenylate-binding protein 1
UniRef90_P31948	-1.50023	-1.59932	0.43704	0.165186	24.8139	11	7	Stress-induced-phosphoprotein 1
UniRef90_P82979	-1.61047	-1.61047	0.335907	0.237522	24.6699	2	2	SAP domain-containing ribonucleoprotein
UniRef90_Q8WW12	-1.65496	-1.61353	0.245351	0.141653	24.6305	3	3	PEST proteolytic signal-containing nuclear protein
UniRef90_Q15019	-1.68589	-1.61579	0.158589	0.0792947	24.6015	11	4	Septin-2
UniRef90_P62937	-1.675	-1.62994	0.241174	0.0984587	24.42	16	6	Peptidyl-prolyl cis-trans isomerase A
UniRef90_P22392	-1.44937	-1.63631	0.425298	0.212649	24.3386	6	4	Nucleoside diphosphate kinase B
UniRef90_P62258	-1.67166	-1.64155	0.0919513	0.0347543	24.2718	15	7	14-3-3 protein epsilon
UniRef90_P22314	-1.59224	-1.65535	0.162057	0.0724743	24.0964	11	5	Ubiquitin-like modifier-activating enzyme 1
UniRef90_P31939	-1.68431	-1.68431	0.0539546	0.0381517	23.7311	6	2	IMP cyclohydrolase
UniRef90_P70296	-1.69846	-1.69846	0.42133	0.297925	23.5541	2	2	Hippocampal cholinergic neurostimulating peptide
UniRef90_Q99733	-1.70129	-1.70129	1.57873	1.11633	23.5188	2	2	Nucleosome assembly protein 1-like 4
UniRef90_Q6NUK1	-1.81857	-1.71243	0.958459	0.47923	23.3802	7	4	Calcium-binding mitochondrial carrier protein SCaMC-1
UniRef90_P11142	-1.63053	-1.7137	0.647818	0.116352	23.3645	39	31	Heat shock cognate 71 kDa protein
UniRef90_Q9UN36	-1.72504	-1.72504	0.246268	0.174137	23.224	4	2	Protein NDRG2
UniRef90_B7Z4T9	-1.59962	-1.73598	0.486409	0.198576	23.089	8	6	cDNA FLJ54074, highly similar to T-complex protein 1 subunit eta
UniRef90_P28838	-1.90546	-1.73868	0.636918	0.260021	23.0559	10	6	Cytosol aminopeptidase
UniRef90_P50991	-1.78777	-1.74416	0.0831233	0.0479912	22.9885	6	3	T-complex protein 1 subunit delta
UniRef90_Q9Y3I0	-1.46934	-1.76129	0.635941	0.36716	22.779	4	3	UPF0027 protein C22orf28
UniRef90_P13471	-1.76223	-1.76223	0.639072	0.451892	22.7675	6	2	40S ribosomal protein S14
UniRef90_Q14204	-1.65464	-1.76977	0.372162	0.0960919	22.6757	32	15	Cytoplasmic dynein 1 heavy chain 1
UniRef90_Q60870	-0.911302	-1.79077	1.83774	1.06102	22.4215	4	3	Receptor expression-enhancing protein 5
UniRef90_P16884	-1.72868	-1.81958	0.414043	0.146386	22.0762	10	8	Neurofilament heavy polypeptide
UniRef90_P84098	-1.83328	-1.83328	3.22359	2.27942	21.9132	4	2	60S ribosomal protein L19
UniRef90_Q8VBT0	-1.00543	-1.83592	1.93011	1.11435	21.8818	3	3	Thioredoxin-related transmembrane protein 1
UniRef90_Q00610	-1.94597	-1.85164	0.548528	0.17346	21.6961	17	10	Clathrin heavy chain 1
UniRef90_Q15404	-1.64217	-1.8679	0.432018	0.249425	21.5054	5	3	Ras suppressor protein 1
UniRef90_Q99KB8	-1.87053	-1.87053	0.784023	0.554388	21.4745	3	2	Hydroxyacylglutathione hydrolase, mitochondrial
UniRef90_Q86VP6	-1.76787	-1.87578	0.895053	0.516759	21.4133	4	3	Cullin-associated NEDD8-dissociated protein 1
UniRef90_Q5XI32	-1.89877	-1.89877	0.65875	0.465807	21.1464	4	2	F-actin-capping protein subunit beta
UniRef90_O94826	-2.12557	-1.90172	0.575671	0.287835	21.1123	8	4	Mitochondrial import receptor subunit TOM70
UniRef90_Q9Z0F7	-1.9147	-1.91704	0.190418	0.095209	20.936	6	4	Gamma-synuclein
UniRef90_Q66JR7	-1.91707	-1.91707	0.47648	0.336922	20.9356	3	2	Pgm2 protein (Fragment)
UniRef90_P01946	-1.92505	-1.92505	0.585608	0.414088	20.8442	5	2	Hemoglobin subunit alpha-1/2
UniRef90_P26638	-1.89937	-1.93242	0.725882	0.362941	20.76	8	4	Seryl-tRNA synthetase, cytoplasmic
UniRef90_Q9HB71	-1.89561	-1.93357	0.288745	0.166707	20.7469	3	3	Calcyclin-binding protein
UniRef90_P08865	-1.78501	-1.93734	0.476504	0.27511	20.7039	13	3	40S ribosomal protein SA
UniRef90_Q6NWC3	-2.37832	-1.93734	0.78695	0.454346	20.7039	3	3	Ribosomal protein S2
UniRef90_P48758	-2.00403	-1.97085	0.0574669	0.0331786	20.3252	5	3	Carbonyl reductase [NADPH] 1
UniRef90_P30626	-1.94481	-1.9782	0.148547	0.0857637	20.2429	4	3	Sorcin
UniRef90_Q80UE5	-1.89945	-1.9782	0.951787	0.549515	20.2429	6	3	Protein 4.1G
UniRef90_P62917	-1.48498	-1.98365	1.10232	0.551161	20.182	5	4	60S ribosomal protein L8
UniRef90_Q8NHW5	-1.94738	-1.98885	0.923876	0.377171	20.124	7	6	60S acidic ribosomal protein P0-like
UniRef90_O88531	-2.00508	-2.00508	2.41324	1.70642	19.9438	4	2	Palmitoyl-protein thioesterase 1
UniRef90_P31399	-2.00575	-2.00575	0.735845	0.520321	19.9363	5	2	ATP synthase subunit d, mitochondrial
UniRef90_Q06830	-2.02027	-2.02027	0.165792	0.117233	19.7761	2	2	Peroxiredoxin-1
UniRef90_P50502	-2.039	-2.039	0.203215	0.143695	19.571	2	2	Hsc70-interacting protein
UniRef90_Q61595	-1.75973	-2.04189	0.817945	0.408973	19.5395	6	4	Kinectin
UniRef90_O75874	-1.57365	-2.04264	1.12109	0.501368	19.5313	7	5	Isocitrate dehydrogenase [NADP] cytoplasmic
UniRef90_P13020	-1.79466	-2.07724	0.588925	0.340016	19.1571	4	3	Gelsolin
UniRef90_P36578	-1.84046	-2.07724	0.944071	0.422201	19.1571	10	5	60S ribosomal protein L4
UniRef90_O08795	-1.98474	-2.08406	0.546819	0.315706	19.084	4	3	Glucosidase 2 subunit beta
UniRef90_P11730	-2.08477	-2.08477	0.537257	0.379898	19.0764	2	2	Calcium/calmodulin-dependent protein kinase type II subunit gamma
UniRef90_Q9CR57	-2.08641	-2.08641	1.72884	1.22247	19.0589	3	2	60S ribosomal protein L14
UniRef90_Q9UHB9	-2.09276	-2.09276	0.380437	0.269009	18.9911	2	2	Signal recognition particle 68 kDa protein
UniRef90_P25189	-2.20204	-2.09424	1.03604	0.391588	18.9753	14	7	Myelin protein P0
UniRef90_P31937	-2.09632	-2.09632	3.41482	2.41464	18.9532	5	2	3-hydroxyisobutyrate dehydrogenase, mitochondrial
UniRef90_Q9DCN2	-2.31374	-2.09761	0.38021	0.219514	18.9394	8	3	NADH-cytochrome b5 reductase 3 soluble form
UniRef90_P16435	-2.10526	-2.10526	0.504585	0.356796	18.8582	4	2	NADPH--cytochrome P450 reductase
UniRef90_P29419	-2.11056	-2.11056	3.57445	2.52752	18.802	3	2	ATP synthase subunit e, mitochondrial
UniRef90_Q05816	-2.11775	-2.11775	0.0963332	0.0681179	18.726	3	2	Fatty acid-binding protein, epidermal
UniRef90_P07196	-2.12262	-2.16509	0.376969	0.0888524	18.2318	31	18	Neurofilament light polypeptide
UniRef90_P46776	-2.1727	-2.1727	0.442265	0.312729	18.1532	2	2	60S ribosomal protein L27a
UniRef90_Q9NZR1	-1.89127	-2.17313	0.594836	0.343429	18.1488	4	3	Tropomodulin-2
UniRef90_Q16352	-2.1747	-2.1747	0.868306	0.613985	18.1326	5	2	Alpha-internexin
UniRef90_P46778	-2.1764	-2.1764	0.95544	0.675598	18.1151	4	2	60S ribosomal protein L21
UniRef90_P61247	-1.99208	-2.18587	0.517615	0.172538	18.018	15	9	40S ribosomal protein S3a
UniRef90_P62829	-2.23534	-2.1937	0.100439	0.0502195	17.9379	6	4	60S ribosomal protein L23
UniRef90_P24270	-2.42988	-2.19513	0.678071	0.239734	17.9234	16	8	Catalase
UniRef90_P32119	-2.38664	-2.20164	0.557256	0.278628	17.8571	5	4	Peroxiredoxin-2
UniRef90_P25705	-2.73254	-2.20789	1.24482	0.718699	17.7936	13	3	ATP synthase subunit alpha, mitochondrial
UniRef90_P10809	-2.57715	-2.26003	0.784512	0.20256	17.2712	22	15	60 kDa heat shock protein, mitochondrial
UniRef90_P07237	-2.38179	-2.27501	0.480688	0.277525	17.1233	4	3	Protein disulfide-isomerase
UniRef90_P41105	-1.61355	-2.28688	1.45614	0.840701	17.0068	5	3	60S ribosomal protein L28
UniRef90_Q6IRK8	-2.30041	-2.30041	0.272552	0.192724	16.8748	2	2	Spna2 protein
UniRef90_Q62188	-2.14498	-2.30743	0.610312	0.352364	16.8067	3	3	Dihydropyrimidinase-related protein 3
UniRef90_P62753	-2.31858	-2.31858	0.688308	0.486708	16.6989	2	2	40S ribosomal protein S6
UniRef90_Q9UNX3	-2.09157	-2.31904	1.14689	0.662157	16.6945	4	3	60S ribosomal protein L26-like 1
UniRef90_P62280	-2.34644	-2.32329	0.198887	0.0994434	16.6536	7	4	40S ribosomal protein S11
UniRef90_P26641	-2.32887	-2.32887	1.25195	0.885259	16.6	6	2	Elongation factor 1-gamma
UniRef90_P18124	-2.33873	-2.33873	0.671459	0.474793	16.5055	6	2	60S ribosomal protein L7
UniRef90_P62081	-2.58201	-2.37295	0.514674	0.297147	16.1812	3	3	40S ribosomal protein S7
UniRef90_O08553	-2.30165	-2.38392	0.542685	0.15666	16.0784	23	12	Dihydropyrimidinase-related protein 2
UniRef90_Q64727	-2.17531	-2.38392	0.575326	0.143831	16.0784	32	16	Vinculin
UniRef90_O70503	-1.92886	-2.39676	1.16354	0.581768	15.9587	4	4	Estradiol 17-beta-dehydrogenase 12
UniRef90_Q9P0L0	-2.41339	-2.40423	0.622865	0.311433	15.8893	5	4	Vesicle-associated membrane protein-associated protein A
UniRef90_P62913	-1.95679	-2.41684	1.13029	0.652571	15.7729	5	3	60S ribosomal protein L11
UniRef90_Q16181	-2.45348	-2.45348	0.0633136	0.0447695	15.4384	4	2	Septin-7
UniRef90_Q9Z2I0	-2.47047	-2.47047	0.891674	0.630509	15.2853	5	2	LETM1 and EF-hand domain-containing protein 1, mitochondrial
UniRef90_P62851	-2.47112	-2.47112	2.26171	1.59927	15.2795	4	2	40S ribosomal protein S25
UniRef90_P32969	-2.51568	-2.50589	0.0933482	0.0538946	14.9701	5	3	60S ribosomal protein L9
UniRef90_P40925	-2.53136	-2.53136	0.112877	0.0798158	14.7468	2	2	Malate dehydrogenase, cytoplasmic
UniRef90_O54755	-2.66176	-2.56803	0.216021	0.12472	14.43	5	3	MIPP65
UniRef90_Q9R1J0	-2.5769	-2.5769	0.360588	0.254975	14.3543	3	2	Sterol-4-alpha-carboxylate 3-dehydrogenase, decarboxylating
UniRef90_Q9H0U4	-2.58785	-2.58785	0.105157	0.0743574	14.2612	2	2	Ras-related protein Rab-1B
UniRef90_P19096	-2.56037	-2.5984	0.374982	0.153086	14.1721	18	6	Oleoyl-[acyl-carrier-protein] hydrolase
UniRef90_P08708	-2.53801	-2.6017	2.53445	1.46326	14.1443	5	3	40S ribosomal protein S17
UniRef90_Q6TXE9	-2.60844	-2.60844	1.98067	1.40055	14.0876	6	2	LRRGT00050
UniRef90_P39023	-2.61974	-2.61974	0.0696952	0.0492819	13.993	2	2	60S ribosomal protein L3
UniRef90_Q9Y4W6	-2.62558	-2.62558	0.978651	0.69201	13.9444	2	2	AFG3-like protein 2
UniRef90_P09429	-2.63211	-2.63211	0.0871882	0.0616514	13.8902	2	2	High mobility group protein B1
UniRef90_P23396	-2.95272	-2.63459	1.10753	0.391571	13.8696	11	8	40S ribosomal protein S3
UniRef90_P27824	-2.02648	-2.6445	1.40916	0.575289	13.7878	7	6	Calnexin
UniRef90_P49755	-2.65517	-2.65517	1.4466	1.0229	13.7001	3	2	Transmembrane emp24 domain-containing protein 10
UniRef90_P19137	-3.15303	-2.65731	4.0077	2.00385	13.6826	26	4	Laminin subunit alpha-1
UniRef90_Q9Z2I9	-2.69135	-2.69135	0.588794	0.41634	13.4063	3	2	Succinyl-CoA ligase [ADP-forming] subunit beta, mitochondrial
UniRef90_P60866	-2.69844	-2.71149	0.0932809	0.0538558	13.245	5	3	40S ribosomal protein S20
UniRef90_P11021	-2.72518	-2.72518	0.0570748	0.040358	13.1364	3	2	78 kDa glucose-regulated protein
UniRef90_P26373	-2.85372	-2.72784	0.501987	0.250994	13.1154	8	4	60S ribosomal protein L13
UniRef90_Q9BPU6	-2.7336	-2.7336	0.220435	0.155871	13.0699	2	2	Dihydropyrimidinase-related protein 5
UniRef90_Q9DC70	-2.81006	-2.74416	0.143366	0.0827727	12.987	3	3	NADH dehydrogenase [ubiquinone] iron-sulfur protein 7, mitochondrial
UniRef90_P62750	-2.7541	-2.7541	0.413014	0.292045	12.9094	3	2	60S ribosomal protein L23a
UniRef90_P30101	-2.64555	-2.75596	0.456599	0.0932028	12.8949	41	24	Protein disulfide-isomerase A3
UniRef90_P62897	-2.8023	-2.8023	0.716414	0.506581	12.5383	2	2	Cytochrome c, somatic
UniRef90_P28331	-2.61735	-2.81352	0.693716	0.231239	12.4533	13	9	NADH-ubiquinone oxidoreductase 75 kDa subunit, mitochondrial
UniRef90_P41219	-2.84534	-2.81558	0.486516	0.162172	12.4378	28	9	Peripherin
UniRef90_P51572	-2.93917	-2.81928	0.437299	0.218649	12.4099	4	4	B-cell receptor-associated protein 31
UniRef90_P42766	-2.84363	-2.84363	0.0454734	0.0321545	12.2276	2	2	60S ribosomal protein L35
UniRef90_Q8BMK4	-2.95646	-2.84398	0.78001	0.450339	12.2249	7	3	Cytoskeleton-associated protein 4
UniRef90_P21796	-2.52568	-2.84599	1.05588	0.399087	12.21	11	7	Voltage-dependent anion-selective channel protein 1
UniRef90_P23284	-2.8521	-2.8521	0.51856	0.366677	12.1647	3	2	Peptidyl-prolyl cis-trans isomerase B
UniRef90_P30050	-2.92529	-2.854	0.338993	0.195717	12.1507	4	3	60S ribosomal protein L12
UniRef90_Q15084	-2.85712	-2.85712	1.11261	0.786733	12.1276	7	2	Protein disulfide-isomerase A6
UniRef90_Q07020	-1.42807	-2.8679	3.49458	2.0176	12.0482	5	3	60S ribosomal protein L18
UniRef90_P84085	-2.87423	-2.87423	0.409087	0.289268	12.0017	2	2	ADP-ribosylation factor 5
UniRef90_P62424	-2.71202	-2.88645	0.668536	0.272928	11.9126	7	6	60S ribosomal protein L7a
UniRef90_Q16836	-3.43385	-2.89142	1.75795	0.664443	11.8765	9	7	Hydroxyacyl-coenzyme A dehydrogenase, mitochondrial
UniRef90_Q9DB73	-2.90333	-2.90111	0.1711	0.0987846	11.8064	6	3	NADH-cytochrome b5 reductase 1
UniRef90_Q9BWM7	-2.8765	-2.91648	1.19709	0.691143	11.6959	5	3	Sideroflexin-3
UniRef90_O95865	-3.01681	-2.95047	0.157774	0.091091	11.4548	7	3	N(G),N(G)-dimethylarginine dimethylaminohydrolase 2
UniRef90_Q8CAY6	-2.81066	-2.95594	1.01976	0.416314	11.4164	12	6	Acetyl-CoA acetyltransferase, cytosolic
UniRef90_P51174	-2.96992	-2.96992	0.00911426	0.00644476	11.3187	5	2	Long-chain specific acyl-CoA dehydrogenase, mitochondrial
UniRef90_Q8R127	-3.06584	-2.97269	0.317541	0.183332	11.2994	5	3	Probable saccharopine dehydrogenase
UniRef90_P62899	-2.77778	-2.99458	0.428757	0.247543	11.1483	4	3	60S ribosomal protein L31
UniRef90_Q62446	-3.02842	-3.02842	0.277956	0.196545	10.918	2	2	FK506-binding protein 3
UniRef90_P35232	-2.97963	-3.03034	0.0986715	0.056968	10.9051	6	3	Prohibitin
UniRef90_P62277	-3.11401	-3.04614	0.125221	0.0722965	10.7991	5	3	40S ribosomal protein S13
UniRef90_P51553	-3.02498	-3.06695	0.216304	0.124883	10.661	5	3	Isocitrate dehydrogenase [NAD] subunit gamma, mitochondrial
UniRef90_Q9DC69	-3.08138	-3.08138	1.06995	0.756566	10.5661	2	2	NADH dehydrogenase [ubiquinone] 1 alpha subcomplex subunit 9, mitochondrial
UniRef90_P50544	-3.01077	-3.08876	0.491492	0.245746	10.5178	8	4	Very long-chain specific acyl-CoA dehydrogenase, mitochondrial
UniRef90_P27797	-2.72948	-3.09928	0.999687	0.40812	10.4494	9	6	Calreticulin
UniRef90_P62249	-3.23984	-3.11603	0.476028	0.274835	10.3413	5	3	40S ribosomal protein S16
UniRef90_P19783	-3.13477	-3.13477	0.402725	0.28477	10.2215	3	2	Cytochrome c oxidase subunit 4 isoform 1, mitochondrial
UniRef90_Q4G079	-3.13306	-3.14241	0.394491	0.176422	10.1729	6	5	Small inducible cytokine subfamily E, member 1
UniRef90_P13804	-2.67303	-3.17632	1.1192	0.50052	9.96016	6	5	Electron transfer flavoprotein subunit alpha, mitochondrial
UniRef90_A7Y9J9	-3.24412	-3.24412	0.691881	0.489233	9.54657	4	2	Mucin 5AC, oligomeric mucus/gel-forming
UniRef90_P11532	-2.99651	-3.25701	0.443292	0.198246	9.4697	10	5	Dystrophin
UniRef90_P62269	-3.21459	-3.27276	0.385029	0.192514	9.37652	11	4	40S ribosomal protein S18
UniRef90_P53007	-2.90599	-3.27501	2.12728	0.951347	9.3633	6	5	Tricarboxylate transport protein, mitochondrial
UniRef90_Q5QNW6	-3.29196	-3.29196	0.161273	0.114037	9.26407	6	2	Histone H2B type 2-F
UniRef90_P02788	-3.29855	-3.29866	1.01078	0.452036	9.22509	18	5	Lactoferroxin-C
UniRef90_O75390	-2.7132	-3.37851	1.15042	0.514482	8.77193	10	5	Citrate synthase, mitochondrial
UniRef90_P50213	-3.20598	-3.39225	0.400307	0.200154	8.69601	10	4	Isocitrate dehydrogenase [NAD] subunit alpha, mitochondrial
UniRef90_Q9Y4L1	-3.16604	-3.39232	1.24066	0.716293	8.69565	5	3	Hypoxia up-regulated protein 1
UniRef90_P04904	-3.70226	-3.42221	0.932089	0.466044	8.53254	5	4	Glutathione S-transferase alpha-3
UniRef90_P08003	-2.63015	-3.43296	2.40978	1.39129	8.47458	5	3	Protein disulfide-isomerase A4
UniRef90_P08249	-2.87182	-3.44626	1.20774	0.364147	8.40336	17	11	Malate dehydrogenase, mitochondrial
UniRef90_Q9JKC6	-3.50896	-3.50896	0.107482	0.0760015	8.07481	2	2	Cell cycle exit and neuronal differentiation protein 1
UniRef90_Q5XIC0	-3.52612	-3.52612	1.23469	0.873056	7.98698	3	2	Peroxisomal 3,2-trans-enoyl-CoA isomerase
UniRef90_P39019	-3.52361	-3.56025	0.491204	0.200533	7.81483	8	6	40S ribosomal protein S19
UniRef90_P00505	-3.62402	-3.57269	0.422942	0.149533	7.75295	17	8	Aspartate aminotransferase, mitochondrial
UniRef90_P54136	-3.77145	-3.57289	0.482853	0.278775	7.75194	6	3	Arginyl-tRNA synthetase, cytoplasmic
UniRef90_Q3KR86	-3.66366	-3.66366	0.288828	0.204232	7.31379	4	2	Inner membrane protein, mitochondrial
UniRef90_P06576	-3.63759	-3.66676	0.102609	0.0592411	7.29927	20	3	ATP synthase subunit beta, mitochondrial
UniRef90_Q68FX0	-3.70093	-3.70093	0.91862	0.649563	7.14058	2	2	Isocitrate dehydrogenase [NAD] subunit beta, mitochondrial
UniRef90_Q9DB77	-2.88597	-3.73335	1.56494	0.699864	6.99301	9	5	Cytochrome b-c1 complex subunit 2, mitochondrial
UniRef90_P50993	-3.47061	-3.7386	1.24227	0.507154	6.96941	10	6	Sodium/potassium-transporting ATPase subunit alpha-2
UniRef90_Q13884	-3.7812	-3.7812	3.39791	2.40269	6.78037	5	2	Beta-1-syntrophin
UniRef90_Q96CX2	-3.79594	-3.79594	0.814042	0.575614	6.71605	12	2	BTB/POZ domain-containing protein KCTD12
UniRef90_P56571	-3.36044	-3.79701	1.09512	0.632266	6.71141	4	3	ES1 protein homolog, mitochondrial
UniRef90_O35295	-4.03421	-3.80735	0.401908	0.232042	6.66667	6	3	Transcriptional activator protein Pur-beta
UniRef90_Q91XD7	-3.8396	-3.8396	0.500875	0.354172	6.52894	5	2	Cysteine-rich with EGF-like domain protein 1
UniRef90_O35409	-3.93141	-3.93141	2.0268	1.43316	6.15115	6	2	Glutamate carboxypeptidase 2
UniRef90_P35435	-3.87294	-3.96347	0.189322	0.109305	6.0241	4	3	ATP synthase subunit gamma, mitochondrial
UniRef90_Q96I99	-3.8988	-4.01792	0.43287	0.193585	5.81395	8	5	Succinyl-CoA ligase [GDP-forming] subunit beta, mitochondrial
UniRef90_Q8CAQ8	-3.95843	-4.0268	0.189571	0.109449	5.78035	4	3	Mitochondrial inner membrane protein
UniRef90_Q9DB20	-3.21191	-4.0268	1.56161	0.698372	5.78035	7	5	ATP synthase subunit O, mitochondrial
UniRef90_P02088	-2.69537	-4.05099	3.00852	1.50426	5.68971	8	4	Hemoglobin subunit beta-1
UniRef90_P11047	-4.27707	-4.08746	1.43457	0.828249	5.55556	21	3	Laminin subunit gamma-1
UniRef90_Q9CQQ7	-4.16007	-4.12928	1.57162	0.907373	5.40541	7	3	ATP synthase subunit b, mitochondrial
UniRef90_P45880	-4.15015	-4.15015	0.958364	0.677666	5.33191	3	2	Voltage-dependent anion-selective channel protein 2
UniRef90_O43175	-4.33934	-4.27198	0.529917	0.216338	4.9214	16	6	D-3-phosphoglycerate dehydrogenase
UniRef90_Q8QZT1	-4.39359	-4.39359	0.111575	0.0788956	4.54162	3	2	Acetyl-CoA acetyltransferase, mitochondrial
UniRef90_Q99798	-4.27264	-4.40599	0.507779	0.293166	4.5045	13	3	Aconitate hydratase, mitochondrial
UniRef90_P13086	-3.72763	-4.40881	1.47441	0.737203	4.49611	7	4	Succinyl-CoA ligase [GDP-forming] subunit alpha, mitochondrial
UniRef90_P07942	-3.82133	-4.49185	1.2215	0.705233	4.25532	12	3	Laminin subunit beta-1
UniRef90_P62906	-3.21138	-4.53218	2.82829	1.41415	4.14287	9	4	60S ribosomal protein L10a
UniRef90_Q8BH95	-4.28995	-4.59096	1.09372	0.631458	3.98406	5	3	Enoyl-CoA hydratase, mitochondrial
UniRef90_Q16762	-4.61832	-4.61832	4.95063	3.50062	3.91216	6	2	Thiosulfate sulfurtransferase
UniRef90_P12532	-4.76704	-4.65206	0.308927	0.154463	3.82518	11	4	Creatine kinase U-type, mitochondrial
UniRef90_P02688	-4.72711	-4.72711	2.41715	1.70919	3.63834	7	2	Myelin basic protein S
UniRef90_P02768	-5.56018	-4.75738	3.17963	1.58981	3.56549	14	4	Serum albumin
UniRef90_Q02252	-4.82119	-4.85798	0.633533	0.283324	3.33333	11	5	Methylmalonate-semialdehyde dehydrogenase [acylating], mitochondrial
UniRef90_Q8BJ64	-4.96	-4.96	0.582035	0.411561	3.11285	8	2	Choline dehydrogenase, mitochondrial
UniRef90_Q8BWT1	-5.6202	-5.52552	0.585216	0.292608	2.12483	13	4	3-ketoacyl-CoA thiolase, mitochondrial
UniRef90_P63325	-5.83329	-5.83329	3.03206	2.14399	1.72367	3	2	40S ribosomal protein S10
UniRef90_Q00577	-6.10535	-5.97931	0.291258	0.145629	1.56034	9	4	Transcriptional activator protein Pur-alpha

## Sheet: control 30h
UniRef90	Mean	Median	Std Dev	Std Err	Incorporation (%)	N (all peptides)	N (quanti peptides)	Cluster Name
UniRef90_P70232	4.11117	4.53282	1.58454	0.914832	95.8589	4	3	Processed neural cell adhesion molecule L1-like protein
UniRef90_P21263	3.38465	3.27928	0.792319	0.21975	90.6618	54	13	Nestin
UniRef90_P08226	3.22702	3.23786	0.791271	0.299072	90.4159	27	7	Apolipoprotein E
UniRef90_P14923	3.06363	3.06363	1.15816	0.818943	89.3171	4	2	Junction plakoglobin
UniRef90_P35762	2.99398	2.99398	0.443491	0.313595	88.8476	3	2	CD81 antigen
UniRef90_P15311	2.63769	2.65737	1.00624	0.410797	86.3179	13	6	Ezrin
UniRef90_P06837	2.45882	2.45882	0.505185	0.35722	84.6098	4	2	Neuromodulin
UniRef90_P18589	2.42588	2.42588	2.4685	1.74549	84.3102	4	2	Interferon-induced GTP-binding protein Mx2
UniRef90_Q63663	2.62664	2.37653	1.16916	0.58458	83.8524	12	4	Interferon-induced guanylate-binding protein 2
UniRef90_P11627	2.34064	2.34064	0.0568326	0.0401867	83.5126	8	2	Neural cell adhesion molecule L1
UniRef90_Q9QZF2	2.25488	2.25488	3.52658	2.49367	82.6779	7	2	Secreted glypican-1
UniRef90_Q641P2	2.1702	2.1702	0.619473	0.438034	81.821	5	2	Stau1 protein (Fragment)
UniRef90_Q9QUN6	2.01431	2.01431	0.222108	0.157054	80.1583	2	2	Decay accelerating factor (GPI-form)
UniRef90_Q0VBD0	2.15435	1.93788	1.06167	0.612957	79.3021	7	3	Integrin beta
UniRef90_Q60780	1.74096	1.80591	0.21682	0.0969647	77.7605	11	5	Growth arrest-specific protein 7
UniRef90_Q14764	2.17032	1.76611	0.860436	0.496773	77.2798	5	3	Major vault protein
UniRef90_P42892	1.75129	1.75129	2.18081	1.54207	77.0989	5	2	Endothelin-converting enzyme 1
UniRef90_Q9Y696	1.68404	1.70609	0.168732	0.0688847	76.541	9	6	Chloride intracellular channel protein 4
UniRef90_Q8NFZ8	1.67007	1.67007	0.663495	0.469162	76.0898	8	2	Cell adhesion molecule 4
UniRef90_Q8R1F1	1.72718	1.63547	0.555054	0.277527	75.6506	8	4	Niban-like protein 1
UniRef90_O00410	1.59877	1.57777	0.617852	0.276312	74.9064	12	5	Importin-5
UniRef90_Q3UYN1	1.52612	1.52612	1.44506	1.02181	74.2275	2	2	Putative uncharacterized protein
UniRef90_P08699	1.48331	1.48331	0.351927	0.24885	73.6558	4	2	Galectin-3
UniRef90_Q96PU8	1.44985	1.44985	0.180905	0.127919	73.2032	3	2	Protein quaking
UniRef90_P14873	0.892773	1.33686	1.13176	0.462039	71.6393	8	6	MAP1 light chain LC1
UniRef90_A1A5P0	1.29842	1.29842	0.620196	0.438545	71.0949	6	2	Cdc42 effector protein 1
UniRef90_Q8WUM4	1.24015	1.2723	0.872725	0.390295	70.7214	9	5	Programmed cell death 6-interacting protein
UniRef90_Q14444	1.25859	1.25859	0.629459	0.445095	70.5243	3	2	Caprin-1
UniRef90_Q13283	1.22916	1.22916	0.167219	0.118241	70.0984	2	2	Ras GTPase-activating protein-binding protein 1
UniRef90_P10960	1.02069	1.13289	0.38632	0.172767	68.6813	10	5	Sulfated glycoprotein 1
UniRef90_O00299	0.945293	1.09851	0.30995	0.17895	68.1663	6	3	Chloride intracellular channel protein 1
UniRef90_Q8R2Y2	0.728664	1.07858	1.33822	0.423182	67.8659	16	10	Cell surface glycoprotein MUC18
UniRef90_B2RDW1	0.931064	1.03801	0.674595	0.301688	67.2495	9	5	Ribosomal protein S27a, isoform CRA_c
UniRef90_Q865V6	1.03186	1.03186	0.410225	0.290073	67.1555	5	2	Macrophage-capping protein
UniRef90_Q07076	1.01206	1.01159	0.188618	0.108899	66.8449	12	3	Annexin A7
UniRef90_P83731	0.776807	1.00674	1.28818	0.644092	66.7704	5	4	60S ribosomal protein L24
UniRef90_Q5R1W9	0.676215	0.943416	1.00872	0.336242	65.7895	14	9	L-lactate dehydrogenase A chain
UniRef90_P37802	0.877924	0.884707	0.177493	0.0887463	64.8678	20	4	Transgelin-2
UniRef90_P13693	0.86673	0.86673	0.217238	0.153611	64.5833	2	2	Translationally-controlled tumor protein
UniRef90_Q13492	0.612494	0.833462	0.640831	0.261618	64.0541	12	6	Phosphatidylinositol-binding clathrin assembly protein
UniRef90_Q38PG3	0.447632	0.782213	1.24013	0.506282	63.2321	7	6	AHNAK 1 (Fragment)
UniRef90_P35221	0.707704	0.77596	0.513569	0.107086	63.1313	37	23	Catenin alpha-1
UniRef90_Q63610	0.697029	0.697029	0.0463028	0.032741	61.849	9	2	Tropomyosin alpha-3 chain
UniRef90_Q38PG2	0.58381	0.666576	1.05077	0.60666	61.3497	3	3	AHNAK 1 (Fragment)
UniRef90_B7ZLX0	0.624254	0.655172	0.420125	0.187886	61.1621	10	5	ITGAV protein
UniRef90_Q9CX34	0.63594	0.63594	0.615221	0.435027	60.845	3	2	Suppressor of G2 allele of SKP1 homolog
UniRef90_P14602	0.566147	0.592342	0.363722	0.148489	60.1227	10	6	Heat shock protein beta-1
UniRef90_P13596	0.202737	0.58208	1.84129	0.555168	59.952	16	11	Neural cell adhesion molecule 1
UniRef90_P01830	0.766329	0.575615	2.04469	1.1805	59.8444	5	3	Thy-1 membrane glycoprotein
UniRef90_Q6UL10	0.614304	0.564905	0.214742	0.123981	59.6659	3	3	AHNAK (Fragment)
UniRef90_Q09666	0.49088	0.530876	1.00391	0.501953	59.097	4	4	Neuroblast differentiation-associated protein AHNAK
UniRef90_P10605	0.186657	0.518701	0.852976	0.492466	58.8928	8	3	Cathepsin B heavy chain
UniRef90_Q9H444	0.488111	0.488111	0.154385	0.109167	58.3786	3	2	Charged multivesicular body protein 4b
UniRef90_Q4QR73	0.467974	0.467974	0.284107	0.200894	58.039	3	2	DnaJ (Hsp40) homolog, subfamily A, member 4
UniRef90_P16330	0.501294	0.461971	0.203189	0.0433201	57.9376	31	22	2&apos;,3&apos;-cyclic-nucleotide 3&apos;-phosphodiesterase
UniRef90_P31689	0.495964	0.445019	0.309604	0.154802	57.651	6	4	DnaJ homolog subfamily A member 1
UniRef90_Q99P72	0.513213	0.42082	0.639002	0.192666	57.241	14	11	Reticulon-4
UniRef90_Q9Y639	0.368771	0.368771	2.8034	1.9823	56.3558	3	2	Neuroplastin
UniRef90_Q62465	0.394362	0.348422	0.121298	0.0383578	56.0085	17	10	Synaptic vesicle membrane protein VAT-1 homolog
UniRef90_O88447	0.315785	0.334331	0.0862733	0.0431366	55.7677	5	4	Kinesin light chain 1
UniRef90_P55036	0.311004	0.311004	0.158036	0.111749	55.3685	2	2	26S proteasome non-ATPase regulatory subunit 4
UniRef90_Q04637	0.294862	0.294862	0.55504	0.392473	55.0919	3	2	Eukaryotic translation initiation factor 4 gamma 1
UniRef90_Q9UQ80	0.25614	0.283285	0.22448	0.11224	54.8932	8	4	Proliferation-associated protein 2G4
UniRef90_O70419	0.273256	0.273256	0.236184	0.167007	54.7211	3	2	Cortactin isoform C
UniRef90_O00629	0.260064	0.260064	0.428094	0.302708	54.4944	4	2	Importin subunit alpha-4
UniRef90_P52594	0.257427	0.257427	0.2977	0.210506	54.4491	3	2	Arf-GAP domain and FG repeats-containing protein 1
UniRef90_P62191	0.234166	0.234166	0.866457	0.612677	54.0489	2	2	26S protease regulatory subunit 4
UniRef90_Q62393	0.19499	0.19499	1.20903	0.854915	53.3738	2	2	Tumor protein D52
UniRef90_Q9Y3A3	0.1938	0.1938	1.49587	1.05774	53.3533	2	2	Mps one binder kinase activator-like 3
UniRef90_Q06323	0.155066	0.14401	0.550245	0.317684	52.4934	4	3	Proteasome activator complex subunit 1
UniRef90_P14562	-0.0776169	0.103147	0.751525	0.433893	51.7866	5	3	Lysosome-associated membrane glycoprotein 1
UniRef90_P07825	0.0873955	0.0987173	0.0776517	0.0388259	51.71	6	4	Synaptophysin
UniRef90_Q7TP42	-0.0800584	0.086201	0.371721	0.214613	51.4933	3	3	Ab2-292
UniRef90_P27274	0.0542204	0.0542204	0.252506	0.178549	50.9395	5	2	CD59 glycoprotein
UniRef90_Q13491	0.0513023	0.0513023	0.172098	0.121692	50.8889	2	2	Neuronal membrane glycoprotein M6-b
UniRef90_O75822	0.0466932	0.0466932	0.204077	0.144304	50.8091	2	2	Eukaryotic translation initiation factor 3 subunit J
UniRef90_Q9R111	0.0390077	0.0390077	1.37544	0.97258	50.6759	4	2	Guanine deaminase
UniRef90_Q5QD51	0.0477747	0.0306192	0.366123	0.122041	50.5306	11	9	A-kinase anchor protein 12
UniRef90_Q6TXE9	-0.124994	0.0262051	0.476953	0.158984	50.4541	16	9	LRRGT00050
UniRef90_Q96SB3	0.0255501	0.0255501	0.890419	0.629621	50.4427	3	2	Neurabin-2
UniRef90_Q9Y490	-0.00551839	0.00868224	0.417688	0.107846	50.1505	29	15	Talin-1
UniRef90_Q14240	0.0469953	-0.0143553	0.95885	0.553592	49.7512	4	3	Eukaryotic initiation factor 4A-II
UniRef90_P43034	-0.0176712	-0.0176712	0.206231	0.145828	49.6938	4	2	Platelet-activating factor acetylhydrolase IB subunit alpha
UniRef90_Q62446	-0.0433919	-0.0433919	4.38729	3.10229	49.2481	4	2	FK506-binding protein 3
UniRef90_Q9QZ06	-0.0441658	-0.0441658	1.06762	0.754922	49.2347	4	2	Toll-interacting protein
UniRef90_Q62417	-0.0679119	-0.0679119	0.13518	0.0955868	48.8234	4	2	Sorbin and SH3 domain-containing protein 1
UniRef90_P07355	-0.160901	-0.0703893	0.156119	0.0493691	48.7805	15	10	Annexin A2
UniRef90_Q7TP47	-0.0812984	-0.0812984	1.10682	0.78264	48.5916	5	2	Heterogeneous nuclear ribonucleoprotein Q
UniRef90_P35222	-0.0826569	-0.0826569	0.370767	0.262172	48.5681	12	2	Catenin beta-1
UniRef90_P08238	-0.0766985	-0.0838074	0.129289	0.0373226	48.5481	22	12	Heat shock protein HSP 90-beta
UniRef90_P27214	-0.086685	-0.0840643	0.101064	0.0583493	48.5437	5	3	Annexin A11
UniRef90_Q8NBU5	0.167967	-0.0840643	0.942534	0.544172	48.5437	5	3	ATPase family AAA domain-containing protein 1
UniRef90_Q63258	-0.0952379	-0.0952379	0.447158	0.316188	48.3503	6	2	Integrin alpha-7 light chain
UniRef90_Q15417	-0.0803749	-0.111031	0.484188	0.108268	48.0769	28	20	Calponin-3
UniRef90_Q15555	0.151014	-0.111031	0.601497	0.347274	48.0769	4	3	Microtubule-associated protein RP/EB family member 2
UniRef90_Q9UNZ2	-0.17957	-0.116453	0.315254	0.157627	47.9831	10	4	NSFL1 cofactor p47
UniRef90_P19157	-0.14743	-0.123356	0.261421	0.130711	47.8637	8	4	Glutathione S-transferase P 1
UniRef90_P34897	-0.426533	-0.124328	0.846941	0.378763	47.8469	5	5	Serine hydroxymethyltransferase, mitochondrial
UniRef90_Q02750	-0.1247	-0.124328	0.28654	0.165434	47.8469	4	3	Dual specificity mitogen-activated protein kinase kinase 1
UniRef90_O35685	0.248995	-0.137504	0.680773	0.393044	47.619	4	3	Nuclear migration protein nudC
UniRef90_Q92597	-0.263009	-0.137504	0.268742	0.101575	47.619	16	7	Protein NDRG1
UniRef90_Q9JI55	-0.230616	-0.137504	0.795708	0.265236	47.619	42	9	Plectin-1 (Fragment)
UniRef90_P55209	-0.595419	-0.159809	1.41844	0.709221	47.2335	6	4	Nucleosome assembly protein 1-like 1
UniRef90_P05556	-0.255516	-0.163499	0.320576	0.0889117	47.1698	16	13	Integrin beta-1
UniRef90_Q14118	0.96642	-0.163499	2.07523	1.19813	47.1698	5	3	Beta-dystroglycan
UniRef90_Q9Y5M8	-0.183109	-0.183109	0.661364	0.467655	46.8312	4	2	Signal recognition particle receptor subunit beta
UniRef90_P13639	-0.262838	-0.201634	0.160758	0.0718932	46.5116	12	5	Elongation factor 2
UniRef90_Q8NC51	-0.205605	-0.205605	0.114942	0.0812765	46.4432	3	2	Plasminogen activator inhibitor 1 RNA-binding protein
UniRef90_Q9QYR6	-0.212595	-0.212595	1.16394	0.823029	46.3227	6	2	MAP1 light chain LC2
UniRef90_P37837	-0.0479586	-0.213642	0.495231	0.17509	46.3046	11	8	Transaldolase
UniRef90_P40240	-0.231477	-0.226034	0.0674234	0.0337117	46.0911	8	4	CD9 antigen
UniRef90_P50990	-0.243467	-0.232543	0.214514	0.107257	45.979	6	4	T-complex protein 1 subunit theta
UniRef90_P28658	-0.23353	-0.23353	2.18451	1.54468	45.962	4	2	Ataxin-10
UniRef90_P68104	-0.378877	-0.235464	0.427044	0.150983	45.9288	10	8	Elongation factor 1-alpha 1
UniRef90_B1AU72	-0.246475	-0.246475	1.90646	1.34807	45.7393	3	2	Motile sperm domain containing 2
UniRef90_Q9ESN0	-0.287623	-0.250962	0.379909	0.0731135	45.6621	49	27	Protein Niban
UniRef90_P13674	-0.157725	-0.263034	0.580215	0.334987	45.4545	5	3	Prolyl 4-hydroxylase subunit alpha-1
UniRef90_P51149	-0.262433	-0.263034	0.233564	0.134848	45.4545	4	3	Ras-related protein Rab-7a
UniRef90_Q99613	-0.27729	-0.27729	0.829647	0.586649	45.2097	3	2	Eukaryotic translation initiation factor 3 subunit C
UniRef90_P04075	-0.280944	-0.280944	0.00839626	0.00593705	45.1469	4	2	Fructose-bisphosphate aldolase A
UniRef90_P30999	-0.282018	-0.282018	0.167612	0.11852	45.1285	13	2	Catenin delta-1
UniRef90_O55158	-0.284823	-0.284823	0.928124	0.656283	45.0804	3	2	D6.1A protein
UniRef90_O00231	-0.184788	-0.286881	0.346331	0.130901	45.045	10	7	26S proteasome non-ATPase regulatory subunit 11
UniRef90_O15126	-0.345686	-0.286881	0.168828	0.097473	45.045	4	3	Secretory carrier-associated membrane protein 1
UniRef90_Q13177	-0.22522	-0.298468	0.464192	0.189506	44.8463	7	6	PAK-2p34
UniRef90_P33176	-0.161766	-0.298658	0.623707	0.207902	44.843	20	9	Kinesin-1 heavy chain
UniRef90_Q61490	-0.501404	-0.304726	0.921583	0.376235	44.739	12	6	CD166 antigen
UniRef90_P21333	-0.326475	-0.31034	0.169221	0.0410421	44.6429	37	17	Filamin-A
UniRef90_Q63377	-0.152266	-0.31034	0.829726	0.414863	44.6429	6	4	Sodium/potassium-transporting ATPase subunit beta-3
UniRef90_P34022	-0.546307	-0.321928	1.15293	0.665646	44.4444	3	3	Ran-specific GTPase-activating protein
UniRef90_P30416	-0.327378	-0.327378	0.792168	0.560147	44.3512	5	2	FK506-binding protein 4, N-terminally processed
UniRef90_Q8CBW3	-0.355747	-0.355747	0.0478278	0.0338194	43.8664	3	2	Abl interactor 1
UniRef90_Q13765	-0.365667	-0.367371	0.30609	0.136888	43.6681	7	5	Nascent polypeptide-associated complex subunit alpha
UniRef90_O15371	-0.332997	-0.373801	0.261367	0.130683	43.5585	6	4	Eukaryotic translation initiation factor 3 subunit D
UniRef90_P40227	-0.322359	-0.378512	0.381337	0.127112	43.4783	11	9	T-complex protein 1 subunit zeta
UniRef90_P50454	-0.0635701	-0.378512	0.753014	0.227042	43.4783	21	11	Serpin H1
UniRef90_P08670	-0.392681	-0.389567	0.189113	0.0412679	43.29	67	21	Vimentin
UniRef90_P54578	-0.414645	-0.394552	0.0914596	0.0457298	43.2052	9	4	Ubiquitin carboxyl-terminal hydrolase 14
UniRef90_P53367	-0.398465	-0.398465	0.208601	0.147503	43.1387	2	2	Arfaptin-1
UniRef90_P30153	-0.3543	-0.400372	0.183203	0.0747925	43.1063	17	6	Serine/threonine-protein phosphatase 2A 65 kDa regulatory subunit A alpha isoform
UniRef90_O43707	-0.240542	-0.400497	0.593436	0.112149	43.1042	41	28	Alpha-actinin-4
UniRef90_Q14974	-0.496162	-0.400497	0.2329	0.0950809	43.1042	14	6	Importin subunit beta-1
UniRef90_P67936	-0.451734	-0.422233	0.102353	0.0590935	42.735	5	3	Tropomyosin alpha-4 chain
UniRef90_Q8IUD2	-0.42911	-0.42911	1.00182	0.708394	42.6184	4	2	ELKS/RAB6-interacting/CAST family member 1
UniRef90_Q9H223	-0.443147	-0.432959	0.383202	0.171373	42.5532	8	5	EH domain-containing protein 4
UniRef90_P54920	-0.438047	-0.438047	0.0376478	0.026621	42.467	7	2	Alpha-soluble NSF attachment protein
UniRef90_Q9UNM6	-0.433304	-0.445009	0.858734	0.429367	42.3491	6	4	26S proteasome non-ATPase regulatory subunit 13
UniRef90_P25189	-0.276171	-0.454137	1.46847	0.464371	42.1947	16	10	Myelin protein P0
UniRef90_O60884	-0.784812	-0.454176	0.564379	0.252398	42.1941	6	5	DnaJ homolog subfamily A member 2
UniRef90_P45952	-0.460794	-0.460794	2.59913	1.83786	42.0822	3	2	Medium-chain specific acyl-CoA dehydrogenase, mitochondrial
UniRef90_P26453	-0.470102	-0.470102	0.242458	0.171444	41.9251	5	2	Basigin
UniRef90_Q00341	-0.472647	-0.472647	0.755966	0.534549	41.8821	6	2	Vigilin
UniRef90_A7YY80	-1.04294	-0.474151	1.19539	0.597695	41.8568	7	4	Epb4.1l3 protein
UniRef90_Q15691	-0.719364	-0.474749	0.622131	0.253984	41.8467	6	6	Microtubule-associated protein RP/EB family member 1
UniRef90_O15075	0.295158	-0.485427	1.87505	1.08256	41.6667	6	3	Serine/threonine-protein kinase DCLK1
UniRef90_P49368	-0.296815	-0.485427	0.721817	0.186372	41.6667	28	15	T-complex protein 1 subunit gamma
UniRef90_Q9UNF0	-0.0718788	-0.485427	0.751758	0.434028	41.6667	4	3	Protein kinase C and casein kinase substrate in neurons protein 2
UniRef90_P13797	-0.46465	-0.495114	0.226279	0.11314	41.5035	5	4	Plastin-3
UniRef90_P38646	-0.75428	-0.495695	0.726408	0.21902	41.4938	23	11	Stress-70 protein, mitochondrial
UniRef90_B7Z4T9	-0.392069	-0.505891	0.583481	0.220535	41.3223	11	7	cDNA FLJ54074, highly similar to T-complex protein 1 subunit eta
UniRef90_Q91XV3	-0.533269	-0.533269	0.126801	0.0896618	40.863	2	2	Brain acid soluble protein 1
UniRef90_P27635	-0.435546	-0.536053	0.327883	0.146634	40.8163	11	5	60S ribosomal protein L10
UniRef90_P35579	-0.563431	-0.549008	0.228579	0.0933169	40.5996	8	6	Myosin-9
UniRef90_Q9WVK4	-0.549243	-0.549243	0.194903	0.137817	40.5956	7	2	EH domain-containing protein 1
UniRef90_P53798	-0.550825	-0.550825	0.020891	0.0147721	40.5692	5	2	Squalene synthetase
UniRef90_P20340	-0.564956	-0.575312	0.39638	0.22885	40.1606	5	3	Ras-related protein Rab-6A
UniRef90_Q15365	-1.55199	-0.575312	1.76106	1.01675	40.1606	8	3	Poly(rC)-binding protein 1
UniRef90_P62195	-0.232048	-0.585539	1.01235	0.413289	39.9904	10	6	26S protease regulatory subunit 8
UniRef90_P62333	-0.614461	-0.588799	0.202484	0.101242	39.9362	12	4	26S protease regulatory subunit S10B
UniRef90_Q9UDT6	-0.697784	-0.613532	0.772231	0.25741	39.5257	13	9	CAP-Gly domain-containing linker protein 2
UniRef90_P62879	-0.535658	-0.62293	0.300062	0.173241	39.3701	5	3	Guanine nucleotide-binding protein G(I)/G(S)/G(T) subunit beta-2
UniRef90_Q01082	-0.441293	-0.632268	0.998329	0.217853	39.2157	51	21	Spectrin beta chain, brain 1
UniRef90_P17987	-0.777243	-0.641546	0.544663	0.243581	39.0625	11	5	T-complex protein 1 subunit alpha
UniRef90_P51665	-0.645802	-0.645802	0.0456368	0.0322701	38.9923	5	2	26S proteasome non-ATPase regulatory subunit 7
UniRef90_Q60737	-0.672492	-0.659925	0.357014	0.206122	38.7597	6	3	Casein kinase II subunit alpha
UniRef90_Q00169	-0.676266	-0.676266	0.102099	0.072195	38.4912	3	2	Phosphatidylinositol transfer protein alpha isoform
UniRef90_P52306	-0.452782	-0.678072	0.535399	0.239438	38.4615	7	5	Rap1 GTPase-GDP dissociation stimulator 1
UniRef90_P62826	-0.697641	-0.697641	0.344312	0.243465	38.141	2	2	GTP-binding nuclear protein Ran
UniRef90_P10096	-0.767367	-0.731157	0.187643	0.0541677	37.5944	17	12	Glyceraldehyde-3-phosphate dehydrogenase
UniRef90_P50502	-1.13349	-0.739201	0.901855	0.450927	37.4637	4	4	Hsc70-interacting protein
UniRef90_P09671	-0.665781	-0.739848	0.166513	0.0961361	37.4532	4	3	Superoxide dismutase [Mn], mitochondrial
UniRef90_Q5M7W5	-0.796715	-0.744155	0.51002	0.104107	37.3833	32	24	Microtubule-associated protein 4
UniRef90_P46940	-0.602972	-0.757023	0.578734	0.174495	37.1747	18	11	Ras GTPase-activating-like protein IQGAP1
UniRef90_O00303	-0.841115	-0.790772	0.557653	0.321961	36.63	5	3	Eukaryotic translation initiation factor 3 subunit F
UniRef90_P55072	-0.759638	-0.79421	0.368459	0.106365	36.5747	16	12	Transitional endoplasmic reticulum ATPase
UniRef90_P52565	-0.801956	-0.800611	0.727422	0.257182	36.4719	11	8	Rho GDP-dissociation inhibitor 1
UniRef90_Q8WWI5	-0.809871	-0.809871	0.238047	0.168325	36.3233	7	2	Choline transporter-like protein 1
UniRef90_P63244	-0.814993	-0.814993	0.0579781	0.0409967	36.2412	4	2	Guanine nucleotide-binding protein subunit beta-2-like 1
UniRef90_P06733	-0.893421	-0.815575	0.280377	0.093459	36.2319	14	9	Alpha-enolase
UniRef90_Q9CYZ2	-0.822989	-0.822989	0.167043	0.118117	36.1132	3	2	Tumor protein D54
UniRef90_P61981	-0.827813	-0.827813	0.00574728	0.00406394	36.0361	3	2	14-3-3 protein gamma, N-terminally processed
UniRef90_P00492	-0.831308	-0.831308	0.0573263	0.0405358	35.9803	3	2	Hypoxanthine-guanine phosphoribosyltransferase
UniRef90_Q92783	-0.831513	-0.831513	0.873119	0.617388	35.977	2	2	Signal transducing adapter molecule 1
UniRef90_Q91VG6	-0.831843	-0.831843	2.86539	2.02614	35.9718	3	2	Chchd3 protein (Fragment)
UniRef90_Q96AC1	-0.835216	-0.835216	0.509303	0.360131	35.9179	4	2	Fermitin family homolog 2
UniRef90_P45376	-0.85155	-0.85155	0.0508762	0.0359749	35.6578	3	2	Aldose reductase
UniRef90_Q13561	-0.984326	-0.863938	0.310826	0.139005	35.461	12	5	Dynactin subunit 2
UniRef90_Q62736	-0.792093	-0.871822	0.715901	0.206663	35.336	15	12	Non-muscle caldesmon
UniRef90_P50991	-1.0579	-0.873844	0.753553	0.307637	35.304	10	6	T-complex protein 1 subunit delta
UniRef90_Q15907	-1.14673	-0.887525	0.634515	0.211505	35.0877	15	9	Ras-related protein Rab-11B
UniRef90_O70371	-1.04772	-0.910733	0.323192	0.186595	34.7222	8	3	Lipocortin V (Fragment)
UniRef90_P14550	-0.826968	-0.910733	0.240472	0.138837	34.7222	4	3	Alcohol dehydrogenase [NADP+]
UniRef90_Q62418	-0.93072	-0.93072	0.128354	0.0907601	34.4089	5	2	Drebrin-like protein
UniRef90_P05023	-0.935405	-0.935405	2.62977	1.85953	34.3356	4	2	Sodium/potassium-transporting ATPase subunit alpha-1
UniRef90_O43242	-0.936631	-0.936631	0.218103	0.154222	34.3165	5	2	26S proteasome non-ATPase regulatory subunit 3
UniRef90_P11940	-0.963741	-0.945807	0.309092	0.109281	34.1732	17	8	Polyadenylate-binding protein 1
UniRef90_P08865	-1.23613	-0.970854	0.663383	0.296674	33.7838	13	5	40S ribosomal protein SA
UniRef90_Q5ZHW4	-3.03413	-0.970854	3.74548	2.16246	33.7838	4	3	Ras-related protein Rab-5B
UniRef90_Q9Y570	-1.32111	-0.992768	0.669011	0.386254	33.4448	3	3	Protein phosphatase methylesterase 1
UniRef90_P00558	-1.04153	-0.996384	0.368932	0.0869582	33.3891	24	18	Phosphoglycerate kinase 1
UniRef90_P57776	-0.953449	-0.998086	0.288444	0.144222	33.3628	9	4	Elongation factor 1-delta
UniRef90_P36578	-0.492911	-1.0072	1.22972	0.370776	33.2226	18	11	60S ribosomal protein L4
UniRef90_P62917	-0.991568	-1.01067	0.0683346	0.0341673	33.1692	6	4	60S ribosomal protein L8
UniRef90_P11142	-1.00059	-1.01078	0.913107	0.172561	33.1676	35	28	Heat shock cognate 71 kDa protein
UniRef90_A4D1M6	-1.01559	-1.01559	0.115992	0.0820191	33.0936	4	2	HCG19809
UniRef90_Q9UHB9	-1.01894	-1.01894	1.1033	0.78015	33.0423	5	2	Signal recognition particle 68 kDa protein
UniRef90_P25789	-1.09013	-1.02857	0.112815	0.065134	32.8947	4	3	Proteasome subunit alpha type-4
UniRef90_P63104	-1.16216	-1.03562	0.447238	0.115476	32.7869	17	15	14-3-3 protein zeta/delta
UniRef90_Q8CI51	-0.942085	-1.04563	0.505057	0.252529	32.6342	5	4	PDZ and LIM domain protein 5
UniRef90_P63010	-0.954788	-1.04902	0.629148	0.222438	32.5825	10	8	AP-2 complex subunit beta
UniRef90_Q15019	-0.983811	-1.04963	0.169972	0.0981337	32.5733	9	3	Septin-2
UniRef90_P09471	-1.0528	-1.05657	0.0348924	0.0174462	32.4678	8	4	Guanine nucleotide-binding protein G(o) subunit alpha
UniRef90_P22090	-1.06349	-1.06349	0.141439	0.100012	32.3627	5	2	40S ribosomal protein S4, Y isoform 1
UniRef90_Q5PPJ9	-0.903253	-1.0635	0.355629	0.205323	32.3625	5	3	Endophilin-B2
UniRef90_Q9Y6G9	-0.49246	-1.08406	1.94084	0.867972	32.0513	8	5	Cytoplasmic dynein 1 light intermediate chain 1
UniRef90_Q9Y371	-1.08496	-1.08496	0.707107	0.5	32.0377	3	2	Endophilin-B1
UniRef90_P78371	-1.10432	-1.10432	0.00948974	0.00671026	31.7463	3	2	T-complex protein 1 subunit beta
UniRef90_P04632	-1.11734	-1.11734	0.145646	0.102987	31.551	2	2	Calpain small subunit 1
UniRef90_P31948	-1.15989	-1.1375	0.261873	0.0726304	31.25	21	13	Stress-induced-phosphoprotein 1
UniRef90_Q91V76	-1.14128	-1.14128	3.95157	2.79418	31.1938	2	2	Ester hydrolase C11orf54 homolog
UniRef90_Q9JM96	-0.933133	-1.14405	0.387941	0.223978	31.1526	7	3	Cdc42 effector protein 4
UniRef90_P47911	-1.14948	-1.14948	0.316043	0.223476	31.072	3	2	60S ribosomal protein L6
UniRef90_O75381	-1.14972	-1.14972	0.392983	0.277881	31.0683	3	2	Peroxisomal membrane protein PEX14
UniRef90_P54714	-1.12446	-1.16298	0.514773	0.182	30.8719	13	8	Triosephosphate isomerase
UniRef90_P08133	-1.15443	-1.1635	0.513983	0.104916	30.8642	41	24	Annexin A6
UniRef90_Q8WW12	-1.18095	-1.1635	0.0866628	0.0500348	30.8642	3	3	PEST proteolytic signal-containing nuclear protein
UniRef90_Q16543	-1.21327	-1.16628	0.71356	0.35678	30.823	4	4	Hsp90 co-chaperone Cdc37
UniRef90_P53990	-1.16971	-1.16971	0.140462	0.0993219	30.7724	3	2	IST1 homolog
UniRef90_P17252	-1.14092	-1.18031	0.414242	0.207121	30.6161	6	4	Protein kinase C alpha type
UniRef90_P61019	-1.20076	-1.20076	0.0709949	0.0502009	30.3158	5	2	Ras-related protein Rab-2A
UniRef90_P46776	-1.20278	-1.20278	0.513103	0.362819	30.2863	3	2	60S ribosomal protein L27a
UniRef90_P61158	-1.00856	-1.20476	0.490176	0.200114	30.2572	12	6	Actin-related protein 3
UniRef90_Q8NHW5	-2.15417	-1.20789	1.59475	0.531585	30.2115	12	9	60S acidic ribosomal protein P0-like
UniRef90_P35611	-1.13085	-1.23065	0.486688	0.19869	29.88	11	6	Alpha-adducin
UniRef90_P61978	-1.37779	-1.23266	0.434608	0.194362	29.8507	10	5	Heterogeneous nuclear ribonucleoprotein K
UniRef90_P18669	-1.21704	-1.23299	0.347472	0.141855	29.846	11	6	Phosphoglycerate mutase 1
UniRef90_P46778	-1.32131	-1.23473	0.545049	0.272525	29.8207	7	4	60S ribosomal protein L21
UniRef90_P31939	-1.24167	-1.24167	0.351999	0.248901	29.7202	3	2	IMP cyclohydrolase
UniRef90_Q08209	-1.32969	-1.25701	0.237032	0.13685	29.4985	6	3	Serine/threonine-protein phosphatase 2B catalytic subunit alpha isoform
UniRef90_Q6NWC3	-1.49917	-1.25701	0.634851	0.239951	29.4985	11	7	Ribosomal protein S2
UniRef90_P62834	-1.25987	-1.25987	0.0298183	0.0210847	29.4573	5	2	Ras-related protein Rap-1A
UniRef90_Q13418	-1.0117	-1.27501	0.703882	0.406386	29.2398	11	3	Integrin-linked protein kinase
UniRef90_P63000	-1.34143	-1.28096	0.325256	0.145459	29.1545	8	5	Ras-related C3 botulinum toxin substrate 1
UniRef90_P70441	-1.22398	-1.28096	0.852087	0.491953	29.1545	5	3	Na(+)/H(+) exchange regulatory cofactor NHE-RF1
UniRef90_P62910	-1.31018	-1.31018	0.291101	0.205839	28.738	3	2	60S ribosomal protein L32
UniRef90_Q9HB71	-1.15411	-1.31034	0.386738	0.223283	28.7356	4	3	Calcyclin-binding protein
UniRef90_Q6NSU0	-1.33003	-1.33003	1.15119	0.814016	28.4569	2	2	Fam3c protein (Fragment)
UniRef90_Q5XI32	-1.33119	-1.33119	0.113466	0.0802323	28.4405	6	2	F-actin-capping protein subunit beta
UniRef90_P53987	-1.34582	-1.34582	0.303903	0.214892	28.2346	2	2	Monocarboxylate transporter 1
UniRef90_P61247	-1.33253	-1.3505	0.0834954	0.0278318	28.169	16	9	40S ribosomal protein S3a
UniRef90_P25787	-1.46157	-1.35614	0.267325	0.15434	28.0899	6	3	Proteasome subunit alpha type-2
UniRef90_P11233	0.0270559	-1.36041	3.00992	1.50496	28.0302	5	4	Ras-related protein Ral-A
UniRef90_Q925I1	-1.3732	-1.3732	2.08568	1.4748	27.8517	6	2	ATPase family AAA domain-containing protein 3
UniRef90_P25786	-1.37975	-1.37975	0.557551	0.394248	27.7606	4	2	Proteasome subunit alpha type-1
UniRef90_P10809	-1.39217	-1.38388	0.265019	0.0540967	27.7032	40	24	60 kDa heat shock protein, mitochondrial
UniRef90_P52943	-1.3894	-1.3894	0.0311517	0.0220276	27.6266	4	2	Cysteine-rich protein 2
UniRef90_P09936	-1.66334	-1.40599	0.834644	0.315466	27.3973	13	7	Ubiquitin carboxyl-terminal hydrolase isozyme L1
UniRef90_Q9NUQ9	-1.54676	-1.40599	0.553493	0.319559	27.3973	5	3	Protein FAM49B
UniRef90_A1A4T2	-1.41657	-1.41657	2.83263	2.00297	27.2517	7	2	Alpha glucosidase 2 alpha neutral subunit
UniRef90_P31040	-1.41671	-1.41671	1.94322	1.37406	27.2498	4	2	Succinate dehydrogenase [ubiquinone] flavoprotein subunit, mitochondrial
UniRef90_Q9UPY8	-1.41966	-1.41966	0.121953	0.0862336	27.2093	3	2	Microtubule-associated protein RP/EB family member 3
UniRef90_O35459	-1.42184	-1.42184	0.182518	0.129059	27.1793	5	2	Delta(3,5)-Delta(2,4)-dienoyl-CoA isomerase, mitochondrial
UniRef90_P52209	-1.5682	-1.42761	0.412008	0.237873	27.1003	4	3	6-phosphogluconate dehydrogenase, decarboxylating
UniRef90_P08553	-0.55254	-1.44089	2.24096	1.12048	26.9187	5	4	Neurofilament medium polypeptide
UniRef90_P27361	-1.57359	-1.44361	0.187594	0.0709038	26.8817	12	7	Mitogen-activated protein kinase 3
UniRef90_C0SSX6	-1.44614	-1.44614	0.0262069	0.018531	26.8473	2	2	14-3-3epsilon (Fragment)
UniRef90_Q9Y3I0	-1.56268	-1.4489	0.604351	0.270274	26.8097	6	5	UPF0027 protein C22orf28
UniRef90_P26373	-0.953575	-1.46716	1.21587	0.607937	26.562	10	4	60S ribosomal protein L13
UniRef90_P25788	-1.46804	-1.46804	0.103207	0.0729782	26.5501	6	2	Proteasome subunit alpha type-3
UniRef90_Q15404	-1.54995	-1.48266	0.35364	0.17682	26.353	7	4	Ras suppressor protein 1
UniRef90_O08795	-1.35181	-1.48543	0.553152	0.247377	26.3158	10	5	Glucosidase 2 subunit beta
UniRef90_P32969	-2.30466	-1.5008	1.4609	0.843451	26.1097	4	3	60S ribosomal protein L9
UniRef90_P28838	-1.50655	-1.50655	0.396042	0.280044	26.0328	6	2	Cytosol aminopeptidase
UniRef90_P07237	-1.31471	-1.51251	1.01344	0.270852	25.9533	18	14	Protein disulfide-isomerase
UniRef90_Q14204	-1.51077	-1.51338	0.551261	0.0831057	25.9418	81	44	Cytoplasmic dynein 1 heavy chain 1
UniRef90_Q06830	-1.56885	-1.51513	0.19641	0.0694413	25.9185	12	8	Peroxiredoxin-1
UniRef90_Q9DCN2	-1.67599	-1.53093	0.351138	0.175569	25.7088	8	4	NADH-cytochrome b5 reductase 3 soluble form
UniRef90_P22314	-1.53294	-1.53294	0.0599218	0.0423711	25.6822	6	2	Ubiquitin-like modifier-activating enzyme 1
UniRef90_P26645	-0.894552	-1.53605	1.26808	0.479289	25.641	11	7	Myristoylated alanine-rich C-kinase substrate
UniRef90_Q96CW1	-1.59591	-1.53605	0.853416	0.49272	25.641	3	3	AP-2 complex subunit mu
UniRef90_P26638	-1.58883	-1.54102	0.194944	0.112551	25.5754	7	3	Seryl-tRNA synthetase, cytoplasmic
UniRef90_Q920E5	-1.54948	-1.54948	0.0905838	0.0640524	25.464	3	2	Geranyltranstransferase
UniRef90_P16435	-1.60105	-1.5656	1.09314	0.631127	25.2525	4	3	NADPH--cytochrome P450 reductase
UniRef90_Q9NZR1	-1.54725	-1.58015	0.19377	0.111873	25.0627	5	3	Tropomodulin-2
UniRef90_Q7L099	-2.12157	-1.58976	1.24898	0.721099	24.9377	7	3	Protein RUFY3
UniRef90_P26640	-0.847165	-1.59455	2.48607	1.43534	24.8756	6	3	Valyl-tRNA synthetase
UniRef90_O94973	-1.60845	-1.59932	0.417338	0.186639	24.8139	8	5	AP-2 complex subunit alpha-2
UniRef90_Q6AYG5	-1.60349	-1.60349	2.12963	1.50587	24.76	3	2	Enoyl-CoA hydratase domain-containing protein 1
UniRef90_Q9H115	-1.72607	-1.62761	0.639676	0.286072	24.4499	7	5	Beta-soluble NSF attachment protein
UniRef90_P84098	-1.63106	-1.63106	0.923288	0.652863	24.4057	4	2	60S ribosomal protein L19
UniRef90_Q9P0L0	-1.69535	-1.63688	0.611112	0.216061	24.3313	10	8	Vesicle-associated membrane protein-associated protein A
UniRef90_P54728	-1.63721	-1.63721	0.108174	0.0764904	24.3272	3	2	UV excision repair protein RAD23 homolog B
UniRef90_P49006	-1.72433	-1.65076	0.53839	0.31084	24.1546	4	3	MARCKS-related protein
UniRef90_Q29099	-1.53882	-1.66448	0.337001	0.194568	23.9808	5	3	Polypyrimidine tract-binding protein 1
UniRef90_P10637	-1.66894	-1.66894	0.379579	0.268403	23.9245	3	2	Microtubule-associated protein tau
UniRef90_Q91V92	-1.49141	-1.68348	1.16869	0.413196	23.7416	23	8	ATP-citrate synthase
UniRef90_Q6QI16	-1.68397	-1.68397	1.20503	0.852088	23.7355	2	2	LRRGT00192
UniRef90_P19137	-1.4808	-1.68508	2.88275	1.17688	23.7215	28	6	Laminin subunit alpha-1
UniRef90_Q9QY76	-1.69265	-1.69265	0.582218	0.41169	23.6267	2	2	Vesicle-associated membrane protein-associated protein B
UniRef90_Q9QZR6	-1.88299	-1.69294	1.92316	0.555168	23.623	23	12	Septin-9
UniRef90_Q00610	-1.93328	-1.70929	0.49107	0.126794	23.4192	35	15	Clathrin heavy chain 1
UniRef90_P46782	-1.73497	-1.7137	0.0487791	0.0281626	23.3645	13	3	40S ribosomal protein S5, N-terminally processed
UniRef90_P23396	-1.62396	-1.7166	1.73748	0.709324	23.3285	8	6	40S ribosomal protein S3
UniRef90_Q86VP6	-1.71776	-1.71776	0.229025	0.161945	23.3141	3	2	Cullin-associated NEDD8-dissociated protein 1
UniRef90_P62241	-1.77592	-1.72247	0.404771	0.233694	23.2558	4	3	40S ribosomal protein S8
UniRef90_O70252	-1.74555	-1.74555	0.449647	0.317948	22.9714	3	2	Heme oxygenase 2
UniRef90_Q68FX0	-1.64655	-1.75008	0.556764	0.278382	22.9159	11	4	Isocitrate dehydrogenase [NAD] subunit beta, mitochondrial
UniRef90_P62750	-1.74184	-1.75275	0.268968	0.120286	22.8833	8	5	60S ribosomal protein L23a
UniRef90_P46781	-1.75571	-1.75571	0.549192	0.388338	22.8471	6	2	40S ribosomal protein S9
UniRef90_Q05CS7	-1.78464	-1.78464	0.289202	0.204497	22.4955	2	2	Eea1 protein (Fragment)
UniRef90_Q96AG4	-1.78744	-1.78785	0.192077	0.0960384	22.4568	6	4	Leucine-rich repeat-containing protein 59
UniRef90_Q9CPV4	-1.79847	-1.79847	0.479469	0.339036	22.3289	2	2	Glyoxalase domain-containing protein 4
UniRef90_P09525	-1.9489	-1.81193	0.364828	0.14894	22.1674	15	6	Annexin A4
UniRef90_P17980	-1.33387	-1.82375	1.15529	0.667006	22.0264	4	3	26S protease regulatory subunit 6A
UniRef90_Q14CZ8	-1.88575	-1.83188	0.239212	0.138109	21.9298	6	3	Hepatocyte cell adhesion molecule
UniRef90_Q8BMS1	-1.8547	-1.8547	2.13528	1.50987	21.6602	10	2	Long chain 3-hydroxyacyl-CoA dehydrogenase
UniRef90_Q9NTK5	-1.97849	-1.85572	0.405409	0.202705	21.6482	6	4	Obg-like ATPase 1
UniRef90_Q16181	-1.9002	-1.85997	0.266413	0.119144	21.5983	14	5	Septin-7
UniRef90_O60749	-1.95883	-1.87455	0.916128	0.458064	21.4276	7	4	Sorting nexin-2
UniRef90_Q9NVD7	-2.00662	-1.88362	0.394681	0.176507	21.322	7	5	Alpha-parvin
UniRef90_P06745	-1.84284	-1.89705	1.31626	0.465367	21.1662	11	8	Glucose-6-phosphate isomerase
UniRef90_P24268	-2.22274	-1.90633	1.88853	0.944263	21.0591	8	4	Cathepsin D 30 kDa heavy chain
UniRef90_O70503	-1.87761	-1.90907	0.196762	0.0983811	21.0276	4	4	Estradiol 17-beta-dehydrogenase 12
UniRef90_P62280	-1.92492	-1.92492	0.703307	0.497313	20.8457	5	2	40S ribosomal protein S11
UniRef90_O88398	-1.97629	-1.93357	0.36706	0.164154	20.7469	8	5	Advillin
UniRef90_Q99497	-1.93603	-1.93603	0.135864	0.0960706	20.7189	2	2	Protein DJ-1
UniRef90_Q9UN36	-2.07393	-1.963	0.585364	0.292682	20.4135	8	4	Protein NDRG2
UniRef90_Q9BVK6	-1.96443	-1.96443	0.744072	0.526139	20.3974	5	2	Transmembrane emp24 domain-containing protein 9
UniRef90_Q3T025	-1.91674	-1.97085	0.753547	0.336996	20.3252	6	5	60S ribosomal protein L17
UniRef90_P27824	-1.83377	-1.97453	0.593867	0.153336	20.284	21	15	Calnexin
UniRef90_Q66JR7	-2.0124	-2.0124	0.10615	0.0750592	19.8628	4	2	Pgm2 protein (Fragment)
UniRef90_P62717	-2.01626	-2.01626	0.630449	0.445795	19.8203	4	2	60S ribosomal protein L18a
UniRef90_Q6PB66	-2.18837	-2.02148	0.856496	0.494498	19.7628	6	3	Leucine-rich PPR motif-containing protein, mitochondrial
UniRef90_P97891	-2.0216	-2.0216	0.9411	0.665458	19.7615	2	2	Translin
UniRef90_Q9CR57	-1.94322	-2.02411	1.2882	0.644101	19.734	5	4	60S ribosomal protein L14
UniRef90_Q9UNX3	-2.056	-2.02857	0.189742	0.084855	19.685	9	5	60S ribosomal protein L26-like 1
UniRef90_P20618	-1.58784	-2.03562	0.844695	0.487685	19.6078	5	3	Proteasome subunit beta type-1
UniRef90_P51572	-2.47648	-2.04614	0.982001	0.439164	19.4932	7	5	B-cell receptor-associated protein 31
UniRef90_P11177	-2.04904	-2.04904	1.17197	0.828707	19.4617	4	2	Pyruvate dehydrogenase E1 component subunit beta, mitochondrial
UniRef90_P32119	-2.02605	-2.05799	0.408329	0.204165	19.3646	7	4	Peroxiredoxin-2
UniRef90_P70296	-2.06349	-2.06349	0.100022	0.0707263	19.3051	4	2	Hippocampal cholinergic neurostimulating peptide
UniRef90_P42766	-2.057	-2.06695	0.115009	0.0664002	19.2678	4	3	60S ribosomal protein L35
UniRef90_O00429	-2.22578	-2.08746	0.514148	0.296844	19.0476	7	3	Dynamin-1-like protein
UniRef90_Q9UBS4	-2.092	-2.092	0.676653	0.478466	18.9992	2	2	DnaJ homolog subfamily B member 11
UniRef90_Q6IRK8	-2.09442	-2.09622	0.425683	0.173784	18.9542	7	6	Spna2 protein
UniRef90_Q4V8F9	-2.10329	-2.10329	0.639968	0.452526	18.879	4	2	Hydroxysteroid dehydrogenase-like protein 2
UniRef90_P43686	-2.1218	-2.1218	1.42945	1.01077	18.6833	3	2	26S protease regulatory subunit 6B
UniRef90_P11021	-2.18387	-2.13231	0.139079	0.0695393	18.5729	6	4	78 kDa glucose-regulated protein
UniRef90_Q14847	-2.13361	-2.13361	0.178778	0.126415	18.5593	7	2	LIM and SH3 domain protein 1
UniRef90_P05141	-1.1818	-2.14731	1.99094	1.14947	18.4162	6	3	ADP/ATP translocase 2
UniRef90_P30101	-2.12436	-2.14893	1.05239	0.198884	18.3993	45	28	Protein disulfide-isomerase A3
UniRef90_P62847	-2.19391	-2.17313	0.155707	0.0898977	18.1488	6	3	40S ribosomal protein S24
UniRef90_Q8VBT0	-2.18481	-2.18481	0.787999	0.5572	18.0289	3	2	Thioredoxin-related transmembrane protein 1
UniRef90_P09417	-1.54663	-2.19023	1.70792	0.60384	17.9734	9	8	Dihydropteridine reductase
UniRef90_O08553	-2.10724	-2.21243	0.808923	0.216194	17.7477	28	14	Dihydropyrimidinase-related protein 2
UniRef90_P50213	-2.16168	-2.21412	1.41372	0.816209	17.7305	8	3	Isocitrate dehydrogenase [NAD] subunit alpha, mitochondrial
UniRef90_P46977	-2.2218	-2.2218	2.18317	1.54373	17.653	2	2	Dolichyl-diphosphooligosaccharide--protein glycosyltransferase subunit STT3A
UniRef90_Q9Z2I0	-2.27146	-2.26003	0.445404	0.257154	17.2712	6	3	LETM1 and EF-hand domain-containing protein 1, mitochondrial
UniRef90_O54755	-2.26376	-2.26376	1.29957	0.918932	17.2342	4	2	MIPP65
UniRef90_Q99J99	-2.27748	-2.27748	2.44873	1.73151	17.099	4	2	3-mercaptopyruvate sulfurtransferase
UniRef90_Q07020	-0.600454	-2.28688	2.94132	1.69817	17.0068	8	3	60S ribosomal protein L18
UniRef90_Q64727	-2.36318	-2.29263	0.554623	0.10126	16.9506	62	30	Vinculin
UniRef90_Q8TAC9	-2.26566	-2.30743	0.283614	0.163745	16.8067	4	3	Secretory carrier-associated membrane protein 5
UniRef90_P62851	-2.46675	-2.32481	0.400025	0.230955	16.6389	7	3	40S ribosomal protein S25
UniRef90_Q5RBL9	-2.86862	-2.32696	1.20326	0.601632	16.6183	6	4	Reticulon-3
UniRef90_O95865	-2.48013	-2.34483	0.46191	0.266684	16.4474	6	3	N(G),N(G)-dimethylarginine dimethylaminohydrolase 2
UniRef90_P40429	-2.47911	-2.35896	1.18151	0.528389	16.3132	10	5	60S ribosomal protein L13a
UniRef90_P51174	-2.2101	-2.37318	1.93136	0.965678	16.1791	9	4	Long-chain specific acyl-CoA dehydrogenase, mitochondrial
UniRef90_P35232	-2.42924	-2.38128	0.216722	0.0969212	16.1031	12	5	Prohibitin
UniRef90_P10252	-2.38888	-2.38888	0.61211	0.432827	16.032	4	2	CD48 antigen
UniRef90_P62081	-2.31154	-2.38957	0.259977	0.150098	16.0256	5	3	40S ribosomal protein S7
UniRef90_P55096	-2.39016	-2.39016	1.68971	1.19481	16.0202	2	2	ATP-binding cassette sub-family D member 3
UniRef90_P54577	-1.97206	-2.39232	1.3458	0.405773	16	12	11	Tyrosyl-tRNA synthetase, cytoplasmic
UniRef90_Q9Y2X7	-2.69996	-2.40054	0.77968	0.450149	15.9236	8	3	ARF GTPase-activating protein GIT1
UniRef90_P18124	-2.40966	-2.40599	0.563074	0.212822	15.873	10	7	60S ribosomal protein L7
UniRef90_P54819	-2.40697	-2.40697	1.21066	0.856067	15.864	3	2	Adenylate kinase 2, mitochondrial
UniRef90_Q99623	-2.41203	-2.41954	0.928032	0.535799	15.748	10	3	Prohibitin-2
UniRef90_Q9Y5X3	-2.47691	-2.44626	0.436465	0.251993	15.5039	6	3	Sorting nexin-5
UniRef90_Q9BT78	-2.47658	-2.47658	0.643611	0.455102	15.2305	5	2	COP9 signalosome complex subunit 4
UniRef90_P41219	-2.65219	-2.48926	2.11857	0.864901	15.1174	20	6	Peripherin
UniRef90_P24270	-2.407	-2.49366	0.983127	0.310892	15.0783	22	10	Catalase
UniRef90_Q9DB73	-2.57406	-2.49825	0.841112	0.280371	15.0376	10	9	NADH-cytochrome b5 reductase 1
UniRef90_Q6NZL0	-2.49955	-2.49955	0.554182	0.391866	15.0261	4	2	Uncharacterized protein C6orf174 homolog
UniRef90_Q9D0L7	-1.78164	-2.52607	1.40284	0.809931	14.7929	5	3	Armadillo repeat-containing protein 10
UniRef90_O75396	-2.55459	-2.55459	0.16824	0.118964	14.5454	8	2	Vesicle-trafficking protein SEC22b
UniRef90_Q9NZ01	-2.91792	-2.58496	0.739655	0.42704	14.2857	7	3	Trans-2,3-enoyl-CoA reductase
UniRef90_P19096	-2.05896	-2.59216	1.5786	0.344478	14.2248	47	21	Oleoyl-[acyl-carrier-protein] hydrolase
UniRef90_O60763	-2.73815	-2.60749	0.473603	0.193348	14.0956	7	6	General vesicular transport factor p115
UniRef90_P57759	-2.65686	-2.60881	0.588124	0.339554	14.0845	8	3	Endoplasmic reticulum resident protein 29
UniRef90_Q5XIC0	-2.8456	-2.60881	0.699028	0.403584	14.0845	4	3	Peroxisomal 3,2-trans-enoyl-CoA isomerase
UniRef90_Q15084	-2.34399	-2.62059	0.834808	0.481977	13.986	9	3	Protein disulfide-isomerase A6
UniRef90_Q04447	-2.56907	-2.63691	0.886337	0.511727	13.8504	6	3	Creatine kinase B-type
UniRef90_P52825	-2.65829	-2.65829	1.09555	0.774669	13.6746	3	2	Carnitine O-palmitoyltransferase 2, mitochondrial
UniRef90_P27797	-2.62258	-2.65988	0.310063	0.109624	13.6616	14	8	Calreticulin
UniRef90_P21912	-2.67141	-2.67141	0.266665	0.188561	13.5676	7	2	Succinate dehydrogenase [ubiquinone] iron-sulfur subunit, mitochondrial
UniRef90_P08249	-2.41564	-2.67582	1.70068	0.471684	13.5318	20	13	Malate dehydrogenase, mitochondrial
UniRef90_Q4G079	-2.97285	-2.67728	1.24445	0.622225	13.52	8	4	Small inducible cytokine subfamily E, member 1
UniRef90_P62424	-3.15944	-2.76535	1.26158	0.446037	12.822	11	8	60S ribosomal protein L7a
UniRef90_P62899	-2.7697	-2.7697	1.66192	1.17515	12.7883	6	2	60S ribosomal protein L31
UniRef90_P05091	-2.50176	-2.77189	0.52973	0.30584	12.7714	6	3	Aldehyde dehydrogenase, mitochondrial
UniRef90_P00367	-2.95455	-2.7761	0.430039	0.162539	12.7389	15	7	Glutamate dehydrogenase 1, mitochondrial
UniRef90_Q9H9B4	-2.77645	-2.77645	2.4619	1.74083	12.7362	5	2	Sideroflexin-1
UniRef90_P11047	-2.77742	-2.77742	0.850076	0.601094	12.7287	14	2	Laminin subunit gamma-1
UniRef90_P08574	-2.79035	-2.79035	0.460584	0.325682	12.6295	5	2	Cytochrome c1, heme protein, mitochondrial
UniRef90_O75390	-2.98022	-2.80218	0.393785	0.160762	12.5393	12	6	Citrate synthase, mitochondrial
UniRef90_Q9Y4L1	-2.73341	-2.83541	1.1884	0.594201	12.2888	8	4	Hypoxia up-regulated protein 1
UniRef90_Q80UE5	-2.80596	-2.88362	0.297164	0.171568	11.9332	6	3	Protein 4.1G
UniRef90_P04904	-3.07264	-2.89116	0.41535	0.146848	11.8783	11	8	Glutathione S-transferase alpha-3
UniRef90_P08003	-2.90476	-2.90476	0.343018	0.242551	11.7801	5	2	Protein disulfide-isomerase A4
UniRef90_P50544	-2.92436	-2.92436	0.263994	0.186672	11.6396	8	2	Very long-chain specific acyl-CoA dehydrogenase, mitochondrial
UniRef90_P11498	-3.18511	-2.9279	0.669298	0.386419	11.6144	15	3	Pyruvate carboxylase, mitochondrial
UniRef90_Q9BS26	-2.94803	-2.94803	0.778134	0.550224	11.4719	6	2	Endoplasmic reticulum resident protein ERp44
UniRef90_Q14103	-1.77955	-2.95791	2.60298	1.50283	11.4025	3	3	Heterogeneous nuclear ribonucleoprotein D0
UniRef90_P21796	-3.11067	-2.96162	1.08141	0.360471	11.3766	13	9	Voltage-dependent anion-selective channel protein 1
UniRef90_Q3KR86	-3.00239	-2.9695	0.491581	0.24579	11.3217	6	4	Inner membrane protein, mitochondrial
UniRef90_P08559	-2.99147	-2.99147	0.805028	0.569241	11.1696	9	2	Pyruvate dehydrogenase E1 component subunit alpha, somatic form, mitochondrial
UniRef90_Q96I99	-2.92245	-3.02326	1.31701	0.439004	10.9529	17	9	Succinyl-CoA ligase [GDP-forming] subunit beta, mitochondrial
UniRef90_P11532	-2.44923	-3.03738	1.1245	0.502891	10.8578	17	5	Dystrophin
UniRef90_O43301	-3.04282	-3.04282	1.18076	0.834926	10.8213	6	2	Heat shock 70 kDa protein 12A
UniRef90_Q96A33	-3.04436	-3.04436	0.101356	0.0716697	10.811	6	2	Coiled-coil domain-containing protein 47
UniRef90_P13804	-3.22613	-3.0469	0.427582	0.17456	10.7941	7	6	Electron transfer flavoprotein subunit alpha, mitochondrial
UniRef90_P16615	-3.05472	-3.05472	0.0270089	0.0190982	10.742	3	2	Sarcoplasmic/endoplasmic reticulum calcium ATPase 2
UniRef90_Q9CR68	-3.08144	-3.08144	0.321655	0.227445	10.5657	3	2	Cytochrome b-c1 complex subunit 11
UniRef90_P28331	-3.09321	-3.09321	0.794988	0.562141	10.4889	5	2	NADH-ubiquinone oxidoreductase 75 kDa subunit, mitochondrial
UniRef90_P62269	-3.10517	-3.10517	0.826076	0.584124	10.4112	16	2	40S ribosomal protein S18
UniRef90_P80404	-3.1249	-3.1177	1.45045	0.837416	10.3306	14	3	4-aminobutyrate aminotransferase, mitochondrial
UniRef90_P06576	-3.03126	-3.13422	0.579554	0.174742	10.2249	28	11	ATP synthase subunit beta, mitochondrial
UniRef90_P26641	-2.94755	-3.1811	1.04314	0.466508	9.93049	10	5	Elongation factor 1-gamma
UniRef90_P04181	-3.18599	-3.18599	0.232651	0.164509	9.90024	8	2	Ornithine aminotransferase, renal form
UniRef90_Q9Z2I9	-3.43478	-3.18903	1.0194	0.588551	9.88142	6	3	Succinyl-CoA ligase [ADP-forming] subunit beta, mitochondrial
UniRef90_P38117	-3.21742	-3.21742	0.502706	0.355467	9.70757	8	2	Electron transfer flavoprotein subunit beta
UniRef90_Q64057	-3.23019	-3.23019	0.119515	0.0845095	9.6303	2	2	Alpha-aminoadipic semialdehyde dehydrogenase (Fragment)
UniRef90_Q8BMK4	-3.43462	-3.24641	0.957735	0.552948	9.53289	7	3	Cytoskeleton-associated protein 4
UniRef90_Q9R0H0	-2.71199	-3.26374	1.78739	0.893697	9.42979	9	4	Peroxisomal acyl-coenzyme A oxidase 1
UniRef90_P45880	-3.26851	-3.26851	0.547079	0.386844	9.40159	4	2	Voltage-dependent anion-selective channel protein 2
UniRef90_Q99798	-3.3135	-3.3135	0.0523263	0.0370003	9.13932	12	2	Aconitate hydratase, mitochondrial
UniRef90_Q9WTP7	-3.19686	-3.31549	0.566013	0.200116	9.12783	13	8	GTP:AMP phosphotransferase mitochondrial
UniRef90_Q9DB77	-2.88053	-3.33628	1.46068	0.552085	9.00901	17	7	Cytochrome b-c1 complex subunit 2, mitochondrial
UniRef90_P35435	-3.92647	-3.36457	1.01673	0.587011	8.84956	5	3	ATP synthase subunit gamma, mitochondrial
UniRef90_P25705	-2.75427	-3.37851	1.83997	0.554773	8.77193	25	11	ATP synthase subunit alpha, mitochondrial
UniRef90_P00505	-3.42434	-3.40522	0.346937	0.141636	8.6249	18	6	Aspartate aminotransferase, mitochondrial
UniRef90_Q9R1J0	-2.30704	-3.40599	1.96131	1.13236	8.62069	5	3	Sterol-4-alpha-carboxylate 3-dehydrogenase, decarboxylating
UniRef90_O75323	-3.57892	-3.44528	0.442127	0.221064	8.40855	7	4	Protein NipSnap homolog 2
UniRef90_Q8QZT1	-3.48399	-3.48399	0.0911445	0.0644489	8.20423	6	2	Acetyl-CoA acetyltransferase, mitochondrial
UniRef90_O43175	-3.51722	-3.54844	0.760779	0.253593	7.87402	23	9	D-3-phosphoglycerate dehydrogenase
UniRef90_Q9BPW8	-2.95459	-3.56071	1.44901	0.648018	7.8125	6	5	Protein NipSnap homolog 1
UniRef90_Q921H8	-3.56193	-3.56193	0.802356	0.567352	7.80643	2	2	3-ketoacyl-CoA thiolase A, peroxisomal
UniRef90_Q9DB20	-3.59247	-3.60307	0.406474	0.203237	7.60367	13	4	ATP synthase subunit O, mitochondrial
UniRef90_Q8CAY6	-2.58573	-3.62059	1.98364	1.14526	7.5188	8	3	Acetyl-CoA acetyltransferase, cytosolic
UniRef90_Q99714	-3.70943	-3.70943	0.109126	0.0771641	7.10162	8	2	3-hydroxyacyl-CoA dehydrogenase type-2
UniRef90_P62906	-3.73284	-3.72742	0.913107	0.372774	7.01982	16	6	60S ribosomal protein L10a
UniRef90_P12235	-3.79908	-3.79908	0.749597	0.530045	6.70245	4	2	ADP/ATP translocase 1
UniRef90_P53007	-3.90721	-3.80735	0.281447	0.162494	6.66667	8	3	Tricarboxylate transport protein, mitochondrial
UniRef90_P14415	-3.23652	-3.83381	3.35928	1.67964	6.55347	7	4	Sodium/potassium-transporting ATPase subunit beta-2
UniRef90_O35409	-4.02485	-3.84786	0.649436	0.22961	6.49409	15	8	Glutamate carboxypeptidase 2
UniRef90_P10649	-3.76851	-3.848	0.516152	0.298001	6.49351	9	3	Glutathione S-transferase Mu 1
UniRef90_P23965	-3.87426	-3.87426	1.39821	0.988686	6.38384	6	2	3,2-trans-enoyl-CoA isomerase, mitochondrial
UniRef90_P30038	-3.88489	-3.88489	0.81253	0.574546	6.33997	8	2	Delta-1-pyrroline-5-carboxylate dehydrogenase, mitochondrial
UniRef90_P50993	-3.51418	-3.90689	1.45169	0.437701	6.25	23	11	Sodium/potassium-transporting ATPase subunit alpha-2
UniRef90_P13086	-4.08974	-3.91073	0.837553	0.418777	6.23443	8	4	Succinyl-CoA ligase [GDP-forming] subunit alpha, mitochondrial
UniRef90_P56571	-3.9459	-3.9459	1.05922	0.748979	6.09342	5	2	ES1 protein homolog, mitochondrial
UniRef90_P09972	-3.89155	-3.9905	0.286785	0.143393	5.91892	12	4	Fructose-bisphosphate aldolase C
UniRef90_B4DMA0	-4.05337	-4.05337	0.153463	0.108515	5.68085	3	2	cDNA FLJ56008, highly similar to Aldehyde dehydrogenase family 7 member A1 (EC 1.2.1.3)
UniRef90_P54869	-3.28536	-4.22497	2.15161	1.24223	5.07614	13	3	Hydroxymethylglutaryl-CoA synthase, mitochondrial
UniRef90_Q02252	-4.15263	-4.40599	0.839678	0.375515	4.5045	16	5	Methylmalonate-semialdehyde dehydrogenase [acylating], mitochondrial
UniRef90_P48735	-4.52108	-4.62059	1.19193	0.397309	3.90625	20	9	Isocitrate dehydrogenase [NADP], mitochondrial
UniRef90_Q8BJ64	-4.08786	-4.71699	2.32701	1.3435	3.663	10	3	Choline dehydrogenase, mitochondrial
UniRef90_Q8BWT1	-3.99709	-4.77083	2.48607	0.828691	3.53357	18	9	3-ketoacyl-CoA thiolase, mitochondrial
UniRef90_Q16836	-3.98516	-4.848	1.93865	0.732742	3.3557	14	7	Hydroxyacyl-coenzyme A dehydrogenase, mitochondrial
UniRef90_Q8K442	-4.38971	-4.97728	1.98479	0.887626	3.07692	12	5	ATP-binding cassette sub-family A member 8-A
UniRef90_P02768	-4.40582	-5.00899	2.53657	0.958732	3.01205	17	7	Serum albumin
UniRef90_Q8BH95	-4.8613	-5.08646	0.67673	0.338365	2.85907	12	4	Enoyl-CoA hydratase, mitochondrial

## Sheet: injury 30h
UniRef90	Mean	Median	Std Dev	Std Err	Incorporation (%)	N (all peptides)	N (quanti peptides)	Clustner Name
UniRef90_Q794F9	3.43388	4.28896	3.46012	1.73006	95.1334	7	4	4F2 cell-surface antigen heavy chain
UniRef90_P15379	4.18785	3.64566	1.12417	0.649042	92.6012	7	3	CD44 antigen
UniRef90_P70232	3.32968	3.48605	0.748008	0.374004	91.8066	6	4	Processed neural cell adhesion molecule L1-like protein
UniRef90_Q00238	3.4851	3.4851	0.718415	0.507996	91.8016	2	2	Intercellular adhesion molecule 1
UniRef90_P42892	1.88692	3.41889	2.87795	1.66159	91.4495	6	3	Endothelin-converting enzyme 1
UniRef90_Q63663	3.45534	3.28632	0.473957	0.236978	90.703	16	4	Interferon-induced guanylate-binding protein 2
UniRef90_Q0VBD0	2.67333	3.12029	0.880302	0.393683	89.6861	11	5	Integrin beta
UniRef90_P08226	2.17309	2.9771	1.79842	0.804276	88.7311	17	5	Apolipoprotein E
UniRef90_Q7TPJ1	2.92463	2.92463	0.224174	0.158515	88.3623	7	2	Ac2-233
UniRef90_P06837	2.72096	2.76611	0.259134	0.149611	87.184	10	3	Neuromodulin
UniRef90_P21263	2.54788	2.662	1.11407	0.2323	86.3558	62	23	Nestin
UniRef90_P11627	2.08963	2.45799	1.51094	0.872342	84.6024	10	3	Neural cell adhesion molecule L1
UniRef90_P62136	2.34704	2.34704	2.74852	1.9435	83.5737	2	2	Serine/threonine-protein phosphatase PP1-alpha catalytic subunit
UniRef90_P14873	2.31765	2.30757	0.840089	0.253296	83.1947	18	11	MAP1 light chain LC1
UniRef90_Q99LJ0	2.43467	2.3041	0.494468	0.247234	83.161	8	4	CTTNBP2 N-terminal-like protein
UniRef90_Q969T9	2.29617	2.29617	0.979105	0.692332	83.0839	3	2	WW domain-binding protein 2
UniRef90_Q62884	2.11723	2.11723	1.24842	0.882767	81.2685	4	2	Vascular protein tyrosine phosphatase 1
UniRef90_Q6ZPS0	1.39377	2.11404	1.29182	0.745835	81.2348	6	3	MKIAA1398 protein (Fragment)
UniRef90_Q5VZY9	0.82559	2.05289	2.81529	1.25904	80.5802	15	5	Doublecortin and CaM kinase-like 1
UniRef90_P18589	1.53412	2.0459	2.30136	1.15068	80.5042	11	4	Interferon-induced GTP-binding protein Mx2
UniRef90_P28658	2.19617	1.92139	0.76337	0.440732	79.1139	4	3	Ataxin-10
UniRef90_Q9QYR6	1.27401	1.71786	1.4803	0.66201	76.6871	8	5	MAP1 light chain LC2
UniRef90_Q66H32	1.64386	1.64386	0.958938	0.678072	75.7576	2	2	RAN GTPase activating protein 1
UniRef90_Q13492	1.44353	1.5649	0.641106	0.242315	74.7384	10	7	Phosphatidylinositol-binding clathrin assembly protein
UniRef90_Q9Y696	1.54786	1.54793	0.20142	0.0761295	74.5156	13	7	Chloride intracellular channel protein 4
UniRef90_Q8R2Y2	1.65591	1.53952	0.605314	0.182509	74.4048	20	11	Cell surface glycoprotein MUC18
UniRef90_P70271	1.78058	1.51457	0.723537	0.417734	74.0741	10	3	PDZ and LIM domain protein 4
UniRef90_Q10728	1.41811	1.50597	0.352142	0.176071	73.9594	7	4	Protein phosphatase 1 regulatory subunit 12A
UniRef90_Q63560	1.49262	1.47393	0.382014	0.220556	73.5294	10	3	Microtubule-associated protein 6
UniRef90_P14562	1.42738	1.42738	0.8931	0.631517	72.8966	4	2	Lysosome-associated membrane glycoprotein 1
UniRef90_Q8R1F1	1.42552	1.40736	0.724008	0.418006	72.6216	5	3	Niban-like protein 1
UniRef90_P42703	1.33936	1.33936	0.747261	0.528393	71.6745	3	2	Leukemia inhibitory factor receptor
UniRef90_Q924W2	0.223951	1.33643	2.56687	1.48198	71.6332	9	3	Integrin alpha 6 subchain (Fragment)
UniRef90_P61266	1.32607	1.32607	0.424073	0.299865	71.4871	3	2	Syntaxin-1B
UniRef90_O00571	1.30365	1.30365	0.135884	0.0960846	71.1692	7	2	ATP-dependent RNA helicase DDX3X
UniRef90_Q92882	1.29471	1.29471	1.76042	1.24481	71.042	3	2	Osteoclast-stimulating factor 1
UniRef90_P01830	1.30592	1.28279	0.26535	0.1532	70.8717	5	3	Thy-1 membrane glycoprotein
UniRef90_P08699	1.29781	1.2051	0.287223	0.143611	69.7476	6	4	Galectin-3
UniRef90_P10960	1.87831	1.19074	1.88442	0.94221	69.5373	7	4	Sulfated glycoprotein 1
UniRef90_Q99P72	0.934114	1.12186	0.713595	0.205997	68.5166	19	12	Reticulon-4
UniRef90_O08532-5	0.996327	1.1016	0.311231	0.179689	68.2128	8	3	Isoform 2E of Voltage-dependent calcium channel subunit alpha-2/delta-1
UniRef90_Q865V6	1.07716	1.04832	0.297666	0.148833	67.4068	9	4	Macrophage-capping protein
UniRef90_Q91VI7	1.02141	1.02141	0.0786704	0.0556284	66.9957	5	2	Ribonuclease inhibitor
UniRef90_Q07076	0.987449	0.987449	0.0465159	0.0328917	66.4731	12	2	Annexin A7
UniRef90_P35221	0.974289	0.985645	0.846422	0.218545	66.4452	21	15	Catenin alpha-1
UniRef90_O00151	1.00689	0.983366	0.984156	0.492078	66.41	8	4	PDZ and LIM domain protein 1
UniRef90_O88447	0.700238	0.9771	0.646955	0.289327	66.313	7	5	Kinesin light chain 1
UniRef90_O00499-10	0.593172	0.971431	0.677531	0.391173	66.2252	4	3	Isoform BIN1-13 of Myc box-dependent-interacting protein 1
UniRef90_Q8WUM4	0.618611	0.968605	1.04955	0.34985	66.1813	17	9	Programmed cell death 6-interacting protein
UniRef90_P08107	0.995519	0.962969	0.118198	0.0682415	66.0939	3	3	Heat shock 70 kDa protein 1A/1B
UniRef90_P07825	0.950709	0.950709	0.161515	0.114208	65.9032	6	2	Synaptophysin
UniRef90_Q8NFZ8	1.13409	0.948976	0.409853	0.236628	65.8762	11	3	Cell adhesion molecule 4
UniRef90_Q96SB3	0.92498	0.92498	1.20347	0.85098	65.5013	4	2	Neurabin-2
UniRef90_Q60780	0.959429	0.91866	0.579214	0.218922	65.4022	13	7	Growth arrest-specific protein 7
UniRef90_P31689	0.910436	0.910436	0.0862603	0.0609953	65.2731	6	2	DnaJ homolog subfamily A member 1
UniRef90_Q14118	1.49501	0.878321	1.83584	1.05992	64.7668	5	3	Beta-dystroglycan
UniRef90_P26038	0.865221	0.869985	0.452123	0.15985	64.6349	15	8	Moesin
UniRef90_P61586	0.865143	0.865143	0.174459	0.123361	64.5581	5	2	Transforming protein RhoA
UniRef90_Q8VI36-2	0.800224	0.841663	0.299693	0.173028	64.1849	5	3	Isoform Alpha of Paxillin
UniRef90_B1VKB4	0.828154	0.828154	0.584235	0.413116	63.9693	2	2	Synaptopodin
UniRef90_Q8R3D1	0.805327	0.805327	2.30386	1.62908	63.6038	2	2	TBC1 domain family member 13
UniRef90_Q62465	0.571544	0.798366	1.1438	0.317233	63.4921	23	13	Synaptic vesicle membrane protein VAT-1 homolog
UniRef90_Q5QD51	0.824775	0.780909	0.354627	0.106924	63.2111	19	11	A-kinase anchor protein 12
UniRef90_P19137	1.11811	0.778432	1.12454	0.649251	63.1712	9	3	Laminin subunit alpha-1
UniRef90_P10107	0.491909	0.757592	0.657138	0.328569	62.8345	8	4	Annexin A1
UniRef90_Q63258	0.467102	0.691989	0.541457	0.31261	61.7665	7	3	Integrin alpha-7 light chain
UniRef90_Q8VDN4	0.662504	0.662504	0.170959	0.120886	61.2827	4	2	Coiled-coil domain-containing protein 92
UniRef90_Q7L1Q6	0.5889	0.662004	1.44903	0.836601	61.2745	4	3	Basic leucine zipper and W2 domain-containing protein 1
UniRef90_Q63610	0.687887	0.657445	0.327102	0.188853	61.1995	8	3	Tropomyosin alpha-3 chain
UniRef90_B7ZLX0	-0.134509	0.638966	2.02489	0.826658	60.8949	13	6	ITGAV protein
UniRef90_A8USN8	0.899365	0.63139	0.576878	0.288439	60.7698	5	4	Chloride intracellular channel 1
UniRef90_O00410	1.16316	0.614706	1.11037	0.453307	60.4938	14	6	Importin-5
UniRef90_Q8VCH8	0.588085	0.588085	0.311626	0.220353	60.0519	2	2	UBX domain-containing protein 4
UniRef90_Q5R1W9	0.563921	0.586464	0.534642	0.154338	60.025	18	12	L-lactate dehydrogenase A chain
UniRef90_P62988	0.582416	0.575615	0.870175	0.389154	59.8444	8	5	Ubiquitin
UniRef90_Q38PG2	0.670114	0.554273	0.245192	0.141562	59.4884	3	3	AHNAK 1 (Fragment)
UniRef90_Q92783	0.193489	0.54372	1.06948	0.617465	59.312	3	3	Signal transducing adapter molecule 1
UniRef90_Q80TS3	0.83559	0.524915	0.829858	0.479119	58.9971	4	3	Latrophilin-3
UniRef90_A0PJF4	0.514111	0.514111	0.164449	0.116283	58.8158	2	2	Ahnak protein (Fragment)
UniRef90_P20020	0.491304	0.491304	0.267397	0.189078	58.4323	5	2	Plasma membrane calcium-transporting ATPase 1
UniRef90_P30999	0.489635	0.489635	0.058719	0.0415206	58.4042	18	2	Catenin delta-1
UniRef90_P27214	0.511175	0.477944	0.155282	0.0896524	58.2072	7	3	Annexin A11
UniRef90_O09044	0.468787	0.468787	0.838792	0.593115	58.0527	3	2	Synaptosomal-associated protein 23
UniRef90_P13693	0.868631	0.450084	1.08017	0.483067	57.7367	5	5	Translationally-controlled tumor protein
UniRef90_Q9UNF0	0.415266	0.428566	0.451407	0.26062	57.3723	6	3	Protein kinase C and casein kinase substrate in neurons protein 2
UniRef90_P34022	0.403852	0.403852	1.24301	0.878937	56.9529	2	2	Ran-specific GTPase-activating protein
UniRef90_Q38PF9	0.448861	0.37707	0.309908	0.178926	56.4972	3	3	AHNAK 1 (Fragment)
UniRef90_P16330	0.439667	0.374313	0.264365	0.0623114	56.4502	24	18	2&apos;,3&apos;-cyclic-nucleotide 3&apos;-phosphodiesterase
UniRef90_O70419	0.359154	0.359154	0.324449	0.22942	56.1917	6	2	Cortactin isoform C
UniRef90_P37837	0.139666	0.352916	0.500054	0.166685	56.0852	11	9	Transaldolase
UniRef90_P55036	0.438539	0.33825	0.242864	0.140217	55.8347	4	3	26S proteasome non-ATPase regulatory subunit 4
UniRef90_Q6UL10	0.26506	0.330991	0.355887	0.14529	55.7106	6	6	AHNAK (Fragment)
UniRef90_Q91XV3	0.324317	0.324317	0.117446	0.0830466	55.5964	3	2	Brain acid soluble protein 1
UniRef90_Q02750	0.3819	0.320126	0.330938	0.191067	55.5247	4	3	Dual specificity mitogen-activated protein kinase kinase 1
UniRef90_B7Z5S6	0.317756	0.317756	0.132143	0.0934391	55.4841	3	2	cDNA FLJ51057, highly similar to Homo sapiens fibronectin type III and SPRY domain containing 1-like, transcript variant 1, mRNA
UniRef90_Q8NC51	0.299563	0.299563	0.00376667	0.00266344	55.1725	4	2	Plasminogen activator inhibitor 1 RNA-binding protein
UniRef90_Q62418	0.291688	0.291688	1.12795	0.797579	55.0374	7	2	Drebrin-like protein
UniRef90_P67809	0.167861	0.289827	0.349719	0.20191	55.0055	5	3	Nuclease-sensitive element-binding protein 1
UniRef90_O60282	0.259992	0.259992	1.53264	1.08374	54.4932	3	2	Kinesin heavy chain isoform 5C
UniRef90_Q9Y371	0.130638	0.242154	0.770103	0.385052	54.1864	6	4	Endophilin-B1
UniRef90_P20340	0.21646	0.21646	0.283553	0.200502	53.7439	2	2	Ras-related protein Rab-6A
UniRef90_P05556	0.187905	0.200913	0.14398	0.0371753	53.4759	22	15	Integrin beta-1
UniRef90_P55010	0.196072	0.196072	0.208823	0.14766	53.3925	2	2	Eukaryotic translation initiation factor 5
UniRef90_P19157	0.11001	0.166503	0.107853	0.0622692	52.8821	10	3	Glutathione S-transferase P 1
UniRef90_P08238	0.192288	0.158632	0.180779	0.0483151	52.7461	26	14	Heat shock protein HSP 90-beta
UniRef90_Q92597	0.191733	0.15773	0.711528	0.29048	52.7305	14	6	Protein NDRG1
UniRef90_P09671	0.117439	0.150401	0.154829	0.0692414	52.6039	8	5	Superoxide dismutase [Mn], mitochondrial
UniRef90_P04075	0.152174	0.110929	0.317085	0.0709024	51.9213	35	20	Fructose-bisphosphate aldolase A
UniRef90_Q38PG3	0.0522787	0.101898	0.690421	0.244101	51.765	8	8	AHNAK 1 (Fragment)
UniRef90_P61764	0.0938207	0.0938207	1.11697	0.789815	51.6252	5	2	Syntaxin-binding protein 1
UniRef90_P07355	0.124241	0.0931113	0.590918	0.107886	51.6129	48	30	Annexin A2
UniRef90_P25189	0.0909877	0.0686144	0.549546	0.194294	51.1888	15	8	Myelin protein P0
UniRef90_O35685	-0.140292	0.06112	0.586393	0.293196	51.059	5	4	Nuclear migration protein nudC
UniRef90_P54920	-0.0135823	0.0484122	0.282497	0.1631	50.8388	8	3	Alpha-soluble NSF attachment protein
UniRef90_Q00169	0.0470011	0.0470011	0.404165	0.285788	50.8144	4	2	Phosphatidylinositol transfer protein alpha isoform
UniRef90_P33176	-0.481518	0.046921	1.59093	0.601314	50.813	18	7	Kinesin-1 heavy chain
UniRef90_P52306	-0.0132085	0.0226041	0.333577	0.166789	50.3917	10	4	Rap1 GTPase-GDP dissociation stimulator 1
UniRef90_Q9UNZ2	0.202734	0.0134258	0.574244	0.287122	50.2327	13	4	NSFL1 cofactor p47
UniRef90_Q60737	-0.218866	0.00144342	0.567925	0.327892	50.025	3	3	Casein kinase II subunit alpha
UniRef90_P27321	-0.0088327	-0.0088327	0.200432	0.141727	49.8469	3	2	Calpastatin
UniRef90_Q7TP42	-0.0105551	-0.0105551	0.234431	0.165768	49.8171	3	2	Ab2-292
UniRef90_P58871	-0.0462661	-0.0462661	1.30756	0.924588	49.1983	5	2	182 kDa tankyrase-1-binding protein
UniRef90_P43034	0.52849	-0.0565835	1.19663	0.690874	49.0196	5	3	Platelet-activating factor acetylhydrolase IB subunit alpha
UniRef90_Q15417	-0.157181	-0.0565835	0.522492	0.144913	49.0196	25	13	Calponin-3
UniRef90_Q8CI51	-0.0579161	-0.0579161	0.290081	0.205118	48.9965	4	2	PDZ and LIM domain protein 5
UniRef90_P51149	-0.0653337	-0.0653337	0.262517	0.185628	48.868	5	2	Ras-related protein Rab-7a
UniRef90_Q9ESN0	-0.118907	-0.0840643	0.162753	0.0363926	48.5437	32	20	Protein Niban
UniRef90_Q8CBW3	-0.0904558	-0.0904558	0.0479027	0.0338723	48.433	2	2	Abl interactor 1
UniRef90_P97372	-0.0986811	-0.0986811	0.180775	0.127827	48.2907	3	2	Proteasome activator complex subunit 2
UniRef90_P45376	-0.105319	-0.105319	1.45973	1.03218	48.1758	3	2	Aldose reductase
UniRef90_Q9Y570	-0.118708	-0.118708	0.335784	0.237435	47.9441	5	2	Protein phosphatase methylesterase 1
UniRef90_P21283	-0.121832	-0.123781	0.149546	0.0747729	47.8563	5	4	V-type proton ATPase subunit C 1
UniRef90_Q8VDQ8	-0.078054	-0.127539	0.215509	0.107755	47.7914	6	4	NAD-dependent deacetylase sirtuin-2
UniRef90_Q13177	0.0494702	-0.129109	0.881788	0.278846	47.7642	13	10	PAK-2p34
UniRef90_P35579	0.153518	-0.129712	1.00936	0.412071	47.7538	14	6	Myosin-9
UniRef90_P12081	-0.163269	-0.163269	1.45065	1.02577	47.1738	3	2	Histidyl-tRNA synthetase, cytoplasmic
UniRef90_Q61490	-0.160542	-0.176097	0.128454	0.0642269	46.9523	9	4	CD166 antigen
UniRef90_O75381	0.165882	-0.176323	1.73543	1.00195	46.9484	3	3	Peroxisomal membrane protein PEX14
UniRef90_P13639	-0.121834	-0.182342	0.216413	0.0883502	46.8444	11	6	Elongation factor 2
UniRef90_P30153	-0.235154	-0.182342	0.179313	0.0732044	46.8444	19	6	Serine/threonine-protein phosphatase 2A 65 kDa regulatory subunit A alpha isoform
UniRef90_O60506	-0.18382	-0.18382	1.89823	1.34225	46.8189	6	2	Heterogeneous nuclear ribonucleoprotein Q
UniRef90_P49006	-0.32721	-0.185311	1.42058	0.710288	46.7932	4	4	MARCKS-related protein
UniRef90_A2RU21	-0.0400118	-0.201634	0.345434	0.199437	46.5116	4	3	CLASP1 protein
UniRef90_P54578	-0.0803681	-0.201634	0.264955	0.100144	46.5116	13	7	Ubiquitin carboxyl-terminal hydrolase 14
UniRef90_Q15907	-0.150755	-0.201634	0.292832	0.0976107	46.5116	18	9	Ras-related protein Rab-11B
UniRef90_Q92598	-0.186114	-0.201634	0.200609	0.115822	46.5116	5	3	Heat shock protein 105 kDa
UniRef90_Q9R111	0.406264	-0.201634	1.2489	0.624448	46.5116	8	4	Guanine deaminase
UniRef90_P26453	-0.166328	-0.204465	0.985525	0.492762	46.4628	7	4	Basigin
UniRef90_Q9UQ80	-0.204845	-0.204845	0.132672	0.0938135	46.4563	4	2	Proliferation-associated protein 2G4
UniRef90_P26645	-0.0907527	-0.214125	0.712404	0.214798	46.2963	13	11	Myristoylated alanine-rich C-kinase substrate
UniRef90_Q6TXE9	-0.219998	-0.219998	0.270721	0.191429	46.1951	6	2	LRRGT00050
UniRef90_P38606	-0.408911	-0.226509	0.675657	0.390091	46.0829	7	3	V-type proton ATPase catalytic subunit A
UniRef90_Q9H115	-0.234631	-0.226509	0.427703	0.191274	46.0829	7	5	Beta-soluble NSF attachment protein
UniRef90_Q15365	-0.244771	-0.244771	0.0258277	0.0182629	45.7686	4	2	Poly(rC)-binding protein 1
UniRef90_O60884	-0.292202	-0.250962	0.166147	0.0959249	45.6621	4	3	DnaJ homolog subfamily A member 2
UniRef90_O75083	-0.367653	-0.250962	0.510111	0.294512	45.6621	6	3	WD repeat-containing protein 1
UniRef90_P27635	0.344224	-0.250962	1.10308	0.636861	45.6621	7	3	60S ribosomal protein L10
UniRef90_Q6DGF2	-0.773302	-0.250962	0.992941	0.573275	45.6621	4	3	Enthoprotin
UniRef90_P57759	-0.173429	-0.263034	0.607534	0.35076	45.4545	6	3	Endoplasmic reticulum resident protein 29
UniRef90_P36543	-0.26723	-0.26723	0.337517	0.238661	45.3825	6	2	V-type proton ATPase subunit E 1
UniRef90_Q15691	-0.286123	-0.27481	0.291174	0.118871	45.2523	8	6	Microtubule-associated protein RP/EB family member 1
UniRef90_O15371	-0.309203	-0.275007	0.0698543	0.0403304	45.2489	6	3	Eukaryotic translation initiation factor 3 subunit D
UniRef90_P68104	-0.143643	-0.275007	0.5062	0.140395	45.2489	16	13	Elongation factor 1-alpha 1
UniRef90_P51148	-0.235473	-0.286881	0.120672	0.0696698	45.045	5	3	Ras-related protein Rab-5C
UniRef90_P62191	-0.135328	-0.286881	0.425847	0.245863	45.045	5	3	26S protease regulatory subunit 4
UniRef90_Q9UDT6	-0.281812	-0.292674	0.276199	0.0873419	44.9457	17	10	CAP-Gly domain-containing linker protein 2
UniRef90_Q9JI55	-0.382092	-0.29277	0.739668	0.157698	44.944	63	22	Plectin-1 (Fragment)
UniRef90_P53990	-0.453539	-0.298658	0.439528	0.166126	44.843	10	7	IST1 homolog
UniRef90_Q13765	-0.12463	-0.309918	0.457193	0.228597	44.6501	5	4	Nascent polypeptide-associated complex subunit alpha
UniRef90_O00231	-0.476591	-0.31034	0.510757	0.170252	44.6429	13	9	26S proteasome non-ATPase regulatory subunit 11
UniRef90_O54901	0.252768	-0.318967	1.32207	0.661034	44.4951	5	4	OX-2 membrane glycoprotein
UniRef90_P21333	-0.487537	-0.321928	0.622561	0.142825	44.4444	40	19	Filamin-A
UniRef90_Q9Y6G9	-0.402077	-0.321928	1.02339	0.457674	44.4444	6	5	Cytoplasmic dynein 1 light intermediate chain 1
UniRef90_P09936	-0.337447	-0.325107	0.455444	0.185934	44.3901	10	6	Ubiquitin carboxyl-terminal hydrolase isozyme L1
UniRef90_Q5FVI3	-0.32575	-0.32575	1.44921	1.02475	44.379	2	2	Leucine-rich repeat-containing protein 57
UniRef90_Q8NBU5	-0.415945	-0.333424	0.16333	0.0942989	44.2478	5	3	ATPase family AAA domain-containing protein 1
UniRef90_Q99747	-0.486827	-0.356144	0.256552	0.148121	43.8596	3	3	Gamma-soluble NSF attachment protein
UniRef90_P52565	-0.318662	-0.367371	0.312079	0.139566	43.6681	8	5	Rho GDP-dissociation inhibitor 1
UniRef90_O43707	-0.283174	-0.378512	0.568917	0.0961646	43.4783	60	35	Alpha-actinin-4
UniRef90_Q01082	-0.227536	-0.378512	0.760818	0.158641	43.4783	54	23	Spectrin beta chain, brain 1
UniRef90_P27595	-0.384209	-0.384209	0.50295	0.355639	43.3812	13	2	Hexokinase-1
UniRef90_P10096	-0.495358	-0.389188	0.391688	0.0923217	43.2965	23	18	Glyceraldehyde-3-phosphate dehydrogenase
UniRef90_Q13885	-0.361854	-0.389567	0.0882873	0.0509727	43.29	4	3	Tubulin beta-2A chain
UniRef90_Q9HB71	-0.473167	-0.389567	0.553294	0.319444	43.29	3	3	Calcyclin-binding protein
UniRef90_P17980	-0.393035	-0.393035	1.3218	0.934653	43.231	3	2	26S protease regulatory subunit 6A
UniRef90_P61981	-0.400372	-0.400372	0.0309157	0.0218607	43.1063	2	2	14-3-3 protein gamma, N-terminally processed
UniRef90_P06733	-0.370345	-0.400538	0.0735887	0.0329098	43.1034	6	5	Alpha-enolase
UniRef90_P14602	-0.3942	-0.400538	0.176732	0.0790368	43.1034	12	5	Heat shock protein beta-1
UniRef90_Q14203	-0.354965	-0.400538	0.849514	0.283171	43.1034	23	9	Dynactin subunit 1
UniRef90_Q9H223	-0.308889	-0.409957	0.655679	0.26768	42.9434	11	6	EH domain-containing protein 4
UniRef90_P14550	-0.413337	-0.411059	0.0554164	0.0277082	42.9247	8	4	Alcohol dehydrogenase [NADP+]
UniRef90_Q96CW1	-0.586666	-0.411426	0.596311	0.34428	42.9185	4	3	AP-2 complex subunit mu
UniRef90_Q9JLQ0	-0.391584	-0.411426	0.084765	0.0489391	42.9185	6	3	CD2-associated protein
UniRef90_P34897	-0.51511	-0.422233	0.579255	0.259051	42.735	9	5	Serine hydroxymethyltransferase, mitochondrial
UniRef90_Q62736	-0.364982	-0.422233	0.490019	0.112418	42.735	24	19	Non-muscle caldesmon
UniRef90_P00492	-0.356283	-0.432959	0.452055	0.202165	42.5532	6	5	Hypoxanthine-guanine phosphoribosyltransferase
UniRef90_P10605	0.206665	-0.432959	1.43665	0.82945	42.5532	10	3	Cathepsin B heavy chain
UniRef90_P53367	-0.613782	-0.432959	0.562914	0.324999	42.5532	4	3	Arfaptin-1
UniRef90_P54577	-0.6572	-0.437497	0.869387	0.307375	42.4763	15	8	Tyrosyl-tRNA synthetase, cytoplasmic
UniRef90_P62333	-0.412573	-0.443256	0.383013	0.121119	42.3788	21	10	26S protease regulatory subunit S10B
UniRef90_P32921	-0.548434	-0.443607	0.315532	0.182172	42.3729	4	3	T2-TrpRS
UniRef90_Q9BTV4	-0.62363	-0.443607	0.488241	0.281886	42.3729	8	3	Transmembrane protein 43
UniRef90_Q9NP79	-0.29741	-0.448659	0.406204	0.203102	42.2874	5	4	Vacuolar protein sorting-associated protein VTA1 homolog
UniRef90_Q14974	-0.444837	-0.454176	0.160256	0.0716688	42.1941	14	5	Importin subunit beta-1
UniRef90_P62879	-0.461594	-0.461594	0.133251	0.0942225	42.0687	5	2	Guanine nucleotide-binding protein G(I)/G(S)/G(T) subunit beta-2
UniRef90_Q5M7W5	-0.514435	-0.46463	0.79949	0.170452	42.0174	31	22	Microtubule-associated protein 4
UniRef90_P00558	-0.352702	-0.475085	0.763772	0.146988	41.841	37	27	Phosphoglycerate kinase 1
UniRef90_Q9JM96	-0.522967	-0.485096	0.174594	0.0872972	41.6722	4	4	Cdc42 effector protein 4
UniRef90_Q9D0L7	-0.48711	-0.48711	1.36764	0.967065	41.6383	3	2	Armadillo repeat-containing protein 10
UniRef90_P40240	-0.457708	-0.495114	0.130601	0.0653007	41.5035	7	4	CD9 antigen
UniRef90_O76031	-0.504168	-0.504168	0.867658	0.613527	41.3513	5	2	ATP-dependent Clp protease ATP-binding subunit clpX-like, mitochondrial
UniRef90_P04899	-0.484086	-0.516015	0.801388	0.462682	41.1523	9	3	Guanine nucleotide-binding protein G(i) subunit alpha-2
UniRef90_Q13561	-0.581282	-0.517882	0.320257	0.160128	41.1209	10	4	Dynactin subunit 2
UniRef90_Q63377	-0.523071	-0.523071	0.402038	0.284284	41.0339	4	2	Sodium/potassium-transporting ATPase subunit beta-3
UniRef90_Q96AC1	-0.445583	-0.526069	1.23354	0.712187	40.9836	6	3	Fermitin family homolog 2
UniRef90_P50454	-0.305578	-0.530508	0.584339	0.168684	40.9092	27	12	Serpin H1
UniRef90_P51665	-0.530992	-0.530992	0.0211801	0.0149766	40.9011	3	2	26S proteasome non-ATPase regulatory subunit 7
UniRef90_P50502	-0.565564	-0.565564	0.0137859	0.00974809	40.3231	4	2	Hsc70-interacting protein
UniRef90_P11233	-0.66174	-0.575312	0.175723	0.101454	40.1606	3	3	Ras-related protein Ral-A
UniRef90_P13796	-0.675083	-0.579492	0.30601	0.124928	40.091	9	6	Plastin-2
UniRef90_P61758	-0.581749	-0.581749	0.136221	0.0963225	40.0535	3	2	Prefoldin subunit 3
UniRef90_Q9UPY8	-0.586884	-0.586884	0.12896	0.0911884	39.968	5	2	Microtubule-associated protein RP/EB family member 3
UniRef90_O00232	-0.597359	-0.597359	0.745247	0.526969	39.794	2	2	26S proteasome non-ATPase regulatory subunit 12
UniRef90_P55072	-0.66771	-0.62293	0.391343	0.108539	39.3701	24	13	Transitional endoplasmic reticulum ATPase
UniRef90_Q9UNM6	-0.525336	-0.62293	0.218538	0.126173	39.3701	5	3	26S proteasome non-ATPase regulatory subunit 13
UniRef90_P78371	-0.875636	-0.631878	0.784118	0.392059	39.2221	5	4	T-complex protein 1 subunit beta
UniRef90_P49368	-0.811697	-0.632268	1.25497	0.324032	39.2157	25	15	T-complex protein 1 subunit gamma
UniRef90_Q9NR31	-0.494889	-0.632268	0.254135	0.146725	39.2157	4	3	GTP-binding protein SAR1a
UniRef90_P46778	-0.646685	-0.646685	0.647217	0.457651	38.9777	6	2	60S ribosomal protein L21
UniRef90_O88531	-0.647803	-0.647803	3.1172	2.2042	38.9593	5	2	Palmitoyl-protein thioesterase 1
UniRef90_P61978	-0.812882	-0.655025	0.581917	0.237567	38.8403	12	6	Heterogeneous nuclear ribonucleoprotein K
UniRef90_P50991	-0.633576	-0.655286	0.148636	0.0743179	38.836	9	4	T-complex protein 1 subunit delta
UniRef90_P61158	-0.448114	-0.659664	0.637631	0.260312	38.764	10	6	Actin-related protein 3
UniRef90_P50990	-0.669924	-0.659925	0.945051	0.284944	38.7597	17	11	T-complex protein 1 subunit theta
UniRef90_Q8K0T0	-0.661714	-0.661714	0.416264	0.294343	38.7303	5	2	Reticulon-1
UniRef90_P42025	-0.959845	-0.678072	0.549377	0.245689	38.4615	9	5	Beta-centractin
UniRef90_Q9Y3A3	-0.678973	-0.678973	0.216239	0.152904	38.4468	3	2	Mps one binder kinase activator-like 3
UniRef90_P62714	-0.686476	-0.686476	2.99938	2.12088	38.3238	4	2	Serine/threonine-protein phosphatase 2A catalytic subunit beta isoform
UniRef90_P38646	-0.761647	-0.687061	0.363876	0.100921	38.3142	23	13	Stress-70 protein, mitochondrial
UniRef90_P08670	-0.772237	-0.691527	0.209871	0.0340456	38.241	98	38	Vimentin
UniRef90_P46940	-0.649804	-0.704872	0.885012	0.266841	38.0228	15	11	Ras GTPase-activating-like protein IQGAP1
UniRef90_P18669	-0.749637	-0.713696	0.110565	0.0417895	37.8788	13	7	Phosphoglycerate mutase 1
UniRef90_O14908	-0.73045	-0.73045	0.820089	0.57989	37.6059	6	2	PDZ domain-containing protein GIPC1
UniRef90_P54714	-0.818874	-0.735464	0.286615	0.0906356	37.5244	16	10	Triosephosphate isomerase
UniRef90_P25786	-0.56003	-0.739848	0.438606	0.196151	37.4532	7	5	Proteasome subunit alpha type-1
UniRef90_Q9Y3I0	-0.744956	-0.744956	2.47592	1.75074	37.3703	3	2	UPF0027 protein C22orf28
UniRef90_P17655	-0.821452	-0.748461	0.280207	0.161778	37.3134	8	3	Calpain-2 catalytic subunit
UniRef90_P63104	-0.825429	-0.756998	0.27268	0.0681701	37.1751	21	16	14-3-3 protein zeta/delta
UniRef90_Q9NUP9	-0.757881	-0.757881	0.489962	0.346455	37.1608	6	2	Protein lin-7 homolog C
UniRef90_P40227	-0.714347	-0.765535	0.37115	0.165983	37.037	7	5	T-complex protein 1 subunit zeta
UniRef90_P62826	-0.408653	-0.769716	0.973056	0.486528	36.9695	5	4	GTP-binding nuclear protein Ran
UniRef90_P09417	-0.0618035	-0.773996	1.35074	0.60407	36.9004	7	5	Dihydropteridine reductase
UniRef90_P22314	-0.789158	-0.773996	0.430503	0.192527	36.9004	10	5	Ubiquitin-like modifier-activating enzyme 1
UniRef90_Q9NUQ9	-0.723824	-0.773996	0.140051	0.0808584	36.9004	4	3	Protein FAM49B
UniRef90_Q9WUA3	-0.722013	-0.773996	0.166182	0.0959455	36.9004	3	3	6-phosphofructokinase type C
UniRef90_O35114	-0.775992	-0.775992	0.113134	0.0799979	36.8682	3	2	Lysosome membrane protein 2
UniRef90_O60749	-0.4912	-0.777319	0.934908	0.381674	36.8468	10	6	Sorting nexin-2
UniRef90_Q16543	-0.609261	-0.799087	0.657108	0.379381	36.4964	4	3	Hsp90 co-chaperone Cdc37
UniRef90_Q9UN36	-0.761403	-0.799087	0.271432	0.102592	36.4964	11	7	Protein NDRG2
UniRef90_Q01518	-0.781687	-0.819616	0.52586	0.214681	36.1672	8	6	Adenylyl cyclase-associated protein 1
UniRef90_Q5XI32	0.430812	-0.831877	2.54204	1.46765	35.9712	4	3	F-actin-capping protein subunit beta
UniRef90_Q96KP4	-0.839149	-0.839149	0.0684149	0.0483766	35.8552	5	2	Cytosolic non-specific dipeptidase
UniRef90_B7Z4T9	-0.779674	-0.83996	0.243522	0.0920425	35.8423	10	7	cDNA FLJ54074, highly similar to T-complex protein 1 subunit eta
UniRef90_P30416	-0.843037	-0.843037	0.0739143	0.0522653	35.7933	3	2	FK506-binding protein 4, N-terminally processed
UniRef90_P16638	-0.997349	-0.843306	0.946118	0.299189	35.789	19	10	ATP-citrate synthase
UniRef90_P04632	-0.914629	-0.846191	0.354834	0.177417	35.743	6	4	Calpain small subunit 1
UniRef90_P49720	-0.970107	-0.847997	0.353222	0.157966	35.7143	5	5	Proteasome subunit beta type-3
UniRef90_P17987	-0.767987	-0.85599	0.382765	0.144672	35.5872	18	7	T-complex protein 1 subunit alpha
UniRef90_P25789	-0.867891	-0.867891	0.00558982	0.0039526	35.3983	4	2	Proteasome subunit alpha type-4
UniRef90_Q9UJW0	-0.868411	-0.868411	0.206397	0.145945	35.3901	2	2	Dynactin subunit 4
UniRef90_P08133	-0.912762	-0.871844	1.1685	0.238519	35.3357	43	24	Annexin A6
UniRef90_P52943	-0.886175	-0.886175	0.0882833	0.0624257	35.109	4	2	Cysteine-rich protein 2
UniRef90_P11142	-0.988921	-0.887504	0.504195	0.0920529	35.0881	36	30	Heat shock cognate 71 kDa protein
UniRef90_P27361	-1.08435	-0.918386	0.257071	0.114966	34.6021	11	5	Mitogen-activated protein kinase 3
UniRef90_P11940	-1.09451	-0.925999	0.63989	0.18472	34.4828	17	12	Polyadenylate-binding protein 1
UniRef90_P36578	-0.917306	-0.943626	0.606793	0.247722	34.2073	12	6	60S ribosomal protein L4
UniRef90_Q3U589	-0.948581	-0.948581	0.0105715	0.00747517	34.13	2	2	Putative uncharacterized protein
UniRef90_O75369	-0.955798	-0.955798	1.9523	1.38049	34.0176	5	2	Filamin-B
UniRef90_P84098	-1.09963	-0.956057	0.361593	0.208766	34.0136	6	3	60S ribosomal protein L19
UniRef90_P31939	-0.962392	-0.962392	0.302544	0.213931	33.9151	6	2	IMP cyclohydrolase
UniRef90_Q920E5	-1.25024	-0.965463	0.711446	0.355723	33.8674	6	4	Geranyltranstransferase
UniRef90_P35611	-0.744501	-0.992768	0.564161	0.252301	33.4448	8	5	Alpha-adducin
UniRef90_Q5TF21	-0.998845	-0.998845	0.0816547	0.0577386	33.3511	4	2	Uncharacterized protein C6orf174
UniRef90_Q9DBP5	-1.03809	-1	0.641073	0.286696	33.3333	7	5	UMP-CMP kinase
UniRef90_O94826	-1.02579	-1.02148	0.305502	0.176381	33.0033	6	3	Mitochondrial import receptor subunit TOM70
UniRef90_P06745	-0.996673	-1.02148	0.608299	0.168712	33.0033	22	13	Glucose-6-phosphate isomerase
UniRef90_Q8NHW5	-1.32801	-1.02148	0.915304	0.305101	33.0033	11	9	60S acidic ribosomal protein P0-like
UniRef90_Q13418	-0.980736	-1.03562	0.10121	0.0584337	32.7869	7	3	Integrin-linked protein kinase
UniRef90_P50148	-1.0391	-1.0391	0.0148928	0.0105308	32.7338	2	2	Guanine nucleotide-binding protein G(q) subunit alpha
UniRef90_P61160	-1.04838	-1.04838	0.724545	0.512331	32.5923	3	2	Actin-related protein 2
UniRef90_P08865	-1.74464	-1.04963	1.38209	0.797949	32.5733	10	3	40S ribosomal protein SA
UniRef90_P61247	-1.09324	-1.04963	0.68383	0.258463	32.5733	13	7	40S ribosomal protein S3a
UniRef90_P57776	-1.22568	-1.0635	0.559157	0.32283	32.3625	7	3	Elongation factor 1-delta
UniRef90_Q6NWC3	-1.10787	-1.0635	0.485338	0.183441	32.3625	9	7	Ribosomal protein S2
UniRef90_Q5JXJ1	-1.07163	-1.07163	0.362118	0.256056	32.2393	4	2	Proteasome (Prosome, macropain) subunit, alpha type, 7 (Fragment)
UniRef90_O70371	-0.958307	-1.08406	0.259467	0.149803	32.0513	6	3	Lipocortin V (Fragment)
UniRef90_P47755	-1.1062	-1.08406	0.199801	0.115355	32.0513	6	3	F-actin-capping protein subunit alpha-2
UniRef90_P62750	-1.08738	-1.08738	0.540947	0.382507	32.0013	4	2	60S ribosomal protein L23a
UniRef90_Q99497	-1.08848	-1.08848	0.456714	0.322946	31.9847	4	2	Protein DJ-1
UniRef90_Q9QZR6	-1.55019	-1.09085	1.26214	0.477043	31.9489	15	7	Septin-9
UniRef90_P07237	-0.825772	-1.11745	1.09859	0.293609	31.5494	18	14	Protein disulfide-isomerase
UniRef90_P62917	-1.24146	-1.12627	0.385197	0.192598	31.4176	5	4	60S ribosomal protein L8
UniRef90_P10637	-1.07912	-1.13673	0.34833	0.142205	31.2615	11	6	Microtubule-associated protein tau
UniRef90_O00303	-1.16969	-1.1375	0.98454	0.568425	31.25	6	3	Eukaryotic translation initiation factor 3 subunit F
UniRef90_Q06830	-1.27485	-1.17581	0.301179	0.095241	30.6823	17	10	Peroxiredoxin-1
UniRef90_Q99719	-0.979649	-1.18269	0.56154	0.324206	30.581	4	3	Septin-5
UniRef90_P17174	-1.18068	-1.19036	0.343355	0.171678	30.4683	10	4	Aspartate aminotransferase, cytoplasmic
UniRef90_Q13596	-1.19423	-1.19423	0.080227	0.056729	30.4115	8	2	Sorting nexin-1
UniRef90_P25787	-1.59866	-1.20054	1.04012	0.520062	30.319	8	4	Proteasome subunit alpha type-2
UniRef90_P17252	-1.20129	-1.20129	0.0443609	0.0313679	30.308	3	2	Protein kinase C alpha type
UniRef90_P31948	-1.16244	-1.20163	0.435233	0.125641	30.303	21	12	Stress-induced-phosphoprotein 1
UniRef90_Q14204	-1.20515	-1.20789	0.587847	0.0918063	30.2115	80	41	Cytoplasmic dynein 1 heavy chain 1
UniRef90_P22090	-1.14133	-1.22033	0.224965	0.129884	30.03	4	3	40S ribosomal protein S4, Y isoform 1
UniRef90_P85973	-1.22286	-1.22286	0.0568104	0.0401711	29.9931	3	2	Purine nucleoside phosphorylase
UniRef90_Q7L099	-1.23214	-1.23214	0.379948	0.268664	29.8583	5	2	Protein RUFY3
UniRef90_P08553	-0.465661	-1.23266	1.51484	0.874595	29.8507	6	3	Neurofilament medium polypeptide
UniRef90_P20618	-1.23956	-1.23956	0.219909	0.155499	29.7507	5	2	Proteasome subunit beta type-1
UniRef90_A4D1M6	-1.24071	-1.24071	0.155257	0.109783	29.734	4	2	HCG19809
UniRef90_Q08752	-1.24976	-1.24976	0.404874	0.286289	29.6031	5	2	40 kDa peptidyl-prolyl cis-trans isomerase
UniRef90_P29401	-1.14898	-1.25701	0.923367	0.349	29.4985	9	7	Transketolase
UniRef90_P46782	-1.10061	-1.26903	0.328136	0.189449	29.3255	12	3	40S ribosomal protein S5, N-terminally processed
UniRef90_Q9NTK5	-1.30848	-1.27101	0.438827	0.219413	29.2972	6	4	Obg-like ATPase 1
UniRef90_P62241	-0.769914	-1.27798	1.14765	0.573823	29.1971	7	4	40S ribosomal protein S8
UniRef90_P31040	-1.28576	-1.28576	2.11659	1.49665	29.0859	3	2	Succinate dehydrogenase [ubiquinone] flavoprotein subunit, mitochondrial
UniRef90_O94973	-1.28611	-1.28611	0.0669184	0.0473184	29.0809	6	2	AP-2 complex subunit alpha-2
UniRef90_Q9CYG7	-1.29987	-1.29278	0.347408	0.200576	28.9855	8	3	Mitochondrial import receptor subunit TOM34
UniRef90_P83731	-1.30865	-1.30865	0.356475	0.252066	28.7596	5	2	60S ribosomal protein L24
UniRef90_P13020	-1.54734	-1.32193	0.426401	0.246183	28.5714	6	3	Gelsolin
UniRef90_Q99LM2	-1.09235	-1.32193	0.521273	0.300957	28.5714	4	3	CDK5 regulatory subunit-associated protein 3
UniRef90_P28066	-1.32931	-1.32931	0.154123	0.108981	28.4671	2	2	Proteasome subunit alpha type-5
UniRef90_Q08209	-1.3597	-1.3597	0.746456	0.527824	28.0401	4	2	Serine/threonine-protein phosphatase 2B catalytic subunit alpha isoform
UniRef90_Q62188	-1.36984	-1.36984	0.0434167	0.0307003	27.8986	3	2	Dihydropyrimidinase-related protein 3
UniRef90_P63010	-1.83905	-1.37851	0.881833	0.293944	27.7778	13	9	AP-2 complex subunit beta
UniRef90_P45974	-1.38734	-1.38734	0.740195	0.523397	27.6552	6	2	Ubiquitin carboxyl-terminal hydrolase 5
UniRef90_Q4V8A7	-1.39928	-1.39928	3.10795	2.19765	27.4898	2	2	Atp8b2 protein
UniRef90_P26373	-1.74501	-1.40599	0.900238	0.519752	27.3973	9	3	60S ribosomal protein L13
UniRef90_P09525	-1.15086	-1.4242	1.05202	0.371947	27.147	15	8	Annexin A4
UniRef90_P34067	-1.42714	-1.42714	0.514257	0.363635	27.1067	5	2	Proteasome subunit beta type-4
UniRef90_Q61595	-1.46593	-1.43296	0.440703	0.25444	27.027	4	3	Kinectin
UniRef90_Q66JR7	-1.55245	-1.43533	0.302742	0.151371	26.9946	8	4	Pgm2 protein (Fragment)
UniRef90_P70296	-1.4442	-1.4442	0.164775	0.116514	26.8736	4	2	Hippocampal cholinergic neurostimulating peptide
UniRef90_O08795	-1.46443	-1.45113	0.104285	0.0521427	26.7793	8	4	Glucosidase 2 subunit beta
UniRef90_P18124	-1.71916	-1.45561	0.609292	0.304646	26.7186	7	4	60S ribosomal protein L7
UniRef90_Q05CS7	-1.94889	-1.45943	1.06729	0.616199	26.6667	5	3	Eea1 protein (Fragment)
UniRef90_O88398	-1.57065	-1.46467	0.216453	0.124969	26.5957	7	3	Advillin
UniRef90_P54652	-1.48358	-1.48358	0.398738	0.28195	26.3406	6	2	Heat shock-related 70 kDa protein 2
UniRef90_P10809	-1.47163	-1.49308	0.815738	0.182405	26.2131	31	20	60 kDa heat shock protein, mitochondrial
UniRef90_O54755	-1.4948	-1.4948	0.459438	0.324872	26.19	2	2	MIPP65
UniRef90_Q6NUK1	-1.10576	-1.50589	0.854758	0.493495	26.0417	5	3	Calcium-binding mitochondrial carrier protein SCaMC-1
UniRef90_Q14847	-1.78691	-1.51602	0.650025	0.375292	25.9067	8	3	LIM and SH3 domain protein 1
UniRef90_Q9DCN2	-2.08716	-1.52105	1.02031	0.456298	25.8398	8	5	NADH-cytochrome b5 reductase 3 soluble form
UniRef90_P26638	-1.43586	-1.53272	0.891898	0.364116	25.6851	11	6	Seryl-tRNA synthetase, cytoplasmic
UniRef90_Q00610	-1.65376	-1.53602	0.816077	0.173988	25.6415	45	22	Clathrin heavy chain 1
UniRef90_P62820	-1.54293	-1.54293	1.00559	0.711056	25.5502	2	2	Ras-related protein Rab-1A
UniRef90_Q9UHB9	-1.69216	-1.55346	0.54047	0.270235	25.4117	6	4	Signal recognition particle 68 kDa protein
UniRef90_Q96AG4	-1.64828	-1.5612	0.880498	0.440249	25.31	6	4	Leucine-rich repeat-containing protein 59
UniRef90_P26641	-1.39733	-1.58976	0.383191	0.221235	24.9377	6	3	Elongation factor 1-gamma
UniRef90_Q9P0L0	-1.51871	-1.59138	0.770632	0.314609	24.9167	6	6	Vesicle-associated membrane protein-associated protein A
UniRef90_Q68FX0	-1.60033	-1.60033	0.554991	0.392438	24.8008	7	2	Isocitrate dehydrogenase [NAD] subunit beta, mitochondrial
UniRef90_Q9NZR1	-1.56488	-1.61919	0.191173	0.0955864	24.5577	7	4	Tropomodulin-2
UniRef90_Q9UNH7	-1.63533	-1.63533	1.9578	1.38437	24.3511	2	2	Sorting nexin-6
UniRef90_P23396	-2.44618	-1.65076	1.71345	0.989263	24.1546	8	3	40S ribosomal protein S3
UniRef90_O08709	-1.6618	-1.6618	0.538595	0.380844	24.0147	4	2	Peroxiredoxin-6
UniRef90_P61201	-1.66808	-1.66808	0.386111	0.273022	23.9353	3	2	COP9 signalosome complex subunit 2
UniRef90_Q15404	-1.67426	-1.67426	0.759085	0.536754	23.8575	4	2	Ras suppressor protein 1
UniRef90_Q9D154	-1.60493	-1.69793	1.06631	0.435318	23.5607	10	6	Leukocyte elastase inhibitor A
UniRef90_O95861	-1.71133	-1.70044	0.708054	0.316651	23.5294	5	5	3&apos;(2&apos;),5&apos;-bisphosphate nucleotidase 1
UniRef90_Q6P9U0	-1.61619	-1.70044	0.410669	0.2371	23.5294	3	3	Serine (Or cysteine) peptidase inhibitor, clade B, member 6a
UniRef90_O08553	-1.99577	-1.73726	0.678967	0.196001	23.0733	23	12	Dihydropyrimidinase-related protein 2
UniRef90_P30101	-1.38844	-1.74416	1.26684	0.253369	22.9885	44	25	Protein disulfide-isomerase A3
UniRef90_Q14573	-0.975188	-1.74846	1.70547	0.984655	22.9358	8	3	Inositol 1,4,5-trisphosphate receptor type 3
UniRef90_Q4G079	-1.87063	-1.74887	0.630953	0.257585	22.9308	9	6	Small inducible cytokine subfamily E, member 1
UniRef90_P11021	-1.56432	-1.76129	0.381742	0.220399	22.779	4	3	78 kDa glucose-regulated protein
UniRef90_Q16181	-1.78531	-1.76129	0.317733	0.183443	22.779	7	3	Septin-7
UniRef90_Q6IRK8	-1.90726	-1.77823	1.04887	0.524433	22.5731	4	4	Spna2 protein
UniRef90_P40429	-1.52391	-1.78981	0.6835	0.34175	22.4332	8	4	60S ribosomal protein L13a
UniRef90_P28838	-1.68709	-1.80155	0.493076	0.201298	22.2919	10	6	Cytosol aminopeptidase
UniRef90_Q07020	-1.85657	-1.80721	0.36096	0.18048	22.224	7	4	60S ribosomal protein L18
UniRef90_P24268	-1.66983	-1.81555	1.09276	0.546379	22.1242	9	4	Cathepsin D 30 kDa heavy chain
UniRef90_Q9UNX3	-1.8167	-1.8167	0.635453	0.449333	22.1104	4	2	60S ribosomal protein L26-like 1
UniRef90_P40925	-1.82373	-1.82373	0.0115271	0.00815091	22.0267	4	2	Malate dehydrogenase, cytoplasmic
UniRef90_O70503	-1.92814	-1.82375	0.424471	0.245069	22.0264	3	3	Estradiol 17-beta-dehydrogenase 12
UniRef90_Q9BT78	-1.83139	-1.83139	0.362145	0.256075	21.9356	7	2	COP9 signalosome complex subunit 4
UniRef90_P15791	-2.15169	-1.84393	1.36927	0.684634	21.7871	7	4	Calcium/calmodulin-dependent protein kinase type II subunit delta
UniRef90_Q5XIC0	-1.73342	-1.86948	0.458874	0.229437	21.4868	7	4	Peroxisomal 3,2-trans-enoyl-CoA isomerase
UniRef90_Q9NVD7	-2.1151	-1.89918	0.878862	0.393039	21.1416	9	5	Alpha-parvin
UniRef90_P27824	-1.7864	-1.91456	0.718284	0.18546	20.9644	22	15	Calnexin
UniRef90_Q9Y4L1	-2.08088	-1.91456	0.649153	0.374789	20.9644	5	3	Hypoxia up-regulated protein 1
UniRef90_P27797	-1.62589	-1.91839	0.883455	0.294485	20.9205	16	9	Calreticulin
UniRef90_P24270	-1.59687	-1.93481	1.08666	0.443627	20.7328	12	6	Catalase
UniRef90_Q3T025	-1.96051	-1.95942	0.310499	0.15525	20.4538	4	4	60S ribosomal protein L17
UniRef90_P35232	-2.12756	-1.97085	1.10541	0.494355	20.3252	8	5	Prohibitin
UniRef90_P07942	-1.98081	-1.98081	1.49173	1.05481	20.2137	4	2	Laminin subunit beta-1
UniRef90_O75396	-2.00414	-2.00414	0.220814	0.156139	19.9542	5	2	Vesicle-trafficking protein SEC22b
UniRef90_P12367	-1.72376	-2.01078	0.765728	0.442093	19.8807	5	3	cAMP-dependent protein kinase type II-alpha regulatory subunit
UniRef90_Q86VP6	-1.90631	-2.01113	0.63066	0.31533	19.8769	6	4	Cullin-associated NEDD8-dissociated protein 1
UniRef90_Q64727	-2.1857	-2.04084	0.57198	0.108094	19.5509	68	28	Vinculin
UniRef90_P62424	-2.19166	-2.04587	0.592383	0.241839	19.4961	10	6	60S ribosomal protein L7a
UniRef90_P15146	-2.08753	-2.08753	0.170218	0.120362	19.0469	3	2	Microtubule-associated protein 2
UniRef90_P16884	-2.06774	-2.10769	0.664623	0.38372	18.8324	3	3	Neurofilament heavy polypeptide
UniRef90_P46781	-2.10939	-2.10939	0.987071	0.697964	18.8144	7	2	40S ribosomal protein S9
UniRef90_P41219	-2.37952	-2.11437	0.737694	0.245898	18.7617	30	9	Peripherin
UniRef90_Q9Y5X3	-2.12694	-2.12694	0.205182	0.145085	18.6293	6	2	Sorting nexin-5
UniRef90_P26640	-2.135	-2.135	1.85439	1.31125	18.5447	3	2	Valyl-tRNA synthetase
UniRef90_P51572	-2.18555	-2.16993	0.0768696	0.0443807	18.1818	6	3	B-cell receptor-associated protein 31
UniRef90_O95865	-2.21735	-2.18902	0.141468	0.0707341	17.9858	7	4	N(G),N(G)-dimethylarginine dimethylaminohydrolase 2
UniRef90_Q12905	-2.1916	-2.1916	0.27607	0.195211	17.9594	3	2	Interleukin enhancer-binding factor 2
UniRef90_O60763	-2.07475	-2.19849	0.912203	0.34478	17.8891	10	7	General vesicular transport factor p115
UniRef90_Q04447	-2.30725	-2.19935	0.268355	0.134178	17.8804	7	4	Creatine kinase B-type
UniRef90_P47740	-2.20191	-2.20191	0.0864479	0.0611279	17.8544	3	2	Fatty aldehyde dehydrogenase
UniRef90_P39023	-2.21544	-2.21544	1.19935	0.848066	17.7172	2	2	60S ribosomal protein L3
UniRef90_Q99436	-2.22184	-2.22184	1.39891	0.989176	17.6527	2	2	Proteasome subunit beta type-7
UniRef90_Q15084	-1.82512	-2.23266	0.766352	0.442454	17.5439	8	3	Protein disulfide-isomerase A6
UniRef90_P07196	-2.21252	-2.25093	0.467607	0.233803	17.3614	10	4	Neurofilament light polypeptide
UniRef90_Q9Z2I0	-2.28851	-2.26883	0.285524	0.116565	17.1841	7	6	LETM1 and EF-hand domain-containing protein 1, mitochondrial
UniRef90_Q9NZ01	-2.27261	-2.27261	0.79665	0.563317	17.1469	2	2	Trans-2,3-enoyl-CoA reductase
UniRef90_Q9DB77	-1.97518	-2.27271	1.35709	0.678543	17.1459	11	4	Cytochrome b-c1 complex subunit 2, mitochondrial
UniRef90_Q921H8	-2.58465	-2.27493	0.766482	0.383241	17.124	7	4	3-ketoacyl-CoA thiolase A, peroxisomal
UniRef90_P21796	-2.4839	-2.28231	0.782711	0.247515	17.0516	11	10	Voltage-dependent anion-selective channel protein 1
UniRef90_Q80UE4	-2.30818	-2.30818	0.336285	0.23779	16.7995	6	2	Protein 4.1G
UniRef90_P62906	-2.51956	-2.31607	0.800237	0.400119	16.7232	8	4	60S ribosomal protein L10a
UniRef90_P07954	-2.51112	-2.32154	0.665562	0.332781	16.6704	5	4	Fumarate hydratase, mitochondrial
UniRef90_P08003	-3.06058	-2.33342	1.49619	0.863823	16.5563	6	3	Protein disulfide-isomerase A4
UniRef90_Q13362	-2.36176	-2.36176	0.87952	0.621915	16.2867	3	2	Serine/threonine-protein phosphatase 2A 56 kDa regulatory subunit gamma isoform
UniRef90_P78536	-2.36447	-2.36447	0.270602	0.191344	16.2611	2	2	Disintegrin and metalloproteinase domain-containing protein 17
UniRef90_P32969	-2.05693	-2.36737	0.588236	0.339618	16.2338	5	3	60S ribosomal protein L9
UniRef90_Q9UH65	-2.15003	-2.37282	0.505218	0.252609	16.1825	5	4	Switch-associated protein 70
UniRef90_P19096	-2.16673	-2.40327	0.702943	0.181499	15.8983	38	15	Oleoyl-[acyl-carrier-protein] hydrolase
UniRef90_P05091	-2.40642	-2.40642	0.93657	0.662255	15.8691	2	2	Aldehyde dehydrogenase, mitochondrial
UniRef90_Q9BVK6	-1.39044	-2.42151	2.09833	1.04917	15.7299	8	4	Transmembrane emp24 domain-containing protein 9
UniRef90_P09622	-1.96281	-2.43296	1.48564	0.664396	15.625	6	5	Dihydrolipoyl dehydrogenase, mitochondrial
UniRef90_Q8BMK4	-2.25103	-2.50335	0.936596	0.540744	14.9925	7	3	Cytoskeleton-associated protein 4
UniRef90_P51174	-2.64037	-2.51854	0.393765	0.22734	14.8588	8	3	Long-chain specific acyl-CoA dehydrogenase, mitochondrial
UniRef90_P50213	-2.42544	-2.53346	0.616611	0.218005	14.7285	14	8	Isocitrate dehydrogenase [NAD] subunit alpha, mitochondrial
UniRef90_Q62446	-2.42938	-2.55827	1.27223	0.734525	14.5138	4	3	FK506-binding protein 3
UniRef90_P08249	-2.15673	-2.5969	1.4513	0.387877	14.1847	20	14	Malate dehydrogenase, mitochondrial
UniRef90_Q8CAY6	-2.60635	-2.60635	0.0234525	0.0165834	14.1052	10	2	Acetyl-CoA acetyltransferase, cytosolic
UniRef90_Q8BMS1	-2.61947	-2.63459	0.597693	0.345078	13.8696	7	3	Long chain 3-hydroxyacyl-CoA dehydrogenase
UniRef90_O75390	-2.77708	-2.75061	0.259653	0.0981396	12.9366	13	7	Citrate synthase, mitochondrial
UniRef90_P10252	-2.75936	-2.75936	0.461603	0.326403	12.8684	3	2	CD48 antigen
UniRef90_P45880	-2.77318	-2.77318	0.36368	0.25716	12.7614	4	2	Voltage-dependent anion-selective channel protein 2
UniRef90_Q9Z2I9	-2.656	-2.774	0.417503	0.241046	12.7551	6	3	Succinyl-CoA ligase [ADP-forming] subunit beta, mitochondrial
UniRef90_P06576	-2.50353	-2.82579	1.16848	0.441646	12.3609	22	7	ATP synthase subunit beta, mitochondrial
UniRef90_P00405	-2.86033	-2.86033	0.6932	0.490166	12.1039	7	2	Cytochrome c oxidase subunit 2
UniRef90_P53007	-2.86175	-2.86175	0.460608	0.325699	12.0934	8	2	Tricarboxylate transport protein, mitochondrial
UniRef90_P25705	-2.6687	-2.95081	1.09821	0.388277	11.4523	23	8	ATP synthase subunit alpha, mitochondrial
UniRef90_Q96A33	-2.97237	-2.97237	0.98201	0.694386	11.3017	5	2	Coiled-coil domain-containing protein 47
UniRef90_P00505	-3.10334	-2.9782	0.328293	0.098984	11.2613	24	11	Aspartate aminotransferase, mitochondrial
UniRef90_P00367	-3.14588	-3.0268	0.328614	0.146961	10.929	10	5	Glutamate dehydrogenase 1, mitochondrial
UniRef90_P08574	-3.11762	-3.11762	0.184277	0.130303	10.331	4	2	Cytochrome c1, heme protein, mitochondrial
UniRef90_Q9BPU6	-3.27387	-3.13093	0.448203	0.25877	10.2459	7	3	Dihydropyrimidinase-related protein 5
UniRef90_Q9D110	-3.13399	-3.13399	1.17306	0.829482	10.2264	2	2	5-formyltetrahydrofolate cyclo-ligase
UniRef90_P80404	-3.04745	-3.15866	2.50826	1.44815	10.0705	7	3	4-aminobutyrate aminotransferase, mitochondrial
UniRef90_Q9R0H0	-2.99115	-3.16964	0.4286	0.2143	10.0018	8	4	Peroxisomal acyl-coenzyme A oxidase 1
UniRef90_P51553	-3.26818	-3.26818	1.2978	0.917685	9.40352	2	2	Isocitrate dehydrogenase [NAD] subunit gamma, mitochondrial
UniRef90_Q02252	-2.58024	-3.3461	3.15965	1.57982	8.95338	12	4	Methylmalonate-semialdehyde dehydrogenase [acylating], mitochondrial
UniRef90_P40630	-3.36565	-3.36565	0.205508	0.145316	8.84356	4	2	Transcription factor A, mitochondrial
UniRef90_Q9DB20	-3.50084	-3.36784	0.509007	0.207801	8.83129	17	6	ATP synthase subunit O, mitochondrial
UniRef90_Q6AY48	-3.45687	-3.37851	0.387675	0.223824	8.77193	4	3	Poly(RC) binding protein 3
UniRef90_Q3KR86	-3.32935	-3.39232	0.292224	0.168716	8.69565	5	3	Inner membrane protein, mitochondrial
UniRef90_P13804	-3.39745	-3.40599	0.300104	0.113429	8.62069	8	7	Electron transfer flavoprotein subunit alpha, mitochondrial
UniRef90_Q16836	-3.50388	-3.44626	2.79329	1.6127	8.40336	9	3	Hydroxyacyl-coenzyme A dehydrogenase, mitochondrial
UniRef90_P11532	-2.76291	-3.48543	1.68001	0.751323	8.19672	12	5	Dystrophin
UniRef90_P14415	-3.46565	-3.49084	0.637069	0.318535	8.16853	8	4	Sodium/potassium-transporting ATPase subunit beta-2
UniRef90_Q8QZT1	-3.74582	-3.51096	0.772803	0.446178	8.06452	5	3	Acetyl-CoA acetyltransferase, mitochondrial
UniRef90_Q9WTP7	-3.27142	-3.52356	0.501607	0.289603	8	8	3	GTP:AMP phosphotransferase mitochondrial
UniRef90_O43175	-3.67563	-3.54844	0.60644	0.271208	7.87402	13	5	D-3-phosphoglycerate dehydrogenase
UniRef90_Q96I99	-3.57337	-3.58496	0.455764	0.172263	7.69231	10	7	Succinyl-CoA ligase [GDP-forming] subunit beta, mitochondrial
UniRef90_Q9JHI5	-2.9051	-3.59694	1.61764	0.933948	7.63359	6	3	Isovaleryl-CoA dehydrogenase, mitochondrial
UniRef90_P50993	-2.89323	-3.59807	1.68964	0.689791	7.62806	13	6	Sodium/potassium-transporting ATPase subunit alpha-2
UniRef90_P04904	-3.61063	-3.63074	0.76714	0.38357	7.47	6	4	Glutathione S-transferase alpha-3
UniRef90_Q9CQQ7	-3.92981	-3.7761	0.73344	0.423452	6.80272	10	3	ATP synthase subunit b, mitochondrial
UniRef90_Q8BTG3	-3.78841	-3.78841	5.1447	3.63785	6.74883	2	2	T-complex protein 11-like protein 1
UniRef90_Q8BH95	-3.76779	-3.85361	1.1901	0.59505	6.46992	9	4	Enoyl-CoA hydratase, mitochondrial
UniRef90_P13086	-4.11571	-4.05007	0.551913	0.225318	5.69313	8	6	Succinyl-CoA ligase [GDP-forming] subunit alpha, mitochondrial
UniRef90_P48735	-4.27073	-4.13713	0.420763	0.210382	5.37766	6	4	Isocitrate dehydrogenase [NADP], mitochondrial
UniRef90_Q8VI04	-4.01579	-4.21723	1.96306	1.13338	5.10204	5	3	L-asparaginase
UniRef90_Q00577	-5.02217	-4.60978	1.22636	0.613182	3.93447	8	4	Transcriptional activator protein Pur-alpha
UniRef90_P02768	-4.67629	-4.67629	2.13486	1.50958	3.76387	9	2	Serum albumin
UniRef90_Q8K442	-4.80815	-4.80815	0.627307	0.443573	3.44645	4	2	ATP-binding cassette sub-family A member 8-A
UniRef90_Q8BWT1	-4.40685	-4.95888	1.61745	0.660321	3.11519	15	6	3-ketoacyl-CoA thiolase, mitochondrial

## Sheet: control 48h
UniRef90	Mean	Median	Std Dev	Std Err	Incorporation (%)	N (all peptides)	N (quanti peptides)	Cluster Name
UniRef90_Q8NFZ8	4.18902	4.18902	0.747891	0.528839	94.8024	9	2	Cell adhesion molecule 4
UniRef90_Q0VBD0	4.03195	3.86145	0.377248	0.217804	93.5629	7	3	Integrin beta
UniRef90_P21263	3.55405	3.67669	0.55566	0.134767	92.7472	66	17	Nestin
UniRef90_Q8R2Y2	3.4137	3.35275	1.17935	0.589675	91.0841	8	4	Cell surface glycoprotein MUC18
UniRef90_Q8R1F1	3.37748	3.29336	0.195736	0.113008	90.7441	8	3	Niban-like protein 1
UniRef90_Q794F9	3.22962	3.22962	0.87877	0.621384	90.3663	3	2	4F2 cell-surface antigen heavy chain
UniRef90_P35762	3.4368	3.19536	0.708121	0.35406	90.1575	5	4	CD81 antigen
UniRef90_Q14118	3.072	3.072	1.80473	1.27614	89.3723	3	2	Beta-dystroglycan
UniRef90_Q60780	3.03591	3.05903	0.63706	0.260079	89.2866	11	6	Growth arrest-specific protein 7
UniRef90_P60880	2.88869	2.88869	0.493804	0.349172	88.1037	5	2	Synaptosomal-associated protein 25
UniRef90_P14873	2.8384	2.86775	0.696927	0.232309	87.9507	13	9	MAP1 light chain LC1
UniRef90_P08226	2.19966	2.76611	1.4617	0.843911	87.184	14	3	Apolipoprotein E
UniRef90_Q63663	2.56434	2.72577	0.74368	0.37184	86.8682	8	4	Interferon-induced guanylate-binding protein 2
UniRef90_Q14764	2.71711	2.71711	0.896564	0.633967	86.7996	6	2	Major vault protein
UniRef90_Q9Y696	1.98016	2.67354	1.77435	0.887175	86.4497	5	4	Chloride intracellular channel protein 4
UniRef90_P04925	2.66325	2.66325	0.611184	0.432172	86.3659	2	2	Major prion protein
UniRef90_P97706	1.51278	2.62593	1.93578	1.11763	86.0585	6	3	Sodium channel
UniRef90_Q5VZY9	2.62401	2.62401	0.649306	0.459128	86.0425	4	2	Doublecortin and CaM kinase-like 1
UniRef90_Q38PF9	2.47366	2.47366	0.427511	0.302296	84.7434	2	2	AHNAK 1 (Fragment)
UniRef90_O00299	2.28068	2.42317	0.652325	0.326162	84.2854	6	4	Chloride intracellular channel protein 1
UniRef90_P37802	2.41005	2.41005	0.124628	0.0881253	84.1645	12	2	Transgelin-2
UniRef90_P62993	2.33726	2.33726	0.29794	0.210676	83.4804	2	2	Growth factor receptor-bound protein 2
UniRef90_P35221	2.2397	2.20867	1.11225	0.321078	82.2143	18	12	Catenin alpha-1
UniRef90_Q5R1W9	2.07163	2.15524	0.378888	0.154681	81.6663	8	6	L-lactate dehydrogenase A chain
UniRef90_P62988	2.07654	2.12344	0.1945	0.0972499	81.3339	6	4	Ubiquitin
UniRef90_Q865V6	2.07813	2.07493	0.687211	0.343606	80.818	5	4	Macrophage-capping protein
UniRef90_P31689	2.05372	2.05372	0.328931	0.232589	80.5891	3	2	DnaJ homolog subfamily A member 1
UniRef90_Q9P273	1.92639	2.00578	1.39428	0.80499	80.0641	7	3	Teneurin-3
UniRef90_A1A5P0	0.719989	1.99424	2.32818	1.34417	79.9361	3	3	Cdc42 effector protein 1
UniRef90_P26038	1.85374	1.96201	0.73547	0.300255	79.5753	12	6	Moesin
UniRef90_Q5SSZ5	1.96188	1.96188	0.241856	0.171018	79.5738	3	2	Tensin-3
UniRef90_P60660	1.95247	1.95247	0.142024	0.100426	79.4676	3	2	Myosin light polypeptide 6
UniRef90_P16330	1.92883	1.94902	0.127049	0.0366757	79.4286	15	12	2&apos;,3&apos;-cyclic-nucleotide 3&apos;-phosphodiesterase
UniRef90_Q38PG3	1.74254	1.85204	0.578458	0.333973	78.3085	3	3	AHNAK 1 (Fragment)
UniRef90_Q8WUM4	1.36076	1.851	1.37255	0.686277	78.2963	7	4	Programmed cell death 6-interacting protein
UniRef90_Q38PG2	1.84752	1.84752	0.681148	0.481644	78.2552	2	2	AHNAK 1 (Fragment)
UniRef90_Q6UL10	1.55663	1.84684	0.608584	0.351366	78.2473	3	3	AHNAK (Fragment)
UniRef90_Q15417	1.80765	1.76121	0.247054	0.0744895	77.2201	20	11	Calponin-3
UniRef90_P14602	1.75148	1.75633	0.00839947	0.00484944	77.1605	9	3	Heat shock protein beta-1
UniRef90_Q9QYR6	1.77518	1.68973	0.267539	0.133769	76.3367	6	4	MAP1 light chain LC2
UniRef90_P10644	1.65565	1.65565	2.07133	1.46465	75.9073	3	2	cAMP-dependent protein kinase type I-alpha regulatory subunit
UniRef90_P55209	1.60928	1.60928	0.544418	0.384962	75.3147	2	2	Nucleosome assembly protein 1-like 1
UniRef90_Q9R111	1.60609	1.60609	0.318577	0.225268	75.2736	5	2	Guanine deaminase
UniRef90_P50454	2.88318	1.58168	2.73512	1.11661	74.9573	11	6	Serpin H1
UniRef90_O70419	1.49723	1.55216	0.138141	0.0797557	74.5712	4	3	Cortactin isoform C
UniRef90_O54901	1.54848	1.54848	0.444085	0.314016	74.5229	2	2	OX-2 membrane glycoprotein
UniRef90_O35547	1.50043	1.50043	0.603066	0.426432	73.8854	2	2	Long-chain-fatty-acid--CoA ligase 4
UniRef90_Q7TP42	1.4942	1.4942	0.02299	0.0162564	73.802	2	2	Ab2-292
UniRef90_Q63560	1.45506	1.45506	0.292668	0.206948	73.274	4	2	Microtubule-associated protein 6
UniRef90_P25189	1.38041	1.43252	0.139601	0.0698005	72.967	11	4	Myelin protein P0
UniRef90_Q62465	0.257153	1.36959	2.0544	0.619425	72.0981	19	11	Synaptic vesicle membrane protein VAT-1 homolog
UniRef90_Q99P72	1.3525	1.36959	0.413987	0.114819	72.0981	19	13	Reticulon-4
UniRef90_Q8VI36-2	1.36073	1.36073	2.1917	1.54977	71.9743	3	2	Isoform Alpha of Paxillin
UniRef90_P30999	1.35297	1.35297	0.0182405	0.012898	71.8657	12	2	Catenin delta-1
UniRef90_P19157	1.29695	1.32379	0.153677	0.0768385	71.4549	7	4	Glutathione S-transferase P 1
UniRef90_Q86Y82	1.29774	1.29774	0.122815	0.0868435	71.0852	5	2	Syntaxin-12
UniRef90_P07737	1.60791	1.28279	0.699865	0.404067	70.8717	5	3	Profilin-1
UniRef90_P21333	1.25045	1.2723	0.458614	0.0775199	70.7214	55	35	Filamin-A
UniRef90_Q9Y490	1.05585	1.2723	0.671403	0.223801	70.7214	17	9	Talin-1
UniRef90_Q63258	1.25149	1.25149	0.280855	0.198595	70.4218	7	2	Integrin alpha-7 light chain
UniRef90_P05556	1.00291	1.23786	1.02621	0.387871	70.2247	14	7	Integrin beta-1
UniRef90_P35579	1.32177	1.23786	1.3867	0.418106	70.2247	20	11	Myosin-9
UniRef90_B7ZLX0	1.14706	1.23107	0.205175	0.118458	70.1262	5	3	ITGAV protein
UniRef90_Q99613	1.22741	1.22741	0.216955	0.153411	70.073	2	2	Eukaryotic translation initiation factor 3 subunit C
UniRef90_O35110	1.22534	1.22534	0.930973	0.658297	70.0429	3	2	Dynein light intermediate chain 53/55 (Fragment)
UniRef90_O88447	1.65437	1.20423	0.811128	0.468305	69.735	3	3	Kinesin light chain 1
UniRef90_Q9JI55	1.08541	1.20423	0.627989	0.120857	69.735	75	27	Plectin-1 (Fragment)
UniRef90_Q9H223	1.1953	1.1953	0.123734	0.0874932	69.6041	5	2	EH domain-containing protein 4
UniRef90_Q13177	1.18368	1.18368	0.0718215	0.0507855	69.4335	5	2	PAK-2p34
UniRef90_Q9ESN0	0.975546	1.16488	0.611323	0.16955	69.1563	33	13	Protein Niban
UniRef90_Q92597	0.747725	1.15044	0.962514	0.481257	68.9424	9	4	Protein NDRG1
UniRef90_P23528	1.16321	1.15041	0.192834	0.0681772	68.9419	8	8	Cofilin-1
UniRef90_P43034	1.14388	1.14388	0.132907	0.0939795	68.8449	5	2	Platelet-activating factor acetylhydrolase IB subunit alpha
UniRef90_Q8CI51	1.18051	1.13708	0.476638	0.238319	68.7437	4	4	PDZ and LIM domain protein 5
UniRef90_P08238	1.11937	1.1078	0.304525	0.0918179	68.306	21	11	Heat shock protein HSP 90-beta
UniRef90_P62910	1.06361	1.06361	1.60371	1.13399	67.6391	2	2	60S ribosomal protein L32
UniRef90_Q15691	1.02965	1.02965	0.0541426	0.0382846	67.1219	5	2	Microtubule-associated protein RP/EB family member 1
UniRef90_P07355	0.980652	1.02334	0.459838	0.0869013	67.0253	46	28	Annexin A2
UniRef90_P21291	0.971166	1.00289	0.151897	0.0876979	66.7111	4	3	Cysteine and glycine-rich protein 1
UniRef90_P33176	1.20523	0.995068	0.605536	0.247209	66.5907	9	6	Kinesin-1 heavy chain
UniRef90_P27321	0.991937	0.991937	0.107482	0.0760015	66.5424	2	2	Calpastatin
UniRef90_P27274	0.991529	0.991529	0.258931	0.183092	66.5361	4	2	CD59 glycoprotein
UniRef90_P08670	0.877545	0.982802	0.327212	0.0530808	66.4012	88	38	Vimentin
UniRef90_P51149	0.939232	0.96016	0.0763035	0.0440538	66.0502	9	3	Ras-related protein Rab-7a
UniRef90_Q9NP72	0.950278	0.950278	0.36857	0.260618	65.8964	3	2	Ras-related protein Rab-18
UniRef90_P04075	1.01011	0.946194	0.262118	0.0726984	65.8328	22	13	Fructose-bisphosphate aldolase A
UniRef90_Q5M7W5	0.954977	0.944821	0.332596	0.0831489	65.8114	24	16	Microtubule-associated protein 4
UniRef90_Q62736	0.895293	0.932372	0.257909	0.0815579	65.617	13	10	Non-muscle caldesmon
UniRef90_P68104	0.772965	0.905028	1.23437	0.50393	65.1881	7	6	Elongation factor 1-alpha 1
UniRef90_P05023	0.893659	0.893659	0.0625351	0.044219	65.0091	3	2	Sodium/potassium-transporting ATPase subunit alpha-1
UniRef90_Q01082	0.933519	0.867752	0.365664	0.0762463	64.5995	44	23	Spectrin beta chain, brain 1
UniRef90_P04899	0.855898	0.855898	0.0849069	0.0600382	64.4113	9	2	Guanine nucleotide-binding protein G(i) subunit alpha-2
UniRef90_P17046	0.848212	0.848212	0.546245	0.386253	64.2891	2	2	Lysosome-associated membrane glycoprotein 2
UniRef90_P49006	0.838113	0.838113	1.28482	0.908503	64.1283	4	2	MARCKS-related protein
UniRef90_P70460	0.82384	0.82384	0.514586	0.363867	63.9004	2	2	Vasodilator-stimulated phosphoprotein
UniRef90_P84095	0.82265	0.82265	0.549064	0.388247	63.8813	3	2	Rho-related GTP-binding protein RhoG
UniRef90_P26645	0.848839	0.821126	0.632027	0.238884	63.857	10	7	Myristoylated alanine-rich C-kinase substrate
UniRef90_P30153	0.809099	0.809099	0.10541	0.0745361	63.6643	7	2	Serine/threonine-protein phosphatase 2A 65 kDa regulatory subunit A alpha isoform
UniRef90_Q9UNZ2	0.803395	0.803395	0.0035607	0.00251779	63.5728	9	2	NSFL1 cofactor p47
UniRef90_Q5QD51	0.844766	0.798543	0.281269	0.088945	63.4949	13	10	A-kinase anchor protein 12
UniRef90_P14618	0.779709	0.779709	0.657576	0.464976	63.1918	3	2	Pyruvate kinase isozymes M1/M2
UniRef90_P13639	0.717602	0.77596	0.368395	0.13924	63.1313	14	7	Elongation factor 2
UniRef90_Q9Y6G9	1.3432	0.76366	1.53457	0.885986	62.9327	5	3	Cytoplasmic dynein 1 light intermediate chain 1
UniRef90_O43707	0.72469	0.749038	0.234567	0.0489106	62.6959	38	23	Alpha-actinin-4
UniRef90_P46940	0.797557	0.744653	0.417158	0.131917	62.6248	18	10	Ras GTPase-activating-like protein IQGAP1
UniRef90_P50990	0.741833	0.741833	0.0170596	0.0120629	62.579	3	2	T-complex protein 1 subunit theta
UniRef90_O60884	0.729252	0.729252	0.0625634	0.044239	62.3746	3	2	DnaJ homolog subfamily A member 2
UniRef90_P62834	0.692356	0.692356	0.618546	0.437378	61.7725	2	2	Ras-related protein Rap-1A
UniRef90_P62879	0.676064	0.676064	0.219619	0.155294	61.5055	5	2	Guanine nucleotide-binding protein G(I)/G(S)/G(T) subunit beta-2
UniRef90_P27635	0.673699	0.673699	0.0894719	0.0632662	61.4667	2	2	60S ribosomal protein L10
UniRef90_P13596	0.496974	0.664496	1.23317	0.616587	61.3155	6	4	Neural cell adhesion molecule 1
UniRef90_Q04917	0.652092	0.652092	0.0432803	0.0306038	61.1114	3	2	14-3-3 protein eta
UniRef90_Q14240	0.661921	0.643856	0.11352	0.0655407	60.9756	7	3	Eukaryotic initiation factor 4A-II
UniRef90_P00492	0.624452	0.624452	0.829359	0.586445	60.6551	3	2	Hypoxanthine-guanine phosphoribosyltransferase
UniRef90_Q7L1Q6	0.622684	0.622684	1.14794	0.811718	60.6259	2	2	Basic leucine zipper and W2 domain-containing protein 1
UniRef90_P54578	0.619706	0.619706	0.0501552	0.0354651	60.5766	5	2	Ubiquitin carboxyl-terminal hydrolase 14
UniRef90_O75083	0.569062	0.593	0.125532	0.0627662	60.1336	6	4	WD repeat-containing protein 1
UniRef90_Q96CW1	0.584962	0.584962	0.526645	0.372394	60	2	2	AP-2 complex subunit mu
UniRef90_P37837	0.35985	0.584241	0.396196	0.228744	59.988	3	3	Transaldolase
UniRef90_Q9CYZ2	0.575004	0.575004	0.0941869	0.0666002	59.8342	3	2	Tumor protein D54
UniRef90_P26641	0.183314	0.567041	0.924354	0.413384	59.7015	9	5	Elongation factor 1-gamma
UniRef90_P41091	0.565941	0.565941	0.110189	0.0779151	59.6832	4	2	Eukaryotic translation initiation factor 2 subunit 3
UniRef90_Q61490	0.535748	0.560682	0.0867199	0.04336	59.5954	5	4	CD166 antigen
UniRef90_Q14CZ8	0.516416	0.516416	1.1856	0.838344	58.8545	4	2	Hepatocyte cell adhesion molecule
UniRef90_P60953	0.515764	0.515764	0.137	0.0968738	58.8435	3	2	Cell division control protein 42 homolog
UniRef90_P78371	0.511567	0.511567	0.0218142	0.015425	58.7731	3	2	T-complex protein 1 subunit beta
UniRef90_Q15907	0.497189	0.497189	0.0777351	0.054967	58.5314	3	2	Ras-related protein Rab-11B
UniRef90_P35611	0.268748	0.490051	0.65808	0.294302	58.4112	10	5	Alpha-adducin
UniRef90_Q14974	0.482644	0.482644	0.5822	0.411678	58.2864	5	2	Importin subunit beta-1
UniRef90_P05026	0.472072	0.472072	0.314308	0.222249	58.1082	2	2	Sodium/potassium-transporting ATPase subunit beta-1
UniRef90_P52565	0.243306	0.471929	0.836182	0.252118	58.1058	15	11	Rho GDP-dissociation inhibitor 1
UniRef90_O70257	0.468577	0.468577	0.0973643	0.0688469	58.0492	4	2	Syntaxin-7
UniRef90_P62333	0.468021	0.468021	0.0225766	0.0159641	58.0398	3	2	26S protease regulatory subunit S10B
UniRef90_Q9UNM6	0.740045	0.444184	1.7823	0.797067	57.6369	7	5	26S proteasome non-ATPase regulatory subunit 13
UniRef90_P63244	0.434906	0.434906	0.0923647	0.0653117	57.4798	4	2	Guanine nucleotide-binding protein subunit beta-2-like 1
UniRef90_Q52NJ6	0.228744	0.42765	0.66254	0.33127	57.3568	5	4	Ras-related protein Rab-14
UniRef90_P38646	0.269415	0.413116	0.281348	0.11486	57.1102	10	6	Stress-70 protein, mitochondrial
UniRef90_O70503	0.410461	0.410461	0.986191	0.697342	57.0652	3	2	Estradiol 17-beta-dehydrogenase 12
UniRef90_P40227	0.140154	0.405958	0.871826	0.435913	56.9887	5	4	T-complex protein 1 subunit zeta
UniRef90_P11233	0.356348	0.403542	0.307549	0.13754	56.9476	8	5	Ras-related protein Ral-A
UniRef90_P52306	0.38671	0.38671	0.0373426	0.0264052	56.6613	5	2	Rap1 GTPase-GDP dissociation stimulator 1
UniRef90_Q9NZM1	0.385218	0.385218	1.04844	0.741362	56.6359	3	2	Myoferlin
UniRef90_P09382	0.379486	0.379486	0.364334	0.257623	56.5383	4	2	Galectin-1
UniRef90_O43242	0.350686	0.350686	0.137785	0.0974288	56.0472	4	2	26S proteasome non-ATPase regulatory subunit 3
UniRef90_Q9H0U4	0.316435	0.316435	0.189008	0.133649	55.4615	2	2	Ras-related protein Rab-1B
UniRef90_P10096	0.270798	0.309243	0.306653	0.0885232	55.3384	16	12	Glyceraldehyde-3-phosphate dehydrogenase
UniRef90_Q13765	0.140227	0.300448	0.384671	0.22209	55.1876	3	3	Nascent polypeptide-associated complex subunit alpha
UniRef90_P46779	0.29798	0.29798	0.106557	0.0753472	55.1453	5	2	60S ribosomal protein L28
UniRef90_Q15019	0.286538	0.286538	0.259354	0.183391	54.9491	5	2	Septin-2
UniRef90_Q13418	0.272216	0.272216	0.172273	0.121815	54.7032	4	2	Integrin-linked protein kinase
UniRef90_P34932	0.116251	0.270556	0.319363	0.184384	54.6747	6	3	Heat shock 70 kDa protein 4
UniRef90_P36578	0.263207	0.263207	0.349664	0.24725	54.5484	4	2	60S ribosomal protein L4
UniRef90_P51665	0.256086	0.256086	0.0377647	0.0267037	54.426	2	2	26S proteasome non-ATPase regulatory subunit 7
UniRef90_P83731	0.241815	0.241815	0.133803	0.0946128	54.1805	2	2	60S ribosomal protein L24
UniRef90_P08133	0.296643	0.237864	0.373656	0.0964775	54.1126	22	15	Annexin A6
UniRef90_P61019	0.225794	0.237864	0.152271	0.0680975	54.1126	7	5	Ras-related protein Rab-2A
UniRef90_P00558	-0.10506	0.231091	1.02339	0.273512	53.996	21	14	Phosphoglycerate kinase 1
UniRef90_Q9NUQ9	0.230129	0.230129	0.250647	0.177234	53.9794	5	2	Protein FAM49B
UniRef90_P61981	0.222165	0.222165	0.046405	0.0328133	53.8422	2	2	14-3-3 protein gamma, N-terminally processed
UniRef90_P11940	0.2085	0.2085	0.0247533	0.0175032	53.6068	4	2	Polyadenylate-binding protein 1
UniRef90_P04632	0.201157	0.201157	0.0375266	0.0265353	53.4801	6	2	Calpain small subunit 1
UniRef90_P55072	0.108495	0.199255	0.368204	0.122735	53.4474	13	9	Transitional endoplasmic reticulum ATPase
UniRef90_P17987	0.274293	0.194295	0.254715	0.113912	53.3618	7	5	T-complex protein 1 subunit alpha
UniRef90_P20108	0.177011	0.177011	2.03653	1.44005	53.0635	3	2	Thioredoxin-dependent peroxide reductase, mitochondrial
UniRef90_Q14573	0.180365	0.173224	0.280624	0.140312	52.9981	9	4	Inositol 1,4,5-trisphosphate receptor type 3
UniRef90_P63104	0.17371	0.173002	0.138615	0.0400148	52.9943	18	12	14-3-3 protein zeta/delta
UniRef90_P06733	0.155254	0.166561	0.225734	0.0798089	52.8831	13	8	Alpha-enolase
UniRef90_Q6NWC3	0.148485	0.148485	0.564903	0.399447	52.5708	4	2	Ribosomal protein S2
UniRef90_Q15365	0.146211	0.146211	0.936529	0.662226	52.5315	4	2	Poly(rC)-binding protein 1
UniRef90_P62829	0.143935	0.143935	0.223857	0.158291	52.4921	2	2	60S ribosomal protein L23
UniRef90_Q62188	0.0160008	0.130456	0.805416	0.402708	52.2591	4	4	Dihydropyrimidinase-related protein 3
UniRef90_P47755	0.115985	0.115985	0.106084	0.0750127	52.0088	2	2	F-actin-capping protein subunit alpha-2
UniRef90_P07237	0.405656	0.110395	0.776753	0.274624	51.9121	9	8	Protein disulfide-isomerase
UniRef90_Q6TXE9	0.16623	0.106249	0.636522	0.284661	51.8403	9	5	LRRGT00050
UniRef90_Q8VBT0	0.277282	0.101598	0.525151	0.303196	51.7598	3	3	Thioredoxin-related transmembrane protein 1
UniRef90_P16615	0.248193	0.0954196	0.291426	0.168255	51.6529	4	3	Sarcoplasmic/endoplasmic reticulum calcium ATPase 2
UniRef90_P11142	0.0550776	0.0908029	0.339459	0.0778772	51.573	25	19	Heat shock cognate 71 kDa protein
UniRef90_P32969	0.0854698	0.0854698	0.0140711	0.00994978	51.4806	2	2	60S ribosomal protein L9
UniRef90_Q5XI32	0.125665	0.0836076	0.170125	0.0850625	51.4484	5	4	F-actin-capping protein subunit beta
UniRef90_P49368	-0.202532	0.0816138	0.90367	0.521734	51.4139	4	3	T-complex protein 1 subunit gamma
UniRef90_Q06830	0.0758368	0.077041	0.399273	0.17856	51.3347	5	5	Peroxiredoxin-1
UniRef90_P63000	0.0747619	0.0747619	0.00322319	0.00227914	51.2952	2	2	Ras-related C3 botulinum toxin substrate 1
UniRef90_P39023	0.0528029	0.0603973	0.0778531	0.0449485	51.0465	5	3	60S ribosomal protein L3
UniRef90_O60749	0.0592852	0.0592852	0.489553	0.346166	51.0272	3	2	Sorting nexin-2
UniRef90_P13020	0.0551698	0.0551698	0.779041	0.550865	50.9559	3	2	Gelsolin
UniRef90_Q9D154	0.048288	0.048288	0.826383	0.584341	50.8367	2	2	Leukocyte elastase inhibitor A
UniRef90_P09471	0.0482803	0.0482803	0.0885801	0.0626356	50.8366	2	2	Guanine nucleotide-binding protein G(o) subunit alpha
UniRef90_P18669	0.105213	0.0286958	0.441845	0.156216	50.4972	14	8	Phosphoglycerate mutase 1
UniRef90_P61978	-0.00584839	0.0174171	0.134595	0.0777086	50.3018	5	3	Heterogeneous nuclear ribonucleoprotein K
UniRef90_P09936	-0.289063	0.013043	0.822196	0.367697	50.226	8	5	Ubiquitin carboxyl-terminal hydrolase isozyme L1
UniRef90_Q9CPV4	0.00898602	0.00898602	0.262066	0.185309	50.1557	2	2	Glyoxalase domain-containing protein 4
UniRef90_P45974	0.00890273	0.00578235	0.173983	0.100449	50.1002	3	3	Ubiquitin carboxyl-terminal hydrolase 5
UniRef90_P22392	-0.0137635	0.00080114	0.0605708	0.0247279	50.0139	8	6	Nucleoside diphosphate kinase B
UniRef90_P52943	0	0	0	0	50	4	2	Cysteine-rich protein 2
UniRef90_Q16543	-0.00594817	-0.00594817	1.21338	0.85799	49.8969	3	2	Hsp90 co-chaperone Cdc37
UniRef90_P54714	-0.0193226	-0.0143553	0.0576703	0.0235438	49.7512	12	6	Triosephosphate isomerase
UniRef90_Q8K0T0	-0.0300513	-0.0296638	0.136899	0.0684496	49.486	6	4	Reticulon-1
UniRef90_P62854	-0.0297053	-0.0297053	0.133817	0.0946228	49.4853	2	2	40S ribosomal protein S26
UniRef90_P26638	-0.0356067	-0.0356067	0.00995266	0.00703759	49.383	2	2	Seryl-tRNA synthetase, cytoplasmic
UniRef90_Q9DCN2	-0.117723	-0.037958	0.277245	0.138623	49.3423	10	4	NADH-cytochrome b5 reductase 3 soluble form
UniRef90_P17252	-0.0425763	-0.0425763	0.0198092	0.0140072	49.2623	4	2	Protein kinase C alpha type
UniRef90_P42025	0.0164422	-0.0426443	0.405372	0.234042	49.2611	7	3	Beta-centractin
UniRef90_P60866	-0.0429978	-0.0429978	0.711308	0.502971	49.255	4	2	40S ribosomal protein S20
UniRef90_P61158	0.0206884	-0.0565835	0.195465	0.112852	49.0196	9	3	Actin-related protein 3
UniRef90_Q13561	-0.115371	-0.0601229	0.357183	0.145819	48.9583	10	6	Dynactin subunit 2
UniRef90_P15791	-0.301174	-0.0703893	0.511614	0.29538	48.7805	4	3	Calcium/calmodulin-dependent protein kinase type II subunit delta
UniRef90_P25787	-0.0710564	-0.0710564	0.166845	0.117977	48.7689	4	2	Proteasome subunit alpha type-2
UniRef90_Q15404	0.0521764	-0.0770972	0.282122	0.141061	48.6643	5	4	Ras suppressor protein 1
UniRef90_P22314	-0.0973065	-0.0840643	0.195068	0.112623	48.5437	7	3	Ubiquitin-like modifier-activating enzyme 1
UniRef90_P49720	-0.145773	-0.0840643	0.187302	0.108139	48.5437	7	3	Proteasome subunit beta type-3
UniRef90_Q9BW30	-0.0887081	-0.0976108	0.0995494	0.0445198	48.3092	7	5	Tubulin polymerization-promoting protein family member 3
UniRef90_P16638	-0.112631	-0.111031	0.494825	0.187026	48.0769	17	7	ATP-citrate synthase
UniRef90_Q01518	-0.0832382	-0.111031	0.0600237	0.0346547	48.0769	8	3	Adenylyl cyclase-associated protein 1
UniRef90_P20020	-0.116453	-0.116453	0.0846684	0.0598696	47.9831	2	2	Plasma membrane calcium-transporting ATPase 1
UniRef90_P62913	-0.124733	-0.128626	0.261452	0.130726	47.7726	5	4	60S ribosomal protein L11
UniRef90_P26373	-0.210862	-0.137504	0.452931	0.2615	47.619	7	3	60S ribosomal protein L13
UniRef90_P34067	-0.215876	-0.140716	0.267468	0.133734	47.5635	5	4	Proteasome subunit beta type-4
UniRef90_P48643	-0.148367	-0.148367	0.799496	0.565329	47.4313	3	2	T-complex protein 1 subunit epsilon
UniRef90_Q13885	-0.158826	-0.158826	0.164305	0.116181	47.2505	4	2	Tubulin beta-2A chain
UniRef90_P61247	-0.170651	-0.170651	0.181029	0.128007	47.0463	6	2	40S ribosomal protein S3a
UniRef90_P62258	-0.256649	-0.176323	0.206334	0.0572269	46.9484	19	13	14-3-3 protein epsilon
UniRef90_P20618	-0.192356	-0.192356	0.23163	0.163787	46.6716	5	2	Proteasome subunit beta type-1
UniRef90_Q8NHW5	-0.122359	-0.198343	0.639504	0.319752	46.5684	5	4	60S acidic ribosomal protein P0-like
UniRef90_O75874	-0.344686	-0.201634	0.88923	0.397676	46.5116	9	5	Isocitrate dehydrogenase [NADP] cytoplasmic
UniRef90_P62280	-0.16696	-0.201634	0.0600577	0.0346744	46.5116	4	3	40S ribosomal protein S11
UniRef90_P62917	-0.202724	-0.202724	0.540567	0.382239	46.4928	3	2	60S ribosomal protein L8
UniRef90_P08708	-0.225718	-0.225718	0.626934	0.443309	46.0966	2	2	40S ribosomal protein S17
UniRef90_P62750	-0.226456	-0.226456	0.0174387	0.012331	46.0839	2	2	60S ribosomal protein L23a
UniRef90_Q3U7R1	-0.256173	-0.226509	0.215955	0.124682	46.0829	6	3	Extended synaptotagmin-1
UniRef90_Q14204	-0.294038	-0.232648	0.514367	0.0813285	45.9772	81	40	Cytoplasmic dynein 1 heavy chain 1
UniRef90_P08758	-0.252043	-0.238787	0.107554	0.038026	45.8716	11	8	Annexin A5
UniRef90_P23396	0.331431	-0.238787	0.898293	0.401729	45.8716	8	5	40S ribosomal protein S3
UniRef90_P23284	-0.376297	-0.256392	0.593394	0.296697	45.5687	4	4	Peptidyl-prolyl cis-trans isomerase B
UniRef90_O00264	-0.271847	-0.271847	0.135092	0.0955241	45.3031	3	2	Membrane-associated progesterone receptor component 1
UniRef90_P62241	-0.286348	-0.286348	0.266914	0.188737	45.0542	6	2	40S ribosomal protein S8
UniRef90_P09525	-0.306907	-0.298611	0.0446972	0.0223486	44.8439	10	4	Annexin A4
UniRef90_P51572	-0.159959	-0.303486	0.788912	0.394456	44.7603	5	4	B-cell receptor-associated protein 31
UniRef90_P62937	-0.263333	-0.304405	0.232087	0.0947492	44.7446	14	6	Peptidyl-prolyl cis-trans isomerase A
UniRef90_Q920E5	-0.328043	-0.309918	0.143117	0.0715583	44.6501	5	4	Geranyltranstransferase
UniRef90_O95782	-0.310152	-0.310152	0.0329106	0.0232713	44.6461	4	2	AP-2 complex subunit alpha-1
UniRef90_P27595	-0.565424	-0.321928	0.945454	0.545858	44.4444	10	3	Hexokinase-1
UniRef90_Q9UPY8	-0.333242	-0.333242	0.0323881	0.0229018	44.2509	3	2	Microtubule-associated protein RP/EB family member 3
UniRef90_P41219	-1.00581	-0.356144	1.80872	1.04427	43.8596	11	3	Peripherin
UniRef90_Q9QZR6	-0.0664915	-0.367371	0.854741	0.323062	43.6681	11	7	Septin-9
UniRef90_P08228	-0.387302	-0.387302	0.845981	0.598199	43.3286	2	2	Superoxide dismutase [Cu-Zn]
UniRef90_P11021	-1.27105	-0.389567	1.681	0.970525	43.29	5	3	78 kDa glucose-regulated protein
UniRef90_Q6IRK8	-0.393049	-0.405982	0.316575	0.0746176	43.0109	47	18	Spna2 protein
UniRef90_P10809	-0.451234	-0.411426	0.255202	0.0964572	42.9185	15	7	60 kDa heat shock protein, mitochondrial
UniRef90_Q5RBL9	-0.189171	-0.411426	0.515088	0.297386	42.9185	5	3	Reticulon-3
UniRef90_P62847	-0.413462	-0.413462	1.44179	1.0195	42.8839	2	2	40S ribosomal protein S24
UniRef90_Q09666	-0.415193	-0.415193	4.01894	2.84182	42.8545	2	2	Neuroblast differentiation-associated protein AHNAK
UniRef90_Q14847	-0.447543	-0.443607	0.116137	0.0670516	42.3729	8	3	LIM and SH3 domain protein 1
UniRef90_P17174	-0.461479	-0.461479	0.280644	0.198445	42.0707	3	2	Aspartate aminotransferase, cytoplasmic
UniRef90_Q9P0L0	-0.496024	-0.469651	0.238134	0.0972179	41.9327	7	6	Vesicle-associated membrane protein-associated protein A
UniRef90_P18124	-0.475048	-0.475048	0.386665	0.273414	41.8416	3	2	60S ribosomal protein L7
UniRef90_Q00610	-0.401071	-0.475085	0.399909	0.0872674	41.841	43	21	Clathrin heavy chain 1
UniRef90_O09044	-0.476144	-0.476144	1.36068	0.962148	41.8231	3	2	Synaptosomal-associated protein 23
UniRef90_P62851	-0.478103	-0.478103	0.500313	0.353775	41.7901	2	2	40S ribosomal protein S25
UniRef90_P42766	-0.505855	-0.505855	0.0143684	0.01016	41.3229	2	2	60S ribosomal protein L35
UniRef90_P06745	-0.482669	-0.505891	0.0969592	0.0366471	41.3223	10	7	Glucose-6-phosphate isomerase
UniRef90_Q9UNX3	-0.597242	-0.536499	0.264441	0.13222	40.8089	7	4	60S ribosomal protein L26-like 1
UniRef90_P46778	-0.543382	-0.543382	1.09285	0.772764	40.6937	4	2	60S ribosomal protein L21
UniRef90_P08553	-0.593197	-0.594549	0.0765148	0.0441758	39.8406	4	3	Neurofilament medium polypeptide
UniRef90_P62249	-0.600987	-0.632268	0.165348	0.0954639	39.2157	3	3	40S ribosomal protein S16
UniRef90_Q9Z0F7	-0.654467	-0.632268	0.1018	0.0587745	39.2157	5	3	Gamma-synuclein
UniRef90_P30101	-0.69359	-0.650647	0.143572	0.0383712	38.9124	24	14	Protein disulfide-isomerase A3
UniRef90_Q04447	-0.179326	-0.650765	0.917745	0.529861	38.9105	6	3	Creatine kinase B-type
UniRef90_O88398	-0.87577	-0.670822	0.985148	0.492574	38.5805	5	4	Advillin
UniRef90_P27797	-0.64405	-0.695994	0.157926	0.0706268	38.1679	8	5	Calreticulin
UniRef90_P24268	-0.636475	-0.702887	0.550698	0.275349	38.0552	8	4	Cathepsin D 30 kDa heavy chain
UniRef90_P29401	-0.627406	-0.71238	0.392298	0.160155	37.9002	7	6	Transketolase
UniRef90_Q16181	-0.863162	-0.748461	0.495926	0.221785	37.3134	9	5	Septin-7
UniRef90_O08553	-0.670907	-0.757023	0.294695	0.0714739	37.1747	26	17	Dihydropyrimidinase-related protein 2
UniRef90_Q5ZHW4	-0.759695	-0.759695	2.38516	1.68656	37.1315	4	2	Ras-related protein Rab-5B
UniRef90_O60763	-0.764536	-0.764536	0.281341	0.198938	37.0532	4	2	General vesicular transport factor p115
UniRef90_Q80UE4	-0.942967	-0.782409	0.355567	0.205287	36.7647	5	3	Protein 4.1G
UniRef90_P51660	-0.788358	-0.788358	0.118067	0.0834858	36.6689	4	2	3-alpha,7-alpha,12-alpha-trihydroxy-5-beta-cholest-24-enoyl-CoA hydratase
UniRef90_Q15084	-0.756068	-0.807355	0.170965	0.0764577	36.3636	9	5	Protein disulfide-isomerase A6
UniRef90_Q64727	-0.755544	-0.815575	0.16412	0.058025	36.2319	25	8	Vinculin
UniRef90_P27824	-0.751981	-0.823749	0.452102	0.202186	36.1011	6	5	Calnexin
UniRef90_P70296	-0.8094	-0.823749	0.0551817	0.0318592	36.1011	4	3	Hippocampal cholinergic neurostimulating peptide
UniRef90_P70202	-0.826025	-0.826025	0.183892	0.130031	36.0647	3	2	Latexin
UniRef90_O95865	-0.923089	-0.863938	0.203272	0.0909061	35.461	10	5	N(G),N(G)-dimethylarginine dimethylaminohydrolase 2
UniRef90_P10637	-0.873859	-0.889903	0.150661	0.0753305	35.0502	8	4	Microtubule-associated protein tau
UniRef90_Q4G079	-0.738209	-0.891288	0.57723	0.235653	35.0283	6	6	Small inducible cytokine subfamily E, member 1
UniRef90_A0JPK2	-0.91529	-0.91529	1.42936	1.01071	34.6507	2	2	Proteasome subunit alpha type
UniRef90_P24270	-0.963123	-0.948601	0.0389005	0.0224592	34.1297	11	3	Catalase
UniRef90_Q68FX0	-1.0502	-0.963474	0.378626	0.2186	33.8983	5	3	Isocitrate dehydrogenase [NAD] subunit beta, mitochondrial
UniRef90_P21796	-1.19014	-1.02148	0.400106	0.151226	33.0033	10	7	Voltage-dependent anion-selective channel protein 1
UniRef90_Q07020	-1.02887	-1.03688	0.199338	0.099669	32.7678	5	4	60S ribosomal protein L18
UniRef90_P46459	-1.03725	-1.03725	1.09491	0.774218	32.762	3	2	Vesicle-fusing ATPase
UniRef90_O43301	-0.896511	-1.04492	0.350408	0.175204	32.6451	8	4	Heat shock 70 kDa protein 12A
UniRef90_Q9Y277	-1.0483	-1.0483	0.260726	0.184361	32.5936	2	2	Voltage-dependent anion-selective channel protein 3
UniRef90_P62277	-1.04956	-1.04956	0.0197135	0.0139395	32.5743	3	2	40S ribosomal protein S13
UniRef90_P09417	-1.06784	-1.05523	0.0989081	0.049454	32.4881	6	4	Dihydropteridine reductase
UniRef90_Q9Z2I0	-0.991836	-1.07013	0.233905	0.116953	32.262	6	4	LETM1 and EF-hand domain-containing protein 1, mitochondrial
UniRef90_Q8R127	-1.13879	-1.07039	0.261411	0.150926	32.2581	4	3	Probable saccharopine dehydrogenase
UniRef90_P55084	-1.10806	-1.10806	0.236103	0.16695	31.6902	3	2	3-ketoacyl-CoA thiolase
UniRef90_P07196	-1.11406	-1.11406	0.0424138	0.0299911	31.6002	7	2	Neurofilament light polypeptide
UniRef90_P04181	-1.13257	-1.13257	0.292133	0.206569	31.3235	3	2	Ornithine aminotransferase, renal form
UniRef90_P19096	-0.987723	-1.1375	0.529505	0.115547	31.25	43	21	Oleoyl-[acyl-carrier-protein] hydrolase
UniRef90_Q9BPU6	-0.921746	-1.16668	0.655167	0.327584	30.8171	7	4	Dihydropyrimidinase-related protein 5
UniRef90_Q05816	-1.09857	-1.18745	0.590455	0.241052	30.5111	9	6	Fatty acid-binding protein, epidermal
UniRef90_P31937	-1.20289	-1.20289	0.957166	0.676818	30.2847	3	2	3-hydroxyisobutyrate dehydrogenase, mitochondrial
UniRef90_P62424	-1.27978	-1.27978	1.29034	0.912412	29.1713	3	2	60S ribosomal protein L7a
UniRef90_P50136	-1.28865	-1.28865	0.377833	0.267168	29.0445	2	2	2-oxoisovalerate dehydrogenase subunit alpha, mitochondrial
UniRef90_P62888	-1.35069	-1.31034	0.295692	0.170718	28.7356	4	3	60S ribosomal protein L30
UniRef90_Q99798	-1.31331	-1.31331	0.257927	0.182382	28.6935	9	2	Aconitate hydratase, mitochondrial
UniRef90_P02088	-1.32992	-1.32992	0.0608614	0.0430355	28.4586	9	2	Hemoglobin subunit beta-1
UniRef90_P29419	-1.2536	-1.41143	0.807819	0.466394	27.3224	3	3	ATP synthase subunit e, mitochondrial
UniRef90_P19137	-1.11661	-1.41485	0.713649	0.356825	27.2753	13	4	Laminin subunit alpha-1
UniRef90_Q99623	-1.41641	-1.41641	0.726024	0.513376	27.2538	5	2	Prohibitin-2
UniRef90_P39019	-1.29051	-1.42761	0.52905	0.215984	27.1003	8	6	40S ribosomal protein S19
UniRef90_P62897	-1.43533	-1.43533	0.0414901	0.029338	26.9946	2	2	Cytochrome c, somatic
UniRef90_Q4V8F9	-1.44853	-1.44853	1.0517	0.743661	26.8147	3	2	Hydroxysteroid dehydrogenase-like protein 2
UniRef90_Q5XIC0	-1.46199	-1.46921	0.301183	0.150592	26.5343	6	4	Peroxisomal 3,2-trans-enoyl-CoA isomerase
UniRef90_B2RZ80	-1.47266	-1.47266	0.322124	0.227776	26.4877	4	2	Fis1 protein
UniRef90_P00367	-1.07402	-1.47508	1.13045	0.505553	26.455	9	5	Glutamate dehydrogenase 1, mitochondrial
UniRef90_P45880	-1.26572	-1.47508	0.685541	0.306583	26.455	7	5	Voltage-dependent anion-selective channel protein 2
UniRef90_P68371	-1.49042	-1.49042	0.0290451	0.020538	26.2487	3	2	Tubulin beta-2C chain
UniRef90_P49755	-1.49348	-1.49193	0.259529	0.129765	26.2285	4	4	Transmembrane emp24 domain-containing protein 10
UniRef90_P09622	-1.36387	-1.5131	0.485801	0.198327	25.9456	8	6	Dihydrolipoyl dehydrogenase, mitochondrial
UniRef90_P04844	-1.52102	-1.52102	0.0142182	0.0100538	25.8403	4	2	Dolichyl-diphosphooligosaccharide--protein glycosyltransferase subunit 2
UniRef90_P62269	-1.52217	-1.52217	0.226843	0.160402	25.8249	5	2	40S ribosomal protein S18
UniRef90_Q91WS0	-1.53478	-1.53478	0.18985	0.134244	25.6578	2	2	CDGSH iron sulfur domain-containing protein 1
UniRef90_Q921H8	-1.49957	-1.54102	0.166613	0.096194	25.5754	7	3	3-ketoacyl-CoA thiolase A, peroxisomal
UniRef90_P11047	-1.54983	-1.54983	0.142739	0.100932	25.4593	6	2	Laminin subunit gamma-1
UniRef90_Q00325	-1.39731	-1.5509	0.220034	0.0984022	25.4453	6	5	Phosphate carrier protein, mitochondrial
UniRef90_P55096	-1.5578	-1.5578	0.0519708	0.0367489	25.3547	2	2	ATP-binding cassette sub-family D member 3
UniRef90_B4E168	-1.48021	-1.57531	0.371517	0.214495	25.1256	5	3	Adenosylhomocysteinase
UniRef90_Q8R0F8	-1.62487	-1.62487	0.125613	0.0888215	24.4849	2	2	Fumarylacetoacetate hydrolase domain-containing protein 1
UniRef90_Q9QY76	-1.65037	-1.62761	0.167228	0.0965493	24.4499	4	3	Vesicle-associated membrane protein-associated protein B
UniRef90_P08249	-1.62146	-1.63227	0.247595	0.0825317	24.3902	12	9	Malate dehydrogenase, mitochondrial
UniRef90_Q99PU5	-1.6345	-1.6345	0.0229993	0.016263	24.3617	7	2	Long-chain-fatty-acid--CoA ligase ACSBG1
UniRef90_P00405	-1.6543	-1.6543	0.0777625	0.0549864	24.1097	3	2	Cytochrome c oxidase subunit 2
UniRef90_P31399	-1.69051	-1.69051	0.239652	0.169459	23.6535	2	2	ATP synthase subunit d, mitochondrial
UniRef90_Q3KR86	-1.34377	-1.69153	0.719895	0.415632	23.6407	4	3	Inner membrane protein, mitochondrial
UniRef90_Q8BMS1	-1.64096	-1.7137	0.304009	0.114905	23.3645	7	7	Long chain 3-hydroxyacyl-CoA dehydrogenase
UniRef90_Q9WTP7	-1.88582	-1.85997	0.298406	0.133451	21.5983	9	5	GTP:AMP phosphotransferase mitochondrial
UniRef90_P13804	-1.84672	-1.86575	0.0705876	0.0352938	21.5304	9	4	Electron transfer flavoprotein subunit alpha, mitochondrial
UniRef90_P19783	-1.96152	-1.87701	0.361437	0.180719	21.399	4	4	Cytochrome c oxidase subunit 4 isoform 1, mitochondrial
UniRef90_P62906	-1.87783	-1.87783	0.462353	0.326933	21.3893	3	2	60S ribosomal protein L10a
UniRef90_Q8QZT1	-1.89956	-1.94881	0.346816	0.173408	20.5737	4	4	Acetyl-CoA acetyltransferase, mitochondrial
UniRef90_P12235	-2.01974	-1.96347	0.182238	0.0814995	20.4082	6	5	ADP/ATP translocase 1
UniRef90_O35295	-1.88563	-1.99639	0.352961	0.203782	20.0401	6	3	Transcriptional activator protein Pur-beta
UniRef90_P06576	-2.02992	-2.0036	0.122782	0.0549098	19.9601	22	5	ATP synthase subunit beta, mitochondrial
UniRef90_P56571	-1.816	-2.02638	0.776632	0.317059	19.709	7	6	ES1 protein homolog, mitochondrial
UniRef90_P25705	-1.86539	-2.04555	0.955409	0.337788	19.4996	18	8	ATP synthase subunit alpha, mitochondrial
UniRef90_Q99714	-2.13892	-2.10821	0.52375	0.261875	18.8269	6	4	3-hydroxyacyl-CoA dehydrogenase type-2
UniRef90_Q8CAY6	-2.31106	-2.11437	0.744512	0.281399	18.7617	10	7	Acetyl-CoA acetyltransferase, cytosolic
UniRef90_Q96I99	-2.19571	-2.15355	0.269026	0.134513	18.3513	5	4	Succinyl-CoA ligase [GDP-forming] subunit beta, mitochondrial
UniRef90_Q9DB20	-2.06301	-2.15381	0.251984	0.145483	18.3486	8	3	ATP synthase subunit O, mitochondrial
UniRef90_P00505	-2.1848	-2.16329	0.312859	0.110612	18.2503	14	8	Aspartate aminotransferase, mitochondrial
UniRef90_P04904	-2.07425	-2.22033	0.468667	0.209594	17.6678	6	5	Glutathione S-transferase alpha-3
UniRef90_P08574	-2.0284	-2.26491	1.51799	0.758994	17.2228	6	4	Cytochrome c1, heme protein, mitochondrial
UniRef90_Q9DB77	-2.25387	-2.28983	0.749017	0.283102	16.9779	10	7	Cytochrome b-c1 complex subunit 2, mitochondrial
UniRef90_O43175	-2.48927	-2.34482	0.588987	0.208239	16.4475	11	8	D-3-phosphoglycerate dehydrogenase
UniRef90_P53007	-2.46434	-2.35896	0.510891	0.294963	16.3132	4	3	Tricarboxylate transport protein, mitochondrial
UniRef90_Q9Y6R1	-2.32976	-2.35914	0.454025	0.227013	16.3115	6	4	Electrogenic sodium bicarbonate cotransporter 1
UniRef90_P35435	-2.20595	-2.38405	0.334869	0.193337	16.0772	3	3	ATP synthase subunit gamma, mitochondrial
UniRef90_Q9CQQ7	-2.53554	-2.40327	0.444578	0.198821	15.8983	5	5	ATP synthase subunit b, mitochondrial
UniRef90_P48735	-2.43503	-2.42492	0.101319	0.0584968	15.6986	6	3	Isocitrate dehydrogenase [NADP], mitochondrial
UniRef90_P50993	-2.29712	-2.42761	1.44085	0.480282	15.674	14	9	Sodium/potassium-transporting ATPase subunit alpha-2
UniRef90_Q6PDU7	-2.50319	-2.43563	0.225641	0.130274	15.6006	3	3	ATP synthase, H+ transporting, mitochondrial F0 complex, subunit G
UniRef90_Q8BH95	-2.7302	-2.59932	0.292441	0.168841	14.1643	4	3	Enoyl-CoA hydratase, mitochondrial
UniRef90_P13086	-2.65665	-2.67129	0.0656039	0.0378764	13.5685	3	3	Succinyl-CoA ligase [GDP-forming] subunit alpha, mitochondrial
UniRef90_Q5QNW6	-2.85138	-2.85138	0.222896	0.157612	12.1701	4	2	Histone H2B type 2-F
UniRef90_P24473	-2.86393	-2.86393	0.00840779	0.00594521	12.0774	3	2	Glutathione S-transferase kappa 1
UniRef90_P10649	-3.25593	-2.93734	0.597194	0.34479	11.5473	12	3	Glutathione S-transferase Mu 1
UniRef90_P10412	-2.94162	-3.07553	1.16674	0.673619	10.6045	3	3	Histone H1.4
UniRef90_P12532	-3.27748	-3.27748	2.44873	1.73151	9.34877	3	2	Creatine kinase U-type, mitochondrial
UniRef90_Q8K442	-2.90364	-3.31227	1.76173	0.719223	9.14639	8	6	ATP-binding cassette sub-family A member 8-A
UniRef90_Q02252	-3.24341	-3.31232	0.497998	0.248999	9.14609	7	4	Methylmalonate-semialdehyde dehydrogenase [acylating], mitochondrial
UniRef90_Q64644	-3.31433	-3.31433	0.592592	0.419026	9.13454	8	2	Choline dehydrogenase (Fragment)
UniRef90_Q9JKC6	-3.36212	-3.36212	0.118986	0.0841357	8.86328	3	2	Cell cycle exit and neuronal differentiation protein 1
UniRef90_Q16836	-2.20932	-3.37851	2.49671	1.44147	8.77193	3	3	Hydroxyacyl-coenzyme A dehydrogenase, mitochondrial
UniRef90_O35409	-3.39168	-3.39168	2.68857	1.90111	8.69918	8	2	Glutamate carboxypeptidase 2
UniRef90_Q8BWT1	-3.5482	-3.44528	0.448333	0.224166	8.40855	9	4	3-ketoacyl-CoA thiolase, mitochondrial
UniRef90_Q00577	-3.16315	-3.52981	0.937304	0.382653	7.9682	9	6	Transcriptional activator protein Pur-alpha
UniRef90_Q16762	-3.14129	-3.62059	1.65585	0.956006	7.5188	7	3	Thiosulfate sulfurtransferase
UniRef90_P54869	-3.74766	-3.74766	2.69789	1.9077	6.92881	5	2	Hydroxymethylglutaryl-CoA synthase, mitochondrial
UniRef90_P06732	-4.00789	-4.00789	1.28494	0.908591	5.85216	3	2	Creatine kinase M-type
UniRef90_P62805	-4.54888	-4.50462	0.156237	0.0902036	4.21941	5	3	Histone H4
UniRef90_P02768	-6.42463	-5.23266	3.06362	1.37009	2.59067	9	5	Serum albumin

## Sheet: injury 48h
UniRef90	Mean	Median	Std Dev	Std Err	Incorporation (%)	N (all peptides)	N (quanti peptides)	Cluster Name
UniRef90_P15379	3.1606	4.20556	2.36598	1.366	94.8587	6	3	CD44 antigen
UniRef90_B5DF73	3.60926	3.60926	1.28731	0.910265	92.4264	6	2	Gbp5 protein (Fragment)
UniRef90_Q8R1F1	3.38086	3.47144	0.895292	0.365501	91.73	10	6	Niban-like protein 1
UniRef90_P21263	3.30319	3.38565	0.980879	0.185369	91.2676	75	28	Nestin
UniRef90_P35762	3.27811	3.32771	0.163627	0.0944702	90.9422	4	3	CD81 antigen
UniRef90_Q93045	3.00394	3.18442	0.373693	0.16712	90.0901	7	5	Stathmin-2
UniRef90_P06837	3.13667	3.15843	0.258726	0.149376	89.9281	9	3	Neuromodulin
UniRef90_Q0VBD0	3.1245	3.14561	0.278041	0.160527	89.8473	7	3	Integrin beta
UniRef90_Q8NFZ8	3.15779	3.07716	0.43501	0.177592	89.4062	12	6	Cell adhesion molecule 4
UniRef90_Q63663	2.74398	3.02327	1.6363	0.453828	89.0472	21	13	Interferon-induced guanylate-binding protein 2
UniRef90_P70232	2.99431	2.99431	1.57824	1.11599	88.8499	3	2	Processed neural cell adhesion molecule L1-like protein
UniRef90_P12268	2.95521	2.95521	0.478218	0.338151	88.5785	4	2	Inosine-5&apos;-monophosphate dehydrogenase 2
UniRef90_P62993	2.63076	2.63076	0.426528	0.301601	86.0986	2	2	Growth factor receptor-bound protein 2
UniRef90_Q99LJ0	2.58092	2.59074	1.15715	0.66808	85.7633	5	3	CTTNBP2 N-terminal-like protein
UniRef90_P10960	2.56201	2.56201	0.477564	0.337689	85.5183	2	2	Sulfated glycoprotein 1
UniRef90_P14873	2.14566	2.51457	1.32337	0.367037	85.1064	20	13	MAP1 light chain LC1
UniRef90_B9EHZ5	2.50025	2.50025	0.841691	0.595166	84.9801	2	2	Membrane protein, palmitoylated 6 (MAGUK p55 subfamily member 6)
UniRef90_Q9Y696	2.27049	2.45008	1.0808	0.325873	84.5309	15	11	Chloride intracellular channel protein 4
UniRef90_Q8R2Y2	2.39956	2.38853	1.42612	0.504209	83.9647	11	8	Cell surface glycoprotein MUC18
UniRef90_B1VKB4	1.86235	2.38082	1.7976	1.03784	83.8926	5	3	Synaptopodin
UniRef90_Q13492	2.2695	2.38082	0.433922	0.194056	83.8926	7	5	Phosphatidylinositol-binding clathrin assembly protein
UniRef90_P08226	2.13305	2.26534	1.24595	0.719349	82.7815	19	3	Apolipoprotein E
UniRef90_P40763	2.25854	2.25854	0.373777	0.2643	82.7141	2	2	Signal transducer and activator of transcription 3
UniRef90_P62988	2.26054	2.22446	0.108291	0.0442095	82.3737	7	6	Ubiquitin
UniRef90_Q60780	2.07368	2.13924	0.603141	0.227966	81.4996	12	7	Growth arrest-specific protein 7
UniRef90_O08564	2.12985	2.12985	1.24697	0.88174	81.4013	2	2	Lipid phosphate phosphohydrolase 1
UniRef90_Q64669	2.12633	2.12633	0.186807	0.132092	81.3644	2	2	NAD(P)H dehydrogenase [quinone] 1
UniRef90_O88447	2.02243	2.10791	0.46846	0.165626	81.17	9	8	Kinesin light chain 1
UniRef90_P50454	2.51956	2.10473	2.09589	0.855645	81.1362	15	6	Serpin H1
UniRef90_P37802	2.09992	2.05889	0.103453	0.0597285	80.6452	9	3	Transgelin-2
UniRef90_P31689	2.02442	2.02442	0.153413	0.108479	80.2694	8	2	DnaJ homolog subfamily A member 1
UniRef90_Q865V6	1.9885	1.9885	0	0	79.8722	3	2	Macrophage-capping protein
UniRef90_P10605	1.97224	1.97224	0.664654	0.469981	79.6904	8	2	Cathepsin B heavy chain
UniRef90_Q8WUM4	1.31252	1.97143	1.9875	0.888838	79.6813	10	5	Programmed cell death 6-interacting protein
UniRef90_O75955	1.46824	1.96578	1.03898	0.599858	79.6178	6	3	Flotillin-1
UniRef90_P60660	1.91537	1.91537	0.111539	0.0788697	79.0449	3	2	Myosin light polypeptide 6
UniRef90_Q9H444	1.05294	1.89432	1.59129	0.918733	78.8022	4	3	Charged multivesicular body protein 4b
UniRef90_Q8VI36-2	1.81929	1.8898	0.497321	0.20303	78.7498	8	6	Isoform Alpha of Paxillin
UniRef90_P35221	1.89281	1.84684	0.574597	0.173248	78.2473	16	11	Catenin alpha-1
UniRef90_Q63560	1.78735	1.83136	0.50145	0.289513	78.064	8	3	Microtubule-associated protein 6
UniRef90_P97706	1.79646	1.79646	2.99585	2.11839	77.647	4	2	Sodium channel
UniRef90_Q93050	1.78904	1.79586	0.279345	0.16128	77.6398	5	3	V-type proton ATPase 116 kDa subunit a isoform 1
UniRef90_Q12792	1.77058	1.77058	0.107849	0.076261	77.3341	5	2	Twinfilin-1
UniRef90_Q9DCL9	1.75882	1.75882	0.0172617	0.0122058	77.1909	3	2	Phosphoribosylaminoimidazole carboxylase
UniRef90_Q91ZU6	2.10889	1.75523	1.74063	0.870317	77.147	6	4	Bullous pemphigoid antigen 1, isoforms 1/2/3/4
UniRef90_Q63610	1.72553	1.72553	0.292502	0.20683	76.7821	8	2	Tropomyosin alpha-3 chain
UniRef90_Q924W2	1.72366	1.72366	0.918763	0.649663	76.759	3	2	Integrin alpha 6 subchain (Fragment)
UniRef90_P67809	1.72068	1.72068	0.354615	0.250751	76.7221	5	2	Nuclease-sensitive element-binding protein 1
UniRef90_Q63258	1.69235	1.69235	0.921191	0.65138	76.3696	8	2	Integrin alpha-7 light chain
UniRef90_P16330	1.58236	1.62149	0.584404	0.150892	75.4717	26	15	2&apos;,3&apos;-cyclic-nucleotide 3&apos;-phosphodiesterase
UniRef90_P10107	1.1894	1.60417	0.997586	0.3527	75.2488	10	8	Annexin A1
UniRef90_O15143	1.56653	1.58208	0.155358	0.0694784	74.9625	5	5	Actin-related protein 2/3 complex subunit 1B
UniRef90_Q91VI7	1.63295	1.57347	0.133517	0.0770861	74.8503	6	3	Ribonuclease inhibitor
UniRef90_Q15417	1.53611	1.55639	0.415059	0.115117	74.6269	20	13	Calponin-3
UniRef90_P13596	1.29473	1.55064	1.27542	0.403325	74.5513	12	10	Neural cell adhesion molecule 1
UniRef90_Q5I0G4	1.53935	1.53935	0.619073	0.437751	74.4025	2	2	Glycyl-tRNA synthetase (Fragment)
UniRef90_P13674	1.25314	1.53533	0.522137	0.301456	74.3494	5	3	Prolyl 4-hydroxylase subunit alpha-1
UniRef90_Q6UL10	1.58618	1.5327	0.70105	0.286203	74.3146	7	6	AHNAK (Fragment)
UniRef90_Q9QYR6	1.55565	1.52425	1.50088	0.750442	74.2027	8	4	MAP1 light chain LC2
UniRef90_Q86Y82	1.49259	1.49259	0.0545352	0.0385622	73.7804	4	2	Syntaxin-12
UniRef90_P35222	1.38133	1.486	0.572553	0.330563	73.692	12	3	Catenin beta-1
UniRef90_Q62465	0.726486	1.43453	1.72789	0.461798	72.9945	19	14	Synaptic vesicle membrane protein VAT-1 homolog
UniRef90_Q9H223	1.39038	1.39038	0.314319	0.222257	72.387	8	2	EH domain-containing protein 4
UniRef90_Q01581	1.37938	1.37938	0.560855	0.396585	72.2342	2	2	Hydroxymethylglutaryl-CoA synthase, cytoplasmic
UniRef90_P05556	1.42663	1.37707	0.253295	0.0957367	72.2022	11	7	Integrin beta-1
UniRef90_Q92597	0.79884	1.37333	1.54029	0.688837	72.1501	9	5	Protein NDRG1
UniRef90_B7ZLX0	1.45535	1.36959	0.683697	0.394733	72.0981	9	3	ITGAV protein
UniRef90_Q9CRD0	1.36837	1.36837	0.060568	0.042828	72.0809	3	2	OCIA domain-containing protein 1
UniRef90_Q14764	0.570147	1.36182	2.28837	0.723646	71.9895	22	10	Major vault protein
UniRef90_Q5R1W9	1.33172	1.35277	0.239529	0.0846864	71.8629	15	8	L-lactate dehydrogenase A chain
UniRef90_Q02750	1.02052	1.34232	1.73651	0.868257	71.7162	5	4	Dual specificity mitogen-activated protein kinase kinase 1
UniRef90_Q66HL2	1.17731	1.3257	0.624426	0.254921	71.4819	8	6	Cortactin
UniRef90_P08107	1.25298	1.32554	0.222853	0.128664	71.4796	3	3	Heat shock 70 kDa protein 1A/1B
UniRef90_P07825	1.32135	1.32135	0.084104	0.0594705	71.4204	2	2	Synaptophysin
UniRef90_Q5QD51	1.27784	1.3152	0.427993	0.135343	71.3333	14	10	A-kinase anchor protein 12
UniRef90_P35579	1.59375	1.30757	1.01168	0.21095	71.2251	33	23	Myosin-9
UniRef90_Q9ESN0	1.18501	1.30045	0.346901	0.0895693	71.1238	28	15	Protein Niban
UniRef90_Q62736	1.26664	1.29522	0.263822	0.0705095	71.0492	17	14	Non-muscle caldesmon
UniRef90_P43034	1.00624	1.27232	0.914657	0.373407	70.7217	10	6	Platelet-activating factor acetylhydrolase IB subunit alpha
UniRef90_P21333	1.22545	1.26882	0.515665	0.0768709	70.6714	67	45	Filamin-A
UniRef90_P11413	1.26355	1.25093	0.140984	0.0704918	70.4138	8	4	Glucose-6-phosphate 1-dehydrogenase
UniRef90_Q9Y490	1.08959	1.23447	0.669001	0.153479	70.1754	32	19	Talin-1
UniRef90_P23528	1.32018	1.23107	0.257653	0.0858844	70.1262	12	9	Cofilin-1
UniRef90_Q8CI51	0.921773	1.21669	0.989588	0.403998	69.917	8	6	PDZ and LIM domain protein 5
UniRef90_P67936	1.07339	1.2109	0.338908	0.195669	69.8324	5	3	Tropomyosin alpha-4 chain
UniRef90_O43396	1.1082	1.20091	0.312475	0.139743	69.6864	7	5	Thioredoxin-like protein 1
UniRef90_O00151	1.1784	1.1784	0.147636	0.104395	69.3557	3	2	PDZ and LIM domain protein 1
UniRef90_P07355	1.24481	1.17137	0.50739	0.0942199	69.2521	47	29	Annexin A2
UniRef90_P14618	1.13543	1.16977	0.294164	0.147082	69.2284	6	4	Pyruvate kinase isozymes M1/M2
UniRef90_P26645	1.19668	1.16527	0.52028	0.183947	69.162	10	8	Myristoylated alanine-rich C-kinase substrate
UniRef90_P55209	1.13976	1.152	0.312691	0.180532	68.9655	4	3	Nucleosome assembly protein 1-like 1
UniRef90_P14901	1.14344	1.14344	0.88059	0.622671	68.8383	7	2	Heme oxygenase 1
UniRef90_Q5SSZ5	1.211	1.1425	0.322432	0.161216	68.8244	6	4	Tensin-3
UniRef90_P51148	1.14079	1.14079	0.344769	0.243789	68.799	6	2	Ras-related protein Rab-5C
UniRef90_P33176	1.14513	1.13289	0.36116	0.136506	68.6813	12	7	Kinesin-1 heavy chain
UniRef90_P04075	1.2597	1.12029	0.516515	0.143255	68.4932	22	13	Fructose-bisphosphate aldolase A
UniRef90_P63241	1.0394	1.1159	0.62026	0.31013	68.4274	4	4	Eukaryotic translation initiation factor 5A-1
UniRef90_Q8BQ30	1.10878	1.10878	1.05851	0.748478	68.3207	2	2	Phostensin
UniRef90_O35685	1.19023	1.09935	0.231739	0.0946072	68.1791	6	6	Nuclear migration protein nudC
UniRef90_P35803	1.08894	1.08894	2.07529	1.46745	68.0223	2	2	Neuronal membrane glycoprotein M6-b
UniRef90_Q99P72	1.42411	1.08775	0.951724	0.237931	68.0044	19	16	Reticulon-4
UniRef90_Q9Y2X7	1.08544	1.08544	1.41963	1.00383	67.9695	4	2	ARF GTPase-activating protein GIT1
UniRef90_P49841	1.08337	1.08337	0.399511	0.282497	67.9383	2	2	Glycogen synthase kinase-3 beta
UniRef90_Q01082	1.01414	1.08314	0.63876	0.125271	67.9348	57	26	Spectrin beta chain, brain 1
UniRef90_P08238	1.03842	1.08163	0.326577	0.0872814	67.912	25	14	Heat shock protein HSP 90-beta
UniRef90_P19157	1.13825	1.07255	0.372447	0.152051	67.7746	10	6	Glutathione S-transferase P 1
UniRef90_Q9EPR5	1.01466	1.06794	0.308798	0.178284	67.7048	4	3	VPS10 domain-containing receptor SorCS2
UniRef90_Q15691	1.10792	1.06656	0.158073	0.0790365	67.6839	10	4	Microtubule-associated protein RP/EB family member 1
UniRef90_Q9JI55	0.888901	1.0322	0.637837	0.100851	67.1608	91	40	Plectin-1 (Fragment)
UniRef90_Q92783	1.02916	1.02916	0.00832772	0.00588858	67.1143	3	2	Signal transducing adapter molecule 1
UniRef90_O00410	0.277238	1.02621	1.61412	0.931915	67.0691	7	3	Importin-5
UniRef90_P07737	1.03076	1.02327	0.089736	0.0401312	67.0241	8	5	Profilin-1
UniRef90_Q9H492	1.01894	1.01894	0.0186049	0.0131556	66.9577	3	2	Microtubule-associated proteins 1A/1B light chain 3A
UniRef90_O00743	1.01862	1.01862	0.179579	0.126981	66.9529	2	2	Serine/threonine-protein phosphatase 6 catalytic subunit
UniRef90_P04899	1.00479	1.00479	0.263339	0.186209	66.7404	10	2	Guanine nucleotide-binding protein G(i) subunit alpha-2
UniRef90_Q8NC51	1.04069	0.999008	0.167692	0.0838461	66.6514	4	4	Plasminogen activator inhibitor 1 RNA-binding protein
UniRef90_O60884	0.997854	0.997854	0.0651808	0.0460898	66.6336	2	2	DnaJ homolog subfamily A member 2
UniRef90_Q9UNZ2	1.57475	0.988504	1.17936	0.680904	66.4894	9	3	NSFL1 cofactor p47
UniRef90_P11233	1.0191	0.965806	0.457239	0.22862	66.1379	5	4	Ras-related protein Ral-A
UniRef90_Q15041	0.956011	0.956011	0.709906	0.501979	65.9857	3	2	ADP-ribosylation factor-like protein 6-interacting protein 1
UniRef90_Q8VDM4	0.95249	0.95249	0.548128	0.387585	65.9309	5	2	26S proteasome non-ATPase regulatory subunit 2
UniRef90_Q13177	1.0688	0.948976	0.225089	0.0850755	65.8762	13	7	PAK-2p34
UniRef90_P21291	1.04278	0.910627	0.930818	0.380005	65.2761	9	6	Cysteine and glycine-rich protein 1
UniRef90_P51665	0.907374	0.907374	1.09975	0.77764	65.225	3	2	26S proteasome non-ATPase regulatory subunit 7
UniRef90_Q9UQ80	0.87187	0.897209	0.114506	0.0572532	65.065	7	4	Proliferation-associated protein 2G4
UniRef90_P41091	0.893522	0.893522	0.204331	0.144484	65.0069	2	2	Eukaryotic translation initiation factor 2 subunit 3
UniRef90_Q9R111	0.974735	0.878838	0.43376	0.177082	64.775	11	6	Guanine deaminase
UniRef90_Q5M7W5	0.916424	0.878321	0.300049	0.0688359	64.7668	27	19	Microtubule-associated protein 4
UniRef90_Q15365	0.871499	0.8615	0.0655553	0.0327776	64.5003	5	4	Poly(rC)-binding protein 1
UniRef90_P25189	0.849922	0.84426	0.666842	0.235764	64.2262	14	8	Myelin protein P0
UniRef90_O15144	0.829861	0.829861	0.827564	0.585176	63.9966	3	2	Actin-related protein 2/3 complex subunit 2
UniRef90_P62879	0.891158	0.826233	0.202607	0.0906084	63.9386	7	5	Guanine nucleotide-binding protein G(I)/G(S)/G(T) subunit beta-2
UniRef90_P40240	0.811657	0.823677	0.0813223	0.0469515	63.8978	4	3	CD9 antigen
UniRef90_P26640	0.821928	0.821928	1.66605	1.17807	63.8698	3	2	Valyl-tRNA synthetase
UniRef90_P30153	0.532634	0.821126	0.648754	0.290132	63.857	19	5	Serine/threonine-protein phosphatase 2A 65 kDa regulatory subunit A alpha isoform
UniRef90_B8QI33	0.813787	0.813787	0.469262	0.331818	63.7395	2	2	Liprin-alpha 1
UniRef90_P27635	0.81358	0.81358	0.0215152	0.0152135	63.7361	5	2	60S ribosomal protein L10
UniRef90_Q52NJ6	0.908501	0.789276	0.418998	0.171055	63.3459	10	6	Ras-related protein Rab-14
UniRef90_Q5F3N1	0.785577	0.785577	0.934188	0.660571	63.2863	2	2	Protein-L-isoaspartate(D-aspartate) O-methyltransferase
UniRef90_O08614	0.775854	0.775854	0.687346	0.486027	63.1296	8	2	Cytoskeletal protein
UniRef90_P37996	0.751028	0.751028	0.0669465	0.0473383	62.7282	3	2	ADP-ribosylation factor-like protein 3
UniRef90_Q9UN36	0.865778	0.744197	0.263505	0.152135	62.6174	4	3	Protein NDRG2
UniRef90_P13639	0.806598	0.727186	0.739622	0.197672	62.341	26	14	Elongation factor 2
UniRef90_Q9UDT6	0.0502293	0.724993	1.34241	0.775039	62.3053	6	3	CAP-Gly domain-containing linker protein 2
UniRef90_O00231	0.625127	0.715488	0.330808	0.116958	62.1504	11	8	26S proteasome non-ATPase regulatory subunit 11
UniRef90_Q9R063	0.709021	0.709021	0.254485	0.179948	62.0449	2	2	Peroxiredoxin-5, mitochondrial
UniRef90_P84095	0.692375	0.692375	0.189304	0.133858	61.7728	4	2	Rho-related GTP-binding protein RhoG
UniRef90_Q62417	0.73458	0.690242	0.175176	0.0875878	61.7379	9	4	Sorbin and SH3 domain-containing protein 1
UniRef90_O75083	0.54591	0.685014	0.375299	0.113157	61.6523	13	11	WD repeat-containing protein 1
UniRef90_P51149	0.419748	0.685014	0.647469	0.289557	61.6523	9	5	Ras-related protein Rab-7a
UniRef90_O43707	0.686344	0.68155	0.191164	0.0349017	61.5955	45	30	Alpha-actinin-4
UniRef90_Q61490	0.61937	0.664288	0.392346	0.175463	61.3121	6	5	CD166 antigen
UniRef90_P09671	0.716868	0.655172	0.223529	0.0999651	61.1621	6	5	Superoxide dismutase [Mn], mitochondrial
UniRef90_P37837	0.659274	0.655172	0.099052	0.0442974	61.1621	7	5	Transaldolase
UniRef90_Q9BW30	0.745708	0.653046	0.342389	0.13978	61.1271	7	6	Tubulin polymerization-promoting protein family member 3
UniRef90_P35611	0.558811	0.643856	0.381779	0.144299	60.9756	15	7	Alpha-adducin
UniRef90_Q15555	0.868557	0.637109	0.56869	0.254326	60.8643	9	5	Microtubule-associated protein RP/EB family member 2
UniRef90_Q14974	0.781512	0.634867	0.255938	0.147766	60.8273	6	3	Importin subunit beta-1
UniRef90_O54901	0.405811	0.632629	0.424631	0.245161	60.7903	4	3	OX-2 membrane glycoprotein
UniRef90_O70257	0.632395	0.632395	0.107482	0.0760015	60.7864	4	2	Syntaxin-7
UniRef90_Q9Y2A7	0.626431	0.626431	0.0535381	0.0378572	60.6878	3	2	Nck-associated protein 1
UniRef90_Q15907	0.71349	0.625934	0.208754	0.120524	60.6796	7	3	Ras-related protein Rab-11B
UniRef90_Q00169	0.737752	0.608232	0.328168	0.189468	60.3865	5	3	Phosphatidylinositol transfer protein alpha isoform
UniRef90_Q9CYZ2	0.606061	0.606061	0.0124219	0.00878364	60.3505	4	2	Tumor protein D54
UniRef90_P68104	0.62844	0.606035	0.138666	0.0358035	60.35	18	15	Elongation factor 1-alpha 1
UniRef90_P08670	0.534165	0.592919	0.261935	0.0409074	60.1323	93	41	Vimentin
UniRef90_P52565	0.518783	0.592919	0.369583	0.111433	60.1323	16	11	Rho GDP-dissociation inhibitor 1
UniRef90_Q00238	0.579569	0.579569	0.860037	0.608138	59.9102	2	2	Intercellular adhesion molecule 1
UniRef90_O15371	0.673874	0.575015	0.637009	0.318504	59.8344	5	4	Eukaryotic translation initiation factor 3 subunit D
UniRef90_P61978	0.264167	0.573467	0.546966	0.315791	59.8086	6	3	Heterogeneous nuclear ribonucleoprotein K
UniRef90_Q9QYB5	0.572803	0.572803	1.05942	0.749125	59.7975	4	2	Gamma-adducin
UniRef90_P21281	0.57701	0.564905	0.147082	0.084918	59.6659	7	3	V-type proton ATPase subunit B, brain isoform
UniRef90_Q62418	0.234692	0.564905	0.605977	0.349861	59.6659	5	3	Drebrin-like protein
UniRef90_P14602	0.587775	0.535332	0.127955	0.0572231	59.1716	9	5	Heat shock protein beta-1
UniRef90_Q6TXE9	0.468258	0.529073	0.821268	0.273756	59.0667	13	9	LRRGT00050
UniRef90_Q9BR76	0.432642	0.521616	0.402442	0.201221	58.9417	4	4	Coronin-1B
UniRef90_P10096	0.568009	0.516636	0.33054	0.0758312	58.8582	23	19	Glyceraldehyde-3-phosphate dehydrogenase
UniRef90_P32921	0.531815	0.510457	0.0768218	0.0443531	58.7544	4	3	T2-TrpRS
UniRef90_Q13765	0.359747	0.500218	0.520252	0.232664	58.5823	5	5	Nascent polypeptide-associated complex subunit alpha
UniRef90_P09936	0.337128	0.492079	0.7253	0.241767	58.4454	17	9	Ubiquitin carboxyl-terminal hydrolase isozyme L1
UniRef90_Q75WE7	0.639359	0.483985	0.277867	0.160427	58.309	5	3	von Willebrand factor A domain-containing protein 5A
UniRef90_Q96CW1	0.505547	0.479955	0.236594	0.136597	58.2411	7	3	AP-2 complex subunit mu
UniRef90_Q9R0P3	0.477418	0.477418	1.55613	1.10035	58.1983	2	2	S-formylglutathione hydrolase
UniRef90_Q8C052	0.476176	0.476176	0.26603	0.188112	58.1774	2	2	MAP1S light chain
UniRef90_P48643	0.390463	0.463947	0.155807	0.0696792	57.971	8	5	T-complex protein 1 subunit epsilon
UniRef90_P07237	0.68117	0.457326	1.02913	0.325441	57.8592	14	10	Protein disulfide-isomerase
UniRef90_Q96AC1	0.427671	0.455788	0.257098	0.128549	57.8332	7	4	Fermitin family homolog 2
UniRef90_P61981	0.4486	0.4486	0.0528977	0.0374043	57.7116	2	2	14-3-3 protein gamma, N-terminally processed
UniRef90_Q9QZR6	0.15977	0.440263	0.754842	0.285303	57.5705	11	7	Septin-9
UniRef90_Q12959	0.230791	0.438307	0.440379	0.254253	57.5374	4	3	Disks large homolog 1
UniRef90_Q9UNM6	0.323771	0.433531	1.96717	0.983585	57.4565	7	4	26S proteasome non-ATPase regulatory subunit 13
UniRef90_Q9HCJ6	0.432943	0.432943	0.399575	0.282542	57.4465	2	2	Synaptic vesicle membrane protein VAT-1 homolog-like
UniRef90_Q13885	0.431033	0.431033	0.0550074	0.0388961	57.4142	5	2	Tubulin beta-2A chain
UniRef90_O60749	0.283983	0.428412	0.399087	0.199544	57.3697	7	4	Sorting nexin-2
UniRef90_Q13561	0.0802749	0.426783	0.844138	0.422069	57.3421	9	4	Dynactin subunit 2
UniRef90_Q9H115	0.0517271	0.425761	0.90334	0.45167	57.3248	5	4	Beta-soluble NSF attachment protein
UniRef90_Q13418	0.0753142	0.422752	0.821115	0.367214	57.2738	6	5	Integrin-linked protein kinase
UniRef90_P34022	0.267549	0.41512	1.37493	0.687463	57.1443	5	4	Ran-specific GTPase-activating protein
UniRef90_Q9UPY8	0.414781	0.414781	0.255005	0.180316	57.1385	3	2	Microtubule-associated protein RP/EB family member 3
UniRef90_Q9NUQ9	0.390064	0.411155	0.210634	0.105317	57.0769	8	4	Protein FAM49B
UniRef90_P62834	0.26686	0.41075	0.409264	0.144697	57.0701	10	8	Ras-related protein Rap-1A
UniRef90_P17655	0.42265	0.409278	0.443842	0.256252	57.0451	6	3	Calpain-2 catalytic subunit
UniRef90_P50990	0.391417	0.409278	0.302641	0.10088	57.0451	13	9	T-complex protein 1 subunit theta
UniRef90_P62333	0.420883	0.405451	0.0931347	0.0537713	56.9801	9	3	26S protease regulatory subunit S10B
UniRef90_P62195	0.402659	0.402659	0.0202281	0.0143035	56.9326	5	2	26S protease regulatory subunit 8
UniRef90_O43242	0.364314	0.39973	0.140761	0.0812682	56.8828	8	3	26S proteasome non-ATPase regulatory subunit 3
UniRef90_P40227	0.116957	0.397404	0.709242	0.250755	56.8433	12	8	T-complex protein 1 subunit zeta
UniRef90_P00558	0.357779	0.38836	0.208219	0.0490777	56.6894	27	18	Phosphoglycerate kinase 1
UniRef90_P61019	0.375759	0.384584	0.124668	0.0557534	56.6251	8	5	Ras-related protein Rab-2A
UniRef90_Q14CZ8	0.380802	0.380802	0.558837	0.395158	56.5608	3	2	Hepatocyte cell adhesion molecule
UniRef90_P49368	0.491283	0.37146	0.307166	0.0926139	56.4016	21	11	T-complex protein 1 subunit gamma
UniRef90_P06733	0.406088	0.369638	0.151903	0.0480358	56.3705	14	10	Alpha-enolase
UniRef90_B7Z4T9	0.512507	0.369595	0.884654	0.294885	56.3698	16	9	cDNA FLJ54074, highly similar to T-complex protein 1 subunit eta
UniRef90_Q92890	0.362306	0.362306	0.934744	0.660964	56.2455	2	2	Ubiquitin fusion degradation protein 1 homolog
UniRef90_Q9Y6G9	0.278585	0.360572	1.14154	0.466031	56.2159	11	6	Cytoplasmic dynein 1 light intermediate chain 1
UniRef90_P50991	0.420236	0.359486	0.153713	0.0627532	56.1974	13	6	T-complex protein 1 subunit delta
UniRef90_Q920E5	0.478693	0.356606	0.546906	0.206711	56.1482	8	7	Geranyltranstransferase
UniRef90_Q01518	0.269357	0.354759	0.215649	0.0964412	56.1167	6	5	Adenylyl cyclase-associated protein 1
UniRef90_P16638	0.288347	0.325539	0.803572	0.194895	55.6174	28	17	ATP-citrate synthase
UniRef90_Q6IAA8	0.324186	0.324186	0.761286	0.538311	55.5942	2	2	RhoA activator C11orf59
UniRef90_Q7KZF4	0.312355	0.312355	0.110153	0.0778899	55.3917	6	2	Staphylococcal nuclease domain-containing protein 1
UniRef90_P50502	-0.189698	0.311176	1.3463	0.673148	55.3715	6	4	Hsc70-interacting protein
UniRef90_P52209	0.230006	0.307573	0.310954	0.139063	55.3097	6	5	6-phosphogluconate dehydrogenase, decarboxylating
UniRef90_P63000	0.329729	0.304006	0.134597	0.050873	55.2486	8	7	Ras-related C3 botulinum toxin substrate 1
UniRef90_P28066	0.291386	0.291386	0.492103	0.347969	55.0322	5	2	Proteasome subunit alpha type-5
UniRef90_P52943	0.0131505	0.28279	0.580393	0.259559	54.8847	7	5	Cysteine-rich protein 2
UniRef90_P63244	0.455238	0.272504	0.53301	0.2176	54.7081	9	6	Guanine nucleotide-binding protein subunit beta-2-like 1
UniRef90_P08133	0.234984	0.267948	1.15436	0.210756	54.6299	41	30	Annexin A6
UniRef90_P11352	0.266694	0.266694	0.052767	0.0373119	54.6083	4	2	Glutathione peroxidase 1
UniRef90_Q5XI32	0.188739	0.259295	0.527391	0.186461	54.4812	11	8	F-actin-capping protein subunit beta
UniRef90_Q99MN1	-0.160559	0.2567	0.733233	0.423332	54.4366	5	3	Lysyl-tRNA synthetase
UniRef90_P61158	0.839942	0.248112	1.56369	0.638372	54.2889	8	6	Actin-related protein 3
UniRef90_P62820	0.343752	0.237864	0.326526	0.146027	54.1126	5	5	Ras-related protein Rab-1A
UniRef90_P63104	0.264142	0.227692	0.126651	0.0351266	53.9374	20	13	14-3-3 protein zeta/delta
UniRef90_P15791	0.223725	0.223725	0.174901	0.123674	53.8691	3	2	Calcium/calmodulin-dependent protein kinase type II subunit delta
UniRef90_Q8VBT0	0.22355	0.22355	0.185558	0.13121	53.8661	3	2	Thioredoxin-related transmembrane protein 1
UniRef90_P38646	-0.0182526	0.22095	0.721162	0.240387	53.8213	16	9	Stress-70 protein, mitochondrial
UniRef90_P22314	0.232975	0.218925	0.216242	0.108121	53.7864	9	4	Ubiquitin-like modifier-activating enzyme 1
UniRef90_P02545	0.197946	0.217591	0.231393	0.133595	53.7634	5	3	Lamin-A/C
UniRef90_P11142	0.339188	0.212569	0.771696	0.145837	53.6769	35	28	Heat shock cognate 71 kDa protein
UniRef90_P17987	0.118801	0.212568	0.322717	0.144323	53.6769	14	5	T-complex protein 1 subunit alpha
UniRef90_P04632	0.205836	0.205836	0.195016	0.137897	53.5608	5	2	Calpain small subunit 1
UniRef90_P13796	0.164443	0.20474	0.300143	0.106116	53.5419	10	8	Plastin-2
UniRef90_Q9DAU1	0.202105	0.202105	0.0457644	0.0323603	53.4965	3	2	Protein canopy homolog 3
UniRef90_Q8BXZ1	0.163342	0.194295	0.771261	0.445288	53.3618	4	3	Protein disulfide-isomerase TMX3
UniRef90_P61160	-0.372352	0.189351	1.1547	0.666667	53.2765	6	3	Actin-related protein 2
UniRef90_P78371	0.140289	0.183633	0.216574	0.0884159	53.1778	9	6	T-complex protein 1 subunit beta
UniRef90_P55072	0.292842	0.181149	0.634702	0.176035	53.135	26	13	Transitional endoplasmic reticulum ATPase
UniRef90_P30416	0.177993	0.177993	0.183254	0.12958	53.0805	4	2	FK506-binding protein 4, N-terminally processed
UniRef90_P09471	0.172232	0.172232	0.438033	0.309736	52.981	2	2	Guanine nucleotide-binding protein G(o) subunit alpha
UniRef90_P47755	0.0261954	0.169745	0.40422	0.180773	52.9381	7	5	F-actin-capping protein subunit alpha-2
UniRef90_P63010	0.185722	0.168998	0.202286	0.0825827	52.9252	7	6	AP-2 complex subunit beta
UniRef90_P27321	0.163529	0.163529	1.00338	0.709498	52.8307	5	2	Calpastatin
UniRef90_P26453	0.257706	0.162846	0.320458	0.160229	52.8189	7	4	Basigin
UniRef90_Q8R3B1	0.161948	0.161948	0.24933	0.176303	52.8034	6	2	1-phosphatidylinositol-4,5-bisphosphate phosphodiesterase delta-1
UniRef90_P62917	0.157627	0.157627	0.0682622	0.0482687	52.7288	4	2	60S ribosomal protein L8
UniRef90_P61088	0.157366	0.157366	0.22255	0.157366	52.7242	3	2	Ubiquitin-conjugating enzyme E2 N
UniRef90_P54714	0.223495	0.150401	0.209288	0.0631028	52.6039	17	11	Triosephosphate isomerase
UniRef90_P18669	0.204211	0.140826	0.321569	0.0969568	52.4384	15	11	Phosphoglycerate mutase 1
UniRef90_Q9NZR1	0.0922796	0.131313	0.147089	0.084922	52.2739	6	3	Tropomodulin-2
UniRef90_Q9H0U4	0.130917	0.130917	0.0826385	0.0584342	52.2671	2	2	Ras-related protein Rab-1B
UniRef90_O14818	0.0496941	0.128156	0.186762	0.107827	52.2193	5	3	Proteasome subunit alpha type-7
UniRef90_Q62884	0.119298	0.119298	0.719643	0.508865	52.0661	4	2	Vascular protein tyrosine phosphatase 1
UniRef90_P54577	0.116571	0.116571	0.225164	0.159215	52.0189	5	2	Tyrosyl-tRNA synthetase, cytoplasmic
UniRef90_P49721	0.108641	0.108641	0.0186985	0.0132218	51.8817	3	2	Proteasome subunit beta type-2
UniRef90_P62753	0.105987	0.10846	0.0704214	0.0352107	51.8786	5	4	40S ribosomal protein S6
UniRef90_Q15404	-0.0533598	0.106257	0.612178	0.249921	51.8405	10	6	Ras suppressor protein 1
UniRef90_P26638	0.114831	0.0977551	0.103217	0.0516084	51.6933	7	4	Seryl-tRNA synthetase, cytoplasmic
UniRef90_P32969	0.0568055	0.0933329	0.127081	0.0635404	51.6168	5	4	60S ribosomal protein L9
UniRef90_Q9D154	0.0506164	0.0908029	0.166394	0.0744139	51.573	9	5	Leukocyte elastase inhibitor A
UniRef90_P31948	0.506544	0.0816138	1.2075	0.456392	51.4139	8	7	Stress-induced-phosphoprotein 1
UniRef90_Q9NTK5	0.0718298	0.0718298	0.0246604	0.0174375	51.2445	2	2	Obg-like ATPase 1
UniRef90_P41105	0.0713348	0.0603973	0.387259	0.223584	51.0465	5	3	60S ribosomal protein L28
UniRef90_P13471	0.0524806	0.0524806	0.212261	0.150091	50.9093	4	2	40S ribosomal protein S14
UniRef90_P22392	0.00240284	0.0499049	0.218639	0.0826379	50.8647	7	7	Nucleoside diphosphate kinase B
UniRef90_P25786	-0.174044	0.0492142	0.534672	0.267336	50.8527	7	4	Proteasome subunit alpha type-1
UniRef90_Q86VP6	-0.170197	0.0443958	0.408931	0.166945	50.7693	6	6	Cullin-associated NEDD8-dissociated protein 1
UniRef90_P25789	-0.43075	0.0394883	0.882599	0.509569	50.6842	3	3	Proteasome subunit alpha type-4
UniRef90_P08228	0.802959	0.0385205	2.14477	1.07238	50.6675	8	4	Superoxide dismutase [Cu-Zn]
UniRef90_Q9HB71	0.0647928	0.0350469	0.138663	0.0800572	50.6073	4	3	Calcyclin-binding protein
UniRef90_P06745	0.0815482	0.034567	0.314201	0.099359	50.599	13	10	Glucose-6-phosphate isomerase
UniRef90_P60900	0.0408221	0.0320936	0.0387003	0.0223436	50.5561	6	3	Proteasome subunit alpha type-6
UniRef90_Q9DCN2	-0.0290466	0.0232698	0.37226	0.16648	50.4032	10	5	NADH-cytochrome b5 reductase 3 soluble form
UniRef90_Q14204	0.049561	0.0218044	0.534214	0.0779231	50.3778	80	47	Cytoplasmic dynein 1 heavy chain 1
UniRef90_P49720	-0.00707729	0.0203404	0.200892	0.0898417	50.3525	7	5	Proteasome subunit beta type-3
UniRef90_O00232	-0.0123088	-0.0123088	0.404959	0.28635	49.7867	5	2	26S proteasome non-ATPase regulatory subunit 12
UniRef90_P08865	-0.0173896	-0.0173896	0.0554286	0.0391939	49.6987	8	2	40S ribosomal protein SA
UniRef90_P16615	-0.0275701	-0.0275701	0.0410312	0.0290135	49.5223	2	2	Sarcoplasmic/endoplasmic reticulum calcium ATPase 2
UniRef90_P31939	-0.0275701	-0.0275701	0.118032	0.0834613	49.5223	5	2	IMP cyclohydrolase
UniRef90_P09417	0.0349074	-0.0285692	0.374477	0.167471	49.505	6	5	Dihydropteridine reductase
UniRef90_P46778	-0.0112799	-0.0285692	0.0961485	0.0555114	49.505	3	3	60S ribosomal protein L21
UniRef90_Q15019	-0.0766301	-0.0306462	0.220823	0.110412	49.469	14	4	Septin-2
UniRef90_Q9CPV4	-0.0311438	-0.0311438	0.205314	0.145179	49.4603	3	2	Glyoxalase domain-containing protein 4
UniRef90_P61247	-0.157532	-0.0565835	0.314032	0.0946842	49.0196	18	11	40S ribosomal protein S3a
UniRef90_Q96AG4	-0.0565835	-0.0565835	0.423642	0.29956	49.0196	3	2	Leucine-rich repeat-containing protein 59
UniRef90_Q6NWC3	-0.0838074	-0.0838074	0.0385004	0.0272239	48.5481	5	2	Ribosomal protein S2
UniRef90_P27361	-0.0808952	-0.0840643	0.171673	0.0991153	48.5437	7	3	Mitogen-activated protein kinase 3
UniRef90_Q64331	-0.0899784	-0.0899784	0.869591	0.614894	48.4413	3	2	Myosin-VI
UniRef90_P62910	-0.102352	-0.102352	0.175584	0.124156	48.2271	2	2	60S ribosomal protein L32
UniRef90_P97891	-0.102446	-0.102446	0.104478	0.0738768	48.2255	6	2	Translin
UniRef90_P39023	-0.104321	-0.104321	0.00948974	0.00671026	48.193	4	2	60S ribosomal protein L3
UniRef90_P25787	-0.625752	-0.104371	1.2068	0.603398	48.1922	8	4	Proteasome subunit alpha type-2
UniRef90_P11021	-0.0425092	-0.111031	0.249862	0.144258	48.0769	5	3	78 kDa glucose-regulated protein
UniRef90_Q06830	-0.137324	-0.111031	0.17664	0.053259	48.0769	12	11	Peroxiredoxin-1
UniRef90_A4D1M6	-0.117625	-0.117625	0.25602	0.181034	47.9628	2	2	HCG19809
UniRef90_Q05816	0.546361	-0.122431	2.04162	1.02081	47.8797	10	4	Fatty acid-binding protein, epidermal
UniRef90_P22090	-0.125481	-0.125481	0.177457	0.125481	47.827	4	2	40S ribosomal protein S4, Y isoform 1
UniRef90_P62937	-0.157261	-0.130916	0.0995766	0.0352057	47.733	17	8	Peptidyl-prolyl cis-trans isomerase A
UniRef90_P62241	-0.136012	-0.136012	0.0928039	0.0656223	47.6448	4	2	40S ribosomal protein S8
UniRef90_P24268	0.0163376	-0.137504	0.686286	0.259392	47.619	10	7	Cathepsin D 30 kDa heavy chain
UniRef90_Q6P9U0	-0.134953	-0.137504	0.105132	0.060698	47.619	4	3	Serine (Or cysteine) peptidase inhibitor, clade B, member 6a
UniRef90_P62829	-0.155751	-0.156913	0.0705638	0.0352819	47.2836	4	4	60S ribosomal protein L23
UniRef90_P62280	-0.698941	-0.163499	1.30134	0.581975	47.1698	6	5	40S ribosomal protein S11
UniRef90_Q80UE4	-0.584687	-0.163499	0.900171	0.519714	47.1698	5	3	Protein 4.1G
UniRef90_P23396	0.0139892	-0.176266	0.719765	0.254475	46.9493	11	8	40S ribosomal protein S3
UniRef90_P08758	-0.246952	-0.176323	0.360907	0.14734	46.9484	11	6	Annexin A5
UniRef90_P61204	-0.1057	-0.176323	0.258868	0.149457	46.9484	5	3	ADP-ribosylation factor 3
UniRef90_P26373	-0.595323	-0.189034	0.748783	0.43231	46.729	8	3	60S ribosomal protein L13
UniRef90_P85973	-0.20918	-0.189034	0.0584202	0.0337289	46.729	11	3	Purine nucleoside phosphorylase
UniRef90_P09525	-0.18481	-0.195334	0.0639808	0.0319904	46.6203	7	4	Annexin A4
UniRef90_P17439	-0.323858	-0.201634	0.64525	0.372536	46.5116	3	3	Glucosylceramidase
UniRef90_O75369	0.0306021	-0.214125	1.26841	0.732316	46.2963	10	3	Filamin-B
UniRef90_P27797	0.0143905	-0.214125	0.8079	0.285636	46.2963	11	8	Calreticulin
UniRef90_Q9Z0F7	-0.178992	-0.214125	0.0831295	0.0479948	46.2963	6	3	Gamma-synuclein
UniRef90_P45974	-0.22445	-0.22445	0.217875	0.154061	46.1184	2	2	Ubiquitin carboxyl-terminal hydrolase 5
UniRef90_P62913	-0.0190781	-0.226509	0.423304	0.244394	46.0829	4	3	60S ribosomal protein L11
UniRef90_Q5RBL9	-0.14443	-0.226509	0.294872	0.170245	46.0829	5	3	Reticulon-3
UniRef90_Q9UHB9	-0.23045	-0.23045	0.112982	0.0798902	46.0151	3	2	Signal recognition particle 68 kDa protein
UniRef90_P28838	-0.238735	-0.238735	0.0172909	0.0122265	45.8725	6	2	Cytosol aminopeptidase
UniRef90_P42766	-0.126499	-0.244258	0.308228	0.154114	45.7774	4	4	60S ribosomal protein L35
UniRef90_P62847	-0.248461	-0.248461	0.120155	0.0849625	45.7051	3	2	40S ribosomal protein S24
UniRef90_P60866	-0.24273	-0.255481	0.141913	0.0709565	45.5844	5	4	40S ribosomal protein S20
UniRef90_Q68FX0	-0.265295	-0.265295	0.505773	0.357635	45.4157	3	2	Isocitrate dehydrogenase [NAD] subunit beta, mitochondrial
UniRef90_P17252	-0.375455	-0.275007	0.477612	0.275749	45.2489	5	3	Protein kinase C alpha type
UniRef90_Q6IRK8	-0.298345	-0.286881	0.276754	0.0577072	45.045	54	23	Spna2 protein
UniRef90_Q9WUA3	-0.297513	-0.297513	0.5254	0.371514	44.8627	3	2	6-phosphofructokinase type C
UniRef90_P45376	-0.30444	-0.298658	0.093341	0.0538904	44.843	5	3	Aldose reductase
UniRef90_Q15084	0.392546	-0.298658	1.2374	0.714414	44.843	10	3	Protein disulfide-isomerase A6
UniRef90_Q14847	-0.34708	-0.30653	0.276808	0.138404	44.7081	9	4	LIM and SH3 domain protein 1
UniRef90_P70296	-0.306813	-0.306813	0.295857	0.209202	44.7033	3	2	Hippocampal cholinergic neurostimulating peptide
UniRef90_P62249	-0.317573	-0.31034	0.0466048	0.0269073	44.6429	7	3	40S ribosomal protein S16
UniRef90_P08003	-0.312776	-0.312776	0.139513	0.0986507	44.6011	3	2	Protein disulfide-isomerase A4
UniRef90_P31150	-0.513443	-0.321928	0.939326	0.420079	44.4444	11	5	Rab GDP dissociation inhibitor alpha
UniRef90_P30101	-0.301264	-0.333424	0.219657	0.0479332	44.2478	33	21	Protein disulfide-isomerase A3
UniRef90_Q9UNX3	-0.344621	-0.333424	0.0299075	0.0172671	44.2478	7	3	60S ribosomal protein L26-like 1
UniRef90_O00429	-0.338856	-0.338856	0.040327	0.0285155	44.1549	7	2	Dynamin-1-like protein
UniRef90_P61313	-0.347475	-0.344828	0.264744	0.15285	44.0529	5	3	60S ribosomal protein L15
UniRef90_Q8K0T0	-0.355175	-0.355175	0.481991	0.340819	43.8762	3	2	Reticulon-1
UniRef90_Q00610	-0.3023	-0.372855	0.212515	0.0475198	43.5746	36	20	Clathrin heavy chain 1
UniRef90_Q9EQ06	-0.376289	-0.376289	0.211821	0.14978	43.5161	2	2	Estradiol 17-beta-dehydrogenase 11
UniRef90_P10637	-0.640933	-0.389567	0.653349	0.292186	43.29	9	5	Microtubule-associated protein tau
UniRef90_O00159	-0.398349	-0.398349	2.55908	1.80954	43.1407	5	2	Myosin-Ic
UniRef90_P08553	-0.33736	-0.400538	0.385196	0.222393	43.1034	5	3	Neurofilament medium polypeptide
UniRef90_P30050	-0.401241	-0.401241	0.429398	0.303631	43.0915	2	2	60S ribosomal protein L12
UniRef90_P62899	-0.388771	-0.411426	0.0588806	0.0339947	42.9185	3	3	60S ribosomal protein L31
UniRef90_O08795	-0.401044	-0.422233	0.116891	0.0674872	42.735	3	3	Glucosidase 2 subunit beta
UniRef90_Q91VG6	-0.42899	-0.42899	0.151409	0.107062	42.6205	2	2	Chchd3 protein (Fragment)
UniRef90_Q9P0L0	-0.436371	-0.431969	0.209535	0.0855424	42.57	8	6	Vesicle-associated membrane protein-associated protein A
UniRef90_Q62188	-0.437811	-0.437811	0.0527127	0.0372735	42.471	4	2	Dihydropyrimidinase-related protein 3
UniRef90_Q6NUK1	-0.447729	-0.447729	0.0822536	0.0581621	42.3031	3	2	Calcium-binding mitochondrial carrier protein SCaMC-1
UniRef90_Q9UNS2	-2.33313	-0.454176	3.60426	2.08092	42.1941	5	3	COP9 signalosome complex subunit 3
UniRef90_Q6TUD1	-0.472935	-0.472935	1.53835	1.08778	41.8773	8	2	LRRGT00113
UniRef90_P23284	-0.607131	-0.481737	0.767461	0.313315	41.7288	8	6	Peptidyl-prolyl cis-trans isomerase B
UniRef90_Q99KB8	-0.487485	-0.487485	0.369076	0.260976	41.632	4	2	Hydroxyacylglutathione hydrolase, mitochondrial
UniRef90_Q64727	-0.467239	-0.48983	0.386335	0.0863871	41.5925	43	20	Vinculin
UniRef90_P13020	-0.404035	-0.490122	0.197784	0.0807449	41.5876	10	6	Gelsolin
UniRef90_P34897	-0.0694978	-0.495695	0.908973	0.524796	41.4938	5	3	Serine hydroxymethyltransferase, mitochondrial
UniRef90_Q9R1J0	-0.496457	-0.496457	0.564053	0.398846	41.481	2	2	Sterol-4-alpha-carboxylate 3-dehydrogenase, decarboxylating
UniRef90_P11047	-0.501657	-0.501657	1.21638	0.860111	41.3935	3	2	Laminin subunit gamma-1
UniRef90_P54920	-0.502046	-0.502046	2.17378	1.53709	41.387	4	2	Alpha-soluble NSF attachment protein
UniRef90_P19137	0.0806254	-0.516015	1.41758	0.818438	41.1523	5	3	Laminin subunit alpha-1
UniRef90_Q07020	-0.509051	-0.516015	0.0310749	0.0179411	41.1523	7	3	60S ribosomal protein L18
UniRef90_O08553	-0.489731	-0.520832	0.197877	0.0442466	41.0714	38	20	Dihydropyrimidinase-related protein 2
UniRef90_P49006	-0.520933	-0.520933	0.935868	0.661759	41.0697	2	2	MARCKS-related protein
UniRef90_O60282	-0.52438	-0.52438	2.99739	2.11948	41.0119	2	2	Kinesin heavy chain isoform 5C
UniRef90_P54136	-0.575717	-0.526069	0.615089	0.355122	40.9836	4	3	Arginyl-tRNA synthetase, cytoplasmic
UniRef90_Q96KP4	-0.531751	-0.531751	0.75201	0.531751	40.8884	2	2	Cytosolic non-specific dipeptidase
UniRef90_Q9Y4L1	-0.534645	-0.534645	0.350391	0.247764	40.8399	2	2	Hypoxia up-regulated protein 1
UniRef90_O88398	-0.981568	-0.540942	0.969595	0.484797	40.7345	4	4	Advillin
UniRef90_P27824	-0.350196	-0.545833	0.939516	0.332169	40.6527	12	8	Calnexin
UniRef90_O35350	-0.546479	-0.546479	0.807821	0.571216	40.6419	4	2	Calpain-1 catalytic subunit
UniRef90_Q9UNH7	-0.546591	-0.546591	0.890576	0.629732	40.64	2	2	Sorting nexin-6
UniRef90_O60763	-0.555516	-0.555516	0.173321	0.122556	40.4908	2	2	General vesicular transport factor p115
UniRef90_P24270	-0.536849	-0.555816	0.0811101	0.0405551	40.4858	9	4	Catalase
UniRef90_P51572	-0.545423	-0.555816	0.129114	0.0745442	40.4858	5	3	B-cell receptor-associated protein 31
UniRef90_P10809	-0.89474	-0.560508	0.717933	0.22703	40.4075	15	10	60 kDa heat shock protein, mitochondrial
UniRef90_P46782	-0.42731	-0.565597	0.299123	0.172699	40.3226	8	3	40S ribosomal protein S5, N-terminally processed
UniRef90_O15031	-0.572637	-0.572637	2.2904	1.61956	40.2052	3	2	Plexin-B2
UniRef90_Q16181	-0.561365	-0.5745	0.358389	0.146312	40.1742	12	6	Septin-7
UniRef90_Q9BPU6	-0.79264	-0.584963	0.582185	0.260361	40	12	5	Dihydropyrimidinase-related protein 5
UniRef90_Q04447	-0.599915	-0.594042	0.253961	0.103679	39.8491	12	6	Creatine kinase B-type
UniRef90_P28331	-1.00311	-0.604071	0.828562	0.370544	39.6825	8	5	NADH-ubiquinone oxidoreductase 75 kDa subunit, mitochondrial
UniRef90_Q14103	-0.615532	-0.615532	0.481575	0.340525	39.4926	4	2	Heterogeneous nuclear ribonucleoprotein D0
UniRef90_P32119	-0.618904	-0.618904	0.278135	0.196671	39.4367	4	2	Peroxiredoxin-2
UniRef90_P40429	-0.623781	-0.623781	0.650938	0.460283	39.356	2	2	60S ribosomal protein L13a
UniRef90_P62851	-0.633708	-0.633708	0.314354	0.222282	39.1919	3	2	40S ribosomal protein S25
UniRef90_Q4G079	-0.605102	-0.634846	0.273499	0.111656	39.1731	9	6	Small inducible cytokine subfamily E, member 1
UniRef90_Q9NVA2	-0.475525	-0.636907	0.418626	0.170903	39.1391	9	6	Septin-11
UniRef90_Q5XIC0	-0.659231	-0.659231	0.1742	0.123178	38.7711	3	2	Peroxisomal 3,2-trans-enoyl-CoA isomerase
UniRef90_P29401	-0.612251	-0.659925	0.192158	0.049615	38.7597	17	15	Transketolase
UniRef90_Q66JR7	-0.482954	-0.659925	0.346179	0.199866	38.7597	3	3	Pgm2 protein (Fragment)
UniRef90_P07954	-0.683672	-0.677367	0.0663759	0.0331879	38.4731	7	4	Fumarate hydratase, mitochondrial
UniRef90_P34932	-0.641978	-0.678072	0.771766	0.445579	38.4615	6	3	Heat shock 70 kDa protein 4
UniRef90_P62424	-1.24568	-0.695746	1.11796	0.558981	38.172	5	4	60S ribosomal protein L7a
UniRef90_Q9UH65	-0.725075	-0.713696	0.03614	0.0208654	37.8788	4	3	Switch-associated protein 70
UniRef90_P16884	-0.483958	-0.722466	0.53294	0.307693	37.7358	5	3	Neurofilament heavy polypeptide
UniRef90_P62888	-0.726034	-0.726034	0.0678288	0.0479622	37.6778	4	2	60S ribosomal protein L30
UniRef90_P05141	-0.599294	-0.728561	0.823428	0.411714	37.6366	5	4	ADP/ATP translocase 2
UniRef90_P62081	-0.76053	-0.731183	0.240498	0.138852	37.594	3	3	40S ribosomal protein S7
UniRef90_P09429	-0.734735	-0.734735	0.0674211	0.0476739	37.5363	2	2	High mobility group protein B1
UniRef90_P26641	-0.960138	-0.763034	1.14477	0.467348	37.0775	10	6	Elongation factor 1-gamma
UniRef90_O95865	-0.799085	-0.773996	0.108946	0.0628998	36.9004	8	3	N(G),N(G)-dimethylarginine dimethylaminohydrolase 2
UniRef90_P62277	-1.01313	-0.799087	0.566388	0.327004	36.4964	5	3	40S ribosomal protein S13
UniRef90_P05091	0.0878474	-0.831877	1.60699	0.927796	35.9712	4	3	Aldehyde dehydrogenase, mitochondrial
UniRef90_P35268	-0.84353	-0.84353	0.0511598	0.0361754	35.7854	4	2	60S ribosomal protein L22
UniRef90_Q14315	-0.845253	-0.845253	4.94714	3.49815	35.758	4	2	Filamin-C
UniRef90_P63325	-0.883616	-0.883616	0.449746	0.318018	35.1495	6	2	40S ribosomal protein S10
UniRef90_P21796	-1.09166	-0.895303	0.648581	0.216194	34.965	13	9	Voltage-dependent anion-selective channel protein 1
UniRef90_P39019	-0.932147	-0.903038	0.172674	0.0652648	34.8432	10	7	40S ribosomal protein S19
UniRef90_P10252	-0.905736	-0.905736	0.453642	0.320773	34.8008	2	2	CD48 antigen
UniRef90_O75874	-0.921191	-0.906639	0.256416	0.0906566	34.7866	12	8	Isocitrate dehydrogenase [NADP] cytoplasmic
UniRef90_Q60870	-0.906807	-0.906807	1.29675	0.916942	34.7839	2	2	Receptor expression-enhancing protein 5
UniRef90_Q08209	-0.73286	-0.909998	0.672614	0.336307	34.7338	8	4	Serine/threonine-protein phosphatase 2B catalytic subunit alpha isoform
UniRef90_P40925	-0.93309	-0.910733	0.0455511	0.026299	34.7222	4	3	Malate dehydrogenase, cytoplasmic
UniRef90_Q9Y262	-0.914842	-0.914842	1.91088	1.3512	34.6577	3	2	Eukaryotic translation initiation factor 3 subunit L
UniRef90_P62841	-0.929667	-0.929667	0.0267769	0.0189341	34.4254	2	2	40S ribosomal protein S15
UniRef90_P04181	-1.2961	-0.933573	0.846397	0.319908	34.3643	10	7	Ornithine aminotransferase, renal form
UniRef90_P27595	-1.01291	-0.948601	0.276738	0.159774	34.1297	9	3	Hexokinase-1
UniRef90_P62906	-0.855092	-0.966597	0.899044	0.31786	33.8498	9	8	60S ribosomal protein L10a
UniRef90_O08709	-0.969858	-0.969858	0.300993	0.212835	33.7992	4	2	Peroxiredoxin-6
UniRef90_P48758	-0.969395	-0.974525	0.278355	0.113638	33.7269	9	6	Carbonyl reductase [NADPH] 1
UniRef90_P55084	-0.989098	-0.989098	0.015418	0.0109022	33.5015	2	2	3-ketoacyl-CoA thiolase
UniRef90_P04843	-0.769085	-1	0.517504	0.298781	33.3333	6	3	Dolichyl-diphosphooligosaccharide--protein glycosyltransferase subunit 1
UniRef90_O75396	-1.01347	-1.02857	0.119121	0.0687745	32.8947	8	3	Vesicle-trafficking protein SEC22b
UniRef90_P19096	-0.896209	-1.04614	0.421937	0.0994514	32.6265	42	18	Oleoyl-[acyl-carrier-protein] hydrolase
UniRef90_Q8R127	-0.771315	-1.04963	0.797355	0.356588	32.5733	7	5	Probable saccharopine dehydrogenase
UniRef90_Q9Z2I0	-0.398203	-1.05577	1.38404	0.692019	32.48	8	4	LETM1 and EF-hand domain-containing protein 1, mitochondrial
UniRef90_Q9Y277	-1.06803	-1.06803	0.116715	0.0825296	32.2938	3	2	Voltage-dependent anion-selective channel protein 3
UniRef90_Q9R0H0	-1.07528	-1.07528	0.265525	0.187755	32.184	3	2	Peroxisomal acyl-coenzyme A oxidase 1
UniRef90_Q99623	-1.10834	-1.10834	0.334451	0.236492	31.686	6	2	Prohibitin-2
UniRef90_P62269	-1.22278	-1.1177	0.182018	0.105088	31.5457	9	3	40S ribosomal protein S18
UniRef90_Q15008	-1.12373	-1.12373	2.09351	1.48034	31.4554	2	2	26S proteasome non-ATPase regulatory subunit 6
UniRef90_B2RZ80	-1.13237	-1.13237	0.259893	0.183772	31.3264	3	2	Fis1 protein
UniRef90_P04844	-1.13414	-1.13414	0.139326	0.0985184	31.3001	3	2	Dolichyl-diphosphooligosaccharide--protein glycosyltransferase subunit 2
UniRef90_O75746	-1.14769	-1.14769	1.28538	0.908898	31.0986	4	2	Calcium-binding mitochondrial carrier protein Aralar1
UniRef90_P11532	-1.15265	-1.15265	0.658442	0.465589	31.0249	7	2	Dystrophin
UniRef90_Q8BMK4	-0.991709	-1.15704	0.939922	0.420346	30.9598	6	5	Cytoskeleton-associated protein 4
UniRef90_P62266	-1.1592	-1.1592	0.642519	0.45433	30.9278	2	2	40S ribosomal protein S23
UniRef90_Q9DB73	-1.17338	-1.17338	0.675125	0.477385	30.7183	3	2	NADH-cytochrome b5 reductase 1
UniRef90_P07196	-1.1414	-1.17632	0.222956	0.128724	30.6748	12	3	Neurofilament light polypeptide
UniRef90_Q9BVK6	-1.17861	-1.17861	1.0245	0.724431	30.6412	2	2	Transmembrane emp24 domain-containing protein 9
UniRef90_P00405	-1.18645	-1.18645	0.501439	0.354571	30.5258	3	2	Cytochrome c oxidase subunit 2
UniRef90_P41219	-1.13883	-1.20163	0.321829	0.0970351	30.303	30	11	Peripherin
UniRef90_P15178	-1.21347	-1.21347	0.0615788	0.0435428	30.1301	3	2	Aspartyl-tRNA synthetase, cytoplasmic
UniRef90_P45880	-0.546265	-1.23879	1.84673	0.825881	29.7619	6	5	Voltage-dependent anion-selective channel protein 2
UniRef90_O14672	-1.25363	-1.25363	1.22197	0.864064	29.5473	4	2	Disintegrin and metalloproteinase domain-containing protein 10
UniRef90_P13086	-1.00551	-1.26903	1.61495	0.93239	29.3255	3	3	Succinyl-CoA ligase [GDP-forming] subunit alpha, mitochondrial
UniRef90_P00367	-1.39143	-1.28096	0.582725	0.336436	29.1545	7	3	Glutamate dehydrogenase 1, mitochondrial
UniRef90_P62750	-1.33304	-1.33304	1.69074	1.19553	28.4145	2	2	60S ribosomal protein L23a
UniRef90_P35232	-1.35586	-1.34483	0.0350161	0.0202165	28.2486	7	3	Prohibitin
UniRef90_P68371	-1.34765	-1.34765	0.128186	0.0906411	28.2089	2	2	Tubulin beta-2C chain
UniRef90_Q55EU6	-1.34899	-1.34899	2.04488	1.44595	28.1902	3	2	Putative actin-23
UniRef90_P09622	-1.16399	-1.3505	0.620264	0.234438	28.169	9	7	Dihydrolipoyl dehydrogenase, mitochondrial
UniRef90_P49755	-1.28796	-1.35332	0.773502	0.386751	28.1294	4	4	Transmembrane emp24 domain-containing protein 10
UniRef90_P31040	-1.36238	-1.36238	0.564138	0.398906	28.0027	3	2	Succinate dehydrogenase [ubiquinone] flavoprotein subunit, mitochondrial
UniRef90_Q14165	-1.40296	-1.40296	0.0424316	0.0300037	27.4391	3	2	Malectin
UniRef90_O35855	-1.4134	-1.4134	0.0650966	0.0460303	27.2952	2	2	Branched-chain-amino-acid aminotransferase, mitochondrial
UniRef90_Q8QZT1	-1.14103	-1.46239	1.27115	0.635573	26.6266	6	4	Acetyl-CoA acetyltransferase, mitochondrial
UniRef90_P19783	-1.52864	-1.46467	0.150195	0.0671691	26.5957	7	5	Cytochrome c oxidase subunit 4 isoform 1, mitochondrial
UniRef90_Q9Z2I9	-1.54403	-1.52607	0.0355396	0.0205188	25.7732	5	3	Succinyl-CoA ligase [ADP-forming] subunit beta, mitochondrial
UniRef90_Q00325	-1.4426	-1.54583	0.633123	0.223843	25.512	11	8	Phosphate carrier protein, mitochondrial
UniRef90_P08249	-1.43949	-1.5656	0.467902	0.120812	25.2525	23	15	Malate dehydrogenase, mitochondrial
UniRef90_P23965	-1.6713	-1.5656	0.232014	0.133953	25.2525	6	3	3,2-trans-enoyl-CoA isomerase, mitochondrial
UniRef90_Q8BMS1	-1.51879	-1.57731	0.50271	0.158971	25.0996	12	10	Long chain 3-hydroxyacyl-CoA dehydrogenase
UniRef90_Q99798	-1.31709	-1.59981	0.765895	0.382948	24.8075	14	4	Aconitate hydratase, mitochondrial
UniRef90_P06801	-1.60046	-1.60046	0.275024	0.194472	24.7991	3	2	NADP-dependent malic enzyme
UniRef90_Q9JKC6	-1.60235	-1.60235	0.882691	0.624156	24.7747	2	2	Cell cycle exit and neuronal differentiation protein 1
UniRef90_Q9WTP7	-1.56542	-1.61353	0.122142	0.0407141	24.6305	12	9	GTP:AMP phosphotransferase mitochondrial
UniRef90_Q64057	-1.66482	-1.66482	0.602502	0.426033	23.9766	2	2	Alpha-aminoadipic semialdehyde dehydrogenase (Fragment)
UniRef90_O75323	-1.67082	-1.67082	0.204712	0.144753	23.9008	5	2	Protein NipSnap homolog 2
UniRef90_B4E168	-1.67312	-1.67312	1.53889	1.08816	23.8718	5	2	Adenosylhomocysteinase
UniRef90_P00505	-1.63812	-1.67356	0.300748	0.100249	23.8663	14	9	Aspartate aminotransferase, mitochondrial
UniRef90_P02688	-1.67694	-1.67694	1.41262	0.998872	23.8237	5	2	Myelin basic protein S
UniRef90_Q3KR86	-1.50458	-1.68257	0.347327	0.200529	23.753	4	3	Inner membrane protein, mitochondrial
UniRef90_P12235	-1.7552	-1.68632	0.502903	0.251452	23.7059	4	4	ADP/ATP translocase 1
UniRef90_Q8CAY6	-1.33935	-1.71809	0.847203	0.378881	23.31	10	5	Acetyl-CoA acetyltransferase, cytosolic
UniRef90_P51660	-1.71867	-1.71867	1.35998	0.961651	23.3028	5	2	3-alpha,7-alpha,12-alpha-trihydroxy-5-beta-cholest-24-enoyl-CoA hydratase
UniRef90_Q02978	-1.74393	-1.74393	0.0365462	0.0258421	22.9913	4	2	Mitochondrial 2-oxoglutarate/malate carrier protein
UniRef90_P06576	-1.71397	-1.76972	0.458567	0.145012	22.6764	25	10	ATP synthase subunit beta, mitochondrial
UniRef90_P13804	-1.74188	-1.79909	0.164839	0.0549463	22.3214	12	9	Electron transfer flavoprotein subunit alpha, mitochondrial
UniRef90_Q99714	-1.86922	-1.85997	0.0751847	0.0434079	21.5983	8	3	3-hydroxyacyl-CoA dehydrogenase type-2
UniRef90_Q96I99	-1.87001	-1.89336	0.104939	0.0524696	21.2089	6	4	Succinyl-CoA ligase [GDP-forming] subunit beta, mitochondrial
UniRef90_O35295	-1.91817	-1.91817	0.110612	0.0782146	20.9229	3	2	Transcriptional activator protein Pur-beta
UniRef90_P25705	-1.83143	-1.95606	0.457049	0.137805	20.4918	20	11	ATP synthase subunit alpha, mitochondrial
UniRef90_Q9CPQ1	-1.9666	-1.9666	0.0574143	0.040598	20.373	2	2	Cytochrome c oxidase subunit 6C
UniRef90_P53007	-1.95819	-1.97085	0.0551124	0.024647	20.3252	8	5	Tricarboxylate transport protein, mitochondrial
UniRef90_P50993	-1.85403	-1.99045	0.759228	0.268427	20.1061	10	8	Sodium/potassium-transporting ATPase subunit alpha-2
UniRef90_P56571	-2.22997	-2.02148	0.671964	0.300512	19.7628	7	5	ES1 protein homolog, mitochondrial
UniRef90_Q99PU5	-2.05371	-2.05371	0.431687	0.305249	19.411	6	2	Long-chain-fatty-acid--CoA ligase ACSBG1
UniRef90_P10760	-2.0554	-2.0554	1.14624	0.810516	19.3926	2	2	Adenosylhomocysteinase
UniRef90_P11498	-2.06937	-2.06937	1.25396	0.886682	19.2417	13	2	Pyruvate carboxylase, mitochondrial
UniRef90_Q8QZS1	-2.08178	-2.08178	0.978939	0.692215	19.1084	2	2	3-hydroxyisobutyryl-CoA hydrolase, mitochondrial
UniRef90_P35435	-2.09203	-2.0959	0.0724502	0.0362251	18.9576	4	4	ATP synthase subunit gamma, mitochondrial
UniRef90_P08574	-2.12615	-2.12615	0.48612	0.343739	18.6376	3	2	Cytochrome c1, heme protein, mitochondrial
UniRef90_Q8NHW5	-1.58837	-2.1375	1.35721	0.783583	18.5185	4	3	60S acidic ribosomal protein P0-like
UniRef90_Q9CQF9	-2.24868	-2.14937	1.49149	0.745743	18.3947	6	4	Prenylcysteine oxidase
UniRef90_Q9DB77	-2.43953	-2.16672	0.706154	0.315801	18.2149	9	5	Cytochrome b-c1 complex subunit 2, mitochondrial
UniRef90_P48735	-2.25134	-2.26725	0.940399	0.332481	17.1997	10	8	Isocitrate dehydrogenase [NADP], mitochondrial
UniRef90_P50213	-2.29028	-2.29028	0.904408	0.639513	16.9736	5	2	Isocitrate dehydrogenase [NAD] subunit alpha, mitochondrial
UniRef90_O43175	-2.26674	-2.33914	0.447135	0.149045	16.5017	14	9	D-3-phosphoglycerate dehydrogenase
UniRef90_P04904	-2.51379	-2.39882	0.376352	0.188176	15.9395	7	4	Glutathione S-transferase alpha-3
UniRef90_Q8BH95	-1.71667	-2.43029	1.64974	0.952477	15.6495	7	3	Enoyl-CoA hydratase, mitochondrial
UniRef90_Q9CQQ7	-2.43812	-2.50335	0.207163	0.0926462	14.9925	7	5	ATP synthase subunit b, mitochondrial
UniRef90_Q9CQ62	-2.50926	-2.50926	1.03386	0.731053	14.9403	3	2	2,4-dienoyl-CoA reductase, mitochondrial
UniRef90_Q8IUE6	-2.55365	-2.55365	0.597811	0.422716	14.5536	3	2	Histone H2A type 2-B
UniRef90_O35409	-2.05419	-2.57049	1.7112	0.855598	14.409	9	4	Glutamate carboxypeptidase 2
UniRef90_P10412	-2.57091	-2.57289	0.303893	0.175453	14.3885	3	3	Histone H1.4
UniRef90_Q5QNW6	-1.989	-2.57753	1.33511	0.667556	14.3489	8	4	Histone H2B type 2-F
UniRef90_Q71DI3	-2.6584	-2.6584	0.296275	0.209498	13.6737	2	2	Histone H3.2
UniRef90_P62805	-2.60067	-2.66442	0.159207	0.0796037	13.6245	6	4	Histone H4
UniRef90_P10649	-2.71461	-2.71809	0.299987	0.134158	13.1926	12	5	Glutathione S-transferase Mu 1
UniRef90_Q16836	-2.60904	-2.7378	0.933884	0.466942	13.0369	4	4	Hydroxyacyl-coenzyme A dehydrogenase, mitochondrial
UniRef90_P31786	-2.85572	-2.85572	1.08168	0.764866	12.1379	2	2	Acyl-CoA-binding protein
UniRef90_P24473	-2.88575	-2.88557	0.196531	0.113467	11.919	3	3	Glutathione S-transferase kappa 1
UniRef90_Q13884	-2.97098	-2.97098	0.672148	0.475281	11.3114	3	2	Beta-1-syntrophin
UniRef90_Q00577	-2.63574	-2.97817	0.763604	0.31174	11.2615	8	6	Transcriptional activator protein Pur-alpha
UniRef90_Q8VCW8	-3.20832	-3.20832	1.45946	1.032	9.76303	3	2	Acyl-CoA synthetase family member 2, mitochondrial
UniRef90_Q02252	-3.48767	-3.24184	0.515821	0.230682	9.56023	9	5	Methylmalonate-semialdehyde dehydrogenase [acylating], mitochondrial
UniRef90_P14415	-3.35479	-3.25701	0.254669	0.147033	9.4697	3	3	Sodium/potassium-transporting ATPase subunit beta-2
UniRef90_Q16762	-4.06738	-3.28688	1.73476	1.00156	9.29368	7	3	Thiosulfate sulfurtransferase
UniRef90_Q8BWT1	-3.15582	-3.30305	0.314355	0.118815	9.19963	9	7	3-ketoacyl-CoA thiolase, mitochondrial
UniRef90_P02088	-3.09431	-3.33878	1.73308	0.866539	8.99482	10	4	Hemoglobin subunit beta-1
UniRef90_Q64644	-3.57973	-3.57289	0.150314	0.0867841	7.75194	5	3	Choline dehydrogenase (Fragment)
UniRef90_Q8K442	-3.59984	-3.59984	0.665463	0.470553	7.61942	5	2	ATP-binding cassette sub-family A member 8-A
