# Supplementary material for: Translatome Regulation in Neuronal Injury and Axon Regrowth
Source: eNeuro. 2018 May 10;5(2):ENEURO.0276-17.2018. doi: 10.1523/ENEURO.0276-17.2018 (PMC5944006; doi:10.1523/ENEURO.0276-17.2018)
Supplement: Extended Data Figure 7-1 — Genes significantly enriched in RiboTag pull-downs from proprioceptive neurons extracted from ganglia and cultures (RNA-seq). Lists of overlapping genes between Runx3-Cre RiboTag ganglia, Runx3-Cre RiboTag culture RNA-seq, and SILAC datasets. Download Figure 7-1, XLSX file. [file sup_enu-eN-NWR-0276-17-s05.xlsx]

## Sheet: Tissue Runx3-RiboTag Enriched
Gene	IP vs Input Fold Enrichment	IP vs Input p-value	IP vs Input FDR
C130080G10Rik	72.1449	1.94302e-08	1.42813e-07
Pah	71.6645	4.26575e-05	0.000191299
Xylt1	63.9782	0.00151428	0.00508556
Olfr856-ps1	62.1287	3.19529e-06	1.71524e-05
Wnt3a	61.0594	1.76727e-11	1.86562e-10
Nmbr	57.6938	0.000417425	0.00156961
Lrit2	47.1939	0.000148275	0.000603199
Nr4a3	38.1563	0.00104573	0.00363376
Gm16325	37.5541	0.000355826	0.00135633
Fbxo40	35.5616	3.44703e-12	3.92642e-11
Ncr1	34.1295	5.71132e-09	4.47234e-08
5730559C18Rik	32.3787	9.05339e-08	6.12415e-07
Nos1ap	29.1576	2.96913e-09	2.40821e-08
Gm20125	28.67	0.00148245	0.00499158
1700092K14Rik	26.8247	0.00150528	0.00506225
Nt5c1a	26.1305	0.00660379	0.0190182
Lrrc30	26.1095	0.00138035	0.00467614
2410012M07Rik	25.934	2.39517e-05	0.000112106
B430010I23Rik	25.8665	0.00195267	0.00640853
Cmtm2b	24.8675	0.00409162	0.0124519
1190003K10Rik	23.7859	0.0175035	0.0449592
Hist1h1a	23.246	0.00446909	0.0134725
Hcrt	22.9074	0.0324199	0.0772853
Pet117	22.9056	0.0096611	0.0266536
Gbx2	22.625	0.00233547	0.00752734
Klhdc7b	22.4048	0.0236565	0.0586353
Lancl3	22.1252	4.32293e-08	3.05246e-07
Ugt1a5	21.9187	0.00439282	0.0132854
Lrrc7	21.7033	1.00863e-07	6.79529e-07
Mnx1	21.6369	0.0115298	0.0311466
Onecut1	21.2145	6.05398e-08	4.19735e-07
Lzts1	20.7789	0.000195532	0.000778363
Gm15348	20.6167	7.78308e-06	3.93724e-05
Sec14l4	20.5937	9.25172e-05	0.00039308
Zfp457	20.5361	0.00279257	0.00884074
LOC622167	20.4048	0.00714391	0.0203958
Abcc2	20.2051	7.7101e-05	0.000331319
4930594C11Rik	20.0173	0.0118668	0.0319607
Cdkl5	19.7693	0.000176791	0.000709442
Hhla1	19.7368	0.00342937	0.0106178
Fut4-ps1	19.3922	0.0186164	0.0475303
Serpina3b	19.3381	2.44711e-07	1.54564e-06
Syt17	19.2114	3.48341e-06	1.86092e-05
9530003J23Rik	18.6295	0.0107819	0.0293332
Klra7	18.5997	0.000720136	0.0025811
Mir345	18.3659	0.00581921	0.0170004
Apol8	17.742	2.62479e-14	3.69448e-13
Slc6a18	17.6747	0.0143246	0.0377235
Klk1b27	17.621	4.02797e-08	2.85194e-07
Il5ra	17.5214	1.14579e-06	6.58999e-06
Tlr8	17.4496	0.023338	0.0579074
Slc25a41	17.3671	0.0118775	0.0319825
Umodl1	17.2869	0.00650678	0.0187812
Gm18409	17.0411	0.00691468	0.0198116
Agmat	17.0397	3.37133e-07	2.09484e-06
Spink8	16.9871	0.00641686	0.0185308
D830046C22Rik	16.7012	0.00779708	0.0220503
Olfm4	16.6109	1.00735e-10	9.77259e-10
Hist1h2bn	16.1913	0.0106106	0.0289042
Atp7b	15.9097	0.00224461	0.00726055
Six3os1	15.875	0.00191475	0.00629739
Syce1l	15.4933	0.0195912	0.0496498
Cabp7	15.3885	0.000105916	0.000444986
Slco6c1	15.3852	3.80903e-06	2.02331e-05
Muc5b	15.3183	0.0207205	0.0522058
Gm11062	15.2172	0.0403865	0.0935488
Sspo	15.1058	1.9049e-32	1.23217e-30
Ush2a	15.0394	0.0146618	0.0384934
Asb18	15.0141	0.00133964	0.00454878
Gm136	14.9349	0.0153885	0.0401494
Shox2	14.8919	8.42057e-08	5.71595e-07
Dusp27	14.8611	5.15198e-25	1.83951e-23
2310002D06Rik	14.7682	2.54629e-06	1.38598e-05
Hist1h2bl	14.7522	0.0113169	0.0306272
1700034G24Rik	14.6751	1.05983e-06	6.1273e-06
Tmprss4	14.4424	0.0189405	0.0482206
Pappa2	14.0498	2.04983e-25	7.53789e-24
Gm10390	13.9335	7.01871e-10	6.17535e-09
Agbl1	13.8395	0.00451097	0.0135882
Gm13629	13.726	9.98062e-21	2.52227e-19
4930471C04Rik	13.6784	0.0232049	0.0576199
Cym	13.4094	0.0278307	0.0676602
Nxph1	13.2479	3.15086e-21	8.3514e-20
Snrpn	13.1949	0.000128964	0.000532152
Inhbb	13.192	9.85593e-53	1.934e-50
Spata21	13.075	1.8249e-07	1.17684e-06
Ces3b	12.9466	8.7409e-05	0.000372393
Pcdhgc4	12.905	3.55548e-05	0.000161462
D7Ertd443e	12.8632	4.46015e-12	5.0144e-11
Scgb1b30	12.8329	0.0414085	0.0954453
E130003G02Rik	12.8021	0.000292163	0.0011299
Ccdc85c	12.7703	9.46933e-05	0.000401741
1700094J05Rik	12.7615	0.0378304	0.0885325
4930483O08Rik	12.71	0.010887	0.0295952
Whrn	12.6394	2.77626e-37	2.3574e-35
Slc26a3	12.5723	0.0343549	0.081419
Defb47	12.5653	0.032585	0.0776499
Nanog	12.5322	0.00017854	0.00071597
Rgs6	12.4748	2.70997e-07	1.702e-06
Hsd17b2	12.2751	1.25711e-08	9.44187e-08
Tmem132d	12.2713	4.25877e-07	2.59991e-06
Tyms-ps	12.2435	0.0409247	0.0945236
Mia2	12.2293	0.0227233	0.0565927
Eno1	12.2	0.00602692	0.0175305
Psg17	11.9813	0.0136397	0.036107
4930578I06Rik	11.8782	0.0262345	0.0642815
Smtnl1	11.8654	3.02074e-09	2.44751e-08
Mir1199	11.8462	2.54036e-22	7.40574e-21
Acnat1	11.8421	0.0246447	0.0608008
Fam163a	11.7985	2.28845e-17	4.25458e-16
Coro6	11.7572	1.20717e-07	8.0218e-07
Vmn2r87	11.7266	0.0413517	0.0953683
Kng1	11.6415	0.0347901	0.0823335
Cd300e	11.6234	0.0313279	0.0749834
Cdcp2	11.615	0.0317364	0.0758446
Lce1g	11.6069	3.31318e-06	1.77567e-05
Mir3960	11.6025	0.000164436	0.000663743
Prdx6b	11.575	0.0268406	0.0655739
Lmln	11.517	2.49913e-06	1.36253e-05
Vmn2r90	11.304	0.030514	0.0732907
Ndst4	11.2644	5.4823e-21	1.41769e-19
Asb16	11.1397	0.000885432	0.00312087
Runx3	11.1198	1.44697e-33	1.00262e-31
Heg1	11.0119	1.46924e-07	9.64258e-07
Hsd17b3	10.8678	0.00220099	0.00713131
Kcnj9	10.864	1.81682e-11	1.9136e-10
Tmem132b	10.7529	5.79215e-30	3.02579e-28
Cdh12	10.7318	9.46768e-30	4.8696e-28
Gprin2	10.616	2.48154e-05	0.00011587
Esrrb	10.5462	1.40811e-48	2.22167e-46
Sh2d2a	10.5248	0.000600743	0.00218913
Pmfbp1	10.5071	4.7905e-18	9.55909e-17
Gpr63	10.506	0.0195379	0.0495309
Gzmk	10.4884	2.48304e-05	0.000115917
Eomes	10.3784	0.00500534	0.014891
D830013O20Rik	10.18	0.0385563	0.089907
Lmcd1	10.0961	3.40916e-29	1.70101e-27
Rasd2	10.0086	2.78282e-14	3.90046e-13
Irs2	9.98579	0.000273952	0.00106493
Csf3	9.76969	0.00102584	0.00356941
Gm6904	9.76442	0.00598042	0.0174191
A230077H06Rik	9.74343	5.04684e-24	1.68356e-22
Cd247	9.67709	1.18489e-06	6.80145e-06
Chrdl2	9.63466	3.50608e-05	0.000159377
Lhx3	9.63366	6.55023e-05	0.000284937
Clmp	9.61821	6.36459e-11	6.30278e-10
2310042D19Rik	9.60539	8.3738e-23	2.52305e-21
Phospho1	9.58568	0.000429643	0.00161322
Sfmbt2	9.58341	2.12615e-20	5.22057e-19
Fgf11	9.52601	0.000111295	0.00046591
Cit	9.448	4.3478e-07	2.64803e-06
Dub3	9.38114	0.00860577	0.0240749
Rimbp2	9.31686	0.000114474	0.000477678
Sntg2	9.23615	3.85865e-26	1.5118e-24
Wnt7a	9.21787	7.07179e-55	1.5727e-52
Csn1s2a	9.21381	3.1842e-17	5.82257e-16
Zfp964	9.2084	0.000313767	0.00120546
Gm16551	9.16925	4.80664e-55	1.07923e-52
Grpr	9.15899	0.00967684	0.0266939
Tmem196	9.10247	0.000232332	0.000913728
Anxa10	9.04413	0.00109643	0.00379132
Ccbe1	9.01158	1.95221e-11	2.04605e-10
Mir129-1	9.01	0.000113369	0.000473489
Kif21b	8.86861	1.32513e-35	1.03836e-33
Esrrg	8.85009	1.1103e-17	2.12687e-16
Rapgef5	8.8423	6.31224e-08	4.36344e-07
Sowahb	8.84081	1.6434e-17	3.09726e-16
Gpr84	8.84028	0.00867174	0.0242392
Yipf7	8.83963	2.1834e-11	2.27712e-10
Onecut3	8.83108	0.000118474	0.000493221
Myot	8.81405	0.000596626	0.00217549
Hcn4	8.79324	0.00116662	0.00401144
Vstm2b	8.78199	5.26048e-56	1.1926e-53
Pak6	8.76299	2.01843e-13	2.60113e-12
Wasf3	8.66433	0.000132078	0.000544517
Olfr12	8.65823	0.00354507	0.0109542
Wdr72	8.6363	1.18532e-36	9.78033e-35
Pdgfd	8.63094	1.61075e-07	1.05122e-06
Plcb4	8.54341	0.000542865	0.00199598
Mir196a-1	8.52872	0.000133584	0.000550242
Atp2b3	8.52334	9.70891e-06	4.84015e-05
Plekhg1	8.50934	1.25318e-72	7.13734e-70
2810459M11Rik	8.50338	2.18297e-25	8.00227e-24
Fam217b	8.48693	0.000275286	0.00106994
Relt	8.47743	5.7179e-57	1.40546e-54
Hist1h1b	8.45701	0.0252289	0.0620845
Sstr3	8.4159	3.74675e-07	2.3042e-06
Slc27a2	8.40534	0.000314084	0.00120648
Gpr52	8.31334	8.97062e-07	5.23813e-06
Ntm	8.31058	1.053e-05	5.22163e-05
Bpifb1	8.2809	2.72377e-24	9.29865e-23
Vgll2	8.27774	4.26767e-17	7.68939e-16
Htr6	8.22966	7.4057e-11	7.28742e-10
Myo5b	8.21021	1.54936e-19	3.54697e-18
D630039A03Rik	8.19805	1.2954e-05	6.33219e-05
Syt2	8.15177	3.2279e-11	3.30301e-10
Rora	8.13713	0.00506804	0.0150579
Barx1	8.13434	9.17407e-05	0.000389923
Atp11a	8.11881	1.76394e-16	3.01757e-15
B3galt5	8.10527	1.00954e-26	4.15762e-25
Tenm4	8.07576	1.33182e-07	8.79008e-07
Mgat5	8.07465	1.21204e-05	5.95461e-05
Cxcr6	7.95909	6.83462e-06	3.49071e-05
Ccdc177	7.95664	5.64366e-20	1.34337e-18
BC049352	7.89537	8.83599e-10	7.68166e-09
Rcor1	7.89431	0.0015348	0.00514634
Klra1	7.88928	0.0352086	0.0831721
Adra1d	7.88139	2.31928e-20	5.68285e-19
Me3	7.87631	4.91434e-14	6.71081e-13
Ankrd26	7.86591	2.44905e-08	1.77216e-07
A630007B06Rik	7.8555	4.13131e-05	0.000185563
Cux2	7.79587	7.22e-25	2.55833e-23
1700019A02Rik	7.77593	0.0117086	0.0315859
Epha10	7.76241	1.14215e-17	2.1843e-16
En2	7.75933	0.00364792	0.0112393
Cd8b1	7.73619	2.41646e-05	0.000113057
Enah	7.72152	2.67642e-18	5.43926e-17
A930018P22Rik	7.68515	0.0012582	0.00429849
Kcnc1	7.68493	6.27326e-28	2.83889e-26
Mdga1	7.67429	4.12938e-24	1.38941e-22
Cd163l1	7.6485	0.000525982	0.0019394
1700017G19Rik	7.61765	0.000582245	0.00212703
Gm1715	7.61473	0.000362341	0.00137959
Wwc1	7.60912	1.31692e-08	9.8752e-08
Gpr139	7.60505	0.0235791	0.0584683
Crisp3	7.60025	0.00885002	0.0246827
Gm16119	7.59466	1.10591e-07	7.39943e-07
Dmbx1	7.55246	1.28062e-11	1.37678e-10
Six3	7.54367	0.00132221	0.0044935
Flywch1	7.54341	4.99612e-05	0.000221627
Irx3	7.53194	1.20927e-27	5.40951e-26
Rims4	7.50241	0.000241508	0.00094749
Igdcc4	7.48989	3.76691e-54	7.99646e-52
8030462N17Rik	7.46331	2.31655e-05	0.000108644
Cdh22	7.44766	5.71817e-21	1.47705e-19
Tekt5	7.43646	1.25818e-05	6.16317e-05
2310015D24Rik	7.37558	0.000100915	0.000425891
Stx1b	7.37477	3.05444e-06	1.64493e-05
Klhl34	7.36736	0.00105181	0.00365381
Rcsd1	7.31838	4.4116e-41	4.57845e-39
Zbtb38	7.30211	0.000512076	0.0018929
Hhipl1	7.29659	3.08714e-06	1.66178e-05
Ptprh	7.28203	0.00185499	0.00611894
Pln	7.28093	2.00329e-20	4.92928e-19
Slit2	7.26672	8.28718e-26	3.13637e-24
Pcdha1	7.2021	0.0136918	0.0362261
Tuba8	7.19313	1.20491e-23	3.88617e-22
Gzma	7.1476	0.000177641	0.000712607
Gm628	7.14482	8.36642e-11	8.16058e-10
Txndc2	7.13147	7.34142e-05	0.000316524
Hist1h2bj	7.11489	0.00978699	0.0269341
Cyp4x1	7.10088	0.0013834	0.00468373
Epha3	7.10014	7.48429e-05	0.000322386
Ddi2	7.08731	0.00122443	0.00419293
Klre1	7.0818	0.000632822	0.00229315
Mrvi1	7.06744	1.21486e-18	2.53288e-17
Mir744	7.01331	0.0149173	0.0390552
Lhfpl1	7.01113	1.10577e-71	5.73794e-69
Cd8a	6.98599	3.739e-05	0.000168975
Hist1h2af	6.98232	5.66914e-05	0.000248882
Spats2	6.96319	1.06889e-05	5.29481e-05
Nr0b2	6.95873	1.24883e-14	1.80677e-13
4930544M13Rik	6.94704	0.00824449	0.0231781
Ppp1r12b	6.94198	2.45491e-06	1.34156e-05
F9	6.9375	8.85918e-21	2.24859e-19
5430437J10Rik	6.9308	0.00568589	0.0166631
Rsph4a	6.90877	1.13552e-22	3.36493e-21
Il27ra	6.89885	1.23114e-16	2.12794e-15
Pdcd1	6.89115	0.0308165	0.0738805
Cmya5	6.88566	5.76174e-16	9.40856e-15
Gm6416	6.88423	1.37413e-07	9.05142e-07
2010-03-02	6.88213	1.2414e-05	6.09119e-05
Myadml2	6.88163	7.11982e-36	5.67423e-34
Srcrb4d	6.86227	1.38964e-11	1.48578e-10
Abo	6.84491	8.47537e-08	5.74814e-07
Fam65c	6.83417	4.89847e-09	3.85911e-08
Btn2a2	6.81212	4.137e-15	6.23246e-14
Prf1	6.8079	0.00369697	0.0113724
Vdr	6.79915	4.31054e-17	7.76063e-16
Susd4	6.79787	6.61746e-05	0.000287594
Frmpd3	6.79524	7.12226e-07	4.2147e-06
Kcnj11	6.78295	1.30901e-16	2.25584e-15
Gzmb	6.77732	0.00368014	0.0113266
Frmpd4	6.73192	3.45859e-30	1.83549e-28
Fam59a	6.73057	2.19683e-07	1.39473e-06
Galm	6.717	8.79122e-31	4.8761e-29
Impa2	6.71097	4.63987e-27	1.96635e-25
Ckmt2	6.70136	0.000649369	0.00234728
Ccdc108	6.6702	0.0222428	0.0556034
Mir191	6.66334	0.0381121	0.0890848
Anxa11	6.6474	0.00253016	0.00809334
Rhbdl3	6.64686	1.36526e-54	3.00756e-52
Gprc5b	6.64057	1.20857e-15	1.92505e-14
Nr2e3	6.63489	0.0196439	0.0497781
Cntnap5a	6.6283	3.95115e-10	3.58582e-09
Ankrd34c	6.61265	5.62388e-08	3.91775e-07
Myl3	6.60959	4.14674e-14	5.71315e-13
Klhl33	6.60488	6.08474e-09	4.752e-08
Rab11fip4	6.59987	1.35372e-09	1.15157e-08
Art1	6.58944	1.40455e-08	1.04986e-07
Pcdhga10	6.58637	0.0136492	0.0361281
Themis	6.57728	0.0148272	0.038863
Smpx	6.56902	5.68399e-33	3.81399e-31
Nlrp6	6.56032	0.000293638	0.00113447
Cd3e	6.55598	1.24999e-06	7.14528e-06
Smad9	6.52922	1.36411e-39	1.30546e-37
Heatr5a	6.49745	2.98396e-31	1.73762e-29
Aox4	6.48719	8.39579e-36	6.62331e-34
Zfp750	6.45942	1.49714e-20	3.72705e-19
Evpl	6.45755	7.9196e-14	1.06221e-12
Otog	6.45639	0.00428029	0.0129804
Npffr1	6.45575	0.00238227	0.00766337
Cntnap5b	6.43563	4.28424e-06	2.25318e-05
Kcnk1	6.42942	1.7574e-14	2.50991e-13
Tcte1	6.41051	0.000189023	0.000753864
Ano1	6.40542	6.9479e-17	1.23096e-15
Hydin	6.38797	0.003682	0.0113308
Gjd2	6.38437	1.9855e-21	5.36614e-20
Crisp1	6.36472	5.41714e-10	4.83546e-09
Car2	6.36465	4.67362e-49	7.57873e-47
Rin1	6.34439	4.12903e-13	5.1865e-12
Ankrd34b	6.33641	1.15283e-17	2.20293e-16
Gm5105	6.33094	0.000132626	0.000546584
Iqcj-schip1	6.32978	0.0318397	0.0760757
1700016C15Rik	6.3251	0.0336487	0.0798588
Arhgef37	6.32346	4.12581e-06	2.17688e-05
Tll1	6.30894	1.08164e-09	9.31323e-09
Prss50	6.29788	0.0224501	0.0560136
Rsc1a1	6.28523	0.0146631	0.0384934
Unc80	6.27885	1.04517e-33	7.35111e-32
Tktl1	6.26334	0.00198694	0.00650729
Fam78a	6.2482	7.04072e-17	1.24646e-15
Drd2	6.24779	1.51564e-07	9.93179e-07
D430041D05Rik	6.23568	1.9225e-31	1.1394e-29
Hist2h2aa2	6.22924	0.00298228	0.00936514
Ccdc121	6.22731	1.28353e-09	1.09546e-08
Klrb1c	6.19572	2.98451e-05	0.000137512
Myh15	6.18939	4.95544e-16	8.15464e-15
Xkr5	6.18602	0.0040666	0.0123838
Map3k13	6.16843	4.58249e-07	2.78081e-06
2210407C18Rik	6.12075	1.09667e-05	5.42206e-05
Fam184b	6.12023	3.01778e-12	3.45771e-11
Gdf11	6.06628	9.60083e-07	5.58239e-06
Hapln4	6.05964	1.24666e-46	1.78593e-44
Naif1	6.05742	0.00100275	0.00349481
Hist1h2bh	6.05478	0.00279448	0.00884559
Spp1	6.05112	6.88896e-13	8.46654e-12
Chrm3	6.04731	4.57903e-06	2.3985e-05
Cgn	6.0388	5.9284e-07	3.55232e-06
Sik2	6.0297	0.000816317	0.00289693
Serpina3c	6.0143	2.0835e-13	2.68202e-12
Gm889	6.01018	6.40752e-20	1.5221e-18
Dact2	5.99779	4.23619e-09	3.36345e-08
Pax3	5.96915	0.0327285	0.0779284
Cdh20	5.96716	6.03865e-26	2.31541e-24
Sema3f	5.95699	7.95237e-35	5.97093e-33
Ceacam-ps1	5.94914	0.0022512	0.00728086
Uhmk1	5.93558	0.000140337	0.000573906
A930011G23Rik	5.92583	0.0361527	0.0851354
Trpc1	5.91928	5.82959e-05	0.000255541
Speer4b	5.9173	0.02257	0.0562707
Susd3	5.91553	5.46206e-19	1.18426e-17
Etv1	5.91399	5.2322e-28	2.37699e-26
Pcdhga3	5.8967	0.00639245	0.0184717
Stk24	5.89275	6.71953e-14	9.10353e-13
Srpx2	5.88408	3.2981e-13	4.17193e-12
0610039K10Rik	5.8592	0.0248683	0.0613005
Pcdhga2	5.85784	0.0193551	0.0491422
Fam19a2	5.8481	4.9303e-56	1.1287e-53
Arhgef11	5.84808	0.00267335	0.00850367
Rell2	5.8453	0.000772085	0.00275167
Cdkl4	5.82836	1.2741e-17	2.42671e-16
Fam163b	5.82442	6.94803e-08	4.77327e-07
Bpifa5	5.8243	8.39052e-17	1.47424e-15
B230312C02Rik	5.82168	6.07851e-10	5.40104e-09
Ybx2	5.80767	4.26937e-12	4.81149e-11
Ms4a4b	5.79557	2.26889e-07	1.43814e-06
Trip10	5.78553	3.77073e-57	9.46777e-55
Chodl	5.7855	5.00035e-21	1.30462e-19
1700007F19Rik	5.78021	0.00141693	0.00478753
Myh7b	5.7639	9.76533e-16	1.56399e-14
Ceacam9	5.76302	0.0326645	0.0777998
Opn5	5.7601	0.00296124	0.00930409
Cacng5	5.74528	2.89731e-21	7.73201e-20
Pth1r	5.73985	7.03568e-44	8.64685e-42
Sh3bgr	5.7389	1.55277e-42	1.70228e-40
Cd200r3	5.72723	0.0356737	0.0841601
Sema6b	5.72114	1.82237e-24	6.30431e-23
Ogdhl	5.71683	1.72437e-51	3.07372e-49
Fhod3	5.70026	3.944e-15	5.95322e-14
Gabbr2	5.69082	0.0022434	0.00725762
Solh	5.68556	0.00499809	0.0148713
E430016F16Rik	5.68072	0.000101555	0.000428197
Pvalb	5.66393	1.24141e-10	1.18755e-09
Ccdc36	5.66213	0.00463021	0.0139079
Dusp5	5.64849	0.00174421	0.0057862
Macc1	5.64034	8.95968e-09	6.85285e-08
Pcdhac2	5.63514	0.0134335	0.0356338
Pcdh8	5.61908	1.72198e-29	8.7413e-28
Pcdha7	5.61863	0.0238463	0.0590493
Adam2	5.6163	0.00338568	0.010502
Adamts6	5.60748	0.00888166	0.0247607
Ccdc19	5.60614	4.6615e-05	0.00020773
Galnt9	5.59676	2.97672e-14	4.15725e-13
Fam82a1	5.59327	2.19587e-14	3.11707e-13
Dnajb13	5.58804	1.2454e-08	9.35693e-08
Cpeb4	5.57542	0.0120496	0.0323749
Sh3rf3	5.56842	2.28794e-12	2.65668e-11
Prtg	5.5659	5.58699e-12	6.21543e-11
Clec2l	5.56387	2.64429e-12	3.04622e-11
Tpo	5.55176	6.30454e-05	0.000274916
Clstn1	5.53959	5.21058e-05	0.000230614
Napb	5.52852	6.73759e-08	4.6383e-07
Vwa2	5.52075	0.00551239	0.0162014
Mpzl3	5.51714	0.00180823	0.00598327
Rln3	5.4468	9.47147e-05	0.000401759
Arhgap36	5.43974	8.87664e-16	1.42459e-14
Cables2	5.43224	2.0448e-38	1.87985e-36
Six6	5.43004	3.15526e-10	2.89048e-09
Plcg2	5.42901	3.85652e-14	5.32862e-13
Tm6sf1	5.42195	4.3541e-06	2.28426e-05
Vgll4	5.4175	0.00393233	0.0120298
Cabp2	5.41566	0.0225551	0.0562457
Fam43b	5.41131	3.14598e-11	3.22431e-10
Spnb1	5.39175	1.41221e-19	3.24892e-18
Adamts4	5.38815	9.6547e-09	7.34833e-08
Ina	5.37976	0.00452064	0.0136121
Msx2	5.3796	4.80696e-05	0.000213886
Gpr137c	5.3794	0.00520386	0.0153992
Arap2	5.37695	2.64795e-47	3.86452e-45
B3gat1	5.36722	1.03295e-19	2.40946e-18
Exoc4	5.35539	0.00346952	0.010735
Pak1	5.35431	5.15446e-16	8.46426e-15
Tceal6	5.35122	1.08772e-34	8.08894e-33
Trp73	5.3493	0.0204981	0.0517154
Kcnv2	5.34428	0.010548	0.0287506
Mfsd12	5.33794	0.000180306	0.000721936
Gm15915	5.33661	0.0123332	0.0330379
Ltk	5.32695	9.45908e-14	1.25714e-12
Irx5	5.32427	0.000119375	0.000496618
Pls1	5.30033	3.32629e-48	5.07661e-46
Shb	5.2913	5.45519e-19	1.18387e-17
Gm5567	5.29105	2.46229e-06	1.34496e-05
Mark4	5.2901	0.00298388	0.00936638
Zfp109	5.28979	0.000523158	0.00193051
Accn2	5.28392	2.83365e-54	6.18397e-52
Scrt1	5.28243	1.80774e-13	2.34124e-12
Htr2c	5.26361	3.5127e-05	0.000159644
Kcnc3	5.2632	1.00905e-10	9.78499e-10
Sprtn	5.24884	0.000772078	0.00275167
Ccdc64	5.24428	0.00111941	0.00386278
Vip	5.24121	7.87504e-05	0.000337847
Pcdha3	5.23405	0.00995488	0.0273382
Lcor	5.2326	0.0192581	0.0489544
Haghl	5.22173	2.62658e-26	1.04131e-24
Hrasls	5.21995	1.77235e-32	1.15604e-30
Cbln3	5.21976	1.599e-11	1.69565e-10
Cryba2	5.20452	2.17159e-16	3.68791e-15
Inpp5j	5.19773	1.64489e-15	2.58827e-14
Gm833	5.19496	8.30539e-11	8.11593e-10
Lrrc10	5.18587	0.0136284	0.0360894
Fam189a1	5.18466	1.74444e-19	3.9741e-18
Ly9	5.17754	7.83044e-14	1.05146e-12
Asb15	5.15197	7.35609e-08	5.0373e-07
Grid2	5.15195	0.00195777	0.00642167
Gpr83	5.15171	2.73193e-05	0.000126549
Pla2g4e	5.14262	0.000157333	0.000637385
Atpaf1	5.13059	6.13429e-06	3.15302e-05
Cuzd1	5.12555	2.55815e-09	2.09304e-08
Slc38a11	5.12309	0.0003121	0.00119945
Nkx6-2	5.11817	6.91354e-11	6.82325e-10
Nhs	5.1178	0.00242998	0.0078061
Loxhd1	5.09858	0.0222895	0.0556903
Tdrd1	5.09287	0.00422241	0.0128181
Oxtr	5.09101	3.35635e-15	5.10248e-14
Olah	5.08874	1.76628e-05	8.43617e-05
Ppp1r3a	5.08208	3.96233e-11	4.01931e-10
Hpse	5.07195	9.34432e-13	1.12706e-11
Tmem28	5.06859	0.00872444	0.0243631
Sema7a	5.06832	2.11974e-42	2.313e-40
Kcnj3	5.06149	2.73714e-06	1.48294e-05
Cxcr3	5.05881	0.000811653	0.00288126
Mybl1	5.05454	0.00219766	0.00712248
B930018H19	5.04466	5.23054e-15	7.81935e-14
Klhl38	5.04012	0.000116409	0.00048532
Calb2	5.03578	1.29329e-16	2.23205e-15
Echdc1	5.03522	0.000845971	0.00299398
Cd3g	5.03278	4.18014e-06	2.2029e-05
BC030870	5.03083	0.00701124	0.0200686
Hs3st2	5.02421	2.13491e-45	2.8487e-43
Ripply2	5.01996	2.14326e-17	4.00058e-16
Strn	5.01332	3.1665e-05	0.000145067
Il2rb	4.99929	2.66437e-07	1.67472e-06
Nudt12	4.98904	0.00387518	0.0118706
Adcy8	4.98873	1.57961e-12	1.87046e-11
Grem2	4.98243	7.89689e-11	7.74792e-10
Iffo2	4.97181	4.01093e-31	2.30121e-29
C530008M17Rik	4.96877	5.05222e-22	1.42999e-20
Gimap3	4.96042	2.87591e-08	2.06886e-07
Dusp4	4.94929	1.39206e-05	6.76646e-05
Arid5b	4.94719	0.00255759	0.00817106
Myh10	4.94077	1.63639e-15	2.57836e-14
Prph2	4.93448	0.000533661	0.00196461
Gm6981	4.9308	1.73472e-07	1.1249e-06
Hist1h3f	4.91662	3.28456e-05	0.00015024
Sez6l	4.91566	2.22769e-16	3.77768e-15
Med12l	4.90164	1.84781e-05	8.80216e-05
Myl2	4.88862	1.07853e-14	1.57028e-13
Epn3	4.8869	2.69766e-46	3.81776e-44
Fblim1	4.88623	6.35955e-12	7.03134e-11
Slc38a1	4.87693	7.52851e-24	2.46216e-22
Crb1	4.87463	0.0382469	0.0893551
Gngt1	4.87455	0.00726588	0.0207061
Anxa13	4.8729	0.0182157	0.0466129
S1pr5	4.86835	5.08948e-07	3.07489e-06
Clnk	4.86589	0.00547007	0.0160952
Slc5a9	4.86117	0.0072641	0.0207035
Muc6	4.85745	0.0361117	0.085056
Gpc2	4.85593	7.5358e-13	9.21784e-12
Nr3c2	4.85175	0.000543386	0.00199716
Pde6h	4.83489	0.00174956	0.00580146
Gm9833	4.82176	0.000172293	0.00069318
Icam4	4.8176	1.09247e-06	6.30506e-06
E130006D01Rik	4.81323	2.96476e-16	4.96986e-15
Fads6	4.81263	6.60752e-05	0.000287216
Slc17a7	4.81241	1.54829e-10	1.46255e-09
Nsun7	4.80875	1.20243e-07	7.99715e-07
Tmem90b	4.80285	2.04063e-22	5.98627e-21
Folr4	4.79863	0.000151052	0.000613428
A330050F15Rik	4.78364	1.42175e-33	9.88076e-32
Nefm	4.78248	1.05982e-21	2.91152e-20
Plb1	4.77272	1.53332e-05	7.40223e-05
Rmst	4.75859	0.0131762	0.035039
Foxn3	4.74957	0.00282033	0.00891652
Ankrd5	4.74885	1.24321e-07	8.23786e-07
Moap1	4.7445	0.0078301	0.022133
6330410L21Rik	4.74448	1.25008e-05	6.12861e-05
1700067P10Rik	4.74291	0.0269284	0.0657472
Fanca	4.74208	0.000257945	0.00100673
Hbb-b1	4.73312	0.000553795	0.0020315
Lhx6	4.719	1.53235e-08	1.14028e-07
C1ql3	4.71627	3.93973e-08	2.79286e-07
Golga3	4.71423	1.59639e-09	1.34333e-08
Myrip	4.71134	1.54647e-24	5.37376e-23
Tnks	4.71119	0.000482533	0.00179535
Itga6	4.70994	0.000125379	0.000518526
Prm1	4.70747	0.0332596	0.0790478
Pcsk6	4.69542	5.52247e-18	1.09099e-16
Ctsw	4.6948	1.92552e-07	1.23524e-06
Psapl1	4.69298	0.0197522	0.0500146
Zbtb8b	4.68559	7.11546e-13	8.72195e-12
Atp8a2	4.67962	1.28692e-11	1.38228e-10
Gm16894	4.67576	0.00188364	0.00620657
Larp4b	4.66656	1.31823e-05	6.43704e-05
Pctp	4.65564	1.14788e-43	1.37457e-41
B3gnt4	4.65008	0.000684362	0.00246233
Cbl	4.64961	0.00467384	0.0140299
Zcchc6	4.63797	0.000142165	0.000580469
1300018J18Rik	4.62239	4.12173e-05	0.000185232
Asah2	4.62141	7.19732e-08	4.93727e-07
Gm12185	4.61649	4.09646e-05	0.000184274
Plcd4	4.61491	5.70541e-09	4.46921e-08
Pds5a	4.61338	0.000100778	0.00042547
Lrrc20	4.60663	7.40704e-13	9.06508e-12
F10	4.60318	0.0139	0.0367171
Gpr64	4.60077	1.20334e-14	1.7442e-13
Srd5a2	4.59993	0.00281745	0.00891081
Gpr25	4.59976	3.98191e-08	2.82105e-07
Shh	4.59751	2.61096e-16	4.40524e-15
Slitrk3	4.59741	5.62655e-07	3.38535e-06
Cpeb3	4.59426	2.9661e-14	4.1449e-13
Dgkq	4.59099	8.20666e-05	0.000351241
Krt12	4.58706	0.0383696	0.0895636
Nefh	4.58291	7.5441e-17	1.33053e-15
Slc16a5	4.58076	0.000118357	0.000492825
Gm20187	4.57735	0.0246803	0.0608821
Slc27a6	4.56769	5.19687e-07	3.1349e-06
Ctsg	4.56554	0.00933798	0.02586
2010-09-03	4.56191	1.10717e-36	9.16796e-35
Smap1	4.54899	0.000582362	0.00212713
Prss38	4.54838	0.0291946	0.0705644
Glg1	4.54689	0.000257251	0.00100469
Dlx4	4.54546	0.00107715	0.00372961
Gm9766	4.52736	0.0200866	0.0507786
4921530L21Rik	4.5271	0.0399139	0.0926286
Mum1l1	4.52262	8.22621e-11	8.04735e-10
Txk	4.52106	2.72855e-11	2.81424e-10
Fam5c	4.5187	2.30567e-10	2.13819e-09
Nkg7	4.51607	0.000953196	0.00333754
Slc6a17	4.51484	6.86582e-08	4.71957e-07
Palm3	4.5124	3.04805e-31	1.77052e-29
Crhr1	4.49278	7.05287e-14	9.51424e-13
Flt3	4.49163	1.29612e-16	2.23528e-15
Zfp618	4.4901	0.00273005	0.00865924
Dlg2	4.48676	1.63996e-15	2.58225e-14
Cstl1	4.48589	0.0259294	0.063594
Tmem210	4.47735	0.000130846	0.000539629
Pcdhga5	4.46877	0.0253316	0.0623044
Cerkl	4.46791	0.00148634	0.00500398
Otol1	4.46561	0.00414813	0.0126091
Kndc1	4.46434	1.81558e-18	3.7419e-17
Gm10789	4.46039	4.19511e-09	3.33651e-08
St8sia5	4.45321	1.41316e-09	1.19864e-08
F630042J09Rik	4.45152	0.000107003	0.000449167
Efr3a	4.44547	6.28349e-18	1.23299e-16
Fam83c	4.43782	0.00124757	0.00426656
Il18r1	4.43634	0.0104028	0.0283947
Lcp2	4.43627	1.25085e-15	1.98969e-14
Sec14l2	4.4358	1.87702e-19	4.26365e-18
Tmem150b	4.42271	3.67091e-05	0.000166252
Xlr4c	4.4213	1.63065e-07	1.06332e-06
Farp2	4.41855	0.00057454	0.00210086
Lyz1	4.41582	6.6701e-10	5.89305e-09
Slit3	4.41544	7.29488e-08	4.99979e-07
Acsl6	4.41373	3.41567e-06	1.82641e-05
Padi6	4.41258	0.0263288	0.064492
A730056A06Rik	4.40985	1.50279e-10	1.42417e-09
Unc5b	4.4003	5.48898e-32	3.43027e-30
Slco5a1	4.39855	4.8326e-38	4.3236e-36
Bglap	4.39288	0.0191535	0.0487151
Ninl	4.39105	4.91673e-13	6.1102e-12
Clstn3	4.38684	2.52552e-32	1.61571e-30
Lingo3	4.3826	1.32888e-08	9.95848e-08
Bglap2	4.38243	0.00125872	0.00429966
Nmnat1	4.37313	1.72033e-09	1.44035e-08
Gm6307	4.3727	0.0237909	0.0589193
Crkl	4.371	4.77174e-05	0.00021244
Agpat9	4.36739	3.35664e-22	9.72469e-21
Mib1	4.36679	0.000758371	0.00270775
Iqsec1	4.36084	1.46193e-13	1.90819e-12
Syce1	4.35729	0.000244869	0.000959387
Spsb4	4.35425	1.21969e-31	7.32158e-30
Hoxc8	4.35397	4.85552e-21	1.27106e-19
Tle6	4.35361	1.79809e-10	1.68623e-09
Stag3	4.35194	2.14923e-07	1.36562e-06
Vamp1	4.35034	2.01615e-12	2.35395e-11
Rab42	4.346	0.0252425	0.0621114
Gpr55	4.34472	0.0278447	0.067673
Cap2	4.34186	1.72847e-18	3.56866e-17
Nsg1	4.33915	1.63144e-33	1.1271e-31
Spock2	4.33329	2.39441e-05	0.000112093
Srp54a	4.3257	0.0109579	0.0297568
Gm10532	4.32557	0.0379217	0.0887106
Plcg1	4.32533	0.00204974	0.00668671
Zdhhc22	4.3249	0.00961335	0.0265344
Rph3al	4.32148	0.00575534	0.0168455
Fbxw10	4.32051	7.61067e-09	5.88271e-08
Shd	4.31866	4.83029e-14	6.61149e-13
Sv2b	4.31426	2.17839e-10	2.02418e-09
Hist1h1e	4.31055	0.00495454	0.0147587
Gls2	4.30517	8.80788e-13	1.06732e-11
Hipk4	4.30379	0.000706074	0.00253385
Sv2a	4.30312	1.56715e-17	2.95833e-16
Cd3d	4.28938	1.90761e-06	1.0616e-05
Nyap2	4.28454	0.00113396	0.00391008
Dcc	4.28317	2.89254e-11	2.97287e-10
Mcf2	4.28088	1.28368e-13	1.68589e-12
Ahcyl2	4.27653	3.41728e-09	2.75162e-08
Hoxc11	4.27638	0.000276648	0.00107488
Dok6	4.27185	0.00358656	0.0110663
Peg3	4.26977	0.0109842	0.0298212
Mcpt4	4.25779	0.0013087	0.00445344
Rapgefl1	4.25443	1.5727e-10	1.48441e-09
Myo18b	4.25279	0.00178774	0.00591966
Igj	4.24082	2.84022e-06	1.53488e-05
Cd7	4.24006	3.48647e-06	1.86214e-05
Rtn4rl2	4.23538	4.3513e-06	2.28331e-05
Ttc21a	4.22575	0.00169972	0.00565387
Stxbp5l	4.21923	2.06456e-22	6.04888e-21
Myf5	4.21858	0.0153098	0.0399618
Zcwpw1	4.21583	4.59001e-11	4.61789e-10
Hspb3	4.21463	7.05898e-06	3.59586e-05
4833403I15Rik	4.20079	0.0179152	0.0459258
Cst7	4.19876	0.0208425	0.052451
Tmprss6	4.1885	1.97296e-08	1.44876e-07
Scnn1a	4.18567	6.41552e-15	9.51168e-14
Rab11fip5	4.18478	1.11903e-09	9.6174e-09
Hhatl	4.18275	3.85124e-29	1.89726e-27
Sel1l2	4.182	0.000433961	0.00162783
Acacb	4.17462	5.72057e-19	1.23686e-17
Prss12	4.17143	3.25385e-36	2.62909e-34
Peli3	4.16873	0.00285778	0.00902272
Chchd10	4.16576	6.85837e-10	6.05252e-09
Gm7120	4.15772	0.00218552	0.00708903
Trim10	4.15755	0.00419688	0.012744
BC046331	4.15531	8.42147e-05	0.000359703
Exd1	4.15317	1.48494e-05	7.18799e-05
Tmem170	4.15005	1.96639e-09	1.63319e-08
Tph1	4.14886	0.00158395	0.00529973
6430548M08Rik	4.14844	1.38182e-08	1.03419e-07
B3galt2	4.14579	1.71728e-12	2.0222e-11
Ccdc88c	4.14182	0.000364685	0.00138806
Ribc2	4.14142	0.0422983	0.0970816
Zfyve9	4.13154	9.01059e-08	6.09697e-07
Ttc7b	4.12403	2.42371e-44	3.10967e-42
Pgr	4.11937	2.56272e-22	7.4616e-21
Lrp1b	4.11591	0.000211998	0.000839302
Gp5	4.11265	4.37354e-09	3.46075e-08
Gm13498	4.11094	0.00136122	0.0046167
Fam20c	4.10959	9.25127e-11	8.9936e-10
Bai2	4.10903	7.77603e-21	1.98013e-19
2310040G24Rik	4.10848	8.21359e-13	1.0005e-11
Pappa	4.10616	5.75249e-05	0.000252304
Uhrf1bp1	4.09076	3.50716e-21	9.27472e-20
Pnmal1	4.08242	2.27899e-06	1.25105e-05
6430571L13Rik	4.07968	5.17294e-32	3.2536e-30
Pvrl4	4.07773	2.98882e-30	1.59342e-28
Snx29	4.07495	0.00457142	0.0137508
Lrrc9	4.07304	0.000216255	0.000854447
Jag2	4.07039	6.21117e-08	4.29867e-07
Gabrr3	4.06963	4.77735e-10	4.29888e-09
Gm15612	4.06707	3.7156e-05	0.000168015
Frrs1l	4.05984	0.000407249	0.00153536
Esrra	4.05883	1.18868e-41	1.25031e-39
Myh8	4.05865	2.08708e-13	2.68515e-12
Gramd1b	4.05379	0.000537469	0.001978
Prdm11	4.05255	0.00386427	0.0118434
Mtap	4.05163	2.39106e-19	5.37896e-18
Wnt2	4.0512	1.45898e-09	1.23392e-08
Tenm1	4.04532	0.0047483	0.014226
Ckmt1	4.04012	1.1129e-09	9.56825e-09
Sphkap	4.03847	4.71242e-16	7.77117e-15
9530036O11Rik	4.03826	1.00774e-06	5.84056e-06
Phyhip	4.03602	3.58664e-10	3.26517e-09
Abi3	4.03421	2.28618e-05	0.000107306
Abcd2	4.03313	2.91002e-21	7.75706e-20
Fam13b	4.03098	0.000449959	0.00168219
Pcdh7	4.02868	5.1008e-07	3.08093e-06
Lnpep	4.01965	0.000196056	0.000780048
Msi1	4.01946	0.000614966	0.00223503
Uprt	4.01891	0.00429081	0.0130106
Zap70	4.00504	2.27137e-12	2.63874e-11
Ccdc65	3.99002	8.72231e-14	1.16585e-12
3200001D21Rik	3.98625	2.16954e-08	1.58019e-07
Pou4f3	3.98399	0.000321261	0.00123202
Nefl	3.98377	4.66765e-19	1.02055e-17
Gnmt	3.98196	1.08051e-11	1.17299e-10
Six4	3.97031	2.21804e-06	1.22039e-05
Ankrd11	3.96953	0.000203765	0.000808789
Pacsin2	3.96866	4.37605e-19	9.61291e-18
Rcbtb1	3.96392	6.08509e-46	8.40787e-44
Ano8	3.96324	6.55584e-07	3.89927e-06
B430212C06Rik	3.96012	2.01417e-14	2.87136e-13
Mrgprh	3.95939	0.0433914	0.0992587
Mc4r	3.95815	1.5036e-10	1.42436e-09
Ralgapa2	3.95673	5.96807e-18	1.17504e-16
Rerg	3.95241	7.9525e-09	6.12867e-08
Osbp2	3.95072	3.45343e-15	5.23983e-14
4933427D06Rik	3.94928	0.0389585	0.0906728
5730435O14Rik	3.94787	0.00191586	0.00630012
Slc44a3	3.93542	0.00624625	0.0180851
Etl4	3.93288	3.75948e-14	5.20686e-13
Ankrd52	3.93003	0.000111472	0.000466483
Kcns1	3.92955	4.95573e-13	6.15538e-12
Snrk	3.92519	5.92789e-09	4.6326e-08
Fam186b	3.92303	1.92281e-08	1.41416e-07
Lrrfip1	3.92158	2.3717e-24	8.13237e-23
Wnk3	3.91093	8.9329e-18	1.72962e-16
Adprhl1	3.90868	1.39649e-09	1.18537e-08
Apbb1	3.89678	5.42911e-08	3.79226e-07
Gimap7	3.89604	0.0062218	0.0180232
Arhgef3	3.88737	6.19144e-23	1.88969e-21
Plxna1	3.88156	8.40379e-12	9.213e-11
Sp9	3.87639	1.56546e-05	7.548e-05
Nkain3	3.87213	2.79366e-11	2.87885e-10
Prepl	3.86739	6.90143e-05	0.000299101
Cnnm1	3.85121	1.59172e-18	3.30092e-17
Sgpp2	3.85012	2.29851e-07	1.45651e-06
Pygo1	3.84669	2.22363e-05	0.000104475
Cdkn2b	3.84015	1.50712e-14	2.16171e-13
Tecpr1	3.83913	0.00049557	0.00183858
Syt12	3.83735	4.15051e-22	1.19244e-20
Usp9x	3.83255	0.0126584	0.0337852
Chst9	3.83193	9.04967e-12	9.88395e-11
Arg2	3.83114	7.8344e-08	5.35228e-07
Numb	3.8246	0.013381	0.0355067
Trim38	3.8232	1.45509e-06	8.2211e-06
Zfp551	3.82296	0.0172493	0.0443483
Epb4.1l1	3.82009	4.62049e-26	1.79224e-24
Atp6v0c	3.81395	0.00830906	0.0233343
H2-T22	3.80046	0.010456	0.0285232
Ctcfl	3.8004	0.0219334	0.0549124
Capsl	3.79976	3.01e-10	2.76175e-09
Rasl2-9	3.79813	2.16471e-08	1.57717e-07
Henmt1	3.79676	0.00247755	0.00794578
Cdr2l	3.79541	3.59321e-22	1.03843e-20
Fat3	3.7941	8.75704e-06	4.39341e-05
Caln1	3.79271	1.22644e-10	1.17419e-09
Rassf8	3.78726	0.000255287	0.000997692
Zfp385a	3.7831	1.90423e-15	2.9743e-14
Gm53	3.77368	1.22441e-12	1.46321e-11
Atp1a4	3.77022	1.7206e-05	8.23652e-05
Fam155a	3.77	3.06042e-34	2.2125e-32
Col17a1	3.76597	0.0388801	0.0905443
Zfp114	3.76123	0.0135205	0.0358363
Rgs1	3.75783	0.0056068	0.0164499
Grm4	3.75741	0.00818207	0.0230248
Treml4	3.75677	0.0150183	0.0392756
Nfasc	3.75223	1.99385e-20	4.91122e-19
Fam65b	3.74636	2.07717e-09	1.72122e-08
Lingo2	3.74398	3.82083e-16	6.33665e-15
Evi5l	3.74004	0.0214551	0.0538476
Slc22a23	3.73767	3.36657e-22	9.74136e-21
Asb13	3.73493	4.23e-19	9.33598e-18
Luzp1	3.73105	8.6288e-20	2.02504e-18
Crim1	3.72471	1.13311e-23	3.6698e-22
Cd2	3.7245	2.6547e-05	0.000123412
Mir3061	3.72257	6.81071e-09	5.28537e-08
Vipr1	3.72195	0.0336741	0.0799109
Colq	3.72118	3.97115e-22	1.14482e-20
Rps6ka3	3.71641	0.000199977	0.000794566
Adcyap1r1	3.71222	2.04204e-08	1.49432e-07
Tiam1	3.70644	1.28181e-17	2.43742e-16
Grhl2	3.70592	5.43437e-08	3.7948e-07
Zfp365	3.70575	6.19888e-23	1.88969e-21
Osbpl10	3.70087	4.47628e-07	2.72131e-06
Lrrc14b	3.7007	1.97738e-10	1.84548e-09
4932441J04Rik	3.69903	9.78704e-06	4.87494e-05
Ppargc1a	3.69835	5.60712e-34	4.01632e-32
Krt222	3.69797	6.21708e-12	6.88034e-11
Cdh8	3.69762	2.68816e-09	2.18944e-08
BC037032	3.69532	1.39099e-05	6.76267e-05
Thrsp	3.69416	3.54866e-13	4.47918e-12
Ido2	3.69336	6.58904e-11	6.51952e-10
1700091E21Rik	3.68977	0.00481833	0.0144062
Slc12a1	3.6894	1.34766e-05	6.57252e-05
Bmp2	3.68629	3.8663e-09	3.09503e-08
Srl	3.68258	8.8874e-13	1.0764e-11
D930020B18Rik	3.68116	0.0212104	0.0532965
Cidea	3.68107	3.84043e-11	3.90413e-10
Clrn1	3.68067	6.9816e-13	8.57136e-12
Nebl	3.67816	0.0021888	0.0070987
Tcp10b	3.6771	0.0164083	0.042506
Efna3	3.67313	0.000388942	0.00147341
Chst8	3.67275	1.02635e-25	3.8593e-24
Fgd1	3.67185	0.0323248	0.0771007
Wscd1	3.66629	2.10064e-09	1.74005e-08
Aifm3	3.66032	4.36064e-22	1.24786e-20
Pgam2	3.65658	0.00235433	0.00758497
Tmem229b	3.65463	1.41702e-25	5.26892e-24
Bend7	3.65092	3.02557e-13	3.84385e-12
Gm10658	3.64456	0.00976947	0.0268986
Pof1b	3.64028	0.000799903	0.00284116
Chgb	3.63659	2.03088e-08	1.48708e-07
Faim2	3.63585	5.66999e-08	3.9487e-07
Taf6l	3.6338	0.00178104	0.00589916
Opa3	3.63266	0.0121294	0.0325668
Gas2l2	3.63128	6.3415e-06	3.25308e-05
Hs3st6	3.62866	9.84282e-14	1.30591e-12
Ccdc157	3.62703	1.51207e-11	1.60784e-10
Aldoart1	3.62634	0.00544329	0.0160326
Iqch	3.62317	0.000145506	0.000593278
Il7r	3.62192	0.00181286	0.00599688
Ttbk1	3.61552	4.42964e-07	2.69436e-06
Dpysl3	3.61324	0.0022213	0.00719011
Lynx1	3.60855	3.56859e-08	2.54443e-07
Pdilt	3.60828	0.00075644	0.00270169
Snph	3.60629	7.83713e-16	1.26647e-14
Rims1	3.6055	0.00898875	0.0250186
Shroom3	3.60385	1.0047e-20	2.53629e-19
Tshr	3.60228	1.09518e-06	6.31757e-06
Strbp	3.60072	3.90946e-23	1.21558e-21
Sacs	3.60027	0.00601088	0.0174904
Ptprcap	3.59826	5.32074e-05	0.000234956
Gm4956	3.59597	0.0222828	0.0556795
Aldh1l2	3.59302	2.35209e-09	1.93529e-08
Polh	3.59174	4.14364e-06	2.18514e-05
Kcnd2	3.58879	6.51183e-10	5.75759e-09
Plekhh1	3.58772	0.000775254	0.0027617
Adcy3	3.58696	0.0161734	0.0419814
1700112E06Rik	3.57916	0.000199235	0.000791889
Fndc4	3.57189	2.00273e-13	2.58231e-12
Nlrp10	3.57113	0.000427332	0.00160506
Cbln2	3.57036	7.74795e-22	2.15128e-20
Hspb6	3.56377	0.000158262	0.000640814
Epm2a	3.56368	0.0418369	0.0962332
Vps13c	3.56284	0.000609783	0.00221797
Gm19461	3.5627	1.05447e-07	7.08163e-07
Frmpd1	3.55522	5.2543e-07	3.16791e-06
Exoc3l	3.55449	0.000924073	0.00324335
Pnmal2	3.55152	4.57932e-32	2.89788e-30
Gata4	3.55141	0.000231911	0.000912289
Sik3	3.55134	7.04526e-22	1.96787e-20
Sowaha	3.54736	3.24915e-09	2.62257e-08
Fam73b	3.53938	5.02467e-23	1.5479e-21
Fgf1	3.53915	1.65311e-09	1.38756e-08
Plekha2	3.53547	5.08869e-33	3.44423e-31
Gm5860	3.53155	4.55661e-05	0.000203289
Scn1a	3.52778	2.45656e-18	5.00551e-17
Rasgrf1	3.52743	1.96422e-16	3.34793e-15
C2cd4a	3.52711	0.00402198	0.0122704
Cyb5d1	3.51578	0.00613209	0.0177965
Cd27	3.51341	0.000553832	0.0020315
Gas6	3.51215	1.8119e-26	7.26969e-25
Plekhd1	3.51024	8.00328e-31	4.47092e-29
Arhgap44	3.50467	4.41141e-25	1.58723e-23
Hmga1	3.50312	0.0428595	0.0981958
Dgkb	3.50218	7.6289e-09	5.89485e-08
Grlf1	3.50143	5.86017e-22	1.64472e-20
Adcy9	3.49505	0.0118681	0.0319607
Oxr1	3.49467	1.86238e-07	1.19836e-06
Ppifos	3.48585	0.030724	0.0737118
Klc2	3.48342	5.30098e-06	2.7538e-05
Trim23	3.48319	2.58897e-05	0.000120727
Cntn5	3.47185	0.000138936	0.000569274
Hcn2	3.47076	5.32385e-12	5.93683e-11
Il12rb2	3.47057	0.000121414	0.000504202
4930455C13Rik	3.47021	0.0272945	0.0665366
Eml6	3.46877	0.00168172	0.00560116
C2cd4c	3.46854	1.53688e-15	2.42557e-14
Amph	3.46757	2.71854e-07	1.70601e-06
Syt3	3.46368	4.40506e-28	2.00903e-26
Masp1	3.46069	0.0127425	0.0339823
Fgf10	3.45972	0.000389698	0.00147533
Efnb2	3.45963	4.29824e-36	3.46097e-34
1700025F24Rik	3.45941	3.44137e-05	0.000156738
Epb4.1l4a	3.45782	6.23477e-17	1.10798e-15
Tsen54	3.455	3.59148e-28	1.64763e-26
Gcnt4	3.45459	8.3033e-09	6.37168e-08
Ccnt1	3.44963	0.0304333	0.0731421
Slc36a4	3.44809	0.00835102	0.0234324
Aen	3.43709	1.92864e-11	2.02498e-10
Cabp1	3.4366	2.11804e-07	1.34727e-06
Hpn	3.43317	1.64167e-09	1.37845e-08
Cdca7l	3.432	2.15317e-09	1.78104e-08
Rab7	3.42562	0.0063412	0.0183327
Lgi2	3.42273	8.87517e-06	4.44444e-05
Sag	3.41909	1.49928e-06	8.45852e-06
Ctif	3.41473	3.8076e-07	2.3367e-06
Stk31	3.41151	6.72355e-06	3.44e-05
Fam171b	3.4078	0.0044043	0.013315
Arhgef4	3.40499	5.17081e-10	4.62796e-09
Ablim2	3.40406	4.37409e-22	1.25018e-20
Chst15	3.40273	1.9596e-09	1.62842e-08
Fan1	3.40139	0.00529245	0.0156297
Lingo4	3.4009	0.000295165	0.00113943
Sfrp2	3.39913	8.00703e-05	0.000343194
Slc18a1	3.39894	9.41992e-07	5.48135e-06
Mef2a	3.39794	0.00109124	0.00377505
Pawr	3.39762	1.88509e-07	1.21197e-06
Vav3	3.39608	6.82769e-09	5.29679e-08
Cep290	3.39415	2.47202e-07	1.56011e-06
Tubgcp4	3.38967	0.000166818	0.000672893
Shank1	3.379	0.000432097	0.00162139
Tpsb2	3.37898	0.00448735	0.013524
Gc	3.37731	0.00253049	0.00809334
Klhl11	3.37595	0.00815238	0.0229523
Scrn1	3.37171	1.09115e-10	1.05331e-09
Has1	3.3623	1.76607e-05	8.43617e-05
Lgi3	3.3599	2.73853e-07	1.71763e-06
Tceal5	3.35893	4.29637e-11	4.33742e-10
Rgs12	3.35584	2.54633e-20	6.22612e-19
Ppip5k1	3.35389	1.01501e-17	1.95234e-16
Wls	3.35209	1.93046e-11	2.02599e-10
Pcdhga7	3.35165	0.0404747	0.0936972
Ajap1	3.35085	0.0014541	0.00490463
BC055111	3.34853	3.10802e-05	0.000142584
2310034O05Rik	3.34596	0.000493215	0.00183101
Ppm1h	3.3444	3.85482e-19	8.52404e-18
Fn3k	3.34313	1.35042e-17	2.56371e-16
Tuba4a	3.34179	1.61601e-07	1.05436e-06
Asb2	3.33886	2.6242e-09	2.14108e-08
Hist3h2bb-ps	3.3333	0.0150034	0.0392456
Iqsec3	3.33229	5.48574e-11	5.47659e-10
Fam53b	3.33043	3.27882e-25	1.18703e-23
Ldhb	3.32992	9.72628e-08	6.55843e-07
Angpt4	3.32741	5.45008e-05	0.000240213
Chst5	3.32708	8.85717e-15	1.3016e-13
Igsf21	3.32215	4.25919e-20	1.02111e-18
Rpe65	3.31762	0.0354696	0.0837378
Jsrp1	3.31686	0.000139064	0.000569598
Sync	3.31459	0.0144874	0.0381179
Csmd3	3.31334	6.01747e-06	3.10185e-05
Dnahc5	3.30852	0.00285399	0.00901442
P2rx5	3.30795	1.12368e-18	2.35328e-17
Ccdc80	3.30743	6.34263e-09	4.9336e-08
Ky	3.3055	1.23989e-07	8.22062e-07
6330549D23Rik	3.30408	6.05928e-08	4.19977e-07
Creb5	3.30067	0.0399795	0.0927714
Cacng2	3.30006	0.000500898	0.00185629
D130017N08Rik	3.29828	0.00979846	0.0269625
Prickle2	3.29787	4.71554e-21	1.23583e-19
A530050N04Rik	3.29737	2.21153e-05	0.000103948
Nek2	3.2956	9.27417e-05	0.000393962
Dsp	3.29472	0.00363781	0.0112096
Slc8a3	3.29428	2.80292e-10	2.57986e-09
Pik3r5	3.29409	3.54024e-15	5.36806e-14
Btbd8	3.29337	0.0376854	0.0882286
Rps6ka1	3.29172	1.118e-15	1.78445e-14
Tomt	3.28906	1.61483e-06	9.07094e-06
Fgf9	3.28867	1.38981e-14	2.0033e-13
Gm2762	3.2864	0.023282	0.0577867
Htr1d	3.28577	3.8855e-18	7.79471e-17
Clec16a	3.28404	1.19552e-14	1.73502e-13
Bai1	3.28395	4.40017e-14	6.04402e-13
Aifm1	3.28354	3.45444e-12	3.93295e-11
Cep350	3.28202	2.23533e-09	1.84508e-08
Tigit	3.28189	0.0164986	0.0427116
Btnl6	3.28146	0.00834419	0.0234189
Hoxa9	3.28092	0.000312487	0.00120074
Zfp169	3.28079	9.03337e-06	4.51785e-05
Tmem217	3.28012	0.0161392	0.0419066
Tbck	3.2784	0.00248948	0.00798075
4922501C03Rik	3.27673	0.000319278	0.00122522
Rprd1a	3.27514	4.48969e-05	0.000200495
Mgst3	3.27202	1.76918e-15	2.77448e-14
Kdm4d	3.26954	0.0173581	0.0446102
Itpka	3.2666	0.00059286	0.0021631
Lat	3.26544	0.00891833	0.0248481
Slc24a5	3.26442	0.00331564	0.010297
Kcnh2	3.26083	1.44806e-21	3.94097e-20
Fam98c	3.26045	4.67642e-12	5.24502e-11
Igfals	3.26024	5.07677e-06	2.64379e-05
Ung	3.25781	8.58644e-10	7.4898e-09
Sv2c	3.25672	7.42323e-05	0.000319874
Sapcd1	3.25512	4.72563e-11	4.7482e-10
Nacc2	3.25107	8.11718e-07	4.77012e-06
Atf3	3.25081	0.000445381	0.00166668
Fgf14	3.24852	2.02611e-08	1.48452e-07
4930417O13Rik	3.24751	0.0181952	0.0465822
Ache	3.23976	4.90637e-13	6.10057e-12
Opcml	3.23226	1.0438e-16	1.81352e-15
Csl	3.23182	0.000975146	0.00340725
Etohi1	3.23077	1.0957e-07	7.33953e-07
Fut7	3.22884	1.46111e-08	1.09005e-07
Itga2	3.22875	0.0178558	0.0457887
Ttll7	3.22818	9.31684e-05	0.000395631
Padi3	3.22804	0.0151849	0.0396582
Mcin	3.22695	0.0365665	0.0859452
Nckap1	3.22474	0.000478433	0.00178152
Clspn	3.22347	0.00250435	0.0080245
8430408G22Rik	3.22125	4.63825e-12	5.20774e-11
Acsm3	3.22115	0.0427564	0.0980013
Cma1	3.21948	0.00130739	0.00445028
P2rx6	3.21781	7.83656e-23	2.36729e-21
Prkab2	3.21531	0.000140524	0.00057457
Hax1	3.21486	1.29399e-05	6.32663e-05
Acvr1b	3.213	0.00319366	0.00994827
Zkscan2	3.21122	0.000868373	0.00306583
Ppp1r9a	3.21004	7.36842e-21	1.88044e-19
Mtx3	3.20879	1.22448e-33	8.58643e-32
Dip2a	3.20638	1.50189e-16	2.58062e-15
Depdc5	3.20512	8.02958e-31	4.47491e-29
Pde4a	3.2037	7.89127e-16	1.27434e-14
Pgf	3.19936	3.1812e-17	5.82237e-16
Fam13a	3.19674	3.47146e-11	3.54137e-10
Efcab2	3.19432	1.57626e-07	1.03044e-06
Npy5r	3.19389	0.000104806	0.000440565
Xcl1	3.1917	0.00208843	0.00680341
Slc1a1	3.19131	9.62095e-12	1.04834e-10
Zfp454	3.18883	1.8387e-06	1.02618e-05
Trim63	3.18735	0.00124892	0.0042696
Chd3	3.18644	0.00272518	0.00864967
Wisp1	3.17849	2.81405e-11	2.89858e-10
Vsnl1	3.1781	4.32972e-07	2.63771e-06
Pthlh	3.17646	1.94473e-08	1.42893e-07
Dnaic2	3.17646	1.14724e-07	7.66065e-07
Dennd5b	3.1763	7.93855e-13	9.70032e-12
4632415K11Rik	3.17384	2.02764e-09	1.68257e-08
Cachd1	3.17257	0.0017141	0.00569602
Srp54c	3.172	0.000568043	0.00207938
Gabra2	3.16967	0.0015527	0.00520188
Klhl3	3.16914	0.0266407	0.0651673
Gm13446	3.16545	4.88841e-10	4.39374e-09
Jakmip2	3.16531	1.82762e-05	8.70954e-05
Endod1	3.1583	5.57333e-08	3.88486e-07
Atg9b	3.15817	3.96327e-09	3.16722e-08
Lmtk2	3.1523	5.61178e-20	1.33715e-18
Cyp2u1	3.14759	1.87909e-06	1.04722e-05
Dopey1	3.14681	0.00150539	0.00506225
Trim16	3.14595	5.69913e-11	5.67749e-10
Cygb	3.14496	4.58518e-22	1.30731e-20
Ksr1	3.14397	0.0154583	0.0403224
Dlx5	3.14342	0.0094887	0.0262431
Gatad2b	3.14201	0.0262437	0.0642973
Sit1	3.14052	0.00302437	0.00947947
Synm	3.14022	5.15919e-07	3.11459e-06
Cthrc1	3.13929	8.00251e-11	7.84495e-10
Pcnxl2	3.1387	6.27603e-19	1.3507e-17
Gpr98	3.13797	0.00105631	0.00366726
Taco1	3.13744	1.0378e-07	6.97576e-07
Ppif	3.13451	1.82927e-31	1.0869e-29
Kpna2	3.13232	0.037532	0.0879223
Vwa7	3.13031	8.73353e-17	1.52991e-15
Cdh18	3.12941	1.60683e-09	1.35162e-08
Tmem53	3.12802	2.099e-19	4.754e-18
Rassf4	3.12636	3.22015e-08	2.30514e-07
Dlc1	3.12473	1.83409e-23	5.77974e-22
Adam7	3.12253	0.000795168	0.00282747
Cdr1	3.12252	0.0070697	0.0202062
Arhgap24	3.12089	3.12099e-15	4.76017e-14
Cdh7	3.12072	8.73491e-06	4.3836e-05
Vipr2	3.11851	0.000591833	0.0021597
Rassf6	3.11629	7.68788e-08	5.2568e-07
E130310I04Rik	3.11572	0.000676965	0.0024391
Sntg1	3.11562	2.36223e-06	1.29454e-05
Fam131c	3.11285	0.00203518	0.00664571
Gltpd1	3.1102	3.52575e-19	7.8186e-18
Htr7	3.1075	1.58301e-08	1.17498e-07
Fh1	3.10628	4.73957e-13	5.9089e-12
Esr1	3.10621	0.00353899	0.0109383
Supt16h	3.105	3.71956e-07	2.28868e-06
Mylk2	3.10459	0.00898807	0.0250186
Hnrnpa1	3.10283	0.00116045	0.00399199
Gm5113	3.10214	2.65634e-06	1.44285e-05
Acot6	3.10058	0.0306631	0.0735931
Inppl1	3.098	1.74587e-24	6.04863e-23
Pard3	3.09782	3.65548e-21	9.64509e-20
Bcar3	3.09632	8.86381e-18	1.71767e-16
Klrg1	3.09609	0.0422086	0.0969329
Dnahc17	3.0922	1.29129e-05	6.31476e-05
Fev	3.09049	0.00435474	0.0131805
Zfp423	3.08891	4.48479e-25	1.61115e-23
Ppargc1b	3.08348	1.06543e-08	8.08279e-08
Ctnnbl1	3.08328	8.46695e-13	1.02814e-11
Gm10584	3.083	2.78905e-06	1.50932e-05
1700071M16Rik	3.08005	0.0224186	0.0559471
Gm9899	3.07459	2.07872e-06	1.14861e-05
Sptssb	3.0736	1.55711e-12	1.84663e-11
Map4k2	3.07275	4.20346e-08	2.97169e-07
Cand2	3.07265	6.04114e-06	3.11268e-05
Rec8	3.07192	0.0105136	0.0286636
Rpl3l	3.06848	3.00611e-05	0.000138317
Aldoc	3.06802	1.19848e-06	6.87274e-06
Mtap1b	3.06734	6.4659e-10	5.71914e-09
Kcnip1	3.06631	1.02719e-07	6.90838e-07
A330070K13Rik	3.06563	0.0132573	0.0352226
Cited2	3.06508	3.21978e-13	4.0795e-12
Pacsin1	3.06506	3.40385e-05	0.00015512
1700001K19Rik	3.06396	0.000434022	0.00162783
Cdkn2d	3.06225	3.21379e-09	2.59582e-08
Il1r1	3.06218	1.5566e-10	1.46981e-09
Cnst	3.06115	1.53612e-19	3.5201e-18
Aak1	3.06074	5.49445e-18	1.08637e-16
Idh3g	3.05648	1.06816e-07	7.16744e-07
Trhr	3.05631	9.9832e-06	4.96418e-05
Kcna2	3.054	2.02627e-06	1.12281e-05
Maged2	3.05211	7.07857e-09	5.48413e-08
Tmem151b	3.04802	0.000150362	0.000610945
Ephb1	3.04717	3.92663e-10	3.56496e-09
Myom1	3.04716	9.14796e-10	7.93514e-09
Arhgef17	3.04711	2.15477e-12	2.51078e-11
Osbpl6	3.04692	8.7545e-21	2.22444e-19
Mtfp1	3.04004	2.39115e-15	3.6904e-14
Zscan29	3.04004	1.56057e-22	4.59531e-21
Adra1b	3.03953	1.34438e-06	7.64184e-06
Nrg1	3.0395	9.10337e-12	9.93795e-11
Rnd1	3.03887	5.83842e-08	4.05512e-07
Dzip1l	3.03885	5.03158e-11	5.0426e-10
Ubxn2a	3.03788	2.85636e-05	0.000131999
Bcat1	3.03781	7.71785e-27	3.18972e-25
Accsl	3.03742	1.22821e-05	6.02902e-05
Lonp1	3.03725	6.73356e-27	2.79778e-25
Pnpo	3.03517	5.38942e-20	1.28548e-18
Glipr1	3.03419	0.00155225	0.00520111
Arhgef9	3.02883	9.64817e-09	7.34576e-08
3110021N24Rik	3.02731	0.027922	0.0678185
Grtp1	3.02719	9.16696e-07	5.34209e-06
Sdk2	3.02581	0.0270304	0.0659616
Ryr2	3.02251	1.6261e-09	1.36597e-08
Clvs1	3.02149	0.00702245	0.0200933
Ihh	3.01951	0.00067346	0.00242759
Tcam1	3.0193	4.61937e-06	2.41854e-05
Lcp1	3.01761	4.31294e-19	9.48319e-18
Nmt2	3.01563	0.00262844	0.00837906
Pdpr	3.01516	0.000796409	0.00283102
Siah3	3.01382	0.00240262	0.00772459
Slmo1	3.01054	3.53121e-09	2.83554e-08
Calr3	3.00974	6.48684e-12	7.15851e-11
Lonrf2	3.00906	0.000240201	0.000942678
Dnahc10	3.00884	1.39363e-07	9.16951e-07
Ypel4	3.00594	0.00128823	0.00439401
Klf9	3.00531	0.00746362	0.0212178
Fam57b	3.00411	6.45079e-06	3.30479e-05
Ttbk2	3.00121	1.72819e-18	3.56866e-17
6820408C15Rik	3.00112	1.91609e-08	1.40966e-07
Fbxo31	3.00049	1.32432e-06	7.53696e-06
Lrrc47	2.99589	3.37396e-06	1.80576e-05
Slc7a15	2.9953	3.94966e-07	2.42069e-06
Tmem47	2.99438	1.12993e-18	2.36425e-17
Slc25a25	2.98914	2.63059e-27	1.14603e-25
Cplx1	2.98742	6.24813e-10	5.54121e-09
Bmpr2	2.98647	0.0104887	0.0286056
Zcchc4	2.98445	0.000943804	0.00330664
Stc2	2.98261	0.00795099	0.022434
Usp34	2.97989	0.00105467	0.00366211
Ppp1r16b	2.97717	6.63641e-13	8.16474e-12
Tnfsf14	2.97462	0.0286931	0.0694818
Fut9	2.97429	8.43201e-07	4.94341e-06
C030006K11Rik	2.97194	1.10576e-18	2.31782e-17
Ppip5k2	2.97027	1.15611e-28	5.50945e-27
Me2	2.96702	1.71237e-14	2.4471e-13
4933411G11Rik	2.96668	0.00183065	0.0060489
Stk39	2.96355	2.74946e-18	5.57799e-17
Pcdhb8	2.96265	0.0104436	0.028496
Zar1l	2.96196	0.0187061	0.0477124
A730085A09Rik	2.96161	9.60147e-05	0.000406756
A730020M07Rik	2.95945	0.000175397	0.000704333
Jak1	2.95787	2.67053e-06	1.44888e-05
Gba2	2.95713	5.17863e-10	4.63319e-09
Oprl1	2.95553	1.82469e-11	1.92015e-10
Pcdh11x	2.95377	1.84202e-08	1.35816e-07
Lrp11	2.95293	3.15058e-23	9.84862e-22
Pygb	2.9521	2.08057e-07	1.3256e-06
2310067B10Rik	2.9504	1.16197e-19	2.69446e-18
Pm20d1	2.95026	0.00165616	0.00551997
Kank4	2.94941	2.94705e-21	7.83788e-20
Nrip3	2.94875	1.88205e-18	3.87204e-17
C030034I22Rik	2.94789	1.25514e-05	6.14956e-05
Fgf21	2.94783	0.0155321	0.0404922
Specc1	2.94754	9.02915e-10	7.84082e-09
Clip1	2.94732	3.71609e-06	1.97754e-05
Fbxo41	2.9446	3.41311e-13	4.31042e-12
Stub1	2.94442	1.39968e-08	1.04656e-07
Mmp13	2.94385	0.0394495	0.0916717
Fhdc1	2.94194	3.69081e-14	5.11782e-13
Brsk1	2.94141	4.63882e-12	5.20774e-11
Mir196b	2.93897	0.0253272	0.0623001
Pyroxd1	2.93886	1.71564e-06	9.6095e-06
1700007K13Rik	2.93801	0.000112876	0.000471597
Racgap1	2.93789	1.82744e-15	2.86201e-14
Mrpl3	2.93699	3.35693e-05	0.000153161
Osbpl1a	2.93675	1.7662e-10	1.65966e-09
Cyp2s1	2.93634	1.79876e-07	1.16094e-06
Rnf222	2.93543	0.0166141	0.0429535
Qprt	2.93521	9.27241e-06	4.63144e-05
Hspa12a	2.93495	5.50702e-05	0.000242631
Nuak1	2.93494	4.8035e-22	1.36622e-20
Tanc2	2.93455	4.40759e-19	9.67309e-18
Lrriq3	2.93394	0.000818109	0.00290241
Lrrk2	2.93321	1.85274e-10	1.73469e-09
Tnfrsf23	2.93303	4.51496e-08	3.18036e-07
Ppp6r2	2.92908	2.25777e-09	1.86294e-08
Gm9866	2.92872	2.71228e-10	2.50235e-09
Fam210a	2.9266	6.7209e-24	2.21354e-22
Epha1	2.92519	4.25669e-08	3.0075e-07
Bckdhb	2.92067	6.9885e-23	2.12209e-21
Fcrlb	2.92041	3.88131e-08	2.75395e-07
Lrp3	2.91832	5.3926e-05	0.000237859
Eml2	2.91756	3.00647e-06	1.62097e-05
Ttc39b	2.91713	5.1444e-21	1.33921e-19
Cacna2d4	2.91491	0.0126352	0.0337386
Pdp2	2.91455	0.000119558	0.000497291
Synj1	2.9143	1.05755e-18	2.22075e-17
Trim66	2.91303	1.46023e-08	1.08974e-07
Tmem126b	2.91135	8.99328e-14	1.19864e-12
Pdzd8	2.908	5.87282e-22	1.64629e-20
Auh	2.9078	1.19927e-19	2.77819e-18
Got1	2.9075	1.70231e-06	9.53941e-06
Olfm2	2.90434	2.27718e-15	3.52612e-14
B230120H23Rik	2.90154	5.82796e-19	1.25892e-17
4930520O04Rik	2.89973	0.00404256	0.0123186
Rab3ip	2.89541	2.55236e-26	1.01361e-24
Shmt1	2.89457	0.000584446	0.00213374
Gabrg1	2.8929	1.2064e-20	3.02911e-19
Slc45a4	2.88999	1.6996e-08	1.25911e-07
Tbc1d24	2.8887	8.01417e-12	8.79412e-11
Ppp1r3e	2.88668	0.000216072	0.000853865
Hormad2	2.88461	0.00161994	0.00541164
Blm	2.88343	1.19498e-07	7.95664e-07
Ulk1	2.88103	1.22815e-11	1.32159e-10
Tnik	2.87874	4.20931e-22	1.20603e-20
Ufsp1	2.8769	4.47008e-17	8.03549e-16
Cntnap3	2.87619	0.00196284	0.00643561
Ak5	2.8752	1.35575e-10	1.29164e-09
Zfp251	2.87026	6.16084e-07	3.68215e-06
Pde6a	2.86878	0.0173732	0.0446393
Wnk2	2.86605	9.02179e-05	0.00038401
Ypel2	2.86502	3.60551e-14	5.01145e-13
Dffa	2.86436	1.15208e-05	5.67915e-05
Plcb2	2.86274	0.000135839	0.00055894
Bin2	2.86042	0.00437989	0.0132515
Nxpe3	2.85918	2.05498e-27	9.01991e-26
Tbc1d8	2.8588	1.58152e-12	1.87177e-11
Lrch3	2.85752	0.0388296	0.0904539
Sult2b1	2.85663	1.35498e-06	7.69947e-06
Kif4	2.84986	0.000841719	0.00297983
Cyc1	2.84898	2.67559e-05	0.00012426
Gem	2.8478	3.67441e-07	2.26448e-06
Uqcrc1	2.84491	1.37998e-05	6.71753e-05
Mctp2	2.84462	9.71009e-13	1.16937e-11
Prrc2b	2.84383	7.79484e-10	6.82992e-09
Fbxo32	2.84335	7.83675e-19	1.66209e-17
Sema4g	2.84292	5.72461e-07	3.43904e-06
Tas1r1	2.8424	0.00037672	0.00143037
Aars	2.84232	8.57815e-17	1.50608e-15
Sepsecs	2.83791	0.00775167	0.0219405
D5Ertd579e	2.8355	1.47624e-27	6.5411e-26
Fchsd1	2.83402	7.79547e-16	1.26061e-14
Slc35f3	2.83301	1.04893e-17	2.01592e-16
Rgs7bp	2.83275	0.00192388	0.00632293
Ube2v1	2.83122	0.005958	0.0173646
Spnb4	2.83082	1.29784e-21	3.5487e-20
Gm5535	2.82971	0.04317	0.0988103
Tacr3	2.82844	0.000213118	0.000843333
Rbm19	2.82838	1.78262e-10	1.67343e-09
Pank4	2.82816	1.4115e-05	6.85521e-05
Mapk8ip3	2.82298	3.21298e-06	1.72395e-05
Arpp21	2.82208	2.76435e-15	4.24115e-14
Suclg1	2.82079	0.000145078	0.000591637
Hoxb9	2.82022	2.50715e-12	2.89681e-11
Mark1	2.81975	1.12905e-26	4.64162e-25
Sphk1	2.81937	2.85037e-16	4.78841e-15
4930404N11Rik	2.81847	6.69974e-06	3.42857e-05
Inpp5e	2.81534	0.00142023	0.00479802
Slc18a2	2.81442	3.05322e-08	2.19008e-07
Myom3	2.81326	0.000249883	0.000977552
Ifitm10	2.81247	0.00829396	0.0232975
Arhgap5	2.80696	0.000214348	0.000847769
Vsig8	2.80657	0.00194709	0.00639112
Lrrc17	2.80647	3.11868e-06	1.67644e-05
Nav3	2.80387	0.00948503	0.0262361
Rapgef2	2.80235	2.73712e-13	3.48498e-12
Extl1	2.80023	1.0804e-07	7.24329e-07
Fam219a	2.79801	0.000927644	0.00325442
Cpa3	2.79729	0.0021449	0.00696892
Klf12	2.79623	0.00114367	0.0039389
Gm16532	2.79423	1.86077e-05	8.85824e-05
Ppp1r12a	2.79373	0.000704332	0.00252912
Ankrd34a	2.79303	1.05852e-07	7.10683e-07
Ccdc148	2.7921	1.60091e-07	1.04567e-06
Eya2	2.79074	2.06211e-07	1.31528e-06
Dennd4b	2.78948	1.79044e-23	5.65746e-22
Capn3	2.78887	0.000522389	0.00192859
Nat8l	2.78877	2.52115e-07	1.58769e-06
Spire2	2.78839	4.62114e-06	2.41892e-05
Rgl1	2.78745	8.63146e-13	1.04649e-11
Fam81a	2.78616	4.66887e-05	0.000208019
Car12	2.78557	0.00870549	0.0243189
Kcna1	2.78202	7.97572e-06	4.02683e-05
Kcnq3	2.77573	8.21185e-05	0.000351392
Tyro3	2.77466	1.43488e-08	1.0715e-07
Cntnap2	2.77251	7.90576e-16	1.27491e-14
Camk2b	2.77042	9.2683e-20	2.17075e-18
1700023L04Rik	2.77039	9.13652e-05	0.000388468
Ankrd35	2.76967	8.8427e-11	8.60716e-10
Ndel1	2.76809	1.16428e-08	8.78139e-08
Adarb1	2.76601	6.90751e-19	1.47573e-17
Syngr1	2.76457	6.74435e-05	0.000292836
Sgip1	2.76298	0.00206213	0.00672431
Abcg4	2.76213	0.000799823	0.00284116
Jhdm1d	2.76014	6.67353e-15	9.88792e-14
Ermp1	2.75941	1.92317e-16	3.28035e-15
Rhod	2.75834	6.80348e-06	3.47708e-05
Pkd2l2	2.75779	2.82054e-06	1.5253e-05
Podxl2	2.75586	4.22872e-13	5.30602e-12
Klhl32	2.75515	3.71395e-06	1.97685e-05
4430402I18Rik	2.75512	8.2368e-07	4.83381e-06
Pnma3	2.75508	2.82247e-07	1.76696e-06
Accs	2.75469	7.13012e-09	5.52001e-08
Sncb	2.75402	1.19168e-05	5.86445e-05
Spag1	2.75286	5.63707e-07	3.39081e-06
Mdh1	2.75273	2.90179e-07	1.81516e-06
Strc	2.75112	6.68415e-08	4.60554e-07
Mmel1	2.75031	1.20865e-05	5.94174e-05
Fez2	2.74895	7.9095e-17	1.39287e-15
Kbtbd11	2.74789	1.14181e-19	2.65033e-18
Tmem240	2.74684	5.46338e-08	3.81392e-07
Ppfia4	2.74683	1.13723e-14	1.65146e-13
Unc5c	2.74615	4.19143e-13	5.26204e-12
Herc2	2.74499	2.0353e-08	1.48985e-07
Spata5l1	2.74409	0.00389355	0.0119206
Lrrc4	2.74377	2.4781e-14	3.49645e-13
AI115009	2.74372	2.9598e-05	0.000136536
A830010M20Rik	2.74327	9.4841e-19	1.99696e-17
Lars2	2.74199	3.20214e-06	1.71853e-05
Ccdc105	2.73966	0.000854419	0.00302205
Zfp786	2.73854	0.00031864	0.00122297
Abl2	2.73825	4.42795e-16	7.31239e-15
Spred1	2.73501	5.0325e-07	3.04361e-06
Impad1	2.73476	0.000183372	0.000733331
Magee2	2.72967	1.60288e-07	1.04667e-06
Zfp286	2.72851	9.63507e-11	9.35892e-10
Pmaip1	2.72691	8.64114e-06	4.3384e-05
5930412G12Rik	2.72623	5.7124e-06	2.95503e-05
A930001C03Rik	2.72474	0.0054592	0.0160713
Klhdc8a	2.72365	4.9909e-11	5.00397e-10
Gucy2e	2.72276	0.00201108	0.00657438
Elk4	2.72206	0.0161734	0.0419814
Camkk2	2.71915	3.07055e-20	7.45328e-19
Vmn1r32	2.71878	0.0342458	0.0811852
Fam13c	2.71509	0.00131575	0.00447416
Zyx	2.71423	2.21287e-07	1.40415e-06
Nyx	2.71411	1.5555e-05	7.50464e-05
Pank1	2.7106	1.72969e-19	3.94433e-18
Scn8a	2.71059	6.18942e-16	1.00787e-14
Tcea3	2.70725	0.000547566	0.0020113
Pcdh9	2.70498	1.36135e-26	5.51892e-25
Cdc42bpa	2.70311	1.31136e-08	9.83664e-08
Rnf128	2.70274	4.8376e-14	6.61762e-13
Sik1	2.70198	3.54482e-11	3.61148e-10
Tmem178	2.70128	1.783e-10	1.67343e-09
Ilvbl	2.70082	2.44773e-15	3.77523e-14
Unc5a	2.70043	9.31028e-13	1.12412e-11
Cables1	2.69971	1.19205e-16	2.06343e-15
Atp9b	2.69747	8.14179e-26	3.08634e-24
Ttpa	2.69571	4.95382e-05	0.000219834
Extl2	2.6955	1.64059e-19	3.74847e-18
A230073K19Rik	2.69483	0.000967856	0.0033838
Ptcd3	2.69444	3.95644e-07	2.42421e-06
Astn2	2.69413	2.90851e-16	4.87906e-15
Dok7	2.69208	0.0221458	0.0553787
Pcsk5	2.69165	1.75992e-12	2.0672e-11
Frmd5	2.69129	0.00139165	0.00470962
Clu	2.69075	1.22907e-05	6.03192e-05
Psd3	2.69061	1.65589e-20	4.10016e-19
Trim41	2.68837	1.11517e-17	2.13445e-16
Elac1	2.68672	2.897e-18	5.86203e-17
4930529M08Rik	2.68463	0.00574116	0.0168103
Prrt1	2.68457	0.0357223	0.0842492
Kif3c	2.68403	5.04971e-08	3.54421e-07
Grb14	2.68368	1.04737e-19	2.43839e-18
Sufu	2.6828	0.0143324	0.0377356
R3hcc1	2.68121	3.03717e-11	3.11604e-10
Rab3il1	2.68114	3.92819e-12	4.43555e-11
L3hypdh	2.68108	5.83674e-07	3.50189e-06
5330434G04Rik	2.68052	0.00199523	0.00653171
Panx2	2.67705	3.23977e-15	4.93168e-14
Mtap1a	2.67596	1.31472e-05	6.42296e-05
1700019G17Rik	2.6754	7.17882e-06	3.64686e-05
Gnai1	2.67537	1.03629e-15	1.65857e-14
BC031361	2.67533	2.04169e-06	1.13055e-05
AI593442	2.6744	5.91331e-15	8.81186e-14
Mapk8ip1	2.67273	3.95998e-06	2.09777e-05
Fignl2	2.67186	1.30779e-09	1.11454e-08
Thyn1	2.67054	0.000598215	0.00218094
Cds1	2.66998	1.00321e-17	1.93123e-16
Prkar2a	2.66834	0.0052447	0.0155024
Zwint	2.66744	0.000653719	0.00236008
Camkk1	2.66709	9.55232e-13	1.15096e-11
Usp25	2.66573	9.33061e-21	2.36311e-19
Dcun1d4	2.6602	1.81362e-06	1.01315e-05
Pde6b	2.65997	0.0221214	0.0553236
Gm10440	2.65855	0.0136376	0.0361056
Clec9a	2.65846	7.41812e-06	3.75994e-05
Trip11	2.65676	0.00397975	0.012159
Vangl2	2.65468	0.00053476	0.00196834
Wdfy2	2.65365	0.0149243	0.0390692
4933425L06Rik	2.65266	0.0060125	0.0174929
Mpc1	2.65232	0.000511024	0.00188962
AI480653	2.65179	5.97089e-06	3.07988e-05
Myh14	2.65011	6.02891e-12	6.68159e-11
Fkbp4	2.64909	3.16119e-06	1.69772e-05
LOC100504608	2.64804	0.0222691	0.0556572
Adnp2	2.64756	5.86809e-08	4.07209e-07
Map3k9	2.64756	3.35579e-10	3.06457e-09
Kctd20	2.64665	0.000227633	0.000896366
Cdk18	2.64605	5.45888e-12	6.0787e-11
Entpd6	2.64428	1.88048e-17	3.52416e-16
6530402F18Rik	2.64394	0.0194575	0.04937
Slc5a8	2.64232	0.00494348	0.0147314
A630089N07Rik	2.63987	0.0100689	0.0276124
Tbcel	2.63727	1.30152e-21	3.5546e-20
Tmem74	2.63668	0.000293961	0.00113534
Rasgrp2	2.63635	2.1878e-10	2.0313e-09
Kri1	2.63606	0.00723552	0.0206271
Nudt15	2.63601	0.000420742	0.00158107
Ak1	2.63359	1.13581e-15	1.81162e-14
Lct	2.63232	1.41763e-06	8.02692e-06
Rgs2	2.63138	3.04312e-15	4.65297e-14
Gria2	2.62975	2.6962e-12	3.10142e-11
Grap2	2.62858	0.0205238	0.0517718
Grid2ip	2.62802	2.277e-09	1.87748e-08
Ascl2	2.62743	0.0129566	0.0345139
Gipr	2.62533	0.0413986	0.0954453
Kif1b	2.62318	3.122e-07	1.94612e-06
Slc25a36	2.62124	0.00458792	0.0137915
Dnajc27	2.62093	1.18668e-17	2.26391e-16
Chd7	2.62087	0.004403	0.0133128
Agap2	2.62047	2.69822e-16	4.54262e-15
Gm5512	2.62034	0.00468094	0.0140495
Arhgap20	2.61997	2.73095e-06	1.48028e-05
Coq9	2.61901	4.26197e-10	3.85592e-09
Spsb1	2.6187	7.97294e-17	1.40298e-15
Tctn1	2.61846	0.0151191	0.0395039
Phf11	2.61736	0.0342805	0.081251
Zfyve28	2.6119	8.10154e-08	5.52348e-07
Ppm1e	2.61148	1.79594e-19	4.08345e-18
Epha6	2.60868	3.15047e-08	2.25873e-07
Faah	2.60763	7.12563e-18	1.39239e-16
Wisp3	2.6068	0.0103691	0.0283159
Ddx24	2.60604	1.27586e-14	1.84474e-13
Derl3	2.60583	0.00117411	0.00403483
Pycr1	2.60532	0.000970264	0.0033912
Dnahc2	2.60449	5.78016e-07	3.46973e-06
Adck3	2.60374	2.65463e-13	3.3818e-12
Atp5b	2.60226	4.85962e-05	0.000216023
Dst	2.60207	0.000387103	0.00146741
Pde4d	2.60182	1.281e-20	3.20606e-19
Gfm1	2.60005	1.75131e-16	2.99816e-15
Greb1l	2.59906	1.93369e-07	1.2398e-06
Ldhal6b	2.59874	0.00251948	0.00806475
Pnkd	2.59647	9.25389e-15	1.35452e-13
Traf3ip1	2.59483	2.76714e-07	1.73511e-06
Slc39a14	2.59449	1.82295e-11	1.91919e-10
Lpin2	2.59359	1.25898e-21	3.45052e-20
1600029D21Rik	2.59313	0.000618065	0.00224541
Dpp8	2.59071	1.79702e-05	8.57249e-05
Zfyve20	2.58895	5.33629e-10	4.76601e-09
AF529169	2.58797	0.0333123	0.0791488
Nova1	2.58676	1.0447e-09	9.00844e-09
Apbb2	2.58096	9.24916e-22	2.55292e-20
Mkx	2.58089	1.40633e-16	2.42177e-15
Bicd1	2.5802	1.78816e-05	8.53417e-05
Rap1gap	2.58008	1.84084e-07	1.1858e-06
Ptpn4	2.5796	0.00103499	0.00360019
Spryd4	2.57912	3.18118e-14	4.42957e-13
2410131K14Rik	2.57884	7.07919e-19	1.51103e-17
Dpf3	2.57771	0.0321599	0.0767716
Fam115c	2.57753	1.31903e-07	8.71309e-07
Hmox2	2.57369	9.37391e-05	0.00039791
Lipk	2.57318	8.02683e-05	0.000343916
Igsf10	2.5716	2.40212e-06	1.31394e-05
Gm16796	2.57031	0.00265656	0.008456
Meis2	2.56908	4.31592e-15	6.49363e-14
Smarca5-ps	2.56898	0.0012354	0.00422804
D630023F18Rik	2.56813	7.19244e-05	0.000310502
Scel	2.5679	8.4485e-07	4.94941e-06
Lrrc49	2.566	2.69821e-05	0.000125111
Gm13157	2.56266	1.52579e-05	7.36892e-05
Endog	2.55835	4.79522e-11	4.81191e-10
Susd1	2.55824	0.000244558	0.000958327
Spag4	2.55745	5.55642e-08	3.87423e-07
Dscam	2.55498	3.5025e-10	3.1923e-09
Alkbh3	2.55491	8.57711e-10	7.48446e-09
Nr2c2	2.55467	0.0372297	0.0872842
Nexn	2.55418	1.1803e-16	2.04461e-15
2310065F04Rik	2.55281	0.000205195	0.000814054
Tab3	2.55267	8.96218e-19	1.89048e-17
Edil3	2.55168	2.42424e-05	0.000113398
Adat1	2.55081	1.33735e-12	1.59247e-11
Acox3	2.55011	1.38896e-19	3.20173e-18
Lrfn5	2.54992	0.0026714	0.00849862
Asf1b	2.54799	1.82432e-07	1.17679e-06
Glt1d1	2.54742	0.0108052	0.0293875
Xlr4b	2.54696	0.0254708	0.0626049
Scn1b	2.54694	3.05579e-05	0.000140326
Phtf2	2.54686	3.0057e-19	6.72281e-18
Klhl17	2.54515	1.6484e-12	1.94796e-11
Ntrk3	2.54497	2.16314e-07	1.37409e-06
Cabyr	2.54326	9.90324e-09	7.53014e-08
Acot12	2.54314	0.0024686	0.00791927
Lrrc26	2.54297	0.00272988	0.00865924
Dnajc21	2.54199	2.8459e-16	4.78435e-15
Gm11944	2.54169	0.000120517	0.000501101
Txlng	2.54115	0.00469104	0.0140761
Ccdc126	2.54024	4.88846e-15	7.31734e-14
Ddx49	2.53883	8.44594e-08	5.72984e-07
Lmbrd2	2.53878	0.00118436	0.00406707
Pdgfa	2.53764	0.000354053	0.00134979
Iffo1	2.53731	2.81814e-10	2.59284e-09
Hdac5	2.53644	7.03157e-06	3.58346e-05
Gm1943	2.53523	0.0283913	0.0688224
Chga	2.53409	6.21539e-05	0.000271434
Rgma	2.53354	1.81486e-09	1.51515e-08
Apex1	2.5318	0.0187333	0.0477765
Apba2	2.53134	1.40451e-15	2.22501e-14
Scyl2	2.53084	0.00139635	0.00472279
Slc24a2	2.53066	4.90618e-05	0.000217927
Dvl3	2.52915	0.00509242	0.0151174
Fam160b2	2.5274	2.31255e-19	5.2124e-18
Fam69b	2.52716	5.11099e-08	3.5849e-07
Atp2b2	2.52657	1.89255e-08	1.3941e-07
Gm14169	2.52629	1.04316e-05	5.1761e-05
Aggf1	2.52558	7.81768e-18	1.52507e-16
Ccdc162	2.52517	0.000551469	0.00202411
Nrg4	2.52338	0.00278339	0.00881611
Gpr125	2.52158	4.26503e-20	1.02146e-18
St3gal5	2.52147	4.70024e-19	1.02671e-17
Agl	2.52142	3.20752e-19	7.13322e-18
Nmrk1	2.52072	4.20053e-11	4.24434e-10
Tbl1x	2.52001	0.0305792	0.0734321
4933400C23	2.51993	0.0244696	0.0604199
Il1rl1	2.51975	0.00168693	0.00561612
Pom121	2.51826	5.9301e-07	3.55243e-06
Lphn1	2.51631	7.38088e-11	7.26606e-10
Fgf18	2.51607	0.0114498	0.0309413
Sh3bgrl2	2.51482	0.000207079	0.00082097
Ccdc96	2.51421	6.89563e-06	3.51901e-05
Golim4	2.51403	5.28839e-12	5.90292e-11
Stxbp6	2.51347	1.25494e-12	1.49893e-11
Ttc17	2.51281	2.08165e-05	9.83182e-05
Dnajb3	2.51187	5.70381e-06	2.95124e-05
Kctd9	2.51043	2.97266e-16	4.97952e-15
C78339	2.5103	0.0225911	0.0562997
Lphn2	2.50774	2.62737e-16	4.42972e-15
Has3	2.50668	2.00879e-07	1.28478e-06
Serpini1	2.50531	2.21674e-13	2.84256e-12
Ccdc176	2.50259	4.47091e-07	2.71876e-06
Diras1	2.50159	6.63279e-05	0.000288153
C2cd2	2.50117	6.08783e-17	1.08351e-15
Gpr141	2.50065	2.31072e-05	0.000108414
Mtmr7	2.50046	3.18827e-09	2.57699e-08
Tmem132e	2.50042	0.00013116	0.00054083
Ddx11	2.49884	6.76758e-05	0.00029379
Foxq1	2.49798	0.000126269	0.000521952
Elac2	2.49664	6.12904e-06	3.15171e-05
Adcy1	2.49624	5.90287e-10	5.24697e-09
Serinc4	2.4956	0.00204247	0.00666485
Abcc8	2.49467	8.77486e-06	4.39892e-05
Ccdc92	2.49299	2.69053e-05	0.00012478
Vwc2	2.49158	1.18195e-08	8.90891e-08
Pkm	2.48976	5.76885e-08	4.01037e-07
Myh13	2.4895	1.52704e-05	7.37345e-05
Fbxo34	2.48928	7.59802e-10	6.65997e-09
BC005537	2.48906	0.00622668	0.0180351
Ccdc63	2.48894	0.000418415	0.00157308
Pdk3	2.4883	1.95715e-15	3.05491e-14
Snap25	2.4869	2.16619e-09	1.79117e-08
Col20a1	2.48677	1.50291e-05	7.26592e-05
Ylpm1	2.48668	2.53231e-14	3.56862e-13
Slc25a2	2.48597	4.12863e-05	0.000185506
Nr1d2	2.48553	4.88062e-17	8.75326e-16
Fsd1	2.48468	1.67216e-09	1.40304e-08
B3galt1	2.48246	1.96097e-10	1.83089e-09
Gm996	2.48094	6.49356e-18	1.27207e-16
Ttf2	2.48082	0.000115141	0.000480289
Egln3	2.47978	1.12416e-11	1.21868e-10
Xpo4	2.4775	0.0165206	0.0427543
Tub	2.47725	9.27143e-11	9.00945e-10
Atp8b2	2.47644	6.11525e-17	1.08756e-15
Atr	2.47066	1.12813e-10	1.08586e-09
Cerk	2.46903	2.35966e-19	5.31344e-18
Fbxo15	2.46893	0.0122696	0.0328963
Btbd9	2.46847	3.53871e-17	6.43053e-16
Dmxl1	2.4635	1.43299e-09	1.21414e-08
Rnmtl1	2.46337	3.86165e-13	4.85587e-12
Gen1	2.46329	0.0126161	0.0336993
Trak1	2.46204	0.000502021	0.00185956
Rasal3	2.46158	0.00313467	0.0097871
Chst2	2.46013	5.35135e-17	9.56077e-16
Cacna2d3	2.45932	6.20856e-19	1.33742e-17
Taf4b	2.45879	1.95699e-11	2.05015e-10
Gpr22	2.45757	5.26483e-11	5.26731e-10
Gm15800	2.45574	1.68109e-08	1.2462e-07
Ccdc22	2.45333	8.2422e-06	4.15329e-05
Zfp146	2.45227	5.30429e-05	0.000234362
Ric3	2.45086	2.48463e-09	2.03788e-08
Psg16	2.45047	0.00300873	0.00943476
Fkbp3	2.44996	2.84159e-06	1.53526e-05
Parm1	2.4491	0.0129632	0.0345244
Kbtbd4	2.44871	0.000795646	0.00282873
Grhpr	2.44815	1.72232e-07	1.11871e-06
Inadl	2.44761	1.52756e-11	1.62358e-10
9430060I03Rik	2.44691	0.0276891	0.0673808
Vps37a	2.44684	3.63329e-13	4.58105e-12
Fndc5	2.44557	3.4103e-17	6.21169e-16
Msl3	2.44445	2.29625e-13	2.93968e-12
Zim1	2.4444	0.0131173	0.0348942
2610507B11Rik	2.44292	1.56351e-11	1.66028e-10
Gas2	2.44254	1.1846e-06	6.80145e-06
Kazald1	2.44211	4.98935e-09	3.92492e-08
Afg3l2	2.44107	4.20073e-09	3.33984e-08
Rab3gap1	2.44045	1.62007e-19	3.70521e-18
Csrnp2	2.43771	1.46783e-16	2.52395e-15
Zyg11b	2.43643	1.09437e-12	1.31251e-11
Zfp691	2.43574	9.13936e-06	4.5689e-05
Ostf1	2.43149	5.36818e-05	0.000236827
Tmem74b	2.43143	5.42287e-08	3.79017e-07
Def8	2.43139	4.44969e-12	5.00504e-11
Pim1	2.43128	3.38377e-07	2.10089e-06
Eno2	2.43081	9.00843e-06	4.50731e-05
Klhl28	2.43027	0.00409072	0.0124508
Rn45s	2.42966	1.14936e-07	7.67152e-07
Cela1	2.42952	1.57627e-09	1.32783e-08
Amh	2.42943	0.00880183	0.0245617
Trpm2	2.42831	1.60889e-12	1.9032e-11
Ssh1	2.42521	0.0166316	0.042994
Sdr42e1	2.42386	1.01486e-08	7.71166e-08
Spn	2.42374	0.0097849	0.0269315
Dach2	2.42291	8.37006e-05	0.000357704
Serpina9	2.42242	0.00748522	0.0212714
Uqcrc2	2.42024	1.296e-11	1.3914e-10
Hdac8	2.41865	8.42809e-13	1.02449e-11
Ttc37	2.41507	7.69236e-06	3.89303e-05
Tbc1d9b	2.41476	0.000233882	0.000918959
Ube2o	2.4145	3.54909e-12	4.03677e-11
Agbl4	2.41238	0.00069876	0.00251143
Glyctk	2.41173	0.000295285	0.00113951
Plekha7	2.41045	0.012176	0.0326769
Yipf2	2.40794	1.09535e-07	7.33934e-07
Mdh2	2.40791	5.22365e-05	0.000231149
Prdx5	2.40783	0.000189014	0.000753864
Cyth1	2.40771	7.21452e-14	9.69869e-13
Prpf40b	2.40759	9.15015e-17	1.60169e-15
Rab6b	2.40561	3.42213e-05	0.000155922
Fbll1	2.40515	2.3643e-09	1.94465e-08
Etfdh	2.4037	0.000677134	0.00243933
Cdr2	2.40362	1.60925e-23	5.11956e-22
Gyg	2.40207	4.8345e-13	6.01441e-12
Nckipsd	2.40141	2.57381e-08	1.86014e-07
Liph	2.40081	0.00188496	0.00620989
Casc1	2.40072	6.98439e-05	0.000302135
Zc3h13	2.40058	1.928e-07	1.23649e-06
Hif1an	2.40031	2.80035e-13	3.5616e-12
Ube2e1	2.40021	0.00182978	0.00604687
Ntng2	2.39863	0.000856182	0.00302736
Nek7	2.3984	0.000601312	0.00219086
St3gal3	2.39811	2.95524e-20	7.18832e-19
Zdbf2	2.39628	1.5588e-06	8.76886e-06
Myo5a	2.39626	1.20013e-13	1.5824e-12
Dhx29	2.39527	0.000176578	0.000708833
Wwp1	2.39483	1.07864e-14	1.57028e-13
Rab3c	2.3943	0.000109775	0.000460206
Gipc2	2.39369	4.04381e-05	0.000182046
A230056P14Rik	2.39334	0.00183647	0.00606554
Scyl1	2.39278	2.65485e-06	1.44238e-05
Usp29	2.39272	3.6458e-05	0.000165275
Cnnm4	2.39257	5.89291e-13	7.27301e-12
Fam199x	2.39165	9.86951e-17	1.71883e-15
C530005A16Rik	2.39053	0.000325847	0.00124858
Pglyrp2	2.38768	0.0194639	0.0493809
Dusp23	2.38747	2.15176e-08	1.57067e-07
Cd79a	2.38642	0.000132269	0.000545209
Prkg2	2.38517	3.26668e-11	3.34123e-10
Brsk2	2.38306	9.20675e-08	6.22428e-07
Zhx3	2.38293	0.00654906	0.0188939
Pcdhb11	2.38254	0.00363618	0.0112061
Habp4	2.38211	0.00018352	0.000733795
Katnal1	2.38179	1.87227e-12	2.19255e-11
Ksr2	2.38109	0.0150424	0.0393298
E130309D14Rik	2.38046	2.56446e-09	2.09746e-08
Bfsp1	2.37797	6.84039e-07	4.05818e-06
Phlda3	2.37785	1.48434e-14	2.13035e-13
Mknk1	2.3771	7.15102e-06	3.63481e-05
Dab1	2.37535	7.34201e-07	4.33814e-06
Fam92b	2.3746	1.80955e-06	1.01112e-05
Vat1l	2.37393	0.000125396	0.000518526
Cryba4	2.3734	0.0102224	0.0279577
Ipo7	2.37291	0.000143955	0.000587364
Hdhd3	2.37167	9.02664e-07	5.26821e-06
Cyb561	2.37026	1.25526e-15	1.99458e-14
Kpna6	2.36973	1.43976e-09	1.21944e-08
Usp13	2.36846	1.83068e-07	1.18024e-06
Mib2	2.36771	6.30125e-12	6.97018e-11
Kbtbd10	2.36746	9.28755e-05	0.000394459
Cdt1	2.3672	0.000143269	0.000584872
Ica1	2.36621	1.20414e-07	8.00625e-07
Ndufaf2	2.36585	2.53065e-09	2.07345e-08
Rfc3	2.36528	5.6477e-09	4.42846e-08
Tfip11	2.36495	7.37158e-07	4.35341e-06
Il28ra	2.36299	0.000620603	0.00225341
Laptm4b	2.36088	4.46363e-11	4.50239e-10
Hmx1	2.35882	3.84733e-11	3.90944e-10
Pcdh10	2.35765	2.03306e-12	2.37252e-11
Rabep2	2.35732	2.28876e-05	0.000107405
Mylk3	2.35728	0.0162496	0.0421605
Foxj1	2.35665	3.87469e-11	3.93382e-10
Sh3gl2	2.35603	4.27941e-12	4.82048e-11
Wdr67	2.35459	0.00564646	0.0165579
2410127L17Rik	2.3541	0.000558172	0.00204646
Camk1d	2.35358	2.01789e-10	1.88102e-09
Cir1	2.35281	0.0226788	0.0565057
Crebl2	2.35011	0.00292554	0.00920554
Rnf17	2.34766	0.00113561	0.00391403
Bambi-ps1	2.34758	0.000249609	0.000976646
Helz	2.347	0.00613909	0.0178146
Stau2	2.34662	0.00207004	0.00674633
Rpgrip1	2.34476	2.96574e-05	0.000136729
Tmem63b	2.34376	4.20982e-06	2.21704e-05
Irgq	2.34291	2.4029e-11	2.49267e-10
Ndufs3	2.34254	1.13763e-10	1.09365e-09
Styk1	2.34138	0.0189452	0.0482274
Ccdc159	2.34038	7.79174e-11	7.65439e-10
Iglon5	2.34029	1.09899e-05	5.43235e-05
Aldh16a1	2.33946	2.33959e-09	1.92569e-08
Zfp599	2.33902	0.000101192	0.000426983
Dqx1	2.33869	0.000150714	0.000612161
Mcam	2.33641	0.00017241	0.000693531
Rnf123	2.3361	0.00735734	0.0209488
Akap6	2.33542	0.000340894	0.00130282
Rab11fip3	2.33539	1.75297e-13	2.27282e-12
Atp5c1	2.33496	0.000242843	0.00095208
Tanc1	2.33443	2.26698e-15	3.5127e-14
Recql5	2.33282	1.2159e-12	1.45379e-11
Tex38	2.33278	3.34668e-05	0.000152723
Rpl26	2.3325	0.0382238	0.089319
Tmem213	2.33179	0.0254725	0.0626049
Dlat	2.3315	3.09937e-12	3.54772e-11
Lce6a	2.33084	0.031383	0.0750998
H2afy3	2.32987	0.0415404	0.0956994
Creg1	2.32924	7.23843e-11	7.13184e-10
Mapk10	2.32768	0.000179493	0.000719297
Tulp4	2.32712	0.000127967	0.00052841
Rnf150	2.32628	3.6562e-10	3.32332e-09
Sall2	2.32626	6.0276e-17	1.07361e-15
Pcyt1a	2.32584	3.35994e-17	6.12953e-16
Crebbp	2.32577	0.0370162	0.0868883
Gan	2.32568	0.0126779	0.0338294
Sulf2	2.32457	7.09876e-07	4.20185e-06
Kctd15	2.32422	2.59647e-09	2.12067e-08
Hook1	2.32348	0.00338613	0.010502
Il2ra	2.3226	0.00505713	0.0150279
Cnr1	2.32155	3.21672e-14	4.47638e-13
Pias4	2.32078	1.52721e-09	1.28883e-08
Adrb3	2.31963	0.0214982	0.0539384
Tnfrsf22	2.3183	1.718e-05	8.22743e-05
Cda	2.31754	2.15952e-08	1.5743e-07
Fam115a	2.31629	0.00378872	0.0116363
Htra2	2.31567	2.63903e-05	0.000122806
Gfm2	2.31523	1.96689e-18	4.03948e-17
Tmem127	2.31499	1.05248e-12	1.26422e-11
5730455P16Rik	2.31436	3.9583e-09	3.16434e-08
A530058N18Rik	2.31425	0.000123806	0.000513133
Zfp367	2.31273	2.69477e-17	4.96649e-16
Lrrc24	2.31253	6.78491e-14	9.17928e-13
Rnf40	2.31209	1.86537e-16	3.18408e-15
Fgf22	2.31074	0.0236362	0.0585911
Map3k15	2.30994	0.0371924	0.0872231
Mapk8ip2	2.30834	0.000298779	0.00115243
Chd6	2.30724	3.65714e-13	4.60863e-12
Plcl2	2.30723	8.13754e-13	9.9227e-12
Srrm4	2.30692	6.90611e-07	4.09301e-06
Clasp1	2.30662	9.17633e-18	1.77381e-16
Icam5	2.30633	0.00419311	0.0127342
E230025N22Rik	2.30588	0.00169224	0.00563097
Pitpnm1	2.30538	4.42116e-15	6.63486e-14
Nudt5	2.30533	4.21647e-09	3.35008e-08
Lpin1	2.30414	1.98885e-11	2.07978e-10
Cbfa2t2	2.30413	5.87236e-09	4.59228e-08
Wee1	2.30297	6.10744e-09	4.76654e-08
Hip1r	2.30265	2.59185e-15	3.9896e-14
Zfp955b	2.30182	0.0214491	0.0538382
2310008H09Rik	2.30126	5.29249e-14	7.20612e-13
Ankrd9	2.30112	4.58968e-13	5.72815e-12
Accn4	2.29958	0.0108511	0.0295012
Zfp180	2.29924	0.000379228	0.00143896
Gtpbp3	2.29768	2.30863e-09	1.90289e-08
Egf	2.29757	0.00758751	0.0215228
Pcnxl3	2.29756	2.16625e-06	1.1933e-05
Xkr8	2.29697	4.6447e-06	2.43071e-05
Plcl1	2.29663	1.70462e-11	1.80274e-10
Ltbp3	2.29547	2.5511e-12	2.94176e-11
Fuk	2.294	0.00150328	0.00505663
Slitrk1	2.29236	3.21607e-12	3.6759e-11
Akr1b10	2.29125	2.6819e-05	0.000124435
Tecpr2	2.29013	2.90021e-09	2.35558e-08
Gm15455	2.29	0.000939963	0.00329516
Atp1a3	2.28982	6.34808e-05	0.000276659
Prkaca	2.28916	2.13101e-13	2.73714e-12
Ddx4	2.289	0.000728373	0.00260742
Uvrag	2.28858	1.21325e-07	8.05764e-07
Dach1	2.28784	1.78221e-07	1.15121e-06
Lpgat1	2.28681	2.93353e-13	3.72896e-12
Gnaz	2.28523	0.0110831	0.0300618
Rnft2	2.28503	1.88247e-11	1.97829e-10
Ado	2.28435	5.39723e-22	1.52211e-20
Ipw	2.28328	0.00516527	0.0153103
Draxin	2.28297	0.000246197	0.000964103
Pick1	2.28293	2.68642e-11	2.77446e-10
Nlrp4f	2.2807	0.00222528	0.007202
2610301G19Rik	2.28011	1.4407e-17	2.72624e-16
Xkr6	2.27979	0.00720649	0.0205544
Ckb	2.27934	0.000107522	0.000451166
Stx17	2.27877	7.93979e-10	6.9491e-09
Cdh26	2.27826	0.000211002	0.000835527
Kcnh1	2.27601	3.55999e-07	2.19772e-06
Vipas39	2.27537	4.78347e-05	0.000212922
Zfp493	2.27494	2.48239e-06	1.35467e-05
Col19a1	2.27429	6.27562e-05	0.000273757
E530011L22Rik	2.27337	1.96015e-06	1.08902e-05
Slc2a13	2.27325	8.02693e-08	5.47581e-07
Rimkla	2.27307	1.66086e-06	9.32053e-06
Inpp4b	2.27261	0.038234	0.0893338
Tacc1	2.27202	2.82851e-07	1.77026e-06
Pacs1	2.27107	1.53297e-07	1.00354e-06
Zfp385b	2.26865	1.29206e-09	1.10234e-08
Sort1	2.26822	1.47799e-10	1.40352e-09
Prrt3	2.26815	6.09773e-11	6.0462e-10
Idh3b	2.26793	0.00125656	0.00429351
Heatr5b	2.26764	0.000399167	0.001508
Mtap2	2.26747	4.67305e-10	4.20989e-09
Tbc1d4	2.26508	3.02527e-16	5.06403e-15
Rnf180	2.2636	0.0399895	0.0927763
Slc25a12	2.26183	8.67891e-10	7.55917e-09
Tmod1	2.26173	0.00529358	0.015631
Aff1	2.26135	9.72642e-12	1.05884e-10
B230319C09Rik	2.26093	1.62682e-05	7.82287e-05
4833419F23Rik	2.26018	0.00182108	0.00602153
Mtap7d1	2.25957	1.79399e-12	2.1051e-11
Rhof	2.25899	7.64008e-09	5.90154e-08
Kremen2	2.25699	6.05678e-06	3.11936e-05
Tmem37	2.25682	0.000438064	0.00164167
Tmie	2.25671	0.012471	0.0333573
Dph1	2.25646	0.0217163	0.0544505
Dpp9	2.25625	0.000910741	0.00320041
Rabgef1	2.25605	7.18167e-14	9.66566e-13
Sephs2	2.25501	4.52916e-10	4.08184e-09
Aco2	2.25442	6.71603e-11	6.63955e-10
Lipa	2.25439	3.45034e-07	2.13598e-06
Kif27	2.25346	0.000160252	0.000648199
Pde4dip	2.25273	2.75609e-11	2.84139e-10
Rasgef1b	2.25229	7.15687e-06	3.637e-05
Cdc37l1	2.25077	7.19215e-19	1.53234e-17
Gm10033	2.24892	1.51545e-06	8.54146e-06
Scrn2	2.24884	1.1995e-05	5.89843e-05
Dync2h1	2.24867	4.93535e-06	2.57474e-05
Fem1c	2.24736	0.0185188	0.0473017
Olfm3	2.2468	2.02866e-07	1.29606e-06
Smarca4	2.24602	1.68472e-12	1.98787e-11
Itsn1	2.24567	7.90291e-16	1.27491e-14
Tnrc6b	2.24548	8.36032e-06	4.21009e-05
Fbxo44	2.24514	1.90764e-05	9.06497e-05
Vsp9d1	2.24344	2.48856e-07	1.56809e-06
Uba6	2.2407	0.00498353	0.0148337
Tmem144	2.2405	0.0101145	0.0277112
Mrgprb1	2.24044	0.0227846	0.056733
1700066J24Rik	2.23958	4.34549e-05	0.000194501
Zgpat	2.2382	4.33702e-06	2.27837e-05
Mtmr3	2.23761	6.64233e-14	9.00727e-13
Phlpp2	2.23735	9.97007e-10	8.61944e-09
Etv6	2.23699	6.38914e-07	3.80885e-06
Srfbp1	2.23593	0.00550517	0.0161862
Mthfd2	2.23543	6.29646e-10	5.58195e-09
Msh5	2.23513	4.46871e-11	4.50556e-10
Rabl6	2.23308	5.11611e-10	4.5878e-09
Rptor	2.23274	2.97757e-08	2.13936e-07
Mppe1	2.23198	0.000616142	0.00223896
Uqcrfs1	2.23175	8.30674e-11	8.11593e-10
Cstad	2.23081	3.38948e-06	1.81282e-05
Selrc1	2.23066	0.000179219	0.000718446
Slc25a5	2.23051	0.00214034	0.00695511
Ankrd24	2.23031	1.72338e-05	8.24642e-05
Sod2	2.22674	2.66215e-11	2.75062e-10
Limk1	2.22591	0.000817787	0.00290171
Galr2	2.22487	0.0389695	0.0906893
Pgbd5	2.22449	2.80309e-07	1.7553e-06
Rnf169	2.22369	5.12718e-10	4.59596e-09
Alad	2.22355	5.54448e-08	3.86706e-07
Zfp498	2.22307	0.0399834	0.0927714
Ikzf4	2.22274	0.0414556	0.0955324
Slc4a8	2.2223	6.87913e-12	7.58426e-11
Ivd	2.22101	2.38447e-14	3.37249e-13
Ccdc91	2.21981	1.17238e-11	1.26742e-10
Asphd1	2.21808	4.12247e-07	2.52197e-06
Prr5l	2.21808	0.000904053	0.0031806
Nhlrc3	2.21793	0.0333609	0.0792483
Nkiras1	2.21642	3.36983e-10	3.07618e-09
Nrbf2	2.21473	1.05139e-08	7.98151e-08
4933412E12Rik	2.21239	0.000191272	0.000762442
Rad54l2	2.21194	7.92855e-11	7.77571e-10
Ndufa9	2.21051	2.5331e-10	2.33981e-09
Dis3l	2.21011	8.80888e-14	1.17675e-12
0610040F04Rik	2.21	0.00245642	0.00788234
Prmt3	2.20992	9.8537e-18	1.90003e-16
A030009H04Rik	2.20869	9.90927e-07	5.74743e-06
Ndufaf5	2.20849	1.4871e-15	2.35107e-14
Eif2c2	2.20756	0.0372015	0.0872268
Dnm1	2.20754	0.000956704	0.00334832
Rnf19a	2.20642	4.1188e-18	8.25563e-17
Acsf3	2.20544	5.21701e-10	4.66574e-09
Fam168a	2.20446	2.01632e-10	1.88032e-09
Efcab9	2.20386	0.000977866	0.00341624
Dlgap3	2.20377	0.009918	0.0272497
Nhsl1	2.20338	0.001409	0.0047628
Il17re	2.20314	0.000283262	0.00109856
Pcyt1b	2.20231	1.9467e-11	2.04119e-10
Wbscr27	2.20211	1.31823e-05	6.43704e-05
Cdc37	2.20131	0.00135139	0.00458551
D17H6S53E	2.20079	1.22265e-06	7.00446e-06
Nans	2.20057	2.98792e-12	3.42518e-11
Pgm2	2.19955	6.44876e-12	7.11986e-11
4930590J08Rik	2.1976	0.0377683	0.0884037
Madd	2.19745	9.10212e-11	8.85598e-10
Macrod1	2.19645	3.73662e-12	4.23562e-11
Pik3r3	2.19642	8.41937e-12	9.22575e-11
Reep5	2.19589	8.33605e-10	7.28227e-09
Prmt7	2.19579	6.96467e-11	6.8708e-10
Kbtbd5	2.1957	8.35392e-05	0.000357145
Amot	2.19422	2.15992e-05	0.000101747
Trim3	2.19419	3.10159e-12	3.54851e-11
Arsg	2.194	0.000424667	0.0015953
Rap1gap2	2.1936	1.95339e-10	1.82454e-09
Hebp2	2.19293	1.3138e-15	2.08414e-14
Cd160	2.19191	0.000311511	0.00119738
1700008O03Rik	2.19023	0.00227775	0.00735757
Kctd7	2.18865	1.86498e-18	3.84031e-17
Msh6	2.18848	5.55922e-11	5.54521e-10
Rapgef1	2.18847	3.06021e-13	3.88575e-12
Fitm2	2.18844	0.000241692	0.000948051
Fam168b	2.18834	0.000540669	0.00198937
Gabrb2	2.18826	4.21214e-09	3.34778e-08
Atg4d	2.18785	4.35897e-09	3.45155e-08
Trpc5	2.18708	0.0396139	0.0919965
B930041F14Rik	2.1869	1.56815e-12	1.85783e-11
Ddx27	2.18668	1.24185e-05	6.09212e-05
Ccdc41	2.18639	1.78786e-07	1.15446e-06
Maneal	2.18446	5.82798e-10	5.18435e-09
Pin1	2.1835	1.02855e-10	9.95761e-10
Pip5k1b	2.18315	2.63971e-07	1.65966e-06
Piwil1	2.1831	0.0118022	0.0318275
Sdha	2.18096	4.89654e-12	5.48389e-11
Ptpn11	2.17843	3.17996e-10	2.91197e-09
Spnb3	2.17831	1.37124e-07	9.03492e-07
Gpr3	2.17763	3.80791e-05	0.00017189
Tbx21	2.1755	0.0113569	0.0307151
Prmt10	2.17496	2.75107e-09	2.23756e-08
Pstpip1	2.17488	2.0666e-06	1.14299e-05
Ccdc15	2.17396	0.00147875	0.00498156
[truncated: 301 more rows]

## Sheet: Culture Runx3-RiboTag Enriched
Gene	IP vs Input Fold Enrichment	IP vs Input p-value	IP vs Input FDR
Abra	438.456	2.92114e-06	0.000246282
Sstr3	364.578	1.37295e-05	0.000857071
4933427E11Rik	153.316	0.000366133	0.0114769
8430431K14Rik	122.622	0.00334137	0.0594157
Atp6v0d2	99.1458	0.0030963	0.0562884
Crocc	94.5148	0.00292501	0.0539747
Cd28	84.8537	0.0031924	0.0574633
Ccdc108	79.1245	0.00441832	0.0727162
Col9a2	72.0321	0.00361616	0.0626816
Sytl4	69.8678	0.000478477	0.0142378
Tcf15	68.1799	0.0019011	0.040419
Gpr183	67.2385	0.00640415	0.0914328
Cyp24a1	61.0527	0.00583164	0.0862231
Prtg	59.5923	0.00271394	0.0513061
Trim75	47.9178	0.0035508	0.061865
6430411K18Rik	43.825	0.00582212	0.0862231
Dcc	38.9135	0.000154548	0.00584334
Lce1c	33.2046	6.39547e-05	0.00304616
Cldn9	31.3848	0.00296238	0.0544588
Ldhal6b	28.4854	0.000169318	0.00627247
Chad	28.3763	2.95622e-05	0.00160235
Mmp9	24.8452	0.00285166	0.053156
Olfm4	23.4754	0.00373465	0.064004
A230077H06Rik	22.3295	0.00169362	0.0369175
LOC100862268	21.9102	0.00225313	0.045155
9630001P10Rik	18.7093	0.00282359	0.0529017
Pak6	17.8102	0.00573093	0.0853531
Gm7694	16.9315	0.000458294	0.013777
Tex15	16.8438	0.0010739	0.0270225
Srpx2	16.2153	7.23025e-06	0.000502691
Cdh12	15.7857	2.5555e-17	5.58032e-14
Clspn	15.4519	0.00628328	0.0904571
Rtl1	14.3511	0.00622091	0.0899121
Cdh7	12.9994	0.00492234	0.0771482
Pcdh8	12.8802	3.41445e-06	0.00027522
Adra1d	12.3177	0.00452534	0.073763
Wdr72	12.2379	0.0036303	0.0626816
Bpifb1	11.8061	0.00519541	0.0798917
Ankrd1	11.465	0.00491646	0.0771385
Kif21b	11.423	5.46567e-13	3.81816e-10
Runx3	11.3701	2.95127e-07	3.60792e-05
Lancl3	11.1324	5.52521e-27	4.05274e-23
Cdkl4	11.0727	0.00163553	0.0361011
Nkain3	10.2287	0.00513604	0.0791446
Cap2	10.1039	7.23793e-05	0.00329753
Whrn	10.091	1.79554e-06	0.000167774
Xirp2	9.96295	6.43435e-05	0.00305475
Pappa2	9.41577	3.87207e-06	0.000298964
Rcsd1	9.38585	0.000134974	0.00522367
Slit3	9.35243	0.000664914	0.0185487
Tmem132d	9.24337	0.00146911	0.0332078
Htr1f	8.99511	1.36603e-05	0.000857071
Kprp	8.96247	0.000280005	0.0092724
Mrvi1	8.63471	0.00137681	0.0317076
Lrrc7	8.57066	1.93862e-05	0.00113305
Wnt7a	8.53436	0.00110527	0.0275284
Sfmbt2	8.47475	0.006642	0.0934931
Lce1g	8.46834	1.99554e-10	6.97014e-08
Nxph1	8.44018	2.393e-07	3.02007e-05
Adcyap1r1	8.13544	0.00532071	0.0813071
Unc80	8.03101	1.79453e-32	2.63258e-28
Ano1	7.93667	8.40203e-12	4.25027e-09
Pvalb	7.86822	3.10845e-07	3.76868e-05
Mdga1	7.69569	0.000115836	0.00468083
Cdo1	7.68232	0.00105678	0.0267754
Ankrd34c	7.53607	0.000231881	0.00800398
Gm5105	7.43429	0.00293003	0.0539994
Ndst4	7.40826	6.44696e-18	2.08904e-14
D430041D05Rik	7.39492	1.62912e-06	0.000157232
Lmcd1	7.3568	0.00200572	0.0417628
Slc2a13	7.15082	1.1209e-06	0.000114192
Ttn	7.06919	1.8981e-07	2.48617e-05
4921511I17Rik	7.05268	0.00687314	0.0956632
Adat1	7.01043	0.00649989	0.0923967
Pcsk6	6.75345	0.00458729	0.0739853
Onecut1	6.74656	0.00013531	0.00522367
Frmpd4	6.68299	7.12013e-18	2.08904e-14
St8sia5	6.66316	0.00634764	0.0909374
Slit2	6.61067	1.07135e-08	2.24524e-06
Etv1	6.40602	4.40058e-15	6.45564e-12
Spp1	6.35462	7.39356e-15	9.03863e-12
Cacng5	6.34488	8.61334e-05	0.00378385
Slitrk1	6.33546	7.52165e-09	1.7241e-06
Fhod3	6.31258	2.65549e-05	0.00146452
Myo5b	6.23697	0.00218634	0.0444554
Pthlh	6.16881	0.00509178	0.0787107
Esrrg	5.91898	1.88696e-07	2.48617e-05
Eya2	5.84063	0.00146378	0.0331386
Sphkap	5.78362	9.93021e-10	2.8564e-07
Rapgef5	5.71347	2.95852e-09	7.89118e-07
Neb	5.65816	2.24386e-05	0.00127587
Pappa	5.62462	5.8749e-14	6.15605e-11
Raver2	5.61346	0.00263477	0.0501976
Rasgrf1	5.54145	6.13317e-09	1.42815e-06
Mgat4c	5.43322	0.00123759	0.0293778
Pth1r	5.3957	0.0027675	0.0520504
Cyp2s1	5.38779	0.00710302	0.0978417
Sptb	5.33687	1.93774e-10	6.93335e-08
Lhfpl1	5.12967	0.000778607	0.0211914
Galm	5.1243	0.0017905	0.0385344
B3galt5	5.12264	0.00465672	0.0746496
Cep350	5.08701	0.00571372	0.0852699
Clmn	5.01565	0.000148022	0.00562559
Clstn3	5.00093	7.1591e-05	0.00329157
Aldoc	4.98805	3.28706e-11	1.37775e-08
Cux2	4.90732	0.000866893	0.0230386
Plekhg1	4.81522	4.52098e-07	5.10175e-05
Sort1	4.79977	3.86265e-10	1.25569e-07
Bend7	4.76779	0.00226755	0.045197
Lphn2	4.64809	3.20819e-09	8.40431e-07
Kndc1	4.63957	1.86451e-05	0.00109874
Enc1	4.61004	1.03597e-05	0.000703595
C1ql3	4.58611	0.00163847	0.0361011
Gm13749	4.56664	0.00178108	0.0384241
Ryr2	4.53841	0.00140121	0.0320683
Gm16551	4.53296	0.00541788	0.0822375
Atp8a2	4.49137	2.66273e-17	5.58032e-14
Etl4	4.47754	3.30843e-05	0.00175024
Ogdhl	4.4629	0.00360564	0.0626816
Gprc5b	4.43352	0.00512247	0.0790185
Pls1	4.42589	5.72271e-06	0.000407535
Smad9	4.37787	3.93739e-10	1.25569e-07
Unc5c	4.34376	2.60174e-07	3.20736e-05
Lingo4	4.30818	0.00172305	0.0375032
Magee1	4.30514	2.15226e-12	1.21437e-09
Prss12	4.30193	0.00119504	0.0289294
Rgs2	4.27345	0.00208914	0.0431343
Gm15350	4.25561	0.000847064	0.0226347
Ppargc1a	4.24495	1.48304e-11	7.01811e-09
Mme	4.22183	0.000344704	0.0108748
Slfn9	4.21901	0.000647234	0.0182244
Dnah10	4.20951	1.27277e-05	0.000822145
Olfm2	4.18581	0.00526244	0.0805005
Iqck	4.16152	0.00212264	0.0435511
Tenm1	4.15721	0.000130646	0.00507031
Ntrk3	4.13837	1.71424e-16	2.79421e-13
Gucy1a2	4.09103	5.37983e-11	2.19228e-08
Zfp804a	4.084	1.84587e-12	1.08315e-09
Stxbp5l	4.079	6.54787e-14	6.40382e-11
Cdh8	4.05849	0.00177015	0.0383011
D630039A03Rik	4.01005	9.56271e-05	0.00403118
Edil3	3.9727	6.23286e-17	1.14295e-13
Flrt2	3.93151	0.00617648	0.0895855
Ppp1r9a	3.92259	2.7091e-10	9.24245e-08
Hs3st2	3.90464	1.2353e-06	0.000124978
Clu	3.90439	2.47851e-18	1.21199e-14
Wnk3	3.86276	0.000177647	0.0064828
Tmem132b	3.83291	2.83272e-06	0.000243018
Ahdc1	3.82757	0.00279239	0.0524511
Myh10	3.80333	4.70042e-13	3.44776e-10
Clstn2	3.80331	1.09031e-13	9.40877e-11
Gabrg1	3.78548	0.000100373	0.00418318
Nsg1	3.77846	0.000650049	0.0182686
Iqsec1	3.74407	1.38419e-14	1.56201e-11
Jag2	3.73998	0.00164954	0.0362456
Serpini1	3.73592	1.71068e-12	1.04565e-09
Sorcs1	3.72614	0.0046318	0.0743419
Eprs	3.71422	0.00329767	0.0589242
Csmd2	3.69627	0.00181663	0.0387918
Heatr5a	3.6853	4.93848e-07	5.44718e-05
Epn3	3.67403	2.41295e-06	0.000210703
Fam19a2	3.63939	0.000106672	0.00437117
Slc24a2	3.62815	2.47259e-11	1.06685e-08
Lcp1	3.61762	2.19679e-08	4.18532e-06
Ina	3.59226	5.88271e-08	9.90515e-06
Hapln4	3.58332	9.54828e-09	2.06599e-06
Relt	3.56262	0.00710283	0.0978417
Dnm3	3.56234	2.33499e-13	1.80285e-10
Sh3bgr	3.50687	0.0022846	0.0454739
Lmo7	3.49145	3.92766e-06	0.000301669
Tenm2	3.48272	6.37637e-05	0.00304616
Thrsp	3.4821	0.00706116	0.0976411
Crim1	3.46552	0.000471602	0.0141192
Atp1a3	3.45338	7.08138e-13	4.51669e-10
Tnik	3.43741	1.01663e-06	0.000105028
Limch1	3.42589	0.000129472	0.00504934
Kcnc3	3.37483	3.64411e-07	4.31122e-05
Grik2	3.36695	0.00634322	0.0909374
Ankrd26	3.35936	0.00446547	0.0732757
Sulf2	3.34178	1.08911e-06	0.000111728
Epha6	3.34043	0.00036029	0.0113179
Tanc1	3.33021	6.37427e-10	1.90838e-07
Vav3	3.32316	0.000183455	0.00661249
Enah	3.30951	2.39029e-11	1.06259e-08
Abcd2	3.28943	0.00288966	0.0535243
Synj1	3.28682	8.6652e-14	7.94491e-11
Plcd4	3.24716	0.00110299	0.0275284
Cbln2	3.24533	0.00221856	0.0448913
Rasgrf2	3.2351	6.77764e-05	0.00317661
Plekhd1	3.2314	0.00059482	0.017066
Hipk2	3.23048	9.57649e-09	2.06599e-06
Dock10	3.22361	0.000612688	0.0173852
Prr12	3.21042	0.00287707	0.0534261
Sacs	3.20348	0.000126356	0.00496956
Hivep2	3.20155	4.044e-07	4.6713e-05
Map1b	3.17538	1.17347e-05	0.000775444
Nfasc	3.17139	1.86977e-13	1.52386e-10
Atp2b2	3.16905	7.80276e-12	4.15103e-09
Faim2	3.16574	1.91226e-11	8.76653e-09
Ikzf2	3.16405	0.0069929	0.096962
Sparcl1	3.14196	6.83881e-08	1.105e-05
Asic1	3.10227	3.07504e-05	0.00165241
Zak	3.08391	2.17064e-06	0.00019408
Arhgap24	3.08033	0.00583637	0.0862231
Aatk	3.06904	0.000190131	0.00680297
Car2	3.06882	1.31454e-10	4.94471e-08
Amph	3.05325	1.99418e-08	3.84929e-06
Kcnh2	3.05027	4.34097e-08	7.76611e-06
Hspb6	3.04015	0.00446122	0.0732757
Itga6	3.03308	6.1199e-05	0.00295849
Birc6	2.99873	4.56198e-07	5.10873e-05
Tenm4	2.98792	5.72203e-05	0.00279807
Nyap2	2.98506	0.000112943	0.00460243
Kirrel3	2.96675	0.0065522	0.0927807
Map2	2.96435	3.31676e-05	0.00175024
Dmxl1	2.96122	1.21147e-07	1.72546e-05
Celsr2	2.95646	2.40864e-07	3.02007e-05
Kcnk1	2.95586	0.00363385	0.0626816
Atp11a	2.9527	2.84338e-10	9.4801e-08
Camk4	2.95086	0.00104965	0.0266407
Slitrk3	2.94881	1.08858e-05	0.000733364
Slco5a1	2.9367	1.45219e-06	0.000143315
Sptan1	2.93553	4.70572e-05	0.00238868
Clmp	2.92698	0.00145815	0.0331132
Lrp1b	2.91401	0.00502539	0.0780958
Lgi3	2.91075	1.34995e-05	0.00085361
Myo18a	2.90485	4.10407e-09	1.03146e-06
Mcam	2.9039	9.87253e-11	3.81132e-08
Lrrfip1	2.89135	4.23006e-09	1.03425e-06
Inppl1	2.88469	0.0071768	0.098488
Ralgapa2	2.87665	1.27777e-05	0.000822145
Myh14	2.87561	0.00220791	0.0447376
Ppip5k1	2.86078	1.38267e-08	2.76149e-06
Dmxl2	2.85321	3.05787e-06	0.000256337
Arap2	2.85309	3.15104e-05	0.0016848
Sdk2	2.84596	0.000121326	0.00483658
Smc1a	2.83996	0.00490049	0.0769703
Gpr64	2.83209	0.00258876	0.0497083
D630045J12Rik	2.82199	2.15212e-07	2.79394e-05
Dhx38	2.8099	0.00302761	0.0554495
Arhgap36	2.80679	0.00153969	0.0344318
Pak1	2.80266	6.27205e-11	2.48678e-08
Sv2b	2.80124	2.11209e-06	0.000190088
Macf1	2.79965	6.15092e-05	0.00295849
Pdk3	2.79602	0.000165357	0.00617248
Astn2	2.78028	0.000290179	0.00954469
Msh6	2.77644	0.000249004	0.00839744
Tanc2	2.77492	0.00152972	0.0343134
Trim9	2.76573	2.87953e-06	0.000244178
Scn8a	2.76556	1.34323e-06	0.000134048
Kcns1	2.75899	0.00607678	0.0884388
Nf1	2.74907	1.63566e-07	2.23244e-05
Jak1	2.72499	1.67375e-07	2.25265e-05
Tmem47	2.72492	8.3788e-05	0.00370232
Tmem229b	2.71979	1.34519e-05	0.00085361
Usp28	2.71742	0.00461198	0.0741861
Prrc2c	2.70786	2.29554e-06	0.000202865
Osbpl6	2.70577	7.0408e-05	0.00325919
Vsnl1	2.70383	3.78803e-05	0.00196362
Gm15800	2.70245	7.99083e-08	1.2211e-05
Ache	2.69608	0.00225039	0.045155
Setbp1	2.68755	0.00701119	0.0971238
Dysf	2.67454	0.000473648	0.0141228
Asah2	2.66884	0.000233562	0.0080431
Plcb4	2.6624	2.21128e-05	0.00126224
Pcdh7	2.6614	1.7676e-06	0.000166287
Fgf1	2.6592	1.29603e-08	2.64067e-06
Synm	2.65831	4.74859e-08	8.2638e-06
Ppm1e	2.6526	1.09734e-09	3.09576e-07
Gfra1	2.64684	3.87035e-06	0.000298964
Mtus2	2.64545	9.40174e-05	0.00399778
Kank4	2.6374	0.00318932	0.0574633
Myo5a	2.63625	2.58254e-06	0.000222858
Epb4.1l1	2.6333	1.90396e-09	5.17243e-07
Fat3	2.62919	1.39298e-08	2.76149e-06
Lrrn1	2.62825	4.14832e-09	1.03146e-06
Oxr1	2.61925	1.76829e-06	0.000166287
Pacs1	2.61659	5.29925e-06	0.000384851
Scn1a	2.60974	9.89433e-08	1.4537e-05
Ckb	2.60718	1.22204e-11	5.97578e-09
Ncoa3	2.59657	0.00209112	0.0431343
A830010M20Rik	2.59145	2.29825e-07	2.95748e-05
Slc17a7	2.57784	4.70307e-06	0.000350224
Map1a	2.57289	1.47495e-07	2.04127e-05
Pclo	2.57201	1.12921e-05	0.000752979
Vps13c	2.56896	0.000140157	0.00538247
Mctp2	2.56798	0.00204944	0.0424651
Tln2	2.56155	4.61913e-06	0.000345728
Sema7a	2.55707	0.0041594	0.0696556
Vamp1	2.55704	4.19084e-07	4.8031e-05
Arhgef10l	2.549	0.00364132	0.0626816
Nefh	2.54166	7.04293e-08	1.12304e-05
Dlg2	2.53322	1.64351e-07	2.23244e-05
Prepl	2.52932	8.45882e-09	1.88016e-06
Stx18	2.52805	0.00254395	0.049113
Syt2	2.52144	0.00124337	0.0294197
Ptpn4	2.52058	0.000301426	0.00980471
Mest	2.51648	6.74026e-06	0.000470855
Acox3	2.51465	0.000206471	0.00729863
Ccdc88a	2.50787	7.17998e-05	0.00329157
Tnrc6b	2.49289	9.26357e-06	0.000635031
Rab3c	2.48737	8.9462e-05	0.00390081
Slc16a6	2.48331	0.00112814	0.0278149
Phactr2	2.48092	1.86493e-05	0.00109874
Chgb	2.47732	5.15053e-08	8.78585e-06
Endod1	2.4733	9.75323e-09	2.07362e-06
Mkl1	2.46988	0.000330062	0.0105033
Pde4d	2.46281	0.000314249	0.0101097
Onecut2	2.45814	0.000517182	0.0151438
Kbtbd11	2.45583	0.000512192	0.0151129
Arid5b	2.45237	9.91637e-05	0.00415578
Fam160b1	2.44721	0.000216775	0.00755548
Pygb	2.44102	1.97346e-08	3.84929e-06
Tns1	2.43998	2.07551e-06	0.000187949
Nefm	2.43228	5.25297e-06	0.000383389
Aff1	2.42969	7.45854e-07	7.87171e-05
Dip2a	2.42943	0.00575774	0.0855786
Hspa12a	2.42437	3.92376e-09	1.00985e-06
Slc3a1	2.42335	1.32268e-07	1.86575e-05
Acsl6	2.42179	4.3275e-07	4.92128e-05
Plxna2	2.42073	9.53546e-05	0.00403118
Opcml	2.41693	0.000777952	0.0211914
Dock3	2.41527	7.79744e-06	0.000537035
Adcy1	2.41391	0.000123522	0.0048975
Snap91	2.41313	1.07859e-07	1.56663e-05
Pbx1	2.41259	1.23878e-05	0.000808226
Atp2b3	2.4111	4.3082e-06	0.000329174
Kcnh1	2.40939	4.36961e-05	0.00224134
Cxxc5	2.40663	0.00200681	0.0417628
Eno2	2.40315	8.36728e-09	1.88016e-06
Clrn1	2.40049	0.00496261	0.0775207
Slc4a8	2.3944	5.42966e-06	0.00039238
Tnks	2.39144	0.000243556	0.00823265
Kcnh7	2.38934	0.000172902	0.00635936
Kcna2	2.38798	5.07538e-06	0.000372279
Ypel2	2.38694	0.00568272	0.0849801
Kcna1	2.38688	4.58762e-06	0.00034513
Mycbp2	2.38605	1.89983e-05	0.00111482
Dst	2.385	0.000303979	0.0098441
Ldhb	2.38451	0.000135708	0.0052253
Scrt1	2.37494	0.00241447	0.0473534
Peg3	2.37189	3.85893e-06	0.000298964
Kcnc1	2.37066	3.16359e-06	0.00026073
Ablim2	2.36815	0.00383584	0.0652817
A230070E04Rik	2.35742	2.3354e-07	2.97916e-05
6430548M08Rik	2.34896	7.72495e-06	0.000534552
Kif1b	2.34499	2.37012e-05	0.00133217
Aak1	2.34348	2.74781e-08	5.10257e-06
Chd6	2.33928	1.15712e-05	0.000768101
Dync1h1	2.33616	0.0012185	0.0291704
Pnkd	2.33552	1.60763e-05	0.00097493
Tmem178b	2.33531	1.2012e-05	0.000790206
Wdfy3	2.33525	9.43238e-05	0.00399922
Apc	2.33267	1.60827e-05	0.00097493
Epb4.1	2.32825	0.000748419	0.0204838
Lrrk2	2.3268	0.001193	0.0289277
Ccrn4l	2.32595	0.00435356	0.0720031
Ttc28	2.3245	0.00313995	0.0567979
Cygb	2.31283	0.00179144	0.0385344
Mapkbp1	2.31282	0.0010058	0.0259773
Depdc5	2.31179	0.000409643	0.0126315
Cep290	2.31098	0.00333752	0.0594157
Agl	2.31034	0.000141375	0.00541506
Rcbtb1	2.3075	6.10794e-09	1.42815e-06
Plekha6	2.30005	7.72594e-08	1.19305e-05
Dnm1	2.2959	6.57878e-08	1.08439e-05
Fbxo31	2.29001	1.0898e-05	0.000733364
Mdh1	2.28662	2.01494e-06	0.000184745
Mtx3	2.28185	0.00602772	0.0880744
Dennd5b	2.27524	0.00280342	0.052591
Apbb2	2.27186	8.29387e-05	0.00369821
Got1	2.26771	3.95574e-07	4.64245e-05
Ank2	2.26136	0.000530493	0.0155026
Plxna1	2.24731	1.24512e-05	0.000808226
Syne1	2.24728	0.000237009	0.00808587
Akap6	2.24634	0.000450349	0.0135939
Golim4	2.24109	7.51025e-05	0.00339001
Snap25	2.23941	0.000196503	0.00699685
Kcnb2	2.23633	0.000124037	0.00490466
Med12l	2.23517	0.000212132	0.00746278
Plec	2.23407	0.000515299	0.0151189
Prickle2	2.23147	0.00144491	0.0329143
Fam168a	2.23085	0.000181779	0.00656824
AI593442	2.22533	0.000899666	0.0237803
Ckap5	2.22278	0.000259156	0.00867993
Herc1	2.21944	0.000295578	0.00967887
Ehd4	2.2158	9.94327e-05	0.00415578
Aco2	2.21425	6.33804e-06	0.000447014
Rgs9	2.21017	0.00567549	0.0849586
Kcnc4	2.2065	0.00198681	0.041638
Chst15	2.20627	0.00679878	0.094718
Adar	2.20387	0.00475178	0.075675
Sh3gl2	2.20268	5.85649e-06	0.000415047
Pde4dip	2.20206	0.000665074	0.0185487
Mark1	2.19822	0.00457535	0.0739853
Htr1d	2.19767	0.000619862	0.0175183
Ckmt1	2.19718	0.00150892	0.0338987
Sgpp2	2.18868	2.18291e-06	0.00019408
Sik3	2.18771	0.000783686	0.0212508
Arhgap35	2.18479	5.04964e-07	5.52823e-05
Snph	2.17807	9.92942e-05	0.00415578
Mtmr7	2.17469	3.82553e-06	0.000298964
Pkm	2.17218	4.78816e-08	8.2638e-06
Aifm1	2.16815	0.00543768	0.0824078
Arhgef17	2.16552	0.000242979	0.00823211
Pikfyve	2.16442	0.000452993	0.0136456
Peg3os	2.16303	7.82096e-05	0.00350867
Myh9	2.15636	0.00249471	0.0484733
Adcyap1	2.15403	0.00106955	0.0269592
Slc8a3	2.14684	0.00497781	0.0775207
Pcdh10	2.14501	0.00553869	0.0835073
Stox2	2.14447	0.00135591	0.0313248
4932438A13Rik	2.14174	0.000101375	0.00420103
Laptm4b	2.14053	0.00119727	0.0289356
Copg2	2.13974	0.000799795	0.0216476
Clstn1	2.12859	5.89564e-07	6.4066e-05
Ttbk2	2.12853	0.000128813	0.00503916
Setx	2.12457	0.000712275	0.0196781
Ncan	2.12251	0.0066489	0.0934931
Ttc3	2.11982	4.92901e-07	5.44718e-05
Kmt2c	2.11954	0.000185212	0.00665799
Cables2	2.1195	0.00284659	0.053156
Lpin1	2.11349	0.0011385	0.027943
Stx1b	2.11221	0.000147967	0.00562559
Glrb	2.10914	3.66396e-05	0.00190604
Dzank1	2.10868	5.98566e-07	6.40947e-05
Rnf150	2.10833	1.58541e-05	0.000969081
Rasal2	2.10597	0.00228764	0.0454739
Chml	2.1031	0.00139206	0.0319087
Dync1i1	2.1024	0.00361244	0.0626816
Hecw1	2.09926	0.000166708	0.00620713
Rictor	2.09236	7.31202e-05	0.00332097
Fam155a	2.08211	0.00269606	0.0510337
Dmd	2.07426	0.00273903	0.0516473
Rnf130	2.07141	2.83516e-05	0.00154616
Panx2	2.06754	0.00336976	0.0596019
Ppp4r4	2.06696	0.0052053	0.0799599
Trio	2.06407	0.000297508	0.00972038
Arhgap32	2.0615	8.3363e-05	0.00370232
Sgip1	2.06049	0.000104225	0.00429381
Rapgef1	2.05485	9.15935e-05	0.0039404
Sacm1l	2.05452	0.00111161	0.0275461
Sipa1l3	2.05006	0.00604972	0.0883079
Herc2	2.04856	0.000582498	0.0167883
Epb4.1l3	2.04785	1.61235e-06	0.000156644
Ogdh	2.04193	2.0605e-06	0.000187749
Sptbn1	2.04186	0.00441494	0.0727162
Unc13a	2.0416	4.42876e-05	0.00226135
Enpp5	2.03975	4.85701e-05	0.00244854
Kcnma1	2.03558	0.00196112	0.0412173
Slc6a17	2.03519	1.00197e-06	0.000104248
Clec16a	2.03016	0.000466205	0.0139862
Cntnap2	2.02812	1.79364e-05	0.00106529
Slc25a12	2.02804	0.00122804	0.0292934
Iars	2.02615	0.000238755	0.00812654
Itsn1	2.02402	0.00128148	0.0299351
Fam210a	2.02391	0.00273168	0.051575
B3glct	2.01545	0.00328803	0.0588236
Polr3h	2.00596	0.00499623	0.077725
Epb4.1l4a	2.00528	0.00251804	0.0487975
Mga	2.00349	0.00311064	0.0564068

## Sheet: Overlapping genes
Tissue Runx3-Ribotag / Culture Runx3-Ribotag	Tissue Runx3-Ribotag / SILAC	Culture Runx3-Ribotag / SILAC
6430548M08Rik	Mcam	Map1a
A230077H06Rik	Mtap1b	Mcam
A830010M20Rik
AI593442
Aak1
Abcd2
Ablim2
Ache
Aco2
Acox3
Acsl6
Adat1
Adcy1
Adcyap1r1
Adra1d
Aff1
Agl
Aifm1
Akap6
Aldoc
Amph
Ankrd26
Ankrd34c
Ano1
Apbb2
Arap2
Arhgap24
Arhgap36
Arhgef17
Arid5b
Asah2
Astn2
Atp11a
Atp1a3
Atp2b2
Atp2b3
Atp8a2
B3galt5
Bend7
Bpifb1
C1ql3
Cables2
Cacng5
Cap2
Car2
Cbln2
Ccdc108
Cdh12
Cdh7
Cdh8
Cdkl4
Cep290
Cep350
Chd6
Chgb
Chst15
Ckb
Ckmt1
Clec16a
Clmp
Clrn1
Clspn
Clstn1
Clstn2
Clstn3
Clu
Cntnap2
Crim1
Cux2
Cygb
Cyp2s1
D430041D05Rik
D630039A03Rik
D630045J12Rik
Dcc
Dennd5b
Depdc5
Dip2a
Dlg2
Dmxl1
Dnm1
Dst
Dzank1
Edil3
Enah
Endod1
Eno2
Epb4.1l1
Epb4.1l4a
Epha6
Epn3
Esrrg
Etl4
Etv1
Eya2
Faim2
Fam155a
Fam168a
Fam19a2
Fam210a
Fat3
Fbxo31
Fgf1
Fhod3
Frmpd4
Gabrg1
Galm
Glrb
Gm15800
Gm16551
Gm5105
Golim4
Got1
Gpr64
Gprc5b
Hapln4
Heatr5a
Herc1
Herc2
Hs3st2
Hspa12a
Hspb6
Htr1d
Ina
Inppl1
Iqsec1
Itga6
Itsn1
Jag2
Jak1
Kank4
Kbtbd11
Kcna1
Kcna2
Kcnc1
Kcnc3
Kcnh1
Kcnh2
Kcnk1
Kcns1
Kif1b
Kif21b
Kndc1
Lancl3
Laptm4b
Lce1g
Lcp1
Ldhal6b
Ldhb
Lgi3
Lhfpl1
Lingo4
Lmcd1
Lphn2
Lpin1
Lrp1b
Lrrc7
Lrrfip1
Lrrk2
Mark1
Mcam
Mctp2
Mdga1
Mdh1
Med12l
Mrvi1
Msh6
Mtmr7
Mtx3
Myh10
Myh14
Myo5a
Myo5b
Ndst4
Nefh
Nefm
Nfasc
Nkain3
Nsg1
Ntrk3
Nxph1
Nyap2
Ogdh
Ogdhl
Olfm2
Olfm4
Onecut1
Opcml
Osbpl6
Oxr1
Pacs1
Pak1
Pak6
Panx2
Pappa
Pappa2
Pcdh10
Pcdh7
Pcdh8
Pcsk6
Pde4d
Pde4dip
Pdk3
Peg3
Pkm
Plcb4
Plcd4
Plekhd1
Plekhg1
Pls1
Plxna1
Pnkd
Ppargc1a
Ppip5k1
Ppm1e
Ppp1r9a
Prepl
Prickle2
Prss12
Prtg
Pth1r
Pthlh
Ptpn4
Pvalb
Pygb
Rab3c
Ralgapa2
Rapgef1
Rapgef5
Rasgrf1
Rcbtb1
Rcsd1
Relt
Rgs2
Rnf150
Runx3
Ryr2
Sacm1l
Sacs
Scn1a
Scn8a
Scrt1
Sdk2
Sema7a
Serpini1
Sfmbt2
Sgip1
Sgpp2
Sh3bgr
Sh3gl2
Sik3
Slc17a7
Slc24a2
Slc25a12
Slc2a13
Slc4a8
Slc6a17
Slc8a3
Slco5a1
Slit2
Slit3
Slitrk1
Slitrk3
Smad9
Snap25
Snph
Sort1
Sparcl1
Sphkap
Spp1
Srpx2
Sstr3
St8sia5
Stx1b
Stxbp5l
Sulf2
Sv2b
Synj1
Synm
Syt2
Tanc1
Tanc2
Tenm1
Tenm4
Thrsp
Tmem132b
Tmem132d
Tmem229b
Tmem47
Tnik
Tnks
Tnrc6b
Tns1
Ttbk2
Ttc3
Unc5c
Unc80
Vamp1
Vav3
Vps13c
Vsnl1
Wdfy3
Wdr72
Whrn
Wnk3
Wnt7a
Ypel2
